# Supplementary material
Source: publisher figshare collection journal article supplement (https://diabetesjournals.figshare.com/articles/dataset/_/12200918)
Supplement: Supplementary file 1 [file 1]

Online Supplemental Table IV: mG4H-Veh Only

| Gene Symbol                | RefSeq                     | Description                                                                                                                                           | logFC<br>mG4H-<br>Veh | P-value | Adj.<br>P-value |
|----------------------------|----------------------------|-------------------------------------------------------------------------------------------------------------------------------------------------------|-----------------------|---------|-----------------|
| Gm4841                     | NM_001034859               | ref Mus musculus predicted gene 4841 (Gm4841), mRNA [NM_001034859]                                                                                    | 2.82                  | 0.000   | 0.044           |
| LOC100045253               | XM_001473935               | ref PREDICTED: Mus musculus similar to Scoc protein (LOC100045253), mRNA [XM_001473935]                                                               | 1.76                  | 0.041   | 1.000           |
| BC023105                   | XM_001471580               | ref PREDICTED: Mus musculus hypothetical LOC667597 (LOC667597), mRNA [XM_001471580]                                                                   | 1.69                  | 0.007   | 0.686           |
| 4930535C22Rik              | AK015975                   | gb Mus musculus adult male testis cDNA, RIKEN full-length enriched library, clone:4930535C22 product:unclassifiable, full insert sequence. [AK015975] | 1.60                  | 0.010   | 0.745           |
| Myl4                       | NM_010858                  | ref Mus musculus myosin, light polypeptide 4 (Myl4), mRNA [NM_010858]                                                                                 | 1.43                  | 0.048   | 1.000           |
| Olf293                     | NM_001011752               | ref Mus musculus olfactory receptor 293 (Olf293), mRNA [NM_001011752]                                                                                 | 1.35                  | 0.002   | 0.391           |
| Olf1032                    | NM_146579                  | ref Mus musculus olfactory receptor 1032 (Olf1032), mRNA [NM_146579]                                                                                  | 1.22                  | 0.023   | 0.948           |
| Dgat2l6                    | NM_001114084               | ref Mus musculus diacylglycerol O-acyltransferase 2-like 6 (Dgat2l6), mRNA [NM_001114084]                                                             | 1.22                  | 0.026   | 0.971           |
| LOC100047444               | XM_001478156               | ref PREDICTED: Mus musculus hypothetical protein LOC100047444 (LOC100047444), mRNA [XM_001478156]                                                     | 1.20                  | 0.010   | 0.762           |
| 1700014N06Rik              | ENSMUST00000059808         | ens RIKEN cDNA 1700014N06 gene Gene [Source:MGI Symbol;Acc:MGI:1916639] [ENSMUST00000059808]                                                          | 1.04                  | 0.036   | 1.000           |
| chr3:30099759-30133959_F   | chr3:30099759-30133959_F   | lincRNA:chr3:30099759-30133959 forward strand                                                                                                         | 0.98                  | 0.005   | 0.620           |
| chr11:53592946-53637922_F  | chr11:53592946-53637922_F  | lincRNA:chr11:53592946-53637922 forward strand                                                                                                        | 0.98                  | 0.013   | 0.802           |
| Ccdc7                      | NM_029061                  | ref Mus musculus coiled-coil domain containing 7 (Ccdc7), mRNA [NM_029061]                                                                            | 0.97                  | 0.026   | 0.974           |
| Cxcl10                     | NM_021274                  | ref Mus musculus chemokine (C-X-C motif) ligand 10 (Cxcl10), mRNA [NM_021274]                                                                         | 0.96                  | 0.010   | 0.747           |
| 2010317E24Rik              | NM_001081085               | ref Mus musculus RIKEN cDNA 2010317E24 gene (2010317E24Rik), mRNA [NM_001081085]                                                                      | 0.95                  | 0.013   | 0.802           |
| chr4:153321746-153324612_R | chr4:153321746-153324612_R | lincRNA:chr4:153321746-153324612 reverse strand                                                                                                       | 0.93                  | 0.006   | 0.635           |
| ENSMUST00000082269         | ENSMUST00000082269         | ens RIKEN cDNA 3110018I06 gene Gene [Source:MGI Symbol;Acc:MGI:1920410] [ENSMUST00000082269]                                                          | 0.93                  | 0.003   | 0.457           |
| Olf681                     | NM_207557                  | ref Mus musculus olfactory receptor 681 (Olf681), mRNA [NM_207557]                                                                                    | 0.90                  | 0.005   | 0.578           |
| chr11:18753941-18760118_R  | chr11:18753941-18760118_R  | lincRNA:chr11:18753941-18760118 reverse strand                                                                                                        | 0.90                  | 0.021   | 0.899           |
| Vmn1r37                    | NM_134165                  | ref Mus musculus vomeronasal 1 receptor 37 (Vmn1r37), mRNA [NM_134165]                                                                                | 0.90                  | 0.008   | 0.694           |
| Olf678                     | NM_146758                  | ref Mus musculus olfactory receptor 678 (Olf678), mRNA [NM_146758]                                                                                    | 0.88                  | 0.019   | 0.880           |
| LOC100044106               | XM_001472518               | ref PREDICTED: Mus musculus similar to plexin C1 (LOC100044106), mRNA [XM_001472518]                                                                  | 0.88                  | 0.009   | 0.720           |
| chr17:15368546-15377747_R  | chr17:15368546-15377747_R  | lincRNA:chr17:15368546-15377747 reverse strand                                                                                                        | 0.88                  | 0.000   | 0.117           |
| chr2:25778863-25780329_F   | chr2:25778863-25780329_F   | lincRNA:chr2:25778863-25780329 forward strand                                                                                                         | 0.84                  | 0.024   | 0.957           |
| ENSMUST00000088133         | ENSMUST00000088133         | ens RIKEN cDNA 1700003E24 gene Gene [Source:MGI Symbol;Acc:MGI:1916607] [ENSMUST00000088133]                                                          | 0.84                  | 0.048   | 1.000           |
| Gm2945                     | XM_001475181               | ref PREDICTED: Mus musculus hypothetical protein LOC100040750 (LOC100040750), mRNA [XM_001475181]                                                     | 0.82                  | 0.011   | 0.766           |
| LOC100047548               | XM_001478382               | ref PREDICTED: Mus musculus hypothetical protein LOC100047548 (LOC100047548), mRNA [XM_001478382]                                                     | 0.82                  | 0.020   | 0.889           |

Online Supplemental Table IV: mG4H-Veh Only

| Gene Symbol                       | RefSeq                     | Description                                                                                                                                                           | logFC<br>mG4H-<br>Veh | P-value | Adj.<br>P-value |
|-----------------------------------|----------------------------|-----------------------------------------------------------------------------------------------------------------------------------------------------------------------|-----------------------|---------|-----------------|
| <b>XM_001474213</b>               | XM_001474213               | ref PREDICTED: Mus musculus hypothetical protein LOC100045723 (LOC100045723), mRNA [XM_001474213]                                                                     | 0.80                  | 0.030   | 0.998           |
| <b>LOC100039701</b>               | XM_001473357               | ref PREDICTED: Mus musculus hypothetical protein LOC100039701 (LOC100039701), mRNA [XM_001473357]                                                                     | 0.80                  | 0.037   | 1.000           |
| <b>Pap0lb</b>                     | NM_019943                  | ref Mus musculus poly (A) polymerase beta (testis specific) (Pap0lb), mRNA [NM_019943]                                                                                | 0.80                  | 0.003   | 0.434           |
| <b>Gm3854</b>                     | XM_001474836               | ref PREDICTED: Mus musculus hypothetical protein LOC100045615 (LOC100045615), mRNA [XM_001474836]                                                                     | 0.79                  | 0.006   | 0.661           |
| <b>chr2:176598132-176602354_R</b> | chr2:176598132-176602354_R | lincRNA:chr2:176598132-176602354 reverse strand                                                                                                                       | 0.78                  | 0.028   | 0.986           |
| <b>chr11:33414450-33450750_R</b>  | chr11:33414450-33450750_R  | lincRNA:chr11:33414450-33450750 reverse strand                                                                                                                        | 0.77                  | 0.021   | 0.904           |
| <b>Gfm2</b>                       | NM_001146043               | ref Mus musculus G elongation factor, mitochondrial 2 (Gfm2), nuclear gene encoding mitochondrial protein, transcript variant 2, mRNA [NM_001146043]                  | 0.77                  | 0.044   | 1.000           |
| <b>Slc37a4</b>                    | NM_008063                  | ref Mus musculus solute carrier family 37 (glucose-6-phosphate transporter), member 4 (Slc37a4), mRNA [NM_008063]                                                     | 0.76                  | 0.000   | 0.010           |
| <b>LOC100045886</b>               | XM_001475104               | ref PREDICTED: Mus musculus hypothetical protein LOC100045886 (LOC100045886), mRNA [XM_001475104]                                                                     | 0.76                  | 0.033   | 1.000           |
| <b>Spag16</b>                     | NM_025728                  | ref Mus musculus sperm associated antigen 16 (Spag16), transcript variant 2, mRNA [NM_025728]                                                                         | 0.75                  | 0.044   | 1.000           |
| <b>Gm3034</b>                     | XM_001475268               | ref PREDICTED: Mus musculus hypothetical protein LOC100045998 (LOC100045998), mRNA [XM_001475268]                                                                     | 0.75                  | 0.020   | 0.895           |
| <b>1700008J07Rik</b>              | NR_024331                  | ref Mus musculus RIKEN cDNA 1700008J07 gene (1700008J07Rik), non-coding RNA [NR_024331]                                                                               | 0.74                  | 0.031   | 1.000           |
| <b>LOC100038760</b>               | AK090261                   | gb Mus musculus 21 days neonate cerebellum cDNA, RIKEN full-length enriched library, clone:G630030A02 product: hypothetical protein, full insert sequence. [AK090261] | 0.74                  | 0.000   | 0.012           |
| <b>Magea10</b>                    | NM_001085506               | ref Mus musculus melanoma antigen family A, 10 (Magea10), mRNA [NM_001085506]                                                                                         | 0.74                  | 0.018   | 0.868           |
| <b>chr4:145539725-145596000_R</b> | chr4:145539725-145596000_R | lincRNA:chr4:145539725-145596000 reverse strand                                                                                                                       | 0.73                  | 0.034   | 1.000           |
| <b>chr2:130697320-130729670_F</b> | chr2:130697320-130729670_F | lincRNA:chr2:130697320-130729670 forward strand                                                                                                                       | 0.73                  | 0.044   | 1.000           |
| <b>chr14:78936896-78937160_R</b>  | chr14:78936896-78937160_R  | lincRNA:chr14:78936896-78937160 reverse strand                                                                                                                        | 0.73                  | 0.009   | 0.730           |
| <b>C330027C09Rik</b>              | NM_172616                  | ref Mus musculus RIKEN cDNA C330027C09 gene (C330027C09Rik), mRNA [NM_172616]                                                                                         | 0.71                  | 0.021   | 0.912           |
| <b>Tas2r108</b>                   | NM_020502                  | ref Mus musculus taste receptor, type 2, member 108 (Tas2r108), mRNA [NM_020502]                                                                                      | 0.71                  | 0.005   | 0.611           |
| <b>chr19:29582018-29596693_F</b>  | chr19:29582018-29596693_F  | lincRNA:chr19:29582018-29596693 forward strand                                                                                                                        | 0.71                  | 0.000   | 0.117           |
| <b>Vmn2r101</b>                   | NM_001104563               | ref Mus musculus vomeronasal 2, receptor 101 (Vmn2r101), mRNA [NM_001104563]                                                                                          | 0.71                  | 0.034   | 1.000           |
| <b>Gm847</b>                      | XM_001477392               | ref PREDICTED: Mus musculus gene model 847, (NCBI) (Gm847), mRNA [XM_001477392]                                                                                       | 0.70                  | 0.019   | 0.882           |
| <b>Aqp4</b>                       | NM_009700                  | ref Mus musculus aquaporin 4 (Aqp4), mRNA [NM_009700]                                                                                                                 | 0.70                  | 0.002   | 0.357           |
| <b>Pth2r</b>                      | NM_139270                  | ref Mus musculus parathyroid hormone 2 receptor (Pth2r), mRNA [NM_139270]                                                                                             | 0.69                  | 0.016   | 0.848           |

| Online Supplemental Table IV: mG4H-Veh Only |                             |                                                                                                                                                               |                       |         |                 |
|---------------------------------------------|-----------------------------|---------------------------------------------------------------------------------------------------------------------------------------------------------------|-----------------------|---------|-----------------|
| Gene Symbol                                 | RefSeq                      | Description                                                                                                                                                   | logFC<br>mG4H-<br>Veh | P-value | Adj.<br>P-value |
| Gm7860                                      | XR_030748                   | ref PREDICTED: Mus musculus similar to ribosomal protein S2 (LOC665947), misc RNA [XR_030748]                                                                 | 0.68                  | 0.048   | 1.000           |
| F830016B08Rik                               | NM_001101475                | ref Mus musculus RIKEN cDNA F830016B08 gene (F830016B08Rik), mRNA [NM_001101475]                                                                              | 0.67                  | 0.028   | 0.983           |
| Spag4                                       | NM_139151                   | ref Mus musculus sperm associated antigen 4 (Spag4), mRNA [NM_139151]                                                                                         | 0.67                  | 0.003   | 0.456           |
| Gm6713                                      | XM_987764                   | ref PREDICTED: Mus musculus predicted gene, EG626858 (EG626858), mRNA [XM_987764]                                                                             | 0.67                  | 0.042   | 1.000           |
| Gm9805                                      | XM_001477677                | ref PREDICTED: Mus musculus predicted gene, ENSMUSG00000046088 (ENSMUSG00000046088), mRNA [XM_001477677]                                                      | 0.66                  | 0.039   | 1.000           |
| chr7:137486825-137498500_F                  | chr7:137486825-137498500_F  | lincRNA:chr7:137486825-137498500 forward strand                                                                                                               | 0.66                  | 0.049   | 1.000           |
| 2610035F20Rik                               | AK042842                    | gb Mus musculus 7 days neonate cerebellum cDNA, RIKEN full-length enriched library, clone:A730029P14 product:unclassifiable, full insert sequence. [AK042842] | 0.66                  | 0.003   | 0.457           |
| chrX:65756325-65757543_F                    | chrX:65756325-65757543_F    | lincRNA:chrX:65756325-65757543 forward strand                                                                                                                 | 0.66                  | 0.046   | 1.000           |
| Cntn2                                       | NM_177129                   | ref Mus musculus contactin 2 (Cntn2), mRNA [NM_177129]                                                                                                        | 0.65                  | 0.002   | 0.405           |
| chr12:110845020-110850870_F                 | chr12:110845020-110850870_F | lincRNA:chr12:110845020-110850870 forward strand                                                                                                              | 0.65                  | 0.049   | 1.000           |
| chr12:53669892-53710742_R                   | chr12:53669892-53710742_R   | lincRNA:chr12:53669892-53710742 reverse strand                                                                                                                | 0.65                  | 0.022   | 0.926           |
| Reg3a                                       | NM_011259                   | ref Mus musculus regenerating islet-derived 3 alpha (Reg3a), mRNA [NM_011259]                                                                                 | 0.65                  | 0.013   | 0.808           |
| ENSMUST00000053171                          | ENSMUST00000053171          | ens Ileucine rich repeat containing 49 Gene [Source:MGI (curated);Acc:MGI:2442689] [ENSMUST00000053171]                                                       | 0.65                  | 0.050   | 1.000           |
| chr9:56646768-56649068_R                    | chr9:56646768-56649068_R    | lincRNA:chr9:56646768-56649068 reverse strand                                                                                                                 | 0.64                  | 0.048   | 1.000           |
| Gm14773                                     | ENSMUST00000073994          | ref PREDICTED: Mus musculus similar to Predicted gene, EG546347 (LOC670074), mRNA [XM_001474745]                                                              | 0.64                  | 0.012   | 0.793           |
| ENSMUST00000090257                          | ENSMUST00000090257          | ref PREDICTED: Mus musculus predicted gene, EG666668 (EG666668), mRNA [XM_985281]                                                                             | 0.64                  | 0.013   | 0.793           |
| chr7:67111261-67120645_R                    | chr7:67111261-67120645_R    | lincRNA:chr7:67111261-67120645 reverse strand                                                                                                                 | 0.64                  | 0.001   | 0.331           |
| chr1:115787961-115860711_R                  | chr1:115787961-115860711_R  | lincRNA:chr1:115787961-115860711 reverse strand                                                                                                               | 0.64                  | 0.012   | 0.793           |
| Ralgapa2                                    | NM_001033348                | ref Mus musculus Ral GTPase activating protein, alpha subunit 2 (catalytic) (Ralgapa2), mRNA [NM_001033348]                                                   | 0.64                  | 0.017   | 0.862           |
| chr13:112337405-112356455_F                 | chr13:112337405-112356455_F | lincRNA:chr13:112337405-112356455 forward strand                                                                                                              | 0.64                  | 0.004   | 0.549           |
| Pex26                                       | NM_028730                   | ref Mus musculus peroxisomal biogenesis factor 26 (Pex26), mRNA [NM_028730]                                                                                   | 0.64                  | 0.008   | 0.708           |
| chr11:33414450-33450750_F                   | chr11:33414450-33450750_F   | lincRNA:chr11:33414450-33450750 forward strand                                                                                                                | 0.63                  | 0.047   | 1.000           |
| chr6:3283191-3284581_R                      | chr6:3283191-3284581_R      | lincRNA:chr6:3283191-3284581 reverse strand                                                                                                                   | 0.63                  | 0.035   | 1.000           |
| Tmco1                                       | NM_001039483                | ref Mus musculus transmembrane and coiled-coil domains 1 (Tmco1), mRNA [NM_001039483]                                                                         | 0.63                  | 0.024   | 0.952           |
| chr4:59105222-59122541_R                    | chr4:59105222-59122541_R    | lincRNA:chr4:59105222-59122541 reverse strand                                                                                                                 | 0.63                  | 0.023   | 0.938           |
| ENSMUST00000064878                          | ENSMUST00000064878          | ens Putative uncharacterized protein Fragment [Source:UniProtKB/TrEMBL;Acc:Q8CDT1] [ENSMUST00000064878]                                                       | 0.63                  | 0.050   | 1.000           |
| ENSMUST00000032872                          | ENSMUST00000032872          | ens RIKEN cDNA 1700010L04 gene Gene [Source:MGI Symbol;Acc:MGI:1916583] [ENSMUST00000032872]                                                                  | 0.63                  | 0.023   | 0.943           |

| Online Supplemental Table IV: mG4H-Veh Only |                             |                                                                                                                                                                |                       |         |                 |
|---------------------------------------------|-----------------------------|----------------------------------------------------------------------------------------------------------------------------------------------------------------|-----------------------|---------|-----------------|
| Gene Symbol                                 | RefSeq                      | Description                                                                                                                                                    | logFC<br>mG4H-<br>Veh | P-value | Adj.<br>P-value |
| chr4:135896689-135918414_R                  | chr4:135896689-135918414_R  | lincRNA:chr4:135896689-135918414 reverse strand                                                                                                                | 0.63                  | 0.001   | 0.259           |
| chr6:95418306-95424131_F                    | chr6:95418306-95424131_F    | lincRNA:chr6:95418306-95424131 forward strand                                                                                                                  | 0.63                  | 0.014   | 0.825           |
| chr12:85252300-85253597_R                   | chr12:85252300-85253597_R   | lincRNA:chr12:85252300-85253597 reverse strand                                                                                                                 | 0.62                  | 0.047   | 1.000           |
| Tas2r107                                    | NM_199154                   | ref Mus musculus taste receptor, type 2, member 107 (Tas2r107), mRNA [NM_199154]                                                                               | 0.62                  | 0.041   | 1.000           |
| Chrdl2                                      | NM_133709                   | ref Mus musculus chordin-like 2 (Chrdl2), mRNA [NM_133709]                                                                                                     | 0.62                  | 0.005   | 0.581           |
| chr14:73729977-73751877_F                   | chr14:73729977-73751877_F   | lincRNA:chr14:73729977-73751877 forward strand                                                                                                                 | 0.61                  | 0.042   | 1.000           |
| Snrpn                                       | NM_001082962                | ref Mus musculus small nuclear ribonucleoprotein N (Snrpn), transcript variant 3, mRNA [NM_001082962]                                                          | 0.61                  | 0.000   | 0.188           |
| Rab3c                                       | NM_023852                   | ref Mus musculus RAB3C, member RAS oncogene family (Rab3c), mRNA [NM_023852]                                                                                   | 0.61                  | 0.008   | 0.708           |
| ENSMUST00000050474                          | ENSMUST00000050474          | ens transmembrane protease, serine 12 Gene [Source:MGI Symbol;Acc:MGI:1922252] [ENSMUST00000050474]                                                            | 0.61                  | 0.041   | 1.000           |
| Abcb5                                       | NM_029961                   | ref Mus musculus ATP-binding cassette, sub-family B (MDR/TAP), member 5 (Abcb5), mRNA [NM_029961]                                                              | 0.61                  | 0.035   | 1.000           |
| chr15:74478614-74478997_F                   | chr15:74478614-74478997_F   | lincRNA:chr15:74478614-74478997 forward strand                                                                                                                 | 0.60                  | 0.012   | 0.790           |
| Gm648                                       | NM_001033372                | ref Mus musculus predicted gene 648 (Gm648), mRNA [NM_001033372]                                                                                               | 0.60                  | 0.040   | 1.000           |
| chr17:15357376-15385701_R                   | chr17:15357376-15385701_R   | lincRNA:chr17:15357376-15385701 reverse strand                                                                                                                 | 0.60                  | 0.031   | 1.000           |
| chr1:52706748-52712402_R                    | chr1:52706748-52712402_R    | lincRNA:chr1:52706748-52712402 reverse strand                                                                                                                  | 0.60                  | 0.036   | 1.000           |
| chr16:13752215-13764390_R                   | chr16:13752215-13764390_R   | lincRNA:chr16:13752215-13764390 reverse strand                                                                                                                 | 0.60                  | 0.016   | 0.845           |
| chr17:15368546-15377747_R                   | chr17:15368546-15377747_R   | lincRNA:chr17:15368546-15377747 reverse strand                                                                                                                 | 0.60                  | 0.008   | 0.708           |
| Gm2554                                      | XM_001473936                | ref PREDICTED: Mus musculus hypothetical protein LOC100040010 (LOC100040010), mRNA [XM_001473936]                                                              | 0.60                  | 0.032   | 1.000           |
| Gm9306                                      | XM_001478806                | ref PREDICTED: Mus musculus similar to development and differentiation enhancing factor 2 (LOC668698), mRNA [XM_001478806]                                     | 0.60                  | 0.007   | 0.664           |
| chr7:67111261-67120697_R                    | chr7:67111261-67120697_R    | lincRNA:chr7:67111261-67120697 reverse strand                                                                                                                  | 0.59                  | 0.014   | 0.825           |
| chr8:114477602-114488627_F                  | chr8:114477602-114488627_F  | lincRNA:chr8:114477602-114488627 forward strand                                                                                                                | 0.59                  | 0.010   | 0.745           |
| chr12:110738120-110769295_R                 | chr12:110738120-110769295_R | lincRNA:chr12:110738120-110769295 reverse strand                                                                                                               | 0.59                  | 0.004   | 0.516           |
| Prokr2                                      | NM_144944                   | ref Mus musculus prokineticin receptor 2 (Prokr2), mRNA [NM_144944]                                                                                            | 0.59                  | 0.033   | 1.000           |
| Serpib5                                     | NM_009257                   | ref Mus musculus serine (or cysteine) peptidase inhibitor, clade B, member 5 (Serpib5), mRNA [NM_009257]                                                       | 0.59                  | 0.026   | 0.972           |
| chr7:67111261-67120697_R                    | chr7:67111261-67120697_R    | lincRNA:chr7:67111261-67120697 reverse strand                                                                                                                  | 0.59                  | 0.005   | 0.602           |
| 5330411J11Rik                               | AK017239                    | gb Mus musculus adult male pituitary gland cDNA, RIKEN full-length enriched library, clone:5330411J11 product:unclassifiable, full insert sequence. [AK017239] | 0.59                  | 0.048   | 1.000           |
| chr13:28067341-28067814_F                   | chr13:28067341-28067814_F   | lincRNA:chr13:28067341-28067814 forward strand                                                                                                                 | 0.58                  | 0.042   | 1.000           |
| AL118430                                    | BP765696                    | gb BP765696 mouse (C57BL [BP765696]                                                                                                                            | 0.58                  | 0.020   | 0.883           |
| 2010106E10Rik                               | NM_001168590                | ref Mus musculus RIKEN cDNA 2010106E10 gene (2010106E10Rik), transcript variant 1, mRNA [NM_001168590]                                                         | 0.58                  | 0.024   | 0.954           |

Online Supplemental Table IV: mG4H-Veh Only

| Gene Symbol                | RefSeq                     | Description                                                                                                                                      | logFC<br>mG4H-<br>Veh | P-value | Adj.<br>P-value |
|----------------------------|----------------------------|--------------------------------------------------------------------------------------------------------------------------------------------------|-----------------------|---------|-----------------|
| Gm9623                     | XM_001478954               | ref PREDICTED: Mus musculus similar to Ubtf protein (LOC674417), mRNA [XM_001478954]                                                             | 0.58                  | 0.028   | 0.986           |
| chr3:126969590-126972626_R | chr3:126969590-126972626_R | lincRNA:chr3:126969590-126972626 reverse strand                                                                                                  | 0.58                  | 0.021   | 0.912           |
| chr1:92546371-92551596_F   | chr1:92546371-92551596_F   | lincRNA:chr1:92546371-92551596 forward strand                                                                                                    | 0.57                  | 0.041   | 1.000           |
| Il20                       | NM_021380                  | ref Mus musculus interleukin 20 (Il20), mRNA [NM_021380]                                                                                         | 0.57                  | 0.007   | 0.679           |
| Igtp                       | NM_018738                  | ref Mus musculus interferon gamma induced GTPase (Igtp), mRNA [NM_018738]                                                                        | 0.57                  | 0.020   | 0.895           |
| TC1608887                  | TC1608887                  | tc Q86VE0_HUMAN (Q86VE0) Myb protein P42POP, partial (5%) [TC1608887]                                                                            | 0.57                  | 0.031   | 1.000           |
| A_55_P2170702              | A_55_P2170702              | Unknown                                                                                                                                          | 0.57                  | 0.042   | 1.000           |
| Olfr1165-ps                | NM_146648                  | ref Mus musculus olfactory receptor 1165, pseudogene (Olfr1165-ps), mRNA [NM_146648]                                                             | 0.57                  | 0.040   | 1.000           |
| 4933411G06Rik              | ENSMUST00000075909         | ens RIKEN cDNA 4933411G06 gene Gene [Source:MGI Symbol;Acc:MGI:1918340] [ENSMUST00000075909]                                                     | 0.57                  | 0.012   | 0.787           |
| chr3:121627545-121639470_F | chr3:121627545-121639470_F | lincRNA:chr3:121627545-121639470 forward strand                                                                                                  | 0.56                  | 0.007   | 0.672           |
| chr3:41143423-41359623_R   | chr3:41143423-41359623_R   | lincRNA:chr3:41143423-41359623 reverse strand                                                                                                    | 0.56                  | 0.022   | 0.935           |
| chr6:129151512-129208737_F | chr6:129151512-129208737_F | lincRNA:chr6:129151512-129208737 forward strand                                                                                                  | 0.56                  | 0.015   | 0.831           |
| Ccl5                       | NM_013653                  | ref Mus musculus chemokine (C-C motif) ligand 5 (Ccl5), mRNA [NM_013653]                                                                         | 0.56                  | 0.003   | 0.464           |
| Gm10590                    | XR_001565                  | ref PREDICTED: Mus musculus similar to 4933409K07Rik protein (LOC545614), misc RNA [XR_001565]                                                   | 0.56                  | 0.013   | 0.793           |
| 1700015G11Rik              | NR_033466                  | ref Mus musculus RIKEN cDNA 1700015G11 gene (1700015G11Rik), non-coding RNA [NR_033466]                                                          | 0.56                  | 0.008   | 0.708           |
| Vmn2r42                    | NM_009493                  | ref Mus musculus vomeronasal 2, receptor 42 (Vmn2r42), mRNA [NM_009493]                                                                          | 0.56                  | 0.028   | 0.984           |
| chr6:146495766-146496419_R | chr6:146495766-146496419_R | lincRNA:chr6:146495766-146496419 reverse strand                                                                                                  | 0.55                  | 0.024   | 0.957           |
| chr10:84010161-84016083_R  | chr10:84010161-84016083_R  | lincRNA:chr10:84010161-84016083 reverse strand                                                                                                   | 0.55                  | 0.048   | 1.000           |
| Gm2835                     | XM_001474894               | ref PREDICTED: Mus musculus similar to Ubtf protein (LOC100040549), mRNA [XM_001474894]                                                          | 0.55                  | 0.034   | 1.000           |
| chr17:17143325-17181500_R  | chr17:17143325-17181500_R  | lincRNA:chr17:17143325-17181500 reverse strand                                                                                                   | 0.55                  | 0.047   | 1.000           |
| Gm8700                     | XM_991187                  | ref PREDICTED: Mus musculus hypothetical LOC667552 (LOC667552), mRNA [XM_991187]                                                                 | 0.55                  | 0.030   | 0.998           |
| ENSMUST00000098619         | ENSMUST00000098619         | ens Putative uncharacterized protein [Source:UniProtKB/TrEMBL;Acc:Q3TZ85] [ENSMUST00000098619]                                                   | 0.54                  | 0.029   | 0.986           |
| Ccl12                      | NM_011331                  | ref Mus musculus chemokine (C-C motif) ligand 12 (Ccl12), mRNA [NM_011331]                                                                       | 0.54                  | 0.008   | 0.694           |
| chr18:36470130-36489110_R  | chr18:36470130-36489110_R  | lincRNA:chr18:36470130-36489110 reverse strand                                                                                                   | 0.54                  | 0.011   | 0.774           |
| Csnka2ip                   | NM_173861                  | ref Mus musculus casein kinase 2, alpha prime interacting protein (Csnka2ip), mRNA [NM_173861]                                                   | 0.54                  | 0.017   | 0.861           |
| 4932441J04Rik              | AK044558                   | gb Mus musculus adult retina cDNA, RIKEN full-length enriched library, clone:A930022K23 product:unclassifiable, full insert sequence. [AK044558] | 0.54                  | 0.006   | 0.628           |
| chr15:3230734-3251196_R    | chr15:3230734-3251196_R    | lincRNA:chr15:3230734-3251196 reverse strand                                                                                                     | 0.54                  | 0.029   | 0.986           |
| chr9:68349343-68411643_R   | chr9:68349343-68411643_R   | lincRNA:chr9:68349343-68411643 reverse strand                                                                                                    | 0.54                  | 0.018   | 0.864           |
| Gbp1                       | NM_010259                  | ref Mus musculus guanylate binding protein 1 (Gbp1), mRNA [NM_010259]                                                                            | 0.54                  | 0.031   | 0.998           |

Online Supplemental Table IV: mG4H-Veh Only

| Gene Symbol                | RefSeq                     | Description                                                                                                                                                                             | logFC<br>mG4H-<br>Veh | P-value | Adj.<br>P-value |
|----------------------------|----------------------------|-----------------------------------------------------------------------------------------------------------------------------------------------------------------------------------------|-----------------------|---------|-----------------|
| Tmem211                    | NM_001033428               | ref Mus musculus transmembrane protein 211 (Tmem211), mRNA [NM_001033428]                                                                                                               | 0.54                  | 0.014   | 0.813           |
| chr6:5311375-5328075_R     | chr6:5311375-5328075_R     | lincRNA:chr6:5311375-5328075 reverse strand                                                                                                                                             | 0.53                  | 0.020   | 0.883           |
| chr5:112205091-112240992_R | chr5:112205091-112240992_R | lincRNA:chr5:112205091-112240992 reverse strand                                                                                                                                         | 0.53                  | 0.022   | 0.922           |
| 4921528O07Rik              | NM_030071                  | ref Mus musculus RIKEN cDNA 4921528O07 gene (4921528O07Rik), mRNA [NM_030071]                                                                                                           | 0.53                  | 0.019   | 0.881           |
| chr10:66574421-66575488_F  | chr10:66574421-66575488_F  | lincRNA:chr10:66574421-66575488 forward strand                                                                                                                                          | 0.52                  | 0.000   | 0.158           |
| Aff2                       | NM_008032                  | ref Mus musculus AF4/FMR2 family, member 2 (Aff2), mRNA [NM_008032]                                                                                                                     | 0.52                  | 0.012   | 0.783           |
| Gm15246                    | XM_001475551               | ref PREDICTED: Mus musculus similar to Ser/Arg-related nuclear matrix protein (LOC100040950), mRNA [XM_001475551]                                                                       | 0.52                  | 0.019   | 0.881           |
| chr5:124485370-124502361_R | chr5:124485370-124502361_R | lincRNA:chr5:124485370-124502361 reverse strand                                                                                                                                         | 0.52                  | 0.003   | 0.495           |
| Trem12                     | NM_001033405               | ref Mus musculus triggering receptor expressed on myeloid cells-like 2 (Trem12), mRNA [NM_001033405]                                                                                    | 0.52                  | 0.016   | 0.848           |
| chr7:77555482-77634858_F   | chr7:77555482-77634858_F   | lincRNA:chr7:77555482-77634858 forward strand                                                                                                                                           | 0.52                  | 0.040   | 1.000           |
| chr14:27176652-27227602_R  | chr14:27176652-27227602_R  | lincRNA:chr14:27176652-27227602 reverse strand                                                                                                                                          | 0.52                  | 0.039   | 1.000           |
| Slc25a31                   | NM_178386                  | ref Mus musculus solute carrier family 25 (mitochondrial carrier; adenine nucleotide translocator), member 31 (Slc25a31), nuclear gene encoding mitochondrial protein, mRNA [NM_178386] | 0.51                  | 0.038   | 1.000           |
| D5Erttd577e                | NM_177187                  | ref Mus musculus DNA segment, Chr 5, ERATO Doi 577, expressed (D5Erttd577e), mRNA [NM_177187]                                                                                           | 0.51                  | 0.009   | 0.720           |
| Zfp128                     | NM_153802                  | ref Mus musculus zinc finger protein 128 (Zfp128), mRNA [NM_153802]                                                                                                                     | 0.51                  | 0.009   | 0.734           |
| Slc5a1                     | NM_019810                  | ref Mus musculus solute carrier family 5 (sodium/glucose cotransporter), member 1 (Slc5a1), mRNA [NM_019810]                                                                            | 0.51                  | 0.018   | 0.875           |
| Olf894                     | NM_146868                  | ref Mus musculus olfactory receptor 894 (Olf894), mRNA [NM_146868]                                                                                                                      | 0.51                  | 0.030   | 0.998           |
| ENSMUST00000054860         | ENSMUST00000054860         | ens predicted gene 9801 Gene [Source:MGI Symbol;Acc:MGI:3647139] [ENSMUST00000054860]                                                                                                   | 0.51                  | 0.028   | 0.983           |
| chr15:59966962-59972812_F  | chr15:59966962-59972812_F  | lincRNA:chr15:59966962-59972812 forward strand                                                                                                                                          | 0.51                  | 0.044   | 1.000           |
| chrX:100745320-100819322_F | chrX:100745320-100819322_F | lincRNA:chrX:100745320-100819322 forward strand                                                                                                                                         | 0.50                  | 0.040   | 1.000           |
| LOC676811                  | XM_001478448               | ref PREDICTED: Mus musculus similar to ALY (LOC676811), mRNA [XM_001478448]                                                                                                             | 0.50                  | 0.025   | 0.969           |
| Pdcd1                      | NM_008798                  | ref Mus musculus programmed cell death 1 (Pdcd1), mRNA [NM_008798]                                                                                                                      | 0.50                  | 0.016   | 0.848           |
| chr4:115577276-115577566_F | chr4:115577276-115577566_F | lincRNA:chr4:115577276-115577566 forward strand                                                                                                                                         | 0.50                  | 0.033   | 1.000           |
| chr17:21752466-21793451_F  | chr17:21752466-21793451_F  | lincRNA:chr17:21752466-21793451 forward strand                                                                                                                                          | 0.50                  | 0.011   | 0.770           |
| chr6:121035524-121061074_F | chr6:121035524-121061074_F | lincRNA:chr6:121035524-121061074 forward strand                                                                                                                                         | 0.49                  | 0.049   | 1.000           |
| chr9:20784567-20799942_F   | chr9:20784567-20799942_F   | lincRNA:chr9:20784567-20799942 forward strand                                                                                                                                           | 0.49                  | 0.042   | 1.000           |
| ENSMUST00000025618         | ENSMUST00000025618         | ens proprotein convertase subtilisin/kexin type 5 Gene [Source:MGI Symbol;Acc:MGI:97515] [ENSMUST00000025618]                                                                           | 0.49                  | 0.044   | 1.000           |
| chr14:44292637-44293014_F  | chr14:44292637-44293014_F  | lincRNA:chr14:44292637-44293014 forward strand                                                                                                                                          | 0.49                  | 0.046   | 1.000           |
| chr7:69024136-69131056_R   | chr7:69024136-69131056_R   | lincRNA:chr7:69024136-69131056 reverse strand                                                                                                                                           | 0.49                  | 0.001   | 0.263           |



Online Supplemental Table IV: mG4H-Veh Only

| Gene Symbol                 | RefSeq                      | Description                                                                                                          | logFC<br>mG4H-<br>Veh | P-value | Adj.<br>P-value |
|-----------------------------|-----------------------------|----------------------------------------------------------------------------------------------------------------------|-----------------------|---------|-----------------|
| LOC100048267                | XM_001479889                | ref PREDICTED: Mus musculus hypothetical protein LOC100048267 (LOC100048267), mRNA [XM_001479889]                    | 0.49                  | 0.031   | 0.999           |
| Ly6d                        | NM_010742                   | ref Mus musculus lymphocyte antigen 6 complex, locus D (Ly6d), mRNA [NM_010742]                                      | 0.49                  | 0.017   | 0.858           |
| chr5:25168628-25185353_R    | chr5:25168628-25185353_R    | lincRNA:chr5:25168628-25185353 reverse strand                                                                        | 0.49                  | 0.028   | 0.983           |
| chrX:148819227-148844227_R  | chrX:148819227-148844227_R  | lincRNA:chrX:148819227-148844227 reverse strand                                                                      | 0.49                  | 0.015   | 0.831           |
| Gm550                       | ENSMUST00000113537          | ref PREDICTED: Mus musculus gene model 550, (NCBI) (Gm550), mRNA [XM_148894]                                         | 0.49                  | 0.039   | 1.000           |
| Tctex1d4                    | NM_175030                   | ref Mus musculus Tctex1 domain containing 4 (Tctex1d4), mRNA [NM_175030]                                             | 0.49                  | 0.008   | 0.694           |
| Tpte                        | NM_199257                   | ref Mus musculus transmembrane phosphatase with tensin homology (Tpte), mRNA [NM_199257]                             | 0.49                  | 0.050   | 1.000           |
| Klra12                      | NM_010646                   | ref Mus musculus killer cell lectin-like receptor subfamily A, member 12 (Klra12), mRNA [NM_010646]                  | 0.49                  | 0.037   | 1.000           |
| Gm9186                      | XM_001001648                | ref PREDICTED: Mus musculus predicted gene, EG668470 (EG668470), mRNA [XM_001001648]                                 | 0.48                  | 0.014   | 0.812           |
| Hoxd3                       | NM_010468                   | ref Mus musculus homeobox D3 (Hoxd3), mRNA [NM_010468]                                                               | 0.48                  | 0.016   | 0.848           |
| chr13:108548345-108679004_F | chr13:108548345-108679004_F | lincRNA:chr13:108548345-108679004 forward strand                                                                     | 0.48                  | 0.041   | 1.000           |
| Adamts13                    | NM_001190374                | ref Mus musculus ADAMTS-like 3 (Adamts13), mRNA [NM_001190374]                                                       | 0.48                  | 0.015   | 0.831           |
| ENSMUST00000107082          | ENSMUST00000107082          | ens MCG21374, isoform CRA_aNovel protein ; [Source:UniProtKB/TrEMBL;Acc:A6PWP4] [ENSMUST00000107082]                 | 0.48                  | 0.014   | 0.818           |
| Vmn1r65                     | NM_030738                   | ref Mus musculus vomeronasal 1 receptor 65 (Vmn1r65), mRNA [NM_030738]                                               | 0.48                  | 0.032   | 1.000           |
| ENSMUST00000115164          | ENSMUST00000115164          | ens zinc finger protein 451 Gene [Source:MGI (curated);Acc:MGI:2137896] [ENSMUST00000115164]                         | 0.48                  | 0.048   | 1.000           |
| chr5:108538417-108550517_F  | chr5:108538417-108550517_F  | lincRNA:chr5:108538417-108550517 forward strand                                                                      | 0.47                  | 0.014   | 0.812           |
| Olf128                      | NM_206816                   | ref Mus musculus olfactory receptor 128 (Olf128), mRNA [NM_206816]                                                   | 0.47                  | 0.023   | 0.948           |
| chr4:136856064-136875614_R  | chr4:136856064-136875614_R  | lincRNA:chr4:136856064-136875614 reverse strand                                                                      | 0.47                  | 0.018   | 0.865           |
| chr15:102026122-102033725_F | chr15:102026122-102033725_F | lincRNA:chr15:102026122-102033725 forward strand                                                                     | 0.47                  | 0.019   | 0.883           |
| Acta2                       | NM_007392                   | ref Mus musculus actin, alpha 2, smooth muscle, aorta (Acta2), mRNA [NM_007392]                                      | 0.47                  | 0.007   | 0.674           |
| ENSMUST00000120586          | ENSMUST00000120586          | ens chromatin assembly factor 1, subunit B (p60) Gene [Source:MGI (curated);Acc:MGI:1314881] [ENSMUST00000120586]    | 0.47                  | 0.021   | 0.904           |
| Pou4f3                      | NM_138945                   | ref Mus musculus POU domain, class 4, transcription factor 3 (Pou4f3), mRNA [NM_138945]                              | 0.47                  | 0.010   | 0.747           |
| Tac1                        | NM_009311                   | ref Mus musculus tachykinin 1 (Tac1), mRNA [NM_009311]                                                               | 0.47                  | 0.014   | 0.825           |
| Gm4871                      | NM_001101463                | ref Mus musculus predicted gene 4871 (Gm4871), mRNA [NM_001101463]                                                   | 0.47                  | 0.018   | 0.865           |
| ENSMUST00000065087          | ENSMUST00000065087          | ens Riken cDNA C130021I20 gene Gene [Source:MGI Symbol;Acc:MGI:3639863] [ENSMUST00000065087]                         | 0.46                  | 0.030   | 0.998           |
| Sarm1                       | NM_172795                   | ref Mus musculus sterile alpha and HEAT/Armadillo motif containing 1 (Sarm1), transcript variant 2, mRNA [NM_172795] | 0.46                  | 0.002   | 0.409           |
| Chad                        | NM_007689                   | ref Mus musculus chondroadherin (Chad), mRNA [NM_007689]                                                             | 0.46                  | 0.050   | 1.000           |
| Zfp54                       | NM_011760                   | ref Mus musculus zinc finger protein 54 (Zfp54), mRNA [NM_011760]                                                    | 0.46                  | 0.043   | 1.000           |

Online Supplemental Table IV: mG4H-Veh Only

| Gene Symbol                 | RefSeq                      | Description                                                                                                                                                     | logFC<br>mG4H-<br>Veh | P-value | Adj.<br>P-value |
|-----------------------------|-----------------------------|-----------------------------------------------------------------------------------------------------------------------------------------------------------------|-----------------------|---------|-----------------|
| chr2:158169020-158191295_F  | chr2:158169020-158191295_F  | lincRNA:chr2:158169020-158191295 forward strand                                                                                                                 | 0.46                  | 0.044   | 1.000           |
| chr4:73870498-73881323_R    | chr4:73870498-73881323_R    | lincRNA:chr4:73870498-73881323 reverse strand                                                                                                                   | 0.46                  | 0.008   | 0.697           |
| Ankrd33                     | NM_144790                   | ref Mus musculus ankyrin repeat domain 33 (Ankrd33), mRNA [NM_144790]                                                                                           | 0.46                  | 0.041   | 1.000           |
| Fmo9                        | NM_172844                   | ref Mus musculus flavin containing monooxygenase 9 (Fmo9), mRNA [NM_172844]                                                                                     | 0.46                  | 0.015   | 0.831           |
| Stxbp5l                     | NM_172440                   | ref Mus musculus syntaxin binding protein 5-like (Stxbp5l), transcript variant xb, mRNA [NM_172440]                                                             | 0.46                  | 0.041   | 1.000           |
| Trat1                       | NM_198297                   | ref Mus musculus T cell receptor associated transmembrane adaptor 1 (Trat1), mRNA [NM_198297]                                                                   | 0.46                  | 0.008   | 0.708           |
| chr15:92174226-92201201_F   | chr15:92174226-92201201_F   | lincRNA:chr15:92174226-92201201 forward strand                                                                                                                  | 0.46                  | 0.011   | 0.774           |
| Olfr179                     | NM_207693                   | ref Mus musculus olfactory receptor 179 (Olfr179), mRNA [NM_207693]                                                                                             | 0.46                  | 0.029   | 0.987           |
| Rgag4                       | NM_183318                   | ref Mus musculus retrotransposon gag domain containing 4 (Rgag4), transcript variant 1, mRNA [NM_183318]                                                        | 0.46                  | 0.035   | 1.000           |
| Gpd1                        | NM_010271                   | ref Mus musculus glycerol-3-phosphate dehydrogenase 1 (soluble) (Gpd1), mRNA [NM_010271]                                                                        | 0.46                  | 0.000   | 0.113           |
| chr14:80080060-80080597_R   | chr14:80080060-80080597_R   | lincRNA:chr14:80080060-80080597 reverse strand                                                                                                                  | 0.45                  | 0.030   | 0.998           |
| C80171                      | C80171                      | gb C80171 Mouse 3.5-dpc blastocyst cDNA Mus musculus cDNA clone J0077E09 3'. [C80171]                                                                           | 0.45                  | 0.001   | 0.338           |
| chr15:92174226-92201201_F   | chr15:92174226-92201201_F   | lincRNA:chr15:92174226-92201201 forward strand                                                                                                                  | 0.45                  | 0.008   | 0.689           |
| Tas2r106                    | NM_207016                   | ref Mus musculus taste receptor, type 2, member 106 (Tas2r106), mRNA [NM_207016]                                                                                | 0.45                  | 0.007   | 0.685           |
| Gm3731                      | XM_001477753                | ref PREDICTED: Mus musculus hypothetical protein LOC100042222 (LOC100042222), mRNA [XM_001477753]                                                               | 0.45                  | 0.044   | 1.000           |
| Atp8b3                      | NM_026094                   | ref Mus musculus ATPase, class I, type 8B, member 3 (Atp8b3), mRNA [NM_026094]                                                                                  | 0.45                  | 0.016   | 0.848           |
| ENSMUST00000106341          | ENSMUST00000106341          | ens lymphoid enhancer binding factor 1 Gene [Source:MGI (curated);Acc:MGI:96770] [ENSMUST00000106341]                                                           | 0.45                  | 0.033   | 1.000           |
| chr9:122481619-122588714_F  | chr9:122481619-122588714_F  | lincRNA:chr9:122481619-122588714 forward strand                                                                                                                 | 0.44                  | 0.041   | 1.000           |
| chr7:71231097-71233680_R    | chr7:71231097-71233680_R    | lincRNA:chr7:71231097-71233680 reverse strand                                                                                                                   | 0.44                  | 0.018   | 0.873           |
| chr10:116814196-116920696_R | chr10:116814196-116920696_R | lincRNA:chr10:116814196-116920696 reverse strand                                                                                                                | 0.44                  | 0.044   | 1.000           |
| Ankdd1b                     | NM_001042714                | ref Mus musculus ankyrin repeat and death domain containing 1B (Ankdd1b), mRNA [NM_001042714]                                                                   | 0.44                  | 0.017   | 0.857           |
| Gm14702                     | XM_001473776                | ref PREDICTED: Mus musculus hypothetical LOC671950 (LOC671950), mRNA [XM_001473776]                                                                             | 0.44                  | 0.028   | 0.985           |
| 4930564K09Rik               | AK161442                    | gb Mus musculus adult male testis cDNA, RIKEN full-length enriched library, clone:4931406K06 product:unclassifiable, full insert sequence. [AK161442]           | 0.44                  | 0.005   | 0.588           |
| LOC100047070                | ENSMUST00000103380          | ref PREDICTED: Mus musculus similar to [Human Ig rearranged gamma chain mRNA, V-J-C region and complete cds.], gene product (LOC100047070), mRNA [XM_001477334] | 0.44                  | 0.049   | 1.000           |
| Capns2                      | NM_027112                   | ref Mus musculus calpain, small subunit 2 (Capns2), mRNA [NM_027112]                                                                                            | 0.44                  | 0.044   | 1.000           |
| 9130230L23Rik               | NR_027961                   | ref Mus musculus RIKEN cDNA 9130230L23 gene (9130230L23Rik), non-coding RNA [NR_027961]                                                                         | 0.44                  | 0.034   | 1.000           |
| Slnf4                       | NM_011410                   | ref Mus musculus schlafen 4 (Slnf4), mRNA [NM_011410]                                                                                                           | 0.44                  | 0.014   | 0.825           |



Online Supplemental Table IV: mG4H-Veh Only

| Gene Symbol                 | RefSeq                      | Description                                                                                                                                                                                                                            | logFC<br>mG4H-<br>Veh | P-value | Adj.<br>P-value |
|-----------------------------|-----------------------------|----------------------------------------------------------------------------------------------------------------------------------------------------------------------------------------------------------------------------------------|-----------------------|---------|-----------------|
| C79777                      | BG066537                    | gb H3045B01-3 NIA Mouse 15K cDNA Clone Set Mus musculus cDNA clone H3045B01 3', mRNA sequence [BG066537]                                                                                                                               | 0.43                  | 0.042   | 1.000           |
| Kcnu1                       | NM_008432                   | ref Mus musculus potassium channel, subfamily U, member 1 (Kcnu1), mRNA [NM_008432]                                                                                                                                                    | 0.43                  | 0.027   | 0.983           |
| 4933404M02Rik               | NM_025744                   | ref Mus musculus RIKEN cDNA 4933404M02 gene (4933404M02Rik), mRNA [NM_025744]                                                                                                                                                          | 0.43                  | 0.047   | 1.000           |
| ENSMUST00000103362          | ENSMUST00000103362          | ens V kappa light chain Precursor; Fragment [Source:UniProtKB/TrEMBL;Acc:A0N8I8] [ENSMUST00000103362]                                                                                                                                  | 0.43                  | 0.046   | 1.000           |
| chr6:91133122-91133347_R    | chr6:91133122-91133347_R    | lincRNA:chr6:91133122-91133347 reverse strand                                                                                                                                                                                          | 0.43                  | 0.043   | 1.000           |
| G2e3                        | NM_001167963                | ref Mus musculus G2/M-phase specific E3 ubiquitin ligase (G2e3), transcript variant 2, mRNA [NM_001167963]                                                                                                                             | 0.43                  | 0.019   | 0.881           |
| Otx2os1                     | BU504680                    | gb AGENCOURT_8968740 NIH_MGC_94 Mus musculus cDNA clone IMAGE:6492575 5', mRNA sequence [BU504680]                                                                                                                                     | 0.43                  | 0.013   | 0.808           |
| Nmu                         | NM_019515                   | ref Mus musculus neuromedin U (Nmu), mRNA [NM_019515]                                                                                                                                                                                  | 0.43                  | 0.011   | 0.782           |
| chr3:105743656-105744336_R  | chr3:105743656-105744336_R  | lincRNA:chr3:105743656-105744336 reverse strand                                                                                                                                                                                        | 0.43                  | 0.008   | 0.705           |
| 1700020G03Rik               | AK006158                    | gb Mus musculus adult male testis cDNA, RIKEN full-length enriched library, clone:1700020G03 product:unclassifiable, full insert sequence. [AK006158]                                                                                  | 0.43                  | 0.026   | 0.974           |
| Gm6432                      | ENSMUST00000112911          | ref PREDICTED: Mus musculus predicted gene, EG623459 (EG623459), mRNA [XM_887913]                                                                                                                                                      | 0.43                  | 0.040   | 1.000           |
| Rps4y2                      | NR_003634                   | ref Mus musculus ribosomal protein S4, Y-linked 2 (Rps4y2), non-coding RNA [NR_003634]                                                                                                                                                 | 0.42                  | 0.001   | 0.263           |
| Gm7645                      | XM_977134                   | ref PREDICTED: Mus musculus predicted gene, EG665467 (EG665467), mRNA [XM_977134]                                                                                                                                                      | 0.42                  | 0.034   | 1.000           |
| 2610203C20Rik               | NR_015483                   | ref Mus musculus RIKEN cDNA 2610203C20 gene (2610203C20Rik), non-coding RNA [NR_015483]                                                                                                                                                | 0.42                  | 0.008   | 0.705           |
| chr10:120336212-120338944_F | chr10:120336212-120338944_F | lincRNA:chr10:120336212-120338944 forward strand                                                                                                                                                                                       | 0.42                  | 0.012   | 0.786           |
| Gfod1                       | NM_001033399                | ref Mus musculus glucose-fructose oxidoreductase domain containing 1 (Gfod1), mRNA [NM_001033399]                                                                                                                                      | 0.42                  | 0.029   | 0.988           |
| chr12:15774073-15777144_R   | chr12:15774073-15777144_R   | lincRNA:chr12:15774073-15777144 reverse strand                                                                                                                                                                                         | 0.42                  | 0.015   | 0.826           |
| ENSMUST00000085967          | ENSMUST00000085967          | ens Putative uncharacterized protein Fragment [Source:UniProtKB/TrEMBL;Acc:Q8BL58] [ENSMUST00000085967]                                                                                                                                | 0.42                  | 0.006   | 0.635           |
| chr7:88668435-88674440_F    | chr7:88668435-88674440_F    | lincRNA:chr7:88668435-88674440 forward strand                                                                                                                                                                                          | 0.42                  | 0.049   | 1.000           |
| chr15:92174226-92201201_F   | chr15:92174226-92201201_F   | lincRNA:chr15:92174226-92201201 forward strand                                                                                                                                                                                         | 0.42                  | 0.012   | 0.788           |
| LOC674218                   | XM_972872                   | ref PREDICTED: Mus musculus similar to 2900083I11Rik protein (LOC674218), mRNA [XM_972872]                                                                                                                                             | 0.42                  | 0.031   | 0.999           |
| chr6:108556270-108573161_F  | chr6:108556270-108573161_F  | lincRNA:chr6:108556270-108573161 forward strand                                                                                                                                                                                        | 0.42                  | 0.049   | 1.000           |
| Dsc1                        | NM_013504                   | ref Mus musculus desmocollin 1 (Dsc1), mRNA [NM_013504]                                                                                                                                                                                | 0.42                  | 0.041   | 1.000           |
| LOC100047753                | XM_001478826                | ref PREDICTED: Mus musculus similar to Nucleoside diphosphate kinase A (NDK A) (NDP kinase A) (Tumor metastatic process-associated protein) (Metastasis inhibition factor NM23) (NDPK-A) (nm23-M1) (LOC100047753), mRNA [XM_001478826] | 0.42                  | 0.037   | 1.000           |
| BB162755                    | AK157049                    | gb Mus musculus activated spleen cDNA, RIKEN full-length enriched library, clone:F830115G09 product:unclassifiable, full insert sequence. [AK157049]                                                                                   | 0.42                  | 0.033   | 1.000           |

Online Supplemental Table IV: mG4H-Veh Only

| Gene Symbol                 | RefSeq                      | Description                                                                                                                                                       | logFC<br>mG4H-<br>Veh | P-value | Adj.<br>P-value |
|-----------------------------|-----------------------------|-------------------------------------------------------------------------------------------------------------------------------------------------------------------|-----------------------|---------|-----------------|
| E130112N10Rik               | NR_015604                   | ref Mus musculus RIKEN cDNA E130112N10 gene (E130112N10Rik), non-coding RNA [NR_015604]                                                                           | 0.42                  | 0.010   | 0.746           |
| ENSMUST00000115071          | ENSMUST00000115071          | ens protease, serine, 40 Gene [Source:MGI (curated);Acc:MGI:1270857] [ENSMUST00000115071]                                                                         | 0.42                  | 0.030   | 0.998           |
| MyI9                        | NM_172118                   | ref Mus musculus myosin, light polypeptide 9, regulatory (MyI9), mRNA [NM_172118]                                                                                 | 0.41                  | 0.013   | 0.796           |
| Slc6a3                      | NM_010020                   | ref Mus musculus solute carrier family 6 (neurotransmitter transporter, dopamine), member 3 (Slc6a3), mRNA [NM_010020]                                            | 0.41                  | 0.033   | 1.000           |
| LOC100047838                | XM_001478317                | ref PREDICTED: Mus musculus hypothetical protein LOC100047838 (LOC100047838), mRNA [XM_001478317]                                                                 | 0.41                  | 0.021   | 0.914           |
| Cry1                        | NM_007771                   | ref Mus musculus cryptochrome 1 (photolyase-like) (Cry1), mRNA [NM_007771]                                                                                        | 0.41                  | 0.031   | 1.000           |
| A730069N07Rik               | NM_178735                   | ref Mus musculus RIKEN cDNA A730069N07 gene (A730069N07Rik), mRNA [NM_178735]                                                                                     | 0.41                  | 0.036   | 1.000           |
| Siglec1                     | NM_011426                   | ref Mus musculus sialic acid binding Ig-like lectin 1, sialoadhesin (Siglec1), mRNA [NM_011426]                                                                   | 0.41                  | 0.020   | 0.895           |
| Pdhb                        | NM_024221                   | ref Mus musculus pyruvate dehydrogenase (lipoamide) beta (Pdhb), nuclear gene encoding mitochondrial protein, mRNA [NM_024221]                                    | 0.41                  | 0.002   | 0.374           |
| chrX:11671167-11700242_F    | chrX:11671167-11700242_F    | lincRNA:chrX:11671167-11700242 forward strand                                                                                                                     | 0.41                  | 0.034   | 1.000           |
| Gm13247                     | XR_032704                   | ref PREDICTED: Mus musculus similar to crooked legs CG14938-PB (LOC100041433), misc RNA [XR_032704]                                                               | 0.41                  | 0.049   | 1.000           |
| Abca17                      | NM_001031621                | ref Mus musculus ATP-binding cassette, sub-family A (ABC1), member 17 (Abca17), mRNA [NM_001031621]                                                               | 0.41                  | 0.012   | 0.793           |
| Pirt                        | NM_178656                   | ref Mus musculus phosphoinositide-interacting regulator of transient receptor potential channels (Pirt), mRNA [NM_178656]                                         | 0.41                  | 0.026   | 0.973           |
| Prhr                        | NM_201615                   | ref Mus musculus prolactin releasing hormone receptor (Prhr), mRNA [NM_201615]                                                                                    | 0.41                  | 0.036   | 1.000           |
| Gm6119                      | XR_030641                   | ref PREDICTED: Mus musculus predicted gene, EG619980 (EG619980), misc RNA [XR_030641]                                                                             | 0.41                  | 0.016   | 0.854           |
| chr4:12050675-12066450_F    | chr4:12050675-12066450_F    | lincRNA:chr4:12050675-12066450 forward strand                                                                                                                     | 0.41                  | 0.015   | 0.832           |
| Sp5                         | NM_022435                   | ref Mus musculus trans-acting transcription factor 5 (Sp5), mRNA [NM_022435]                                                                                      | 0.41                  | 0.047   | 1.000           |
| ENSMUST00000111720          | ENSMUST00000111720          | ens angiopoietin-like 1 Gene [Source:MGI (curated);Acc:MGI:1919963] [ENSMUST00000111720]                                                                          | 0.41                  | 0.009   | 0.720           |
| Gm606                       | NM_001013761                | ref Mus musculus predicted gene 606 (Gm606), mRNA [NM_001013761]                                                                                                  | 0.41                  | 0.028   | 0.983           |
| chr16:9249688-9275013_F     | chr16:9249688-9275013_F     | lincRNA:chr16:9249688-9275013 forward strand                                                                                                                      | 0.40                  | 0.039   | 1.000           |
| chr18:61798876-61807452_R   | chr18:61798876-61807452_R   | lincRNA:chr18:61798876-61807452 reverse strand                                                                                                                    | 0.40                  | 0.008   | 0.705           |
| chr4:105035450-105059250_F  | chr4:105035450-105059250_F  | lincRNA:chr4:105035450-105059250 forward strand                                                                                                                   | 0.40                  | 0.004   | 0.516           |
| LOC100047984                | XM_001479289                | ref PREDICTED: Mus musculus similar to HVEC cell-cell adhesion molecule/herpesvirus receptor; HveC; PRR; PRR1; HigR; nectin-1 (LOC100047984), mRNA [XM_001479289] | 0.40                  | 0.041   | 1.000           |
| 1700003M07Rik               | XM_001473353                | ref PREDICTED: Mus musculus RIKEN cDNA 1700003M07 gene (1700003M07Rik), mRNA [XM_001473353]                                                                       | 0.40                  | 0.030   | 0.998           |
| chr12:4581550-4599600_F     | chr12:4581550-4599600_F     | lincRNA:chr12:4581550-4599600 forward strand                                                                                                                      | 0.40                  | 0.008   | 0.694           |
| chr10:120116843-120182671_R | chr10:120116843-120182671_R | lincRNA:chr10:120116843-120182671 reverse strand                                                                                                                  | 0.40                  | 0.047   | 1.000           |

Online Supplemental Table IV: mG4H-Veh Only

| Gene Symbol                | RefSeq                     | Description                                                                                                                                                | logFC<br>mG4H-<br>Veh | P-value | Adj.<br>P-value |
|----------------------------|----------------------------|------------------------------------------------------------------------------------------------------------------------------------------------------------|-----------------------|---------|-----------------|
| chr19:23068397-23190256_F  | chr19:23068397-23190256_F  | lincRNA:chr19:23068397-23190256 forward strand                                                                                                             | 0.40                  | 0.033   | 1.000           |
| Nxf7                       | NM_130888                  | ref Mus musculus nuclear RNA export factor 7 (Nxf7), mRNA [NM_130888]                                                                                      | 0.40                  | 0.010   | 0.747           |
| chr9:51905865-51911474_R   | chr9:51905865-51911474_R   | lincRNA:chr9:51905865-51911474 reverse strand                                                                                                              | 0.40                  | 0.026   | 0.973           |
| Vmn2r5                     | NM_001104618               | ref Mus musculus vomeronasal 2, receptor 5 (Vmn2r5), mRNA [NM_001104618]                                                                                   | 0.40                  | 0.015   | 0.831           |
| chr17:17315025-17460175_R  | chr17:17315025-17460175_R  | lincRNA:chr17:17315025-17460175 reverse strand                                                                                                             | 0.40                  | 0.012   | 0.786           |
| Olfir564                   | NM_146359                  | ref Mus musculus olfactory receptor 564 (Olfir564), mRNA [NM_146359]                                                                                       | 0.40                  | 0.046   | 1.000           |
| chr9:89167172-89168980_F   | chr9:89167172-89168980_F   | lincRNA:chr9:89167172-89168980 forward strand                                                                                                              | 0.40                  | 0.048   | 1.000           |
| chr1:167802183-167805411_F | chr1:167802183-167805411_F | lincRNA:chr1:167802183-167805411 forward strand                                                                                                            | 0.40                  | 0.047   | 1.000           |
| chr8:26212577-26218527_R   | chr8:26212577-26218527_R   | lincRNA:chr8:26212577-26218527 reverse strand                                                                                                              | 0.39                  | 0.049   | 1.000           |
| Scarf1                     | NM_001004157               | ref Mus musculus scavenger receptor class F, member 1 (Scarf1), mRNA [NM_001004157]                                                                        | 0.39                  | 0.021   | 0.904           |
| ENSMUST00000118036         | ENSMUST00000118036         | ens transmembrane emp24 protein transport domain containing 5 Gene [Source:MGI (curated);Acc:MGI:1921586] [ENSMUST00000118036]                             | 0.39                  | 0.022   | 0.921           |
| Arrdc4                     | NM_001042592               | ref Mus musculus arrestin domain containing 4 (Arrdc4), transcript variant 1, mRNA [NM_001042592]                                                          | 0.39                  | 0.002   | 0.343           |
| Fam83a                     | NM_173862                  | ref Mus musculus family with sequence similarity 83, member A (Fam83a), mRNA [NM_173862]                                                                   | 0.39                  | 0.018   | 0.865           |
| ENSMUST0000011270          | ENSMUST0000011270          | ens RIKEN cDNA 4631405J19 gene Gene [Source:MGI Symbol;Acc:MGI:3045383] [ENSMUST0000011270]                                                                | 0.39                  | 0.011   | 0.770           |
| 1810041L15Rik              | NM_001163145               | ref Mus musculus RIKEN cDNA 1810041L15 gene (1810041L15Rik), mRNA [NM_001163145]                                                                           | 0.39                  | 0.019   | 0.881           |
| chr18:75448313-75456983_R  | chr18:75448313-75456983_R  | lincRNA:chr18:75448313-75456983 reverse strand                                                                                                             | 0.39                  | 0.007   | 0.664           |
| G0s2                       | NM_008059                  | ref Mus musculus G0/G1 switch gene 2 (G0s2), mRNA [NM_008059]                                                                                              | 0.39                  | 0.030   | 0.998           |
| F830223B06Rik              | AK157552                   | gb Mus musculus activated spleen cDNA, RIKEN full-length enriched library, clone:F830223B06 product:hypothetical protein, full insert sequence. [AK157552] | 0.39                  | 0.006   | 0.624           |
| Ntrk1                      | NM_001033124               | ref Mus musculus neurotrophic tyrosine kinase, receptor, type 1 (Ntrk1), mRNA [NM_001033124]                                                               | 0.39                  | 0.013   | 0.793           |
| chr4:114627748-114632898_F | chr4:114627748-114632898_F | lincRNA:chr4:114627748-114632898 forward strand                                                                                                            | 0.39                  | 0.007   | 0.676           |
| chr5:119945358-119962612_F | chr5:119945358-119962612_F | lincRNA:chr5:119945358-119962612 forward strand                                                                                                            | 0.38                  | 0.006   | 0.624           |
| Aars                       | NM_146217                  | ref Mus musculus alanyl-tRNA synthetase (Aars), mRNA [NM_146217]                                                                                           | 0.38                  | 0.014   | 0.825           |
| ENSMUST00000088320         | ENSMUST00000088320         | ens brain-specific angiogenesis inhibitor 3 Gene [Source:MGI (curated);Acc:MGI:2441837] [ENSMUST00000088320]                                               | 0.38                  | 0.040   | 1.000           |
| Gm13939                    | NR_033473                  | ref Mus musculus predicted gene 13939 (Gm13939), non-coding RNA [NR_033473]                                                                                | 0.38                  | 0.032   | 1.000           |
| Rap1gap                    | NM_001081155               | ref Mus musculus Rap1 GTPase-activating protein (Rap1gap), mRNA [NM_001081155]                                                                             | 0.38                  | 0.019   | 0.883           |
| chr5:120269342-120279542_R | chr5:120269342-120279542_R | lincRNA:chr5:120269342-120279542 reverse strand                                                                                                            | 0.38                  | 0.002   | 0.385           |
| ENSMUST00000050584         | ENSMUST00000050584         | ens RIKEN cDNA 0610010O12 gene Gene [Source:MGI Symbol;Acc:MGI:1913310] [ENSMUST00000050584]                                                               | 0.38                  | 0.033   | 1.000           |

Online Supplemental Table IV: mG4H-Veh Only

| Gene Symbol               | RefSeq                    | Description                                                                                                                            | logFC<br>mG4H-<br>Veh | P-value | Adj.<br>P-value |
|---------------------------|---------------------------|----------------------------------------------------------------------------------------------------------------------------------------|-----------------------|---------|-----------------|
| chr6:3283191-3284581_R    | chr6:3283191-3284581_R    | lincRNA:chr6:3283191-3284581 reverse strand                                                                                            | 0.38                  | 0.011   | 0.774           |
| ENSMUST00000097515        | ENSMUST00000097515        | ens RIKEN cDNA F830208F22 gene Gene [Source:MGI Symbol;Acc:MGI:3588261] [ENSMUST00000097515]                                           | 0.38                  | 0.031   | 1.000           |
| Ttyh2                     | NM_053273                 | ref Mus musculus tweety homolog 2 (Drosophila) (Ttyh2), mRNA [NM_053273]                                                               | 0.38                  | 0.048   | 1.000           |
| Gm4077                    | XM_001478945              | ref PREDICTED: Mus musculus similar to retinitis pigmentosa GTPase regulator interacting protein 1 (LOC100042863), mRNA [XM_001478945] | 0.38                  | 0.028   | 0.983           |
| Spsb4                     | NM_145134                 | ref Mus musculus splanchnic/ryanodine receptor domain and SOCS box containing 4 (Spsb4), mRNA [NM_145134]                              | 0.38                  | 0.045   | 1.000           |
| chr17:6817346-6819981_F   | chr17:6817346-6819981_F   | lincRNA:chr17:6817346-6819981 forward strand                                                                                           | 0.38                  | 0.025   | 0.966           |
| Zbp1                      | NM_021394                 | ref Mus musculus Z-DNA binding protein 1 (Zbp1), transcript variant 1, mRNA [NM_021394]                                                | 0.38                  | 0.024   | 0.957           |
| ENSMUST00000115074        | ENSMUST00000115074        | ens ATP-binding cassette, sub-family B (MDR/TAP), member 8 Gene [Source:MGI (curated);Acc:MGI:1351667] [ENSMUST00000115074]            | 0.38                  | 0.003   | 0.457           |
| Slc17a4                   | NM_177016                 | ref Mus musculus solute carrier family 17 (sodium phosphate), member 4 (Slc17a4), mRNA [NM_177016]                                     | 0.37                  | 0.028   | 0.983           |
| Arhgap11a                 | NM_181416                 | ref Mus musculus Rho GTPase activating protein 11A (Arhgap11a), mRNA [NM_181416]                                                       | 0.37                  | 0.044   | 1.000           |
| Olf117                    | NM_207155                 | ref Mus musculus olfactory receptor 117 (Olf117), mRNA [NM_207155]                                                                     | 0.37                  | 0.005   | 0.606           |
| AW125646                  | AW125646                  | gb UI-M-BH2.2-aqi-a-12-0-UI.s1 NIH_BMAP_M_S3.2 Mus musculus cDNA clone UI-M-BH2.2-aqi-a-12-0-UI 3'. [AW125646]                         | 0.37                  | 0.034   | 1.000           |
| Pnma2                     | NM_175498                 | ref Mus musculus paraneoplastic antigen MA2 (Pnma2), mRNA [NM_175498]                                                                  | 0.37                  | 0.017   | 0.858           |
| 4930550L24Rik             | NM_023774                 | ref Mus musculus RIKEN cDNA 4930550L24 gene (4930550L24Rik), mRNA [NM_023774]                                                          | 0.37                  | 0.010   | 0.764           |
| Fam78b                    | NM_001160262              | ref Mus musculus family with sequence similarity 78, member B (Fam78b), transcript variant 1, mRNA [NM_001160262]                      | 0.37                  | 0.047   | 1.000           |
| chr9:41213456-41340170_R  | chr9:41213456-41340170_R  | lincRNA:chr9:41213456-41340170 reverse strand                                                                                          | 0.37                  | 0.042   | 1.000           |
| Egr1                      | NM_007913                 | ref Mus musculus early growth response 1 (Egr1), mRNA [NM_007913]                                                                      | 0.37                  | 0.032   | 1.000           |
| chr19:59498190-59531390_R | chr19:59498190-59531390_R | lincRNA:chr19:59498190-59531390 reverse strand                                                                                         | 0.37                  | 0.047   | 1.000           |
| ENSMUST00000107861        | ENSMUST00000107861        | ens carbonic anhydrase 10 Gene [Source:MGI (curated);Acc:MGI:1919855] [ENSMUST00000107861]                                             | 0.36                  | 0.019   | 0.882           |
| ENSMUST00000110244        | ENSMUST00000110244        | ens exostoses (multiple) 1 Gene [Source:MGI (curated);Acc:MGI:894663] [ENSMUST00000110244]                                             | 0.36                  | 0.041   | 1.000           |
| chr17:5795893-5835243_R   | chr17:5795893-5835243_R   | lincRNA:chr17:5795893-5835243 reverse strand                                                                                           | 0.36                  | 0.013   | 0.802           |
| Sh3gl3                    | NM_017400                 | ref Mus musculus SH3-domain GRB2-like 3 (Sh3gl3), mRNA [NM_017400]                                                                     | 0.36                  | 0.010   | 0.746           |
| Irx5                      | NM_018826                 | ref Mus musculus Iroquois related homeobox 5 (Drosophila) (Irx5), mRNA [NM_018826]                                                     | 0.36                  | 0.042   | 1.000           |
| 3830431G21Rik             | NM_001177503              | ref Mus musculus RIKEN cDNA 3830431G21 gene (3830431G21Rik), mRNA [NM_001177503]                                                       | 0.36                  | 0.049   | 1.000           |
| Gm8286                    | XM_001478140              | ref PREDICTED: Mus musculus predicted gene, EG666784 (EG666784), mRNA [XM_001478140]                                                   | 0.36                  | 0.013   | 0.802           |
| chr13:34186976-34210579_F | chr13:34186976-34210579_F | lincRNA:chr13:34186976-34210579 forward strand                                                                                         | 0.36                  | 0.015   | 0.830           |
| Opn3                      | NM_010098                 | ref Mus musculus opsin 3 (Opn3), mRNA [NM_010098]                                                                                      | 0.36                  | 0.013   | 0.793           |
| chr8:74439200-74441363_F  | chr8:74439200-74441363_F  | lincRNA:chr8:74439200-74441363 forward strand                                                                                          | 0.36                  | 0.033   | 1.000           |

Online Supplemental Table IV: mG4H-Veh Only

| Gene Symbol                | RefSeq                     | Description                                                                                                                                                        | logFC<br>mG4H-<br>Veh | P-value | Adj.<br>P-value |
|----------------------------|----------------------------|--------------------------------------------------------------------------------------------------------------------------------------------------------------------|-----------------------|---------|-----------------|
| Lamb3                      | NM_008484                  | ref Mus musculus laminin, beta 3 (Lamb3), mRNA [NM_008484]                                                                                                         | 0.36                  | 0.025   | 0.958           |
| ENSMUST00000098237         | ENSMUST00000098237         | ens RIKEN cDNA 3200002M19 gene Gene [Source:MGI Symbol;Acc:MGI:1922680] [ENSMUST00000098237]                                                                       | 0.36                  | 0.016   | 0.848           |
| chr10:81165750-81236400_F  | chr10:81165750-81236400_F  | lincRNA:chr10:81165750-81236400 forward strand                                                                                                                     | 0.36                  | 0.047   | 1.000           |
| ENSMUST00000119373         | ENSMUST00000119373         | ens GRAM domain containing 1B Gene [Source:MGI (curated);Acc:MGI:1925037] [ENSMUST00000119373]                                                                     | 0.36                  | 0.003   | 0.459           |
| D030062011Rik              | AK141776                   | gb Mus musculus 9 days embryo whole body cDNA, RIKEN full-length enriched library, clone:D030062011 product:hypothetical protein, full insert sequence. [AK141776] | 0.36                  | 0.043   | 1.000           |
| Il18rap                    | NM_010553                  | ref Mus musculus interleukin 18 receptor accessory protein (Il18rap), mRNA [NM_010553]                                                                             | 0.36                  | 0.017   | 0.858           |
| chr5:107503800-107515575_R | chr5:107503800-107515575_R | lincRNA:chr5:107503800-107515575 reverse strand                                                                                                                    | 0.36                  | 0.037   | 1.000           |
| Zc3h8                      | NM_020594                  | ref Mus musculus zinc finger CCCH type containing 8 (Zc3h8), mRNA [NM_020594]                                                                                      | 0.36                  | 0.008   | 0.708           |
| chr16:25059724-25069144_F  | chr16:25059724-25069144_F  | lincRNA:chr16:25059724-25069144 forward strand                                                                                                                     | 0.36                  | 0.009   | 0.737           |
| Wfdc6b                     | NM_001012725               | ref Mus musculus WAP four-disulfide core domain 6B (Wfdc6b), mRNA [NM_001012725]                                                                                   | 0.36                  | 0.013   | 0.802           |
| 4930419G24Rik              | AK039415                   | gb Mus musculus adult male spinal cord cDNA, RIKEN full-length enriched library, clone:A330041C21 product:unclassifiable, full insert sequence. [AK039415]         | 0.36                  | 0.048   | 1.000           |
| Tmem20                     | NM_175507                  | ref Mus musculus transmembrane protein 20 (Tmem20), mRNA [NM_175507]                                                                                               | 0.35                  | 0.018   | 0.865           |
| chr17:15357376-15385701_F  | chr17:15357376-15385701_F  | lincRNA:chr17:15357376-15385701 forward strand                                                                                                                     | 0.35                  | 0.029   | 0.986           |
| Naa50                      | NM_028108                  | ref Mus musculus N(alpha)-acetyltransferase 50, NatE catalytic subunit (Naa50), mRNA [NM_028108]                                                                   | 0.35                  | 0.019   | 0.881           |
| 1700060J05Rik              | AK164818                   | gb Mus musculus 16 days neonate heart cDNA, RIKEN full-length enriched library, clone:D830045F20 product:unclassifiable, full insert sequence. [AK164818]          | 0.35                  | 0.034   | 1.000           |
| Rsph10b2                   | XM_205565                  | ref PREDICTED: Mus musculus RIKEN cDNA 4930526H21 gene, transcript variant 1 (4930526H21Rik), mRNA [XM_205565]                                                     | 0.35                  | 0.021   | 0.904           |
| chr17:21787577-21828406_F  | chr17:21787577-21828406_F  | lincRNA:chr17:21787577-21828406 forward strand                                                                                                                     | 0.35                  | 0.024   | 0.957           |
| Utp18                      | NM_001013375               | ref Mus musculus UTP18, small subunit (SSU) processome component, homolog (yeast) (Utp18), mRNA [NM_001013375]                                                     | 0.35                  | 0.009   | 0.720           |
| LOC100048765               | XM_001481200               | ref PREDICTED: Mus musculus similar to steroid sulfatase (LOC100048765), mRNA [XM_001481200]                                                                       | 0.35                  | 0.004   | 0.516           |
| chr3:143541356-143617738_R | chr3:143541356-143617738_R | lincRNA:chr3:143541356-143617738 reverse strand                                                                                                                    | 0.35                  | 0.047   | 1.000           |
| chr9:96670035-96682896_F   | chr9:96670035-96682896_F   | lincRNA:chr9:96670035-96682896 forward strand                                                                                                                      | 0.35                  | 0.022   | 0.935           |
| chr12:52950465-52950990_R  | chr12:52950465-52950990_R  | lincRNA:chr12:52950465-52950990 reverse strand                                                                                                                     | 0.35                  | 0.039   | 1.000           |
| ENSMUST00000064804         | ENSMUST00000064804         | ens MCG148073Putative uncharacterized protein ; [Source:UniProtKB/TrEMBL;Acc:Q8C3B6] [ENSMUST00000064804]                                                          | 0.34                  | 0.031   | 0.998           |
| Gm11214                    | XR_031348                  | ref PREDICTED: Mus musculus similar to glyceraldehyde-3-phosphate dehydrogenase (LOC667451), misc RNA [XR_031348]                                                  | 0.34                  | 0.010   | 0.756           |
| chr2:48826955-48827592_F   | chr2:48826955-48827592_F   | lincRNA:chr2:48826955-48827592 forward strand                                                                                                                      | 0.34                  | 0.016   | 0.848           |
| chr19:44651106-44657612_R  | chr19:44651106-44657612_R  | lincRNA:chr19:44651106-44657612 reverse strand                                                                                                                     | 0.34                  | 0.013   | 0.802           |

| Online Supplemental Table IV: mG4H-Veh Only |                            |                                                                                                                                                                                                                 |                       |         |                 |
|---------------------------------------------|----------------------------|-----------------------------------------------------------------------------------------------------------------------------------------------------------------------------------------------------------------|-----------------------|---------|-----------------|
| Gene Symbol                                 | RefSeq                     | Description                                                                                                                                                                                                     | logFC<br>mG4H-<br>Veh | P-value | Adj.<br>P-value |
| chr6:128389484-128403407_R                  | chr6:128389484-128403407_R | lincRNA:chr6:128389484-128403407 reverse strand                                                                                                                                                                 | 0.34                  | 0.036   | 1.000           |
| Myf5                                        | NM_008656                  | ref Mus musculus myogenic factor 5 (Myf5), mRNA [NM_008656]                                                                                                                                                     | 0.34                  | 0.032   | 1.000           |
| chr12:76744947-76778372_F                   | chr12:76744947-76778372_F  | lincRNA:chr12:76744947-76778372 forward strand                                                                                                                                                                  | 0.34                  | 0.038   | 1.000           |
| chrX:54627918-54638568_F                    | chrX:54627918-54638568_F   | lincRNA:chrX:54627918-54638568 forward strand                                                                                                                                                                   | 0.34                  | 0.050   | 1.000           |
| Ucn                                         | NM_021290                  | ref Mus musculus urocortin (Ucn), mRNA [NM_021290]                                                                                                                                                              | 0.34                  | 0.036   | 1.000           |
| Hbb-y                                       | NM_008221                  | ref Mus musculus hemoglobin Y, beta-like embryonic chain (Hbb-y), mRNA [NM_008221]                                                                                                                              | 0.34                  | 0.031   | 0.998           |
| ENSMUST00000089640                          | ENSMUST00000089640         | ens sema domain, seven thrombospondin repeats (type 1 and type 1-like), transmembrane domain (TM) and short cytoplasmic domain, (semaphorin) 5B Gene [Source:MGI (curated);Acc:MGI:107555] [ENSMUST00000089640] | 0.34                  | 0.041   | 1.000           |
| chr12:53669634-53672010_F                   | chr12:53669634-53672010_F  | lincRNA:chr12:53669634-53672010 forward strand                                                                                                                                                                  | 0.33                  | 0.043   | 1.000           |
| chr2:143988645-143993945_R                  | chr2:143988645-143993945_R | lincRNA:chr2:143988645-143993945 reverse strand                                                                                                                                                                 | 0.33                  | 0.012   | 0.793           |
| Vta1                                        | NM_025418                  | ref Mus musculus Vps20-associated 1 homolog (S. cerevisiae) (Vta1), mRNA [NM_025418]                                                                                                                            | 0.33                  | 0.037   | 1.000           |
| ENSMUST00000094445                          | ENSMUST00000094445         | ens RIKEN cDNA 9230110K08 gene Gene [Source:MGI Symbol;Acc:MGI:1925157] [ENSMUST00000094445]                                                                                                                    | 0.33                  | 0.003   | 0.434           |
| chr9:88581073-88614403_R                    | chr9:88581073-88614403_R   | lincRNA:chr9:88581073-88614403 reverse strand                                                                                                                                                                   | 0.33                  | 0.046   | 1.000           |
| Cbx7                                        | NM_144811                  | ref Mus musculus chromobox homolog 7 (Cbx7), mRNA [NM_144811]                                                                                                                                                   | 0.33                  | 0.002   | 0.392           |
| LOC100041834                                | XM_001477085               | ref PREDICTED: Mus musculus hypothetical protein LOC100041834 (LOC100041834), mRNA [XM_001477085]                                                                                                               | 0.33                  | 0.041   | 1.000           |
| Adap1                                       | NM_172723                  | ref Mus musculus ArfGAP with dual PH domains 1 (Adap1), mRNA [NM_172723]                                                                                                                                        | 0.33                  | 0.004   | 0.569           |
| ENSMUST00000055626                          | ENSMUST00000055626         | ens RIKEN cDNA 4930473A06 gene Gene [Source:MGI Symbol;Acc:MGI:1922152] [ENSMUST00000055626]                                                                                                                    | 0.33                  | 0.036   | 1.000           |
| Gm14066                                     | XM_001481030               | ref PREDICTED: Mus musculus hypothetical protein LOC100043792 (LOC100043792), mRNA [XM_001481030]                                                                                                               | 0.33                  | 0.017   | 0.854           |
| chr1:134867906-134885481_R                  | chr1:134867906-134885481_R | lincRNA:chr1:134867906-134885481 reverse strand                                                                                                                                                                 | 0.33                  | 0.048   | 1.000           |
| Kcng4                                       | NM_025734                  | ref Mus musculus potassium voltage-gated channel, subfamily G, member 4 (Kcng4), mRNA [NM_025734]                                                                                                               | 0.33                  | 0.011   | 0.773           |
| Rps2-ps9                                    | XR_002050                  | ref PREDICTED: Mus musculus predicted gene, EG666682 (EG666682), misc RNA [XR_002050]                                                                                                                           | 0.33                  | 0.038   | 1.000           |
| ENSMUST00000114998                          | ENSMUST00000114998         | ens X-prolyl aminopeptidase (aminopeptidase P) 2, membrane-bound Gene [Source:MGI (curated);Acc:MGI:2180001] [ENSMUST00000114998]                                                                               | 0.33                  | 0.034   | 1.000           |
| chr6:4841700-4847400_F                      | chr6:4841700-4847400_F     | lincRNA:chr6:4841700-4847400 forward strand                                                                                                                                                                     | 0.33                  | 0.037   | 1.000           |
| Gzmb                                        | NM_013542                  | ref Mus musculus granzyme B (Gzmb), mRNA [NM_013542]                                                                                                                                                            | 0.33                  | 0.044   | 1.000           |
| Zdhhc8                                      | NM_172151                  | ref Mus musculus zinc finger, DHHC domain containing 8 (Zdhhc8), mRNA [NM_172151]                                                                                                                               | 0.33                  | 0.002   | 0.346           |
| chr6:82608223-82669023_R                    | chr6:82608223-82669023_R   | lincRNA:chr6:82608223-82669023 reverse strand                                                                                                                                                                   | 0.33                  | 0.046   | 1.000           |
| chr10:81589292-81626369_R                   | chr10:81589292-81626369_R  | lincRNA:chr10:81589292-81626369 reverse strand                                                                                                                                                                  | 0.33                  | 0.017   | 0.854           |
| Msx3                                        | NM_010836                  | ref Mus musculus homeobox, msh-like 3 (Msx3), mRNA [NM_010836]                                                                                                                                                  | 0.33                  | 0.049   | 1.000           |



| Online Supplemental Table IV: mG4H-Veh Only |                           |                                                                                                                                 |                       |         |                 |
|---------------------------------------------|---------------------------|---------------------------------------------------------------------------------------------------------------------------------|-----------------------|---------|-----------------|
| Gene Symbol                                 | RefSeq                    | Description                                                                                                                     | logFC<br>mG4H-<br>Veh | P-value | Adj.<br>P-value |
| <b>Cabp1</b>                                | NM_013879                 | ref Mus musculus calcium binding protein 1 (Cabp1), mRNA [NM_013879]                                                            | 0.33                  | 0.027   | 0.983           |
| <b>chr10:33709588-33712046_R</b>            | chr10:33709588-33712046_R | lincRNA:chr10:33709588-33712046 reverse strand                                                                                  | 0.33                  | 0.013   | 0.812           |
| <b>chr17:27012442-27024356_F</b>            | chr17:27012442-27024356_F | lincRNA:chr17:27012442-27024356 forward strand                                                                                  | 0.32                  | 0.050   | 1.000           |
| <b>Fgf14</b>                                | NM_010201                 | ref Mus musculus fibroblast growth factor 14 (Fgf14), transcript variant 1, mRNA [NM_010201]                                    | 0.32                  | 0.036   | 1.000           |
| <b>Dusp8</b>                                | NM_008748                 | ref Mus musculus dual specificity phosphatase 8 (Dusp8), mRNA [NM_008748]                                                       | 0.32                  | 0.011   | 0.766           |
| <b>Dact3</b>                                | NM_001081655              | ref Mus musculus dapper homolog 3, antagonist of beta-catenin (xenopus) (Dact3), mRNA [NM_001081655]                            | 0.32                  | 0.025   | 0.968           |
| <b>Polr3g</b>                               | NM_001081176              | ref Mus musculus polymerase (RNA) III (DNA directed) polypeptide G (Polr3g), mRNA [NM_001081176]                                | 0.32                  | 0.005   | 0.621           |
| <b>Bhlhe41</b>                              | NM_024469                 | ref Mus musculus basic helix-loop-helix family, member e41 (Bhlhe41), mRNA [NM_024469]                                          | 0.32                  | 0.031   | 0.998           |
| <b>chr1:82892851-82943201_R</b>             | chr1:82892851-82943201_R  | lincRNA:chr1:82892851-82943201 reverse strand                                                                                   | 0.32                  | 0.043   | 1.000           |
| <b>Gm4056</b>                               | XM_001478913              | ref PREDICTED: Mus musculus similar to Paraneoplastic antigen MA2 (LOC100042835), mRNA [XM_001478913]                           | 0.32                  | 0.047   | 1.000           |
| <b>Lck</b>                                  | NM_010693                 | ref Mus musculus lymphocyte protein tyrosine kinase (Lck), transcript variant 2, mRNA [NM_010693]                               | 0.32                  | 0.043   | 1.000           |
| <b>Eif2c3</b>                               | NM_153402                 | ref Mus musculus eukaryotic translation initiation factor 2C, 3 (Eif2c3), mRNA [NM_153402]                                      | 0.31                  | 0.045   | 1.000           |
| <b>Bmpr1a</b>                               | NM_009758                 | ref Mus musculus bone morphogenetic protein receptor, type 1A (Bmpr1a), mRNA [NM_009758]                                        | 0.31                  | 0.001   | 0.215           |
| <b>chr8:27129927-27137444_F</b>             | chr8:27129927-27137444_F  | lincRNA:chr8:27129927-27137444 forward strand                                                                                   | 0.31                  | 0.008   | 0.708           |
| <b>Hsh2d</b>                                | NM_197944                 | ref Mus musculus hematopoietic SH2 domain containing (Hsh2d), mRNA [NM_197944]                                                  | 0.31                  | 0.047   | 1.000           |
| <b>4930589O11Rik</b>                        | XM_899432                 | ref PREDICTED: Mus musculus RIKEN cDNA 4930589O11 gene (4930589O11Rik), mRNA [XM_899432]                                        | 0.31                  | 0.044   | 1.000           |
| <b>Gm7129</b>                               | XR_031903                 | ref PREDICTED: Mus musculus similar to Glyceraldehyde-3-phosphate dehydrogenase (GAPDH) (LOC634019), misc RNA [XR_031903]       | 0.31                  | 0.002   | 0.357           |
| <b>Gm6981</b>                               | NR_023357                 | ref Mus musculus predicted pseudogene 6981 (Gm6981), non-coding RNA [NR_023357]                                                 | 0.31                  | 0.012   | 0.789           |
| <b>Zfhx2</b>                                | NM_001039198              | ref Mus musculus zinc finger homeobox 2 (Zfhx2), mRNA [NM_001039198]                                                            | 0.31                  | 0.047   | 1.000           |
| <b>Rap1gap</b>                              | NM_001081155              | ref Mus musculus Rap1 GTPase-activating protein (Rap1gap), mRNA [NM_001081155]                                                  | 0.31                  | 0.050   | 1.000           |
| <b>chr1:36012298-36020311_R</b>             | chr1:36012298-36020311_R  | lincRNA:chr1:36012298-36020311 reverse strand                                                                                   | 0.31                  | 0.049   | 1.000           |
| <b>Ralgapa2</b>                             | ENSMUST00000109986        | ens Ral GTPase activating protein, alpha subunit 2 (catalytic) Gene [Source:MGI (curated);Acc:MGI:3036245] [ENSMUST00000109986] | 0.30                  | 0.020   | 0.885           |
| <b>Slc30a10</b>                             | NM_001033286              | ref Mus musculus solute carrier family 30, member 10 (Slc30a10), mRNA [NM_001033286]                                            | 0.30                  | 0.043   | 1.000           |
| <b>Ttc9b</b>                                | NM_028417                 | ref Mus musculus tetratricopeptide repeat domain 9B (Ttc9b), mRNA [NM_028417]                                                   | 0.30                  | 0.038   | 1.000           |
| <b>chr18:35973241-35973632_F</b>            | chr18:35973241-35973632_F | lincRNA:chr18:35973241-35973632 forward strand                                                                                  | 0.30                  | 0.019   | 0.883           |
| <b>Slmo1</b>                                | NM_144867                 | ref Mus musculus slowmo homolog 1 (Drosophila) (Slmo1), mRNA [NM_144867]                                                        | 0.30                  | 0.030   | 0.998           |
| <b>ENSMUST00000084298</b>                   | ENSMUST00000084298        | ens RIKEN cDNA 2610044O15 gene Gene [Source:MGI Symbol;Acc:MGI:1919389] [ENSMUST00000084298]                                    | 0.30                  | 0.007   | 0.672           |

Online Supplemental Table IV: mG4H-Veh Only

| Gene Symbol                | RefSeq                     | Description                                                                                                                                                    | logFC<br>mG4H-<br>Veh | P-value | Adj.<br>P-value |
|----------------------------|----------------------------|----------------------------------------------------------------------------------------------------------------------------------------------------------------|-----------------------|---------|-----------------|
| chr1:153685487-153710962_F | chr1:153685487-153710962_F | lincRNA:chr1:153685487-153710962 forward strand                                                                                                                | 0.30                  | 0.047   | 1.000           |
| chr17:32213375-32238425_F  | chr17:32213375-32238425_F  | lincRNA:chr17:32213375-32238425 forward strand                                                                                                                 | 0.30                  | 0.050   | 1.000           |
| chr3:21964899-21974885_F   | chr3:21964899-21974885_F   | lincRNA:chr3:21964899-21974885 forward strand                                                                                                                  | 0.30                  | 0.034   | 1.000           |
| Gipr                       | NM_001080815               | ref Mus musculus gastric inhibitory polypeptide receptor (Gipr), mRNA [NM_001080815]                                                                           | 0.30                  | 0.030   | 0.994           |
| Myo19                      | NM_025414                  | ref Mus musculus myosin XIX (Myo19), mRNA [NM_025414]                                                                                                          | 0.30                  | 0.025   | 0.970           |
| Klrc3                      | NM_021378                  | ref Mus musculus killer cell lectin-like receptor subfamily C, member 3 (Klrc3), mRNA [NM_021378]                                                              | 0.30                  | 0.041   | 1.000           |
| Usp35                      | NM_001177412               | ref Mus musculus ubiquitin specific peptidase 35 (Usp35), mRNA [NM_001177412]                                                                                  | 0.29                  | 0.034   | 1.000           |
| chr1:92412246-92423471_R   | chr1:92412246-92423471_R   | lincRNA:chr1:92412246-92423471 reverse strand                                                                                                                  | 0.29                  | 0.024   | 0.957           |
| Trim16                     | NM_053169                  | ref Mus musculus tripartite motif-containing 16 (Trim16), mRNA [NM_053169]                                                                                     | 0.29                  | 0.030   | 0.998           |
| 1700024P04Rik              | NM_027064                  | ref Mus musculus RIKEN cDNA 1700024P04 gene (1700024P04Rik), mRNA [NM_027064]                                                                                  | 0.29                  | 0.046   | 1.000           |
| chr17:88890039-88905680_F  | chr17:88890039-88905680_F  | lincRNA:chr17:88890039-88905680 forward strand                                                                                                                 | 0.29                  | 0.023   | 0.935           |
| Clec4g                     | NM_029465                  | ref Mus musculus C-type lectin domain family 4, member g (Clec4g), mRNA [NM_029465]                                                                            | 0.29                  | 0.036   | 1.000           |
| chr14:44284425-44300475_F  | chr14:44284425-44300475_F  | lincRNA:chr14:44284425-44300475 forward strand                                                                                                                 | 0.29                  | 0.017   | 0.858           |
| chr5:143676800-143704125_F | chr5:143676800-143704125_F | lincRNA:chr5:143676800-143704125 forward strand                                                                                                                | 0.29                  | 0.048   | 1.000           |
| Dnmbp                      | NM_028029                  | ref Mus musculus dynamin binding protein (Dnmbp), mRNA [NM_028029]                                                                                             | 0.29                  | 0.034   | 1.000           |
| Tomm70a                    | ENSMUST00000023433         | ens translocase of outer mitochondrial membrane 70 homolog A (yeast) Gene [Source:MGI Symbol;Acc:MGI:106295] [ENSMUST00000023433]                              | 0.29                  | 0.032   | 1.000           |
| Lgr5                       | NM_010195                  | ref Mus musculus leucine rich repeat containing G protein coupled receptor 5 (Lgr5), mRNA [NM_010195]                                                          | 0.29                  | 0.040   | 1.000           |
| chr5:26323150-26357875_R   | chr5:26323150-26357875_R   | lincRNA:chr5:26323150-26357875 reverse strand                                                                                                                  | 0.29                  | 0.046   | 1.000           |
| Chrng                      | NM_009604                  | ref Mus musculus cholinergic receptor, nicotinic, gamma polypeptide (Chrng), mRNA [NM_009604]                                                                  | 0.29                  | 0.008   | 0.708           |
| Xk                         | NM_023500                  | ref Mus musculus Kell blood group precursor (McLeod phenotype) homolog (Xk), mRNA [NM_023500]                                                                  | 0.29                  | 0.001   | 0.287           |
| Pkdcc                      | NM_134117                  | ref Mus musculus protein kinase domain containing, cytoplasmic (Pkdcc), mRNA [NM_134117]                                                                       | 0.29                  | 0.010   | 0.762           |
| chr15:92174226-92201201_F  | chr15:92174226-92201201_F  | lincRNA:chr15:92174226-92201201 forward strand                                                                                                                 | 0.28                  | 0.021   | 0.916           |
| Gm5142                     | NM_001004158               | ref Mus musculus predicted gene 5142 (Gm5142), mRNA [NM_001004158]                                                                                             | 0.28                  | 0.048   | 1.000           |
| Slc25a12                   | NM_172436                  | ref Mus musculus solute carrier family 25 (mitochondrial carrier, Aralar), member 12 (Slc25a12), nuclear gene encoding mitochondrial protein, mRNA [NM_172436] | 0.28                  | 0.003   | 0.439           |
| chr6:131263850-131314850_F | chr6:131263850-131314850_F | lincRNA:chr6:131263850-131314850 forward strand                                                                                                                | 0.28                  | 0.034   | 1.000           |
| chr13:94180737-94182912_F  | chr13:94180737-94182912_F  | lincRNA:chr13:94180737-94182912 forward strand                                                                                                                 | 0.28                  | 0.002   | 0.395           |
| Gm11517                    | NR_033523                  | ref Mus musculus predicted gene 11517 (Gm11517), non-coding RNA [NR_033523]                                                                                    | 0.28                  | 0.047   | 1.000           |
| chr18:82862340-82875566_F  | chr18:82862340-82875566_F  | lincRNA:chr18:82862340-82875566 forward strand                                                                                                                 | 0.28                  | 0.035   | 1.000           |

Online Supplemental Table IV: mG4H-Veh Only

| Gene Symbol                        | RefSeq                      | Description                                                                                                                                           | logFC<br>mG4H-<br>Veh | P-value | Adj.<br>P-value |
|------------------------------------|-----------------------------|-------------------------------------------------------------------------------------------------------------------------------------------------------|-----------------------|---------|-----------------|
| <b>Mrm1</b>                        | NM_145433                   | ref Mus musculus mitochondrial rRNA methyltransferase 1 homolog (S. cerevisiae) (Mrm1), nuclear gene encoding mitochondrial protein, mRNA [NM_145433] | 0.28                  | 0.008   | 0.694           |
| <b>chr13:54399275-54445825_R</b>   | chr13:54399275-54445825_R   | lincRNA:chr13:54399275-54445825 reverse strand                                                                                                        | 0.28                  | 0.045   | 1.000           |
| <b>chr12:106566735-106624460_R</b> | chr12:106566735-106624460_R | lincRNA:chr12:106566735-106624460 reverse strand                                                                                                      | 0.28                  | 0.043   | 1.000           |
| <b>chr15:77575125-77585575_F</b>   | chr15:77575125-77585575_F   | lincRNA:chr15:77575125-77585575 forward strand                                                                                                        | 0.28                  | 0.040   | 1.000           |
| <b>2010300C02Rik</b>               | NM_028096                   | ref Mus musculus RIKEN cDNA 2010300C02 gene (2010300C02Rik), mRNA [NM_028096]                                                                         | 0.28                  | 0.024   | 0.957           |
| <b>chr17:22916801-22954670_R</b>   | chr17:22916801-22954670_R   | lincRNA:chr17:22916801-22954670 reverse strand                                                                                                        | 0.28                  | 0.045   | 1.000           |
| <b>Sardh</b>                       | NM_138665                   | ref Mus musculus sarcosine dehydrogenase (Sardh), nuclear gene encoding mitochondrial protein, mRNA [NM_138665]                                       | 0.28                  | 0.030   | 0.998           |
| <b>Otop2</b>                       | NM_172801                   | ref Mus musculus otopenin 2 (Otop2), mRNA [NM_172801]                                                                                                 | 0.28                  | 0.033   | 1.000           |
| <b>Tmem39b</b>                     | NM_199305                   | ref Mus musculus transmembrane protein 39b (Tmem39b), mRNA [NM_199305]                                                                                | 0.27                  | 0.017   | 0.854           |
| <b>Gm7765</b>                      | XR_032105                   | ref PREDICTED: Mus musculus similar to glyceraldehyde-3-phosphate dehydrogenase (LOC665743), misc RNA [XR_032105]                                     | 0.27                  | 0.025   | 0.957           |
| <b>Fut4</b>                        | NM_010242                   | ref Mus musculus fucosyltransferase 4 (Fut4), mRNA [NM_010242]                                                                                        | 0.27                  | 0.037   | 1.000           |
| <b>chr1:194659312-194661407_R</b>  | chr1:194659312-194661407_R  | lincRNA:chr1:194659312-194661407 reverse strand                                                                                                       | 0.27                  | 0.041   | 1.000           |
| <b>Cdk18</b>                       | NM_008795                   | ref Mus musculus cyclin-dependent kinase 18 (Cdk18), mRNA [NM_008795]                                                                                 | 0.27                  | 0.005   | 0.621           |
| <b>Dennd2d</b>                     | NM_028110                   | ref Mus musculus DENN/MADD domain containing 2D (Dennd2d), transcript variant 1, mRNA [NM_028110]                                                     | 0.27                  | 0.045   | 1.000           |
| <b>Gm9081</b>                      | XR_030920                   | ref PREDICTED: Mus musculus similar to glyceraldehyde-3-phosphate dehydrogenase (LOC668275), misc RNA [XR_030920]                                     | 0.27                  | 0.010   | 0.747           |
| <b>Slc25a37</b>                    | NM_026331                   | ref Mus musculus solute carrier family 25, member 37 (Slc25a37), nuclear gene encoding mitochondrial protein, mRNA [NM_026331]                        | 0.27                  | 0.045   | 1.000           |
| <b>Arr3</b>                        | NM_133205                   | ref Mus musculus arrestin 3, retinal (Arr3), mRNA [NM_133205]                                                                                         | 0.27                  | 0.043   | 1.000           |
| <b>Ttc37</b>                       | NM_001081352                | ref Mus musculus tetratricopeptide repeat domain 37 (Ttc37), mRNA [NM_001081352]                                                                      | 0.27                  | 0.032   | 1.000           |
| <b>Gm5652</b>                      | XR_034553                   | ref PREDICTED: Mus musculus similar to Glyceraldehyde-3-phosphate dehydrogenase (GAPDH) (LOC435292), misc RNA [XR_034553]                             | 0.27                  | 0.036   | 1.000           |
| <b>Zdhhc3</b>                      | NM_026917                   | ref Mus musculus zinc finger, DHHC domain containing 3 (Zdhhc3), mRNA [NM_026917]                                                                     | 0.27                  | 0.042   | 1.000           |
| <b>chr7:66926500-66952100_F</b>    | chr7:66926500-66952100_F    | lincRNA:chr7:66926500-66952100 forward strand                                                                                                         | 0.27                  | 0.020   | 0.885           |
| <b>Gm6816</b>                      | ENSMUST00000059737          | ref PREDICTED: Mus musculus predicted gene, EG627967 (EG627967), mRNA [XM_892675]                                                                     | 0.27                  | 0.013   | 0.794           |
| <b>chr17:8088950-8106700_F</b>     | chr17:8088950-8106700_F     | lincRNA:chr17:8088950-8106700 forward strand                                                                                                          | 0.27                  | 0.034   | 1.000           |
| <b>Fgf9</b>                        | NM_013518                   | ref Mus musculus fibroblast growth factor 9 (Fgf9), mRNA [NM_013518]                                                                                  | 0.27                  | 0.003   | 0.440           |
| <b>Tbc1d24</b>                     | NM_173186                   | ref Mus musculus TBC1 domain family, member 24 (Tbc1d24), transcript variant 4, mRNA [NM_173186]                                                      | 0.26                  | 0.026   | 0.970           |
| <b>chr5:23195569-23218551_R</b>    | chr5:23195569-23218551_R    | lincRNA:chr5:23195569-23218551 reverse strand                                                                                                         | 0.26                  | 0.037   | 1.000           |
| <b>Efr3a</b>                       | NM_133766                   | ref Mus musculus EFR3 homolog A (S. cerevisiae) (Efr3a), mRNA [NM_133766]                                                                             | 0.26                  | 0.048   | 1.000           |

Online Supplemental Table IV: mG4H-Veh Only

| Gene Symbol                | RefSeq                     | Description                                                                                                                     | logFC<br>mG4H-<br>Veh | P-value | Adj.<br>P-value |
|----------------------------|----------------------------|---------------------------------------------------------------------------------------------------------------------------------|-----------------------|---------|-----------------|
| Mmd                        | ENSMUST000000004050        | ens monocyte to macrophage differentiation-associated Gene [Source:MGI (curated);Acc:MGI:1914718] [ENSMUST000000004050]         | 0.26                  | 0.028   | 0.986           |
| Gm11960                    | XR_032345                  | ref PREDICTED: Mus musculus similar to Glyceraldehyde-3-phosphate dehydrogenase (GAPDH) (LOC100041006), misc RNA [XR_032345]    | 0.26                  | 0.030   | 0.998           |
| Wnk2                       | NM_029361                  | ref Mus musculus WNK lysine deficient protein kinase 2 (Wnk2), mRNA [NM_029361]                                                 | 0.26                  | 0.011   | 0.779           |
| chr8:18895366-18925423_R   | chr8:18895366-18925423_R   | lincRNA:chr8:18895366-18925423 reverse strand                                                                                   | 0.26                  | 0.012   | 0.788           |
| chr14:77006215-77063293_F  | chr14:77006215-77063293_F  | lincRNA:chr14:77006215-77063293 forward strand                                                                                  | 0.26                  | 0.011   | 0.777           |
| 2210020M01Rik              | NM_183259                  | ref Mus musculus RIKEN cDNA 2210020M01 gene (2210020M01Rik), mRNA [NM_183259]                                                   | 0.26                  | 0.011   | 0.766           |
| Gm8570                     | XM_001003594               | ref PREDICTED: Mus musculus predicted gene, EG667314 (EG667314), mRNA [XM_001003594]                                            | 0.26                  | 0.040   | 1.000           |
| chr2:129416848-129417413_R | chr2:129416848-129417413_R | lincRNA:chr2:129416848-129417413 reverse strand                                                                                 | 0.26                  | 0.038   | 1.000           |
| Anks1                      | NM_181413                  | ref Mus musculus ankyrin repeat and SAM domain containing 1 (Anks1), mRNA [NM_181413]                                           | 0.26                  | 0.023   | 0.943           |
| Gm4592                     | XM_001474740               | ref PREDICTED: Mus musculus similar to CG31439-PA (LOC100045682), mRNA [XM_001474740]                                           | 0.26                  | 0.026   | 0.973           |
| Gm10386                    | ENSMUST00000100734         | ens Putative uncharacterized protein Fragment [Source:UniProtKB/TrEMBL;Acc:Q3V0K3] [ENSMUST00000100734]                         | 0.26                  | 0.032   | 1.000           |
| Prrg1                      | NM_027322                  | ref Mus musculus proline rich Gla (G-carboxyglutamic acid) 1 (Prrg1), transcript variant 1, mRNA [NM_027322]                    | 0.26                  | 0.029   | 0.992           |
| Lrp11                      | NM_172784                  | ref Mus musculus low density lipoprotein receptor-related protein 11 (Lrp11), mRNA [NM_172784]                                  | 0.26                  | 0.018   | 0.863           |
| NAP093863-001              | NAP093863-001              | Unknown                                                                                                                         | 0.26                  | 0.009   | 0.719           |
| Gm6498                     | NR_003630                  | ref Mus musculus predicted gene 6498 (Gm6498), non-coding RNA [NR_003630]                                                       | 0.25                  | 0.015   | 0.831           |
| Gm14277                    | XM_001475542               | ref PREDICTED: Mus musculus similar to small nuclear riboprotein Sm-D, transcript variant 2 (LOC100045985), mRNA [XM_001475542] | 0.25                  | 0.027   | 0.976           |
| Luzp1                      | NM_024452                  | ref Mus musculus leucine zipper protein 1 (Luzp1), mRNA [NM_024452]                                                             | 0.25                  | 0.047   | 1.000           |
| chr4:114627748-114632898_R | chr4:114627748-114632898_R | lincRNA:chr4:114627748-114632898 reverse strand                                                                                 | 0.25                  | 0.015   | 0.831           |
| chr2:143992000-143992611_F | chr2:143992000-143992611_F | lincRNA:chr2:143992000-143992611 forward strand                                                                                 | 0.25                  | 0.031   | 1.000           |
| B3gnt4                     | NM_198611                  | ref Mus musculus UDP-GlcNAc:betaGal beta-1,3-N-acetylglucosaminyltransferase 4 (B3gnt4), mRNA [NM_198611]                       | 0.25                  | 0.048   | 1.000           |
| Cyp4f39                    | NM_177307                  | ref Mus musculus cytochrome P450, family 4, subfamily f, polypeptide 39 (Cyp4f39), mRNA [NM_177307]                             | 0.25                  | 0.048   | 1.000           |
| Neu3                       | NM_016720                  | ref Mus musculus neuraminidase 3 (Neu3), mRNA [NM_016720]                                                                       | 0.25                  | 0.039   | 1.000           |
| chr9:46664272-46664689_F   | chr9:46664272-46664689_F   | lincRNA:chr9:46664272-46664689 forward strand                                                                                   | 0.25                  | 0.045   | 1.000           |
| chr2:84427252-84428277_R   | chr2:84427252-84428277_R   | lincRNA:chr2:84427252-84428277 reverse strand                                                                                   | 0.25                  | 0.026   | 0.972           |
| Ankrd33b                   | NM_027496                  | ref Mus musculus ankyrin repeat domain 33B (Ankrd33b), transcript variant 2, mRNA [NM_027496]                                   | 0.25                  | 0.023   | 0.941           |
| Zfp710                     | NM_175433                  | ref Mus musculus zinc finger protein 710 (Zfp710), transcript variant 1, mRNA [NM_175433]                                       | 0.25                  | 0.004   | 0.559           |
| Obfc2b                     | NM_027257                  | ref Mus musculus oligonucleotide/oligosaccharide-binding fold containing 2B (Obfc2b), mRNA [NM_027257]                          | 0.25                  | 0.035   | 1.000           |
| 1700081L11Rik              | NM_001081045               | ref Mus musculus RIKEN cDNA 1700081L11 gene (1700081L11Rik), mRNA [NM_001081045]                                                | 0.25                  | 0.048   | 1.000           |

Online Supplemental Table IV: mG4H-Veh Only

| Gene Symbol                | RefSeq                     | Description                                                                                                                           | logFC<br>mG4H-<br>Veh | P-value | Adj.<br>P-value |
|----------------------------|----------------------------|---------------------------------------------------------------------------------------------------------------------------------------|-----------------------|---------|-----------------|
| Fbxl16                     | NM_001164225               | ref Mus musculus F-box and leucine-rich repeat protein 16 (Fbxl16), mRNA [NM_001164225]                                               | 0.25                  | 0.010   | 0.758           |
| chr3:85589154-85621215_R   | chr3:85589154-85621215_R   | lincRNA:chr3:85589154-85621215 reverse strand                                                                                         | 0.25                  | 0.016   | 0.851           |
| 1700023D19Rik              | NM_029317                  | ref Mus musculus RIKEN cDNA 1700023D19 gene (1700023D19Rik), mRNA [NM_029317]                                                         | 0.24                  | 0.048   | 1.000           |
| Ncl                        | NM_010880                  | ref Mus musculus nucleolin (Ncl), mRNA [NM_010880]                                                                                    | 0.24                  | 0.035   | 1.000           |
| Tns4                       | NM_172564                  | ref Mus musculus tensin 4 (Tns4), mRNA [NM_172564]                                                                                    | 0.24                  | 0.031   | 1.000           |
| ENSMUST00000110374         | ENSMUST00000110374         | ens START domain containing 7 Gene [Source:MGI (curated);Acc:MGI:2139090] [ENSMUST00000110374]                                        | 0.24                  | 0.021   | 0.909           |
| chr11:3538125-3554450_R    | chr11:3538125-3554450_R    | lincRNA:chr11:3538125-3554450 reverse strand                                                                                          | 0.24                  | 0.045   | 1.000           |
| chr17:84470764-84486339_R  | chr17:84470764-84486339_R  | lincRNA:chr17:84470764-84486339 reverse strand                                                                                        | 0.24                  | 0.050   | 1.000           |
| Zfp617                     | NM_133358                  | ref Mus musculus zinc finger protein 617 (Zfp617), mRNA [NM_133358]                                                                   | 0.24                  | 0.019   | 0.883           |
| chr14:77006215-77063293_F  | chr14:77006215-77063293_F  | lincRNA:chr14:77006215-77063293 forward strand                                                                                        | 0.24                  | 0.019   | 0.880           |
| chr7:113768215-113783490_R | chr7:113768215-113783490_R | lincRNA:chr7:113768215-113783490 reverse strand                                                                                       | 0.24                  | 0.031   | 0.999           |
| Pcp4l1                     | NM_025557                  | ref Mus musculus Purkinje cell protein 4-like 1 (Pcp4l1), mRNA [NM_025557]                                                            | 0.24                  | 0.028   | 0.983           |
| Nfic                       | NM_008688                  | ref Mus musculus nuclear factor I/C (Nfic), transcript variant 1, mRNA [NM_008688]                                                    | 0.23                  | 0.004   | 0.538           |
| Trak1                      | NM_175114                  | ref Mus musculus trafficking protein, kinesin binding 1 (Trak1), mRNA [NM_175114]                                                     | 0.23                  | 0.012   | 0.786           |
| chr17:17481706-17482457_R  | chr17:17481706-17482457_R  | lincRNA:chr17:17481706-17482457 reverse strand                                                                                        | 0.23                  | 0.048   | 1.000           |
| Gtf2ird1                   | NM_020331                  | ref Mus musculus general transcription factor II I repeat domain-containing 1 (Gtf2ird1), transcript variant 1, mRNA [NM_020331]      | 0.23                  | 0.027   | 0.983           |
| Mthfsd                     | NM_172761                  | ref Mus musculus methenyltetrahydrofolate synthetase domain containing (Mthfsd), transcript variant 2, mRNA [NM_172761]               | 0.23                  | 0.019   | 0.881           |
| ENSMUST00000068960         | ENSMUST00000068960         | ens RIKEN cDNA D830050J10 gene Gene [Source:MGI Symbol;Acc:MGI:2444203] [ENSMUST00000068960]                                          | 0.23                  | 0.005   | 0.582           |
| Gch1                       | NM_008102                  | ref Mus musculus GTP cyclohydrolase 1 (Gch1), mRNA [NM_008102]                                                                        | 0.23                  | 0.036   | 1.000           |
| Pmm1                       | NM_013872                  | ref Mus musculus phosphomannomutase 1 (Pmm1), mRNA [NM_013872]                                                                        | 0.23                  | 0.042   | 1.000           |
| Pop1                       | NM_152894                  | ref Mus musculus processing of precursor 1, ribonuclease P/MRP family, (S. cerevisiae) (Pop1), transcript variant 1, mRNA [NM_152894] | 0.23                  | 0.016   | 0.848           |
| Ube2d1                     | NM_145420                  | ref Mus musculus ubiquitin-conjugating enzyme E2D 1, UBC4/5 homolog (yeast) (Ube2d1), mRNA [NM_145420]                                | 0.23                  | 0.018   | 0.876           |
| D430042O09Rik              | NM_001081022               | ref Mus musculus RIKEN cDNA D430042O09 gene (D430042O09Rik), mRNA [NM_001081022]                                                      | 0.23                  | 0.017   | 0.854           |
| Ocrl                       | NM_177215                  | ref Mus musculus oculocerebrorenal syndrome of Lowe (Ocrl), mRNA [NM_177215]                                                          | 0.23                  | 0.040   | 1.000           |
| 1190002N15Rik              | NM_001033145               | ref Mus musculus RIKEN cDNA 1190002N15 gene (1190002N15Rik), mRNA [NM_001033145]                                                      | 0.23                  | 0.048   | 1.000           |
| Brwd3                      | NM_001081477               | ref Mus musculus bromodomain and WD repeat domain containing 3 (Brwd3), mRNA [NM_001081477]                                           | 0.23                  | 0.047   | 1.000           |
| Slc39a13                   | NM_026721                  | ref Mus musculus solute carrier family 39 (metal ion transporter), member 13 (Slc39a13), mRNA [NM_026721]                             | 0.23                  | 0.007   | 0.686           |
| BC030336                   | NM_001164580               | ref Mus musculus cDNA sequence BC030336 (BC030336), mRNA [NM_001164580]                                                               | 0.23                  | 0.021   | 0.904           |
| chr5:34696192-34722842_F   | chr5:34696192-34722842_F   | lincRNA:chr5:34696192-34722842 forward strand                                                                                         | 0.23                  | 0.039   | 1.000           |

| Online Supplemental Table IV: mG4H-Veh Only |                             |                                                                                                                                                             |                       |         |                 |
|---------------------------------------------|-----------------------------|-------------------------------------------------------------------------------------------------------------------------------------------------------------|-----------------------|---------|-----------------|
| Gene Symbol                                 | RefSeq                      | Description                                                                                                                                                 | logFC<br>mG4H-<br>Veh | P-value | Adj.<br>P-value |
| Serac1                                      | NM_001111017                | ref Mus musculus serine active site containing 1 (Serac1), transcript variant 3, mRNA [NM_001111017]                                                        | 0.22                  | 0.031   | 0.998           |
| Poc5                                        | NM_026173                   | ref Mus musculus POC5 centriolar protein homolog (Chlamydomonas) (Poc5), mRNA [NM_026173]                                                                   | 0.22                  | 0.026   | 0.970           |
| Wnk2                                        | NM_029361                   | ref Mus musculus WNK lysine deficient protein kinase 2 (Wnk2), mRNA [NM_029361]                                                                             | 0.22                  | 0.013   | 0.799           |
| Kbtbd12                                     | NM_001142724                | ref Mus musculus kelch repeat and BTB (POZ) domain containing 12 (Kbtbd12), transcript variant 1, mRNA [NM_001142724]                                       | 0.22                  | 0.028   | 0.985           |
| LOC637578                                   | XR_034610                   | ref PREDICTED: Mus musculus similar to Chain A, The Solution Structure Of The Ref2-l Mrna Export Factor (Residues 1-155). (LOC637578), misc RNA [XR_034610] | 0.22                  | 0.043   | 1.000           |
| En1                                         | NM_010133                   | ref Mus musculus engrailed 1 (En1), mRNA [NM_010133]                                                                                                        | 0.22                  | 0.016   | 0.848           |
| Ddhd2                                       | NM_028102                   | ref Mus musculus DDHD domain containing 2 (Ddhd2), mRNA [NM_028102]                                                                                         | 0.22                  | 0.007   | 0.683           |
| chr6:50361567-50406200_R                    | chr6:50361567-50406200_R    | lincRNA:chr6:50361567-50406200 reverse strand                                                                                                               | 0.22                  | 0.032   | 1.000           |
| Gpam                                        | NM_008149                   | ref Mus musculus glycerol-3-phosphate acyltransferase, mitochondrial (Gpam), nuclear gene encoding mitochondrial protein, mRNA [NM_008149]                  | 0.22                  | 0.014   | 0.825           |
| chr18:36449530-36456800_R                   | chr18:36449530-36456800_R   | lincRNA:chr18:36449530-36456800 reverse strand                                                                                                              | 0.22                  | 0.045   | 1.000           |
| Gm12247                                     | XR_033143                   | ref PREDICTED: Mus musculus similar to RIKEN cDNA A430005L14 gene (LOC667947), misc RNA [XR_033143]                                                         | 0.22                  | 0.017   | 0.858           |
| AI846148                                    | NM_001033139                | ref Mus musculus expressed sequence AI846148 (AI846148), transcript variant 1, mRNA [NM_001033139]                                                          | 0.22                  | 0.033   | 1.000           |
| chr11:116936834-116948799_R                 | chr11:116936834-116948799_R | lincRNA:chr11:116936834-116948799 reverse strand                                                                                                            | 0.22                  | 0.032   | 1.000           |
| Dysf                                        | NM_001077694                | ref Mus musculus dysferlin (Dysf), transcript variant 2, mRNA [NM_001077694]                                                                                | 0.22                  | 0.023   | 0.943           |
| Tmem135                                     | NM_028343                   | ref Mus musculus transmembrane protein 135 (Tmem135), mRNA [NM_028343]                                                                                      | 0.22                  | 0.024   | 0.957           |
| LOC100047141                                | XM_001477615                | ref PREDICTED: Mus musculus hypothetical protein LOC100047141 (LOC100047141), mRNA [XM_001477615]                                                           | 0.21                  | 0.043   | 1.000           |
| Gm8503                                      | XR_002058                   | ref PREDICTED: Mus musculus predicted gene, EG667190 (EG667190), misc RNA [XR_002058]                                                                       | 0.21                  | 0.038   | 1.000           |
| Hmcn1                                       | NM_001024720                | ref Mus musculus hemicentin 1 (Hmcn1), mRNA [NM_001024720]                                                                                                  | 0.21                  | 0.047   | 1.000           |
| Wnt9a                                       | NM_139298                   | ref Mus musculus wingless-type MMTV integration site 9A (Wnt9a), mRNA [NM_139298]                                                                           | 0.21                  | 0.041   | 1.000           |
| chr17:88993214-89025839_F                   | chr17:88993214-89025839_F   | lincRNA:chr17:88993214-89025839 forward strand                                                                                                              | 0.21                  | 0.033   | 1.000           |
| Gm7520                                      | XR_031035                   | ref PREDICTED: Mus musculus similar to MGC27348 protein (LOC665154), misc RNA [XR_031035]                                                                   | 0.21                  | 0.041   | 1.000           |
| LOC100048247                                | XM_001480121                | ref PREDICTED: Mus musculus similar to polycomb group ring finger 5, transcript variant 2 (LOC100048247), mRNA [XM_001480121]                               | 0.21                  | 0.041   | 1.000           |
| 1810029B16Rik                               | NM_025465                   | ref Mus musculus RIKEN cDNA 1810029B16 gene (1810029B16Rik), mRNA [NM_025465]                                                                               | 0.21                  | 0.015   | 0.830           |
| LOC100048107                                | XR_034253                   | ref PREDICTED: Mus musculus similar to Zfand3 protein (LOC100048107), misc RNA [XR_034253]                                                                  | 0.21                  | 0.022   | 0.920           |
| Stbd1                                       | NM_175096                   | ref Mus musculus starch binding domain 1 (Stbd1), mRNA [NM_175096]                                                                                          | 0.21                  | 0.047   | 1.000           |
| Tfpi                                        | NM_011576                   | ref Mus musculus tissue factor pathway inhibitor (Tfpi), transcript variant 1, mRNA [NM_011576]                                                             | 0.21                  | 0.030   | 0.998           |
| ENSMUST00000071399                          | ENSMUST00000071399          | ens pregnancy specific glycoprotein 16 Gene [Source:MGI (curated);Acc:MGI:1347249] [ENSMUST00000071399]                                                     | 0.21                  | 0.029   | 0.989           |



Online Supplemental Table IV: mG4H-Veh Only

| Gene Symbol               | RefSeq                    | Description                                                                                                                                                                           | logFC<br>mG4H-<br>Veh | P-value | Adj.<br>P-value |
|---------------------------|---------------------------|---------------------------------------------------------------------------------------------------------------------------------------------------------------------------------------|-----------------------|---------|-----------------|
| Scrib                     | NM_134089                 | ref Mus musculus scribbled homolog (Drosophila) (Scrib), mRNA [NM_134089]                                                                                                             | 0.21                  | 0.035   | 1.000           |
| Ptp4a2                    | NM_008974                 | ref Mus musculus protein tyrosine phosphatase 4a2 (Ptp4a2), transcript variant 1, mRNA [NM_008974]                                                                                    | 0.21                  | 0.025   | 0.965           |
| Mga                       | NM_013720                 | ref Mus musculus MAX gene associated (Mga), transcript variant 1, mRNA [NM_013720]                                                                                                    | 0.20                  | 0.043   | 1.000           |
| Slco3a1                   | NM_001038643              | ref Mus musculus solute carrier organic anion transporter family, member 3a1 (Slco3a1), transcript variant 2, mRNA [NM_001038643]                                                     | 0.20                  | 0.030   | 0.998           |
| Bcl2l13                   | NM_153516                 | ref Mus musculus BCL2-like 13 (apoptosis facilitator) (Bcl2l13), nuclear gene encoding mitochondrial protein, mRNA [NM_153516]                                                        | 0.20                  | 0.019   | 0.881           |
| Mthfd2l                   | NM_026788                 | ref Mus musculus methylenetetrahydrofolate dehydrogenase (NADP+ dependent) 2-like (Mthfd2l), mRNA [NM_026788]                                                                         | 0.20                  | 0.018   | 0.865           |
| Bpnt1                     | NM_011794                 | ref Mus musculus bisphosphate 3'-nucleotidase 1 (Bpnt1), mRNA [NM_011794]                                                                                                             | 0.20                  | 0.036   | 1.000           |
| Ints10                    | NM_027590                 | ref Mus musculus integrator complex subunit 10 (Ints10), mRNA [NM_027590]                                                                                                             | 0.20                  | 0.025   | 0.966           |
| Sac3d1                    | NM_133678                 | ref Mus musculus SAC3 domain containing 1 (Sac3d1), mRNA [NM_133678]                                                                                                                  | 0.20                  | 0.018   | 0.869           |
| Tspan9                    | NM_175414                 | ref Mus musculus tetraspanin 9 (Tspan9), mRNA [NM_175414]                                                                                                                             | 0.20                  | 0.043   | 1.000           |
| Mpi                       | NM_025837                 | ref Mus musculus mannose phosphate isomerase (Mpi), mRNA [NM_025837]                                                                                                                  | 0.20                  | 0.016   | 0.848           |
| Efcab4a                   | AK140493                  | gb Mus musculus 10 days neonate cerebellum cDNA, RIKEN full-length enriched library, clone:B930011K17 product:unclassifiable, full insert sequence. [AK140493]                        | 0.20                  | 0.030   | 0.998           |
| 1700093J21Rik             | CB244741                  | gb UI-M-FY0-cdr-d-09-0-UI.r1 NIH_BMAP_FY0 Mus musculus cDNA clone IMAGE: 6833338 5', mRNA sequence [CB244741]                                                                         | 0.20                  | 0.044   | 1.000           |
| Il15ra                    | NM_133836                 | ref Mus musculus interleukin 15 receptor, alpha chain (Il15ra), transcript variant 2, mRNA [NM_133836]                                                                                | 0.20                  | 0.048   | 1.000           |
| Oxa1l                     | NM_026936                 | ref Mus musculus oxidase assembly 1-like (Oxa1l), mRNA [NM_026936]                                                                                                                    | 0.19                  | 0.025   | 0.969           |
| Gm2451                    | XM_001473743              | ref PREDICTED: Mus musculus similar to Glyceraldehyde-3-phosphate dehydrogenase (GAPDH), transcript variant 1 (LOC100039840), mRNA [XM_001473743]                                     | 0.19                  | 0.012   | 0.786           |
| Fbxo10                    | NM_001024142              | ref Mus musculus F-box protein 10 (Fbxo10), mRNA [NM_001024142]                                                                                                                       | 0.19                  | 0.028   | 0.983           |
| Nudt4                     | NM_027722                 | ref Mus musculus nudix (nucleoside diphosphate linked moiety X)-type motif 4 (Nudt4), mRNA [NM_027722]                                                                                | 0.19                  | 0.042   | 1.000           |
| chr13:94180737-94182912_F | chr13:94180737-94182912_F | lincRNA:chr13:94180737-94182912 forward strand                                                                                                                                        | 0.19                  | 0.021   | 0.912           |
| Ibtk                      | NM_001081282              | ref Mus musculus inhibitor of Bruton agammaglobulinemia tyrosine kinase (Ibtk), mRNA [NM_001081282]                                                                                   | 0.19                  | 0.034   | 1.000           |
| Manea                     | NM_172865                 | ref Mus musculus mannosidase, endo-alpha (Manea), mRNA [NM_172865]                                                                                                                    | 0.19                  | 0.048   | 1.000           |
| Tcfe3                     | NM_172472                 | ref Mus musculus transcription factor E3 (Tcfe3), transcript variant 1, mRNA [NM_172472]                                                                                              | 0.19                  | 0.034   | 1.000           |
| Slc25a5                   | NM_007451                 | ref Mus musculus solute carrier family 25 (mitochondrial carrier, adenine nucleotide translocator), member 5 (Slc25a5), nuclear gene encoding mitochondrial protein, mRNA [NM_007451] | 0.19                  | 0.038   | 1.000           |
| Fgd1                      | NM_008001                 | ref Mus musculus FYVE, RhoGEF and PH domain containing 1 (Fgd1), mRNA [NM_008001]                                                                                                     | 0.19                  | 0.036   | 1.000           |
| Gm4795                    | XM_894477                 | ref PREDICTED: Mus musculus predicted gene, EG215974 (EG215974), mRNA [XM_894477]                                                                                                     | 0.19                  | 0.033   | 1.000           |

Online Supplemental Table IV: mG4H-Veh Only

| Gene Symbol                       | RefSeq                     | Description                                                                                                                                                                        | logFC<br>mG4H-<br>Veh | P-value | Adj.<br>P-value |
|-----------------------------------|----------------------------|------------------------------------------------------------------------------------------------------------------------------------------------------------------------------------|-----------------------|---------|-----------------|
| <b>1200016B10Rik</b>              | NM_025819                  | ref Mus musculus RIKEN cDNA 1200016B10 gene (1200016B10Rik), mRNA [NM_025819]                                                                                                      | 0.19                  | 0.049   | 1.000           |
| <b>Wnt11</b>                      | NM_009519                  | ref Mus musculus wingless-related MMTV integration site 11 (Wnt11), mRNA [NM_009519]                                                                                               | 0.19                  | 0.024   | 0.954           |
| <b>ENSMUST00000077293</b>         | ENSMUST00000077293         | ens predicted gene 5785 Gene [Source:MGI Symbol;Acc:MGI:3643232] [ENSMUST00000077293]                                                                                              | 0.19                  | 0.032   | 1.000           |
| <b>4833439L19Rik</b>              | NM_133797                  | ref Mus musculus RIKEN cDNA 4833439L19 gene (4833439L19Rik), mRNA [NM_133797]                                                                                                      | 0.19                  | 0.026   | 0.973           |
| <b>Lphn1</b>                      | NM_181039                  | ref Mus musculus latrophilin 1 (Lphn1), mRNA [NM_181039]                                                                                                                           | 0.18                  | 0.038   | 1.000           |
| <b>chr4:82156098-82196298_F</b>   | chr4:82156098-82196298_F   | lincRNA:chr4:82156098-82196298 forward strand                                                                                                                                      | 0.18                  | 0.047   | 1.000           |
| <b>Wnk4</b>                       | NM_175638                  | ref Mus musculus WNK lysine deficient protein kinase 4 (Wnk4), mRNA [NM_175638]                                                                                                    | 0.18                  | 0.048   | 1.000           |
| <b>Slc22a5</b>                    | NM_011396                  | ref Mus musculus solute carrier family 22 (organic cation transporter), member 5 (Slc22a5), mRNA [NM_011396]                                                                       | 0.18                  | 0.043   | 1.000           |
| <b>chr16:77670599-77691642_F</b>  | chr16:77670599-77691642_F  | lincRNA:chr16:77670599-77691642 forward strand                                                                                                                                     | 0.18                  | 0.036   | 1.000           |
| <b>Itga7</b>                      | NM_008398                  | ref Mus musculus integrin alpha 7 (Itga7), mRNA [NM_008398]                                                                                                                        | 0.18                  | 0.016   | 0.851           |
| <b>St6galnac6</b>                 | NM_016973                  | ref Mus musculus ST6 (alpha-N-acetyl-neuraminy-2,3-beta-galactosyl-1,3)-N-acetylgalactosaminide alpha-2,6-sialyltransferase 6 (St6galnac6), transcript variant 1, mRNA [NM_016973] | 0.18                  | 0.045   | 1.000           |
| <b>Zfp672</b>                     | NM_178761                  | ref Mus musculus zinc finger protein 672 (Zfp672), transcript variant 1, mRNA [NM_178761]                                                                                          | 0.18                  | 0.030   | 0.998           |
| <b>6330416L07Rik</b>              | NM_176962                  | ref Mus musculus RIKEN cDNA 6330416L07 gene (6330416L07Rik), mRNA [NM_176962]                                                                                                      | 0.18                  | 0.029   | 0.986           |
| <b>Txndc11</b>                    | NM_029582                  | ref Mus musculus thioredoxin domain containing 11 (Txndc11), transcript variant 1, mRNA [NM_029582]                                                                                | 0.18                  | 0.049   | 1.000           |
| <b>chr3:100363012-100369462_R</b> | chr3:100363012-100369462_R | lincRNA:chr3:100363012-100369462 reverse strand                                                                                                                                    | 0.18                  | 0.024   | 0.952           |
| <b>Tmem161a</b>                   | NM_145597                  | ref Mus musculus transmembrane protein 161A (Tmem161a), mRNA [NM_145597]                                                                                                           | 0.18                  | 0.048   | 1.000           |
| <b>Nfic</b>                       | NM_008688                  | ref Mus musculus nuclear factor I/C (Nfic), transcript variant 1, mRNA [NM_008688]                                                                                                 | 0.18                  | 0.028   | 0.983           |
| <b>ENSMUST00000096143</b>         | ENSMUST00000096143         | ens Putative uncharacterized protein [Source:UniProtKB/TrEMBL;Acc:Q7TNN1] [ENSMUST00000096143]                                                                                     | 0.18                  | 0.022   | 0.926           |
| <b>chr3:100363012-100369971_R</b> | chr3:100363012-100369971_R | lincRNA:chr3:100363012-100369971 reverse strand                                                                                                                                    | 0.18                  | 0.042   | 1.000           |
| <b>Mocs2</b>                      | NM_013826                  | ref Mus musculus molybdenum cofactor synthesis 2 (Mocs2), transcript variant 1, mRNA [NM_013826]                                                                                   | 0.18                  | 0.020   | 0.897           |
| <b>Parm1</b>                      | NM_145562                  | ref Mus musculus prostate androgen-regulated mucin-like protein 1 (Parm1), mRNA [NM_145562]                                                                                        | 0.18                  | 0.012   | 0.791           |
| <b>Prep</b>                       | NM_011156                  | ref Mus musculus prolyl endopeptidase (Prep), mRNA [NM_011156]                                                                                                                     | 0.17                  | 0.031   | 0.998           |
| <b>Lrrfip1</b>                    | NM_008515                  | ref Mus musculus leucine rich repeat (in FLII) interacting protein 1 (Lrrfip1), transcript variant 2, mRNA [NM_008515]                                                             | 0.17                  | 0.032   | 1.000           |
| <b>4833439L19Rik</b>              | NM_133797                  | ref Mus musculus RIKEN cDNA 4833439L19 gene (4833439L19Rik), mRNA [NM_133797]                                                                                                      | 0.17                  | 0.030   | 0.998           |
| <b>Saps2</b>                      | NM_027805                  | ref Mus musculus SAPS domain family, member 2 (Saps2), transcript variant 2, mRNA [NM_027805]                                                                                      | 0.17                  | 0.037   | 1.000           |
| <b>Gm5452</b>                     | XR_033957                  | ref PREDICTED: Mus musculus similar to lactate dehydrogenase 1, A chain (LOC432789), misc RNA [XR_033957]                                                                          | 0.17                  | 0.029   | 0.986           |
| <b>Zfp770</b>                     | NM_175466                  | ref Mus musculus zinc finger protein 770 (Zfp770), mRNA [NM_175466]                                                                                                                | 0.17                  | 0.042   | 1.000           |

Online Supplemental Table IV: mG4H-Veh Only

| Gene Symbol                | RefSeq                     | Description                                                                                                              | logFC<br>mG4H-<br>Veh | P-value | Adj.<br>P-value |
|----------------------------|----------------------------|--------------------------------------------------------------------------------------------------------------------------|-----------------------|---------|-----------------|
| Gm8775                     | XR_030571                  | ref PREDICTED: Mus musculus similar to Murine homolog of human ftp-3 (LOC667709), misc RNA [XR_030571]                   | 0.17                  | 0.042   | 1.000           |
| Nkx2-5                     | NM_008700                  | ref Mus musculus NK2 transcription factor related, locus 5 (Drosophila) (Nkx2-5), mRNA [NM_008700]                       | 0.17                  | 0.040   | 1.000           |
| Paqr9                      | NM_198414                  | ref Mus musculus progesterin and adipoQ receptor family member IX (Paqr9), mRNA [NM_198414]                              | 0.16                  | 0.048   | 1.000           |
| Bcorl1                     | NM_178782                  | ref Mus musculus BCL6 co-repressor-like 1 (Bcorl1), mRNA [NM_178782]                                                     | 0.16                  | 0.045   | 1.000           |
| Nup54                      | NM_183392                  | ref Mus musculus nucleoporin 54 (Nup54), mRNA [NM_183392]                                                                | 0.16                  | 0.040   | 1.000           |
| Pus7                       | NM_178403                  | ref Mus musculus pseudouridylyl synthase 7 homolog (S. cerevisiae) (Pus7), mRNA [NM_178403]                              | 0.16                  | 0.031   | 0.998           |
| Srf                        | NM_020493                  | ref Mus musculus serum response factor (Srf), mRNA [NM_020493]                                                           | 0.16                  | 0.046   | 1.000           |
| Aen                        | NM_026531                  | ref Mus musculus apoptosis enhancing nuclease (Aen), transcript variant 1, mRNA [NM_026531]                              | 0.16                  | 0.030   | 0.998           |
| Pigx                       | NM_024464                  | ref Mus musculus phosphatidylinositol glycan anchor biosynthesis, class X (Pigx), transcript variant 1, mRNA [NM_024464] | 0.16                  | 0.041   | 1.000           |
| Plxna2                     | NM_008882                  | ref Mus musculus plexin A2 (Plxna2), mRNA [NM_008882]                                                                    | 0.16                  | 0.046   | 1.000           |
| Zfp706                     | NM_026521                  | ref Mus musculus zinc finger protein 706 (Zfp706), mRNA [NM_026521]                                                      | 0.16                  | 0.039   | 1.000           |
| chr6:86776350-86799379_R   | chr6:86776350-86799379_R   | lincRNA:chr6:86776350-86799379 reverse strand                                                                            | 0.16                  | 0.021   | 0.904           |
| Pcgf5                      | NM_029508                  | ref Mus musculus polycomb group ring finger 5 (Pcgf5), mRNA [NM_029508]                                                  | 0.16                  | 0.035   | 1.000           |
| Tmem185b                   | NM_146103                  | ref Mus musculus transmembrane protein 185B (Tmem185b), mRNA [NM_146103]                                                 | 0.15                  | 0.043   | 1.000           |
| Fam53b                     | NM_212473                  | ref Mus musculus family with sequence similarity 53, member B (Fam53b), mRNA [NM_212473]                                 | 0.15                  | 0.034   | 1.000           |
| Twsg1                      | NM_023053                  | ref Mus musculus twisted gastrulation homolog 1 (Drosophila) (Twsg1), mRNA [NM_023053]                                   | 0.15                  | 0.043   | 1.000           |
| Atxn2                      | NM_009125                  | ref Mus musculus ataxin 2 (Atxn2), mRNA [NM_009125]                                                                      | 0.15                  | 0.038   | 1.000           |
| chr3:100363012-100369971_R | chr3:100363012-100369971_R | lincRNA:chr3:100363012-100369971 reverse strand                                                                          | 0.15                  | 0.043   | 1.000           |
| Gm5523                     | NR_004447                  | ref Mus musculus predicted pseudogene 5523 (Gm5523), non-coding RNA [NR_004447]                                          | 0.15                  | 0.039   | 1.000           |
| Mdm2                       | NM_010786                  | ref Mus musculus transformed mouse 3T3 cell double minute 2 (Mdm2), mRNA [NM_010786]                                     | 0.15                  | 0.048   | 1.000           |
| Gm7428                     | XR_001700                  | ref PREDICTED: Mus musculus predicted gene, EG664965 (EG664965), misc RNA [XR_001700]                                    | 0.15                  | 0.049   | 1.000           |
| ENSMUST00000136319         | ENSMUST00000136319         | ens ubiquitin specific peptidase 50 Gene [Source:MGI (curated);Acc:MGI:1922333] [ENSMUST00000136319]                     | 0.15                  | 0.033   | 1.000           |
| Mtf1                       | NM_008636                  | ref Mus musculus metal response element binding transcription factor 1 (Mtf1), mRNA [NM_008636]                          | 0.15                  | 0.049   | 1.000           |
| Myl6                       | NM_010860                  | ref Mus musculus myosin, light polypeptide 6, alkali, smooth muscle and non-muscle (Myl6), mRNA [NM_010860]              | 0.14                  | 0.048   | 1.000           |
| Fam160a1                   | NM_172682                  | ref Mus musculus family with sequence similarity 160, member A1 (Fam160a1), mRNA [NM_172682]                             | 0.14                  | 0.050   | 1.000           |
| Slc39a7                    | NM_008202                  | ref Mus musculus solute carrier family 39 (zinc transporter), member 7 (Slc39a7), transcript variant 1, mRNA [NM_008202] | -0.14                 | 0.046   | 1.000           |
| Ccdc12                     | NM_028312                  | ref Mus musculus coiled-coil domain containing 12 (Ccdc12), mRNA [NM_028312]                                             | -0.14                 | 0.045   | 1.000           |
| Rpl10                      | NM_052835                  | ref Mus musculus ribosomal protein 10 (Rpl10), mRNA [NM_052835]                                                          | -0.14                 | 0.050   | 1.000           |
| Prpf8                      | NM_138659                  | ref Mus musculus pre-mRNA processing factor 8 (Prpf8), mRNA [NM_138659]                                                  | -0.14                 | 0.049   | 1.000           |

Online Supplemental Table IV: mG4H-Veh Only

| Gene Symbol      | RefSeq       | Description                                                                                                             | logFC<br>mG4H-<br>Veh | P-value | Adj.<br>P-value |
|------------------|--------------|-------------------------------------------------------------------------------------------------------------------------|-----------------------|---------|-----------------|
| <b>Txndc16</b>   | NM_172597    | ref Mus musculus thioredoxin domain containing 16 (Txndc16), mRNA [NM_172597]                                           | -0.14                 | 0.050   | 1.000           |
| <b>Gm10713</b>   | XM_001474680 | ref PREDICTED: Mus musculus similar to isolog of yeast sui1 and rice gos2; putative (LOC100040439), mRNA [XM_001474680] | -0.15                 | 0.049   | 1.000           |
| <b>Cog7</b>      | NM_001033318 | ref Mus musculus component of oligomeric golgi complex 7 (Cog7), mRNA [NM_001033318]                                    | -0.15                 | 0.024   | 0.957           |
| <b>Nudc</b>      | NM_010948    | ref Mus musculus nuclear distribution gene C homolog (Aspergillus) (Nudc), mRNA [NM_010948]                             | -0.15                 | 0.046   | 1.000           |
| <b>Xrcc5</b>     | NM_009533    | ref Mus musculus X-ray repair complementing defective repair in Chinese hamster cells 5 (Xrcc5), mRNA [NM_009533]       | -0.15                 | 0.043   | 1.000           |
| <b>Ganc</b>      | NM_172672    | ref Mus musculus glucosidase, alpha; neutral C (Ganc), mRNA [NM_172672]                                                 | -0.15                 | 0.030   | 0.995           |
| <b>Gtf2b</b>     | NM_145546    | ref Mus musculus general transcription factor IIB (Gtf2b), mRNA [NM_145546]                                             | -0.15                 | 0.036   | 1.000           |
| <b>Dscr3</b>     | NM_007834    | ref Mus musculus Down syndrome critical region gene 3 (Dscr3), mRNA [NM_007834]                                         | -0.16                 | 0.049   | 1.000           |
| <b>Clu</b>       | NM_013492    | ref Mus musculus clusterin (Clu), mRNA [NM_013492]                                                                      | -0.16                 | 0.044   | 1.000           |
| <b>Amdhd2</b>    | NM_172935    | ref Mus musculus amidohydrolase domain containing 2 (Amdhd2), mRNA [NM_172935]                                          | -0.16                 | 0.047   | 1.000           |
| <b>Ushbp1</b>    | NM_181418    | ref Mus musculus Usher syndrome 1C binding protein 1 (Ushbp1), mRNA [NM_181418]                                         | -0.16                 | 0.050   | 1.000           |
| <b>Fastkd3</b>   | NM_027123    | ref Mus musculus FAST kinase domains 3 (Fastkd3), mRNA [NM_027123]                                                      | -0.16                 | 0.046   | 1.000           |
| <b>Got1</b>      | NM_010324    | ref Mus musculus glutamate oxaloacetate transaminase 1, soluble (Got1), mRNA [NM_010324]                                | -0.16                 | 0.030   | 0.994           |
| <b>Mcph1</b>     | NM_173189    | ref Mus musculus microcephaly, primary autosomal recessive 1 (Mcph1), mRNA [NM_173189]                                  | -0.16                 | 0.050   | 1.000           |
| <b>Dpm1</b>      | NM_010072    | ref Mus musculus dolichol-phosphate (beta-D) mannosyltransferase 1 (Dpm1), mRNA [NM_010072]                             | -0.16                 | 0.037   | 1.000           |
| <b>Sp100</b>     | NM_013673    | ref Mus musculus nuclear antigen Sp100 (Sp100), mRNA [NM_013673]                                                        | -0.16                 | 0.046   | 1.000           |
| <b>Rnd2</b>      | NM_009708    | ref Mus musculus Rho family GTPase 2 (Rnd2), mRNA [NM_009708]                                                           | -0.16                 | 0.034   | 1.000           |
| <b>Efnb2</b>     | NM_010111    | ref Mus musculus ephrin B2 (Efnb2), mRNA [NM_010111]                                                                    | -0.16                 | 0.042   | 1.000           |
| <b>Faf1</b>      | NM_007983    | ref Mus musculus Fas-associated factor 1 (Faf1), mRNA [NM_007983]                                                       | -0.16                 | 0.024   | 0.957           |
| <b>Btbd9</b>     | NM_027060    | ref Mus musculus BTB (POZ) domain containing 9 (Btbd9), transcript variant 1, mRNA [NM_027060]                          | -0.16                 | 0.048   | 1.000           |
| <b>Tmem192</b>   | NM_028427    | ref Mus musculus transmembrane protein 192 (Tmem192), transcript variant 1, mRNA [NM_028427]                            | -0.16                 | 0.035   | 1.000           |
| <b>Cryab</b>     | NM_009964    | ref Mus musculus crystallin, alpha B (Cryab), mRNA [NM_009964]                                                          | -0.16                 | 0.043   | 1.000           |
| <b>Vps25</b>     | NM_026776    | ref Mus musculus vacuolar protein sorting 25 (yeast) (Vps25), mRNA [NM_026776]                                          | -0.16                 | 0.045   | 1.000           |
| <b>LOC547349</b> | NM_001025208 | ref Mus musculus similar to MHC class I antigen precursor (LOC547349), mRNA [NM_001025208]                              | -0.16                 | 0.026   | 0.973           |
| <b>Iqcc</b>      | NM_198026    | ref Mus musculus IQ motif containing C (Iqcc), mRNA [NM_198026]                                                         | -0.17                 | 0.048   | 1.000           |
| <b>Cd1d2</b>     | NM_007640    | ref Mus musculus CD1d2 antigen (Cd1d2), mRNA [NM_007640]                                                                | -0.17                 | 0.049   | 1.000           |
| <b>Scfd2</b>     | NM_001114660 | ref Mus musculus Sec1 family domain containing 2 (Scfd2), transcript variant a, mRNA [NM_001114660]                     | -0.17                 | 0.035   | 1.000           |
| <b>Ptov1</b>     | NM_133949    | ref Mus musculus prostate tumor over expressed gene 1 (Ptov1), mRNA [NM_133949]                                         | -0.17                 | 0.014   | 0.813           |
| <b>Obfc1</b>     | NM_175360    | ref Mus musculus oligonucleotide/oligosaccharide-binding fold containing 1 (Obfc1), mRNA [NM_175360]                    | -0.17                 | 0.046   | 1.000           |
| <b>Cyb561d2</b>  | NM_019720    | ref Mus musculus cytochrome b-561 domain containing 2 (Cyb561d2), mRNA [NM_019720]                                      | -0.17                 | 0.048   | 1.000           |

Online Supplemental Table IV: mG4H-Veh Only

| Gene Symbol                | RefSeq                     | Description                                                                                                                                                           | logFC<br>mG4H-<br>Veh | P-value | Adj.<br>P-value |
|----------------------------|----------------------------|-----------------------------------------------------------------------------------------------------------------------------------------------------------------------|-----------------------|---------|-----------------|
| Klhl34                     | NM_001081667               | ref Mus musculus kelch-like 34 (Drosophila) (Klhl34), mRNA [NM_001081667]                                                                                             | -0.17                 | 0.039   | 1.000           |
| Asb14                      | NM_001170748               | ref Mus musculus ankyrin repeat and SOCS box-containing 14 (Asb14), transcript variant 1, mRNA [NM_001170748]                                                         | -0.17                 | 0.043   | 1.000           |
| Mknk2                      | NM_021462                  | ref Mus musculus MAP kinase-interacting serine/threonine kinase 2 (Mknk2), mRNA [NM_021462]                                                                           | -0.17                 | 0.024   | 0.957           |
| Igsf9                      | NM_033608                  | ref Mus musculus immunoglobulin superfamily, member 9 (Igsf9), transcript variant 1, mRNA [NM_033608]                                                                 | -0.17                 | 0.032   | 1.000           |
| Gm6837                     | XM_900336                  | ref PREDICTED: Mus musculus predicted gene, EG628080 (EG628080), mRNA [XM_900336]                                                                                     | -0.17                 | 0.046   | 1.000           |
| Ath11                      | NM_145387                  | ref Mus musculus ATH1, acid trehalase-like 1 (yeast) (Ath11), mRNA [NM_145387]                                                                                        | -0.17                 | 0.042   | 1.000           |
| 9130401M01Rik              | NM_029418                  | ref Mus musculus RIKEN cDNA 9130401M01 gene (9130401M01Rik), mRNA [NM_029418]                                                                                         | -0.18                 | 0.044   | 1.000           |
| Polr3gl                    | NM_027241                  | ref Mus musculus polymerase (RNA) III (DNA directed) polypeptide G like (Polr3gl), mRNA [NM_027241]                                                                   | -0.18                 | 0.035   | 1.000           |
| Lmcd1                      | NM_144799                  | ref Mus musculus LIM and cysteine-rich domains 1 (Lmcd1), mRNA [NM_144799]                                                                                            | -0.18                 | 0.037   | 1.000           |
| Med25                      | NM_029365                  | ref Mus musculus mediator of RNA polymerase II transcription, subunit 25 homolog (yeast) (Med25), mRNA [NM_029365]                                                    | -0.18                 | 0.029   | 0.986           |
| Ramp2                      | NM_019444                  | ref Mus musculus receptor (calcitonin) activity modifying protein 2 (Ramp2), mRNA [NM_019444]                                                                         | -0.18                 | 0.024   | 0.957           |
| Prnp                       | NM_011170                  | ref Mus musculus prion protein (Prnp), mRNA [NM_011170]                                                                                                               | -0.18                 | 0.024   | 0.957           |
| Hmgn5                      | NM_016710                  | ref Mus musculus high-mobility group nucleosome binding domain 5 (Hmgn5), mRNA [NM_016710]                                                                            | -0.18                 | 0.027   | 0.983           |
| Ddx28                      | NM_028038                  | ref Mus musculus DEAD (Asp-Glu-Ala-Asp) box polypeptide 28 (Ddx28), nuclear gene encoding mitochondrial protein, mRNA [NM_028038]                                     | -0.18                 | 0.019   | 0.881           |
| Rasl12                     | NM_001033158               | ref Mus musculus RAS-like, family 12 (Rasl12), transcript variant 1, mRNA [NM_001033158]                                                                              | -0.18                 | 0.020   | 0.889           |
| Zfp106                     | NM_011743                  | ref Mus musculus zinc finger protein 106 (Zfp106), mRNA [NM_011743]                                                                                                   | -0.18                 | 0.035   | 1.000           |
| Ddx1                       | NM_134040                  | ref Mus musculus DEAD (Asp-Glu-Ala-Asp) box polypeptide 1 (Ddx1), mRNA [NM_134040]                                                                                    | -0.18                 | 0.033   | 1.000           |
| chr7:119809687-119811410_R | chr7:119809687-119811410_R | lincRNA:chr7:119809687-119811410 reverse strand                                                                                                                       | -0.18                 | 0.046   | 1.000           |
| 2900010J23Rik              | NM_175190                  | ref Mus musculus RIKEN cDNA 2900010J23 gene (2900010J23Rik), mRNA [NM_175190]                                                                                         | -0.18                 | 0.045   | 1.000           |
| Acr                        | NM_013455                  | ref Mus musculus acrosin prepropeptide (Acr), mRNA [NM_013455]                                                                                                        | -0.18                 | 0.043   | 1.000           |
| Cenpp                      | NM_025495                  | ref Mus musculus centromere protein P (Cenpp), mRNA [NM_025495]                                                                                                       | -0.19                 | 0.026   | 0.971           |
| Cabc1                      | NM_023341                  | ref Mus musculus chaperone, ABC1 activity of bc1 complex like (S. pombe) (Cabc1), nuclear gene encoding mitochondrial protein, transcript variant 1, mRNA [NM_023341] | -0.19                 | 0.049   | 1.000           |
| Vps11                      | NM_027889                  | ref Mus musculus vacuolar protein sorting 11 (yeast) (Vps11), mRNA [NM_027889]                                                                                        | -0.19                 | 0.047   | 1.000           |
| Serpini1                   | NM_009250                  | ref Mus musculus serine (or cysteine) peptidase inhibitor, clade I, member 1 (Serpini1), mRNA [NM_009250]                                                             | -0.19                 | 0.020   | 0.890           |
| Il3ra                      | NM_008369                  | ref Mus musculus interleukin 3 receptor, alpha chain (Il3ra), mRNA [NM_008369]                                                                                        | -0.19                 | 0.020   | 0.895           |
| Nyx                        | NM_173415                  | ref Mus musculus nyctalopin (Nyx), mRNA [NM_173415]                                                                                                                   | -0.19                 | 0.044   | 1.000           |
| Tars2                      | NM_001163619               | ref Mus musculus threonyl-tRNA synthetase 2, mitochondrial (putative) (Tars2), nuclear gene encoding mitochondrial protein, transcript variant 4, mRNA [NM_001163619] | -0.19                 | 0.040   | 1.000           |

Online Supplemental Table IV: mG4H-Veh Only

| Gene Symbol                | RefSeq                     | Description                                                                                                                    | logFC<br>mG4H-<br>Veh | P-value | Adj.<br>P-value |
|----------------------------|----------------------------|--------------------------------------------------------------------------------------------------------------------------------|-----------------------|---------|-----------------|
| BC024814                   | NM_146247                  | ref Mus musculus cDNA sequence BC024814 (BC024814), mRNA [NM_146247]                                                           | -0.19                 | 0.027   | 0.983           |
| Fam20c                     | NM_030565                  | ref Mus musculus family with sequence similarity 20, member C (Fam20c), mRNA [NM_030565]                                       | -0.19                 | 0.045   | 1.000           |
| Map4k2                     | NM_009006                  | ref Mus musculus mitogen-activated protein kinase kinase kinase kinase 2 (Map4k2), mRNA [NM_009006]                            | -0.19                 | 0.033   | 1.000           |
| Psip1                      | NM_133948                  | ref Mus musculus PC4 and SFRS1 interacting protein 1 (Psip1), mRNA [NM_133948]                                                 | -0.19                 | 0.043   | 1.000           |
| 2410002F23Rik              | NM_025880                  | ref Mus musculus RIKEN cDNA 2410002F23 gene (2410002F23Rik), mRNA [NM_025880]                                                  | -0.19                 | 0.037   | 1.000           |
| Snx8                       | NM_172277                  | ref Mus musculus sorting nexin 8 (Snx8), mRNA [NM_172277]                                                                      | -0.19                 | 0.023   | 0.941           |
| Frat2                      | NM_177603                  | ref Mus musculus frequently rearranged in advanced T-cell lymphomas 2 (Frat2), mRNA [NM_177603]                                | -0.20                 | 0.046   | 1.000           |
| B2m                        | NM_009735                  | ref Mus musculus beta-2 microglobulin (B2m), mRNA [NM_009735]                                                                  | -0.20                 | 0.014   | 0.825           |
| Kank3                      | NM_030697                  | ref Mus musculus KN motif and ankyrin repeat domains 3 (Kank3), mRNA [NM_030697]                                               | -0.20                 | 0.020   | 0.889           |
| Wwp2                       | NM_025830                  | ref Mus musculus WW domain containing E3 ubiquitin protein ligase 2 (Wwp2), mRNA [NM_025830]                                   | -0.20                 | 0.034   | 1.000           |
| Mlx                        | NM_011550                  | ref Mus musculus MAX-like protein X (Mlx), transcript variant 3, mRNA [NM_011550]                                              | -0.20                 | 0.017   | 0.858           |
| Lmcd1                      | NM_144799                  | ref Mus musculus LIM and cysteine-rich domains 1 (Lmcd1), mRNA [NM_144799]                                                     | -0.20                 | 0.041   | 1.000           |
| Mfap1b                     | NM_001081975               | ref Mus musculus microfibrillar-associated protein 1B (Mfap1b), mRNA [NM_001081975]                                            | -0.20                 | 0.019   | 0.881           |
| Dapk1                      | NM_029653                  | ref Mus musculus death associated protein kinase 1 (Dapk1), transcript variant 1, mRNA [NM_029653]                             | -0.20                 | 0.023   | 0.944           |
| 1300018J18Rik              | NM_027905                  | ref Mus musculus RIKEN cDNA 1300018J18 gene (1300018J18Rik), mRNA [NM_027905]                                                  | -0.20                 | 0.018   | 0.864           |
| 2410066E13Rik              | NM_026629                  | ref Mus musculus RIKEN cDNA 2410066E13 gene (2410066E13Rik), mRNA [NM_026629]                                                  | -0.20                 | 0.009   | 0.731           |
| ORF19                      | NM_026833                  | ref Mus musculus open reading frame 19 (ORF19), transcript variant 1, mRNA [NM_026833]                                         | -0.20                 | 0.026   | 0.973           |
| ENSMUST00000094465         | ENSMUST00000094465         | ens predicted gene 572 (Gm572), mRNA [Source:RefSeq DNA;Acc:NM_001085505] [ENSMUST00000094465]                                 | -0.20                 | 0.032   | 1.000           |
| Rpl26                      | NM_009080                  | ref Mus musculus ribosomal protein L26 (Rpl26), mRNA [NM_009080]                                                               | -0.20                 | 0.047   | 1.000           |
| Hip1r                      | NM_145070                  | ref Mus musculus huntingtin interacting protein 1 related (Hip1r), mRNA [NM_145070]                                            | -0.20                 | 0.049   | 1.000           |
| 2010107H07Rik              | NR_024069                  | ref Mus musculus RIKEN cDNA 2010107H07 gene (2010107H07Rik), non-coding RNA [NR_024069]                                        | -0.20                 | 0.013   | 0.799           |
| 2310010J17Rik              | XM_896611                  | ref PREDICTED: Mus musculus RIKEN cDNA 2310010J17 gene (2310010J17Rik), mRNA [XM_896611]                                       | -0.20                 | 0.034   | 1.000           |
| H13                        | NM_010376                  | ref Mus musculus histocompatibility 13 (H13), transcript variant 2, mRNA [NM_010376]                                           | -0.20                 | 0.013   | 0.794           |
| Odc1                       | NM_013614                  | ref Mus musculus ornithine decarboxylase, structural 1 (Odc1), mRNA [NM_013614]                                                | -0.20                 | 0.022   | 0.933           |
| Ppfbp2                     | NM_008905                  | ref Mus musculus PTPRF interacting protein, binding protein 2 (liprin beta 2) (Ppfbp2), transcript variant 1, mRNA [NM_008905] | -0.20                 | 0.027   | 0.983           |
| chr2:155269145-155303251_F | chr2:155269145-155303251_F | lincRNA:chr2:155269145-155303251 forward strand                                                                                | -0.20                 | 0.018   | 0.877           |
| chr7:128341797-128414692_R | chr7:128341797-128414692_R | lincRNA:chr7:128341797-128414692 reverse strand                                                                                | -0.21                 | 0.016   | 0.846           |
| Dock11                     | NM_001009947               | ref Mus musculus dedicator of cytokinesis 11 (Dock11), mRNA [NM_001009947]                                                     | -0.21                 | 0.037   | 1.000           |
| chr7:128341797-128414692_R | chr7:128341797-128414692_R | lincRNA:chr7:128341797-128414692 reverse strand                                                                                | -0.21                 | 0.023   | 0.937           |



Online Supplemental Table IV: mG4H-Veh Only

| Gene Symbol                       | RefSeq                     | Description                                                                                                                                                                                         | logFC<br>mG4H-<br>Veh | P-value | Adj.<br>P-value |
|-----------------------------------|----------------------------|-----------------------------------------------------------------------------------------------------------------------------------------------------------------------------------------------------|-----------------------|---------|-----------------|
| <b>AW549542</b>                   | AK035112                   | gb Mus musculus 12 days embryo embryonic body between diaphragm region and neck cDNA, RIKEN full-length enriched library, clone:9430089J01 product:unclassifiable, full insert sequence. [AK035112] | -0.21                 | 0.019   | 0.881           |
| <b>B230334C09Rik</b>              | AK081211                   | gb Mus musculus adult male corpus striatum cDNA, RIKEN full-length enriched library, clone:C030005117 product:unclassifiable, full insert sequence. [AK081211]                                      | -0.21                 | 0.047   | 1.000           |
| <b>Vps25</b>                      | NM_026776                  | ref Mus musculus vacuolar protein sorting 25 (yeast) (Vps25), mRNA [NM_026776]                                                                                                                      | -0.21                 | 0.018   | 0.869           |
| <b>Gm7483</b>                     | XR_032712                  | ref PREDICTED: Mus musculus similar to cyclin B (LOC665085), misc RNA [XR_032712]                                                                                                                   | -0.21                 | 0.037   | 1.000           |
| <b>Scara5</b>                     | NM_028903                  | ref Mus musculus scavenger receptor class A, member 5 (putative) (Scara5), transcript variant 1, mRNA [NM_028903]                                                                                   | -0.21                 | 0.018   | 0.864           |
| <b>L2hgdh</b>                     | NM_145443                  | ref Mus musculus L-2-hydroxyglutarate dehydrogenase (L2hgdh), nuclear gene encoding mitochondrial protein, mRNA [NM_145443]                                                                         | -0.21                 | 0.031   | 0.998           |
| <b>Hspb7</b>                      | NM_013868                  | ref Mus musculus heat shock protein family, member 7 (cardiovascular) (Hspb7), mRNA [NM_013868]                                                                                                     | -0.21                 | 0.031   | 0.998           |
| <b>Gm5869</b>                     | XR_031253                  | ref PREDICTED: Mus musculus similar to elongation factor 1 alpha (LOC545767), misc RNA [XR_031253]                                                                                                  | -0.21                 | 0.033   | 1.000           |
| <b>Mocs1</b>                      | NM_020042                  | ref Mus musculus molybdenum cofactor synthesis 1 (Mocs1), transcript variant 1, mRNA [NM_020042]                                                                                                    | -0.21                 | 0.019   | 0.883           |
| <b>Gm13308</b>                    | NM_001177580               | ref Mus musculus predicted gene 13308 (Gm13308), mRNA [NM_001177580]                                                                                                                                | -0.21                 | 0.025   | 0.965           |
| <b>Spcs3</b>                      | NM_029701                  | ref Mus musculus signal peptidase complex subunit 3 homolog (S. cerevisiae) (Spcs3), mRNA [NM_029701]                                                                                               | -0.21                 | 0.009   | 0.720           |
| <b>9030425E11Rik</b>              | NM_133733                  | ref Mus musculus RIKEN cDNA 9030425E11 gene (9030425E11Rik), mRNA [NM_133733]                                                                                                                       | -0.21                 | 0.020   | 0.891           |
| <b>Otud3</b>                      | NM_028453                  | ref Mus musculus OTU domain containing 3 (Otud3), mRNA [NM_028453]                                                                                                                                  | -0.21                 | 0.025   | 0.957           |
| <b>Gprc5c</b>                     | NM_001110337               | ref Mus musculus G protein-coupled receptor, family C, group 5, member C (Gprc5c), transcript variant 1, mRNA [NM_001110337]                                                                        | -0.21                 | 0.013   | 0.793           |
| <b>Tmbim4</b>                     | NM_026617                  | ref Mus musculus transmembrane BAX inhibitor motif containing 4 (Tmbim4), mRNA [NM_026617]                                                                                                          | -0.21                 | 0.037   | 1.000           |
| <b>Ebf2</b>                       | NM_010095                  | ref Mus musculus early B-cell factor 2 (Ebf2), mRNA [NM_010095]                                                                                                                                     | -0.21                 | 0.015   | 0.831           |
| <b>Rnf34</b>                      | NM_030564                  | ref Mus musculus ring finger protein 34 (Rnf34), mRNA [NM_030564]                                                                                                                                   | -0.21                 | 0.012   | 0.793           |
| <b>Dgke</b>                       | NM_019505                  | ref Mus musculus diacylglycerol kinase, epsilon (Dgke), mRNA [NM_019505]                                                                                                                            | -0.22                 | 0.036   | 1.000           |
| <b>Siglech</b>                    | NM_178706                  | ref Mus musculus sialic acid binding Ig-like lectin H (Siglech), mRNA [NM_178706]                                                                                                                   | -0.22                 | 0.031   | 0.998           |
| <b>Gm8874</b>                     | XR_035677                  | ref PREDICTED: Mus musculus predicted gene, EG667907 (EG667907), misc RNA [XR_035677]                                                                                                               | -0.22                 | 0.043   | 1.000           |
| <b>chr12:74135916-74142780_F</b>  | chr12:74135916-74142780_F  | lincRNA:chr12:74135916-74142780 forward strand                                                                                                                                                      | -0.22                 | 0.036   | 1.000           |
| <b>chr11:33414450-33450750_R</b>  | chr11:33414450-33450750_R  | lincRNA:chr11:33414450-33450750 reverse strand                                                                                                                                                      | -0.22                 | 0.041   | 1.000           |
| <b>H2-Q10</b>                     | NM_010391                  | ref Mus musculus histocompatibility 2, Q region locus 10 (H2-Q10), mRNA [NM_010391]                                                                                                                 | -0.22                 | 0.011   | 0.774           |
| <b>ORF19</b>                      | NM_026833                  | ref Mus musculus open reading frame 19 (ORF19), transcript variant 1, mRNA [NM_026833]                                                                                                              | -0.22                 | 0.027   | 0.983           |
| <b>Gm9521</b>                     | XR_034015                  | ref PREDICTED: Mus musculus similar to eukaryotic translation elongation factor 1 alpha 1 (LOC671190), misc RNA [XR_034015]                                                                         | -0.22                 | 0.035   | 1.000           |
| <b>chr2:155269145-155303251_F</b> | chr2:155269145-155303251_F | lincRNA:chr2:155269145-155303251 forward strand                                                                                                                                                     | -0.22                 | 0.023   | 0.940           |

Online Supplemental Table IV: mG4H-Veh Only

| Gene Symbol                      | RefSeq                    | Description                                                                                                                                               | logFC<br>mG4H-<br>Veh | P-value | Adj.<br>P-value |
|----------------------------------|---------------------------|-----------------------------------------------------------------------------------------------------------------------------------------------------------|-----------------------|---------|-----------------|
| <b>2310002L09Rik</b>             | NM_027981                 | ref Mus musculus RIKEN cDNA 2310002L09 gene (2310002L09Rik), transcript variant 1, mRNA [NM_027981]                                                       | -0.22                 | 0.037   | 1.000           |
| <b>Aamp</b>                      | NM_146110                 | ref Mus musculus angio-associated migratory protein (Aamp), transcript variant 2, mRNA [NM_146110]                                                        | -0.22                 | 0.004   | 0.538           |
| <b>1700029G01Rik</b>             | NM_001162533              | ref Mus musculus RIKEN cDNA 1700029G01 gene (1700029G01Rik), transcript variant 1, mRNA [NM_001162533]                                                    | -0.22                 | 0.033   | 1.000           |
| <b>Txlnb</b>                     | NM_138628                 | ref Mus musculus taxilin beta (Txlnb), mRNA [NM_138628]                                                                                                   | -0.22                 | 0.012   | 0.792           |
| <b>1700066M21Rik</b>             | NM_028546                 | ref Mus musculus RIKEN cDNA 1700066M21 gene (1700066M21Rik), mRNA [NM_028546]                                                                             | -0.22                 | 0.044   | 1.000           |
| <b>E130215H24Rik</b>             | AK160355                  | gb Mus musculus 0 day neonate eyeball cDNA, RIKEN full-length enriched library, clone:E130215H24 product:unclassifiable, full insert sequence. [AK160355] | -0.22                 | 0.045   | 1.000           |
| <b>Kcnp3</b>                     | NM_001111331              | ref Mus musculus Kv channel interacting protein 3, calsenilin (Kcnp3), transcript variant 2, mRNA [NM_001111331]                                          | -0.22                 | 0.046   | 1.000           |
| <b>Snrnp200</b>                  | NM_177214                 | ref Mus musculus small nuclear ribonucleoprotein 200 (U5) (Snrnp200), mRNA [NM_177214]                                                                    | -0.23                 | 0.012   | 0.786           |
| <b>chr17:26911032-26912366_F</b> | chr17:26911032-26912366_F | lincRNA:chr17:26911032-26912366 forward strand                                                                                                            | -0.23                 | 0.032   | 1.000           |
| <b>H2-K1</b>                     | NM_001001892              | ref Mus musculus histocompatibility 2, K1, K region (H2-K1), transcript variant 1, mRNA [NM_001001892]                                                    | -0.23                 | 0.031   | 0.998           |
| <b>Atg2a</b>                     | NM_194348                 | ref Mus musculus ATG2 autophagy related 2 homolog A (S. cerevisiae) (Atg2a), mRNA [NM_194348]                                                             | -0.23                 | 0.015   | 0.831           |
| <b>Etl4</b>                      | NM_001081006              | ref Mus musculus enhancer trap locus 4 (Etl4), transcript variant c, mRNA [NM_001081006]                                                                  | -0.23                 | 0.025   | 0.958           |
| <b>Etl4</b>                      | NM_001081006              | ref Mus musculus enhancer trap locus 4 (Etl4), transcript variant c, mRNA [NM_001081006]                                                                  | -0.23                 | 0.011   | 0.770           |
| <b>Trim25</b>                    | NM_009546                 | ref Mus musculus tripartite motif-containing 25 (Trim25), mRNA [NM_009546]                                                                                | -0.23                 | 0.026   | 0.973           |
| <b>ENSMUST00000110031</b>        | ENSMUST00000110031        | ens AU RNA binding protein/enoyl-coenzyme A hydratase Gene [Source:MGI (curated);Acc:MGI:1338011] [ENSMUST00000110031]                                    | -0.23                 | 0.023   | 0.936           |
| <b>Snrk</b>                      | NM_133741                 | ref Mus musculus SNF related kinase (Snrk), transcript variant 1, mRNA [NM_133741]                                                                        | -0.23                 | 0.022   | 0.934           |
| <b>Cdv3</b>                      | NM_001134426              | ref Mus musculus carnitine deficiency-associated gene expressed in ventricle 3 (Cdv3), transcript variant 3, mRNA [NM_001134426]                          | -0.23                 | 0.006   | 0.632           |
| <b>Hsd11b1</b>                   | NM_008288                 | ref Mus musculus hydroxysteroid 11-beta dehydrogenase 1 (Hsd11b1), transcript variant 1, mRNA [NM_008288]                                                 | -0.23                 | 0.031   | 1.000           |
| <b>Pet112l</b>                   | NM_144896                 | ref Mus musculus PET112-like (yeast) (Pet112l), nuclear gene encoding mitochondrial protein, mRNA [NM_144896]                                             | -0.23                 | 0.008   | 0.694           |
| <b>Aspscr1</b>                   | NM_026877                 | ref Mus musculus alveolar soft part sarcoma chromosome region, candidate 1 (human) (Aspscr1), transcript variant 1, mRNA [NM_026877]                      | -0.23                 | 0.008   | 0.700           |
| <b>Mbnl2</b>                     | NM_175341                 | ref Mus musculus muscleblind-like 2 (Mbnl2), transcript variant 1, mRNA [NM_175341]                                                                       | -0.23                 | 0.036   | 1.000           |
| <b>Il11ra1</b>                   | NM_001172054              | ref Mus musculus interleukin 11 receptor, alpha chain 1 (Il11ra1), transcript variant 3, mRNA [NM_001172054]                                              | -0.23                 | 0.003   | 0.485           |
| <b>LOC676755</b>                 | XM_992608                 | ref PREDICTED: Mus musculus similar to U2-associated SR140 protein (LOC676755), mRNA [XM_992608]                                                          | -0.23                 | 0.034   | 1.000           |
| <b>Spcs3</b>                     | NM_029701                 | ref Mus musculus signal peptidase complex subunit 3 homolog (S. cerevisiae) (Spcs3), mRNA [NM_029701]                                                     | -0.23                 | 0.004   | 0.516           |
| <b>Ehhadh</b>                    | NM_023737                 | ref Mus musculus enoyl-Coenzyme A, hydratase/3-hydroxyacyl Coenzyme A dehydrogenase (Ehhadh), mRNA [NM_023737]                                            | -0.23                 | 0.013   | 0.796           |

Online Supplemental Table IV: mG4H-Veh Only

| Gene Symbol                 | RefSeq                      | Description                                                                                                                                           | logFC<br>mG4H-<br>Veh | P-value | Adj.<br>P-value |
|-----------------------------|-----------------------------|-------------------------------------------------------------------------------------------------------------------------------------------------------|-----------------------|---------|-----------------|
| Tm2d2                       | NM_027194                   | ref Mus musculus TM2 domain containing 2 (Tm2d2), mRNA [NM_027194]                                                                                    | -0.23                 | 0.007   | 0.679           |
| Surf1                       | NM_013677                   | ref Mus musculus surfet gene 1 (Surf1), mRNA [NM_013677]                                                                                              | -0.23                 | 0.015   | 0.826           |
| Csrp3                       | NM_013808                   | ref Mus musculus cysteine and glycine-rich protein 3 (Csrp3), mRNA [NM_013808]                                                                        | -0.23                 | 0.007   | 0.674           |
| Cd82                        | NM_001136055                | ref Mus musculus CD82 antigen (Cd82), transcript variant 2, mRNA [NM_001136055]                                                                       | -0.23                 | 0.035   | 1.000           |
| Notch1                      | NM_008714                   | ref Mus musculus Notch gene homolog 1 (Drosophila) (Notch1), mRNA [NM_008714]                                                                         | -0.23                 | 0.050   | 1.000           |
| Tubgcp2                     | NM_133755                   | ref Mus musculus tubulin, gamma complex associated protein 2 (Tubgcp2), mRNA [NM_133755]                                                              | -0.24                 | 0.013   | 0.793           |
| Tmem191c                    | NM_177473                   | ref Mus musculus transmembrane protein 191C (Tmem191c), mRNA [NM_177473]                                                                              | -0.24                 | 0.019   | 0.881           |
| Alox5                       | NM_009662                   | ref Mus musculus arachidonate 5-lipoxygenase (Alox5), mRNA [NM_009662]                                                                                | -0.24                 | 0.017   | 0.854           |
| LOC675328                   | XR_033777                   | ref PREDICTED: Mus musculus similar to MHC H2-TL-T10-b (LOC675328), misc RNA [XR_033777]                                                              | -0.24                 | 0.008   | 0.705           |
| Trp53inp1                   | NM_021897                   | ref Mus musculus transformation related protein 53 inducible nuclear protein 1 (Trp53inp1), mRNA [NM_021897]                                          | -0.24                 | 0.030   | 0.998           |
| Sp4                         | NM_009239                   | ref Mus musculus trans-acting transcription factor 4 (Sp4), transcript variant 1, mRNA [NM_009239]                                                    | -0.24                 | 0.028   | 0.983           |
| Cdv3                        | NM_175833                   | ref Mus musculus carnitine deficiency-associated gene expressed in ventricle 3 (Cdv3), transcript variant 2, mRNA [NM_175833]                         | -0.24                 | 0.006   | 0.646           |
| Cpne1                       | NM_170588                   | ref Mus musculus copine I (Cpne1), transcript variant 1, mRNA [NM_170588]                                                                             | -0.24                 | 0.049   | 1.000           |
| Mttr14                      | NM_026849                   | ref Mus musculus myotubularin related protein 14 (Mttr14), mRNA [NM_026849]                                                                           | -0.24                 | 0.020   | 0.885           |
| Esrb                        | NM_001159500                | ref Mus musculus estrogen related receptor, beta (Esrb), transcript variant 2, mRNA [NM_001159500]                                                    | -0.24                 | 0.007   | 0.686           |
| Dgat1                       | NM_010046                   | ref Mus musculus diacylglycerol O-acyltransferase 1 (Dgat1), mRNA [NM_010046]                                                                         | -0.24                 | 0.012   | 0.786           |
| 4930552P12Rik               | AK019762                    | gb Mus musculus adult male testis cDNA, RIKEN full-length enriched library, clone:4930552P12 product:unclassifiable, full insert sequence. [AK019762] | -0.24                 | 0.010   | 0.744           |
| Optn                        | NM_181848                   | ref Mus musculus optineurin (Optn), mRNA [NM_181848]                                                                                                  | -0.24                 | 0.022   | 0.926           |
| Dctn2                       | NM_027151                   | ref Mus musculus dynactin 2 (Dctn2), transcript variant 3, mRNA [NM_027151]                                                                           | -0.24                 | 0.005   | 0.584           |
| ENSMUST00000100735          | ENSMUST00000100735          | ens Putative uncharacterized protein [Source:UniProtKB/TrEMBL;Acc:Q3UY91] [ENSMUST00000100735]                                                        | -0.24                 | 0.024   | 0.957           |
| chr15:102100397-102105872_F | chr15:102100397-102105872_F | lincRNA:chr15:102100397-102105872 forward strand                                                                                                      | -0.24                 | 0.046   | 1.000           |
| Pbxip1                      | NM_146131                   | ref Mus musculus pre-B-cell leukemia transcription factor interacting protein 1 (Pbxip1), mRNA [NM_146131]                                            | -0.24                 | 0.001   | 0.311           |
| Dnase1l1                    | NM_027109                   | ref Mus musculus deoxyribonuclease 1-like 1 (Dnase1l1), transcript variant 1, mRNA [NM_027109]                                                        | -0.24                 | 0.017   | 0.858           |
| Impact                      | NM_008378                   | ref Mus musculus imprinted and ancient (Impact), mRNA [NM_008378]                                                                                     | -0.24                 | 0.013   | 0.805           |
| Myh1                        | NM_030679                   | ref Mus musculus myosin, heavy polypeptide 1, skeletal muscle, adult (Myh1), mRNA [NM_030679]                                                         | -0.25                 | 0.032   | 1.000           |
| chr1:39739048-39740125_F    | chr1:39739048-39740125_F    | lincRNA:chr1:39739048-39740125 forward strand                                                                                                         | -0.25                 | 0.041   | 1.000           |
| Fbxw10                      | NM_001033669                | ref Mus musculus F-box and WD-40 domain protein 10 (Fbxw10), mRNA [NM_001033669]                                                                      | -0.25                 | 0.031   | 0.998           |
| Galk2                       | NM_175154                   | ref Mus musculus galactokinase 2 (Galk2), mRNA [NM_175154]                                                                                            | -0.25                 | 0.030   | 0.998           |

Online Supplemental Table IV: mG4H-Veh Only

| Gene Symbol                | RefSeq                     | Description                                                                                                                                          | logFC<br>mG4H-<br>Veh | P-value | Adj.<br>P-value |
|----------------------------|----------------------------|------------------------------------------------------------------------------------------------------------------------------------------------------|-----------------------|---------|-----------------|
| Tbc1d2                     | NM_198664                  | ref Mus musculus TBC1 domain family, member 2 (Tbc1d2), mRNA [NM_198664]                                                                             | -0.25                 | 0.031   | 0.998           |
| LOC100044874               | XM_001473540               | ref PREDICTED: Mus musculus similar to MHC H2-K 24 polypeptide, transcript variant 1 (LOC100044874), mRNA [XM_001473540]                             | -0.25                 | 0.033   | 1.000           |
| Kcna5                      | NM_145983                  | ref Mus musculus potassium voltage-gated channel, shaker-related subfamily, member 5 (Kcna5), mRNA [NM_145983]                                       | -0.25                 | 0.024   | 0.957           |
| Olfir250                   | NM_207552                  | ref Mus musculus olfactory receptor 250 (Olfir250), mRNA [NM_207552]                                                                                 | -0.25                 | 0.018   | 0.864           |
| Cdv3                       | NM_001134426               | ref Mus musculus carnitine deficiency-associated gene expressed in ventricle 3 (Cdv3), transcript variant 3, mRNA [NM_001134426]                     | -0.25                 | 0.021   | 0.914           |
| chrX:146827709-146913398_R | chrX:146827709-146913398_R | lincRNA:chrX:146827709-146913398 reverse strand                                                                                                      | -0.25                 | 0.033   | 1.000           |
| Polg                       | NM_017462                  | ref Mus musculus polymerase (DNA directed), gamma (Polg), mRNA [NM_017462]                                                                           | -0.25                 | 0.006   | 0.661           |
| chr5:139230332-139230823_R | chr5:139230332-139230823_R | lincRNA:chr5:139230332-139230823 reverse strand                                                                                                      | -0.25                 | 0.019   | 0.883           |
| Dapp1                      | NM_011932                  | ref Mus musculus dual adaptor for phosphotyrosine and 3-phosphoinositides 1 (Dapp1), mRNA [NM_011932]                                                | -0.25                 | 0.014   | 0.820           |
| chr2:155269145-155303251_F | chr2:155269145-155303251_F | lincRNA:chr2:155269145-155303251 forward strand                                                                                                      | -0.25                 | 0.006   | 0.626           |
| H2-Q2                      | NM_010392                  | ref Mus musculus histocompatibility 2, Q region locus 2 (H2-Q2), mRNA [NM_010392]                                                                    | -0.25                 | 0.008   | 0.694           |
| chr4:155585650-155608700_R | chr4:155585650-155608700_R | lincRNA:chr4:155585650-155608700 reverse strand                                                                                                      | -0.25                 | 0.023   | 0.941           |
| LOC677149                  | XM_001000983               | ref PREDICTED: Mus musculus similar to H2-BI protein (LOC677149), mRNA [XM_001000983]                                                                | -0.25                 | 0.007   | 0.679           |
| Uaca                       | NM_028283                  | ref Mus musculus uveal autoantigen with coiled-coil domains and ankyrin repeats (Uaca), mRNA [NM_028283]                                             | -0.25                 | 0.008   | 0.705           |
| Gm7084                     | XR_033982                  | ref PREDICTED: Mus musculus similar to pleckstrin homology domain containing, family F (with FYVE domain) member 1 (LOC632287), misc RNA [XR_033982] | -0.25                 | 0.043   | 1.000           |
| chr17:26911397-26917047_F  | chr17:26911397-26917047_F  | lincRNA:chr17:26911397-26917047 forward strand                                                                                                       | -0.25                 | 0.023   | 0.941           |
| chr3:41327493-41328368_F   | chr3:41327493-41328368_F   | lincRNA:chr3:41327493-41328368 forward strand                                                                                                        | -0.25                 | 0.044   | 1.000           |
| Gm13308                    | NM_001177580               | ref Mus musculus predicted gene 13308 (Gm13308), mRNA [NM_001177580]                                                                                 | -0.25                 | 0.032   | 1.000           |
| chr13:53097579-53113554_F  | chr13:53097579-53113554_F  | lincRNA:chr13:53097579-53113554 forward strand                                                                                                       | -0.25                 | 0.020   | 0.897           |
| Gm14446                    | NM_001110517               | ref Mus musculus predicted gene 14446 (Gm14446), transcript variant 1, mRNA [NM_001110517]                                                           | -0.25                 | 0.010   | 0.743           |
| chr4:155560050-155570900_R | chr4:155560050-155570900_R | lincRNA:chr4:155560050-155570900 reverse strand                                                                                                      | -0.26                 | 0.036   | 1.000           |
| Gdpd3                      | NM_024228                  | ref Mus musculus glycerophosphodiester phosphodiesterase domain containing 3 (Gdpd3), mRNA [NM_024228]                                               | -0.26                 | 0.013   | 0.808           |
| Pbxip1                     | NM_146131                  | ref Mus musculus pre-B-cell leukemia transcription factor interacting protein 1 (Pbxip1), mRNA [NM_146131]                                           | -0.26                 | 0.002   | 0.392           |
| chr16:44717531-44724206_R  | chr16:44717531-44724206_R  | lincRNA:chr16:44717531-44724206 reverse strand                                                                                                       | -0.26                 | 0.016   | 0.848           |
| Prom1                      | NM_001163577               | ref Mus musculus prominin 1 (Prom1), transcript variant 2, mRNA [NM_001163577]                                                                       | -0.26                 | 0.019   | 0.881           |
| chr11:53592946-53637922_F  | chr11:53592946-53637922_F  | lincRNA:chr11:53592946-53637922 forward strand                                                                                                       | -0.26                 | 0.033   | 1.000           |
| Cd82                       | NM_007656                  | ref Mus musculus CD82 antigen (Cd82), transcript variant 1, mRNA [NM_007656]                                                                         | -0.26                 | 0.014   | 0.826           |

Online Supplemental Table IV: mG4H-Veh Only

| Gene Symbol                 | RefSeq                      | Description                                                                                                                                 | logFC<br>mG4H-<br>Veh | P-value | Adj.<br>P-value |
|-----------------------------|-----------------------------|---------------------------------------------------------------------------------------------------------------------------------------------|-----------------------|---------|-----------------|
| Nfkbib                      | NM_010908                   | ref Mus musculus nuclear factor of kappa light polypeptide gene enhancer in B-cells inhibitor, beta (Nfkbib), mRNA [NM_010908]              | -0.26                 | 0.007   | 0.685           |
| Ccdc89                      | NM_027298                   | ref Mus musculus coiled-coil domain containing 89 (Ccdc89), mRNA [NM_027298]                                                                | -0.26                 | 0.047   | 1.000           |
| Zdhhc12                     | NM_025428                   | ref Mus musculus zinc finger, DHHC domain containing 12 (Zdhhc12), transcript variant 1, mRNA [NM_025428]                                   | -0.26                 | 0.012   | 0.786           |
| Crebl2                      | NM_177687                   | ref Mus musculus cAMP responsive element binding protein-like 2 (Crebl2), mRNA [NM_177687]                                                  | -0.26                 | 0.016   | 0.848           |
| Atp2a1                      | NM_007504                   | ref Mus musculus ATPase, Ca++ transporting, cardiac muscle, fast twitch 1 (Atp2a1), mRNA [NM_007504]                                        | -0.26                 | 0.013   | 0.802           |
| Mcl1                        | NM_008562                   | ref Mus musculus myeloid cell leukemia sequence 1 (Mcl1), mRNA [NM_008562]                                                                  | -0.26                 | 0.014   | 0.818           |
| H2-Q2                       | NM_010392                   | ref Mus musculus histocompatibility 2, Q region locus 2 (H2-Q2), mRNA [NM_010392]                                                           | -0.26                 | 0.012   | 0.786           |
| Cd82                        | NM_001136055                | ref Mus musculus CD82 antigen (Cd82), transcript variant 2, mRNA [NM_001136055]                                                             | -0.26                 | 0.019   | 0.883           |
| Rnf144a                     | NM_080563                   | ref Mus musculus ring finger protein 144A (Rnf144a), transcript variant 2, mRNA [NM_080563]                                                 | -0.26                 | 0.019   | 0.880           |
| chr16:91187988-91188416_R   | chr16:91187988-91188416_R   | lincRNA:chr16:91187988-91188416 reverse strand                                                                                              | -0.26                 | 0.038   | 1.000           |
| chr17:26911397-26917047_F   | chr17:26911397-26917047_F   | lincRNA:chr17:26911397-26917047 forward strand                                                                                              | -0.26                 | 0.039   | 1.000           |
| chr10:126818382-126856582_R | chr10:126818382-126856582_R | lincRNA:chr10:126818382-126856582 reverse strand                                                                                            | -0.26                 | 0.028   | 0.983           |
| Clcnkb                      | NM_019701                   | ref Mus musculus chloride channel Kb (Clcnkb), mRNA [NM_019701]                                                                             | -0.26                 | 0.035   | 1.000           |
| chr3:146629425-146649125_R  | chr3:146629425-146649125_R  | lincRNA:chr3:146629425-146649125 reverse strand                                                                                             | -0.26                 | 0.039   | 1.000           |
| ENSMUST00000116010          | ENSMUST00000116010          | ens predicted gene 7030 Pseudogene [Source:MGI Symbol;Acc:MGI:3647514] [ENSMUST00000116010]                                                 | -0.26                 | 0.011   | 0.770           |
| BY201563                    | BY201563                    | gb BY201563 RIKEN full-length enriched, B6-derived CD11 +ve dendritic cells Mus musculus cDNA clone F730107H14 5', mRNA sequence [BY201563] | -0.26                 | 0.020   | 0.897           |
| H2-Q7                       | NM_010394                   | ref Mus musculus histocompatibility 2, Q region locus 7 (H2-Q7), mRNA [NM_010394]                                                           | -0.27                 | 0.012   | 0.786           |
| Aldh2                       | NM_009656                   | ref Mus musculus aldehyde dehydrogenase 2, mitochondrial (Aldh2), nuclear gene encoding mitochondrial protein, mRNA [NM_009656]             | -0.27                 | 0.007   | 0.664           |
| LOC677644                   | XR_034968                   | ref PREDICTED: Mus musculus similar to HLA-G protein (LOC677644), misc RNA [XR_034968]                                                      | -0.27                 | 0.009   | 0.731           |
| App12                       | NM_145220                   | ref Mus musculus adaptor protein, phosphotyrosine interaction, PH domain and leucine zipper containing 2 (App12), mRNA [NM_145220]          | -0.27                 | 0.019   | 0.883           |
| chr5:75389503-75396250_F    | chr5:75389503-75396250_F    | lincRNA:chr5:75389503-75396250 forward strand                                                                                               | -0.27                 | 0.014   | 0.816           |
| Colec11                     | NM_027866                   | ref Mus musculus collectin sub-family member 11 (Colec11), mRNA [NM_027866]                                                                 | -0.27                 | 0.003   | 0.496           |
| chr12:52880692-52933444_F   | chr12:52880692-52933444_F   | lincRNA:chr12:52880692-52933444 forward strand                                                                                              | -0.27                 | 0.024   | 0.957           |
| chr2:158169020-158191295_R  | chr2:158169020-158191295_R  | lincRNA:chr2:158169020-158191295 reverse strand                                                                                             | -0.27                 | 0.038   | 1.000           |
| Rag1ap1                     | NM_009057                   | ref Mus musculus recombination activating gene 1 activating protein 1 (Rag1ap1), mRNA [NM_009057]                                           | -0.27                 | 0.015   | 0.832           |
| Gm7854                      | NR_028417                   | ref Mus musculus predicted gene 7854 (Gm7854), non-coding RNA [NR_028417]                                                                   | -0.27                 | 0.044   | 1.000           |
| Gramd1c                     | NM_153528                   | ref Mus musculus GRAM domain containing 1C (Gramd1c), transcript variant 1, mRNA [NM_153528]                                                | -0.27                 | 0.012   | 0.786           |

| Online Supplemental Table IV: mG4H-Veh Only |                            |                                                                                                                                  |                       |         |                 |
|---------------------------------------------|----------------------------|----------------------------------------------------------------------------------------------------------------------------------|-----------------------|---------|-----------------|
| Gene Symbol                                 | RefSeq                     | Description                                                                                                                      | logFC<br>mG4H-<br>Veh | P-value | Adj.<br>P-value |
| Wbscr25                                     | NR_026907                  | ref Mus musculus Williams Beuren syndrome chromosome region 25 (human) (Wbscr25), non-coding RNA [NR_026907]                     | -0.27                 | 0.047   | 1.000           |
| Nmb                                         | NM_026523                  | ref Mus musculus neuromedin B (Nmb), mRNA [NM_026523]                                                                            | -0.27                 | 0.038   | 1.000           |
| Skap2                                       | NM_018773                  | ref Mus musculus src family associated phosphoprotein 2 (Skap2), mRNA [NM_018773]                                                | -0.27                 | 0.010   | 0.764           |
| chr12:89479525-89503525_F                   | chr12:89479525-89503525_F  | lincRNA:chr12:89479525-89503525 forward strand                                                                                   | -0.27                 | 0.016   | 0.851           |
| Azi1                                        | NM_009734                  | ref Mus musculus 5-azacytidine induced gene 1 (Azi1), mRNA [NM_009734]                                                           | -0.27                 | 0.003   | 0.495           |
| Arrdc1                                      | NM_178408                  | ref Mus musculus arrestin domain containing 1 (Arrdc1), transcript variant 2, mRNA [NM_178408]                                   | -0.27                 | 0.028   | 0.983           |
| Lrrc10                                      | NM_146242                  | ref Mus musculus leucine rich repeat containing 10 (Lrrc10), mRNA [NM_146242]                                                    | -0.27                 | 0.039   | 1.000           |
| Cdv3                                        | NM_001134426               | ref Mus musculus carnitine deficiency-associated gene expressed in ventricle 3 (Cdv3), transcript variant 3, mRNA [NM_001134426] | -0.27                 | 0.021   | 0.912           |
| chr15:62090565-62091770_F                   | chr15:62090565-62091770_F  | lincRNA:chr15:62090565-62091770 forward strand                                                                                   | -0.27                 | 0.045   | 1.000           |
| Ankzf1                                      | NM_026187                  | ref Mus musculus ankyrin repeat and zinc finger domain containing 1 (Ankzf1), mRNA [NM_026187]                                   | -0.27                 | 0.004   | 0.516           |
| Eno4                                        | NM_178689                  | ref Mus musculus enolase 4 (Eno4), mRNA [NM_178689]                                                                              | -0.27                 | 0.047   | 1.000           |
| Slc25a33                                    | NM_027460                  | ref Mus musculus solute carrier family 25, member 33 (Slc25a33), mRNA [NM_027460]                                                | -0.27                 | 0.008   | 0.697           |
| chr7:137486825-137498500_F                  | chr7:137486825-137498500_F | lincRNA:chr7:137486825-137498500 forward strand                                                                                  | -0.27                 | 0.050   | 1.000           |
| S100a1                                      | NM_011309                  | ref Mus musculus S100 calcium binding protein A1 (S100a1), mRNA [NM_011309]                                                      | -0.28                 | 0.003   | 0.440           |
| Snx25                                       | NM_207213                  | ref Mus musculus sorting nexin 25 (Snx25), mRNA [NM_207213]                                                                      | -0.28                 | 0.039   | 1.000           |
| 1700111N16Rik                               | NR_033213                  | ref Mus musculus RIKEN cDNA 1700111N16 gene (1700111N16Rik), non-coding RNA [NR_033213]                                          | -0.28                 | 0.048   | 1.000           |
| LOC100048396                                | XR_034680                  | ref PREDICTED: Mus musculus hypothetical protein LOC100048396 (LOC100048396), misc RNA [XR_034680]                               | -0.28                 | 0.048   | 1.000           |
| chr17:26911397-26917047_F                   | chr17:26911397-26917047_F  | lincRNA:chr17:26911397-26917047 forward strand                                                                                   | -0.28                 | 0.029   | 0.992           |
| Htr7                                        | NM_008315                  | ref Mus musculus 5-hydroxytryptamine (serotonin) receptor 7 (Htr7), mRNA [NM_008315]                                             | -0.28                 | 0.049   | 1.000           |
| Eml2                                        | NM_028153                  | ref Mus musculus echinoderm microtubule associated protein like 2 (Eml2), transcript variant 1, mRNA [NM_028153]                 | -0.28                 | 0.001   | 0.263           |
| Olfir27                                     | NM_146829                  | ref Mus musculus olfactory receptor 27 (Olfir27), mRNA [NM_146829]                                                               | -0.28                 | 0.038   | 1.000           |
| Gm4062                                      | XM_001478924               | ref PREDICTED: Mus musculus hypothetical protein LOC100042845 (LOC100042845), mRNA [XM_001478924]                                | -0.28                 | 0.037   | 1.000           |
| H2-D1                                       | NM_010380                  | ref Mus musculus histocompatibility 2, D region locus 1 (H2-D1), mRNA [NM_010380]                                                | -0.28                 | 0.009   | 0.730           |
| chr6:90745692-90777977_F                    | chr6:90745692-90777977_F   | lincRNA:chr6:90745692-90777977 forward strand                                                                                    | -0.28                 | 0.049   | 1.000           |
| Olfir521                                    | NM_146356                  | ref Mus musculus olfactory receptor 521 (Olfir521), mRNA [NM_146356]                                                             | -0.28                 | 0.048   | 1.000           |
| Fmnl2                                       | NM_172409                  | ref Mus musculus formin-like 2 (Fmnl2), mRNA [NM_172409]                                                                         | -0.28                 | 0.005   | 0.621           |



Online Supplemental Table IV: mG4H-Veh Only

| Gene Symbol               | RefSeq                    | Description                                                                                                                                             | logFC<br>mG4H-<br>Veh | P-value | Adj.<br>P-value |
|---------------------------|---------------------------|---------------------------------------------------------------------------------------------------------------------------------------------------------|-----------------------|---------|-----------------|
| Oat                       | NM_016978                 | ref Mus musculus ornithine aminotransferase (Oat), nuclear gene encoding mitochondrial protein, mRNA [NM_016978]                                        | -0.28                 | 0.005   | 0.583           |
| Gm4603                    | XM_001480803              | ref PREDICTED: Mus musculus similar to cyclic nucleotide gated channel beta 1 (LOC100043717), mRNA [XM_001480803]                                       | -0.28                 | 0.022   | 0.935           |
| chr7:77481448-77495548_F  | chr7:77481448-77495548_F  | lincRNA:chr7:77481448-77495548 forward strand                                                                                                           | -0.28                 | 0.045   | 1.000           |
| chr8:71526892-71527500_R  | chr8:71526892-71527500_R  | lincRNA:chr8:71526892-71527500 reverse strand                                                                                                           | -0.28                 | 0.023   | 0.942           |
| Gipc2                     | NM_016867                 | ref Mus musculus GIPC PDZ domain containing family, member 2 (Gipc2), mRNA [NM_016867]                                                                  | -0.29                 | 0.016   | 0.848           |
| chr17:26911397-26917047_F | chr17:26911397-26917047_F | lincRNA:chr17:26911397-26917047 forward strand                                                                                                          | -0.29                 | 0.032   | 1.000           |
| Uap1l1                    | NM_001033293              | ref Mus musculus UDP-N-acetylglucosamine pyrophosphorylase 1-like 1 (Uap1l1), mRNA [NM_001033293]                                                       | -0.29                 | 0.003   | 0.500           |
| Bsph1                     | NM_001033418              | ref Mus musculus binder of sperm protein homolog 1 (Bsph1), mRNA [NM_001033418]                                                                         | -0.29                 | 0.021   | 0.897           |
| Arfgap3                   | NM_025445                 | ref Mus musculus ADP-ribosylation factor GTPase activating protein 3 (Arfgap3), mRNA [NM_025445]                                                        | -0.29                 | 0.030   | 0.998           |
| Tdgf1                     | NM_011562                 | ref Mus musculus teratocarcinoma-derived growth factor 1 (Tdgf1), mRNA [NM_011562]                                                                      | -0.29                 | 0.033   | 1.000           |
| LOC100047388              | XM_001478042              | ref PREDICTED: Mus musculus similar to H2-T18 protein (LOC100047388), mRNA [XM_001478042]                                                               | -0.29                 | 0.002   | 0.377           |
| Tnk1                      | NM_031880                 | ref Mus musculus tyrosine kinase, non-receptor, 1 (Tnk1), mRNA [NM_031880]                                                                              | -0.29                 | 0.048   | 1.000           |
| Echdc2                    | NM_026728                 | ref Mus musculus enoyl Coenzyme A hydratase domain containing 2 (Echdc2), mRNA [NM_026728]                                                              | -0.29                 | 0.002   | 0.413           |
| 4930579G22Rik             | NM_026916                 | ref Mus musculus RIKEN cDNA 4930579G22 gene (4930579G22Rik), mRNA [NM_026916]                                                                           | -0.29                 | 0.006   | 0.655           |
| Il1rl1                    | NM_001025602              | ref Mus musculus interleukin 1 receptor-like 1 (Il1rl1), transcript variant 1, mRNA [NM_001025602]                                                      | -0.29                 | 0.001   | 0.331           |
| 6430590A07Rik             | AK048316                  | gb Mus musculus 16 days embryo head cDNA, RIKEN full-length enriched library, clone:C130048L12 product:unclassifiable, full insert sequence. [AK048316] | -0.29                 | 0.027   | 0.981           |
| chr13:74642700-74701900_R | chr13:74642700-74701900_R | lincRNA:chr13:74642700-74701900 reverse strand                                                                                                          | -0.29                 | 0.015   | 0.832           |
| Gpr61                     | NM_175470                 | ref Mus musculus G protein-coupled receptor 61 (Gpr61), mRNA [NM_175470]                                                                                | -0.29                 | 0.012   | 0.793           |
| Gm7035                    | NR_004446                 | ref Mus musculus predicted pseudogene 7035 (Gm7035), non-coding RNA [NR_004446]                                                                         | -0.29                 | 0.009   | 0.715           |
| H2afb2-ps                 | XM_888672                 | ref PREDICTED: Mus musculus predicted gene, EG624153 (EG624153), mRNA [XM_888672]                                                                       | -0.30                 | 0.039   | 1.000           |
| Col23a1                   | NM_153393                 | ref Mus musculus collagen, type XXIII, alpha 1 (Col23a1), mRNA [NM_153393]                                                                              | -0.30                 | 0.019   | 0.881           |
| 2010107H07Rik             | NR_024069                 | ref Mus musculus RIKEN cDNA 2010107H07 gene (2010107H07Rik), non-coding RNA [NR_024069]                                                                 | -0.30                 | 0.001   | 0.214           |
| H2-K1                     | NM_001001892              | ref Mus musculus histocompatibility 2, K1, K region (H2-K1), transcript variant 1, mRNA [NM_001001892]                                                  | -0.30                 | 0.005   | 0.578           |
| Lpl                       | NM_008509                 | ref Mus musculus lipoprotein lipase (Lpl), mRNA [NM_008509]                                                                                             | -0.30                 | 0.002   | 0.343           |
| Gm7035                    | NR_004446                 | ref Mus musculus predicted pseudogene 7035 (Gm7035), non-coding RNA [NR_004446]                                                                         | -0.30                 | 0.005   | 0.621           |
| chr13:98221098-98480773_R | chr13:98221098-98480773_R | lincRNA:chr13:98221098-98480773 reverse strand                                                                                                          | -0.30                 | 0.044   | 1.000           |
| chr15:97925615-97926199_F | chr15:97925615-97926199_F | lincRNA:chr15:97925615-97926199 forward strand                                                                                                          | -0.30                 | 0.010   | 0.746           |
| ENSMUST00000098407        | ENSMUST00000098407        | ens junction adhesion molecule 2 Gene [Source:MGI (curated);Acc:MGI:1933820] [ENSMUST00000098407]                                                       | -0.30                 | 0.031   | 1.000           |

| Online Supplemental Table IV: mG4H-Veh Only |                             |                                                                                                                                                            |                       |         |                 |
|---------------------------------------------|-----------------------------|------------------------------------------------------------------------------------------------------------------------------------------------------------|-----------------------|---------|-----------------|
| Gene Symbol                                 | RefSeq                      | Description                                                                                                                                                | logFC<br>mG4H-<br>Veh | P-value | Adj.<br>P-value |
| Zfp771                                      | NM_177362                   | ref Mus musculus zinc finger protein 771 (Zfp771), mRNA [NM_177362]                                                                                        | -0.30                 | 0.001   | 0.227           |
| chr5:37051650-37110575_F                    | chr5:37051650-37110575_F    | lincRNA:chr5:37051650-37110575 forward strand                                                                                                              | -0.30                 | 0.044   | 1.000           |
| chr11:87872568-87880978_R                   | chr11:87872568-87880978_R   | lincRNA:chr11:87872568-87880978 reverse strand                                                                                                             | -0.30                 | 0.050   | 1.000           |
| chr8:125031410-125075960_F                  | chr8:125031410-125075960_F  | lincRNA:chr8:125031410-125075960 forward strand                                                                                                            | -0.30                 | 0.026   | 0.973           |
| Ascl3                                       | NM_020051                   | ref Mus musculus achaete-scute complex homolog 3 (Drosophila) (Ascl3), mRNA [NM_020051]                                                                    | -0.30                 | 0.022   | 0.924           |
| chr2:75484041-75484815_R                    | chr2:75484041-75484815_R    | lincRNA:chr2:75484041-75484815 reverse strand                                                                                                              | -0.30                 | 0.029   | 0.991           |
| chr8:122787689-122788088_R                  | chr8:122787689-122788088_R  | lincRNA:chr8:122787689-122788088 reverse strand                                                                                                            | -0.30                 | 0.027   | 0.983           |
| GaInt12                                     | ENSMUST000000022460         | ens UDP-N-acetyl-alpha-D-galactosamine:polypeptide N-acetylgalactosaminyltransferase-like 2 Gene [Source:MGI Symbol;Acc:MGI:1926004] [ENSMUST000000022460] | -0.30                 | 0.005   | 0.589           |
| ENSMUST00000070378                          | ENSMUST00000070378          | ens RIKEN cDNA 1810010K12 gene Gene [Source:MGI Symbol;Acc:MGI:1921419] [ENSMUST00000070378]                                                               | -0.30                 | 0.036   | 1.000           |
| Polg                                        | NM_017462                   | ref Mus musculus polymerase (DNA directed), gamma (Polg), mRNA [NM_017462]                                                                                 | -0.30                 | 0.001   | 0.263           |
| Slc25a33                                    | NM_027460                   | ref Mus musculus solute carrier family 25, member 33 (Slc25a33), mRNA [NM_027460]                                                                          | -0.30                 | 0.006   | 0.628           |
| LOC100039088                                | XM_001472029                | ref PREDICTED: Mus musculus hypothetical protein LOC100039088 (LOC100039088), mRNA [XM_001472029]                                                          | -0.31                 | 0.013   | 0.808           |
| H2-Q5                                       | NM_010393                   | ref Mus musculus histocompatibility 2, Q region locus 5 (H2-Q5), mRNA [NM_010393]                                                                          | -0.31                 | 0.002   | 0.407           |
| ENSMUST00000115614                          | ENSMUST00000115614          | ens amadi110 repeat gene deleted in velo-cardio-facial syndrome Gene [Source:MGI (curated);Acc:MGI:109620] [ENSMUST00000115614]                            | -0.31                 | 0.014   | 0.825           |
| Cntn5                                       | NM_001170787                | ref Mus musculus contactin 5 (Cntn5), transcript variant 1, mRNA [NM_001170787]                                                                            | -0.31                 | 0.019   | 0.881           |
| chr15:82037381-82048125_F                   | chr15:82037381-82048125_F   | lincRNA:chr15:82037381-82048125 forward strand                                                                                                             | -0.31                 | 0.016   | 0.851           |
| Slc47a1                                     | NM_026183                   | ref Mus musculus solute carrier family 47, member 1 (Slc47a1), mRNA [NM_026183]                                                                            | -0.31                 | 0.046   | 1.000           |
| LOC100047782                                | XM_001478860                | ref PREDICTED: Mus musculus similar to crooked legs CG14938-PB (LOC100047782), mRNA [XM_001478860]                                                         | -0.31                 | 0.021   | 0.904           |
| chr12:111617728-111665403_R                 | chr12:111617728-111665403_R | lincRNA:chr12:111617728-111665403 reverse strand                                                                                                           | -0.31                 | 0.045   | 1.000           |
| Cnih3                                       | NM_028408                   | ref Mus musculus cornichon homolog 3 (Drosophila) (Cnih3), transcript variant 1, mRNA [NM_028408]                                                          | -0.31                 | 0.036   | 1.000           |
| chr8:129336539-129400338_R                  | chr8:129336539-129400338_R  | lincRNA:chr8:129336539-129400338 reverse strand                                                                                                            | -0.31                 | 0.041   | 1.000           |
| chr10:120116843-120182671_R                 | chr10:120116843-120182671_R | lincRNA:chr10:120116843-120182671 reverse strand                                                                                                           | -0.31                 | 0.043   | 1.000           |
| Ppfbp2                                      | NM_008905                   | ref Mus musculus PTPRF interacting protein, binding protein 2 (liprin beta 2) (Ppfbp2), transcript variant 1, mRNA [NM_008905]                             | -0.31                 | 0.003   | 0.508           |
| Odf2                                        | NM_001113214                | ref Mus musculus outer dense fiber of sperm tails 2 (Odf2), transcript variant 2, mRNA [NM_001113214]                                                      | -0.31                 | 0.002   | 0.395           |
| Acss1                                       | NM_080575                   | ref Mus musculus acyl-CoA synthetase short-chain family member 1 (Acss1), nuclear gene encoding mitochondrial protein, mRNA [NM_080575]                    | -0.31                 | 0.003   | 0.488           |
| Hcrtr1                                      | NM_198959                   | ref Mus musculus hypocretin (orexin) receptor 1 (Hcrtr1), transcript variant 1, mRNA [NM_198959]                                                           | -0.31                 | 0.048   | 1.000           |
| H2-Q6                                       | NM_207648                   | ref Mus musculus histocompatibility 2, Q region locus 6 (H2-Q6), mRNA [NM_207648]                                                                          | -0.31                 | 0.004   | 0.550           |

Online Supplemental Table IV: mG4H-Veh Only

| Gene Symbol                       | RefSeq                     | Description                                                                                                                                                                  | logFC<br>mG4H-<br>Veh | P-value | Adj.<br>P-value |
|-----------------------------------|----------------------------|------------------------------------------------------------------------------------------------------------------------------------------------------------------------------|-----------------------|---------|-----------------|
| <b>Spr2d</b>                      | NM_011470                  | ref Mus musculus small proline-rich protein 2D (Spr2d), mRNA [NM_011470]                                                                                                     | -0.31                 | 0.040   | 1.000           |
| <b>Naglu</b>                      | NM_013792                  | ref Mus musculus alpha-N-acetylglucosaminidase (Sanfilippo disease IIIB) (Naglu), mRNA [NM_013792]                                                                           | -0.31                 | 0.002   | 0.384           |
| <b>chr5:139230332-139230823_R</b> | chr5:139230332-139230823_R | lincRNA:chr5:139230332-139230823 reverse strand                                                                                                                              | -0.31                 | 0.006   | 0.648           |
| <b>chr16:9129538-9137898_R</b>    | chr16:9129538-9137898_R    | lincRNA:chr16:9129538-9137898 reverse strand                                                                                                                                 | -0.32                 | 0.044   | 1.000           |
| <b>Ppl</b>                        | NM_008909                  | ref Mus musculus periplakin (Ppl), mRNA [NM_008909]                                                                                                                          | -0.32                 | 0.011   | 0.774           |
| <b>chr2:35829956-35830757_R</b>   | chr2:35829956-35830757_R   | lincRNA:chr2:35829956-35830757 reverse strand                                                                                                                                | -0.32                 | 0.018   | 0.873           |
| <b>ENSMUST00000113874</b>         | ENSMUST00000113874         | ens histocompatibility 2, Q region locus 1 Gene [Source:MGI Symbol;Acc:MGI:95928] [ENSMUST00000113874]                                                                       | -0.32                 | 0.006   | 0.624           |
| <b>Mfsd7c</b>                     | NM_145447                  | ref Mus musculus major facilitator superfamily domain containing 7C (Mfsd7c), mRNA [NM_145447]                                                                               | -0.32                 | 0.007   | 0.675           |
| <b>0610008F07Rik</b>              | NR_027970                  | ref Mus musculus RIKEN cDNA 0610008F07 gene (0610008F07Rik), non-coding RNA [NR_027970]                                                                                      | -0.32                 | 0.049   | 1.000           |
| <b>2310006M14Rik</b>              | XR_033650                  | ref PREDICTED: Mus musculus RIKEN cDNA 2310006M14 gene (2310006M14Rik), misc RNA [XR_033650]                                                                                 | -0.32                 | 0.039   | 1.000           |
| <b>LOC100040974</b>               | XR_032320                  | ref PREDICTED: Mus musculus similar to RIKEN cDNA 5830484A20 gene (LOC100040974), misc RNA [XR_032320]                                                                       | -0.32                 | 0.038   | 1.000           |
| <b>ENSMUST00000077662</b>         | ENSMUST00000077662         | ens histocompatibility 2, M region locus 2 Gene [Source:MGI Symbol;Acc:MGI:95914] [ENSMUST00000077662]                                                                       | -0.32                 | 0.014   | 0.825           |
| <b>chr6:31017987-31174287_R</b>   | chr6:31017987-31174287_R   | lincRNA:chr6:31017987-31174287 reverse strand                                                                                                                                | -0.32                 | 0.043   | 1.000           |
| <b>chr17:26911397-26917047_F</b>  | chr17:26911397-26917047_F  | lincRNA:chr17:26911397-26917047 forward strand                                                                                                                               | -0.32                 | 0.010   | 0.758           |
| <b>Ccdc159</b>                    | NM_025977                  | ref Mus musculus coiled-coil domain containing 159 (Ccdc159), transcript variant 2, mRNA [NM_025977]                                                                         | -0.32                 | 0.019   | 0.881           |
| <b>chr12:88154776-88184372_R</b>  | chr12:88154776-88184372_R  | lincRNA:chr12:88154776-88184372 reverse strand                                                                                                                               | -0.32                 | 0.035   | 1.000           |
| <b>Tyro3</b>                      | NM_019392                  | ref Mus musculus TYRO3 protein tyrosine kinase 3 (Tyr3), mRNA [NM_019392]                                                                                                    | -0.32                 | 0.005   | 0.590           |
| <b>chr13:94182877-94203852_F</b>  | chr13:94182877-94203852_F  | lincRNA:chr13:94182877-94203852 forward strand                                                                                                                               | -0.32                 | 0.041   | 1.000           |
| <b>Nfkbib</b>                     | NM_010908                  | ref Mus musculus nuclear factor of kappa light polypeptide gene enhancer in B-cells inhibitor, beta (Nfkbib), mRNA [NM_010908]                                               | -0.32                 | 0.001   | 0.261           |
| <b>Pet112l</b>                    | NM_144896                  | ref Mus musculus PET112-like (yeast) (Pet112l), nuclear gene encoding mitochondrial protein, mRNA [NM_144896]                                                                | -0.32                 | 0.000   | 0.162           |
| <b>chr17:26911397-26917047_F</b>  | chr17:26911397-26917047_F  | lincRNA:chr17:26911397-26917047 forward strand                                                                                                                               | -0.32                 | 0.011   | 0.770           |
| <b>4833419E13Rik</b>              | AK014724                   | gb Mus musculus 0 day neonate head cDNA, RIKEN full-length enriched library, clone:4833419E13 product:inferred: RIKEN cDNA 4833419E13 gene, full insert sequence. [AK014724] | -0.32                 | 0.027   | 0.982           |
| <b>ENSMUST00000110990</b>         | ENSMUST00000110990         | ens OTTMUSG00000022819 protein [Source:UniProtKB/TrEMBL;Acc:Q8R020] [ENSMUST00000110990]                                                                                     | -0.32                 | 0.049   | 1.000           |
| <b>Gon4l</b>                      | XM_001478845               | ref PREDICTED: Mus musculus RIKEN cDNA 5830417I10 gene (5830417I10Rik), mRNA [XM_001478845]                                                                                  | -0.32                 | 0.049   | 1.000           |
| <b>Gm4282</b>                     | XM_001476842               | ref PREDICTED: Mus musculus hypothetical protein LOC100046131 (LOC100046131), mRNA [XM_001476842]                                                                            | -0.32                 | 0.028   | 0.984           |

Online Supplemental Table IV: mG4H-Veh Only

| Gene Symbol                 | RefSeq                      | Description                                                                                                                                                 | logFC<br>mG4H-<br>Veh | P-value | Adj.<br>P-value |
|-----------------------------|-----------------------------|-------------------------------------------------------------------------------------------------------------------------------------------------------------|-----------------------|---------|-----------------|
| Slc19a1                     | NM_031196                   | ref Mus musculus solute carrier family 19 (sodium/hydrogen exchanger), member 1 (Slc19a1), mRNA [NM_031196]                                                 | -0.32                 | 0.024   | 0.954           |
| chr10:117021051-117038683_R | chr10:117021051-117038683_R | lincRNA:chr10:117021051-117038683 reverse strand                                                                                                            | -0.33                 | 0.021   | 0.909           |
| 1700061G19Rik               | NM_030141                   | ref Mus musculus RIKEN cDNA 1700061G19 gene (1700061G19Rik), mRNA [NM_030141]                                                                               | -0.33                 | 0.013   | 0.812           |
| Fzd5                        | NM_022721                   | ref Mus musculus frizzled homolog 5 (Drosophila) (Fzd5), transcript variant 1, mRNA [NM_022721]                                                             | -0.33                 | 0.025   | 0.960           |
| Aldh6a1                     | NM_134042                   | ref Mus musculus aldehyde dehydrogenase family 6, subfamily A1 (Aldh6a1), nuclear gene encoding mitochondrial protein, mRNA [NM_134042]                     | -0.33                 | 0.001   | 0.261           |
| E230028L10Rik               | ENSIMUST00000105593         | ens RIKEN cDNA E230028L10 gene Gene [Source:MGI Symbol;Acc:MGI:2685285] [ENSIMUST00000105593]                                                               | -0.33                 | 0.048   | 1.000           |
| Echdc2                      | NM_026728                   | ref Mus musculus enoyl Coenzyme A hydratase domain containing 2 (Echdc2), mRNA [NM_026728]                                                                  | -0.33                 | 0.002   | 0.357           |
| Gm5607                      | NR_027975                   | ref Mus musculus predicted gene 5607 (Gm5607), non-coding RNA [NR_027975]                                                                                   | -0.33                 | 0.004   | 0.568           |
| chr17:95158347-95160942_F   | chr17:95158347-95160942_F   | lincRNA:chr17:95158347-95160942 forward strand                                                                                                              | -0.33                 | 0.029   | 0.988           |
| Ccdc85a                     | NM_181577                   | ref Mus musculus coiled-coil domain containing 85A (Ccdc85a), transcript variant 1, mRNA [NM_181577]                                                        | -0.33                 | 0.045   | 1.000           |
| Snap91                      | NM_013669                   | ref Mus musculus synaptosomal-associated protein 91 (Snap91), mRNA [NM_013669]                                                                              | -0.33                 | 0.028   | 0.986           |
| Olf1058                     | NM_146391                   | ref Mus musculus olfactory receptor 1058 (Olf1058), mRNA [NM_146391]                                                                                        | -0.33                 | 0.046   | 1.000           |
| 4930471G03Rik               | BU938417                    | gb AGENCOURT_10518739 NIH_MGC_169 Mus musculus cDNA clone IMAGE:6706548 5', mRNA sequence [BU938417]                                                        | -0.33                 | 0.032   | 1.000           |
| Dbp                         | NM_016974                   | ref Mus musculus D site albumin promoter binding protein (Dbp), mRNA [NM_016974]                                                                            | -0.33                 | 0.027   | 0.983           |
| chr18:78190463-78235438_R   | chr18:78190463-78235438_R   | lincRNA:chr18:78190463-78235438 reverse strand                                                                                                              | -0.33                 | 0.042   | 1.000           |
| Ankrd36                     | NM_023816                   | ref Mus musculus ankyrin repeat domain 36 (Ankrd36), mRNA [NM_023816]                                                                                       | -0.33                 | 0.020   | 0.895           |
| chr8:13507348-13543773_R    | chr8:13507348-13543773_R    | lincRNA:chr8:13507348-13543773 reverse strand                                                                                                               | -0.33                 | 0.041   | 1.000           |
| Scrt1                       | NM_130893                   | ref Mus musculus scratch homolog 1, zinc finger protein (Drosophila) (Scrt1), mRNA [NM_130893]                                                              | -0.33                 | 0.011   | 0.766           |
| Ln timer                    | NM_001159577                | ref Mus musculus ligand of numb-protein X 1 (Ln timer), transcript variant 1, mRNA [NM_001159577]                                                           | -0.33                 | 0.032   | 1.000           |
| Clstn3                      | NM_153508                   | ref Mus musculus calyculin 3 (Clstn3), mRNA [NM_153508]                                                                                                     | -0.34                 | 0.018   | 0.876           |
| Hrk                         | NM_007545                   | ref Mus musculus harakiri, BCL2 interacting protein (contains only BH3 domain) (Hrk), mRNA [NM_007545]                                                      | -0.34                 | 0.017   | 0.858           |
| chr9:56910620-56919667_F    | chr9:56910620-56919667_F    | lincRNA:chr9:56910620-56919667 forward strand                                                                                                               | -0.34                 | 0.028   | 0.983           |
| 9230112J17Rik               | AK038653                    | gb Mus musculus adult male hypothalamus cDNA, RIKEN full-length enriched library, clone:A230052I24 product:unclassifiable, full insert sequence. [AK038653] | -0.34                 | 0.006   | 0.661           |
| Penk                        | NM_001002927                | ref Mus musculus preproenkephalin (Penk), mRNA [NM_001002927]                                                                                               | -0.34                 | 0.007   | 0.686           |
| Gstt2                       | NM_010361                   | ref Mus musculus glutathione S-transferase, theta 2 (Gstt2), mRNA [NM_010361]                                                                               | -0.34                 | 0.002   | 0.409           |
| chr16:50715231-50841124_R   | chr16:50715231-50841124_R   | lincRNA:chr16:50715231-50841124 reverse strand                                                                                                              | -0.34                 | 0.020   | 0.895           |
| Krt78                       | NM_212487                   | ref Mus musculus keratin 78 (Krt78), mRNA [NM_212487]                                                                                                       | -0.34                 | 0.027   | 0.983           |
| chr10:24269165-24276690_F   | chr10:24269165-24276690_F   | lincRNA:chr10:24269165-24276690 forward strand                                                                                                              | -0.34                 | 0.024   | 0.951           |

Online Supplemental Table IV: mG4H-Veh Only

| Gene Symbol                | RefSeq                     | Description                                                                                                                                               | logFC<br>mG4H-<br>Veh | P-value | Adj.<br>P-value |
|----------------------------|----------------------------|-----------------------------------------------------------------------------------------------------------------------------------------------------------|-----------------------|---------|-----------------|
| Slc9a3r1                   | NM_012030                  | ref Mus musculus solute carrier family 9 (sodium/hydrogen exchanger), member 3 regulator 1 (Slc9a3r1), mRNA [NM_012030]                                   | -0.34                 | 0.035   | 1.000           |
| Tmem159                    | NM_145586                  | ref Mus musculus transmembrane protein 159 (Tmem159), mRNA [NM_145586]                                                                                    | -0.34                 | 0.001   | 0.214           |
| A_55_P2232410              | A_55_P2232410              | Unknown                                                                                                                                                   | -0.34                 | 0.020   | 0.891           |
| ENSMUST00000065530         | ENSMUST00000065530         | ens NOL1/NOP2/Sun domain family, member 7 Gene [Source:MGI (curated);Acc:MGI:1918168] [ENSMUST00000065530]                                                | -0.34                 | 0.021   | 0.904           |
| chr19:5771425-5848475_F    | chr19:5771425-5848475_F    | lincRNA:chr19:5771425-5848475 forward strand                                                                                                              | -0.34                 | 0.048   | 1.000           |
| Il3                        | NM_010556                  | ref Mus musculus interleukin 3 (Il3), mRNA [NM_010556]                                                                                                    | -0.34                 | 0.006   | 0.658           |
| Amot                       | NM_153319                  | ref Mus musculus angiomin (Amot), mRNA [NM_153319]                                                                                                        | -0.34                 | 0.031   | 0.998           |
| Prkcz                      | NM_008860                  | ref Mus musculus protein kinase C, zeta (Prkcz), transcript variant 1, mRNA [NM_008860]                                                                   | -0.34                 | 0.023   | 0.935           |
| Sly                        | NM_201530                  | ref Mus musculus Sycp3 like Y-linked (Sly), mRNA [NM_201530]                                                                                              | -0.35                 | 0.019   | 0.881           |
| ENSMUST00000100300         | ENSMUST00000100300         | ens Putative uncharacterized protein [Source:UniProtKB/TrEMBL;Acc:Q3U112] [ENSMUST00000100300]                                                            | -0.35                 | 0.041   | 1.000           |
| H2-T23                     | NM_010398                  | ref Mus musculus histocompatibility 2, T region locus 23 (H2-T23), mRNA [NM_010398]                                                                       | -0.35                 | 0.001   | 0.214           |
| Kbtbd5                     | NM_028202                  | ref Mus musculus kelch repeat and BTB (POZ) domain containing 5 (Kbtbd5), mRNA [NM_028202]                                                                | -0.35                 | 0.001   | 0.214           |
| D6Ertd160e                 | AK053343                   | gb Mus musculus 0 day neonate eyeball cDNA, RIKEN full-length enriched library, clone:E130010007 product:unclassifiable, full insert sequence. [AK053343] | -0.35                 | 0.036   | 1.000           |
| chr10:66349796-66378261_R  | chr10:66349796-66378261_R  | lincRNA:chr10:66349796-66378261 reverse strand                                                                                                            | -0.35                 | 0.032   | 1.000           |
| chr3:34497447-34501170_R   | chr3:34497447-34501170_R   | lincRNA:chr3:34497447-34501170 reverse strand                                                                                                             | -0.35                 | 0.009   | 0.737           |
| LOC630285                  | XR_031378                  | ref PREDICTED: Mus musculus similar to human leucocyte antigen B (LOC630285), misc RNA [XR_031378]                                                        | -0.35                 | 0.001   | 0.263           |
| chr5:113920850-113950200_F | chr5:113920850-113950200_F | lincRNA:chr5:113920850-113950200 forward strand                                                                                                           | -0.35                 | 0.039   | 1.000           |
| AA414903                   | BX513744                   | gb BX513744 Knowles Solter mouse 2 cell Mus musculus cDNA clone IMAGp998E181916 ; IMAGE:777977, mRNA sequence [BX513744]                                  | -0.35                 | 0.036   | 1.000           |
| Myrip                      | NM_144557                  | ref Mus musculus myosin VIIA and Rab interacting protein (Myrip), mRNA [NM_144557]                                                                        | -0.35                 | 0.014   | 0.825           |
| chr5:35893908-35896613_R   | chr5:35893908-35896613_R   | lincRNA:chr5:35893908-35896613 reverse strand                                                                                                             | -0.35                 | 0.027   | 0.975           |
| Vmn1r73                    | NM_134203                  | ref Mus musculus vomeronasal 1 receptor 73 (Vmn1r73), mRNA [NM_134203]                                                                                    | -0.35                 | 0.034   | 1.000           |
| Il17f                      | NM_145856                  | ref Mus musculus interleukin 17F (Il17f), mRNA [NM_145856]                                                                                                | -0.35                 | 0.043   | 1.000           |
| LOC640605                  | XR_034772                  | ref PREDICTED: Mus musculus similar to intelectin 2 (LOC640605), misc RNA [XR_034772]                                                                     | -0.35                 | 0.027   | 0.982           |
| BC021891                   | NM_145608                  | ref Mus musculus cDNA sequence BC021891 (BC021891), mRNA [NM_145608]                                                                                      | -0.35                 | 0.014   | 0.825           |
| Tuft1                      | NM_011656                  | ref Mus musculus tuftelin 1 (Tuft1), mRNA [NM_011656]                                                                                                     | -0.35                 | 0.025   | 0.966           |
| Aldh6a1                    | NM_134042                  | ref Mus musculus aldehyde dehydrogenase family 6, subfamily A1 (Aldh6a1), nuclear gene encoding mitochondrial protein, mRNA [NM_134042]                   | -0.35                 | 0.002   | 0.432           |
| LOC676689                  | XM_992161                  | ref PREDICTED: Mus musculus similar to H-2 class I histocompatibility antigen, L-D alpha chain precursor (LOC676689), mRNA [XM_992161]                    | -0.35                 | 0.002   | 0.404           |

| Online Supplemental Table IV: mG4H-Veh Only |                            |                                                                                                                             |                       |         |                 |
|---------------------------------------------|----------------------------|-----------------------------------------------------------------------------------------------------------------------------|-----------------------|---------|-----------------|
| Gene Symbol                                 | RefSeq                     | Description                                                                                                                 | logFC<br>mG4H-<br>Veh | P-value | Adj.<br>P-value |
| LOC641235                                   | XM_918592                  | ref PREDICTED: Mus musculus similar to MHC class Ib antigen Qa-1c (LOC641235), mRNA [XM_918592]                             | -0.36                 | 0.025   | 0.963           |
| Hoxb5                                       | NM_008268                  | ref Mus musculus homeobox B5 (Hoxb5), mRNA [NM_008268]                                                                      | -0.36                 | 0.012   | 0.787           |
| chr1:193755364-193770539_R                  | chr1:193755364-193770539_R | lincRNA:chr1:193755364-193770539 reverse strand                                                                             | -0.36                 | 0.017   | 0.858           |
| chr9:40031056-40031687_R                    | chr9:40031056-40031687_R   | lincRNA:chr9:40031056-40031687 reverse strand                                                                               | -0.36                 | 0.038   | 1.000           |
| Tuba3a                                      | NM_009446                  | ref Mus musculus tubulin, alpha 3A (Tuba3a), mRNA [NM_009446]                                                               | -0.36                 | 0.042   | 1.000           |
| Tmem120a                                    | NM_172541                  | ref Mus musculus transmembrane protein 120A (Tmem120a), mRNA [NM_172541]                                                    | -0.36                 | 0.001   | 0.261           |
| Gins1                                       | NM_027014                  | ref Mus musculus GINS complex subunit 1 (Psf1 homolog) (Gins1), transcript variant 1, mRNA [NM_027014]                      | -0.36                 | 0.000   | 0.113           |
| LOC630837                                   | XM_904200                  | ref PREDICTED: Mus musculus similar to Ig mu-chain precursor (V76-D-J4), transcript variant 1 (LOC630837), mRNA [XM_904200] | -0.36                 | 0.012   | 0.786           |
| Fam55c                                      | NM_001134494               | ref Mus musculus family with sequence similarity 55, member C (Fam55c), mRNA [NM_001134494]                                 | -0.36                 | 0.010   | 0.743           |
| Atp9b                                       | NM_015805                  | ref Mus musculus ATPase, class II, type 9B (Atp9b), mRNA [NM_015805]                                                        | -0.36                 | 0.006   | 0.640           |
| ENSMUST00000098987                          | ENSMUST00000098987         | ens progesterone receptor Gene [Source:MGI (curated);Acc:MGI:97567] [ENSMUST00000098987]                                    | -0.36                 | 0.025   | 0.961           |
| Gnao1                                       | NM_001113384               | ref Mus musculus guanine nucleotide binding protein, alpha O (Gnao1), transcript variant B, mRNA [NM_001113384]             | -0.36                 | 0.028   | 0.984           |
| chr17:8719950-8783850_R                     | chr17:8719950-8783850_R    | lincRNA:chr17:8719950-8783850 reverse strand                                                                                | -0.36                 | 0.028   | 0.984           |
| ENSMUST00000103311                          | ENSMUST00000103311         | gb Mus musculus partial mRNA for immunoglobulin light chain variable region (IGLV1 gene),antibody 8H4. [AJ278076]           | -0.36                 | 0.043   | 1.000           |
| chr14:22267795-22319045_R                   | chr14:22267795-22319045_R  | lincRNA:chr14:22267795-22319045 reverse strand                                                                              | -0.36                 | 0.017   | 0.854           |
| chr1:138442536-138521080_F                  | chr1:138442536-138521080_F | lincRNA:chr1:138442536-138521080 forward strand                                                                             | -0.36                 | 0.038   | 1.000           |
| Olf119                                      | NM_001011830               | ref Mus musculus olfactory receptor 119 (Olf119), mRNA [NM_001011830]                                                       | -0.36                 | 0.027   | 0.976           |
| Slco6b1                                     | NM_001039475               | ref Mus musculus solute carrier organic anion transporter family, member 6b1 (Slco6b1), mRNA [NM_001039475]                 | -0.36                 | 0.026   | 0.973           |
| chr3:51990494-51991875_F                    | chr3:51990494-51991875_F   | lincRNA:chr3:51990494-51991875 forward strand                                                                               | -0.37                 | 0.047   | 1.000           |
| Itpr2                                       | AB012393                   | gb Mus musculus TIPR mRNA for inositol 1,4,5 trisphosphate receptor type2, complete cds. [AB012393]                         | -0.37                 | 0.018   | 0.869           |
| Tuba3b                                      | NM_009449                  | ref Mus musculus tubulin, alpha 3B (Tuba3b), mRNA [NM_009449]                                                               | -0.37                 | 0.012   | 0.786           |
| Pax2                                        | NM_011037                  | ref Mus musculus paired box gene 2 (Pax2), mRNA [NM_011037]                                                                 | -0.37                 | 0.010   | 0.758           |
| Slc39a4                                     | NM_028064                  | ref Mus musculus solute carrier family 39 (zinc transporter), member 4 (Slc39a4), mRNA [NM_028064]                          | -0.37                 | 0.040   | 1.000           |
| Ablim3                                      | NM_198649                  | ref Mus musculus actin binding LIM protein family, member 3 (Ablim3), transcript variant 1, mRNA [NM_198649]                | -0.37                 | 0.002   | 0.358           |
| Vdr                                         | NM_009504                  | ref Mus musculus vitamin D receptor (Vdr), mRNA [NM_009504]                                                                 | -0.37                 | 0.046   | 1.000           |
| 3110099E03Rik                               | NR_030712                  | ref Mus musculus RIKEN cDNA 3110099E03 gene (3110099E03Rik), non-coding RNA [NR_030712]                                     | -0.37                 | 0.043   | 1.000           |
| Gm7628                                      | ENSMUST00000084990         | ens predicted gene 7628 Gene [Source:MGI Symbol;Acc:MGI:3643956] [ENSMUST00000084990]                                       | -0.37                 | 0.043   | 1.000           |



Online Supplemental Table IV: mG4H-Veh Only

| Gene Symbol                 | RefSeq                      | Description                                                                                                                                                                                         | logFC<br>mG4H-<br>Veh | P-value | Adj.<br>P-value |
|-----------------------------|-----------------------------|-----------------------------------------------------------------------------------------------------------------------------------------------------------------------------------------------------|-----------------------|---------|-----------------|
| Fam179a                     | NM_177087                   | ref Mus musculus family with sequence similarity 179, member A (Fam179a), mRNA [NM_177087]                                                                                                          | -0.37                 | 0.049   | 1.000           |
| Olfr794                     | NM_146378                   | ref Mus musculus olfactory receptor 794 (Olfr794), mRNA [NM_146378]                                                                                                                                 | -0.37                 | 0.003   | 0.447           |
| Hoxa5                       | NM_010453                   | ref Mus musculus homeobox A5 (Hoxa5), mRNA [NM_010453]                                                                                                                                              | -0.37                 | 0.036   | 1.000           |
| chr19:44651000-44651447_R   | chr19:44651000-44651447_R   | lincRNA:chr19:44651000-44651447 reverse strand                                                                                                                                                      | -0.37                 | 0.030   | 0.998           |
| chr6:11996975-12037300_R    | chr6:11996975-12037300_R    | lincRNA:chr6:11996975-12037300 reverse strand                                                                                                                                                       | -0.38                 | 0.025   | 0.965           |
| chr11:112898724-113062945_F | chr11:112898724-113062945_F | lincRNA:chr11:112898724-113062945 forward strand                                                                                                                                                    | -0.38                 | 0.027   | 0.981           |
| Gm3064                      | XM_001475563                | ref PREDICTED: Mus musculus similar to UDP-GlcNAc:betaGal beta-1,3-N-acetylglucosaminyltransferase 4 (LOC100040960), mRNA [XM_001475563]                                                            | -0.38                 | 0.010   | 0.743           |
| 6530439I21                  | AK078387                    | gb Mus musculus 10 days neonate cerebellum cDNA, RIKEN full-length enriched library, clone:6530439I21 product:unclassifiable, full insert sequence. [AK078387]                                      | -0.38                 | 0.027   | 0.983           |
| A530016L24Rik               | NM_177039                   | ref Mus musculus RIKEN cDNA A530016L24 gene (A530016L24Rik), mRNA [NM_177039]                                                                                                                       | -0.38                 | 0.020   | 0.889           |
| Gm4273                      | XM_001479617                | ref PREDICTED: Mus musculus hypothetical protein LOC100048202 (LOC100048202), mRNA [XM_001479617]                                                                                                   | -0.38                 | 0.015   | 0.832           |
| Gm8404                      | XM_987474                   | ref PREDICTED: Mus musculus predicted gene, EG666984 (EG666984), mRNA [XM_987474]                                                                                                                   | -0.38                 | 0.045   | 1.000           |
| chr7:140011140-140018815_R  | chr7:140011140-140018815_R  | lincRNA:chr7:140011140-140018815 reverse strand                                                                                                                                                     | -0.38                 | 0.015   | 0.830           |
| Pak7                        | NM_172858                   | ref Mus musculus p21 protein (Cdc42/Rac)-activated kinase 7 (Pak7), mRNA [NM_172858]                                                                                                                | -0.38                 | 0.029   | 0.989           |
| Olfr1290                    | NM_146262                   | ref Mus musculus olfactory receptor 1290 (Olfr1290), mRNA [NM_146262]                                                                                                                               | -0.38                 | 0.039   | 1.000           |
| Defa-rs1                    | NM_007844                   | ref Mus musculus defensin, alpha, related sequence 1 (Defa-rs1), mRNA [NM_007844]                                                                                                                   | -0.38                 | 0.047   | 1.000           |
| chr7:91558475-91733625_R    | chr7:91558475-91733625_R    | lincRNA:chr7:91558475-91733625 reverse strand                                                                                                                                                       | -0.38                 | 0.007   | 0.674           |
| chr18:5808025-5818625_F     | chr18:5808025-5818625_F     | lincRNA:chr18:5808025-5818625 forward strand                                                                                                                                                        | -0.38                 | 0.044   | 1.000           |
| LOC100048571                | ENSMUST00000089097          | ens RIKEN cDNA 1110057P08 gene Gene [Source:MGI Symbol;Acc:MGI:1916094] [ENSMUST00000089097]                                                                                                        | -0.38                 | 0.030   | 0.998           |
| Rad9b                       | NM_144912                   | ref Mus musculus RAD9 homolog B (S. cerevisiae) (Rad9b), mRNA [NM_144912]                                                                                                                           | -0.38                 | 0.021   | 0.899           |
| chr6:54591416-54597566_R    | chr6:54591416-54597566_R    | lincRNA:chr6:54591416-54597566 reverse strand                                                                                                                                                       | -0.38                 | 0.028   | 0.983           |
| chr3:131128972-131163308_R  | chr3:131128972-131163308_R  | lincRNA:chr3:131128972-131163308 reverse strand                                                                                                                                                     | -0.39                 | 0.046   | 1.000           |
| Crxos1                      | NM_001033638                | ref Mus musculus Crx opposite strand transcript 1 (Crxos1), mRNA [NM_001033638]                                                                                                                     | -0.39                 | 0.007   | 0.681           |
| 9430014N10Rik               | AK020418                    | gb Mus musculus 12 days embryo embryonic body between diaphragm region and neck cDNA, RIKEN full-length enriched library, clone:9430014N10 product:unclassifiable, full insert sequence. [AK020418] | -0.39                 | 0.047   | 1.000           |
| chr8:18587198-18592948_F    | chr8:18587198-18592948_F    | lincRNA:chr8:18587198-18592948 forward strand                                                                                                                                                       | -0.39                 | 0.024   | 0.957           |
| E130309D14Rik               | NM_001013784                | ref Mus musculus RIKEN cDNA E130309D14 gene (E130309D14Rik), mRNA [NM_001013784]                                                                                                                    | -0.39                 | 0.008   | 0.707           |
| chr11:53574182-53574644_R   | chr11:53574182-53574644_R   | lincRNA:chr11:53574182-53574644 reverse strand                                                                                                                                                      | -0.39                 | 0.023   | 0.943           |
| Bend4                       | NM_001164806                | ref Mus musculus BEN domain containing 4 (Bend4), mRNA [NM_001164806]                                                                                                                               | -0.39                 | 0.021   | 0.914           |

Online Supplemental Table IV: mG4H-Veh Only

| Gene Symbol                 | RefSeq                      | Description                                                                                                                                           | logFC<br>mG4H-<br>Veh | P-value | Adj.<br>P-value |
|-----------------------------|-----------------------------|-------------------------------------------------------------------------------------------------------------------------------------------------------|-----------------------|---------|-----------------|
| chr13:94193230-94193710_F   | chr13:94193230-94193710_F   | lincRNA:chr13:94193230-94193710 forward strand                                                                                                        | -0.39                 | 0.022   | 0.934           |
| Gm5118                      | XM_898721                   | ref PREDICTED: Mus musculus predicted gene, EG330819 (EG330819), mRNA [XM_898721]                                                                     | -0.39                 | 0.014   | 0.813           |
| Gm14211                     | XM_001481005                | ref PREDICTED: Mus musculus hypothetical protein LOC100048717 (LOC100048717), mRNA [XM_001481005]                                                     | -0.39                 | 0.022   | 0.935           |
| Sparcl1                     | NM_010097                   | ref Mus musculus SPARC-like 1 (Sparcl1), mRNA [NM_010097]                                                                                             | -0.39                 | 0.004   | 0.550           |
| chr14:77511189-77522852_R   | chr14:77511189-77522852_R   | lincRNA:chr14:77511189-77522852 reverse strand                                                                                                        | -0.39                 | 0.009   | 0.720           |
| chr17:21177225-21187525_R   | chr17:21177225-21187525_R   | lincRNA:chr17:21177225-21187525 reverse strand                                                                                                        | -0.39                 | 0.026   | 0.970           |
| chr12:50490638-50508093_F   | chr12:50490638-50508093_F   | lincRNA:chr12:50490638-50508093 forward strand                                                                                                        | -0.39                 | 0.006   | 0.634           |
| Rasd2                       | NM_029182                   | ref Mus musculus RASD family, member 2 (Rasd2), mRNA [NM_029182]                                                                                      | -0.39                 | 0.002   | 0.380           |
| ENSMUST00000112482          | ENSMUST00000112482          | ens polymerase (DNA directed), epsilon Gene [Source:MGI (curated);Acc:MGI:1196391] [ENSMUST00000112482]                                               | -0.39                 | 0.033   | 1.000           |
| Ssty1                       | NM_009220                   | ref Mus musculus spermiogenesis specific transcript on the Y 1 (Ssty1), mRNA [NM_009220]                                                              | -0.39                 | 0.039   | 1.000           |
| chr15:85412264-85549139_R   | chr15:85412264-85549139_R   | lincRNA:chr15:85412264-85549139 reverse strand                                                                                                        | -0.39                 | 0.036   | 1.000           |
| Nrp                         | NM_001013372                | ref Mus musculus neural regeneration protein (Nrp), mRNA [NM_001013372]                                                                               | -0.39                 | 0.007   | 0.661           |
| chr11:120094176-120097622_R | chr11:120094176-120097622_R | lincRNA:chr11:120094176-120097622 reverse strand                                                                                                      | -0.40                 | 0.023   | 0.942           |
| Asl                         | NM_133768                   | ref Mus musculus argininosuccinate lyase (Asl), mRNA [NM_133768]                                                                                      | -0.40                 | 0.026   | 0.973           |
| Ln timer                    | NM_001159577                | ref Mus musculus ligand of numb-protein X 1 (Ln timer), transcript variant 1, mRNA [NM_001159577]                                                     | -0.40                 | 0.014   | 0.825           |
| 2410124H12Rik               | ENSMUST00000054592          | ens RIKEN cDNA 2410124H12 gene Gene [Source:MGI Symbol;Acc:MGI:1924035] [ENSMUST00000054592]                                                          | -0.40                 | 0.028   | 0.984           |
| chr17:21866967-21891392_R   | chr17:21866967-21891392_R   | lincRNA:chr17:21866967-21891392 reverse strand                                                                                                        | -0.40                 | 0.028   | 0.983           |
| Ahrr                        | NM_009644                   | ref Mus musculus aryl-hydrocarbon receptor repressor (Ahrr), mRNA [NM_009644]                                                                         | -0.40                 | 0.006   | 0.624           |
| 4930528J11Rik               | AK029922                    | gb Mus musculus adult male testis cDNA, RIKEN full-length enriched library, clone:4931441A13 product:unclassifiable, full insert sequence. [AK029922] | -0.40                 | 0.016   | 0.848           |
| ENSMUST00000110900          | ENSMUST00000110900          | ens Putative uncharacterized protein [Source:UniProtKB/TrEMBL;Acc:Q3U0N9] [ENSMUST00000110900]                                                        | -0.40                 | 0.048   | 1.000           |
| 1600002K03Rik               | NM_027207                   | ref Mus musculus RIKEN cDNA 1600002K03 gene (1600002K03Rik), mRNA [NM_027207]                                                                         | -0.40                 | 0.000   | 0.071           |
| ENSMUST00000101129          | ENSMUST00000101129          | ens Putative uncharacterized protein [Source:UniProtKB/TrEMBL;Acc:Q3UHD0] [ENSMUST00000101129]                                                        | -0.40                 | 0.040   | 1.000           |
| YdjC                        | NM_026940                   | ref Mus musculus YdjC homolog (bacterial) (YdjC), mRNA [NM_026940]                                                                                    | -0.40                 | 0.000   | 0.097           |
| Olfir1154                   | NM_146647                   | ref Mus musculus olfactory receptor 1154 (Olfir1154), mRNA [NM_146647]                                                                                | -0.40                 | 0.004   | 0.550           |
| LOC100044306                | XM_001471504                | ref PREDICTED: Mus musculus hypothetical protein LOC100044306 (LOC100044306), mRNA [XM_001471504]                                                     | -0.40                 | 0.031   | 1.000           |
| chr7:3338500-3360725_F      | chr7:3338500-3360725_F      | lincRNA:chr7:3338500-3360725 forward strand                                                                                                           | -0.40                 | 0.008   | 0.694           |

Online Supplemental Table IV: mG4H-Veh Only

| Gene Symbol                | RefSeq                     | Description                                                                                                                    | logFC<br>mG4H-<br>Veh | P-value | Adj.<br>P-value |
|----------------------------|----------------------------|--------------------------------------------------------------------------------------------------------------------------------|-----------------------|---------|-----------------|
| chr17:83497541-83520081_R  | chr17:83497541-83520081_R  | lincRNA:chr17:83497541-83520081 reverse strand                                                                                 | -0.40                 | 0.025   | 0.965           |
| chr7:99879368-99889978_R   | chr7:99879368-99889978_R   | lincRNA:chr7:99879368-99889978 reverse strand                                                                                  | -0.41                 | 0.029   | 0.986           |
| Zfy2                       | NM_009571                  | ref Mus musculus zinc finger protein 2, Y linked (Zfy2), mRNA [NM_009571]                                                      | -0.41                 | 0.046   | 1.000           |
| 2210010C17Rik              | NM_027308                  | ref Mus musculus RIKEN cDNA 2210010C17 gene (2210010C17Rik), mRNA [NM_027308]                                                  | -0.41                 | 0.007   | 0.661           |
| chr10:42691088-42710968_R  | chr10:42691088-42710968_R  | lincRNA:chr10:42691088-42710968 reverse strand                                                                                 | -0.41                 | 0.026   | 0.973           |
| Fanca                      | NM_016925                  | ref Mus musculus Fanconi anemia, complementation group A (Fanca), mRNA [NM_016925]                                             | -0.41                 | 0.005   | 0.621           |
| Pik3cd                     | NM_001164051               | ref Mus musculus phosphatidylinositol 3-kinase catalytic delta polypeptide (Pik3cd), transcript variant 6, mRNA [NM_001164051] | -0.41                 | 0.010   | 0.758           |
| chr12:73789535-73799787_R  | chr12:73789535-73799787_R  | lincRNA:chr12:73789535-73799787 reverse strand                                                                                 | -0.41                 | 0.026   | 0.973           |
| chr17:26669587-26669907_F  | chr17:26669587-26669907_F  | lincRNA:chr17:26669587-26669907 forward strand                                                                                 | -0.41                 | 0.023   | 0.945           |
| 4932438A13Rik              | NM_172679                  | ref Mus musculus RIKEN cDNA 4932438A13 gene (4932438A13Rik), mRNA [NM_172679]                                                  | -0.41                 | 0.009   | 0.720           |
| Hoxb4                      | NM_010459                  | ref Mus musculus homeobox B4 (Hoxb4), mRNA [NM_010459]                                                                         | -0.41                 | 0.005   | 0.578           |
| chr1:94077221-94091396_R   | chr1:94077221-94091396_R   | lincRNA:chr1:94077221-94091396 reverse strand                                                                                  | -0.41                 | 0.028   | 0.983           |
| Bdnf                       | NM_007540                  | ref Mus musculus brain derived neurotrophic factor (Bdnf), transcript variant 1, mRNA [NM_007540]                              | -0.41                 | 0.004   | 0.516           |
| chr8:126268510-126290810_R | chr8:126268510-126290810_R | lincRNA:chr8:126268510-126290810 reverse strand                                                                                | -0.41                 | 0.014   | 0.812           |
| chr17:33995525-34028025_F  | chr17:33995525-34028025_F  | lincRNA:chr17:33995525-34028025 forward strand                                                                                 | -0.41                 | 0.028   | 0.983           |
| chr4:97144314-97144755_R   | chr4:97144314-97144755_R   | lincRNA:chr4:97144314-97144755 reverse strand                                                                                  | -0.41                 | 0.023   | 0.936           |
| AU015836                   | NR_028320                  | ref Mus musculus expressed sequence AU015836 (AU015836), non-coding RNA [NR_028320]                                            | -0.41                 | 0.048   | 1.000           |
| ENSMUST00000099476         | ENSMUST00000099476         | ens Putative uncharacterized proteinMCG1044050 Fragment ; [Source:UniProtKB/TrEMBL;Acc:Q8CDW6] [ENSMUST00000099476]            | -0.41                 | 0.048   | 1.000           |
| chr8:15582950-15609500_F   | chr8:15582950-15609500_F   | lincRNA:chr8:15582950-15609500 forward strand                                                                                  | -0.42                 | 0.022   | 0.919           |
| Gpr115                     | NM_030067                  | ref Mus musculus G protein-coupled receptor 115 (Gpr115), mRNA [NM_030067]                                                     | -0.42                 | 0.040   | 1.000           |
| chr8:86706637-86707004_R   | chr8:86706637-86707004_R   | lincRNA:chr8:86706637-86707004 reverse strand                                                                                  | -0.42                 | 0.026   | 0.972           |
| LOC100039617               | XM_001472803               | ref PREDICTED: Mus musculus hypothetical protein LOC100039617, transcript variant 1 (LOC100039617), mRNA [XM_001472803]        | -0.42                 | 0.010   | 0.764           |
| Gm4956                     | NR_002858                  | ref Mus musculus predicted gene 4956 (Gm4956), non-coding RNA [NR_002858]                                                      | -0.42                 | 0.018   | 0.863           |
| Pole                       | NM_011132                  | ref Mus musculus polymerase (DNA directed), epsilon (Pole), mRNA [NM_011132]                                                   | -0.42                 | 0.001   | 0.231           |
| ENSMUST00000058298         | ENSMUST00000058298         | tc BI54_MOUSE (P28664) Brain protein I54, complete [TC1600266]                                                                 | -0.42                 | 0.048   | 1.000           |
| Adam6a                     | NM_174885                  | ref Mus musculus a disintegrin and metallopeptidase domain 6A (Adam6a), mRNA [NM_174885]                                       | -0.42                 | 0.032   | 1.000           |
| 8430423G03Rik              | ENSMUST00000110507         | ref PREDICTED: Mus musculus RIKEN cDNA 8430423G03 gene (8430423G03Rik), mRNA [XM_975364]                                       | -0.42                 | 0.005   | 0.594           |
| LOC100047229               | XM_001477692               | ref PREDICTED: Mus musculus similar to RIKEN cDNA 3110050K21 (LOC100047229), mRNA [XM_001477692]                               | -0.42                 | 0.044   | 1.000           |

Online Supplemental Table IV: mG4H-Veh Only

| Gene Symbol               | RefSeq                    | Description                                                                                                                                                   | logFC<br>mG4H-<br>Veh | P-value | Adj.<br>P-value |
|---------------------------|---------------------------|---------------------------------------------------------------------------------------------------------------------------------------------------------------|-----------------------|---------|-----------------|
| ENSMUST00000130418        | ENSMUST00000130418        | ens aldehyde dehydrogenase 1 family, member L1 Gene [Source:MGI (curated);Acc:MGI:1340024] [ENSMUST00000130418]                                               | -0.42                 | 0.046   | 1.000           |
| ENSMUST00000105030        | ENSMUST00000105030        | ens Putative uncharacterized protein [Source:UniProtKB/TrEMBL;Acc:Q6R5E0] [ENSMUST00000105030]                                                                | -0.42                 | 0.019   | 0.881           |
| Pde11a                    | NM_001081033              | ref Mus musculus phosphodiesterase 11A (Pde11a), mRNA [NM_001081033]                                                                                          | -0.42                 | 0.021   | 0.916           |
| ENSMUST00000100368        | ENSMUST00000100368        | ens Putative uncharacterized protein [Source:UniProtKB/TrEMBL;Acc:Q3T2T9] [ENSMUST00000100368]                                                                | -0.42                 | 0.004   | 0.538           |
| chr11:31647436-31647791_R | chr11:31647436-31647791_R | lincRNA:chr11:31647436-31647791 reverse strand                                                                                                                | -0.42                 | 0.040   | 1.000           |
| A330021E22Rik             | NM_172447                 | ref Mus musculus RIKEN cDNA A330021E22 gene (A330021E22Rik), mRNA [NM_172447]                                                                                 | -0.43                 | 0.036   | 1.000           |
| AU015791                  | AK139027                  | gb Mus musculus adult male aorta and vein cDNA, RIKEN full-length enriched library, clone:A530083O18 product:unclassifiable, full insert sequence. [AK139027] | -0.43                 | 0.017   | 0.855           |
| BB114814                  | XM_915703                 | ref PREDICTED: Mus musculus similar to deleted in malignant brain tumors 1 (LOC546006), mRNA [XM_915703]                                                      | -0.43                 | 0.002   | 0.377           |
| 1700123L14Rik             | NR_003643                 | ref Mus musculus RIKEN cDNA 1700123L14 gene (1700123L14Rik), non-coding RNA [NR_003643]                                                                       | -0.43                 | 0.015   | 0.840           |
| chr15:61984389-62102500_R | chr15:61984389-62102500_R | lincRNA:chr15:61984389-62102500 reverse strand                                                                                                                | -0.43                 | 0.036   | 1.000           |
| XM_001474366              | XM_001474366              | ref PREDICTED: Mus musculus hypothetical protein LOC100040243 (LOC100040243), mRNA [XM_001474366]                                                             | -0.43                 | 0.008   | 0.693           |
| chr13:53100475-53113850_F | chr13:53100475-53113850_F | lincRNA:chr13:53100475-53113850 forward strand                                                                                                                | -0.43                 | 0.003   | 0.439           |
| Creb3l4                   | NM_030080                 | ref Mus musculus cAMP responsive element binding protein 3-like 4 (Creb3l4), mRNA [NM_030080]                                                                 | -0.43                 | 0.026   | 0.973           |
| Mospd4                    | NM_028086                 | ref Mus musculus motile sperm domain containing 4 (Mospd4), mRNA [NM_028086]                                                                                  | -0.43                 | 0.007   | 0.683           |
| chr17:15357376-15385701_R | chr17:15357376-15385701_R | lincRNA:chr17:15357376-15385701 reverse strand                                                                                                                | -0.43                 | 0.006   | 0.654           |
| chr16:4871449-4874336_R   | chr16:4871449-4874336_R   | lincRNA:chr16:4871449-4874336 reverse strand                                                                                                                  | -0.43                 | 0.024   | 0.957           |
| 1700010B08Rik             | ENSMUST00000073081        | ens RIKEN cDNA 1700010B08 gene Gene [Source:MGI Symbol;Acc:MGI:1922735] [ENSMUST00000073081]                                                                  | -0.43                 | 0.043   | 1.000           |
| E130119H09Rik             | XR_002314                 | ref PREDICTED: Mus musculus RIKEN cDNA E130119H09 gene (E130119H09Rik), misc RNA [XR_002314]                                                                  | -0.43                 | 0.009   | 0.737           |
| chr17:80133213-80144417_F | chr17:80133213-80144417_F | lincRNA:chr17:80133213-80144417 forward strand                                                                                                                | -0.43                 | 0.037   | 1.000           |
| Gm4696                    | NM_001099918              | ref Mus musculus predicted gene 4696 (Gm4696), mRNA [NM_001099918]                                                                                            | -0.43                 | 0.012   | 0.789           |
| ENSMUST00000096426        | ENSMUST00000096426        | ens RIKEN cDNA C230004F18 gene Gene [Source:MGI Symbol;Acc:MGI:3041217] [ENSMUST00000096426]                                                                  | -0.44                 | 0.038   | 1.000           |
| Myot                      | NM_001033621              | ref Mus musculus myotilin (Myot), mRNA [NM_001033621]                                                                                                         | -0.44                 | 0.001   | 0.275           |
| BC049715                  | NM_178776                 | ref Mus musculus cDNA sequence BC049715 (BC049715), mRNA [NM_178776]                                                                                          | -0.44                 | 0.020   | 0.895           |
| ENSMUST00000117486        | ENSMUST00000117486        | ens ficolin B Gene [Source:MGI (curated);Acc:MGI:1341158] [ENSMUST00000117486]                                                                                | -0.44                 | 0.021   | 0.897           |
| chr19:53517903-53540753_R | chr19:53517903-53540753_R | lincRNA:chr19:53517903-53540753 reverse strand                                                                                                                | -0.44                 | 0.017   | 0.863           |
| Rab39                     | NM_175562                 | ref Mus musculus RAB39, member RAS oncogene family (Rab39), mRNA [NM_175562]                                                                                  | -0.44                 | 0.008   | 0.688           |
| chr4:82979473-83035023_F  | chr4:82979473-83035023_F  | lincRNA:chr4:82979473-83035023 forward strand                                                                                                                 | -0.44                 | 0.018   | 0.865           |

Online Supplemental Table IV: mG4H-Veh Only

| Gene Symbol                | RefSeq                     | Description                                                                                                                                | logFC<br>mG4H-<br>Veh | P-value | Adj.<br>P-value |
|----------------------------|----------------------------|--------------------------------------------------------------------------------------------------------------------------------------------|-----------------------|---------|-----------------|
| Tmeff1                     | NM_021436                  | ref Mus musculus transmembrane protein with EGF-like and two follistatin-like domains 1 (Tmeff1), mRNA [NM_021436]                         | -0.44                 | 0.004   | 0.538           |
| Trim65                     | NM_178802                  | ref Mus musculus tripartite motif-containing 65 (Trim65), mRNA [NM_178802]                                                                 | -0.44                 | 0.001   | 0.214           |
| chr15:36800254-36809571_R  | chr15:36800254-36809571_R  | lincRNA:chr15:36800254-36809571 reverse strand                                                                                             | -0.44                 | 0.046   | 1.000           |
| LOC100047336               | XM_001477926               | ref PREDICTED: Mus musculus similar to monoclonal anti-alpha-1,3-galactosyltransferase IgM heavy chain (LOC100047336), mRNA [XM_001477926] | -0.44                 | 0.013   | 0.799           |
| chr17:10517466-10522172_F  | chr17:10517466-10522172_F  | lincRNA:chr17:10517466-10522172 forward strand                                                                                             | -0.44                 | 0.028   | 0.983           |
| Epb4.1l5                   | NM_145506                  | ref Mus musculus erythrocyte protein band 4.1-like 5 (Epb4.1l5), transcript variant 1, mRNA [NM_145506]                                    | -0.44                 | 0.002   | 0.403           |
| Ltb4r2                     | NM_020490                  | ref Mus musculus leukotriene B4 receptor 2 (Ltb4r2), mRNA [NM_020490]                                                                      | -0.44                 | 0.043   | 1.000           |
| 1700018P22Rik              | XM_001472999               | ref PREDICTED: Mus musculus RIKEN cDNA 1700018P22 gene (1700018P22Rik), mRNA [XM_001472999]                                                | -0.44                 | 0.033   | 1.000           |
| chr3:131128972-131163308_R | chr3:131128972-131163308_R | lincRNA:chr3:131128972-131163308 reverse strand                                                                                            | -0.45                 | 0.037   | 1.000           |
| chr5:44173484-44176009_F   | chr5:44173484-44176009_F   | lincRNA:chr5:44173484-44176009 forward strand                                                                                              | -0.45                 | 0.050   | 1.000           |
| chr7:96640618-96649018_F   | chr7:96640618-96649018_F   | lincRNA:chr7:96640618-96649018 forward strand                                                                                              | -0.45                 | 0.016   | 0.848           |
| LOC100044692               | XM_001472863               | ref PREDICTED: Mus musculus similar to aldehyde reductase (LOC100044692), mRNA [XM_001472863]                                              | -0.45                 | 0.023   | 0.941           |
| Hist1h1d                   | NM_145713                  | ref Mus musculus histone cluster 1, H1d (Hist1h1d), mRNA [NM_145713]                                                                       | -0.45                 | 0.012   | 0.786           |
| Tpd52l1                    | NM_009413                  | ref Mus musculus tumor protein D52-like 1 (Tpd52l1), mRNA [NM_009413]                                                                      | -0.45                 | 0.003   | 0.464           |
| Dmrtc1a                    | NM_027591                  | ref Mus musculus DMRT-like family C1a (Dmrtc1a), transcript variant 1, mRNA [NM_027591]                                                    | -0.45                 | 0.034   | 1.000           |
| Sept6                      | NM_019942                  | ref Mus musculus septin 6 (Sept6), transcript variant 2, mRNA [NM_019942]                                                                  | -0.45                 | 0.002   | 0.377           |
| Gm6477                     | XR_032300                  | ref PREDICTED: Mus musculus predicted gene, EG624165 (EG624165), misc RNA [XR_032300]                                                      | -0.45                 | 0.030   | 0.994           |
| XM_001477157               | XM_001477157               | ref PREDICTED: Mus musculus hypothetical protein LOC100046406 (LOC100046406), mRNA [XM_001477157]                                          | -0.46                 | 0.037   | 1.000           |
| chr15:85421725-85424047_F  | chr15:85421725-85424047_F  | lincRNA:chr15:85421725-85424047 forward strand                                                                                             | -0.46                 | 0.001   | 0.331           |
| ENSMUST00000113311         | ENSMUST00000113311         | ens Putative uncharacterized protein [Source:UniProtKB/TrEMBL;Acc:Q3UMM9] [ENSMUST00000113311]                                             | -0.46                 | 0.028   | 0.983           |
| chrX:148732853-148761972_R | chrX:148732853-148761972_R | lincRNA:chrX:148732853-148761972 reverse strand                                                                                            | -0.46                 | 0.036   | 1.000           |
| chr6:82608223-82669023_R   | chr6:82608223-82669023_R   | lincRNA:chr6:82608223-82669023 reverse strand                                                                                              | -0.46                 | 0.042   | 1.000           |
| L3mbtl                     | NM_001081338               | ref Mus musculus l(3)mbt-like (Drosophila) (L3mbtl), mRNA [NM_001081338]                                                                   | -0.46                 | 0.015   | 0.828           |
| Tmem178                    | NM_026516                  | ref Mus musculus transmembrane protein 178 (Tmem178), mRNA [NM_026516]                                                                     | -0.46                 | 0.004   | 0.518           |
| D830030K20Rik              | NM_177135                  | ref Mus musculus RIKEN cDNA D830030K20 gene (D830030K20Rik), mRNA [NM_177135]                                                              | -0.46                 | 0.019   | 0.881           |
| Kcnc1                      | NM_008421                  | ref Mus musculus potassium voltage gated channel, Shaw-related subfamily, member 1 (Kcnc1), transcript variant B, mRNA [NM_008421]         | -0.46                 | 0.009   | 0.720           |
| Kcnp2                      | NM_145703                  | ref Mus musculus Kv channel-interacting protein 2 (Kcnp2), transcript variant a, mRNA [NM_145703]                                          | -0.46                 | 0.001   | 0.263           |

Online Supplemental Table IV: mG4H-Veh Only

| Gene Symbol                | RefSeq                     | Description                                                                                                                                             | logFC<br>mG4H-<br>Veh | P-value | Adj.<br>P-value |
|----------------------------|----------------------------|---------------------------------------------------------------------------------------------------------------------------------------------------------|-----------------------|---------|-----------------|
| 4930547H16Rik              | XM_001477863               | ref PREDICTED: Mus musculus RIKEN cDNA 4930547H16 gene (4930547H16Rik), mRNA [XM_001477863]                                                             | -0.46                 | 0.047   | 1.000           |
| 4930468A15Rik              | ENSMUST00000114054         | ens RIKEN cDNA 4930468A15 gene Gene [Source:MGI Symbol;Acc:MGI:1922237] [ENSMUST00000114054]                                                            | -0.46                 | 0.012   | 0.783           |
| Gm7568                     | XM_977441                  | ref PREDICTED: Mus musculus predicted gene, EG665282 (EG665282), mRNA [XM_977441]                                                                       | -0.46                 | 0.024   | 0.957           |
| 1700008K24Rik              | XM_001479501               | ref PREDICTED: Mus musculus RIKEN cDNA 1700008K24 gene (1700008K24Rik), mRNA [XM_001479501]                                                             | -0.47                 | 0.009   | 0.712           |
| ENSMUST00000107184         | ENSMUST00000107184         | ens SH3-domain GRB2-like 2 Gene [Source:MGI (curated);Acc:MGI:700009] [ENSMUST00000107184]                                                              | -0.47                 | 0.041   | 1.000           |
| chr5:149751979-149808240_F | chr5:149751979-149808240_F | lincRNA:chr5:149751979-149808240 forward strand                                                                                                         | -0.47                 | 0.034   | 1.000           |
| Vmn1r22                    | NM_134178                  | ref Mus musculus vomeronasal 1 receptor 22 (Vmn1r22), mRNA [NM_134178]                                                                                  | -0.47                 | 0.032   | 1.000           |
| Mapkapk5                   | XM_001479242               | ref PREDICTED: Mus musculus similar to MK-5 type 2 (LOC100047833), mRNA [XM_001479242]                                                                  | -0.47                 | 0.024   | 0.957           |
| Gm13955                    | ENSMUST00000103640         | ens TRAV6-3TRAV6D-3 Fragment ; [Source:UniProtKB/TrEMBL;Acc:Q5R1E6] [ENSMUST00000103638]                                                                | -0.47                 | 0.043   | 1.000           |
| Klhl38                     | NM_177755                  | ref Mus musculus kelch-like 38 (Drosophila) (Klhl38), mRNA [NM_177755]                                                                                  | -0.47                 | 0.019   | 0.881           |
| LOC100048338               | XR_034632                  | ref PREDICTED: Mus musculus similar to Pdlim1 protein (LOC100048338), misc RNA [XR_034632]                                                              | -0.47                 | 0.006   | 0.624           |
| Dock4                      | NM_172803                  | ref Mus musculus dedicator of cytokinesis 4 (Dock4), mRNA [NM_172803]                                                                                   | -0.47                 | 0.040   | 1.000           |
| Olf1496                    | NM_146989                  | ref Mus musculus olfactory receptor 1496 (Olf1496), mRNA [NM_146989]                                                                                    | -0.47                 | 0.013   | 0.802           |
| chr3:127457767-127483408_R | chr3:127457767-127483408_R | lincRNA:chr3:127457767-127483408 reverse strand                                                                                                         | -0.47                 | 0.013   | 0.802           |
| chr18:36470130-36489110_F  | chr18:36470130-36489110_F  | lincRNA:chr18:36470130-36489110 forward strand                                                                                                          | -0.47                 | 0.039   | 1.000           |
| Cldn5                      | NM_013805                  | ref Mus musculus claudin 5 (Cldn5), mRNA [NM_013805]                                                                                                    | -0.47                 | 0.003   | 0.488           |
| C130078N14                 | AK081811                   | gb Mus musculus 16 days embryo head cDNA, RIKEN full-length enriched library, clone:C130078N14 product:unclassifiable, full insert sequence. [AK081811] | -0.47                 | 0.028   | 0.986           |
| Olf1406                    | NM_146763                  | ref Mus musculus olfactory receptor 1406 (Olf1406), mRNA [NM_146763]                                                                                    | -0.47                 | 0.014   | 0.813           |
| chr4:88583425-88584070_R   | chr4:88583425-88584070_R   | lincRNA:chr4:88583425-88584070 reverse strand                                                                                                           | -0.48                 | 0.009   | 0.730           |
| chr15:73227424-73257474_F  | chr15:73227424-73257474_F  | lincRNA:chr15:73227424-73257474 forward strand                                                                                                          | -0.48                 | 0.035   | 1.000           |
| Olf1161                    | NM_146848                  | ref Mus musculus olfactory receptor 1161 (Olf1161), mRNA [NM_146848]                                                                                    | -0.48                 | 0.032   | 1.000           |
| Olf1031                    | NM_001011759               | ref Mus musculus olfactory receptor 1031 (Olf1031), mRNA [NM_001011759]                                                                                 | -0.48                 | 0.036   | 1.000           |
| ENSMUST00000076984         | ENSMUST00000076984         | ens RIKEN cDNA 1700028116 gene Gene [Source:MGI Symbol;Acc:MGI:1917253] [ENSMUST00000076984]                                                            | -0.48                 | 0.026   | 0.973           |
| H47                        | NM_024439                  | ref Mus musculus histocompatibility 47 (H47), mRNA [NM_024439]                                                                                          | -0.48                 | 0.000   | 0.031           |
| Olf490                     | NM_146498                  | ref Mus musculus olfactory receptor 490 (Olf490), mRNA [NM_146498]                                                                                      | -0.48                 | 0.026   | 0.974           |
| chr7:69088784-69089906_R   | chr7:69088784-69089906_R   | lincRNA:chr7:69088784-69089906 reverse strand                                                                                                           | -0.48                 | 0.046   | 1.000           |
| chr8:123571640-123607481_R | chr8:123571640-123607481_R | lincRNA:chr8:123571640-123607481 reverse strand                                                                                                         | -0.48                 | 0.041   | 1.000           |
| Map2k6                     | NM_011943                  | ref Mus musculus mitogen-activated protein kinase kinase 6 (Map2k6), mRNA [NM_011943]                                                                   | -0.48                 | 0.001   | 0.262           |



Online Supplemental Table IV: mG4H-Veh Only

| Gene Symbol                 | RefSeq                      | Description                                                                                                                        | logFC<br>mG4H-<br>Veh | P-value | Adj.<br>P-value |
|-----------------------------|-----------------------------|------------------------------------------------------------------------------------------------------------------------------------|-----------------------|---------|-----------------|
| chr11:117835849-117842574_F | chr11:117835849-117842574_F | lincRNA:chr11:117835849-117842574 forward strand                                                                                   | -0.49                 | 0.027   | 0.981           |
| AY026312                    | NM_133359                   | ref Mus musculus cDNA sequence AY026312 (AY026312), mRNA [NM_133359]                                                               | -0.49                 | 0.039   | 1.000           |
| ENSMUST00000103326          | ENSMUST00000103326          | gb Mus musculus anti-DNA antibody Ig kappa chain mRNA, V-J region, hybridoma 104-67, partial cds. [U29595]                         | -0.49                 | 0.050   | 1.000           |
| chr16:40469578-40469759_F   | chr16:40469578-40469759_F   | lincRNA:chr16:40469578-40469759 forward strand                                                                                     | -0.49                 | 0.024   | 0.952           |
| chr5:149751979-149808240_F  | chr5:149751979-149808240_F  | lincRNA:chr5:149751979-149808240 forward strand                                                                                    | -0.49                 | 0.017   | 0.854           |
| Gm12474                     | ENSMUST00000066727          | ens Putative uncharacterized protein Fragment [Source:UniProtKB/TrEMBL;Acc:Q8BPS1] [ENSMUST00000066727]                            | -0.49                 | 0.006   | 0.636           |
| Gm2745                      | XM_001474423                | ref PREDICTED: Mus musculus similar to transcription elongation factor B polypeptide 3C (LOC100040382), mRNA [XM_001474423]        | -0.49                 | 0.031   | 1.000           |
| Tmem221                     | NM_001100462                | ref Mus musculus transmembrane protein 221 (Tmem221), mRNA [NM_001100462]                                                          | -0.49                 | 0.016   | 0.848           |
| Klf15                       | NM_023184                   | ref Mus musculus Kruppel-like factor 15 (Klf15), mRNA [NM_023184]                                                                  | -0.49                 | 0.004   | 0.550           |
| ENSMUST00000120051          | ENSMUST00000120051          | ens lipoma HMGIC fusion partner-like 2 Gene [Source:MGI (curated);Acc:MGI:2145236] [ENSMUST00000120051]                            | -0.49                 | 0.031   | 0.998           |
| Olf531                      | NM_146953                   | ref Mus musculus olfactory receptor 531 (Olf531), mRNA [NM_146953]                                                                 | -0.49                 | 0.017   | 0.858           |
| chr4:59306575-59317850_F    | chr4:59306575-59317850_F    | lincRNA:chr4:59306575-59317850 forward strand                                                                                      | -0.49                 | 0.025   | 0.957           |
| Gstm7                       | NM_026672                   | ref Mus musculus glutathione S-transferase, mu 7 (Gstm7), mRNA [NM_026672]                                                         | -0.49                 | 0.000   | 0.148           |
| chr14:106068373-106146613_F | chr14:106068373-106146613_F | lincRNA:chr14:106068373-106146613 forward strand                                                                                   | -0.50                 | 0.020   | 0.895           |
| chr12:112224193-112225328_R | chr12:112224193-112225328_R | lincRNA:chr12:112224193-112225328 reverse strand                                                                                   | -0.50                 | 0.005   | 0.621           |
| Bhlhe23                     | ENSMUST00000061098          | ens basic helix-loop-helix family, member e23 Gene [Source:MGI (curated);Acc:MGI:2153710] [ENSMUST00000061098]                     | -0.50                 | 0.010   | 0.743           |
| chr13:53100475-53113850_F   | chr13:53100475-53113850_F   | lincRNA:chr13:53100475-53113850 forward strand                                                                                     | -0.50                 | 0.000   | 0.108           |
| H2-Q8                       | NM_023124                   | ref Mus musculus histocompatibility 2, Q region locus 8 (H2-Q8), mRNA [NM_023124]                                                  | -0.50                 | 0.001   | 0.337           |
| chr17:84477999-84489215_F   | chr17:84477999-84489215_F   | lincRNA:chr17:84477999-84489215 forward strand                                                                                     | -0.50                 | 0.033   | 1.000           |
| chr5:139225387-139230837_F  | chr5:139225387-139230837_F  | lincRNA:chr5:139225387-139230837 forward strand                                                                                    | -0.50                 | 0.030   | 0.998           |
| chr3:143541356-143617738_R  | chr3:143541356-143617738_R  | lincRNA:chr3:143541356-143617738 reverse strand                                                                                    | -0.51                 | 0.027   | 0.982           |
| Tuba3a                      | NM_009446                   | ref Mus musculus tubulin, alpha 3A (Tuba3a), mRNA [NM_009446]                                                                      | -0.51                 | 0.000   | 0.110           |
| Olfml2a                     | NM_172854                   | ref Mus musculus olfactomedin-like 2A (Olfml2a), mRNA [NM_172854]                                                                  | -0.51                 | 0.027   | 0.983           |
| A530016L24Rik               | NM_177039                   | ref Mus musculus RIKEN cDNA A530016L24 gene (A530016L24Rik), mRNA [NM_177039]                                                      | -0.51                 | 0.007   | 0.661           |
| LOC625953                   | XM_001480391                | ref PREDICTED: Mus musculus similar to Chain A, Crystal Structure Of Mgsta1-1 In Complex With Gsh (LOC625953), mRNA [XM_001480391] | -0.51                 | 0.014   | 0.812           |
| Gm6828                      | XR_004809                   | ref PREDICTED: Mus musculus similar to Arp2 (LOC675630), misc RNA [XR_004809]                                                      | -0.51                 | 0.017   | 0.854           |
| chr3:41327493-41328368_F    | chr3:41327493-41328368_F    | lincRNA:chr3:41327493-41328368 forward strand                                                                                      | -0.51                 | 0.028   | 0.983           |

Online Supplemental Table IV: mG4H-Veh Only

| Gene Symbol                | RefSeq                     | Description                                                                                                                                                    | logFC<br>mG4H-<br>Veh | P-value | Adj.<br>P-value |
|----------------------------|----------------------------|----------------------------------------------------------------------------------------------------------------------------------------------------------------|-----------------------|---------|-----------------|
| D630002J18Rik              | AK052598                   | gb Mus musculus 0 day neonate kidney cDNA, RIKEN full-length enriched library, clone:D630002J18 product:hypothetical protein, full insert sequence. [AK052598] | -0.51                 | 0.044   | 1.000           |
| Ivns1abp                   | NM_054102                  | ref Mus musculus influenza virus NS1A binding protein (Ivns1abp), transcript variant 2, mRNA [NM_054102]                                                       | -0.51                 | 0.000   | 0.137           |
| Cyp2b9                     | NM_010000                  | ref Mus musculus cytochrome P450, family 2, subfamily b, polypeptide 9 (Cyp2b9), mRNA [NM_010000]                                                              | -0.51                 | 0.004   | 0.538           |
| Zdhhc25                    | NM_027306                  | ref Mus musculus zinc finger, DHHC domain containing 25 (Zdhhc25), mRNA [NM_027306]                                                                            | -0.52                 | 0.044   | 1.000           |
| Gstm7                      | NM_026672                  | ref Mus musculus glutathione S-transferase, mu 7 (Gstm7), mRNA [NM_026672]                                                                                     | -0.52                 | 0.000   | 0.031           |
| Mro                        | NM_027741                  | ref Mus musculus maestro (Mro), mRNA [NM_027741]                                                                                                               | -0.52                 | 0.040   | 1.000           |
| Dct                        | NM_010024                  | ref Mus musculus dopachrome tautomerase (Dct), mRNA [NM_010024]                                                                                                | -0.53                 | 0.016   | 0.848           |
| ENSMUST00000084713         | ENSMUST00000084713         | ens Putative uncharacterized protein [Source:UniProtKB/TrEMBL;Acc:Q3V0H5] [ENSMUST00000084713]                                                                 | -0.53                 | 0.004   | 0.550           |
| ENSMUST00000072628         | ENSMUST00000072628         | ens t-complex protein 11 Gene [Source:MGI (curated);Acc:MGI:98544] [ENSMUST00000072628]                                                                        | -0.53                 | 0.006   | 0.635           |
| chr13:53100475-53113850_F  | chr13:53100475-53113850_F  | lincRNA:chr13:53100475-53113850 forward strand                                                                                                                 | -0.53                 | 0.001   | 0.218           |
| ENSMUST00000121189         | ENSMUST00000121189         | ens ubiquitin-conjugating enzyme E2C binding protein Gene [Source:MGI (curated);Acc:MGI:1917598] [ENSMUST00000121189]                                          | -0.53                 | 0.028   | 0.983           |
| Gm4471                     | XR_033353                  | ref PREDICTED: Mus musculus hypothetical protein LOC100047227 (LOC100047227), misc RNA [XR_033353]                                                             | -0.53                 | 0.021   | 0.914           |
| chr17:73335854-73336316_F  | chr17:73335854-73336316_F  | lincRNA:chr17:73335854-73336316 forward strand                                                                                                                 | -0.53                 | 0.035   | 1.000           |
| Gm7435                     | XR_030988                  | ref PREDICTED: Mus musculus similar to XY body protein (LOC664980), misc RNA [XR_030988]                                                                       | -0.54                 | 0.029   | 0.989           |
| chr2:67410825-67411407_F   | chr2:67410825-67411407_F   | lincRNA:chr2:67410825-67411407 forward strand                                                                                                                  | -0.54                 | 0.014   | 0.825           |
| ENSMUST00000086269         | ENSMUST00000086269         | ens NLR family, pyrin domain containing 4D Gene [Source:MGI Symbol;Acc:MGI:3056574] [ENSMUST00000086269]                                                       | -0.54                 | 0.010   | 0.762           |
| chr10:39383665-39442690_F  | chr10:39383665-39442690_F  | lincRNA:chr10:39383665-39442690 forward strand                                                                                                                 | -0.54                 | 0.007   | 0.674           |
| Rhd                        | NM_011270                  | ref Mus musculus Rh blood group, D antigen (Rhd), mRNA [NM_011270]                                                                                             | -0.54                 | 0.000   | 0.131           |
| chr5:137392195-137426421_F | chr5:137392195-137426421_F | lincRNA:chr5:137392195-137426421 forward strand                                                                                                                | -0.54                 | 0.021   | 0.914           |
| chr16:7947710-7948066_R    | chr16:7947710-7948066_R    | lincRNA:chr16:7947710-7948066 reverse strand                                                                                                                   | -0.54                 | 0.018   | 0.876           |
| chr5:147538052-147546377_R | chr5:147538052-147546377_R | lincRNA:chr5:147538052-147546377 reverse strand                                                                                                                | -0.54                 | 0.027   | 0.983           |
| 9130404H23Rik              | NM_028998                  | ref Mus musculus RIKEN cDNA 9130404H23 gene (9130404H23Rik), mRNA [NM_028998]                                                                                  | -0.54                 | 0.026   | 0.975           |
| Lpl                        | NM_008509                  | ref Mus musculus lipoprotein lipase (Lpl), mRNA [NM_008509]                                                                                                    | -0.54                 | 0.000   | 0.020           |
| chr2:31001736-31006911_R   | chr2:31001736-31006911_R   | lincRNA:chr2:31001736-31006911 reverse strand                                                                                                                  | -0.54                 | 0.039   | 1.000           |
| Dct                        | NM_010024                  | ref Mus musculus dopachrome tautomerase (Dct), mRNA [NM_010024]                                                                                                | -0.54                 | 0.011   | 0.772           |
| chr1:42758928-42771337_F   | chr1:42758928-42771337_F   | lincRNA:chr1:42758928-42771337 forward strand                                                                                                                  | -0.54                 | 0.041   | 1.000           |
| ENSMUST00000106688         | ENSMUST00000106688         | ens glutathione S-transferase, mu 7 Gene [Source:MGI (curated);Acc:MGI:1915562] [ENSMUST00000106688]                                                           | -0.55                 | 0.006   | 0.661           |

| Online Supplemental Table IV: mG4H-Veh Only |                            |                                                                                                                                                            |                       |         |                 |
|---------------------------------------------|----------------------------|------------------------------------------------------------------------------------------------------------------------------------------------------------|-----------------------|---------|-----------------|
| Gene Symbol                                 | RefSeq                     | Description                                                                                                                                                | logFC<br>mG4H-<br>Veh | P-value | Adj.<br>P-value |
| LOC100048725                                | XM_001481047               | ref PREDICTED: Mus musculus hypothetical protein LOC100048725 (LOC100048725), mRNA [XM_001481047]                                                          | -0.55                 | 0.008   | 0.694           |
| AI835086                                    | AK043585                   | gb Mus musculus 10 days neonate cortex cDNA, RIKEN full-length enriched library, clone:A830010I12 product:unclassifiable, full insert sequence. [AK043585] | -0.55                 | 0.008   | 0.688           |
| chrX:146897133-146900197_R                  | chrX:146897133-146900197_R | lincRNA:chrX:146897133-146900197 reverse strand                                                                                                            | -0.55                 | 0.048   | 1.000           |
| Cacna1s                                     | NM_001081023               | ref Mus musculus calcium channel, voltage-dependent, L type, alpha 1S subunit (Cacna1s), transcript variant 2, mRNA [NM_001081023]                         | -0.55                 | 0.001   | 0.263           |
| Odf3l1                                      | NM_198673                  | ref Mus musculus outer dense fiber of sperm tails 3-like 1 (Odf3l1), mRNA [NM_198673]                                                                      | -0.55                 | 0.020   | 0.897           |
| Cacna1s                                     | NM_001081023               | ref Mus musculus calcium channel, voltage-dependent, L type, alpha 1S subunit (Cacna1s), transcript variant 2, mRNA [NM_001081023]                         | -0.55                 | 0.003   | 0.508           |
| ENSMUST00000114824                          | ENSMUST00000114824         | ens family with sequence similarity 59, member B Gene [Source:MGI (curated);Acc:MGI:2685290] [ENSMUST00000114824]                                          | -0.55                 | 0.008   | 0.709           |
| chr2:153163620-153170845_F                  | chr2:153163620-153170845_F | lincRNA:chr2:153163620-153170845 forward strand                                                                                                            | -0.56                 | 0.030   | 0.998           |
| Grin1                                       | NM_008169                  | ref Mus musculus glutamate receptor, ionotropic, NMDA1 (zeta 1) (Grin1), transcript variant 1, mRNA [NM_008169]                                            | -0.56                 | 0.044   | 1.000           |
| chr5:106982442-107045717_R                  | chr5:106982442-107045717_R | lincRNA:chr5:106982442-107045717 reverse strand                                                                                                            | -0.56                 | 0.026   | 0.973           |
| 4933434C23Rik                               | AK017052                   | gb Mus musculus adult male testis cDNA, RIKEN full-length enriched library, clone:4933434C23 product:unclassifiable, full insert sequence. [AK017052]      | -0.56                 | 0.033   | 1.000           |
| Nrg2                                        | NM_001167891               | ref Mus musculus neuregulin 2 (Nrg2), mRNA [NM_001167891]                                                                                                  | -0.56                 | 0.041   | 1.000           |
| chr7:66574000-66577193_F                    | chr7:66574000-66577193_F   | lincRNA:chr7:66574000-66577193 forward strand                                                                                                              | -0.56                 | 0.049   | 1.000           |
| chr1:88405875-88418150_R                    | chr1:88405875-88418150_R   | lincRNA:chr1:88405875-88418150 reverse strand                                                                                                              | -0.56                 | 0.035   | 1.000           |
| Lad1                                        | NM_133664                  | ref Mus musculus ladinin (Lad1), mRNA [NM_133664]                                                                                                          | -0.56                 | 0.003   | 0.456           |
| Armc2                                       | NM_001034858               | ref Mus musculus armadillo repeat containing 2 (Armc2), mRNA [NM_001034858]                                                                                | -0.56                 | 0.000   | 0.144           |
| Alox15                                      | NM_009660                  | ref Mus musculus arachidonate 15-lipoxygenase (Alox15), mRNA [NM_009660]                                                                                   | -0.56                 | 0.032   | 1.000           |
| Mme11                                       | NM_013783                  | ref Mus musculus membrane metallo-endopeptidase-like 1 (Mme11), mRNA [NM_013783]                                                                           | -0.56                 | 0.018   | 0.865           |
| Tceal7                                      | NM_001127169               | ref Mus musculus transcription elongation factor A (SII)-like 7 (Tceal7), mRNA [NM_001127169]                                                              | -0.56                 | 0.002   | 0.392           |
| chr7:119735208-119822808_F                  | chr7:119735208-119822808_F | lincRNA:chr7:119735208-119822808 forward strand                                                                                                            | -0.57                 | 0.014   | 0.817           |
| Ptgds                                       | NM_008963                  | ref Mus musculus prostaglandin D2 synthase (brain) (Ptgds), mRNA [NM_008963]                                                                               | -0.57                 | 0.000   | 0.031           |
| ENSMUST00000044774                          | ENSMUST00000044774         | ens RIKEN cDNA 4930520K10 gene Gene [Source:MGI Symbol;Acc:MGI:1914837] [ENSMUST00000044774]                                                               | -0.57                 | 0.015   | 0.833           |
| chr13:66888650-66902600_R                   | chr13:66888650-66902600_R  | lincRNA:chr13:66888650-66902600 reverse strand                                                                                                             | -0.58                 | 0.018   | 0.865           |
| chr3:93151210-93151777_F                    | chr3:93151210-93151777_F   | lincRNA:chr3:93151210-93151777 forward strand                                                                                                              | -0.58                 | 0.006   | 0.641           |
| Adh1                                        | NM_007409                  | ref Mus musculus alcohol dehydrogenase 1 (class I) (Adh1), mRNA [NM_007409]                                                                                | -0.58                 | 0.001   | 0.268           |
| Ivns1abp                                    | NM_001039511               | ref Mus musculus influenza virus NS1A binding protein (Ivns1abp), transcript variant 1, mRNA [NM_001039511]                                                | -0.58                 | 0.000   | 0.031           |
| chr9:118059348-118079494_F                  | chr9:118059348-118079494_F | lincRNA:chr9:118059348-118079494 forward strand                                                                                                            | -0.58                 | 0.050   | 1.000           |

Online Supplemental Table IV: mG4H-Veh Only

| Gene Symbol                 | RefSeq                      | Description                                                                                                                                                                                    | logFC<br>mG4H-<br>Veh | P-value | Adj.<br>P-value |
|-----------------------------|-----------------------------|------------------------------------------------------------------------------------------------------------------------------------------------------------------------------------------------|-----------------------|---------|-----------------|
| 5830405M20Rik               | AK017899                    | gb Mus musculus adult male thymus cDNA, RIKEN full-length enriched library, clone:5830405M20 product:similar to RIBOSOMAL PROTEIN S6 (FRAGMENT) [Sus scrofa], full insert sequence. [AK017899] | -0.59                 | 0.014   | 0.825           |
| Fah                         | NM_010176                   | ref Mus musculus fumarylacetoacetate hydrolase (Fah), mRNA [NM_010176]                                                                                                                         | -0.59                 | 0.000   | 0.020           |
| Itln1                       | NM_010584                   | ref Mus musculus intelectin 1 (galactofuranose binding) (Itln1), mRNA [NM_010584]                                                                                                              | -0.59                 | 0.022   | 0.929           |
| LOC100046729                | XM_001476714                | ref PREDICTED: Mus musculus similar to vomeronasal receptor V1RG10 (LOC100046729), mRNA [XM_001476714]                                                                                         | -0.59                 | 0.005   | 0.589           |
| Aadacl3                     | NM_001085503                | ref Mus musculus arylacetamide deacetylase-like 3 (Aadacl3), mRNA [NM_001085503]                                                                                                               | -0.59                 | 0.026   | 0.971           |
| 2900079G21Rik               | NR_033433                   | ref Mus musculus RIKEN cDNA 2900079G21 gene (2900079G21Rik), transcript variant 4, non-coding RNA [NR_033433]                                                                                  | -0.60                 | 0.035   | 1.000           |
| Gstm2                       | NM_008183                   | ref Mus musculus glutathione S-transferase, mu 2 (Gstm2), mRNA [NM_008183]                                                                                                                     | -0.60                 | 0.000   | 0.018           |
| Gm7247                      | ENSMUST00000089789          | ens predicted gene 7247 Gene [Source:MGI Symbol;Acc:MGI:3643454] [ENSMUST00000089789]                                                                                                          | -0.60                 | 0.046   | 1.000           |
| LOC100046614                | XM_001476510                | ref PREDICTED: Mus musculus hypothetical protein LOC100046614 (LOC100046614), mRNA [XM_001476510]                                                                                              | -0.60                 | 0.042   | 1.000           |
| Slc22a16                    | NM_027572                   | ref Mus musculus solute carrier family 22 (organic cation transporter), member 16 (Slc22a16), mRNA [NM_027572]                                                                                 | -0.60                 | 0.022   | 0.921           |
| chr15:61870759-61938796_F   | chr15:61870759-61938796_F   | lincRNA:chr15:61870759-61938796 forward strand                                                                                                                                                 | -0.61                 | 0.022   | 0.922           |
| Matn3                       | NM_010770                   | ref Mus musculus matrilin 3 (Matn3), mRNA [NM_010770]                                                                                                                                          | -0.62                 | 0.011   | 0.781           |
| Gm5756                      | XM_488335                   | ref PREDICTED: Mus musculus predicted gene, EG436197 (EG436197), mRNA [XM_488335]                                                                                                              | -0.62                 | 0.039   | 1.000           |
| chr5:22801058-22939737_F    | chr5:22801058-22939737_F    | lincRNA:chr5:22801058-22939737 forward strand                                                                                                                                                  | -0.63                 | 0.006   | 0.631           |
| chr7:3309825-3331151_R      | chr7:3309825-3331151_R      | lincRNA:chr7:3309825-3331151 reverse strand                                                                                                                                                    | -0.63                 | 0.048   | 1.000           |
| chr19:4994325-4994537_R     | chr19:4994325-4994537_R     | lincRNA:chr19:4994325-4994537 reverse strand                                                                                                                                                   | -0.64                 | 0.015   | 0.838           |
| Aqp8                        | NM_007474                   | ref Mus musculus aquaporin 8 (Aqp8), transcript variant 1, mRNA [NM_007474]                                                                                                                    | -0.64                 | 0.012   | 0.786           |
| chr12:110026982-110027450_F | chr12:110026982-110027450_F | lincRNA:chr12:110026982-110027450 forward strand                                                                                                                                               | -0.64                 | 0.049   | 1.000           |
| Olf1162                     | NM_001011835                | ref Mus musculus olfactory receptor 1162 (Olf1162), mRNA [NM_001011835]                                                                                                                        | -0.64                 | 0.012   | 0.786           |
| chr11:68200716-68214458_F   | chr11:68200716-68214458_F   | lincRNA:chr11:68200716-68214458 forward strand                                                                                                                                                 | -0.65                 | 0.005   | 0.594           |
| Gstm2                       | NM_008183                   | ref Mus musculus glutathione S-transferase, mu 2 (Gstm2), mRNA [NM_008183]                                                                                                                     | -0.65                 | 0.000   | 0.044           |
| ENSMUST00000103501          | ENSMUST00000103501          | gb Mouse Ig rearranged gamma-chain mRNA, clone AN11g. [M19903]                                                                                                                                 | -0.65                 | 0.035   | 1.000           |
| Olf1020                     | NM_146580                   | ref Mus musculus olfactory receptor 1020 (Olf1020), mRNA [NM_146580]                                                                                                                           | -0.65                 | 0.015   | 0.832           |
| 4921521D15Rik               | AK014936                    | gb Mus musculus adult male testis cDNA, RIKEN full-length enriched library, clone:4921521D15 product:unclassifiable, full insert sequence. [AK014936]                                          | -0.66                 | 0.015   | 0.831           |
| Bsx                         | NM_178245                   | ref Mus musculus brain specific homeobox (Bsx), mRNA [NM_178245]                                                                                                                               | -0.67                 | 0.035   | 1.000           |
| chr13:81773237-81783062_F   | chr13:81773237-81783062_F   | lincRNA:chr13:81773237-81783062 forward strand                                                                                                                                                 | -0.67                 | 0.028   | 0.984           |

Online Supplemental Table IV: mG4H-Veh Only

| Gene Symbol                 | RefSeq                      | Description                                                                                                                                                    | logFC<br>mG4H-<br>Veh | P-value | Adj.<br>P-value |
|-----------------------------|-----------------------------|----------------------------------------------------------------------------------------------------------------------------------------------------------------|-----------------------|---------|-----------------|
| 4921506M07Rik               | NM_001037743                | ref Mus musculus RIKEN cDNA 4921506M07 gene (4921506M07Rik), mRNA [NM_001037743]                                                                               | -0.67                 | 0.036   | 1.000           |
| 1700072E05Rik               | NM_028554                   | ref Mus musculus RIKEN cDNA 1700072E05 gene (1700072E05Rik), mRNA [NM_028554]                                                                                  | -0.70                 | 0.012   | 0.786           |
| chr10:27466235-27529430_R   | chr10:27466235-27529430_R   | lincRNA:chr10:27466235-27529430 reverse strand                                                                                                                 | -0.71                 | 0.017   | 0.854           |
| Ppp1r3g                     | NM_029628                   | ref Mus musculus protein phosphatase 1, regulatory (inhibitor) subunit 3G (Ppp1r3g), mRNA [NM_029628]                                                          | -0.71                 | 0.009   | 0.720           |
| 4933435F18Rik               | AK077986                    | gb Mus musculus 13 days embryo male testis cDNA, RIKEN full-length enriched library, clone:6030496F17 product:unclassifiable, full insert sequence. [AK077986] | -0.72                 | 0.041   | 1.000           |
| chr10:107854124-107888749_F | chr10:107854124-107888749_F | lincRNA:chr10:107854124-107888749 forward strand                                                                                                               | -0.73                 | 0.049   | 1.000           |
| chr7:6302922-6306477_F      | chr7:6302922-6306477_F      | lincRNA:chr7:6302922-6306477 forward strand                                                                                                                    | -0.73                 | 0.008   | 0.691           |
| Olfr1110                    | NM_146769                   | ref Mus musculus olfactory receptor 1110 (Olfr1110), mRNA [NM_146769]                                                                                          | -0.75                 | 0.012   | 0.786           |
| Gnmt                        | NM_010321                   | ref Mus musculus glycine N-methyltransferase (Gnmt), mRNA [NM_010321]                                                                                          | -0.75                 | 0.000   | 0.022           |
| Gm2374                      | XM_001473349                | ref PREDICTED: Mus musculus hypothetical protein LOC100039696 (LOC100039696), mRNA [XM_001473349]                                                              | -0.75                 | 0.006   | 0.624           |
| chr7:69075022-69127242_R    | chr7:69075022-69127242_R    | lincRNA:chr7:69075022-69127242 reverse strand                                                                                                                  | -0.76                 | 0.049   | 1.000           |
| Fam23a                      | NM_001081310                | ref Mus musculus family with sequence similarity 23, member A (Fam23a), mRNA [NM_001081310]                                                                    | -0.76                 | 0.039   | 1.000           |
| chr13:79076865-79077207_F   | chr13:79076865-79077207_F   | lincRNA:chr13:79076865-79077207 forward strand                                                                                                                 | -0.78                 | 0.044   | 1.000           |
| Gm4495                      | XM_001480146                | ref PREDICTED: Mus musculus hypothetical protein LOC100043520 (LOC100043520), mRNA [XM_001480146]                                                              | -0.80                 | 0.004   | 0.516           |
| Aqp8                        | NM_007474                   | ref Mus musculus aquaporin 8 (Aqp8), transcript variant 1, mRNA [NM_007474]                                                                                    | -0.82                 | 0.002   | 0.409           |
| LOC100041867                | XM_001477142                | ref PREDICTED: Mus musculus hypothetical protein LOC100041867 (LOC100041867), mRNA [XM_001477142]                                                              | -0.82                 | 0.029   | 0.986           |
| Aox4                        | NM_023631                   | ref Mus musculus aldehyde oxidase 4 (Aox4), mRNA [NM_023631]                                                                                                   | -0.82                 | 0.040   | 1.000           |
| XIST                        | XIST                        | lincRNA:chrX:100655711-100678572 reverse strand                                                                                                                | -0.83                 | 0.046   | 1.000           |
| chr13:38731361-38735655_F   | chr13:38731361-38735655_F   | lincRNA:chr13:38731361-38735655 forward strand                                                                                                                 | -0.84                 | 0.039   | 1.000           |
| A930038B10Rik               | AK044736                    | gb Mus musculus adult retina cDNA, RIKEN full-length enriched library, clone:A930038B10 product:hypothetical protein, full insert sequence. [AK044736]         | -0.84                 | 0.002   | 0.347           |
| chr7:71107125-71112622_F    | chr7:71107125-71112622_F    | lincRNA:chr7:71107125-71112622 forward strand                                                                                                                  | -0.84                 | 0.008   | 0.710           |
| Olfr135                     | NM_146332                   | ref Mus musculus olfactory receptor 135 (Olfr135), mRNA [NM_146332]                                                                                            | -0.85                 | 0.017   | 0.854           |
| chr13:99465269-99472596_F   | chr13:99465269-99472596_F   | lincRNA:chr13:99465269-99472596 forward strand                                                                                                                 | -0.87                 | 0.039   | 1.000           |
| Gm2419                      | XM_001473482                | ref PREDICTED: Mus musculus hypothetical protein LOC100039772 (LOC100039772), mRNA [XM_001473482]                                                              | -0.87                 | 0.004   | 0.516           |
| 4930434B07Rik               | AK015307                    | gb Mus musculus adult male testis cDNA, RIKEN full-length enriched library, clone:4930434B07 product:unclassifiable, full insert sequence. [AK015307]          | -0.88                 | 0.040   | 1.000           |
| Slc2a1                      | NM_011400                   | ref Mus musculus solute carrier family 2 (facilitated glucose transporter), member 1 (Slc2a1), mRNA [NM_011400]                                                | -0.88                 | 0.000   | 0.009           |

Online Supplemental Table IV: mG4H-Veh Only

| Gene Symbol               | RefSeq                    | Description                                                                                               | logFC<br>mG4H-<br>Veh | P-value | Adj.<br>P-value |
|---------------------------|---------------------------|-----------------------------------------------------------------------------------------------------------|-----------------------|---------|-----------------|
| chr8:44232164-44266991_F  | chr8:44232164-44266991_F  | lincRNA:chr8:44232164-44266991 forward strand                                                             | -0.90                 | 0.029   | 0.986           |
| chr10:87541696-87547421_F | chr10:87541696-87547421_F | lincRNA:chr10:87541696-87547421 forward strand                                                            | -0.93                 | 0.025   | 0.966           |
| Sprr2h                    | NM_011474                 | ref Mus musculus small proline-rich protein 2H (Sprr2h), mRNA [NM_011474]                                 | -0.97                 | 0.018   | 0.873           |
| LOC100048471              | XM_001480317              | ref PREDICTED: Mus musculus similar to immunoreceptor Ly49i7 (LOC100048471), mRNA [XM_001480317]          | -1.01                 | 0.041   | 1.000           |
| chr8:49858771-49859010_R  | chr8:49858771-49859010_R  | lincRNA:chr8:49858771-49859010 reverse strand                                                             | -1.01                 | 0.043   | 1.000           |
| Ssxb6                     | XM_001474364              | ref PREDICTED: Mus musculus synovial sarcoma, X member B, breakpoint 6 (Ssxb6), mRNA [XM_001474364]       | -1.01                 | 0.031   | 0.998           |
| Ncam2                     | NM_010954                 | ref Mus musculus neural cell adhesion molecule 2 (Ncam2), transcript variant 2, mRNA [NM_010954]          | -1.04                 | 0.020   | 0.895           |
| ENSMUST00000032909        | ENSMUST00000032909        | ens phosphodiesterase 3B, cGMP-inhibited Gene [Source:MGI (curated);Acc:MGI:1333863] [ENSMUST00000032909] | -1.05                 | 0.034   | 1.000           |
| chr14:14688472-14747272_R | chr14:14688472-14747272_R | lincRNA:chr14:14688472-14747272 reverse strand                                                            | -1.10                 | 0.048   | 1.000           |
| Itgb1bp3                  | NM_027120                 | ref Mus musculus integrin beta 1 binding protein 3 (Itgb1bp3), mRNA [NM_027120]                           | -1.12                 | 0.000   | 0.132           |
| LOC100047123              | XM_001477443              | ref PREDICTED: Mus musculus hypothetical protein LOC100047123 (LOC100047123), mRNA [XM_001477443]         | -1.18                 | 0.000   | 0.012           |
| LOC100046778              | XM_001476791              | ref PREDICTED: Mus musculus hypothetical protein LOC100046778 (LOC100046778), mRNA [XM_001476791]         | -1.18                 | 0.010   | 0.762           |
| Ccdc129                   | NM_001081665              | ref Mus musculus coiled-coil domain containing 129 (Ccdc129), mRNA [NM_001081665]                         | -1.35                 | 0.017   | 0.858           |
| Olfr665                   | NM_146814                 | ref Mus musculus olfactory receptor 665 (Olfr665), mRNA [NM_146814]                                       | -1.46                 | 0.039   | 1.000           |
| chr3:45163252-45179177_F  | chr3:45163252-45179177_F  | lincRNA:chr3:45163252-45179177 forward strand                                                             | -1.56                 | 0.027   | 0.983           |
| chr12:86421771-86422222_F | chr12:86421771-86422222_F | lincRNA:chr12:86421771-86422222 forward strand                                                            | -1.96                 | 0.017   | 0.858           |



Online Supplemental Table IV: mG4H-STZ Only

| Gene Symbol                 | RefSeq                      | Description                                                                                                        | logFC<br>mG4H-<br>STZ | P-value | Adj.<br>P-value |
|-----------------------------|-----------------------------|--------------------------------------------------------------------------------------------------------------------|-----------------------|---------|-----------------|
| chr10:39659425-39674200_F   | chr10:39659425-39674200_F   | lincRNA:chr10:39659425-39674200 forward strand                                                                     | 2.03                  | 0.026   | 0.470           |
| ENSMUST00000070587          | ENSMUST00000070587          | ens RIKEN cDNA 5730596B20 gene Gene [Source:MGI Symbol;Acc:MGI:1924830] [ENSMUST00000070587]                       | 1.58                  | 0.017   | 0.429           |
| Mup20                       | NM_001012323                | ref Mus musculus major urinary protein 20 (Mup20), mRNA [NM_001012323]                                             | 1.54                  | 0.029   | 0.477           |
| LOC639450                   | ENSMUST00000104995          | ens olfactory receptor 364, pseudogene 1 Pseudogene [Source:MGI (curated);Acc:MGI:3030198] [ENSMUST00000104995]    | 1.29                  | 0.024   | 0.459           |
| chrX:123306246-123307974_F  | chrX:123306246-123307974_F  | lincRNA:chrX:123306246-123307974 forward strand                                                                    | 1.22                  | 0.046   | 0.513           |
| ENSMUST00000105501          | ENSMUST00000105501          | ens forkhead box O3 Gene [Source:MGI (curated);Acc:MGI:1890081] [ENSMUST00000105501]                               | 1.21                  | 0.036   | 0.495           |
| Olfr804                     | NM_001011821                | ref Mus musculus olfactory receptor 804 (Olfr804), mRNA [NM_001011821]                                             | 1.20                  | 0.033   | 0.490           |
| XM_001474492                | XM_001474492                | ref PREDICTED: Mus musculus hypothetical protein LOC100040207 (LOC100040207), mRNA [XM_001474492]                  | 1.16                  | 0.022   | 0.450           |
| chr6:12062275-12075800_F    | chr6:12062275-12075800_F    | lincRNA:chr6:12062275-12075800 forward strand                                                                      | 1.13                  | 0.017   | 0.429           |
| chr3:40929393-40929706_F    | chr3:40929393-40929706_F    | lincRNA:chr3:40929393-40929706 forward strand                                                                      | 1.13                  | 0.011   | 0.407           |
| chr1:87412059-87419385_F    | chr1:87412059-87419385_F    | lincRNA:chr1:87412059-87419385 forward strand                                                                      | 1.13                  | 0.032   | 0.485           |
| Ccdc116                     | NM_029779                   | ref Mus musculus coiled-coil domain containing 116 (Ccdc116), transcript variant 2, mRNA [NM_029779]               | 1.10                  | 0.018   | 0.435           |
| Uox                         | NM_009474                   | ref Mus musculus urate oxidase (Uox), mRNA [NM_009474]                                                             | 1.07                  | 0.020   | 0.443           |
| chr11:96111499-96126224_R   | chr11:96111499-96126224_R   | lincRNA:chr11:96111499-96126224 reverse strand                                                                     | 1.05                  | 0.037   | 0.498           |
| LOC641136                   | XM_918475                   | ref PREDICTED: Mus musculus hypothetical LOC641136 (LOC641136), mRNA [XM_918475]                                   | 1.04                  | 0.040   | 0.501           |
| chr17:21785442-21801542_R   | chr17:21785442-21801542_R   | lincRNA:chr17:21785442-21801542 reverse strand                                                                     | 1.03                  | 0.028   | 0.476           |
| Celf6                       | NM_175235                   | ref Mus musculus CUGBP, Elav-like family member 6 (Celf6), mRNA [NM_175235]                                        | 1.02                  | 0.017   | 0.429           |
| Mmp8                        | NM_008611                   | ref Mus musculus matrix metalloproteinase 8 (Mmp8), mRNA [NM_008611]                                               | 1.01                  | 0.009   | 0.400           |
| Gm4379                      | XM_001480003                | ref PREDICTED: Mus musculus similar to reproductive homeobox on X chromosome 8 (LOC100043350), mRNA [XM_001480003] | 1.00                  | 0.032   | 0.483           |
| LOC100045783                | XM_001474931                | ref PREDICTED: Mus musculus similar to reproductive homeobox on X chromosome 8 (LOC100045783), mRNA [XM_001474931] | 1.00                  | 0.021   | 0.448           |
| Crh                         | NM_205769                   | ref Mus musculus corticotropin releasing hormone (Crh), mRNA [NM_205769]                                           | 1.00                  | 0.007   | 0.379           |
| Olfr570                     | NM_147110                   | ref Mus musculus olfactory receptor 570 (Olfr570), mRNA [NM_147110]                                                | 0.99                  | 0.027   | 0.471           |
| chr5:113749473-113750726_R  | chr5:113749473-113750726_R  | lincRNA:chr5:113749473-113750726 reverse strand                                                                    | 0.97                  | 0.005   | 0.343           |
| Obox5                       | NM_145709                   | ref Mus musculus oocyte specific homeobox 5 (Obox5), mRNA [NM_145709]                                              | 0.97                  | 0.035   | 0.495           |
| chr10:116814196-116920696_F | chr10:116814196-116920696_F | lincRNA:chr10:116814196-116920696 forward strand                                                                   | 0.96                  | 0.029   | 0.477           |
| Dlx2                        | NM_010054                   | ref Mus musculus distal-less homeobox 2 (Dlx2), mRNA [NM_010054]                                                   | 0.94                  | 0.014   | 0.418           |

| Online Supplemental Table IV: mG4H-STZ Only |                             |                                                                                                                                                   |                       |         |                 |
|---------------------------------------------|-----------------------------|---------------------------------------------------------------------------------------------------------------------------------------------------|-----------------------|---------|-----------------|
| Gene Symbol                                 | RefSeq                      | Description                                                                                                                                       | logFC<br>mG4H-<br>STZ | P-value | Adj.<br>P-value |
| 4933417A18Rik                               | NM_025750                   | ref  Mus musculus RIKEN cDNA 4933417A18 gene (4933417A18Rik), mRNA [NM_025750]                                                                    | 0.94                  | 0.005   | 0.349           |
| chr13:15947521-15999246_F                   | chr13:15947521-15999246_F   | lincRNA:chr13:15947521-15999246 forward strand                                                                                                    | 0.92                  | 0.023   | 0.454           |
| chr16:40070103-40073270_F                   | chr16:40070103-40073270_F   | lincRNA:chr16:40070103-40073270 forward strand                                                                                                    | 0.92                  | 0.010   | 0.401           |
| chr1:42689799-42749799_F                    | chr1:42689799-42749799_F    | lincRNA:chr1:42689799-42749799 forward strand                                                                                                     | 0.90                  | 0.011   | 0.406           |
| LOC100048326                                | XR_034501                   | ref  PREDICTED: Mus musculus similar to Acidic ribosomal phosphoprotein P0 (LOC100048326), misc RNA [XR_034501]                                   | 0.89                  | 0.011   | 0.407           |
| Olfr1360                                    | NM_146543                   | ref  Mus musculus olfactory receptor 1360 (Olfr1360), mRNA [NM_146543]                                                                            | 0.88                  | 0.014   | 0.412           |
| Fpr-rs4                                     | NM_008041                   | ref  Mus musculus formyl peptide receptor, related sequence 4 (Fpr-rs4), mRNA [NM_008041]                                                         | 0.88                  | 0.036   | 0.495           |
| Sds                                         | NM_145565                   | ref  Mus musculus serine dehydratase (Sds), mRNA [NM_145565]                                                                                      | 0.88                  | 0.015   | 0.418           |
| Olfr710                                     | NM_146601                   | ref  Mus musculus olfactory receptor 710 (Olfr710), mRNA [NM_146601]                                                                              | 0.87                  | 0.012   | 0.412           |
| Pabpc1l2a-ps                                | XM_141989                   | ref  PREDICTED: Mus musculus predicted gene, EG245545 (EG245545), mRNA [XM_141989]                                                                | 0.87                  | 0.004   | 0.338           |
| chr10:94134000-94149200_F                   | chr10:94134000-94149200_F   | lincRNA:chr10:94134000-94149200 forward strand                                                                                                    | 0.87                  | 0.042   | 0.507           |
| Olfr247                                     | NM_146269                   | ref  Mus musculus olfactory receptor 247 (Olfr247), mRNA [NM_146269]                                                                              | 0.86                  | 0.020   | 0.447           |
| chr10:96098058-96098623_F                   | chr10:96098058-96098623_F   | lincRNA:chr10:96098058-96098623 forward strand                                                                                                    | 0.86                  | 0.034   | 0.491           |
| chr16:21305700-21306107_F                   | chr16:21305700-21306107_F   | lincRNA:chr16:21305700-21306107 forward strand                                                                                                    | 0.86                  | 0.002   | 0.281           |
| chr4:40194362-40202712_F                    | chr4:40194362-40202712_F    | lincRNA:chr4:40194362-40202712 forward strand                                                                                                     | 0.86                  | 0.016   | 0.423           |
| Dnajc5                                      | ENSMUST00000108796          | ens  Dnaj (Hsp40) homolog, subfamily C, member 5 Gene [Source:MGI (curated);Acc:MGI:892995] [ENSMUST00000108796]                                  | 0.85                  | 0.003   | 0.305           |
| chr6:47915489-47916089_F                    | chr6:47915489-47916089_F    | lincRNA:chr6:47915489-47916089 forward strand                                                                                                     | 0.85                  | 0.007   | 0.378           |
| Spint3                                      | NM_001177401                | ref  Mus musculus serine peptidase inhibitor, Kunitz type, 3 (Spint3), mRNA [NM_001177401]                                                        | 0.85                  | 0.030   | 0.477           |
| Neb                                         | NM_010889                   | ref  Mus musculus nebulin (Neb), mRNA [NM_010889]                                                                                                 | 0.85                  | 0.018   | 0.435           |
| Gm8223                                      | XM_985275                   | ref  PREDICTED: Mus musculus predicted gene, EG666666 (EG666666), mRNA [XM_985275]                                                                | 0.84                  | 0.018   | 0.435           |
| Stx3                                        | NM_001025307                | ref  Mus musculus syntaxin 3 (Stx3), transcript variant B, mRNA [NM_001025307]                                                                    | 0.84                  | 0.008   | 0.391           |
| A930005G22Rik                               | AK044281                    | gb  Mus musculus adult retina cDNA, RIKEN full-length enriched library, clone:A930005G22 product:unclassifiable, full insert sequence. [AK044281] | 0.84                  | 0.005   | 0.341           |
| Gm3296                                      | XM_001476263                | ref  PREDICTED: Mus musculus hypothetical protein LOC100041371 (LOC100041371), mRNA [XM_001476263]                                                | 0.84                  | 0.049   | 0.519           |
| Gm3840                                      | XM_001478181                | ref  PREDICTED: Mus musculus similar to dentin sialophosphoprotein preproprotein (LOC100042430), mRNA [XM_001478181]                              | 0.83                  | 0.015   | 0.419           |
| chr12:111287772-111333890_F                 | chr12:111287772-111333890_F | lincRNA:chr12:111287772-111333890 forward strand                                                                                                  | 0.83                  | 0.004   | 0.325           |
| Ptk6                                        | NM_009184                   | ref  Mus musculus PTK6 protein tyrosine kinase 6 (Ptk6), mRNA [NM_009184]                                                                         | 0.83                  | 0.022   | 0.453           |

Online Supplemental Table IV: mG4H-STZ Only

| Gene Symbol                | RefSeq                     | Description                                                                                                              | logFC<br>mG4H-<br>STZ | P-value | Adj.<br>P-value |
|----------------------------|----------------------------|--------------------------------------------------------------------------------------------------------------------------|-----------------------|---------|-----------------|
| Slc9a10                    | NM_198106                  | ref  Mus musculus solute carrier family 9, member 10 (Slc9a10), mRNA [NM_198106]                                         | 0.83                  | 0.013   | 0.412           |
| LOC100042435               | XM_001477675               | ref  PREDICTED: Mus musculus similar to Sty2 protein (LOC100042435), mRNA [XM_001477675]                                 | 0.82                  | 0.037   | 0.497           |
| Gm2478                     | XM_001473735               | ref  PREDICTED: Mus musculus hypothetical protein LOC100039894 (LOC100039894), mRNA [XM_001473735]                       | 0.82                  | 0.033   | 0.487           |
| ENSMUST00000064809         | ENSMUST00000064809         | ens  Putative uncharacterized protein [Source:UniProtKB/TrEMBL;Acc:Q8BYT7] [ENSMUST00000064809]                          | 0.82                  | 0.048   | 0.518           |
| chr9:106170918-106177894_R | chr9:106170918-106177894_R | lincRNA:chr9:106170918-106177894 reverse strand                                                                          | 0.82                  | 0.003   | 0.290           |
| ENSMUST00000065124         | ENSMUST00000065124         | ens  RIKEN cDNA 6530403G13 gene Gene [Source:MGI Symbol;Acc:MGI:1923477] [ENSMUST00000065124]                            | 0.82                  | 0.028   | 0.474           |
| ENSMUST00000107481         | ENSMUST00000107481         | ref  PREDICTED: Mus musculus similar to Predicted gene, OTTMUSG00000007485 (LOC100039019), misc RNA [XR_030567]          | 0.81                  | 0.016   | 0.425           |
| chr12:21535610-21560351_F  | chr12:21535610-21560351_F  | lincRNA:chr12:21535610-21560351 forward strand                                                                           | 0.81                  | 0.044   | 0.512           |
| chr5:100845342-100869667_F | chr5:100845342-100869667_F | lincRNA:chr5:100845342-100869667 forward strand                                                                          | 0.81                  | 0.006   | 0.369           |
| chr2:153163620-153170845_F | chr2:153163620-153170845_F | lincRNA:chr2:153163620-153170845 forward strand                                                                          | 0.81                  | 0.033   | 0.490           |
| Igfbp2                     | NM_008342                  | ref  Mus musculus insulin-like growth factor binding protein 2 (Igfbp2), mRNA [NM_008342]                                | 0.81                  | 0.037   | 0.496           |
| Pnpla2                     | NM_001163689               | ref  Mus musculus patatin-like phospholipase domain containing 2 (Pnpla2), transcript variant 1, mRNA [NM_001163689]     | 0.81                  | 0.007   | 0.383           |
| Gm7762                     | XM_979107                  | ref  PREDICTED: Mus musculus RIKEN cDNA C330022B21 gene (LOC665738), mRNA [XM_979107]                                    | 0.81                  | 0.035   | 0.495           |
| chr4:128727331-128735227_R | chr4:128727331-128735227_R | lincRNA:chr4:128727331-128735227 reverse strand                                                                          | 0.80                  | 0.001   | 0.197           |
| Apoc3                      | NM_023114                  | ref  Mus musculus apolipoprotein C-III (Apoc3), mRNA [NM_023114]                                                         | 0.80                  | 0.049   | 0.519           |
| chr16:64796849-64843249_R  | chr16:64796849-64843249_R  | lincRNA:chr16:64796849-64843249 reverse strand                                                                           | 0.80                  | 0.040   | 0.504           |
| chr3:37797734-37891650_F   | chr3:37797734-37891650_F   | lincRNA:chr3:37797734-37891650 forward strand                                                                            | 0.80                  | 0.031   | 0.482           |
| Atp6v1c2                   | NM_133699                  | ref  Mus musculus ATPase, H+ transporting, lysosomal V1 subunit C2 (Atp6v1c2), transcript variant 2, mRNA [NM_133699]    | 0.79                  | 0.016   | 0.426           |
| Mctp2                      | NM_001024703               | ref  Mus musculus multiple C2 domains, transmembrane 2 (Mctp2), mRNA [NM_001024703]                                      | 0.79                  | 0.012   | 0.412           |
| LOC100047902               | XM_001479095               | ref  PREDICTED: Mus musculus similar to RIKEN cDNA 1700022C21 gene (LOC100047902), mRNA [XM_001479095]                   | 0.79                  | 0.022   | 0.452           |
| ENSMUST00000103376         | ENSMUST00000103376         | gb  M.musculus mRNA for 11E7-1 IgM light chain variable region. [X05391]                                                 | 0.79                  | 0.003   | 0.292           |
| LOC100047816               | XM_001478921               | ref  PREDICTED: Mus musculus similar to Dnase1l2 protein (LOC100047816), mRNA [XM_001478921]                             | 0.79                  | 0.032   | 0.483           |
| Klra17                     | NM_133203                  | ref  Mus musculus killer cell lectin-like receptor, subfamily A, member 17 (Klra17), mRNA [NM_133203]                    | 0.79                  | 0.016   | 0.426           |
| chr11:69193873-69194307_F  | chr11:69193873-69194307_F  | lincRNA:chr11:69193873-69194307 forward strand                                                                           | 0.78                  | 0.025   | 0.467           |
| Gm7147                     | XM_909803                  | ref  PREDICTED: Mus musculus similar to novel androgen binding protein (Abp) family member (LOC634929), mRNA [XM_909803] | 0.78                  | 0.023   | 0.453           |

Online Supplemental Table IV: mG4H-STZ Only

| Gene Symbol                | RefSeq                     | Description                                                                                                                                                                | logFC<br>mG4H-<br>STZ | P-value | Adj.<br>P-value |
|----------------------------|----------------------------|----------------------------------------------------------------------------------------------------------------------------------------------------------------------------|-----------------------|---------|-----------------|
| chr2:150008075-150101675_R | chr2:150008075-150101675_R | lincRNA:chr2:150008075-150101675 reverse strand                                                                                                                            | 0.78                  | 0.004   | 0.322           |
| Gm4489                     | NR_027637                  | ref  Mus musculus predicted gene 4489 (Gm4489), non-coding RNA [NR_027637]                                                                                                 | 0.78                  | 0.011   | 0.407           |
| 1500012F01Rik              | NM_001081005               | ref  Mus musculus RIKEN cDNA 1500012F01 gene (1500012F01Rik), mRNA [NM_001081005]                                                                                          | 0.78                  | 0.027   | 0.472           |
| Cts7                       | NM_019539                  | ref  Mus musculus cathepsin 7 (Cts7), mRNA [NM_019539]                                                                                                                     | 0.78                  | 0.020   | 0.441           |
| chr9:32416123-32416560_R   | chr9:32416123-32416560_R   | lincRNA:chr9:32416123-32416560 reverse strand                                                                                                                              | 0.77                  | 0.042   | 0.507           |
| chr12:52944867-52971992_F  | chr12:52944867-52971992_F  | lincRNA:chr12:52944867-52971992 forward strand                                                                                                                             | 0.77                  | 0.033   | 0.490           |
| B230207O21Rik              | AK140083                   | gb  Mus musculus adult male corpora quadrigemina cDNA, RIKEN full-length enriched library, clone:B230207O21 product:hypothetical protein, full insert sequence. [AK140083] | 0.77                  | 0.025   | 0.464           |
| Olfr1023                   | NM_146587                  | ref  Mus musculus olfactory receptor 1023 (Olfr1023), mRNA [NM_146587]                                                                                                     | 0.77                  | 0.024   | 0.460           |
| Hpd                        | NM_008277                  | ref  Mus musculus 4-hydroxyphenylpyruvic acid dioxygenase (Hpd), mRNA [NM_008277]                                                                                          | 0.77                  | 0.001   | 0.234           |
| ENSMUST00000055305         | ENSMUST00000055305         | ens  Mszf58 Fragment [Source:UniProtKB/TrEMBL;Acc:O88242] [ENSMUST00000055305]                                                                                             | 0.76                  | 0.049   | 0.519           |
| chr1:85310067-85323941_R   | chr1:85310067-85323941_R   | lincRNA:chr1:85310067-85323941 reverse strand                                                                                                                              | 0.76                  | 0.033   | 0.490           |
| Dyrk2                      | NM_001014390               | ref  Mus musculus dual-specificity tyrosine-(Y)-phosphorylation regulated kinase 2 (Dyrk2), mRNA [NM_001014390]                                                            | 0.76                  | 0.046   | 0.513           |
| XM_001473879               | XM_001473879               | ref  PREDICTED: Mus musculus hypothetical protein LOC100039974 (LOC100039974), mRNA [XM_001473879]                                                                         | 0.76                  | 0.014   | 0.416           |
| chr9:35112668-35113346_F   | chr9:35112668-35113346_F   | lincRNA:chr9:35112668-35113346 forward strand                                                                                                                              | 0.76                  | 0.029   | 0.477           |
| Olfr749                    | NM_020288                  | ref  Mus musculus olfactory receptor 749 (Olfr749), mRNA [NM_020288]                                                                                                       | 0.75                  | 0.016   | 0.426           |
| Olfr1061                   | NM_207134                  | ref  Mus musculus olfactory receptor 1061 (Olfr1061), mRNA [NM_207134]                                                                                                     | 0.75                  | 0.005   | 0.346           |
| Prg4                       | NM_021400                  | ref  Mus musculus proteoglycan 4 (megakaryocyte stimulating factor, articular superficial zone protein) (Prg4), transcript variant 1, mRNA [NM_021400]                     | 0.75                  | 0.003   | 0.306           |
| chr3:70581406-70614856_F   | chr3:70581406-70614856_F   | lincRNA:chr3:70581406-70614856 forward strand                                                                                                                              | 0.75                  | 0.040   | 0.502           |
| Ctdsp2                     | NM_001113470               | ref  Mus musculus CTD (carboxy-terminal domain, RNA polymerase II, polypeptide A) small phosphatase 2 (Ctdsp2), transcript variant a, mRNA [NM_001113470]                  | 0.75                  | 0.019   | 0.439           |
| chr10:66574421-66575488_F  | chr10:66574421-66575488_F  | lincRNA:chr10:66574421-66575488 forward strand                                                                                                                             | 0.75                  | 0.047   | 0.516           |
| Htr4                       | NM_008313                  | ref  Mus musculus 5 hydroxytryptamine (serotonin) receptor 4 (Htr4), mRNA [NM_008313]                                                                                      | 0.75                  | 0.004   | 0.336           |
| chr10:96103732-96103867_F  | chr10:96103732-96103867_F  | lincRNA:chr10:96103732-96103867 forward strand                                                                                                                             | 0.74                  | 0.026   | 0.470           |
| Pramel4                    | NM_001001319               | ref  Mus musculus preferentially expressed antigen in melanoma like 4 (Pramel4), mRNA [NM_001001319]                                                                       | 0.74                  | 0.000   | 0.117           |
| Ppp2ca                     | ENSMUST00000020608         | ens  protein phosphatase 2 (formerly 2A), catalytic subunit, alpha isoform Gene [Source:MGI (curated);Acc:MGI:1321159] [ENSMUST00000020608]                                | 0.73                  | 0.034   | 0.493           |
| Nxph1                      | NM_008751                  | ref  Mus musculus neurexophilin 1 (Nxph1), mRNA [NM_008751]                                                                                                                | 0.73                  | 0.037   | 0.497           |

Online Supplemental Table IV: mG4H-STZ Only

| Gene Symbol                | RefSeq                     | Description                                                                                                 | logFC<br>mG4H-<br>STZ | P-value | Adj.<br>P-value |
|----------------------------|----------------------------|-------------------------------------------------------------------------------------------------------------|-----------------------|---------|-----------------|
| 1700109G14Rik              | NR_033788                  | ref  Mus musculus RIKEN cDNA 1700109G14 gene (1700109G14Rik), non-coding RNA [NR_033788]                    | 0.73                  | 0.048   | 0.518           |
| Htr1a                      | NM_008308                  | ref  Mus musculus 5-hydroxytryptamine (serotonin) receptor 1A (Htr1a), mRNA [NM_008308]                     | 0.72                  | 0.017   | 0.433           |
| Atxn7l1                    | NM_001033436               | ref  Mus musculus ataxin 7-like 1 (Atxn7l1), transcript variant 1, mRNA [NM_001033436]                      | 0.72                  | 0.023   | 0.456           |
| D14Ertd725e                | BG069320                   | gb  H3075B02-3 NIA Mouse 15K cDNA Clone Set Mus musculus cDNA clone H3075B02 3', mRNA sequence [BG069320]   | 0.72                  | 0.047   | 0.515           |
| chr14:65874977-65880202_R  | chr14:65874977-65880202_R  | lincRNA:chr14:65874977-65880202 reverse strand                                                              | 0.72                  | 0.039   | 0.499           |
| ENSMUST00000110481         | ENSMUST00000110481         | ens  zinc finger protein 192 Gene [Source:MGI (curated);Acc:MGI:1913815] [ENSMUST00000110481]               | 0.72                  | 0.018   | 0.437           |
| Olfr1198                   | NM_207567                  | ref  Mus musculus olfactory receptor 1198 (Olfr1198), mRNA [NM_207567]                                      | 0.72                  | 0.037   | 0.497           |
| chr6:121036119-121036703_R | chr6:121036119-121036703_R | lincRNA:chr6:121036119-121036703 reverse strand                                                             | 0.72                  | 0.023   | 0.454           |
| Gm2884                     | XM_001472565               | ref  PREDICTED: Mus musculus hypothetical protein LOC100044554 (LOC100044554), mRNA [XM_001472565]          | 0.71                  | 0.039   | 0.501           |
| chr2:11454222-11456321_R   | chr2:11454222-11456321_R   | lincRNA:chr2:11454222-11456321 reverse strand                                                               | 0.71                  | 0.018   | 0.437           |
| 4930579D07Rik              | BG067633                   | gb  H3056E06-3 NIA Mouse 15K cDNA Clone Set Mus musculus cDNA clone H3056E06 3', mRNA sequence [BG067633]   | 0.71                  | 0.008   | 0.385           |
| ENSMUST00000025658         | ENSMUST00000025658         | ens  transmembrane channel-like gene family 1 Gene [Source:MGI Symbol;Acc:MGI:2151016] [ENSMUST00000025658] | 0.71                  | 0.001   | 0.197           |
| Krtap17-1                  | NM_001099774               | ref  Mus musculus keratin associated protein 17-1 (Krtap17-1), mRNA [NM_001099774]                          | 0.71                  | 0.028   | 0.474           |
| chr2:83540813-83541273_R   | chr2:83540813-83541273_R   | lincRNA:chr2:83540813-83541273 reverse strand                                                               | 0.71                  | 0.004   | 0.335           |
| chr10:3229404-3229856_F    | chr10:3229404-3229856_F    | lincRNA:chr10:3229404-3229856 forward strand                                                                | 0.71                  | 0.025   | 0.463           |
| Gm9494                     | XM_001479010               | ref  PREDICTED: Mus musculus hypothetical LOC670576 (LOC670576), mRNA [XM_001479010]                        | 0.71                  | 0.040   | 0.501           |
| Ska2l-ps                   | XM_890112                  | ref  PREDICTED: Mus musculus predicted gene, EG625534, transcript variant 2 (EG625534), mRNA [XM_890112]    | 0.71                  | 0.017   | 0.433           |
| chr13:83867711-83878140_F  | chr13:83867711-83878140_F  | lincRNA:chr13:83867711-83878140 forward strand                                                              | 0.71                  | 0.005   | 0.353           |
| Gm12408                    | XM_001474903               | ref  PREDICTED: Mus musculus hypothetical protein LOC100040557 (LOC100040557), mRNA [XM_001474903]          | 0.71                  | 0.025   | 0.463           |
| BC037703                   | NM_172295                  | ref  Mus musculus cDNA sequence BC037703 (BC037703), mRNA [NM_172295]                                       | 0.71                  | 0.012   | 0.408           |
| chr6:86477309-86537554_F   | chr6:86477309-86537554_F   | lincRNA:chr6:86477309-86537554 forward strand                                                               | 0.70                  | 0.021   | 0.450           |
| Vgll3                      | NM_028572                  | ref  Mus musculus vestigial like 3 (Drosophila) (Vgll3), mRNA [NM_028572]                                   | 0.70                  | 0.043   | 0.511           |
| chr13:94194458-94195068_R  | chr13:94194458-94195068_R  | lincRNA:chr13:94194458-94195068 reverse strand                                                              | 0.70                  | 0.023   | 0.455           |
| Apold1                     | NM_001109914               | ref  Mus musculus apolipoprotein L domain containing 1 (Apold1), mRNA [NM_001109914]                        | 0.70                  | 0.039   | 0.500           |
| chr15:59619971-59626514_R  | chr15:59619971-59626514_R  | lincRNA:chr15:59619971-59626514 reverse strand                                                              | 0.70                  | 0.029   | 0.477           |

Online Supplemental Table IV: mG4H-STZ Only

| Gene Symbol                 | RefSeq                      | Description                                                                                                                                                   | logFC<br>mG4H-<br>STZ | P-value | Adj.<br>P-value |
|-----------------------------|-----------------------------|---------------------------------------------------------------------------------------------------------------------------------------------------------------|-----------------------|---------|-----------------|
| chr9:78107225-78118850_R    | chr9:78107225-78118850_R    | lincRNA:chr9:78107225-78118850 reverse strand                                                                                                                 | 0.70                  | 0.035   | 0.494           |
| LOC674590                   | XM_975770                   | ref PREDICTED: Mus musculus similar to budding uninhibited by benzimidazoles 3 homolog (LOC674590), mRNA [XM_975770]                                          | 0.70                  | 0.009   | 0.399           |
| chr13:28477490-28985604_R   | chr13:28477490-28985604_R   | lincRNA:chr13:28477490-28985604 reverse strand                                                                                                                | 0.70                  | 0.027   | 0.472           |
| chr1:92546371-92551596_R    | chr1:92546371-92551596_R    | lincRNA:chr1:92546371-92551596 reverse strand                                                                                                                 | 0.70                  | 0.003   | 0.290           |
| chr11:95644899-95658549_R   | chr11:95644899-95658549_R   | lincRNA:chr11:95644899-95658549 reverse strand                                                                                                                | 0.70                  | 0.009   | 0.398           |
| A530076I17Rik               | AK080140                    | gb Mus musculus adult male aorta and vein cDNA, RIKEN full-length enriched library, clone:A530068K05 product:unclassifiable, full insert sequence. [AK080140] | 0.69                  | 0.027   | 0.471           |
| Slco1b2                     | NM_020495                   | ref Mus musculus solute carrier organic anion transporter family, member 1b2 (Slco1b2), transcript variant 1, mRNA [NM_020495]                                | 0.69                  | 0.011   | 0.406           |
| Cpvl                        | NM_027749                   | ref Mus musculus carboxypeptidase, vitellogenic-like (Cpvl), mRNA [NM_027749]                                                                                 | 0.69                  | 0.010   | 0.401           |
| LOC100045154                | XM_001473762                | ref PREDICTED: Mus musculus similar to submandibular androgen-repressed protein (LOC100045154), mRNA [XM_001473762]                                           | 0.69                  | 0.005   | 0.343           |
| Heph                        | NM_181273                   | ref Mus musculus hephaestin (Heph), transcript variant 2, mRNA [NM_181273]                                                                                    | 0.69                  | 0.010   | 0.403           |
| Vmn1r210                    | NM_134235                   | ref Mus musculus vomeronasal 1 receptor 210 (Vmn1r210), mRNA [NM_134235]                                                                                      | 0.69                  | 0.047   | 0.514           |
| Gjb3                        | NM_001160012                | ref Mus musculus gap junction protein, beta 3 (Gjb3), transcript variant 1, mRNA [NM_001160012]                                                               | 0.69                  | 0.021   | 0.449           |
| Il22ra2                     | NM_178258                   | ref Mus musculus interleukin 22 receptor, alpha 2 (Il22ra2), mRNA [NM_178258]                                                                                 | 0.69                  | 0.042   | 0.508           |
| chr3:95445094-95445564_R    | chr3:95445094-95445564_R    | lincRNA:chr3:95445094-95445564 reverse strand                                                                                                                 | 0.68                  | 0.018   | 0.435           |
| Defa3                       | NM_007850                   | ref Mus musculus defensin, alpha, 3 (Defa3), mRNA [NM_007850]                                                                                                 | 0.68                  | 0.046   | 0.513           |
| Hdx                         | NM_001080549                | ref Mus musculus highly divergent homeobox (Hdx), mRNA [NM_001080549]                                                                                         | 0.68                  | 0.008   | 0.392           |
| Myliip                      | NM_153789                   | ref Mus musculus myosin regulatory light chain interacting protein (Myliip), transcript variant 1, mRNA [NM_153789]                                           | 0.68                  | 0.045   | 0.513           |
| chr2:170029045-170034220_R  | chr2:170029045-170034220_R  | lincRNA:chr2:170029045-170034220 reverse strand                                                                                                               | 0.68                  | 0.012   | 0.408           |
| ENSMUST00000024796          | ENSMUST00000024796          | ens predicted gene 6313 Gene [Source:MGI Symbol;Acc:MGI:3644722] [ENSMUST00000024796]                                                                         | 0.68                  | 0.043   | 0.511           |
| Sult2a1                     | NM_001111296                | ref Mus musculus sulfotransferase family 2A, dehydroepiandrosterone (DHEA)-preferring, member 1 (Sult2a1), mRNA [NM_001111296]                                | 0.68                  | 0.003   | 0.281           |
| chr12:110003268-110030953_F | chr12:110003268-110030953_F | lincRNA:chr12:110003268-110030953 forward strand                                                                                                              | 0.68                  | 0.046   | 0.513           |
| Gm13078                     | NM_001085412                | ref Mus musculus predicted gene 13078 (Gm13078), mRNA [NM_001085412]                                                                                          | 0.68                  | 0.036   | 0.495           |
| LOC627800                   | AK053604                    | gb Mus musculus 0 day neonate eyeball cDNA, RIKEN full-length enriched library, clone:E130113I11 product:unclassifiable, full insert sequence. [AK053604]     | 0.68                  | 0.008   | 0.390           |
| chr14:25923295-25923893_F   | chr14:25923295-25923893_F   | lincRNA:chr14:25923295-25923893 forward strand                                                                                                                | 0.67                  | 0.041   | 0.504           |
| Hgf                         | NM_010427                   | ref Mus musculus hepatocyte growth factor (Hgf), mRNA [NM_010427]                                                                                             | 0.67                  | 0.036   | 0.495           |



Online Supplemental Table IV: mG4H-STZ Only

| Gene Symbol                | RefSeq                     | Description                                                                                                       | logFC<br>mG4H-<br>STZ | P-value | Adj.<br>P-value |
|----------------------------|----------------------------|-------------------------------------------------------------------------------------------------------------------|-----------------------|---------|-----------------|
| chr1:141824450-141835125_F | chr1:141824450-141835125_F | lincRNA:chr1:141824450-141835125 forward strand                                                                   | 0.67                  | 0.003   | 0.299           |
| 1700001N15Rik              | XM_001474474               | ref PREDICTED: Mus musculus RIKEN cDNA 1700001N15 gene (1700001N15Rik), mRNA [XM_001474474]                       | 0.67                  | 0.012   | 0.412           |
| LOC100048337               | XM_001480371               | ref PREDICTED: Mus musculus hypothetical protein LOC100048337 (LOC100048337), mRNA [XM_001480371]                 | 0.67                  | 0.039   | 0.501           |
| chr2:151992806-152025456_F | chr2:151992806-152025456_F | lincRNA:chr2:151992806-152025456 forward strand                                                                   | 0.67                  | 0.037   | 0.496           |
| Tcp11l2                    | NM_146008                  | ref Mus musculus t-complex 11 (mouse) like 2 (Tcp11l2), mRNA [NM_146008]                                          | 0.67                  | 0.016   | 0.427           |
| Pcbp2                      | NM_001103165               | ref Mus musculus poly(rC) binding protein 2 (Pcbp2), transcript variant 1, mRNA [NM_001103165]                    | 0.67                  | 0.027   | 0.472           |
| ENSMUST00000099414         | ENSMUST00000099414         | ens RIKEN cDNA C330022B21 gene Gene [Source:MGI Symbol;Acc:MGI:1925949] [ENSMUST00000099417]                      | 0.67                  | 0.039   | 0.501           |
| chr19:59498190-59531390_R  | chr19:59498190-59531390_R  | lincRNA:chr19:59498190-59531390 reverse strand                                                                    | 0.66                  | 0.007   | 0.382           |
| Gsdmc3                     | NM_183194                  | ref Mus musculus gasdermin C3 (Gsdmc3), mRNA [NM_183194]                                                          | 0.66                  | 0.015   | 0.423           |
| Prdm6                      | NM_001033281               | ref Mus musculus PR domain containing 6 (Prdm6), mRNA [NM_001033281]                                              | 0.66                  | 0.044   | 0.511           |
| Olfr788                    | NM_146551                  | ref Mus musculus olfactory receptor 788 (Olfr788), mRNA [NM_146551]                                               | 0.66                  | 0.028   | 0.475           |
| chr2:174982600-175005825_F | chr2:174982600-175005825_F | lincRNA:chr2:174982600-175005825 forward strand                                                                   | 0.66                  | 0.029   | 0.477           |
| Sbpl                       | NM_001077421               | ref Mus musculus spermine binding protein-like (Sbpl), mRNA [NM_001077421]                                        | 0.66                  | 0.029   | 0.477           |
| chr16:13752215-13764390_F  | chr16:13752215-13764390_F  | lincRNA:chr16:13752215-13764390 forward strand                                                                    | 0.66                  | 0.035   | 0.494           |
| Gm4258                     | XM_001479555               | ref PREDICTED: Mus musculus hypothetical protein LOC100047955 (LOC100047955), mRNA [XM_001479555]                 | 0.66                  | 0.040   | 0.502           |
| chr1:108657255-108667405_R | chr1:108657255-108667405_R | lincRNA:chr1:108657255-108667405 reverse strand                                                                   | 0.66                  | 0.029   | 0.477           |
| chr4:59093960-59122541_R   | chr4:59093960-59122541_R   | lincRNA:chr4:59093960-59122541 reverse strand                                                                     | 0.66                  | 0.048   | 0.517           |
| LOC100045006               | XM_001473539               | ref PREDICTED: Mus musculus hypothetical protein LOC100045006 (LOC100045006), mRNA [XM_001473539]                 | 0.66                  | 0.010   | 0.405           |
| 1700062C10Rik              | XM_001473468               | ref PREDICTED: Mus musculus RIKEN cDNA 1700062C10 gene (1700062C10Rik), mRNA [XM_001473468]                       | 0.66                  | 0.003   | 0.297           |
| Olfr195                    | NM_146998                  | ref Mus musculus olfactory receptor 195 (Olfr195), mRNA [NM_146998]                                               | 0.65                  | 0.011   | 0.406           |
| Olfr63                     | NM_146937                  | ref Mus musculus olfactory receptor 63 (Olfr63), mRNA [NM_146937]                                                 | 0.65                  | 0.004   | 0.325           |
| ENSMUST00000098472         | ENSMUST00000098472         | ens RIKEN cDNA 4930513N10 gene Gene [Source:MGI Symbol;Acc:MGI:2443064] [ENSMUST00000098472]                      | 0.65                  | 0.001   | 0.227           |
| Spam1                      | NM_001079875               | ref Mus musculus sperm adhesion molecule 1 (Spam1), transcript variant 1, mRNA [NM_001079875]                     | 0.65                  | 0.014   | 0.412           |
| chr7:26212709-26230775_F   | chr7:26212709-26230775_F   | lincRNA:chr7:26212709-26230775 forward strand                                                                     | 0.65                  | 0.028   | 0.474           |
| Ghrhr                      | NM_001003685               | ref Mus musculus growth hormone releasing hormone receptor (Ghrhr), mRNA [NM_001003685]                           | 0.65                  | 0.034   | 0.493           |
| Gm3003                     | XM_001475395               | ref PREDICTED: Mus musculus similar to cyclic nucleotide gated channel beta 1 (LOC100040856), mRNA [XM_001475395] | 0.65                  | 0.002   | 0.271           |

Online Supplemental Table IV: mG4H-STZ Only

| Gene Symbol                | RefSeq                     | Description                                                                                                                 | logFC<br>mG4H-<br>STZ | P-value | Adj.<br>P-value |
|----------------------------|----------------------------|-----------------------------------------------------------------------------------------------------------------------------|-----------------------|---------|-----------------|
| Elovl3                     | NM_007703                  | ref  Mus musculus elongation of very long chain fatty acids (FEN1/Elo2, SUR4/Elo3, yeast)-like 3 (Elovl3), mRNA [NM_007703] | 0.65                  | 0.008   | 0.391           |
| ENSMUST00000114607         | ENSMUST00000114607         | ens  enhancer trap locus 4 Gene [Source:MGI (curated);Acc:MGI:95454] [ENSMUST00000114607]                                   | 0.65                  | 0.048   | 0.517           |
| chr15:99762797-99786472_F  | chr15:99762797-99786472_F  | lincRNA:chr15:99762797-99786472 forward strand                                                                              | 0.65                  | 0.027   | 0.472           |
| Olf1033                    | NM_146578                  | ref  Mus musculus olfactory receptor 1033 (Olf1033), mRNA [NM_146578]                                                       | 0.64                  | 0.019   | 0.439           |
| ENSMUST00000112734         | ENSMUST00000112734         | ens  Putative uncharacterized protein [Source:UniProtKB/TrEMBL;Acc:Q3TNN7] [ENSMUST00000112734]                             | 0.64                  | 0.006   | 0.366           |
| chr7:66562376-66579519_F   | chr7:66562376-66579519_F   | lincRNA:chr7:66562376-66579519 forward strand                                                                               | 0.64                  | 0.020   | 0.447           |
| chr10:62262341-62269593_F  | chr10:62262341-62269593_F  | lincRNA:chr10:62262341-62269593 forward strand                                                                              | 0.64                  | 0.033   | 0.488           |
| LOC672552                  | XM_001475103               | ref  PREDICTED: Mus musculus similar to Ly6C antigen (LOC672552), mRNA [XM_001475103]                                       | 0.64                  | 0.044   | 0.512           |
| 4930402F06Rik              | NM_001080709               | ref  Mus musculus RIKEN cDNA 4930402F06 gene (4930402F06Rik), mRNA [NM_001080709]                                           | 0.64                  | 0.049   | 0.519           |
| LOC100044623               | XM_001472729               | ref  PREDICTED: Mus musculus similar to keratin complex 1, acidic, gene 12 (LOC100044623), mRNA [XM_001472729]              | 0.64                  | 0.007   | 0.377           |
| Olf312                     | NM_001011819               | ref  Mus musculus olfactory receptor 312 (Olf312), mRNA [NM_001011819]                                                      | 0.64                  | 0.022   | 0.452           |
| chr7:16584852-16657252_R   | chr7:16584852-16657252_R   | lincRNA:chr7:16584852-16657252 reverse strand                                                                               | 0.63                  | 0.035   | 0.494           |
| Zfp287                     | NM_133208                  | ref  Mus musculus zinc finger protein 287 (Zfp287), mRNA [NM_133208]                                                        | 0.63                  | 0.021   | 0.448           |
| A130030D18Rik              | XM_001476546               | ref  PREDICTED: Mus musculus RIKEN cDNA A130030D18 gene (A130030D18Rik), mRNA [XM_001476546]                                | 0.63                  | 0.016   | 0.425           |
| chr10:66349796-66378261_R  | chr10:66349796-66378261_R  | lincRNA:chr10:66349796-66378261 reverse strand                                                                              | 0.63                  | 0.004   | 0.308           |
| Olf517                     | NM_001011846               | ref  Mus musculus olfactory receptor 517 (Olf517), mRNA [NM_001011846]                                                      | 0.63                  | 0.012   | 0.408           |
| chr17:15357376-15385701_R  | chr17:15357376-15385701_R  | lincRNA:chr17:15357376-15385701 reverse strand                                                                              | 0.63                  | 0.001   | 0.227           |
| Gm8883                     | NR_027658                  | ref  Mus musculus predicted gene 8883 (Gm8883), non-coding RNA [NR_027658]                                                  | 0.63                  | 0.007   | 0.377           |
| chr1:183783306-183834531_R | chr1:183783306-183834531_R | lincRNA:chr1:183783306-183834531 reverse strand                                                                             | 0.63                  | 0.007   | 0.370           |
| Gpr123                     | NM_177469                  | ref  Mus musculus G protein-coupled receptor 123 (Gpr123), mRNA [NM_177469]                                                 | 0.63                  | 0.014   | 0.414           |
| chr17:36130717-36137617_R  | chr17:36130717-36137617_R  | lincRNA:chr17:36130717-36137617 reverse strand                                                                              | 0.63                  | 0.042   | 0.508           |
| Gm2353                     | XM_001472075               | ref  PREDICTED: Mus musculus hypothetical protein LOC100044354 (LOC100044354), mRNA [XM_001472075]                          | 0.63                  | 0.014   | 0.415           |
| chr9:53613193-53613871_F   | chr9:53613193-53613871_F   | lincRNA:chr9:53613193-53613871 forward strand                                                                               | 0.63                  | 0.030   | 0.477           |
| chr13:99870660-99877535_F  | chr13:99870660-99877535_F  | lincRNA:chr13:99870660-99877535 forward strand                                                                              | 0.63                  | 0.038   | 0.498           |
| ENSMUST00000112293         | ENSMUST00000112293         | ens  RIKEN cDNA 1700106N22 gene Gene [Source:MGI Symbol;Acc:MGI:1920832] [ENSMUST00000112293]                               | 0.63                  | 0.034   | 0.493           |
| chr3:145269449-145298239_R | chr3:145269449-145298239_R | lincRNA:chr3:145269449-145298239 reverse strand                                                                             | 0.63                  | 0.036   | 0.495           |

Online Supplemental Table IV: mG4H-STZ Only

| Gene Symbol                | RefSeq                     | Description                                                                                                                                                                   | logFC<br>mG4H-<br>STZ | P-value | Adj.<br>P-value |
|----------------------------|----------------------------|-------------------------------------------------------------------------------------------------------------------------------------------------------------------------------|-----------------------|---------|-----------------|
| Bex6                       | NM_001033539               | ref Mus musculus brain expressed gene 6 (Bex6), mRNA [NM_001033539]                                                                                                           | 0.63                  | 0.003   | 0.282           |
| chr10:96082444-96096696_R  | chr10:96082444-96096696_R  | lincRNA:chr10:96082444-96096696 reverse strand                                                                                                                                | 0.63                  | 0.049   | 0.519           |
| Slc25a2                    | NM_001159275               | ref Mus musculus solute carrier family 25 (mitochondrial carrier, ornithine transporter) member 2 (Slc25a2), nuclear gene encoding mitochondrial protein, mRNA [NM_001159275] | 0.62                  | 0.022   | 0.452           |
| chr8:94849929-94870274_R   | chr8:94849929-94870274_R   | lincRNA:chr8:94849929-94870274 reverse strand                                                                                                                                 | 0.62                  | 0.005   | 0.346           |
| chr2:108456668-108532418_F | chr2:108456668-108532418_F | lincRNA:chr2:108456668-108532418 forward strand                                                                                                                               | 0.62                  | 0.019   | 0.440           |
| AI480461                   | AK148445                   | gb Mus musculus adult pancreas islet cells cDNA, RIKEN full-length enriched library, clone:C820001A05 product:unclassifiable, full insert sequence. [AK148445]                | 0.62                  | 0.046   | 0.513           |
| Mpo                        | AY500847                   | gb Mus musculus myeloperoxidase precursor (Mpo) mRNA, complete cds. [AY500847]                                                                                                | 0.62                  | 0.019   | 0.437           |
| C430049E01Rik              | AK141396                   | gb Mus musculus 7 days embryo whole body cDNA, RIKEN full-length enriched library, clone:C430049E01 product:hypothetical protein, full insert sequence. [AK141396]            | 0.62                  | 0.000   | 0.077           |
| Vipr2                      | NM_009511                  | ref Mus musculus vasoactive intestinal peptide receptor 2 (Vipr2), mRNA [NM_009511]                                                                                           | 0.62                  | 0.005   | 0.354           |
| Krt15                      | NM_008469                  | ref Mus musculus keratin 15 (Krt15), mRNA [NM_008469]                                                                                                                         | 0.62                  | 0.015   | 0.423           |
| Gm2369                     | XM_001473320               | ref PREDICTED: Mus musculus similar to cyclic nucleotide gated channel beta 1 (LOC100039680), mRNA [XM_001473320]                                                             | 0.62                  | 0.047   | 0.514           |
| LOC100048543               | XM_001480480               | ref PREDICTED: Mus musculus similar to glutamine repeat protein-1 (LOC100048543), mRNA [XM_001480480]                                                                         | 0.62                  | 0.041   | 0.504           |
| ENSMUST00000044964         | ENSMUST00000044964         | ens RIKEN cDNA 2210406O10 gene Gene [Source:MGI Symbol;Acc:MGI:1923960] [ENSMUST00000044964]                                                                                  | 0.62                  | 0.022   | 0.452           |
| chr8:90000619-90061169_R   | chr8:90000619-90061169_R   | lincRNA:chr8:90000619-90061169 reverse strand                                                                                                                                 | 0.62                  | 0.027   | 0.471           |
| chr6:39267707-39268180_R   | chr6:39267707-39268180_R   | lincRNA:chr6:39267707-39268180 reverse strand                                                                                                                                 | 0.62                  | 0.029   | 0.477           |
| chr12:15735906-15798506_F  | chr12:15735906-15798506_F  | lincRNA:chr12:15735906-15798506 forward strand                                                                                                                                | 0.61                  | 0.039   | 0.500           |
| chr1:162965001-162966376_F | chr1:162965001-162966376_F | lincRNA:chr1:162965001-162966376 forward strand                                                                                                                               | 0.61                  | 0.013   | 0.412           |
| C630004M23Rik              | AK049866                   | gb Mus musculus adult male hippocampus cDNA, RIKEN full-length enriched library, clone:C630004M23 product:hypothetical protein, full insert sequence. [AK049866]              | 0.61                  | 0.030   | 0.477           |
| C030034E14Rik              | CX239135                   | gb NMA06909 Mus Musculus Lateral Ventricle Wall C57BL [CX239135]                                                                                                              | 0.61                  | 0.050   | 0.520           |
| Ces2                       | NM_145603                  | ref Mus musculus carboxylesterase 2 (Ces2), mRNA [NM_145603]                                                                                                                  | 0.61                  | 0.035   | 0.494           |
| chr6:118250184-118258737_R | chr6:118250184-118258737_R | lincRNA:chr6:118250184-118258737 reverse strand                                                                                                                               | 0.61                  | 0.037   | 0.497           |
| ENSMUST00000097586         | ENSMUST00000097586         | Unknown                                                                                                                                                                       | 0.61                  | 0.019   | 0.437           |
| chr15:97674015-97674423_R  | chr15:97674015-97674423_R  | lincRNA:chr15:97674015-97674423 reverse strand                                                                                                                                | 0.61                  | 0.047   | 0.515           |
| chr15:74476126-74476191_F  | chr15:74476126-74476191_F  | lincRNA:chr15:74476126-74476191 forward strand                                                                                                                                | 0.61                  | 0.004   | 0.316           |

Online Supplemental Table IV: mG4H-STZ Only

| Gene Symbol                 | RefSeq                      | Description                                                                                                                                                    | logFC<br>mG4H-<br>STZ | P-value | Adj.<br>P-value |
|-----------------------------|-----------------------------|----------------------------------------------------------------------------------------------------------------------------------------------------------------|-----------------------|---------|-----------------|
| Gm13954                     | XM_001479906                | ref PREDICTED: Mus musculus hypothetical protein LOC100043394 (LOC100043394), mRNA [XM_001479906]                                                              | 0.60                  | 0.032   | 0.483           |
| chr4:149383134-149451259_R  | chr4:149383134-149451259_R  | lincRNA:chr4:149383134-149451259 reverse strand                                                                                                                | 0.60                  | 0.035   | 0.494           |
| Olf1507                     | NM_001170918                | ref Mus musculus olfactory receptor 1507 (Olf1507), transcript variant 1, mRNA [NM_001170918]                                                                  | 0.60                  | 0.042   | 0.508           |
| chr4:59105222-59122541_R    | chr4:59105222-59122541_R    | lincRNA:chr4:59105222-59122541 reverse strand                                                                                                                  | 0.60                  | 0.035   | 0.495           |
| 4930528H21Rik               | XM_001472326                | ref PREDICTED: Mus musculus RIKEN cDNA 4930528H21 gene (4930528H21Rik), mRNA [XM_001472326]                                                                    | 0.60                  | 0.040   | 0.504           |
| 5830409B07Rik               | XM_985015                   | ref PREDICTED: Mus musculus RIKEN cDNA 5830409B07 gene (5830409B07Rik), mRNA [XM_985015]                                                                       | 0.60                  | 0.042   | 0.507           |
| 9130221J18Rik               | AK033690                    | gb Mus musculus adult male cecum cDNA, RIKEN full-length enriched library, clone:9130221J18 product:unclassifiable, full insert sequence. [AK033690]           | 0.60                  | 0.040   | 0.502           |
| chr6:95418306-95424131_F    | chr6:95418306-95424131_F    | lincRNA:chr6:95418306-95424131 forward strand                                                                                                                  | 0.60                  | 0.014   | 0.412           |
| chr3:78982395-79094345_F    | chr3:78982395-79094345_F    | lincRNA:chr3:78982395-79094345 forward strand                                                                                                                  | 0.60                  | 0.021   | 0.449           |
| Gm7530                      | XR_030886                   | ref PREDICTED: Mus musculus similar to calyculin binding protein (LOC665182), misc RNA [XR_030886]                                                             | 0.60                  | 0.001   | 0.248           |
| 1700025F24Rik               | BY715316                    | gb BY715316 RIKEN full-length enriched, adult male testis Mus musculus cDNA clone 4930512124 5'. [BY715316]                                                    | 0.60                  | 0.022   | 0.450           |
| Gm15688                     | AK035802                    | gb Mus musculus 16 days neonate cerebellum cDNA, RIKEN full-length enriched library, clone:9630005120 product:unclassifiable, full insert sequence. [AK035802] | 0.60                  | 0.013   | 0.412           |
| 4930488B22Rik               | AK015643                    | gb Mus musculus adult male testis cDNA, RIKEN full-length enriched library, clone:4930488B22 product:unclassifiable, full insert sequence. [AK015643]          | 0.60                  | 0.015   | 0.419           |
| chr12:116850878-116855932_R | chr12:116850878-116855932_R | lincRNA:chr12:116850878-116855932 reverse strand                                                                                                               | 0.59                  | 0.004   | 0.308           |
| Try5                        | NM_001003405                | ref Mus musculus trypsin 5 (Try5), mRNA [NM_001003405]                                                                                                         | 0.59                  | 0.045   | 0.513           |
| chr10:92550314-92577555_F   | chr10:92550314-92577555_F   | lincRNA:chr10:92550314-92577555 forward strand                                                                                                                 | 0.59                  | 0.049   | 0.519           |
| chr16:59557120-59602070_F   | chr16:59557120-59602070_F   | lincRNA:chr16:59557120-59602070 forward strand                                                                                                                 | 0.59                  | 0.022   | 0.450           |
| chr1:71939741-71947891_R    | chr1:71939741-71947891_R    | lincRNA:chr1:71939741-71947891 reverse strand                                                                                                                  | 0.59                  | 0.021   | 0.450           |
| 1700102P08Rik               | NM_053216                   | ref Mus musculus RIKEN cDNA 1700102P08 gene (1700102P08Rik), mRNA [NM_053216]                                                                                  | 0.59                  | 0.046   | 0.513           |
| chr2:79517813-79518321_F    | chr2:79517813-79518321_F    | lincRNA:chr2:79517813-79518321 forward strand                                                                                                                  | 0.59                  | 0.038   | 0.499           |
| Timd2                       | NM_001161355                | ref Mus musculus T-cell immunoglobulin and mucin domain containing 2 (Timd2), transcript variant 1, mRNA [NM_001161355]                                        | 0.59                  | 0.037   | 0.498           |
| chr13:64018565-64082570_F   | chr13:64018565-64082570_F   | lincRNA:chr13:64018565-64082570 forward strand                                                                                                                 | 0.59                  | 0.026   | 0.470           |
| chr18:77965011-77972761_F   | chr18:77965011-77972761_F   | lincRNA:chr18:77965011-77972761 forward strand                                                                                                                 | 0.59                  | 0.036   | 0.495           |
| chr5:108538417-108550517_R  | chr5:108538417-108550517_R  | lincRNA:chr5:108538417-108550517 reverse strand                                                                                                                | 0.59                  | 0.036   | 0.495           |
| Olf1112                     | NM_146661                   | ref Mus musculus olfactory receptor 1112 (Olf1112), mRNA [NM_146661]                                                                                           | 0.59                  | 0.030   | 0.477           |

Online Supplemental Table IV: mG4H-STZ Only

| Gene Symbol                 | RefSeq                      | Description                                                                                            | logFC<br>mG4H-<br>STZ | P-value | Adj.<br>P-value |
|-----------------------------|-----------------------------|--------------------------------------------------------------------------------------------------------|-----------------------|---------|-----------------|
| 2300002M23Rik               | NM_175148                   | ref  Mus musculus RIKEN cDNA 2300002M23 gene (2300002M23Rik), mRNA [NM_175148]                         | 0.59                  | 0.011   | 0.406           |
| chr5:107504871-107507830_F  | chr5:107504871-107507830_F  | lincRNA:chr5:107504871-107507830 forward strand                                                        | 0.59                  | 0.019   | 0.439           |
| Tagap1                      | NM_147155                   | ref  Mus musculus T-cell activation GTPase activating protein 1 (Tagap1), mRNA [NM_147155]             | 0.59                  | 0.004   | 0.330           |
| C030044M21Rik               | XM_001476739                | ref  PREDICTED: Mus musculus RIKEN cDNA C030044M21 gene (C030044M21Rik), mRNA [XM_001476739]           | 0.59                  | 0.016   | 0.426           |
| chr15:102100397-102105872_R | chr15:102100397-102105872_R | lincRNA:chr15:102100397-102105872 reverse strand                                                       | 0.59                  | 0.027   | 0.471           |
| chr11:87841800-87858725_F   | chr11:87841800-87858725_F   | lincRNA:chr11:87841800-87858725 forward strand                                                         | 0.58                  | 0.031   | 0.483           |
| chr1:42689799-42749799_R    | chr1:42689799-42749799_R    | lincRNA:chr1:42689799-42749799 reverse strand                                                          | 0.58                  | 0.017   | 0.435           |
| Gm10471                     | NM_001177579                | ref  Mus musculus predicted gene 10471 (Gm10471), mRNA [NM_001177579]                                  | 0.58                  | 0.011   | 0.406           |
| chr1:162933979-162944379_F  | chr1:162933979-162944379_F  | lincRNA:chr1:162933979-162944379 forward strand                                                        | 0.58                  | 0.036   | 0.496           |
| LOC634148                   | XM_908790                   | ref  PREDICTED: Mus musculus similar to beta-1,3-galactosyltransferase-6 (LOC634148), mRNA [XM_908790] | 0.58                  | 0.007   | 0.377           |
| 1700029H14Rik               | NM_025601                   | ref  Mus musculus RIKEN cDNA 1700029H14 gene (1700029H14Rik), transcript variant 1, mRNA [NM_025601]   | 0.58                  | 0.011   | 0.406           |
| chr2:25774411-25783736_F    | chr2:25774411-25783736_F    | lincRNA:chr2:25774411-25783736 forward strand                                                          | 0.58                  | 0.017   | 0.434           |
| Npnt                        | NM_033525                   | ref  Mus musculus nephronectin (Npnt), transcript variant 1, mRNA [NM_033525]                          | 0.58                  | 0.009   | 0.398           |
| chrX:123303474-123305531_F  | chrX:123303474-123305531_F  | lincRNA:chrX:123303474-123305531 forward strand                                                        | 0.58                  | 0.047   | 0.516           |
| LOC639920                   | XM_916550                   | ref  PREDICTED: Mus musculus hypothetical LOC639920 (LOC639920), mRNA [XM_916550]                      | 0.58                  | 0.026   | 0.471           |
| 4930570E03Rik               | XM_001472659                | ref  PREDICTED: Mus musculus RIKEN cDNA 4930570E03 gene (4930570E03Rik), mRNA [XM_001472659]           | 0.58                  | 0.013   | 0.412           |
| Sik3                        | NM_027498                   | ref  Mus musculus SIK family kinase 3 (Sik3), mRNA [NM_027498]                                         | 0.58                  | 0.047   | 0.514           |
| chr5:92548501-92566401_R    | chr5:92548501-92566401_R    | lincRNA:chr5:92548501-92566401 reverse strand                                                          | 0.58                  | 0.017   | 0.434           |
| Krt23                       | NM_033373                   | ref  Mus musculus keratin 23 (Krt23), mRNA [NM_033373]                                                 | 0.58                  | 0.011   | 0.407           |
| 6430704M03Rik               | NM_001142965                | ref  Mus musculus RIKEN cDNA 6430704M03 gene (6430704M03Rik), mRNA [NM_001142965]                      | 0.57                  | 0.034   | 0.493           |
| Cyp3a11                     | NM_007818                   | ref  Mus musculus cytochrome P450, family 3, subfamily a, polypeptide 11 (Cyp3a11), mRNA [NM_007818]   | 0.57                  | 0.031   | 0.482           |
| Heatr7b2                    | NM_001166066                | ref  Mus musculus XVHEAT repeat family member 7B2 (Heatr7b2), mRNA [NM_001166066]                      | 0.57                  | 0.044   | 0.513           |
| chr18:63355660-63369610_R   | chr18:63355660-63369610_R   | lincRNA:chr18:63355660-63369610 reverse strand                                                         | 0.57                  | 0.027   | 0.472           |
| chrX:50087925-50101700_R    | chrX:50087925-50101700_R    | lincRNA:chrX:50087925-50101700 reverse strand                                                          | 0.57                  | 0.045   | 0.513           |
| chr9:65376063-65390480_R    | chr9:65376063-65390480_R    | lincRNA:chr9:65376063-65390480 reverse strand                                                          | 0.57                  | 0.002   | 0.263           |
| Tnrc18                      | NM_178242                   | ref  Mus musculus trinucleotide repeat containing 18 (Tnrc18), transcript variant B, mRNA [NM_178242]  | 0.57                  | 0.023   | 0.453           |
| A330068G13Rik               | XR_002354                   | ref  PREDICTED: Mus musculus RIKEN cDNA A330068G13 gene (A330068G13Rik), misc RNA [XR_002354]          | 0.57                  | 0.036   | 0.495           |
| Nell1                       | NM_001037906                | ref  Mus musculus NEL-like 1 (chicken) (Nell1), mRNA [NM_001037906]                                    | 0.57                  | 0.015   | 0.421           |

| Online Supplemental Table IV: mG4H-STZ Only |                            |                                                                                                                                                              |                       |         |                 |
|---------------------------------------------|----------------------------|--------------------------------------------------------------------------------------------------------------------------------------------------------------|-----------------------|---------|-----------------|
| Gene Symbol                                 | RefSeq                     | Description                                                                                                                                                  | logFC<br>mG4H-<br>STZ | P-value | Adj.<br>P-value |
| ENSMUST00000069573                          | ENSMUST00000069573         | ens  RIKEN cDNA 1700034H15 gene Gene [Source:MGI Symbol;Acc:MGI:1921515] [ENSMUST00000069573]                                                                | 0.57                  | 0.026   | 0.470           |
| Gm6040                                      | NM_001025353               | ref  Mus musculus predicted gene 6040 (Gm6040), mRNA [NM_001025353]                                                                                          | 0.57                  | 0.004   | 0.315           |
| chr9:96664617-96683617_F                    | chr9:96664617-96683617_F   | lincRNA:chr9:96664617-96683617 forward strand                                                                                                                | 0.57                  | 0.036   | 0.495           |
| 4833442J19Rik                               | NM_177101                  | ref  Mus musculus RIKEN cDNA 4833442J19 gene (4833442J19Rik), mRNA [NM_177101]                                                                               | 0.57                  | 0.048   | 0.516           |
| chr19:27448093-27462793_R                   | chr19:27448093-27462793_R  | lincRNA:chr19:27448093-27462793 reverse strand                                                                                                               | 0.57                  | 0.018   | 0.435           |
| Isx                                         | NM_027837                  | ref  Mus musculus intestine specific homeobox (Isx), mRNA [NM_027837]                                                                                        | 0.57                  | 0.007   | 0.377           |
| B4galnt2                                    | NM_008081                  | ref  Mus musculus beta-1,4-N-acetyl-galactosaminyl transferase 2 (B4galnt2), mRNA [NM_008081]                                                                | 0.56                  | 0.006   | 0.369           |
| chr7:66570691-66573827_R                    | chr7:66570691-66573827_R   | lincRNA:chr7:66570691-66573827 reverse strand                                                                                                                | 0.56                  | 0.012   | 0.410           |
| Olfr382                                     | NM_146443                  | ref  Mus musculus olfactory receptor 382 (Olfr382), mRNA [NM_146443]                                                                                         | 0.56                  | 0.009   | 0.397           |
| Foxb1                                       | NM_022378                  | ref  Mus musculus forkhead box B1 (Foxb1), mRNA [NM_022378]                                                                                                  | 0.56                  | 0.021   | 0.448           |
| A630095N17Rik                               | XM_001472088               | ref  PREDICTED: Mus musculus RIKEN cDNA A630095N17 gene (A630095N17Rik), mRNA [XM_001472088]                                                                 | 0.56                  | 0.031   | 0.480           |
| chr3:117935228-118089771_F                  | chr3:117935228-118089771_F | lincRNA:chr3:117935228-118089771 forward strand                                                                                                              | 0.56                  | 0.006   | 0.369           |
| 9330111N05Rik                               | AK033894                   | gb  Mus musculus adult male diencephalon cDNA, RIKEN full-length enriched library, clone:9330111N05 product:unclassifiable, full insert sequence. [AK033894] | 0.56                  | 0.031   | 0.480           |
| D16Ertd6e                                   | C76316                     | gb  C76316 Mouse 3.5-dpc blastocyst cDNA Mus musculus cDNA clone J0008E12 3'. [C76316]                                                                       | 0.56                  | 0.009   | 0.398           |
| Bcmo1                                       | NM_021486                  | ref  Mus musculus beta-carotene 15,15'-monooxygenase (Bcmo1), transcript variant 1, mRNA [NM_021486]                                                         | 0.56                  | 0.043   | 0.510           |
| chr8:44232164-44267061_F                    | chr8:44232164-44267061_F   | lincRNA:chr8:44232164-44267061 forward strand                                                                                                                | 0.56                  | 0.035   | 0.495           |
| chr8:34627209-34667814_F                    | chr8:34627209-34667814_F   | lincRNA:chr8:34627209-34667814 forward strand                                                                                                                | 0.56                  | 0.033   | 0.490           |
| 4930529K09Rik                               | AK015937                   | gb  Mus musculus adult male testis cDNA, RIKEN full-length enriched library, clone:4930529K09 product:unclassifiable, full insert sequence. [AK015937]       | 0.56                  | 0.018   | 0.437           |
| Cnot2                                       | NM_001037848               | ref  Mus musculus CCR4-NOT transcription complex, subunit 2 (Cnot2), transcript variant 4, mRNA [NM_001037848]                                               | 0.56                  | 0.025   | 0.464           |
| chr16:4585697-4594022_F                     | chr16:4585697-4594022_F    | lincRNA:chr16:4585697-4594022 forward strand                                                                                                                 | 0.56                  | 0.022   | 0.451           |
| chr2:45132558-45136718_F                    | chr2:45132558-45136718_F   | lincRNA:chr2:45132558-45136718 forward strand                                                                                                                | 0.56                  | 0.007   | 0.383           |
| chr7:134779841-134840591_F                  | chr7:134779841-134840591_F | lincRNA:chr7:134779841-134840591 forward strand                                                                                                              | 0.56                  | 0.034   | 0.491           |
| chr5:30550467-30559008_F                    | chr5:30550467-30559008_F   | lincRNA:chr5:30550467-30559008 forward strand                                                                                                                | 0.56                  | 0.006   | 0.369           |
| chr2:31001736-31006911_F                    | chr2:31001736-31006911_F   | lincRNA:chr2:31001736-31006911 forward strand                                                                                                                | 0.56                  | 0.037   | 0.496           |
| ENSMUST00000099300                          | ENSMUST00000099300         | ens  Putative uncharacterized protein [Source:UniProtKB/TrEMBL;Acc:Q3TZ19] [ENSMUST00000099300]                                                              | 0.56                  | 0.028   | 0.476           |
| 4933404K08Rik                               | AK016652                   | gb  Mus musculus adult male testis cDNA, RIKEN full-length enriched library, clone:4933404K08 product:unclassifiable, full insert sequence. [AK016652]       | 0.56                  | 0.039   | 0.500           |



Online Supplemental Table IV: mG4H-STZ Only

| Gene Symbol                 | RefSeq                      | Description                                                                                                                        | logFC<br>mG4H-<br>STZ | P-value | Adj.<br>P-value |
|-----------------------------|-----------------------------|------------------------------------------------------------------------------------------------------------------------------------|-----------------------|---------|-----------------|
| Gm10768                     | NR_033472                   | ref  Mus musculus predicted gene 10768 (Gm10768), non-coding RNA [NR_033472]                                                       | 0.56                  | 0.027   | 0.473           |
| 4930555G01Rik               | NM_175393                   | ref  Mus musculus RIKEN cDNA 4930555G01 gene (4930555G01Rik), mRNA [NM_175393]                                                     | 0.56                  | 0.012   | 0.409           |
| Pcdh8                       | NM_021543                   | ref  Mus musculus protocadherin 8 (Pcdh8), transcript variant 1, mRNA [NM_021543]                                                  | 0.55                  | 0.012   | 0.408           |
| Olfr600                     | NM_147046                   | ref  Mus musculus olfactory receptor 600 (Olfr600), mRNA [NM_147046]                                                               | 0.55                  | 0.021   | 0.447           |
| chr5:143196275-143207575_F  | chr5:143196275-143207575_F  | lincRNA:chr5:143196275-143207575 forward strand                                                                                    | 0.55                  | 0.000   | 0.154           |
| Mtap7                       | NM_008635                   | ref  Mus musculus microtubule-associated protein 7 (Mtap7), mRNA [NM_008635]                                                       | 0.55                  | 0.033   | 0.487           |
| ENSMUST00000052291          | ENSMUST00000052291          | ens  Putative uncharacterized protein Fragment [Source:UniProtKB/TrEMBL;Acc:Q8CEY4] [ENSMUST00000052291]                           | 0.55                  | 0.031   | 0.482           |
| chr4:11049325-11072075_R    | chr4:11049325-11072075_R    | lincRNA:chr4:11049325-11072075 reverse strand                                                                                      | 0.55                  | 0.022   | 0.451           |
| Rfx2                        | NM_009056                   | ref  Mus musculus regulatory factor X, 2 (influences HLA class II expression) (Rfx2), transcript variant 2, mRNA [NM_009056]       | 0.55                  | 0.022   | 0.450           |
| Tmem41a                     | NM_025693                   | ref  Mus musculus transmembrane protein 41a (Tmem41a), mRNA [NM_025693]                                                            | 0.55                  | 0.017   | 0.434           |
| chr8:94841965-94881130_R    | chr8:94841965-94881130_R    | lincRNA:chr8:94841965-94881130 reverse strand                                                                                      | 0.55                  | 0.012   | 0.412           |
| LOC100047811                | XM_001478912                | ref  PREDICTED: Mus musculus similar to Y25C1A.3 (LOC100047811), mRNA [XM_001478912]                                               | 0.55                  | 0.018   | 0.437           |
| Vmn2r-ps122                 | XM_892296                   | ref  PREDICTED: Mus musculus predicted gene, EG627618 (EG627618), mRNA [XM_892296]                                                 | 0.55                  | 0.020   | 0.445           |
| Baiap2                      | NM_001037755                | ref  Mus musculus brain-specific angiogenesis inhibitor 1-associated protein 2 (Baiap2), transcript variant 1, mRNA [NM_001037755] | 0.55                  | 0.035   | 0.493           |
| Olfr398                     | NM_146710                   | ref  Mus musculus olfactory receptor 398 (Olfr398), mRNA [NM_146710]                                                               | 0.55                  | 0.022   | 0.450           |
| Olfr601                     | NM_146314                   | ref  Mus musculus olfactory receptor 601 (Olfr601), mRNA [NM_146314]                                                               | 0.55                  | 0.043   | 0.511           |
| Vmn2r65                     | NM_001105180                | ref  Mus musculus vomeronasal 2, receptor 65 (Vmn2r65), mRNA [NM_001105180]                                                        | 0.55                  | 0.025   | 0.464           |
| chr11:102878974-102888924_R | chr11:102878974-102888924_R | lincRNA:chr11:102878974-102888924 reverse strand                                                                                   | 0.55                  | 0.010   | 0.401           |
| ENSMUST00000112129          | ENSMUST00000112129          | ens  Rho GTPase activating protein 6 Gene [Source:MGI (curated);Acc:MGI:1196332] [ENSMUST00000112129]                              | 0.55                  | 0.009   | 0.393           |
| BC049349                    | NM_001164581                | ref  Mus musculus cDNA sequence BC049349 (BC049349), mRNA [NM_001164581]                                                           | 0.55                  | 0.002   | 0.281           |
| ENSMUST00000103318          | ENSMUST00000103318          | gb  Mus musculus clone H1 monoclonal autoantibody light chain variable region mRNA, partial cds. [EU568236]                        | 0.55                  | 0.007   | 0.384           |
| chr16:86770170-86874921_R   | chr16:86770170-86874921_R   | lincRNA:chr16:86770170-86874921 reverse strand                                                                                     | 0.55                  | 0.048   | 0.516           |
| Il28b                       | NM_177396                   | ref  Mus musculus interleukin 28B (Il28b), mRNA [NM_177396]                                                                        | 0.55                  | 0.002   | 0.271           |
| chr6:35441848-35450830_R    | chr6:35441848-35450830_R    | lincRNA:chr6:35441848-35450830 reverse strand                                                                                      | 0.55                  | 0.020   | 0.443           |
| Olfr1136                    | NM_146659                   | ref  Mus musculus olfactory receptor 1136 (Olfr1136), mRNA [NM_146659]                                                             | 0.55                  | 0.032   | 0.483           |
| AU020147                    | BG069650                    | gb  H3078F05-3 NIA Mouse 15K cDNA Clone Set Mus musculus cDNA clone H3078F05 3', mRNA sequence [BG069650]                          | 0.55                  | 0.037   | 0.498           |

| Online Supplemental Table IV: mG4H-STZ Only |                             |                                                                                                     |                       |         |                 |
|---------------------------------------------|-----------------------------|-----------------------------------------------------------------------------------------------------|-----------------------|---------|-----------------|
| Gene Symbol                                 | RefSeq                      | Description                                                                                         | logFC<br>mG4H-<br>STZ | P-value | Adj.<br>P-value |
| Gpr81                                       | NM_175520                   | ref  Mus musculus G protein-coupled receptor 81 (Gpr81), mRNA [NM_175520]                           | 0.55                  | 0.018   | 0.436           |
| Tmem28                                      | ENSMUST00000096363          | ens transmembrane protein 28 Gene [Source:MGI (curated);Acc:MGI:3648377] [ENSMUST00000096363]       | 0.54                  | 0.009   | 0.397           |
| ENSMUST00000101522                          | ENSMUST00000101522          | ens Putative uncharacterized protein [Source:UniProtKB/TrEMBL;Acc:Q3UTW8] [ENSMUST00000101522]      | 0.54                  | 0.046   | 0.513           |
| Syn2                                        | NM_001111015                | ref  Mus musculus synapsin II (Syn2), transcript variant IIa, mRNA [NM_001111015]                   | 0.54                  | 0.012   | 0.408           |
| Nlgn1                                       | NM_138666                   | ref  Mus musculus neuroligin 1 (Nlgn1), transcript variant 1, mRNA [NM_138666]                      | 0.54                  | 0.022   | 0.452           |
| Hsd17b2                                     | NM_008290                   | ref  Mus musculus hydroxysteroid (17-beta) dehydrogenase 2 (Hsd17b2), mRNA [NM_008290]              | 0.54                  | 0.024   | 0.460           |
| Gm14137                                     | NM_001039223                | ref  Mus musculus predicted gene 14137 (Gm14137), mRNA [NM_001039223]                               | 0.54                  | 0.018   | 0.437           |
| chrX:120812236-121038407_R                  | chrX:120812236-121038407_R  | lincRNA:chrX:120812236-121038407 reverse strand                                                     | 0.54                  | 0.034   | 0.491           |
| LOC100048762                                | XM_001481197                | ref  PREDICTED: Mus musculus similar to lymphocyte antigen-49D1 (LOC100048762), mRNA [XM_001481197] | 0.54                  | 0.011   | 0.407           |
| Gm5222                                      | XM_908097                   | ref  PREDICTED: Mus musculus hypothetical LOC383196 (LOC383196), mRNA [XM_908097]                   | 0.54                  | 0.015   | 0.423           |
| chr9:39982939-39992189_F                    | chr9:39982939-39992189_F    | lincRNA:chr9:39982939-39992189 forward strand                                                       | 0.54                  | 0.022   | 0.453           |
| Gm8781                                      | XM_001001937                | ref  PREDICTED: Mus musculus predicted gene, EG667720 (EG667720), mRNA [XM_001001937]               | 0.54                  | 0.032   | 0.484           |
| Olf561                                      | NM_147092                   | ref  Mus musculus olfactory receptor 561 (Olf561), mRNA [NM_147092]                                 | 0.54                  | 0.039   | 0.501           |
| Cndp1                                       | NM_177450                   | ref  Mus musculus carnosine dipeptidase 1 (metallopeptidase M20 family) (Cndp1), mRNA [NM_177450]   | 0.54                  | 0.036   | 0.495           |
| LOC100048218                                | XM_001479770                | ref  PREDICTED: Mus musculus similar to EAT2b (LOC100048218), mRNA [XM_001479770]                   | 0.54                  | 0.003   | 0.305           |
| Ugt2b34                                     | NM_153598                   | ref  Mus musculus UDP glucuronosyltransferase 2 family, polypeptide B34 (Ugt2b34), mRNA [NM_153598] | 0.54                  | 0.041   | 0.507           |
| Nrf1                                        | NM_010938                   | ref  Mus musculus nuclear respiratory factor 1 (Nrf1), transcript variant 6, mRNA [NM_010938]       | 0.53                  | 0.037   | 0.497           |
| Gm6732                                      | XM_891766                   | ref  PREDICTED: Mus musculus predicted gene, EG627108 (EG627108), mRNA [XM_891766]                  | 0.53                  | 0.026   | 0.470           |
| chr1:52706748-52712402_R                    | chr1:52706748-52712402_R    | lincRNA:chr1:52706748-52712402 reverse strand                                                       | 0.53                  | 0.020   | 0.442           |
| Ms4a14                                      | ENSMUST00000067600          | ref  PREDICTED: Mus musculus gene model 1276, (NCBI) (Gm1276), mRNA [XM_357051]                     | 0.53                  | 0.018   | 0.437           |
| chr7:133402766-133415516_R                  | chr7:133402766-133415516_R  | lincRNA:chr7:133402766-133415516 reverse strand                                                     | 0.53                  | 0.003   | 0.303           |
| chr12:116850878-116855932_R                 | chr12:116850878-116855932_R | lincRNA:chr12:116850878-116855932 reverse strand                                                    | 0.53                  | 0.022   | 0.452           |
| chr14:76237150-76237464_R                   | chr14:76237150-76237464_R   | lincRNA:chr14:76237150-76237464 reverse strand                                                      | 0.53                  | 0.018   | 0.435           |
| Rora                                        | NM_013646                   | ref  Mus musculus RAR-related orphan receptor alpha (Rora), mRNA [NM_013646]                        | 0.53                  | 0.046   | 0.513           |
| Tmem132d                                    | NM_172885                   | ref  Mus musculus transmembrane protein 132D (Tmem132d), mRNA [NM_172885]                           | 0.53                  | 0.014   | 0.418           |
| chr2:94008913-94019798_R                    | chr2:94008913-94019798_R    | lincRNA:chr2:94008913-94019798 reverse strand                                                       | 0.53                  | 0.030   | 0.477           |
| chr3:26975624-26988699_F                    | chr3:26975624-26988699_F    | lincRNA:chr3:26975624-26988699 forward strand                                                       | 0.53                  | 0.014   | 0.418           |

| Online Supplemental Table IV: mG4H-STZ Only |                            |                                                                                                                                                                                                                            |                       |         |                 |
|---------------------------------------------|----------------------------|----------------------------------------------------------------------------------------------------------------------------------------------------------------------------------------------------------------------------|-----------------------|---------|-----------------|
| Gene Symbol                                 | RefSeq                     | Description                                                                                                                                                                                                                | logFC<br>mG4H-<br>STZ | P-value | Adj.<br>P-value |
| Gm4791                                      | XM_001479577               | ref PREDICTED: Mus musculus hypothetical protein D930036J05 (D930036J05), mRNA [XM_001479577]                                                                                                                              | 0.53                  | 0.027   | 0.472           |
| chr18:5119300-5181600_F                     | chr18:5119300-5181600_F    | lincRNA:chr18:5119300-5181600 forward strand                                                                                                                                                                               | 0.53                  | 0.032   | 0.483           |
| Cyp26c1                                     | NM_001105201               | ref Mus musculus cytochrome P450, family 26, subfamily c, polypeptide 1 (Cyp26c1), mRNA [NM_001105201]                                                                                                                     | 0.53                  | 0.042   | 0.508           |
| ENSMUST00000119485                          | ENSMUST00000119485         | ens retinol dehydrogenase 13 (all-trans and 9-cis) Gene [Source:MGI (curated);Acc:MGI:1918732] [ENSMUST00000119485]                                                                                                        | 0.53                  | 0.029   | 0.477           |
| chr10:94900849-94928059_F                   | chr10:94900849-94928059_F  | lincRNA:chr10:94900849-94928059 forward strand                                                                                                                                                                             | 0.53                  | 0.007   | 0.377           |
| chr7:66926500-66952100_F                    | chr7:66926500-66952100_F   | lincRNA:chr7:66926500-66952100 forward strand                                                                                                                                                                              | 0.53                  | 0.018   | 0.435           |
| chr2:164739589-164745000_F                  | chr2:164739589-164745000_F | lincRNA:chr2:164739589-164745000 forward strand                                                                                                                                                                            | 0.53                  | 0.022   | 0.453           |
| Mtap7                                       | NM_008635                  | ref Mus musculus microtubule-associated protein 7 (Mtap7), mRNA [NM_008635]                                                                                                                                                | 0.52                  | 0.048   | 0.517           |
| Gm10375                                     | NM_001098269               | ref Mus musculus predicted gene 10375 (Gm10375), mRNA [NM_001098269]                                                                                                                                                       | 0.52                  | 0.028   | 0.474           |
| chr11:33414450-33450750_F                   | chr11:33414450-33450750_F  | lincRNA:chr11:33414450-33450750 forward strand                                                                                                                                                                             | 0.52                  | 0.028   | 0.476           |
| chr6:146495264-146495602_R                  | chr6:146495264-146495602_R | lincRNA:chr6:146495264-146495602 reverse strand                                                                                                                                                                            | 0.52                  | 0.017   | 0.429           |
| 4932436B18                                  | AK030081                   | gb Mus musculus adult male testis cDNA, RIKEN full-length enriched library, clone:4932436B18 product:similar to PMS1 PROTEIN HOMOLOG 1 (DNA MISMATCH REPAIR PROTEIN PMS1) [Homo sapiens], full insert sequence. [AK030081] | 0.52                  | 0.044   | 0.512           |
| Olfr430                                     | NM_146718                  | ref Mus musculus olfactory receptor 430 (Olfr430), mRNA [NM_146718]                                                                                                                                                        | 0.52                  | 0.012   | 0.410           |
| Atp8a2                                      | NM_015803                  | ref Mus musculus ATPase, aminophospholipid transporter-like, class I, type 8A, member 2 (Atp8a2), mRNA [NM_015803]                                                                                                         | 0.52                  | 0.023   | 0.454           |
| Fbxo2                                       | NM_176848                  | ref Mus musculus F-box protein 2 (Fbxo2), mRNA [NM_176848]                                                                                                                                                                 | 0.52                  | 0.007   | 0.383           |
| Dmc1                                        | NM_010059                  | ref Mus musculus DMC1 dosage suppressor of mck1 homolog, meiosis-specific homologous recombination (yeast) (Dmc1), mRNA [NM_010059]                                                                                        | 0.52                  | 0.025   | 0.465           |
| AK148615                                    | AK148615                   | gb Mus musculus 2 days neonate sympathetic ganglion cDNA, RIKEN full-length enriched library, clone:7120423E20 product:hypothetical protein, full insert sequence. [AK148615]                                              | 0.52                  | 0.042   | 0.507           |
| KCNQ1ot1                                    | KCNQ1ot1                   | lincRNA:chr7:150399015-150482452 forward strand                                                                                                                                                                            | 0.52                  | 0.034   | 0.493           |
| Gm156                                       | NM_001014997               | ref Mus musculus predicted gene 156 (Gm156), mRNA [NM_001014997]                                                                                                                                                           | 0.52                  | 0.044   | 0.513           |
| Ppp2r3a                                     | NM_001161362               | ref Mus musculus protein phosphatase 2, regulatory subunit B", alpha (Ppp2r3a), transcript variant 1, mRNA [NM_001161362]                                                                                                  | 0.52                  | 0.026   | 0.470           |
| chr16:9249688-9275013_R                     | chr16:9249688-9275013_R    | lincRNA:chr16:9249688-9275013 reverse strand                                                                                                                                                                               | 0.52                  | 0.020   | 0.443           |
| Col2a1                                      | NM_001113515               | ref Mus musculus collagen, type II, alpha 1 (Col2a1), transcript variant 2, mRNA [NM_001113515]                                                                                                                            | 0.52                  | 0.028   | 0.474           |
| Hipk1                                       | NM_010432                  | ref Mus musculus homeodomain interacting protein kinase 1 (Hipk1), mRNA [NM_010432]                                                                                                                                        | 0.52                  | 0.043   | 0.509           |
| Gm12876                                     | XM_907655                  | ref PREDICTED: Mus musculus similar to AUMP (LOC633279), mRNA [XM_907655]                                                                                                                                                  | 0.52                  | 0.045   | 0.513           |

| Online Supplemental Table IV: mG4H-STZ Only |                            |                                                                                                                     |                       |         |                 |
|---------------------------------------------|----------------------------|---------------------------------------------------------------------------------------------------------------------|-----------------------|---------|-----------------|
| Gene Symbol                                 | RefSeq                     | Description                                                                                                         | logFC<br>mG4H-<br>STZ | P-value | Adj.<br>P-value |
| chr5:37051650-37110575_R                    | chr5:37051650-37110575_R   | lincRNA:chr5:37051650-37110575 reverse strand                                                                       | 0.52                  | 0.020   | 0.445           |
| chr17:13220550-13236900_F                   | chr17:13220550-13236900_F  | lincRNA:chr17:13220550-13236900 forward strand                                                                      | 0.52                  | 0.033   | 0.487           |
| chr5:110097500-110118475_F                  | chr5:110097500-110118475_F | lincRNA:chr5:110097500-110118475 forward strand                                                                     | 0.52                  | 0.012   | 0.409           |
| Olfr1424                                    | NM_146681                  | ref Mus musculus olfactory receptor 1424 (Olfr1424), mRNA [NM_146681]                                               | 0.52                  | 0.048   | 0.516           |
| Olfr860                                     | NM_146528                  | ref Mus musculus olfactory receptor 860 (Olfr860), mRNA [NM_146528]                                                 | 0.52                  | 0.044   | 0.511           |
| Rrh                                         | NM_009102                  | ref Mus musculus retinal pigment epithelium derived rhodopsin homolog (Rrh), mRNA [NM_009102]                       | 0.52                  | 0.029   | 0.477           |
| 5430417L22Rik                               | NR_030716                  | ref Mus musculus RIKEN cDNA 5430417L22 gene (5430417L22Rik), non-coding RNA [NR_030716]                             | 0.52                  | 0.002   | 0.262           |
| Olfr1148                                    | NM_001011519               | ref Mus musculus olfactory receptor 1148 (Olfr1148), mRNA [NM_001011519]                                            | 0.51                  | 0.028   | 0.475           |
| chr4:101010948-101032148_F                  | chr4:101010948-101032148_F | lincRNA:chr4:101010948-101032148 forward strand                                                                     | 0.51                  | 0.041   | 0.506           |
| Gm5827                                      | XR_033677                  | ref PREDICTED: Mus musculus similar to Rev-Erb-beta (LOC545289), misc RNA [XR_033677]                               | 0.51                  | 0.013   | 0.412           |
| chr4:115577276-115577566_F                  | chr4:115577276-115577566_F | lincRNA:chr4:115577276-115577566 forward strand                                                                     | 0.51                  | 0.006   | 0.369           |
| Itgbl1                                      | NM_145467                  | ref Mus musculus integrin, beta-like 1 (Itgbl1), mRNA [NM_145467]                                                   | 0.51                  | 0.010   | 0.401           |
| ENSMUST00000103276                          | ENSMUST00000103276         | ens T-cell receptor beta chain V region LB2 Precursor [Source:UniProtKB/Swiss-Prot;Acc:P04212] [ENSMUST00000103276] | 0.51                  | 0.012   | 0.408           |
| chr7:144563845-144603732_F                  | chr7:144563845-144603732_F | lincRNA:chr7:144563845-144603732 forward strand                                                                     | 0.51                  | 0.026   | 0.468           |
| chrX:120819096-120820227_R                  | chrX:120819096-120820227_R | lincRNA:chrX:120819096-120820227 reverse strand                                                                     | 0.51                  | 0.020   | 0.443           |
| 4930502E18Rik                               | NM_029142                  | ref Mus musculus RIKEN cDNA 4930502E18 gene (4930502E18Rik), mRNA [NM_029142]                                       | 0.51                  | 0.009   | 0.398           |
| Olfr652                                     | NM_147048                  | ref Mus musculus olfactory receptor 652 (Olfr652), mRNA [NM_147048]                                                 | 0.51                  | 0.030   | 0.477           |
| chr17:31694070-31696057_F                   | chr17:31694070-31696057_F  | lincRNA:chr17:31694070-31696057 forward strand                                                                      | 0.51                  | 0.029   | 0.477           |
| ENSMUST00000111353                          | ENSMUST00000111353         | ens hydroxysteroid (17-beta) dehydrogenase 7 Gene [Source:MGI (curated);Acc:MGI:1330808] [ENSMUST00000111353]       | 0.51                  | 0.027   | 0.472           |
| Gm8903                                      | XM_987891                  | ref PREDICTED: Mus musculus predicted gene, EG667970 (EG667970), mRNA [XM_987891]                                   | 0.51                  | 0.045   | 0.513           |
| chr9:88336331-88336978_R                    | chr9:88336331-88336978_R   | lincRNA:chr9:88336331-88336978 reverse strand                                                                       | 0.51                  | 0.010   | 0.400           |
| Skor1                                       | NM_172446                  | ref Mus musculus SKI family transcriptional corepressor 1 (Skor1), transcript variant 1, mRNA [NM_172446]           | 0.51                  | 0.047   | 0.515           |
| chr11:70196232-70203307_F                   | chr11:70196232-70203307_F  | lincRNA:chr11:70196232-70203307 forward strand                                                                      | 0.51                  | 0.023   | 0.453           |
| Hsf5                                        | NM_001045527               | ref Mus musculus heat shock transcription factor family member 5 (Hsf5), mRNA [NM_001045527]                        | 0.51                  | 0.049   | 0.519           |
| Gm2942                                      | XM_001475175               | ref PREDICTED: Mus musculus hypothetical protein LOC100040747 (LOC100040747), mRNA [XM_001475175]                   | 0.51                  | 0.012   | 0.410           |
| chr8:123571640-123607481_R                  | chr8:123571640-123607481_R | lincRNA:chr8:123571640-123607481 reverse strand                                                                     | 0.51                  | 0.036   | 0.495           |
| Olfr784                                     | NM_146729                  | ref Mus musculus olfactory receptor 784 (Olfr784), mRNA [NM_146729]                                                 | 0.51                  | 0.030   | 0.480           |

| Online Supplemental Table IV: mG4H-STZ Only |                             |                                                                                                                                                                                                                   |                       |         |                 |
|---------------------------------------------|-----------------------------|-------------------------------------------------------------------------------------------------------------------------------------------------------------------------------------------------------------------|-----------------------|---------|-----------------|
| Gene Symbol                                 | RefSeq                      | Description                                                                                                                                                                                                       | logFC<br>mG4H-<br>STZ | P-value | Adj.<br>P-value |
| Bhlhe22                                     | NM_021560                   | ref  Mus musculus basic helix-loop-helix family, member e22 (Bhlhe22), mRNA [NM_021560]                                                                                                                           | 0.51                  | 0.005   | 0.338           |
| 4933408J17Rik                               | AK016739                    | gb  Mus musculus adult male testis cDNA, RIKEN full-length enriched library, clone:4933408J17 product:hypothetical DHS-like NAD/FAD-binding domain structure containing protein, full insert sequence. [AK016739] | 0.51                  | 0.004   | 0.318           |
| chr3:37606942-37610130_F                    | chr3:37606942-37610130_F    | lincRNA:chr3:37606942-37610130 forward strand                                                                                                                                                                     | 0.51                  | 0.049   | 0.519           |
| ENSMUST00000105292                          | ENSMUST00000105292          | ens  RIKEN cDNA 4930485B16 gene Gene [Source:MGI Symbol;Acc:MGI:1922208] [ENSMUST00000105292]                                                                                                                     | 0.51                  | 0.048   | 0.516           |
| Svil                                        | ENSMUST00000115871          | ens  supervillin Gene [Source:MGI (curated);Acc:MGI:2147319] [ENSMUST00000115871]                                                                                                                                 | 0.51                  | 0.027   | 0.473           |
| LOC641221                                   | XM_001472961                | ref  PREDICTED: Mus musculus similar to H prechain (AA -19 to 98) (LOC641221), mRNA [XM_001472961]                                                                                                                | 0.51                  | 0.008   | 0.391           |
| ENSMUST00000099686                          | ENSMUST00000099686          | ens  Putative uncharacterized protein Fragment [Source:UniProtKB/TrEMBL;Acc:Q3U1Q6] [ENSMUST00000099686]                                                                                                          | 0.51                  | 0.048   | 0.516           |
| chr4:132897264-132910714_R                  | chr4:132897264-132910714_R  | lincRNA:chr4:132897264-132910714 reverse strand                                                                                                                                                                   | 0.51                  | 0.046   | 0.513           |
| Ypel4                                       | NM_001005342                | ref  Mus musculus yippee-like 4 (Drosophila) (Ypel4), mRNA [NM_001005342]                                                                                                                                         | 0.51                  | 0.021   | 0.448           |
| chr6:90745692-90777977_F                    | chr6:90745692-90777977_F    | lincRNA:chr6:90745692-90777977 forward strand                                                                                                                                                                     | 0.51                  | 0.049   | 0.518           |
| chr14:25923295-25923893_F                   | chr14:25923295-25923893_F   | lincRNA:chr14:25923295-25923893 forward strand                                                                                                                                                                    | 0.51                  | 0.047   | 0.515           |
| Arhgap40                                    | NM_001145015                | ref  Mus musculus Rho GTPase activating protein 40 (Arhgap40), mRNA [NM_001145015]                                                                                                                                | 0.50                  | 0.022   | 0.450           |
| chr8:105795290-105864030_F                  | chr8:105795290-105864030_F  | lincRNA:chr8:105795290-105864030 forward strand                                                                                                                                                                   | 0.50                  | 0.046   | 0.513           |
| Sh3bp4                                      | NM_133816                   | ref  Mus musculus SH3-domain binding protein 4 (Sh3bp4), mRNA [NM_133816]                                                                                                                                         | 0.50                  | 0.048   | 0.517           |
| chr14:67585234-67596823_F                   | chr14:67585234-67596823_F   | lincRNA:chr14:67585234-67596823 forward strand                                                                                                                                                                    | 0.50                  | 0.026   | 0.469           |
| Gm13043                                     | NM_001039595                | ref  Mus musculus predicted gene 13043 (Gm13043), mRNA [NM_001039595]                                                                                                                                             | 0.50                  | 0.029   | 0.477           |
| chr16:22718344-22725594_R                   | chr16:22718344-22725594_R   | lincRNA:chr16:22718344-22725594 reverse strand                                                                                                                                                                    | 0.50                  | 0.041   | 0.505           |
| chr5:53931541-53945241_R                    | chr5:53931541-53945241_R    | lincRNA:chr5:53931541-53945241 reverse strand                                                                                                                                                                     | 0.50                  | 0.018   | 0.437           |
| ENSMUST00000113743                          | ENSMUST00000113743          | ens  receptor-interacting serine-threonine kinase 4 Gene [Source:MGI (curated);Acc:MGI:1919638] [ENSMUST00000113743]                                                                                              | 0.50                  | 0.049   | 0.519           |
| Crem                                        | NM_001110851                | ref  Mus musculus cAMP responsive element modulator (Crem), transcript variant 7, mRNA [NM_001110851]                                                                                                             | 0.50                  | 0.035   | 0.495           |
| ENSMUST00000094315                          | ENSMUST00000094315          | ens  Putative uncharacterized protein [Source:UniProtKB/TrEMBL;Acc:Q8CCF3] [ENSMUST00000094315]                                                                                                                   | 0.50                  | 0.037   | 0.497           |
| chr16:13752215-13764390_R                   | chr16:13752215-13764390_R   | lincRNA:chr16:13752215-13764390 reverse strand                                                                                                                                                                    | 0.50                  | 0.010   | 0.406           |
| Olfr160                                     | NM_030553                   | ref  Mus musculus olfactory receptor 160 (Olfr160), mRNA [NM_030553]                                                                                                                                              | 0.50                  | 0.018   | 0.435           |
| Atp6v1b1                                    | NM_134157                   | ref  Mus musculus ATPase, H+ transporting, lysosomal V1 subunit B1 (Atp6v1b1), mRNA [NM_134157]                                                                                                                   | 0.50                  | 0.003   | 0.281           |
| chr10:116814196-116920696_R                 | chr10:116814196-116920696_R | lincRNA:chr10:116814196-116920696 reverse strand                                                                                                                                                                  | 0.50                  | 0.003   | 0.281           |

| Online Supplemental Table IV: mG4H-STZ Only |                             |                                                                                                          |                       |         |                 |
|---------------------------------------------|-----------------------------|----------------------------------------------------------------------------------------------------------|-----------------------|---------|-----------------|
| Gene Symbol                                 | RefSeq                      | Description                                                                                              | logFC<br>mG4H-<br>STZ | P-value | Adj.<br>P-value |
| <b>Olfr936</b>                              | ENSMUST00000082311          | ens olfactory receptor 936 Gene [Source:MGI Symbol;Acc:MGI:3030770] [ENSMUST00000082311]                 | 0.50                  | 0.030   | 0.477           |
| <b>Defa23</b>                               | NM_001012307                | ref Mus musculus defensin, alpha, 23 (Defa23), mRNA [NM_001012307]                                       | 0.50                  | 0.019   | 0.440           |
| <b>chr15:102994998-102995947_R</b>          | chr15:102994998-102995947_R | lincRNA:chr15:102994998-102995947 reverse strand                                                         | 0.50                  | 0.037   | 0.497           |
| <b>6330545A04Rik</b>                        | ENSMUST00000105793          | ens RIKEN cDNA 6330545A04 gene Gene [Source:MGI Symbol;Acc:MGI:1923416] [ENSMUST00000105793]             | 0.50                  | 0.028   | 0.474           |
| <b>Ctsh</b>                                 | NM_007801                   | ref Mus musculus cathepsin H (Ctsh), mRNA [NM_007801]                                                    | 0.50                  | 0.026   | 0.470           |
| <b>chr12:33606225-33638225_R</b>            | chr12:33606225-33638225_R   | lincRNA:chr12:33606225-33638225 reverse strand                                                           | 0.50                  | 0.047   | 0.515           |
| <b>Lhx6</b>                                 | NM_001083125                | ref Mus musculus LIM homeobox protein 6 (Lhx6), transcript variant 2, mRNA [NM_001083125]                | 0.50                  | 0.019   | 0.439           |
| <b>ENSMUST00000098602</b>                   | ENSMUST00000098602          | ens RIKEN cDNA 4932431P20 gene Gene [Source:MGI Symbol;Acc:MGI:2149781] [ENSMUST00000098602]             | 0.50                  | 0.009   | 0.393           |
| <b>chr5:22801058-22939737_F</b>             | chr5:22801058-22939737_F    | lincRNA:chr5:22801058-22939737 forward strand                                                            | 0.49                  | 0.020   | 0.447           |
| <b>chr8:48476637-48492537_F</b>             | chr8:48476637-48492537_F    | lincRNA:chr8:48476637-48492537 forward strand                                                            | 0.49                  | 0.043   | 0.509           |
| <b>Gm2657</b>                               | XM_001476278                | ref PREDICTED: Mus musculus similar to Ac2-210 (LOC100046479), mRNA [XM_001476278]                       | 0.49                  | 0.009   | 0.400           |
| <b>chr18:69923410-69965360_R</b>            | chr18:69923410-69965360_R   | lincRNA:chr18:69923410-69965360 reverse strand                                                           | 0.49                  | 0.041   | 0.507           |
| <b>Gm13298</b>                              | NM_001085530                | ref Mus musculus predicted gene 13298 (Gm13298), mRNA [NM_001085530]                                     | 0.49                  | 0.039   | 0.501           |
| <b>Olfr218</b>                              | NM_001001809                | ref Mus musculus olfactory receptor 218 (Olfr218), mRNA [NM_001001809]                                   | 0.49                  | 0.047   | 0.515           |
| <b>Art3</b>                                 | NM_181728                   | ref Mus musculus ADP-ribosyltransferase 3 (Art3), mRNA [NM_181728]                                       | 0.49                  | 0.029   | 0.477           |
| <b>chr4:8606650-8614031_R</b>               | chr4:8606650-8614031_R      | lincRNA:chr4:8606650-8614031 reverse strand                                                              | 0.49                  | 0.008   | 0.391           |
| <b>chr12:89448550-89461843_R</b>            | chr12:89448550-89461843_R   | lincRNA:chr12:89448550-89461843 reverse strand                                                           | 0.49                  | 0.043   | 0.509           |
| <b>9830001H06Rik</b>                        | NM_001164663                | ref Mus musculus RIKEN cDNA 9830001H06 gene (9830001H06Rik), mRNA [NM_001164663]                         | 0.49                  | 0.011   | 0.407           |
| <b>LOC100048769</b>                         | XM_001481206                | ref PREDICTED: Mus musculus hypothetical protein LOC100048769 (LOC100048769), mRNA [XM_001481206]        | 0.49                  | 0.025   | 0.464           |
| <b>ENSMUST00000101005</b>                   | ENSMUST00000101005          | ens hereditary sensory neuropathy, type II Gene [Source:MGI Symbol;Acc:MGI:3644010] [ENSMUST00000101005] | 0.49                  | 0.028   | 0.476           |
| <b>Lrriq3</b>                               | NM_028938                   | ref Mus musculus leucine-rich repeats and IQ motif containing 3 (Lrriq3), mRNA [NM_028938]               | 0.49                  | 0.036   | 0.495           |
| <b>Cntnap5a</b>                             | NM_001077425                | ref Mus musculus contactin associated protein-like 5A (Cntnap5a), mRNA [NM_001077425]                    | 0.49                  | 0.015   | 0.419           |
| <b>chr11:119794849-119803349_R</b>          | chr11:119794849-119803349_R | lincRNA:chr11:119794849-119803349 reverse strand                                                         | 0.49                  | 0.032   | 0.483           |
| <b>Asb18</b>                                | NM_139152                   | ref Mus musculus ankyrin repeat and SOCS box-containing 18 (Asb18), mRNA [NM_139152]                     | 0.49                  | 0.004   | 0.313           |
| <b>Scn3a</b>                                | NM_018732                   | ref Mus musculus sodium channel, voltage-gated, type III, alpha (Scn3a), mRNA [NM_018732]                | 0.49                  | 0.041   | 0.505           |
| <b>chr5:124667541-124700029_F</b>           | chr5:124667541-124700029_F  | lincRNA:chr5:124667541-124700029 forward strand                                                          | 0.49                  | 0.025   | 0.464           |
| <b>chr7:66574000-66577193_F</b>             | chr7:66574000-66577193_F    | lincRNA:chr7:66574000-66577193 forward strand                                                            | 0.49                  | 0.005   | 0.354           |
| <b>Sik3</b>                                 | NM_027498                   | ref Mus musculus SIK family kinase 3 (Sik3), mRNA [NM_027498]                                            | 0.49                  | 0.049   | 0.518           |



Online Supplemental Table IV: mG4H-STZ Only

| Gene Symbol                 | RefSeq                      | Description                                                                                                                                           | logFC<br>mG4H-<br>STZ | P-value | Adj.<br>P-value |
|-----------------------------|-----------------------------|-------------------------------------------------------------------------------------------------------------------------------------------------------|-----------------------|---------|-----------------|
| chr6:28161665-28189840_F    | chr6:28161665-28189840_F    | lincRNA:chr6:28161665-28189840 forward strand                                                                                                         | 0.49                  | 0.007   | 0.384           |
| Gm2290                      | XM_001473057                | ref PREDICTED: Mus musculus similar to cyclic nucleotide gated channel beta 1 (LOC100039526), mRNA [XM_001473057]                                     | 0.49                  | 0.016   | 0.426           |
| 4930422C21Rik               | AK015175                    | gb Mus musculus adult male testis cDNA, RIKEN full-length enriched library, clone:4930422C21 product:unclassifiable, full insert sequence. [AK015175] | 0.49                  | 0.041   | 0.504           |
| Art3                        | NM_181728                   | ref Mus musculus ADP-ribosyltransferase 3 (Art3), mRNA [NM_181728]                                                                                    | 0.49                  | 0.039   | 0.500           |
| 1700074P13Rik               | NM_028550                   | ref Mus musculus RIKEN cDNA 1700074P13 gene (1700074P13Rik), mRNA [NM_028550]                                                                         | 0.49                  | 0.004   | 0.318           |
| 1700086D15Rik               | ENSIMUST00000020855         | ens RIKEN cDNA 1700086D15 gene Gene [Source:MGI Symbol;Acc:MGI:1921532] [ENSIMUST00000020855]                                                         | 0.49                  | 0.015   | 0.418           |
| Gm13749                     | NR_027824                   | ref Mus musculus predicted gene 13749 (Gm13749), non-coding RNA [NR_027824]                                                                           | 0.49                  | 0.035   | 0.495           |
| chr12:110909258-110913909_F | chr12:110909258-110913909_F | lincRNA:chr12:110909258-110913909 forward strand                                                                                                      | 0.48                  | 0.013   | 0.412           |
| LOC634171                   | ENSIMUST00000103637         | ens TRAV4-2 Fragment [Source:UniProtKB/TrEMBL;Acc:Q5R1E7] [ENSIMUST00000103637]                                                                       | 0.48                  | 0.018   | 0.437           |
| LOC100047343                | XM_001478902                | ref PREDICTED: Mus musculus hypothetical protein LOC100047343 (LOC100047343), mRNA [XM_001478902]                                                     | 0.48                  | 0.003   | 0.290           |
| Gm11680                     | XM_001477895                | ref PREDICTED: Mus musculus hypothetical protein LOC100046870 (LOC100046870), mRNA [XM_001477895]                                                     | 0.48                  | 0.004   | 0.325           |
| chr8:54660858-54661952_R    | chr8:54660858-54661952_R    | lincRNA:chr8:54660858-54661952 reverse strand                                                                                                         | 0.48                  | 0.039   | 0.501           |
| Vmn2r3                      | NM_001104614                | ref Mus musculus vomeronasal 2, receptor 3 (Vmn2r3), mRNA [NM_001104614]                                                                              | 0.48                  | 0.023   | 0.455           |
| Mageb16                     | NM_028025                   | ref Mus musculus melanoma antigen family B, 16 (Mageb16), transcript variant 1, mRNA [NM_028025]                                                      | 0.48                  | 0.016   | 0.426           |
| chr6:126506134-126506913_R  | chr6:126506134-126506913_R  | lincRNA:chr6:126506134-126506913 reverse strand                                                                                                       | 0.48                  | 0.042   | 0.507           |
| chr14:76912477-76931702_F   | chr14:76912477-76931702_F   | lincRNA:chr14:76912477-76931702 forward strand                                                                                                        | 0.48                  | 0.026   | 0.471           |
| 2310058N22Rik               | AK009987                    | gb Mus musculus adult male tongue cDNA, RIKEN full-length enriched library, clone:2310058N22 product:unclassifiable, full insert sequence. [AK009987] | 0.48                  | 0.049   | 0.519           |
| Cpne4                       | NM_028719                   | ref Mus musculus copine IV (Cpne4), mRNA [NM_028719]                                                                                                  | 0.48                  | 0.043   | 0.509           |
| chr5:44625083-44634763_F    | chr5:44625083-44634763_F    | lincRNA:chr5:44625083-44634763 forward strand                                                                                                         | 0.48                  | 0.017   | 0.429           |
| chr7:151085617-151100071_R  | chr7:151085617-151100071_R  | lincRNA:chr7:151085617-151100071 reverse strand                                                                                                       | 0.48                  | 0.045   | 0.513           |
| chr2:116796887-116797441_F  | chr2:116796887-116797441_F  | lincRNA:chr2:116796887-116797441 forward strand                                                                                                       | 0.48                  | 0.010   | 0.403           |
| chr9:30805020-30810645_F    | chr9:30805020-30810645_F    | lincRNA:chr9:30805020-30810645 forward strand                                                                                                         | 0.48                  | 0.009   | 0.393           |
| Olfr152                     | NM_146646                   | ref Mus musculus olfactory receptor 152 (Olfr152), mRNA [NM_146646]                                                                                   | 0.48                  | 0.006   | 0.369           |
| chr9:61881173-61881351_R    | chr9:61881173-61881351_R    | lincRNA:chr9:61881173-61881351 reverse strand                                                                                                         | 0.48                  | 0.020   | 0.447           |
| Nrl                         | NM_001136074                | ref Mus musculus neural retina leucine zipper gene (Nrl), transcript variant 2, mRNA [NM_001136074]                                                   | 0.48                  | 0.035   | 0.495           |
| Ptk2b                       | NM_001162365                | ref Mus musculus PTK2 protein tyrosine kinase 2 beta (Ptk2b), transcript variant 2, mRNA [NM_001162365]                                               | 0.48                  | 0.023   | 0.455           |

Online Supplemental Table IV: mG4H-STZ Only

| Gene Symbol                | RefSeq                     | Description                                                                                                                                                                    | logFC<br>mG4H-<br>STZ | P-value | Adj.<br>P-value |
|----------------------------|----------------------------|--------------------------------------------------------------------------------------------------------------------------------------------------------------------------------|-----------------------|---------|-----------------|
| 5730577I03Rik              | NR_033729                  | ref  Mus musculus RIKEN cDNA 5730577I03 gene (5730577I03Rik), non-coding RNA [NR_033729]                                                                                       | 0.48                  | 0.028   | 0.474           |
| chr11:69193341-69193717_F  | chr11:69193341-69193717_F  | lincRNA:chr11:69193341-69193717 forward strand                                                                                                                                 | 0.48                  | 0.025   | 0.463           |
| A2m                        | NM_175628                  | ref  Mus musculus alpha-2-macroglobulin (A2m), mRNA [NM_175628]                                                                                                                | 0.48                  | 0.036   | 0.495           |
| D7Erttd128e                | BG071831                   | gb  H3103F08-3 NIA Mouse 15K cDNA Clone Set Mus musculus cDNA clone H3103F08 3', mRNA sequence [BG071831]                                                                      | 0.48                  | 0.032   | 0.485           |
| Vmn2r108                   | NM_001104570               | ref  Mus musculus vomeronasal 2, receptor 108 (Vmn2r108), mRNA [NM_001104570]                                                                                                  | 0.48                  | 0.017   | 0.429           |
| chr6:83841733-83842297_F   | chr6:83841733-83842297_F   | lincRNA:chr6:83841733-83842297 forward strand                                                                                                                                  | 0.48                  | 0.002   | 0.264           |
| Rpl10l                     | NM_001162933               | ref  Mus musculus ribosomal protein L10-like (Rpl10l), mRNA [NM_001162933]                                                                                                     | 0.48                  | 0.027   | 0.472           |
| Gm3894                     | XM_001479038               | ref  PREDICTED: Mus musculus hypothetical protein LOC100042540 (LOC100042540), mRNA [XM_001479038]                                                                             | 0.48                  | 0.043   | 0.510           |
| LOC100046065               | XM_001476144               | ref  PREDICTED: Mus musculus hypothetical protein LOC100046065 (LOC100046065), mRNA [XM_001476144]                                                                             | 0.48                  | 0.013   | 0.412           |
| Npm2                       | NM_181345                  | ref  Mus musculus nucleophosmin/nucleoplasmin 2 (Npm2), mRNA [NM_181345]                                                                                                       | 0.48                  | 0.007   | 0.377           |
| chr7:118248833-118267766_F | chr7:118248833-118267766_F | lincRNA:chr7:118248833-118267766 forward strand                                                                                                                                | 0.48                  | 0.012   | 0.411           |
| chr3:30064327-30064680_R   | chr3:30064327-30064680_R   | lincRNA:chr3:30064327-30064680 reverse strand                                                                                                                                  | 0.48                  | 0.032   | 0.483           |
| chr13:28067341-28067814_F  | chr13:28067341-28067814_F  | lincRNA:chr13:28067341-28067814 forward strand                                                                                                                                 | 0.47                  | 0.003   | 0.299           |
| A330023F24Rik              | AK171382                   | gb  Mus musculus B6-derived CD11 +ve dendritic cells cDNA, RIKEN full-length enriched library, clone:F730115K06 product:hypothetical protein, full insert sequence. [AK171382] | 0.47                  | 0.024   | 0.458           |
| chr8:129102060-129109035_R | chr8:129102060-129109035_R | lincRNA:chr8:129102060-129109035 reverse strand                                                                                                                                | 0.47                  | 0.048   | 0.516           |
| Gm2129                     | XM_001472592               | ref  PREDICTED: Mus musculus similar to CG2839-PA (LOC100039272), mRNA [XM_001472592]                                                                                          | 0.47                  | 0.016   | 0.428           |
| Catsperb                   | NM_173023                  | ref  Mus musculus cation channel, sperm-associated, beta (Catsperb), mRNA [NM_173023]                                                                                          | 0.47                  | 0.031   | 0.480           |
| Tekt3                      | NM_027660                  | ref  Mus musculus tektin 3 (Tekt3), mRNA [NM_027660]                                                                                                                           | 0.47                  | 0.021   | 0.449           |
| chr5:108543577-108544158_F | chr5:108543577-108544158_F | lincRNA:chr5:108543577-108544158 forward strand                                                                                                                                | 0.47                  | 0.029   | 0.477           |
| ENSMUST00000103278         | ENSMUST00000103278         | Unknown                                                                                                                                                                        | 0.47                  | 0.029   | 0.477           |
| Ga_x5j8b7w2m1k1-552        | XM_913642                  | ref  PREDICTED: Mus musculus similar to olfactory receptor 55 (LOC637849), mRNA [XM_913642]                                                                                    | 0.47                  | 0.002   | 0.266           |
| chr7:107226916-107227672_R | chr7:107226916-107227672_R | lincRNA:chr7:107226916-107227672 reverse strand                                                                                                                                | 0.47                  | 0.038   | 0.499           |
| LOC100037413               | XM_001478421               | ref  PREDICTED: Mus musculus predicted gene, ENSMUSG00000073810 (ENSMUSG00000073810), mRNA [XM_001478421]                                                                      | 0.47                  | 0.011   | 0.407           |
| LOC100045552               | XM_001474520               | ref  PREDICTED: Mus musculus hypothetical protein LOC100045552 (LOC100045552), mRNA [XM_001474520]                                                                             | 0.47                  | 0.039   | 0.500           |
| chr10:96096995-96097589_F  | chr10:96096995-96097589_F  | lincRNA:chr10:96096995-96097589 forward strand                                                                                                                                 | 0.47                  | 0.010   | 0.401           |

Online Supplemental Table IV: mG4H-STZ Only

| Gene Symbol                 | RefSeq                      | Description                                                                                                                                                         | logFC<br>mG4H-<br>STZ | P-value | Adj.<br>P-value |
|-----------------------------|-----------------------------|---------------------------------------------------------------------------------------------------------------------------------------------------------------------|-----------------------|---------|-----------------|
| C030009O12Rik               | AK140124                    | gb Mus musculus adult male corpora quadrigemina cDNA, RIKEN full-length enriched library, clone:B230308O18 product:unclassifiable, full insert sequence. [AK140124] | 0.47                  | 0.007   | 0.372           |
| chr13:103101941-103102362_F | chr13:103101941-103102362_F | lincRNA:chr13:103101941-103102362 forward strand                                                                                                                    | 0.47                  | 0.050   | 0.519           |
| chr9:65368908-65377592_R    | chr9:65368908-65377592_R    | lincRNA:chr9:65368908-65377592 reverse strand                                                                                                                       | 0.47                  | 0.041   | 0.505           |
| chr6:31078802-31079644_R    | chr6:31078802-31079644_R    | lincRNA:chr6:31078802-31079644 reverse strand                                                                                                                       | 0.47                  | 0.033   | 0.490           |
| LOC100047377                | XM_001478020                | ref PREDICTED: Mus musculus hypothetical protein LOC100047377 (LOC100047377), mRNA [XM_001478020]                                                                   | 0.47                  | 0.021   | 0.449           |
| 2700078F05Rik               | AK144254                    | gb Mus musculus 11 days embryo spinal cord cDNA, RIKEN full-length enriched library, clone:G630001L02 product:unclassifiable, full insert sequence. [AK144254]      | 0.47                  | 0.032   | 0.484           |
| chrX:50087925-50101700_F    | chrX:50087925-50101700_F    | lincRNA:chrX:50087925-50101700 forward strand                                                                                                                       | 0.47                  | 0.022   | 0.452           |
| Axin1                       | NM_001159598                | ref Mus musculus axin 1 (Axin1), transcript variant 1, mRNA [NM_001159598]                                                                                          | 0.47                  | 0.031   | 0.480           |
| chr2:71576218-71603818_R    | chr2:71576218-71603818_R    | lincRNA:chr2:71576218-71603818 reverse strand                                                                                                                       | 0.47                  | 0.030   | 0.478           |
| chr3:145313275-145315057_F  | chr3:145313275-145315057_F  | lincRNA:chr3:145313275-145315057 forward strand                                                                                                                     | 0.47                  | 0.013   | 0.412           |
| chr10:62812866-62831016_R   | chr10:62812866-62831016_R   | lincRNA:chr10:62812866-62831016 reverse strand                                                                                                                      | 0.47                  | 0.025   | 0.467           |
| chr1:133839368-133839762_F  | chr1:133839368-133839762_F  | lincRNA:chr1:133839368-133839762 forward strand                                                                                                                     | 0.47                  | 0.050   | 0.520           |
| chr10:39383665-39442690_F   | chr10:39383665-39442690_F   | lincRNA:chr10:39383665-39442690 forward strand                                                                                                                      | 0.47                  | 0.046   | 0.514           |
| Myt1l                       | NM_001093775                | ref Mus musculus myelin transcription factor 1-like (Myt1l), transcript variant 1, mRNA [NM_001093775]                                                              | 0.47                  | 0.013   | 0.412           |
| Olfr161                     | NM_146860                   | ref Mus musculus olfactory receptor 161 (Olfr161), mRNA [NM_146860]                                                                                                 | 0.47                  | 0.041   | 0.505           |
| chr6:133054045-133058002_F  | chr6:133054045-133058002_F  | lincRNA:chr6:133054045-133058002 forward strand                                                                                                                     | 0.47                  | 0.044   | 0.512           |
| chr5:110097500-110118475_R  | chr5:110097500-110118475_R  | lincRNA:chr5:110097500-110118475 reverse strand                                                                                                                     | 0.47                  | 0.009   | 0.393           |
| chr6:31115515-31168433_R    | chr6:31115515-31168433_R    | lincRNA:chr6:31115515-31168433 reverse strand                                                                                                                       | 0.46                  | 0.016   | 0.426           |
| chr5:149751979-149808240_R  | chr5:149751979-149808240_R  | lincRNA:chr5:149751979-149808240 reverse strand                                                                                                                     | 0.46                  | 0.017   | 0.435           |
| chr3:108763862-108772151_R  | chr3:108763862-108772151_R  | lincRNA:chr3:108763862-108772151 reverse strand                                                                                                                     | 0.46                  | 0.037   | 0.498           |
| Ovgp1                       | NM_007696                   | ref Mus musculus oviductal glycoprotein 1 (Ovgp1), mRNA [NM_007696]                                                                                                 | 0.46                  | 0.022   | 0.452           |
| LOC634206                   | XM_908868                   | ref PREDICTED: Mus musculus similar to lgh-1a protein (LOC634206), mRNA [XM_908868]                                                                                 | 0.46                  | 0.035   | 0.495           |
| chr3:87757295-87774970_R    | chr3:87757295-87774970_R    | lincRNA:chr3:87757295-87774970 reverse strand                                                                                                                       | 0.46                  | 0.022   | 0.452           |
| ENSMUST00000089922          | ENSMUST00000089922          | ens splicing factor, arginine/serine-rich 11 Gene [Source:MGI (curated);Acc:MGI:1916457] [ENSMUST00000089922]                                                       | 0.46                  | 0.046   | 0.514           |
| chr14:115443612-115445950_F | chr14:115443612-115445950_F | lincRNA:chr14:115443612-115445950 forward strand                                                                                                                    | 0.46                  | 0.044   | 0.512           |
| chr5:22887983-22939658_R    | chr5:22887983-22939658_R    | lincRNA:chr5:22887983-22939658 reverse strand                                                                                                                       | 0.46                  | 0.047   | 0.515           |

| Online Supplemental Table IV: mG4H-STZ Only |                             |                                                                                                                                                                           |                       |         |                 |
|---------------------------------------------|-----------------------------|---------------------------------------------------------------------------------------------------------------------------------------------------------------------------|-----------------------|---------|-----------------|
| Gene Symbol                                 | RefSeq                      | Description                                                                                                                                                               | logFC<br>mG4H-<br>STZ | P-value | Adj.<br>P-value |
| chr6:30983012-31009987_R                    | chr6:30983012-31009987_R    | lincRNA:chr6:30983012-31009987 reverse strand                                                                                                                             | 0.46                  | 0.015   | 0.423           |
| 4932442L08Rik                               | XM_904867                   | ref  PREDICTED: Mus musculus similar to Putative uncharacterized protein CXorf58 (LOC631145), mRNA [XM_904867]                                                            | 0.46                  | 0.039   | 0.501           |
| Il5                                         | NM_010558                   | ref  Mus musculus interleukin 5 (Il5), mRNA [NM_010558]                                                                                                                   | 0.46                  | 0.041   | 0.507           |
| Cela1                                       | NM_033612                   | ref  Mus musculus chymotrypsin-like elastase family, member 1 (Cela1), mRNA [NM_033612]                                                                                   | 0.46                  | 0.021   | 0.447           |
| LOC639470                                   | XM_915912                   | ref  PREDICTED: Mus musculus similar to nucleoporin 85 (LOC639470), mRNA [XM_915912]                                                                                      | 0.46                  | 0.035   | 0.495           |
| chr8:49915104-49915704_R                    | chr8:49915104-49915704_R    | lincRNA:chr8:49915104-49915704 reverse strand                                                                                                                             | 0.46                  | 0.007   | 0.377           |
| 1700030J22Rik                               | NM_027103                   | ref  Mus musculus RIKEN cDNA 1700030J22 gene (1700030J22Rik), mRNA [NM_027103]                                                                                            | 0.46                  | 0.022   | 0.453           |
| chr17:87674225-87682154_R                   | chr17:87674225-87682154_R   | lincRNA:chr17:87674225-87682154 reverse strand                                                                                                                            | 0.46                  | 0.021   | 0.450           |
| chr6:82608223-82669023_F                    | chr6:82608223-82669023_F    | lincRNA:chr6:82608223-82669023 forward strand                                                                                                                             | 0.46                  | 0.027   | 0.471           |
| Uba1                                        | NM_009457                   | ref  Mus musculus ubiquitin-like modifier activating enzyme 1 (Uba1), transcript variant 1, mRNA [NM_009457]                                                              | 0.46                  | 0.023   | 0.456           |
| Gm6566                                      | XM_982004                   | ref  PREDICTED: Mus musculus predicted gene, EG625237 (EG625237), mRNA [XM_982004]                                                                                        | 0.46                  | 0.016   | 0.427           |
| chr4:131738732-131739264_F                  | chr4:131738732-131739264_F  | lincRNA:chr4:131738732-131739264 forward strand                                                                                                                           | 0.46                  | 0.021   | 0.450           |
| D930001B02                                  | AK147582                    | gb  Mus musculus adult male brain UNDEFINED_CELL_LINE cDNA, RIKEN full-length enriched library, clone:M5C1083B17 product:unclassifiable, full insert sequence. [AK147582] | 0.46                  | 0.030   | 0.477           |
| chr7:132218864-132329172_F                  | chr7:132218864-132329172_F  | lincRNA:chr7:132218864-132329172 forward strand                                                                                                                           | 0.46                  | 0.047   | 0.516           |
| Foxo3                                       | NM_019740                   | ref  Mus musculus forkhead box O3 (Foxo3), mRNA [NM_019740]                                                                                                               | 0.46                  | 0.004   | 0.330           |
| chr11:114686321-114705990_F                 | chr11:114686321-114705990_F | lincRNA:chr11:114686321-114705990 forward strand                                                                                                                          | 0.46                  | 0.041   | 0.505           |
| chrX:20555593-20591971_R                    | chrX:20555593-20591971_R    | lincRNA:chrX:20555593-20591971 reverse strand                                                                                                                             | 0.46                  | 0.041   | 0.506           |
| chr5:54295266-54307541_F                    | chr5:54295266-54307541_F    | lincRNA:chr5:54295266-54307541 forward strand                                                                                                                             | 0.46                  | 0.034   | 0.493           |
| Tmem30c                                     | NM_027651                   | ref  Mus musculus transmembrane protein 30C (Tmem30c), mRNA [NM_027651]                                                                                                   | 0.46                  | 0.021   | 0.449           |
| chr19:14911511-14911831_R                   | chr19:14911511-14911831_R   | lincRNA:chr19:14911511-14911831 reverse strand                                                                                                                            | 0.46                  | 0.019   | 0.439           |
| chr18:38776580-38841080_R                   | chr18:38776580-38841080_R   | lincRNA:chr18:38776580-38841080 reverse strand                                                                                                                            | 0.46                  | 0.047   | 0.515           |
| chr3:30059174-30060808_R                    | chr3:30059174-30060808_R    | lincRNA:chr3:30059174-30060808 reverse strand                                                                                                                             | 0.46                  | 0.009   | 0.398           |
| Vmn2r90                                     | NM_001104539                | ref  Mus musculus vomeronasal 2, receptor 90 (Vmn2r90), mRNA [NM_001104539]                                                                                               | 0.46                  | 0.032   | 0.485           |
| ENSMUST00000063789                          | ENSMUST00000063789          | ens  Putative uncharacterized protein [Source:UniProtKB/TrEMBL;Acc:Q8CDH0] [ENSMUST00000063789]                                                                           | 0.46                  | 0.021   | 0.450           |
| Olfr151                                     | NM_207664                   | ref  Mus musculus olfactory receptor 151 (Olfr151), mRNA [NM_207664]                                                                                                      | 0.45                  | 0.033   | 0.487           |
| Rev1                                        | NM_019570                   | ref  Mus musculus REV1 homolog (S. cerevisiae) (Rev1), mRNA [NM_019570]                                                                                                   | 0.45                  | 0.048   | 0.518           |

Online Supplemental Table IV: mG4H-STZ Only

| Gene Symbol                 | RefSeq                      | Description                                                                                                                                             | logFC<br>mG4H-<br>STZ | P-value | Adj.<br>P-value |
|-----------------------------|-----------------------------|---------------------------------------------------------------------------------------------------------------------------------------------------------|-----------------------|---------|-----------------|
| Mettl7a2-Higd1c             | NM_001024672                | ref Mus musculus Mettl7a2-Higd1c readthrough transcript (Mettl7a2-Higd1c), mRNA [NM_001024672]                                                          | 0.45                  | 0.032   | 0.485           |
| Hist1h2bg                   | NM_178196                   | ref Mus musculus histone cluster 1, H2bg (Hist1h2bg), mRNA [NM_178196]                                                                                  | 0.45                  | 0.020   | 0.443           |
| AA386476                    | XM_620653                   | ref PREDICTED: Mus musculus hypothetical protein LOC546058 (LOC546058), mRNA [XM_620653]                                                                | 0.45                  | 0.008   | 0.391           |
| Zfp369                      | NM_178364                   | ref Mus musculus zinc finger protein 369 (Zfp369), mRNA [NM_178364]                                                                                     | 0.45                  | 0.021   | 0.448           |
| chr1:138528250-138538250_R  | chr1:138528250-138538250_R  | lincRNA:chr1:138528250-138538250 reverse strand                                                                                                         | 0.45                  | 0.032   | 0.485           |
| Fbln5                       | NM_011812                   | ref Mus musculus fibulin 5 (Fbln5), mRNA [NM_011812]                                                                                                    | 0.45                  | 0.033   | 0.489           |
| chr4:131734714-131742542_R  | chr4:131734714-131742542_R  | lincRNA:chr4:131734714-131742542 reverse strand                                                                                                         | 0.45                  | 0.034   | 0.492           |
| Triobp                      | NM_001039155                | ref Mus musculus TRIO and F-actin binding protein (Triobp), transcript variant 4, mRNA [NM_001039155]                                                   | 0.45                  | 0.014   | 0.418           |
| chr14:55317199-55317670_R   | chr14:55317199-55317670_R   | lincRNA:chr14:55317199-55317670 reverse strand                                                                                                          | 0.45                  | 0.030   | 0.477           |
| Gm7659                      | XM_977275                   | ref PREDICTED: Mus musculus predicted gene, EG665490 (EG665490), mRNA [XM_977275]                                                                       | 0.45                  | 0.028   | 0.476           |
| chr9:88333945-88342370_R    | chr9:88333945-88342370_R    | lincRNA:chr9:88333945-88342370 reverse strand                                                                                                           | 0.45                  | 0.024   | 0.459           |
| 4933436E23Rik               | AK017079                    | gb   Mus musculus adult male testis cDNA, RIKEN full-length enriched library, clone:4933436E23 product:unclassifiable, full insert sequence. [AK017079] | 0.45                  | 0.024   | 0.459           |
| C80360                      | C80360                      | gb   C80360 Mouse 3.5-dpc blastocyst cDNA Mus musculus cDNA clone J0080C10 3', mRNA sequence [C80360]                                                   | 0.45                  | 0.022   | 0.452           |
| Epb4.1                      | NM_183428                   | ref Mus musculus erythrocyte protein band 4.1 (Epb4.1), transcript variant 1, mRNA [NM_183428]                                                          | 0.45                  | 0.023   | 0.455           |
| chr1:167215985-167216196_F  | chr1:167215985-167216196_F  | lincRNA:chr1:167215985-167216196 forward strand                                                                                                         | 0.45                  | 0.037   | 0.496           |
| chr6:90848183-90861277_R    | chr6:90848183-90861277_R    | lincRNA:chr6:90848183-90861277 reverse strand                                                                                                           | 0.45                  | 0.008   | 0.388           |
| Abhd4                       | NM_134076                   | ref Mus musculus abhydrolase domain containing 4 (Abhd4), mRNA [NM_134076]                                                                              | 0.45                  | 0.033   | 0.490           |
| Gm5977                      | XR_004811                   | ref PREDICTED: Mus musculus similar to neural visinin-like Ca2+-binding protein type 3 (LOC675641), misc RNA [XR_004811]                                | 0.45                  | 0.037   | 0.497           |
| Gad1                        | NM_008077                   | ref Mus musculus glutamic acid decarboxylase 1 (Gad1), mRNA [NM_008077]                                                                                 | 0.45                  | 0.042   | 0.509           |
| Baz1a                       | NM_013815                   | ref Mus musculus bromodomain adjacent to zinc finger domain 1A (Baz1a), mRNA [NM_013815]                                                                | 0.45                  | 0.039   | 0.500           |
| chr10:116814196-116920696_F | chr10:116814196-116920696_F | lincRNA:chr10:116814196-116920696 forward strand                                                                                                        | 0.45                  | 0.028   | 0.476           |
| chr18:83087114-83122014_R   | chr18:83087114-83122014_R   | lincRNA:chr18:83087114-83122014 reverse strand                                                                                                          | 0.45                  | 0.006   | 0.356           |
| chr18:47690173-47697423_F   | chr18:47690173-47697423_F   | lincRNA:chr18:47690173-47697423 forward strand                                                                                                          | 0.45                  | 0.038   | 0.499           |
| chr14:105987405-106063477_F | chr14:105987405-106063477_F | lincRNA:chr14:105987405-106063477 forward strand                                                                                                        | 0.45                  | 0.018   | 0.437           |
| chr3:84617945-84618316_R    | chr3:84617945-84618316_R    | lincRNA:chr3:84617945-84618316 reverse strand                                                                                                           | 0.45                  | 0.014   | 0.418           |
| Satl1                       | NM_028655                   | ref Mus musculus spermidine/spermine N1-acetyl transferase-like 1 (Satl1), mRNA [NM_028655]                                                             | 0.45                  | 0.044   | 0.512           |
| Lao1                        | NM_133892                   | ref Mus musculus L-amino acid oxidase 1 (Lao1), mRNA [NM_133892]                                                                                        | 0.45                  | 0.021   | 0.449           |

| Online Supplemental Table IV: mG4H-STZ Only |                            |                                                                                                                                                                                 |                       |         |                 |
|---------------------------------------------|----------------------------|---------------------------------------------------------------------------------------------------------------------------------------------------------------------------------|-----------------------|---------|-----------------|
| Gene Symbol                                 | RefSeq                     | Description                                                                                                                                                                     | logFC<br>mG4H-<br>STZ | P-value | Adj.<br>P-value |
| chr6:31115515-31168433_R                    | chr6:31115515-31168433_R   | lincRNA:chr6:31115515-31168433 reverse strand                                                                                                                                   | 0.45                  | 0.032   | 0.485           |
| Lrit1                                       | NM_146245                  | ref  Mus musculus leucine-rich repeat, immunoglobulin-like and transmembrane domains 1 (Lrit1), mRNA [NM_146245]                                                                | 0.45                  | 0.024   | 0.459           |
| Cyp2w1                                      | NM_001160265               | ref  Mus musculus cytochrome P450, family 2, subfamily w, polypeptide 1 (Cyp2w1), mRNA [NM_001160265]                                                                           | 0.45                  | 0.046   | 0.513           |
| Synpo2                                      | NM_080451                  | ref  Mus musculus synaptopodin 2 (Synpo2), mRNA [NM_080451]                                                                                                                     | 0.45                  | 0.007   | 0.384           |
| E230012P03                                  | AK054025                   | gb  Mus musculus 2 days pregnant adult female oviduct cDNA, RIKEN full-length enriched library, clone:E230012P03 product:hypothetical protein, full insert sequence. [AK054025] | 0.45                  | 0.036   | 0.496           |
| chr16:40657997-40658456_R                   | chr16:40657997-40658456_R  | lincRNA:chr16:40657997-40658456 reverse strand                                                                                                                                  | 0.45                  | 0.048   | 0.517           |
| chr1:64686823-64728598_F                    | chr1:64686823-64728598_F   | lincRNA:chr1:64686823-64728598 forward strand                                                                                                                                   | 0.45                  | 0.037   | 0.498           |
| chr5:75186625-75186910_F                    | chr5:75186625-75186910_F   | lincRNA:chr5:75186625-75186910 forward strand                                                                                                                                   | 0.44                  | 0.017   | 0.433           |
| chr17:38132217-38157667_F                   | chr17:38132217-38157667_F  | lincRNA:chr17:38132217-38157667 forward strand                                                                                                                                  | 0.44                  | 0.048   | 0.518           |
| Wfikkn2                                     | NM_181819                  | ref  Mus musculus WAP, follistatin/kazal, immunoglobulin, kunitz and netrin domain containing 2 (Wfikkn2), mRNA [NM_181819]                                                     | 0.44                  | 0.003   | 0.290           |
| chr5:110182844-110228345_R                  | chr5:110182844-110228345_R | lincRNA:chr5:110182844-110228345 reverse strand                                                                                                                                 | 0.44                  | 0.046   | 0.513           |
| 2010001E11Rik                               | NM_001163503               | ref  Mus musculus RIKEN cDNA 2010001E11 gene (2010001E11Rik), mRNA [NM_001163503]                                                                                               | 0.44                  | 0.029   | 0.477           |
| chr4:119923882-119924244_R                  | chr4:119923882-119924244_R | lincRNA:chr4:119923882-119924244 reverse strand                                                                                                                                 | 0.44                  | 0.018   | 0.435           |
| Herc1                                       | NM_145617                  | ref  Mus musculus hect (homologous to the E6-AP (UBE3A) carboxyl terminus) domain and RCC1 (CHC1)-like domain (RLD) 1 (Herc1), mRNA [NM_145617]                                 | 0.44                  | 0.036   | 0.495           |
| chr5:110964854-110965222_F                  | chr5:110964854-110965222_F | lincRNA:chr5:110964854-110965222 forward strand                                                                                                                                 | 0.44                  | 0.040   | 0.502           |
| Gtf2ird2                                    | NM_053266                  | ref  Mus musculus GTF2I repeat domain containing 2 (Gtf2ird2), mRNA [NM_053266]                                                                                                 | 0.44                  | 0.011   | 0.406           |
| chr11:33414450-33450750_F                   | chr11:33414450-33450750_F  | lincRNA:chr11:33414450-33450750 forward strand                                                                                                                                  | 0.44                  | 0.048   | 0.518           |
| Tnc                                         | NM_011607                  | ref  Mus musculus tenascin C (Tnc), mRNA [NM_011607]                                                                                                                            | 0.44                  | 0.042   | 0.508           |
| ENSMUST00000036223                          | ENSMUST00000036223         | ens  SH3 domain containing ring finger 3 Gene [Source:MGI (curated);Acc:MGI:2444637] [ENSMUST00000036223]                                                                       | 0.44                  | 0.009   | 0.394           |
| chr4:124127144-124334840_R                  | chr4:124127144-124334840_R | lincRNA:chr4:124127144-124334840 reverse strand                                                                                                                                 | 0.44                  | 0.050   | 0.520           |
| chr18:69923410-69965360_R                   | chr18:69923410-69965360_R  | lincRNA:chr18:69923410-69965360 reverse strand                                                                                                                                  | 0.44                  | 0.032   | 0.483           |
| Gm9487                                      | XR_032777                  | ref  PREDICTED: Mus musculus similar to Glyceraldehyde-3-phosphate dehydrogenase (GAPDH) (LOC675823), misc RNA [XR_032777]                                                      | 0.44                  | 0.018   | 0.435           |
| chr5:74487385-74497428_R                    | chr5:74487385-74497428_R   | lincRNA:chr5:74487385-74497428 reverse strand                                                                                                                                   | 0.44                  | 0.041   | 0.505           |
| Cd247                                       | NM_031162                  | ref  Mus musculus CD247 antigen (Cd247), transcript variant eta, mRNA [NM_031162]                                                                                               | 0.44                  | 0.037   | 0.497           |
| Gpr37                                       | NM_010338                  | ref  Mus musculus G protein-coupled receptor 37 (Gpr37), mRNA [NM_010338]                                                                                                       | 0.44                  | 0.050   | 0.519           |



Online Supplemental Table IV: mG4H-STZ Only

| Gene Symbol                | RefSeq                     | Description                                                                                                                           | logFC<br>mG4H-<br>STZ | P-value | Adj.<br>P-value |
|----------------------------|----------------------------|---------------------------------------------------------------------------------------------------------------------------------------|-----------------------|---------|-----------------|
| Anks4b                     | NM_028085                  | ref  Mus musculus ankyrin repeat and sterile alpha motif domain containing 4B (Anks4b), mRNA [NM_028085]                              | 0.44                  | 0.048   | 0.516           |
| Foxi2                      | NM_183193                  | ref  Mus musculus forkhead box I2 (Foxi2), mRNA [NM_183193]                                                                           | 0.44                  | 0.015   | 0.421           |
| 4930474N05Rik              | NM_175008                  | ref  Mus musculus RIKEN cDNA 4930474N05 gene (4930474N05Rik), mRNA [NM_175008]                                                        | 0.44                  | 0.023   | 0.456           |
| Kidins220                  | NM_001081378               | ref  Mus musculus kinase D-interacting substrate 220 (Kidins220), mRNA [NM_001081378]                                                 | 0.44                  | 0.038   | 0.499           |
| LOC676827                  | XR_031136                  | ref  PREDICTED: Mus musculus similar to farnesyl pyrophosphate synthase (LOC676827), misc RNA [XR_031136]                             | 0.44                  | 0.043   | 0.509           |
| chr5:104936417-104984892_F | chr5:104936417-104984892_F | lincRNA:chr5:104936417-104984892 forward strand                                                                                       | 0.44                  | 0.021   | 0.450           |
| ENSMUST00000120532         | ENSMUST00000120532         | ens  histone cell cycle regulation defective homolog A (S. cerevisiae) Gene [Source:MGI (curated);Acc:MGI:99430] [ENSMUST00000120532] | 0.44                  | 0.033   | 0.488           |
| LOC674345                  | XR_030704                  | ref  PREDICTED: Mus musculus similar to Sorting nexin 4 (LOC674345), misc RNA [XR_030704]                                             | 0.44                  | 0.014   | 0.418           |
| chr15:10697243-10699102_F  | chr15:10697243-10699102_F  | lincRNA:chr15:10697243-10699102 forward strand                                                                                        | 0.43                  | 0.020   | 0.447           |
| Chrd                       | NM_009893                  | ref  Mus musculus chordin (Chrd), mRNA [NM_009893]                                                                                    | 0.43                  | 0.036   | 0.495           |
| chr10:39405900-39406539_R  | chr10:39405900-39406539_R  | lincRNA:chr10:39405900-39406539 reverse strand                                                                                        | 0.43                  | 0.012   | 0.408           |
| chr2:156654675-156665430_R | chr2:156654675-156665430_R | lincRNA:chr2:156654675-156665430 reverse strand                                                                                       | 0.43                  | 0.028   | 0.476           |
| LOC100046302               | XM_001475985               | ref  PREDICTED: Mus musculus similar to Protein disulfide isomerase associated 6 (LOC100046302), mRNA [XM_001475985]                  | 0.43                  | 0.010   | 0.400           |
| Itrip1                     | NM_001001738               | ref  Mus musculus inositol 1,4,5-triphosphate receptor interacting protein (Itrip1), mRNA [NM_001001738]                              | 0.43                  | 0.014   | 0.418           |
| Mcm9                       | NM_027830                  | ref  Mus musculus minichromosome maintenance complex component 9 (Mcm9), mRNA [NM_027830]                                             | 0.43                  | 0.034   | 0.491           |
| Tmprss2                    | NM_015775                  | ref  Mus musculus transmembrane protease, serine 2 (Tmprss2), mRNA [NM_015775]                                                        | 0.43                  | 0.049   | 0.519           |
| Fibcd1                     | NM_178887                  | ref  Mus musculus fibrinogen C domain containing 1 (Fibcd1), mRNA [NM_178887]                                                         | 0.43                  | 0.011   | 0.407           |
| Fam71a                     | NM_001109759               | ref  Mus musculus family with sequence similarity 71, member A (Fam71a), mRNA [NM_001109759]                                          | 0.43                  | 0.024   | 0.461           |
| Gm3936                     | XM_001478524               | ref  PREDICTED: Mus musculus hypothetical protein LOC100042628 (LOC100042628), mRNA [XM_001478524]                                    | 0.43                  | 0.041   | 0.505           |
| Bglap                      | NM_001037939               | ref  Mus musculus bone gamma carboxylglutamate protein (Bglap), transcript variant 2, mRNA [NM_001037939]                             | 0.43                  | 0.048   | 0.516           |
| Exoc6b                     | ENSMUST00000046334         | ens  exocyst complex component 6B Gene [Source:MGI Symbol;Acc:MGI:1923164] [ENSMUST00000046334]                                       | 0.43                  | 0.012   | 0.412           |
| Apol6                      | NM_001163621               | ref  Mus musculus apolipoprotein L 6 (Apol6), transcript variant 2, mRNA [NM_001163621]                                               | 0.43                  | 0.031   | 0.482           |
| ENSMUST00000081475         | ENSMUST00000081475         | ens  collagen, type XII, alpha 1 Gene [Source:MGI (curated);Acc:MGI:88448] [ENSMUST00000081475]                                       | 0.43                  | 0.032   | 0.485           |
| chr14:78957377-78962977_R  | chr14:78957377-78962977_R  | lincRNA:chr14:78957377-78962977 reverse strand                                                                                        | 0.43                  | 0.011   | 0.406           |
| Tmem190                    | NM_030028                  | ref  Mus musculus transmembrane protein 190 (Tmem190), mRNA [NM_030028]                                                               | 0.43                  | 0.027   | 0.471           |
| ENSMUST00000101060         | ENSMUST00000101060         | ens  Putative uncharacterized protein [Source:UniProtKB/TrEMBL;Acc:Q3UQ53] [ENSMUST00000101060]                                       | 0.43                  | 0.019   | 0.439           |

Online Supplemental Table IV: mG4H-STZ Only

| Gene Symbol                 | RefSeq                      | Description                                                                                                                                                         | logFC<br>mG4H-<br>STZ | P-value | Adj.<br>P-value |
|-----------------------------|-----------------------------|---------------------------------------------------------------------------------------------------------------------------------------------------------------------|-----------------------|---------|-----------------|
| ENSMUST00000109629          | ENSMUST00000109629          | ens  Novel protein, possible ortholog of human growth differentiation factor 5 opposite strand GDF5OS [Source:UniProtKB/TrEMBL;Acc:A6PWY0] [ENSMUST00000109629]     | 0.43                  | 0.038   | 0.499           |
| Gm2381                      | XM_001472741                | ref  PREDICTED: Mus musculus similar to Predicted gene, EG434179 (LOC100039706), mRNA [XM_001472741]                                                                | 0.43                  | 0.028   | 0.476           |
| Gm2312                      | XM_001473116                | ref  PREDICTED: Mus musculus similar to ZK84.1 (LOC100039562), mRNA [XM_001473116]                                                                                  | 0.43                  | 0.049   | 0.519           |
| Nfx1                        | NM_023739                   | ref  Mus musculus nuclear transcription factor, X-box binding 1 (Nfx1), mRNA [NM_023739]                                                                            | 0.43                  | 0.047   | 0.515           |
| Mycs                        | NM_010850                   | ref  Mus musculus myc-like oncogene, s-myc protein (Mycs), mRNA [NM_010850]                                                                                         | 0.43                  | 0.049   | 0.519           |
| chr19:57426515-57435165_R   | chr19:57426515-57435165_R   | lincRNA:chr19:57426515-57435165 reverse strand                                                                                                                      | 0.43                  | 0.050   | 0.520           |
| Adams8                      | NM_013906                   | ref  Mus musculus a disintegrin-like and metalloproteinase (reprolysin type) with thrombospondin type 1 motif, 8 (Adams8), mRNA [NM_013906]                         | 0.43                  | 0.037   | 0.498           |
| chr8:111669528-111771285_R  | chr8:111669528-111771285_R  | lincRNA:chr8:111669528-111771285 reverse strand                                                                                                                     | 0.43                  | 0.025   | 0.466           |
| chr1:133839368-133839762_F  | chr1:133839368-133839762_F  | lincRNA:chr1:133839368-133839762 forward strand                                                                                                                     | 0.43                  | 0.009   | 0.398           |
| B130019D13Rik               | AK045009                    | gb  Mus musculus 9.5 days embryo parthenogenote cDNA, RIKEN full-length enriched library, clone:B130019D13 product:unclassifiable, full insert sequence. [AK045009] | 0.43                  | 0.026   | 0.470           |
| Cd320                       | NM_019421                   | ref  Mus musculus CD320 antigen (Cd320), mRNA [NM_019421]                                                                                                           | 0.42                  | 0.040   | 0.504           |
| chr2:65240793-65292293_R    | chr2:65240793-65292293_R    | lincRNA:chr2:65240793-65292293 reverse strand                                                                                                                       | 0.42                  | 0.047   | 0.514           |
| chr15:74320784-74321384_F   | chr15:74320784-74321384_F   | lincRNA:chr15:74320784-74321384 forward strand                                                                                                                      | 0.42                  | 0.020   | 0.443           |
| ENSMUST00000104970          | ENSMUST00000104970          | ens  LOC100049166 protein Fragment [Source:UniProtKB/TrEMBL;Acc:Q923D0] [ENSMUST00000104970]                                                                        | 0.42                  | 0.046   | 0.513           |
| chr1:182180931-182186106_F  | chr1:182180931-182186106_F  | lincRNA:chr1:182180931-182186106 forward strand                                                                                                                     | 0.42                  | 0.011   | 0.406           |
| A530041M06Rik               | AK040901                    | gb  Mus musculus adult male aorta and vein cDNA, RIKEN full-length enriched library, clone:A530041M06 product:unclassifiable, full insert sequence. [AK040901]      | 0.42                  | 0.011   | 0.406           |
| A630075F10Rik               | NR_033632                   | ref  Mus musculus RIKEN cDNA A630075F10 gene (A630075F10Rik), non-coding RNA [NR_033632]                                                                            | 0.42                  | 0.014   | 0.414           |
| chr17:88466300-88495175_F   | chr17:88466300-88495175_F   | lincRNA:chr17:88466300-88495175 forward strand                                                                                                                      | 0.42                  | 0.035   | 0.495           |
| ENSMUST00000101281          | ENSMUST00000101281          | ens  Putative uncharacterized protein [Source:UniProtKB/TrEMBL;Acc:Q3UW49] [ENSMUST00000101281]                                                                     | 0.42                  | 0.018   | 0.437           |
| Gm7049                      | XR_032791                   | ref  PREDICTED: Mus musculus similar to Mod1 protein (LOC630951), misc RNA [XR_032791]                                                                              | 0.42                  | 0.026   | 0.470           |
| TC1719062                   | TC1719062                   | Unknown                                                                                                                                                             | 0.42                  | 0.034   | 0.491           |
| Gltpd2                      | NM_146020                   | ref  Mus musculus glycolipid transfer protein domain containing 2 (Gltpd2), mRNA [NM_146020]                                                                        | 0.42                  | 0.037   | 0.497           |
| chr10:116814196-116920696_R | chr10:116814196-116920696_R | lincRNA:chr10:116814196-116920696 reverse strand                                                                                                                    | 0.42                  | 0.050   | 0.519           |
| chr17:13020750-13033750_R   | chr17:13020750-13033750_R   | lincRNA:chr17:13020750-13033750 reverse strand                                                                                                                      | 0.42                  | 0.047   | 0.515           |
| BC005537                    | NM_024473                   | ref  Mus musculus cDNA sequence BC005537 (BC005537), mRNA [NM_024473]                                                                                               | 0.42                  | 0.039   | 0.499           |

Online Supplemental Table IV: mG4H-STZ Only

| Gene Symbol                       | RefSeq                     | Description                                                                                                                                                     | logFC<br>mG4H-<br>STZ | P-value | Adj.<br>P-value |
|-----------------------------------|----------------------------|-----------------------------------------------------------------------------------------------------------------------------------------------------------------|-----------------------|---------|-----------------|
| <b>Fgf3</b>                       | NM_008007                  | ref  Mus musculus fibroblast growth factor 3 (Fgf3), mRNA [NM_008007]                                                                                           | 0.42                  | 0.025   | 0.466           |
| <b>Adam28</b>                     | NM_183366                  | ref  Mus musculus a disintegrin and metallopeptidase domain 28 (Adam28), transcript variant 2, mRNA [NM_183366]                                                 | 0.42                  | 0.038   | 0.499           |
| <b>Csf3</b>                       | NM_009971                  | ref  Mus musculus colony stimulating factor 3 (granulocyte) (Csf3), mRNA [NM_009971]                                                                            | 0.42                  | 0.038   | 0.498           |
| <b>Olfir323</b>                   | NM_146376                  | ref  Mus musculus olfactory receptor 323 (Olfir323), mRNA [NM_146376]                                                                                           | 0.42                  | 0.024   | 0.458           |
| <b>chr3:145270309-145270779_F</b> | chr3:145270309-145270779_F | lincRNA:chr3:145270309-145270779 forward strand                                                                                                                 | 0.42                  | 0.029   | 0.477           |
| <b>chr11:59215375-59215935_R</b>  | chr11:59215375-59215935_R  | lincRNA:chr11:59215375-59215935 reverse strand                                                                                                                  | 0.42                  | 0.041   | 0.507           |
| <b>Hc</b>                         | NM_010406                  | ref  Mus musculus hemolytic complement (Hc), mRNA [NM_010406]                                                                                                   | 0.42                  | 0.004   | 0.320           |
| <b>GalntI4</b>                    | NM_173739                  | ref  Mus musculus UDP-N-acetyl-alpha-D-galactosamine:polypeptide N-acetylglucosaminyltransferase-like 4 (GalntI4), mRNA [NM_173739]                             | 0.42                  | 0.032   | 0.485           |
| <b>ENSMUST00000074481</b>         | ENSMUST00000074481         | Unknown                                                                                                                                                         | 0.42                  | 0.035   | 0.494           |
| <b>chr8:18895366-18925423_R</b>   | chr8:18895366-18925423_R   | lincRNA:chr8:18895366-18925423 reverse strand                                                                                                                   | 0.42                  | 0.030   | 0.477           |
| <b>ENSMUST00000098232</b>         | ENSMUST00000098232         | ens  Putative uncharacterized protein [Source:UniProtKB/TrEMBL;Acc:Q3UTS3] [ENSMUST00000098232]                                                                 | 0.42                  | 0.031   | 0.482           |
| <b>Cd47</b>                       | NM_010581                  | ref  Mus musculus CD47 antigen (Rh-related antigen, integrin-associated signal transducer) (Cd47), mRNA [NM_010581]                                             | 0.42                  | 0.029   | 0.477           |
| <b>Galnt14</b>                    | NM_027864                  | ref  Mus musculus UDP-N-acetyl-alpha-D-galactosamine:polypeptide N-acetylglucosaminyltransferase 14 (Galnt14), mRNA [NM_027864]                                 | 0.42                  | 0.032   | 0.484           |
| <b>Nek10</b>                      | NM_001034865               | ref  Mus musculus NIMA (never in mitosis gene a)-related kinase 10 (Nek10), mRNA [NM_001034865]                                                                 | 0.42                  | 0.019   | 0.439           |
| <b>Asap1</b>                      | NM_010026                  | ref  Mus musculus ArfGAP with SH# domain, ankyrin repeat and PH domain1 (Asap1), mRNA [NM_010026]                                                               | 0.42                  | 0.031   | 0.480           |
| <b>chr17:79042382-79052046_F</b>  | chr17:79042382-79052046_F  | lincRNA:chr17:79042382-79052046 forward strand                                                                                                                  | 0.42                  | 0.027   | 0.472           |
| <b>Sh3bp1</b>                     | NM_009164                  | ref  Mus musculus SH3-domain binding protein 1 (Sh3bp1), mRNA [NM_009164]                                                                                       | 0.42                  | 0.014   | 0.416           |
| <b>5330406M23Rik</b>              | AK017236                   | gb  Mus musculus adult male pituitary gland cDNA, RIKEN full-length enriched library, clone:5330406M23 product:unclassifiable, full insert sequence. [AK017236] | 0.42                  | 0.035   | 0.495           |
| <b>Olfir1038-ps</b>               | NM_147013                  | ref  Mus musculus olfactory receptor 1038, pseudogene (Olfir1038-ps), mRNA [NM_147013]                                                                          | 0.42                  | 0.010   | 0.405           |
| <b>chr6:117528735-117562588_R</b> | chr6:117528735-117562588_R | lincRNA:chr6:117528735-117562588 reverse strand                                                                                                                 | 0.42                  | 0.045   | 0.513           |
| <b>chr9:82991830-82999937_F</b>   | chr9:82991830-82999937_F   | lincRNA:chr9:82991830-82999937 forward strand                                                                                                                   | 0.42                  | 0.027   | 0.471           |
| <b>Plekhg4</b>                    | NM_001081333               | ref  Mus musculus pleckstrin homology domain containing, family G (with RhoGef domain) member 4 (Plekhg4), mRNA [NM_001081333]                                  | 0.42                  | 0.006   | 0.369           |
| <b>chr10:94848446-94874121_F</b>  | chr10:94848446-94874121_F  | lincRNA:chr10:94848446-94874121 forward strand                                                                                                                  | 0.42                  | 0.025   | 0.463           |
| <b>chr6:90848183-90861277_R</b>   | chr6:90848183-90861277_R   | lincRNA:chr6:90848183-90861277 reverse strand                                                                                                                   | 0.42                  | 0.019   | 0.439           |

| Online Supplemental Table IV: mG4H-STZ Only |                            |                                                                                                                                         |                       |         |                 |
|---------------------------------------------|----------------------------|-----------------------------------------------------------------------------------------------------------------------------------------|-----------------------|---------|-----------------|
| Gene Symbol                                 | RefSeq                     | Description                                                                                                                             | logFC<br>mG4H-<br>STZ | P-value | Adj.<br>P-value |
| Vmn2r91                                     | NM_001104540               | ref  Mus musculus vomeronasal 2, receptor 91 (Vmn2r91), mRNA [NM_001104540]                                                             | 0.42                  | 0.038   | 0.499           |
| LOC100044612                                | XM_001472707               | ref  PREDICTED: Mus musculus similar to exportin, tRNA (nuclear export receptor for tRNAs) (LOC100044612), mRNA [XM_001472707]          | 0.41                  | 0.031   | 0.482           |
| Ly75                                        | NM_013825                  | ref  Mus musculus lymphocyte antigen 75 (Ly75), mRNA [NM_013825]                                                                        | 0.41                  | 0.041   | 0.506           |
| chr9:36509939-36515389_F                    | chr9:36509939-36515389_F   | lincRNA:chr9:36509939-36515389 forward strand                                                                                           | 0.41                  | 0.045   | 0.513           |
| chr17:38132217-38157667_R                   | chr17:38132217-38157667_R  | lincRNA:chr17:38132217-38157667 reverse strand                                                                                          | 0.41                  | 0.032   | 0.484           |
| chr2:71585563-71588257_R                    | chr2:71585563-71588257_R   | lincRNA:chr2:71585563-71588257 reverse strand                                                                                           | 0.41                  | 0.012   | 0.409           |
| ENSMUST00000108084                          | ENSMUST00000108084         | ens  androgen binding protein beta Gene [Source:MGI (curated);Acc:MGI:87863] [ENSMUST00000108084]                                       | 0.41                  | 0.036   | 0.495           |
| chr8:74473445-74496948_R                    | chr8:74473445-74496948_R   | lincRNA:chr8:74473445-74496948 reverse strand                                                                                           | 0.41                  | 0.014   | 0.414           |
| Sdcbp2                                      | NM_145535                  | ref  Mus musculus syndecan binding protein (syntenin) 2 (Sdcbp2), mRNA [NM_145535]                                                      | 0.41                  | 0.048   | 0.516           |
| LOC100045524                                | XR_031754                  | ref  PREDICTED: Mus musculus similar to RNP particle component (LOC100045524), misc RNA [XR_031754]                                     | 0.41                  | 0.013   | 0.412           |
| Serpina4-ps1                                | BC031891                   | gb  Mus musculus serine (or cysteine) peptidase inhibitor, clade A, member 4, pseudogene 1, mRNA (cDNA clone IMAGE:5123840). [BC031891] | 0.41                  | 0.014   | 0.418           |
| chr13:28477490-28985604_F                   | chr13:28477490-28985604_F  | lincRNA:chr13:28477490-28985604 forward strand                                                                                          | 0.41                  | 0.037   | 0.496           |
| Sag                                         | NM_009118                  | ref  Mus musculus retinal S-antigen (Sag), mRNA [NM_009118]                                                                             | 0.41                  | 0.042   | 0.508           |
| chr13:94185501-94185936_F                   | chr13:94185501-94185936_F  | lincRNA:chr13:94185501-94185936 forward strand                                                                                          | 0.41                  | 0.033   | 0.489           |
| chr3:41143423-41359623_F                    | chr3:41143423-41359623_F   | lincRNA:chr3:41143423-41359623 forward strand                                                                                           | 0.41                  | 0.040   | 0.501           |
| Per3                                        | NM_011067                  | ref  Mus musculus period homolog 3 (Drosophila) (Per3), mRNA [NM_011067]                                                                | 0.41                  | 0.034   | 0.491           |
| chr18:46646048-46659873_R                   | chr18:46646048-46659873_R  | lincRNA:chr18:46646048-46659873 reverse strand                                                                                          | 0.41                  | 0.026   | 0.470           |
| chr6:120670699-120677449_F                  | chr6:120670699-120677449_F | lincRNA:chr6:120670699-120677449 forward strand                                                                                         | 0.41                  | 0.046   | 0.513           |
| Dpyd                                        | NM_170778                  | ref  Mus musculus dihydropyrimidine dehydrogenase (Dpyd), mRNA [NM_170778]                                                              | 0.41                  | 0.050   | 0.520           |
| chr1:72297489-72298058_R                    | chr1:72297489-72298058_R   | lincRNA:chr1:72297489-72298058 reverse strand                                                                                           | 0.41                  | 0.037   | 0.496           |
| chr4:140609589-140614789_F                  | chr4:140609589-140614789_F | lincRNA:chr4:140609589-140614789 forward strand                                                                                         | 0.41                  | 0.006   | 0.369           |
| ENSMUST00000110220                          | ENSMUST00000110220         | ens  tubulin tyrosine ligase-like family, member 5 Gene [Source:MGI (curated);Acc:MGI:2443657] [ENSMUST00000110220]                     | 0.41                  | 0.010   | 0.400           |
| ENSMUST00000100384                          | ENSMUST00000100384         | ens  nebullette Gene [Source:MGI (curated);Acc:MGI:1921353] [ENSMUST00000100384]                                                        | 0.41                  | 0.014   | 0.418           |
| chr1:84947500-85045150_R                    | chr1:84947500-85045150_R   | lincRNA:chr1:84947500-85045150 reverse strand                                                                                           | 0.41                  | 0.039   | 0.500           |
| chr8:18895366-18925423_F                    | chr8:18895366-18925423_F   | lincRNA:chr8:18895366-18925423 forward strand                                                                                           | 0.41                  | 0.003   | 0.303           |
| Lce1g                                       | NM_025413                  | ref  Mus musculus late cornified envelope 1G (Lce1g), mRNA [NM_025413]                                                                  | 0.41                  | 0.041   | 0.505           |
| Gm8780                                      | XM_992017                  | ref  PREDICTED: Mus musculus predicted gene, EG667718 (EG667718), mRNA [XM_992017]                                                      | 0.41                  | 0.011   | 0.407           |

Online Supplemental Table IV: mG4H-STZ Only

| Gene Symbol                 | RefSeq                      | Description                                                                                                                    | logFC<br>mG4H-<br>STZ | P-value | Adj.<br>P-value |
|-----------------------------|-----------------------------|--------------------------------------------------------------------------------------------------------------------------------|-----------------------|---------|-----------------|
| chr10:24269165-24276690_F   | chr10:24269165-24276690_F   | lincRNA:chr10:24269165-24276690 forward strand                                                                                 | 0.41                  | 0.017   | 0.429           |
| chr5:106982442-107045717_R  | chr5:106982442-107045717_R  | lincRNA:chr5:106982442-107045717 reverse strand                                                                                | 0.41                  | 0.035   | 0.494           |
| Brd7                        | ENSMUST00000034085          | ens bromodomain containing 7 Gene [Source:MGI (curated);Acc:MGI:1349766] [ENSMUST00000034085]                                  | 0.41                  | 0.025   | 0.467           |
| chr4:101010948-101032148_F  | chr4:101010948-101032148_F  | lincRNA:chr4:101010948-101032148 forward strand                                                                                | 0.41                  | 0.035   | 0.494           |
| Raet1c                      | NM_009018                   | ref Mus musculus retinoic acid early transcript gamma (Raet1c), mRNA [NM_009018]                                               | 0.41                  | 0.040   | 0.501           |
| chr11:97457180-97487074_F   | chr11:97457180-97487074_F   | lincRNA:chr11:97457180-97487074 forward strand                                                                                 | 0.41                  | 0.024   | 0.463           |
| Olf272                      | NM_146839                   | ref Mus musculus olfactory receptor 272 (Olf272), mRNA [NM_146839]                                                             | 0.41                  | 0.026   | 0.470           |
| chr9:58301467-58323783_F    | chr9:58301467-58323783_F    | lincRNA:chr9:58301467-58323783 forward strand                                                                                  | 0.41                  | 0.040   | 0.502           |
| Slc39a5                     | NM_028051                   | ref Mus musculus solute carrier family 39 (metal ion transporter), member 5 (Slc39a5), transcript variant 1, mRNA [NM_028051]  | 0.41                  | 0.046   | 0.513           |
| ENSMUST00000060651          | ENSMUST00000060651          | ens claudin 7 Gene [Source:MGI (curated);Acc:MGI:1859285] [ENSMUST00000060651]                                                 | 0.41                  | 0.023   | 0.457           |
| Gm9804                      | ENSMUST00000056234          | ens Putative uncharacterized protein Fragment [Source:UniProtKB/TrEMBL;Acc:Q8BV68] [ENSMUST00000056234]                        | 0.41                  | 0.020   | 0.446           |
| ENSMUST00000058494          | ENSMUST00000058494          | ens RIKEN cDNA 5830453K13 gene Gene [Source:MGI Symbol;Acc:MGI:1923326] [ENSMUST00000058494]                                   | 0.41                  | 0.009   | 0.400           |
| chr8:44232164-44266991_R    | chr8:44232164-44266991_R    | lincRNA:chr8:44232164-44266991 reverse strand                                                                                  | 0.41                  | 0.025   | 0.463           |
| chr3:95443575-95462543_R    | chr3:95443575-95462543_R    | lincRNA:chr3:95443575-95462543 reverse strand                                                                                  | 0.41                  | 0.023   | 0.456           |
| AB041803                    | XR_035177                   | ref PREDICTED: Mus musculus cDNA sequence AB041803 (AB041803), misc RNA [XR_035177]                                            | 0.41                  | 0.046   | 0.514           |
| 4930583H14Rik               | NM_026358                   | ref Mus musculus RIKEN cDNA 4930583H14 gene (4930583H14Rik), transcript variant 1, mRNA [NM_026358]                            | 0.41                  | 0.034   | 0.493           |
| Ppm1b                       | NM_001159497                | ref Mus musculus protein phosphatase 1B, magnesium dependent, beta isoform (Ppm1b), transcript variant 3, mRNA [NM_001159497]  | 0.41                  | 0.041   | 0.506           |
| chr14:43418592-43428090_F   | chr14:43418592-43428090_F   | lincRNA:chr14:43418592-43428090 forward strand                                                                                 | 0.41                  | 0.030   | 0.477           |
| LOC100046038                | XM_001475445                | ref PREDICTED: Mus musculus similar to sphingomyelin phosphodiesterase 3, neutral membrane (LOC100046038), mRNA [XM_001475445] | 0.41                  | 0.047   | 0.515           |
| Arih1                       | NM_019927                   | ref Mus musculus ariadne ubiquitin-conjugating enzyme E2 binding protein homolog 1 (Drosophila) (Arih1), mRNA [NM_019927]      | 0.40                  | 0.014   | 0.414           |
| LOC100046546                | XR_032715                   | ref PREDICTED: Mus musculus similar to IgM (kappa)light-chain (LOC100046546), misc RNA [XR_032715]                             | 0.40                  | 0.038   | 0.499           |
| chr12:50490638-50508093_F   | chr12:50490638-50508093_F   | lincRNA:chr12:50490638-50508093 forward strand                                                                                 | 0.40                  | 0.029   | 0.477           |
| Lcat                        | NM_008490                   | ref Mus musculus lecithin cholesterol acyltransferase (Lcat), mRNA [NM_008490]                                                 | 0.40                  | 0.012   | 0.412           |
| chr13:112717680-112733330_F | chr13:112717680-112733330_F | lincRNA:chr13:112717680-112733330 forward strand                                                                               | 0.40                  | 0.050   | 0.519           |
| LOC631360                   | XM_905140                   | ref PREDICTED: Mus musculus similar to V2r2 protein (LOC631360), mRNA [XM_905140]                                              | 0.40                  | 0.036   | 0.495           |

| Online Supplemental Table IV: mG4H-STZ Only |                            |                                                                                                                                                       |                       |         |                 |
|---------------------------------------------|----------------------------|-------------------------------------------------------------------------------------------------------------------------------------------------------|-----------------------|---------|-----------------|
| Gene Symbol                                 | RefSeq                     | Description                                                                                                                                           | logFC<br>mG4H-<br>STZ | P-value | Adj.<br>P-value |
| chr4:141100989-141106639_R                  | chr4:141100989-141106639_R | lincRNA:chr4:141100989-141106639 reverse strand                                                                                                       | 0.40                  | 0.011   | 0.407           |
| chr14:65433420-65434061_R                   | chr14:65433420-65434061_R  | lincRNA:chr14:65433420-65434061 reverse strand                                                                                                        | 0.40                  | 0.033   | 0.487           |
| chr1:40113912-40114565_R                    | chr1:40113912-40114565_R   | lincRNA:chr1:40113912-40114565 reverse strand                                                                                                         | 0.40                  | 0.035   | 0.494           |
| Por                                         | NM_008898                  | ref  Mus musculus P450 (cytochrome) oxidoreductase (Por), mRNA [NM_008898]                                                                            | 0.40                  | 0.021   | 0.447           |
| chr14:21437920-21464655_F                   | chr14:21437920-21464655_F  | lincRNA:chr14:21437920-21464655 forward strand                                                                                                        | 0.40                  | 0.049   | 0.519           |
| Gstm1                                       | NM_010358                  | ref  Mus musculus glutathione S-transferase, mu 1 (Gstm1), mRNA [NM_010358]                                                                           | 0.40                  | 0.032   | 0.486           |
| Abca15                                      | NM_177213                  | ref  Mus musculus ATP-binding cassette, sub-family A (ABC1), member 15 (Abca15), mRNA [NM_177213]                                                     | 0.40                  | 0.046   | 0.513           |
| Tmc6                                        | NM_145439                  | ref  Mus musculus transmembrane channel-like gene family 6 (Tmc6), transcript variant 1, mRNA [NM_145439]                                             | 0.40                  | 0.039   | 0.501           |
| chr6:86477309-86537554_R                    | chr6:86477309-86537554_R   | lincRNA:chr6:86477309-86537554 reverse strand                                                                                                         | 0.40                  | 0.016   | 0.428           |
| LOC100047512                                | XM_001478308               | ref  PREDICTED: Mus musculus hypothetical protein LOC100047512 (LOC100047512), mRNA [XM_001478308]                                                    | 0.40                  | 0.028   | 0.474           |
| Plcd4                                       | NM_148937                  | ref  Mus musculus phospholipase C, delta 4 (Plcd4), transcript variant 2, mRNA [NM_148937]                                                            | 0.40                  | 0.048   | 0.517           |
| Zkscan17                                    | NM_172941                  | ref  Mus musculus zinc finger with KRAB and SCAN domains 17 (Zkscan17), transcript variant 1, mRNA [NM_172941]                                        | 0.40                  | 0.046   | 0.513           |
| Wfikkn2                                     | NM_181819                  | ref  Mus musculus WAP, follistatin/kazal, immunoglobulin, kunitz and netrin domain containing 2 (Wfikkn2), mRNA [NM_181819]                           | 0.40                  | 0.016   | 0.425           |
| chr1:186560855-186563399_F                  | chr1:186560855-186563399_F | lincRNA:chr1:186560855-186563399 forward strand                                                                                                       | 0.40                  | 0.040   | 0.504           |
| chrX:91668178-91668700_R                    | chrX:91668178-91668700_R   | lincRNA:chrX:91668178-91668700 reverse strand                                                                                                         | 0.40                  | 0.032   | 0.485           |
| chr4:88745770-88774130_R                    | chr4:88745770-88774130_R   | lincRNA:chr4:88745770-88774130 reverse strand                                                                                                         | 0.40                  | 0.031   | 0.482           |
| Gm6249                                      | XM_896571                  | ref  PREDICTED: Mus musculus predicted gene, EG621677 (EG621677), mRNA [XM_896571]                                                                    | 0.40                  | 0.032   | 0.485           |
| Aire                                        | NM_009646                  | ref  Mus musculus autoimmune regulator (autoimmune polyendocrinopathy candidiasis ectodermal dystrophy) (Aire), mRNA [NM_009646]                      | 0.40                  | 0.010   | 0.401           |
| 1300014J16Rik                               | AK005005                   | gb  Mus musculus adult male liver cDNA, RIKEN full-length enriched library, clone:1300014J16 product:unclassifiable, full insert sequence. [AK005005] | 0.40                  | 0.024   | 0.458           |
| Cldn10a                                     | NM_021386                  | ref  Mus musculus claudin 10A (Cldn10a), transcript variant b, mRNA [NM_021386]                                                                       | 0.40                  | 0.040   | 0.504           |
| chr2:150217425-150266600_F                  | chr2:150217425-150266600_F | lincRNA:chr2:150217425-150266600 forward strand                                                                                                       | 0.40                  | 0.032   | 0.483           |
| Tmem55b                                     | NM_001033271               | ref  Mus musculus transmembrane protein 55b (Tmem55b), mRNA [NM_001033271]                                                                            | 0.40                  | 0.049   | 0.519           |
| Nfe2                                        | NM_008685                  | ref  Mus musculus nuclear factor, erythroid derived 2 (Nfe2), mRNA [NM_008685]                                                                        | 0.40                  | 0.038   | 0.499           |
| G6pc                                        | NM_008061                  | ref  Mus musculus glucose-6-phosphatase, catalytic (G6pc), mRNA [NM_008061]                                                                           | 0.40                  | 0.022   | 0.452           |
| chr4:149383134-149451259_R                  | chr4:149383134-149451259_R | lincRNA:chr4:149383134-149451259 reverse strand                                                                                                       | 0.40                  | 0.017   | 0.435           |
| chr12:72103832-72116875_F                   | chr12:72103832-72116875_F  | lincRNA:chr12:72103832-72116875 forward strand                                                                                                        | 0.40                  | 0.032   | 0.484           |



| Online Supplemental Table IV: mG4H-STZ Only |                            |                                                                                                                                 |                       |         |                 |
|---------------------------------------------|----------------------------|---------------------------------------------------------------------------------------------------------------------------------|-----------------------|---------|-----------------|
| Gene Symbol                                 | RefSeq                     | Description                                                                                                                     | logFC<br>mG4H-<br>STZ | P-value | Adj.<br>P-value |
| Vmn2r72-ps                                  | NM_001105185               | ref Mus musculus vomeronasal 2, receptor 72, pseudogene (Vmn2r72-ps), mRNA [NM_001105185]                                       | 0.40                  | 0.045   | 0.513           |
| Gm3374                                      | XM_001474514               | ref PREDICTED: Mus musculus hypothetical protein LOC100045222 (LOC100045222), mRNA [XM_001474514]                               | 0.40                  | 0.019   | 0.441           |
| Prr19                                       | NM_001081294               | ref Mus musculus proline rich 19 (Prr19), mRNA [NM_001081294]                                                                   | 0.40                  | 0.014   | 0.418           |
| Tekt1                                       | NM_011569                  | ref Mus musculus tektin 1 (Tekt1), mRNA [NM_011569]                                                                             | 0.39                  | 0.047   | 0.515           |
| Krtap12-1                                   | NM_010670                  | ref Mus musculus keratin associated protein 12-1 (Krtap12-1), mRNA [NM_010670]                                                  | 0.39                  | 0.034   | 0.491           |
| chr7:134643616-134651441_F                  | chr7:134643616-134651441_F | lincRNA:chr7:134643616-134651441 forward strand                                                                                 | 0.39                  | 0.024   | 0.457           |
| Rbmy1a1                                     | NM_011253                  | ref Mus musculus RNA binding motif protein, Y chromosome, family 1, member A1 (Rbmy1a1), transcript variant 1, mRNA [NM_011253] | 0.39                  | 0.004   | 0.314           |
| chr8:94841965-94881130_R                    | chr8:94841965-94881130_R   | lincRNA:chr8:94841965-94881130 reverse strand                                                                                   | 0.39                  | 0.009   | 0.398           |
| chr6:35441848-35450830_R                    | chr6:35441848-35450830_R   | lincRNA:chr6:35441848-35450830 reverse strand                                                                                   | 0.39                  | 0.029   | 0.477           |
| chr1:138477829-138478580_F                  | chr1:138477829-138478580_F | lincRNA:chr1:138477829-138478580 forward strand                                                                                 | 0.39                  | 0.025   | 0.464           |
| Gm3570                                      | XM_001477184               | ref PREDICTED: Mus musculus hypothetical protein LOC100041901 (LOC100041901), mRNA [XM_001477184]                               | 0.39                  | 0.014   | 0.412           |
| chr8:60132300-60146830_R                    | chr8:60132300-60146830_R   | lincRNA:chr8:60132300-60146830 reverse strand                                                                                   | 0.39                  | 0.038   | 0.499           |
| Gm11787                                     | XM_984338                  | ref PREDICTED: Mus musculus similar to Yamaguchi sarcoma viral (v-yes-1) oncogene homolog (LOC666513), mRNA [XM_984338]         | 0.39                  | 0.032   | 0.485           |
| Maml3                                       | NM_001004176               | ref Mus musculus mastermind like 3 (Drosophila) (Maml3), mRNA [NM_001004176]                                                    | 0.39                  | 0.019   | 0.439           |
| 2810410D24Rik                               | CB194565                   | gb AGENCOURT_11259907 NIH_MGC_135 Mus musculus cDNA clone IMAGE:30135997 5', mRNA sequence [CB194565]                           | 0.39                  | 0.018   | 0.435           |
| Ccdc148                                     | NM_001001178               | ref Mus musculus coiled-coil domain containing 148 (Ccdc148), mRNA [NM_001001178]                                               | 0.39                  | 0.040   | 0.504           |
| Usp54                                       | NM_030180                  | ref Mus musculus ubiquitin specific peptidase 54 (Usp54), mRNA [NM_030180]                                                      | 0.39                  | 0.048   | 0.518           |
| chr16:64796849-64843249_R                   | chr16:64796849-64843249_R  | lincRNA:chr16:64796849-64843249 reverse strand                                                                                  | 0.39                  | 0.017   | 0.429           |
| chr3:152810906-152815072_R                  | chr3:152810906-152815072_R | lincRNA:chr3:152810906-152815072 reverse strand                                                                                 | 0.39                  | 0.049   | 0.518           |
| Pde3a                                       | ENSMUST00000043259         | ens phosphodiesterase 3A, cGMP inhibited Gene [Source:MGI Symbol;Acc:MGI:1860764] [ENSMUST00000043259]                          | 0.39                  | 0.020   | 0.443           |
| chr3:35782698-35789932_F                    | chr3:35782698-35789932_F   | lincRNA:chr3:35782698-35789932 forward strand                                                                                   | 0.39                  | 0.033   | 0.487           |
| Vmn1r82                                     | NM_134234                  | ref Mus musculus vomeronasal 1 receptor 82 (Vmn1r82), mRNA [NM_134234]                                                          | 0.39                  | 0.022   | 0.452           |
| chr8:67542714-67561694_F                    | chr8:67542714-67561694_F   | lincRNA:chr8:67542714-67561694 forward strand                                                                                   | 0.39                  | 0.006   | 0.369           |
| Ankrd16                                     | BC116230                   | gb Mus musculus ankyrin repeat domain 16, mRNA (cDNA clone MGC:143639 IMAGE:40091582), complete cds. [BC116230]                 | 0.39                  | 0.044   | 0.511           |
| Syncrip                                     | NM_019666                  | ref Mus musculus synaptotagmin binding, cytoplasmic RNA interacting protein (Syncrip), transcript variant 1, mRNA [NM_019666]   | 0.39                  | 0.042   | 0.507           |

Online Supplemental Table IV: mG4H-STZ Only

| Gene Symbol                | RefSeq                     | Description                                                                                                                                                   | logFC<br>mG4H-<br>STZ | P-value | Adj.<br>P-value |
|----------------------------|----------------------------|---------------------------------------------------------------------------------------------------------------------------------------------------------------|-----------------------|---------|-----------------|
| chr4:3745750-3756200_R     | chr4:3745750-3756200_R     | lincRNA:chr4:3745750-3756200 reverse strand                                                                                                                   | 0.39                  | 0.041   | 0.507           |
| Lrrc8c                     | NM_133897                  | ref  Mus musculus leucine rich repeat containing 8 family, member C (Lrrc8c), mRNA [NM_133897]                                                                | 0.39                  | 0.047   | 0.515           |
| Gm4171                     | XM_001479314               | ref  PREDICTED: Mus musculus similar to reproductive homeobox on X chromosome 8 (LOC100043014), mRNA [XM_001479314]                                           | 0.39                  | 0.027   | 0.471           |
| Clec18a                    | NM_181549                  | ref  Mus musculus C-type lectin domain family 18, member A (Clec18a), mRNA [NM_181549]                                                                        | 0.39                  | 0.046   | 0.513           |
| Bspry                      | NM_138653                  | ref  Mus musculus B-box and SPRY domain containing (Bspry), mRNA [NM_138653]                                                                                  | 0.38                  | 0.010   | 0.404           |
| Defb45                     | NM_001037752               | ref  Mus musculus defensin beta 45 (Defb45), mRNA [NM_001037752]                                                                                              | 0.38                  | 0.029   | 0.477           |
| Acer2                      | NM_139306                  | ref  Mus musculus alkaline ceramidase 2 (Acer2), mRNA [NM_139306]                                                                                             | 0.38                  | 0.017   | 0.433           |
| Olfir71                    | NM_019486                  | ref  Mus musculus olfactory receptor 71 (Olfir71), mRNA [NM_019486]                                                                                           | 0.38                  | 0.011   | 0.407           |
| Pgap1                      | NM_001163314               | ref  Mus musculus post-GPI attachment to proteins 1 (Pgap1), mRNA [NM_001163314]                                                                              | 0.38                  | 0.005   | 0.349           |
| D930030O05Rik              | AK083489                   | gb  Mus musculus 9 days embryo whole body cDNA, RIKEN full-length enriched library, clone:D030028K24 product:unclassifiable, full insert sequence. [AK083489] | 0.38                  | 0.044   | 0.513           |
| chrX:102222494-102267068_F | chrX:102222494-102267068_F | lincRNA:chrX:102222494-102267068 forward strand                                                                                                               | 0.38                  | 0.048   | 0.516           |
| Nrip1                      | ENSMUST00000121927         | ens  nuclear receptor interacting protein 1 Gene [Source:MGI (curated);Acc:MGI:1315213] [ENSMUST00000121927]                                                  | 0.38                  | 0.038   | 0.499           |
| chrX:47893703-47996700_R   | chrX:47893703-47996700_R   | lincRNA:chrX:47893703-47996700 reverse strand                                                                                                                 | 0.38                  | 0.049   | 0.519           |
| Gm2058                     | NM_001170345               | ref  Mus musculus predicted gene 2058 (Gm2058), mRNA [NM_001170345]                                                                                           | 0.38                  | 0.006   | 0.369           |
| Tcfap2a                    | NM_001122948               | ref  Mus musculus transcription factor AP-2, alpha (Tcfap2a), transcript variant 2, mRNA [NM_001122948]                                                       | 0.38                  | 0.026   | 0.470           |
| LOC100047604               | XM_001478488               | ref  PREDICTED: Mus musculus similar to Clast3 protein (LOC100047604), mRNA [XM_001478488]                                                                    | 0.38                  | 0.044   | 0.512           |
| LOC100048004               | XM_001479320               | ref  PREDICTED: Mus musculus hypothetical protein LOC100048004 (LOC100048004), mRNA [XM_001479320]                                                            | 0.38                  | 0.043   | 0.509           |
| chr7:46745641-46755766_R   | chr7:46745641-46755766_R   | lincRNA:chr7:46745641-46755766 reverse strand                                                                                                                 | 0.38                  | 0.046   | 0.513           |
| LOC621118                  | XR_030903                  | ref  PREDICTED: Mus musculus similar to family with sequence similarity 58, member A (LOC621118), misc RNA [XR_030903]                                        | 0.38                  | 0.024   | 0.458           |
| 4930538K18Rik              | NM_029198                  | ref  Mus musculus RIKEN cDNA 4930538K18 gene (4930538K18Rik), mRNA [NM_029198]                                                                                | 0.38                  | 0.037   | 0.496           |
| Olfir488                   | NM_146732                  | ref  Mus musculus olfactory receptor 488 (Olfir488), mRNA [NM_146732]                                                                                         | 0.38                  | 0.022   | 0.452           |
| Nfe2l1                     | NM_008686                  | ref  Mus musculus nuclear factor, erythroid derived 2,-like 1 (Nfe2l1), transcript variant 1, mRNA [NM_008686]                                                | 0.38                  | 0.015   | 0.418           |
| ENSMUST00000114113         | ENSMUST00000114113         | ens  zinc finger and BTB domain containing 49 Gene [Source:MGI (curated);Acc:MGI:1922329] [ENSMUST00000114113]                                                | 0.38                  | 0.006   | 0.366           |
| Sh3rf1                     | NM_021506                  | ref  Mus musculus SH3 domain containing ring finger 1 (Sh3rf1), mRNA [NM_021506]                                                                              | 0.38                  | 0.027   | 0.471           |
| chr9:75316023-75344401_R   | chr9:75316023-75344401_R   | lincRNA:chr9:75316023-75344401 reverse strand                                                                                                                 | 0.38                  | 0.032   | 0.484           |

Online Supplemental Table IV: mG4H-STZ Only

| Gene Symbol                | RefSeq                     | Description                                                                                                                      | logFC<br>mG4H-<br>STZ | P-value | Adj.<br>P-value |
|----------------------------|----------------------------|----------------------------------------------------------------------------------------------------------------------------------|-----------------------|---------|-----------------|
| ENSMUST00000077055         | ENSMUST00000077055         | ens olfactory receptor 1025, pseudogene 1 Pseudogene [Source:MGI (curated);Acc:MGI:3030859] [ENSMUST00000077055]                 | 0.38                  | 0.040   | 0.501           |
| Gm4054                     | XM_001478985               | ref PREDICTED: Mus musculus hypothetical protein LOC100047906 (LOC100047906), mRNA [XM_001478985]                                | 0.38                  | 0.015   | 0.418           |
| chr1:87343550-87362900_F   | chr1:87343550-87362900_F   | lincRNA:chr1:87343550-87362900 forward strand                                                                                    | 0.38                  | 0.036   | 0.495           |
| ENSMUST00000103371         | ENSMUST00000103371         | gb Mus musculus anti-polycation monoclonal antibody, Ig light chain variable region mRNA, partial cds. [U78500]                  | 0.38                  | 0.044   | 0.512           |
| chr6:37630192-37682692_F   | chr6:37630192-37682692_F   | lincRNA:chr6:37630192-37682692 forward strand                                                                                    | 0.38                  | 0.046   | 0.513           |
| ENSMUST00000101405         | ENSMUST00000101405         | Unknown                                                                                                                          | 0.38                  | 0.028   | 0.474           |
| Arl13a                     | NM_028947                  | ref Mus musculus ADP-ribosylation factor-like 13A (Arl13a), mRNA [NM_028947]                                                     | 0.38                  | 0.049   | 0.519           |
| Zc3h4                      | NM_198631                  | ref Mus musculus zinc finger CCCH-type containing 4 (Zc3h4), mRNA [NM_198631]                                                    | 0.38                  | 0.036   | 0.495           |
| ENSMUST00000098759         | ENSMUST00000098759         | ens RIKEN cDNA 1700104A03 gene Gene [Source:MGI Symbol;Acc:MGI:1920817] [ENSMUST00000098759]                                     | 0.38                  | 0.026   | 0.470           |
| Vat1l                      | NM_173016                  | ref Mus musculus vesicle amine transport protein 1 homolog-like (T. californica) (Vat1l), mRNA [NM_173016]                       | 0.37                  | 0.035   | 0.495           |
| chr2:77146893-77155643_F   | chr2:77146893-77155643_F   | lincRNA:chr2:77146893-77155643 forward strand                                                                                    | 0.37                  | 0.039   | 0.500           |
| chr8:124355710-124401160_R | chr8:124355710-124401160_R | lincRNA:chr8:124355710-124401160 reverse strand                                                                                  | 0.37                  | 0.014   | 0.418           |
| Gm13508                    | XR_030902                  | ref PREDICTED: Mus musculus similar to ribosomal protein S3a (LOC435666), misc RNA [XR_030902]                                   | 0.37                  | 0.008   | 0.391           |
| Gpatch2                    | NM_026367                  | ref Mus musculus G patch domain containing 2 (Gpatch2), mRNA [NM_026367]                                                         | 0.37                  | 0.010   | 0.405           |
| chr1:138570107-138632310_R | chr1:138570107-138632310_R | lincRNA:chr1:138570107-138632310 reverse strand                                                                                  | 0.37                  | 0.045   | 0.513           |
| chr15:60656586-60685333_R  | chr15:60656586-60685333_R  | lincRNA:chr15:60656586-60685333 reverse strand                                                                                   | 0.37                  | 0.050   | 0.520           |
| chr12:33606225-33638225_F  | chr12:33606225-33638225_F  | lincRNA:chr12:33606225-33638225 forward strand                                                                                   | 0.37                  | 0.043   | 0.510           |
| Pik3ap1                    | NM_031376                  | ref Mus musculus phosphoinositide-3-kinase adaptor protein 1 (Pik3ap1), mRNA [NM_031376]                                         | 0.37                  | 0.049   | 0.519           |
| chr5:53931541-53945241_R   | chr5:53931541-53945241_R   | lincRNA:chr5:53931541-53945241 reverse strand                                                                                    | 0.37                  | 0.016   | 0.427           |
| Foxp1                      | NM_053202                  | ref Mus musculus forkhead box P1 (Foxp1), mRNA [NM_053202]                                                                       | 0.37                  | 0.046   | 0.513           |
| chr1:138442536-138521080_F | chr1:138442536-138521080_F | lincRNA:chr1:138442536-138521080 forward strand                                                                                  | 0.37                  | 0.042   | 0.508           |
| chr4:135896689-135918414_F | chr4:135896689-135918414_F | lincRNA:chr4:135896689-135918414 forward strand                                                                                  | 0.37                  | 0.049   | 0.519           |
| Grk1                       | NM_011881                  | ref Mus musculus G protein-coupled receptor kinase 1 (Grk1), mRNA [NM_011881]                                                    | 0.37                  | 0.010   | 0.400           |
| Insr                       | NM_010568                  | ref Mus musculus insulin receptor (Insr), mRNA [NM_010568]                                                                       | 0.37                  | 0.037   | 0.497           |
| chr12:76765238-76765739_R  | chr12:76765238-76765739_R  | lincRNA:chr12:76765238-76765739 reverse strand                                                                                   | 0.37                  | 0.032   | 0.485           |
| chr8:19887285-19889397_R   | chr8:19887285-19889397_R   | lincRNA:chr8:19887285-19889397 reverse strand                                                                                    | 0.37                  | 0.029   | 0.477           |
| Hecw2                      | NM_172655                  | ref Mus musculus HECT, C2 and WW domain containing E3 ubiquitin protein ligase 2 (Hecw2), transcript variant 2, mRNA [NM_172655] | 0.37                  | 0.034   | 0.491           |

Online Supplemental Table IV: mG4H-STZ Only

| Gene Symbol                 | RefSeq                      | Description                                                                                                                                                        | logFC<br>mG4H-<br>STZ | P-value | Adj.<br>P-value |
|-----------------------------|-----------------------------|--------------------------------------------------------------------------------------------------------------------------------------------------------------------|-----------------------|---------|-----------------|
| Slc35e4                     | NM_153142                   | ref  Mus musculus solute carrier family 35, member E4 (Slc35e4), mRNA [NM_153142]                                                                                  | 0.37                  | 0.046   | 0.513           |
| Gls                         | NM_001081081                | ref  Mus musculus glutaminase (Gls), nuclear gene encoding mitochondrial protein, transcript variant 1, mRNA [NM_001081081]                                        | 0.37                  | 0.015   | 0.418           |
| chr4:145593253-145594254_R  | chr4:145593253-145594254_R  | lincRNA:chr4:145593253-145594254 reverse strand                                                                                                                    | 0.37                  | 0.032   | 0.485           |
| chr11:22992716-23024484_R   | chr11:22992716-23024484_R   | lincRNA:chr11:22992716-23024484 reverse strand                                                                                                                     | 0.37                  | 0.035   | 0.495           |
| Itpril1                     | NM_001163527                | ref  Mus musculus inositol 1,4,5-triphosphate receptor interacting protein-like 1 (Itpril1), transcript variant 1, mRNA [NM_001163527]                             | 0.36                  | 0.012   | 0.408           |
| chr12:72103832-72116875_R   | chr12:72103832-72116875_R   | lincRNA:chr12:72103832-72116875 reverse strand                                                                                                                     | 0.36                  | 0.039   | 0.500           |
| chr8:41475940-41476460_F    | chr8:41475940-41476460_F    | lincRNA:chr8:41475940-41476460 forward strand                                                                                                                      | 0.36                  | 0.028   | 0.474           |
| St3gal1                     | NM_009177                   | ref  Mus musculus ST3 beta-galactoside alpha-2,3-sialyltransferase 1 (St3gal1), mRNA [NM_009177]                                                                   | 0.36                  | 0.025   | 0.463           |
| Rnase10                     | NM_029145                   | ref  Mus musculus ribonuclease, RNase A family, 10 (non-active) (Rnase10), transcript variant 1, mRNA [NM_029145]                                                  | 0.36                  | 0.020   | 0.442           |
| ENSMUST00000100697          | ENSMUST00000100697          | ref  PREDICTED: Mus musculus hypothetical LOC676390 (LOC676390), mRNA [XM_989725]                                                                                  | 0.36                  | 0.023   | 0.456           |
| ENSMUST00000056274          | ENSMUST00000056274          | ens  RIKEN cDNA C230013L11 gene Gene [Source:MGI Symbol;Acc:MGI:2442581] [ENSMUST00000056274]                                                                      | 0.36                  | 0.006   | 0.366           |
| LOC676101                   | XR_031492                   | ref  PREDICTED: Mus musculus similar to Hmgb1 protein (LOC676101), misc RNA [XR_031492]                                                                            | 0.36                  | 0.023   | 0.456           |
| Myo15                       | NM_010862                   | ref  Mus musculus myosin XV (Myo15), transcript variant 1, mRNA [NM_010862]                                                                                        | 0.36                  | 0.042   | 0.508           |
| Gm46                        | ENSMUST00000095451          | ref  PREDICTED: Mus musculus gene model 46, (NCBI) (Gm46), mRNA [XM_001478081]                                                                                     | 0.36                  | 0.039   | 0.500           |
| Clp1                        | NM_133840                   | ref  Mus musculus CLP1, cleavage and polyadenylation factor I subunit, homolog (S. cerevisiae) (Clp1), mRNA [NM_133840]                                            | 0.36                  | 0.042   | 0.508           |
| Urgcp                       | NM_001077661                | ref  Mus musculus upregulator of cell proliferation (Urgcp), nuclear gene encoding mitochondrial protein, transcript variant 2, mRNA [NM_001077661]                | 0.36                  | 0.014   | 0.413           |
| chr14:79724027-79729152_F   | chr14:79724027-79729152_F   | lincRNA:chr14:79724027-79729152 forward strand                                                                                                                     | 0.36                  | 0.038   | 0.499           |
| Ddx3x                       | NM_010028                   | ref  Mus musculus DEAD/H (Asp-Glu-Ala-Asp/His) box polypeptide 3, X-linked (Ddx3x), mRNA [NM_010028]                                                               | 0.36                  | 0.040   | 0.502           |
| chr12:55417150-55418002_R   | chr12:55417150-55418002_R   | lincRNA:chr12:55417150-55418002 reverse strand                                                                                                                     | 0.36                  | 0.046   | 0.513           |
| LOC100047822                | XM_001478931                | ref  PREDICTED: Mus musculus hypothetical protein LOC100047822 (LOC100047822), mRNA [XM_001478931]                                                                 | 0.36                  | 0.022   | 0.450           |
| 1700014B07Rik               | ENSMUST00000056627          | ens  RIKEN cDNA 1700014B07 gene Gene [Source:MGI Symbol;Acc:MGI:1919498] [ENSMUST00000056627]                                                                      | 0.36                  | 0.037   | 0.496           |
| chr10:126831225-126832253_F | chr10:126831225-126832253_F | lincRNA:chr10:126831225-126832253 forward strand                                                                                                                   | 0.36                  | 0.043   | 0.510           |
| LOC634091                   | ENSMUST00000141713          | ens  RIKEN cDNA 4932431P20 gene Gene [Source:MGI Symbol;Acc:MGI:2149781] [ENSMUST00000141713]                                                                      | 0.36                  | 0.047   | 0.515           |
| ENSMUST00000103323          | ENSMUST00000103323          | gb  Mus musculus clone 1-B4 immunoglobulin kappa light chain variable region mRNA, partial cds. [AF144972]                                                         | 0.36                  | 0.012   | 0.412           |
| 2810403G07Rik               | AK012974                    | gb  Mus musculus 10, 11 days embryo whole body cDNA, RIKEN full-length enriched library, clone:2810403G07 product:unclassifiable, full insert sequence. [AK012974] | 0.36                  | 0.023   | 0.456           |

| Online Supplemental Table IV: mG4H-STZ Only |                            |                                                                                                                         |                       |         |                 |
|---------------------------------------------|----------------------------|-------------------------------------------------------------------------------------------------------------------------|-----------------------|---------|-----------------|
| Gene Symbol                                 | RefSeq                     | Description                                                                                                             | logFC<br>mG4H-<br>STZ | P-value | Adj.<br>P-value |
| Krtap1-5                                    | NM_027157                  | ref  Mus musculus keratin associated protein 1-5 (Krtap1-5), mRNA [NM_027157]                                           | 0.36                  | 0.037   | 0.496           |
| chr8:27259077-27268252_F                    | chr8:27259077-27268252_F   | lincRNA:chr8:27259077-27268252 forward strand                                                                           | 0.36                  | 0.011   | 0.407           |
| chr18:38477934-38478445_F                   | chr18:38477934-38478445_F  | lincRNA:chr18:38477934-38478445 forward strand                                                                          | 0.36                  | 0.035   | 0.495           |
| E4f1                                        | NM_007893                  | ref  Mus musculus E4f transcription factor 1 (E4f1), mRNA [NM_007893]                                                   | 0.36                  | 0.040   | 0.502           |
| ENSMUST00000032858                          | ENSMUST00000032858         | ens  RIKEN cDNA 1700019G06 gene Gene [Source:MGI Symbol;Acc:MGI:1916654] [ENSMUST00000032858]                           | 0.36                  | 0.049   | 0.519           |
| Gm88                                        | NM_001111142               | ref  Mus musculus predicted gene 88 (Gm88), mRNA [NM_001111142]                                                         | 0.36                  | 0.008   | 0.393           |
| Eif1a                                       | NM_010120                  | ref  Mus musculus eukaryotic translation initiation factor 1A (Eif1a), mRNA [NM_010120]                                 | 0.36                  | 0.032   | 0.484           |
| Sept14                                      | NM_028826                  | ref  Mus musculus septin 14 (Sept14), mRNA [NM_028826]                                                                  | 0.36                  | 0.045   | 0.513           |
| 1700047A11Rik                               | XM_001478344               | ref  PREDICTED: Mus musculus RIKEN cDNA 1700047A11 gene (1700047A11Rik), mRNA [XM_001478344]                            | 0.36                  | 0.021   | 0.448           |
| ENSMUST00000100698                          | ENSMUST00000100698         | ref  PREDICTED: Mus musculus similar to CDNA sequence BC061237 (LOC100044625), mRNA [XM_001472731]                      | 0.35                  | 0.016   | 0.426           |
| LOC675608                                   | XM_994628                  | ref  PREDICTED: Mus musculus similar to putative integral membrane protein TMIE (LOC675608), mRNA [XM_994628]           | 0.35                  | 0.045   | 0.513           |
| Rreb1                                       | NR_033615                  | ref  Mus musculus ras responsive element binding protein 1 (Rreb1), transcript variant 5, non-coding RNA [NR_033615]    | 0.35                  | 0.042   | 0.507           |
| ENSMUST00000091059                          | ENSMUST00000091059         | ens  tetratricopeptide repeat domain 16 Gene [Source:MGI (curated);Acc:MGI:2443048] [ENSMUST00000091059]                | 0.35                  | 0.022   | 0.452           |
| Olf1494                                     | NM_146990                  | ref  Mus musculus olfactory receptor 1494 (Olf1494), mRNA [NM_146990]                                                   | 0.35                  | 0.034   | 0.493           |
| Chic1                                       | NM_009767                  | ref  Mus musculus cysteine-rich hydrophobic domain 1 (Chic1), mRNA [NM_009767]                                          | 0.35                  | 0.032   | 0.485           |
| chr19:7458725-7474825_F                     | chr19:7458725-7474825_F    | lincRNA:chr19:7458725-7474825 forward strand                                                                            | 0.35                  | 0.038   | 0.498           |
| Vmn1r167                                    | NM_001101562               | ref  Mus musculus vomeronasal 1 receptor 167 (Vmn1r167), mRNA [NM_001101562]                                            | 0.35                  | 0.039   | 0.499           |
| chr8:91569369-91594119_R                    | chr8:91569369-91594119_R   | lincRNA:chr8:91569369-91594119 reverse strand                                                                           | 0.35                  | 0.046   | 0.513           |
| chr2:157236070-157249445_R                  | chr2:157236070-157249445_R | lincRNA:chr2:157236070-157249445 reverse strand                                                                         | 0.35                  | 0.035   | 0.495           |
| chr5:115806200-115834425_F                  | chr5:115806200-115834425_F | lincRNA:chr5:115806200-115834425 forward strand                                                                         | 0.35                  | 0.026   | 0.470           |
| ENSMUST00000061860                          | ENSMUST00000061860         | ens  RIKEN cDNA 4930518F22 gene Gene [Source:MGI Symbol;Acc:MGI:1918905] [ENSMUST00000061860]                           | 0.35                  | 0.045   | 0.513           |
| Csrp2bp                                     | NM_181417                  | ref  Mus musculus cysteine and glycine-rich protein 2 binding protein (Csrp2bp), transcript variant 1, mRNA [NM_181417] | 0.35                  | 0.020   | 0.445           |
| ENSMUST00000089106                          | ENSMUST00000089106         | ens  Glycine tyrosine-rich hair keratin protein [Source:UniProtKB/TrEMBL;Acc:O08631] [ENSMUST00000089106]               | 0.35                  | 0.048   | 0.516           |
| chr5:22801058-22939737_F                    | chr5:22801058-22939737_F   | lincRNA:chr5:22801058-22939737 forward strand                                                                           | 0.35                  | 0.009   | 0.399           |
| Fam122b                                     | NM_030167                  | ref  Mus musculus family with sequence similarity 122, member B (Fam122b), transcript variant 2, mRNA [NM_030167]       | 0.35                  | 0.048   | 0.518           |

Online Supplemental Table IV: mG4H-STZ Only

| Gene Symbol                       | RefSeq                     | Description                                                                                                                                           | logFC<br>mG4H-<br>STZ | P-value | Adj.<br>P-value |
|-----------------------------------|----------------------------|-------------------------------------------------------------------------------------------------------------------------------------------------------|-----------------------|---------|-----------------|
| <b>Olfr506</b>                    | NM_001011871               | ref  Mus musculus olfactory receptor 506 (Olfr506), mRNA [NM_001011871]                                                                               | 0.35                  | 0.039   | 0.501           |
| <b>chr10:60473030-60535340_R</b>  | chr10:60473030-60535340_R  | lincRNA:chr10:60473030-60535340 reverse strand                                                                                                        | 0.35                  | 0.038   | 0.499           |
| <b>ENSMUST00000101687</b>         | ENSMUST00000101687         | ens  Putative uncharacterized protein [Source:UniProtKB/TrEMBL;Acc:Q3UUN3] [ENSMUST00000101687]                                                       | 0.35                  | 0.031   | 0.482           |
| <b>Fermt2</b>                     | NM_146054                  | ref  Mus musculus fermitin family homolog 2 (Drosophila) (Fermt2), mRNA [NM_146054]                                                                   | 0.35                  | 0.029   | 0.477           |
| <b>F830014O18Rik</b>              | AK089751                   | gb  Mus musculus activated spleen cDNA, RIKEN full-length enriched library, clone:F830014O18 product:unclassifiable, full insert sequence. [AK089751] | 0.35                  | 0.046   | 0.513           |
| <b>Gm7356</b>                     | XM_972876                  | ref  PREDICTED: Mus musculus predicted gene, EG664821 (EG664821), mRNA [XM_972876]                                                                    | 0.35                  | 0.029   | 0.477           |
| <b>chr12:52880692-52933444_R</b>  | chr12:52880692-52933444_R  | lincRNA:chr12:52880692-52933444 reverse strand                                                                                                        | 0.35                  | 0.035   | 0.495           |
| <b>chr16:4525147-4542122_F</b>    | chr16:4525147-4542122_F    | lincRNA:chr16:4525147-4542122 forward strand                                                                                                          | 0.35                  | 0.047   | 0.515           |
| <b>Igfb3</b>                      | NM_207205                  | ref  Mus musculus immunoglobulin superfamily, member 3 (Igfb3), mRNA [NM_207205]                                                                      | 0.35                  | 0.018   | 0.437           |
| <b>Smpx</b>                       | ENSMUST00000112520         | ens  small muscle protein, X-linked Gene [Source:MGI (curated);Acc:MGI:1913356] [ENSMUST00000112520]                                                  | 0.35                  | 0.030   | 0.478           |
| <b>Adcy6</b>                      | NM_007405                  | ref  Mus musculus adenylate cyclase 6 (Adcy6), mRNA [NM_007405]                                                                                       | 0.35                  | 0.035   | 0.495           |
| <b>chr3:93159107-93159613_F</b>   | chr3:93159107-93159613_F   | lincRNA:chr3:93159107-93159613 forward strand                                                                                                         | 0.35                  | 0.015   | 0.419           |
| <b>LOC636303</b>                  | XR_033307                  | ref  PREDICTED: Mus musculus similar to Coenzyme Q9 homolog (yeast) (LOC636303), misc RNA [XR_033307]                                                 | 0.35                  | 0.045   | 0.513           |
| <b>Kif9</b>                       | NM_001163569               | ref  Mus musculus kinesin family member 9 (Kif9), transcript variant 1, mRNA [NM_001163569]                                                           | 0.35                  | 0.030   | 0.477           |
| <b>Slc1a2</b>                     | NM_001077514               | ref  Mus musculus solute carrier family 1 (glial high affinity glutamate transporter), member 2 (Slc1a2), transcript variant 1, mRNA [NM_001077514]   | 0.35                  | 0.036   | 0.495           |
| <b>chr8:49911596-49912196_R</b>   | chr8:49911596-49912196_R   | lincRNA:chr8:49911596-49912196 reverse strand                                                                                                         | 0.35                  | 0.039   | 0.500           |
| <b>Rel2</b>                       | NM_153793                  | ref  Mus musculus RELT-like 2 (Rel2), mRNA [NM_153793]                                                                                                | 0.34                  | 0.016   | 0.427           |
| <b>Ceacam12</b>                   | NM_026087                  | ref  Mus musculus carcinoembryonic antigen-related cell adhesion molecule 12 (Ceacam12), transcript variant 1, mRNA [NM_026087]                       | 0.34                  | 0.032   | 0.483           |
| <b>AU019823</b>                   | NM_001134902               | ref  Mus musculus expressed sequence AU019823 (AU019823), transcript variant 1, mRNA [NM_001134902]                                                   | 0.34                  | 0.035   | 0.495           |
| <b>Six4</b>                       | NM_011382                  | ref  Mus musculus sine oculis-related homeobox 4 homolog (Drosophila) (Six4), mRNA [NM_011382]                                                        | 0.34                  | 0.047   | 0.514           |
| <b>Prps1l1</b>                    | NM_029294                  | ref  Mus musculus phosphoribosyl pyrophosphate synthetase 1-like 1 (Prps1l1), mRNA [NM_029294]                                                        | 0.34                  | 0.048   | 0.516           |
| <b>Art4</b>                       | NM_026639                  | ref  Mus musculus ADP-ribosyltransferase 4 (Art4), mRNA [NM_026639]                                                                                   | 0.34                  | 0.028   | 0.474           |
| <b>chr4:148119487-148121143_R</b> | chr4:148119487-148121143_R | lincRNA:chr4:148119487-148121143 reverse strand                                                                                                       | 0.34                  | 0.025   | 0.464           |
| <b>Tdgf1</b>                      | NM_011562                  | ref  Mus musculus teratocarcinoma-derived growth factor 1 (Tdgf1), mRNA [NM_011562]                                                                   | 0.34                  | 0.043   | 0.510           |
| <b>Gm4610</b>                     | XM_001479361               | ref  PREDICTED: Mus musculus hypothetical protein LOC100047914 (LOC100047914), mRNA [XM_001479361]                                                    | 0.34                  | 0.047   | 0.515           |
| <b>Inpp5f</b>                     | NM_178641                  | ref  Mus musculus inositol polyphosphate-5-phosphatase F (Inpp5f), mRNA [NM_178641]                                                                   | 0.34                  | 0.020   | 0.445           |



Online Supplemental Table IV: mG4H-STZ Only

| Gene Symbol                 | RefSeq                      | Description                                                                                                                                                         | logFC<br>mG4H-<br>STZ | P-value | Adj.<br>P-value |
|-----------------------------|-----------------------------|---------------------------------------------------------------------------------------------------------------------------------------------------------------------|-----------------------|---------|-----------------|
| Sirpb1a                     | NM_001002898                | ref Mus musculus signal-regulatory protein beta 1A (Sirpb1a), transcript variant 3, mRNA [NM_001002898]                                                             | 0.34                  | 0.045   | 0.513           |
| Gm2051                      | XM_001472400                | ref PREDICTED: Mus musculus hypothetical protein LOC100039117 (LOC100039117), mRNA [XM_001472400]                                                                   | 0.34                  | 0.006   | 0.369           |
| B230219N05Rik               | AK045665                    | gb Mus musculus adult male corpora quadrigemina cDNA, RIKEN full-length enriched library, clone:B230219N05 product:unclassifiable, full insert sequence. [AK045665] | 0.34                  | 0.031   | 0.482           |
| chr18:60891745-60896311_F   | chr18:60891745-60896311_F   | lincRNA:chr18:60891745-60896311 forward strand                                                                                                                      | 0.34                  | 0.020   | 0.442           |
| Zfp422                      | NM_026057                   | ref Mus musculus zinc finger protein 422 (Zfp422), mRNA [NM_026057]                                                                                                 | 0.34                  | 0.049   | 0.519           |
| Rsph3a                      | NM_025789                   | ref Mus musculus radial spoke 3A homolog (Chlamydomonas) (Rsph3a), mRNA [NM_025789]                                                                                 | 0.34                  | 0.031   | 0.483           |
| Hbs1l                       | NM_001145209                | ref Mus musculus Hbs1-like (S. cerevisiae) (Hbs1l), transcript variant 3, mRNA [NM_001145209]                                                                       | 0.34                  | 0.043   | 0.509           |
| chr1:90149027-90152254_F    | chr1:90149027-90152254_F    | lincRNA:chr1:90149027-90152254 forward strand                                                                                                                       | 0.34                  | 0.032   | 0.484           |
| ENSMUST00000103567          | ENSMUST00000103567          | ens TRAV1 Fragment [Source:UniProtKB/TrEMBL;Acc:Q5R1J0] [ENSMUST00000103567]                                                                                        | 0.34                  | 0.028   | 0.477           |
| ENSMUST00000097361          | ENSMUST00000097361          | ens RIKEN cDNA C130040N14 gene Gene [Source:MGI Symbol;Acc:MGI:3588257] [ENSMUST00000097361]                                                                        | 0.34                  | 0.016   | 0.425           |
| chr3:37543528-37546874_F    | chr3:37543528-37546874_F    | lincRNA:chr3:37543528-37546874 forward strand                                                                                                                       | 0.34                  | 0.037   | 0.498           |
| Harbi1                      | NM_178724                   | ref Mus musculus harbinger transposase derived 1 (Harbi1), mRNA [NM_178724]                                                                                         | 0.34                  | 0.038   | 0.499           |
| A730062M13Rik               | AK043165                    | gb Mus musculus 7 days neonate cerebellum cDNA, RIKEN full-length enriched library, clone:A730062M13 product:unclassifiable, full insert sequence. [AK043165]       | 0.33                  | 0.034   | 0.491           |
| Ccdc68                      | NM_201362                   | ref Mus musculus coiled-coil domain containing 68 (Ccdc68), mRNA [NM_201362]                                                                                        | 0.33                  | 0.050   | 0.520           |
| Ptpn2                       | NM_008977                   | ref Mus musculus protein tyrosine phosphatase, non-receptor type 2 (Ptpn2), transcript variant 1, mRNA [NM_008977]                                                  | 0.33                  | 0.023   | 0.455           |
| chr4:86267450-86277650_F    | chr4:86267450-86277650_F    | lincRNA:chr4:86267450-86277650 forward strand                                                                                                                       | 0.33                  | 0.016   | 0.426           |
| Gm4053                      | XM_001479457                | ref PREDICTED: Mus musculus hypothetical protein LOC100047878 (LOC100047878), mRNA [XM_001479457]                                                                   | 0.33                  | 0.035   | 0.494           |
| Ntsr1                       | NM_018766                   | ref Mus musculus neurotensin receptor 1 (Ntsr1), mRNA [NM_018766]                                                                                                   | 0.33                  | 0.041   | 0.505           |
| chr17:22045002-22046886_R   | chr17:22045002-22046886_R   | lincRNA:chr17:22045002-22046886 reverse strand                                                                                                                      | 0.33                  | 0.035   | 0.495           |
| Psors1c2                    | NM_020576                   | ref Mus musculus psoriasis susceptibility 1 candidate 2 (human) (Psors1c2), mRNA [NM_020576]                                                                        | 0.33                  | 0.016   | 0.426           |
| chr14:105987405-106063477_R | chr14:105987405-106063477_R | lincRNA:chr14:105987405-106063477 reverse strand                                                                                                                    | 0.33                  | 0.031   | 0.481           |
| chr11:51854060-51903278_F   | chr11:51854060-51903278_F   | lincRNA:chr11:51854060-51903278 forward strand                                                                                                                      | 0.33                  | 0.041   | 0.505           |
| ENSMUST00000114877          | ENSMUST00000114877          | ens poly (ADP-ribose) polymerase family, member 9 Gene [Source:MGI (curated);Acc:MGI:1933117] [ENSMUST00000114877]                                                  | 0.33                  | 0.032   | 0.484           |
| C230094B09Rik               | AK082713                    | gb Mus musculus 0 day neonate cerebellum cDNA, RIKEN full-length enriched library, clone:C230094B09 product:unclassifiable, full insert sequence. [AK082713]        | 0.33                  | 0.038   | 0.499           |

| Online Supplemental Table IV: mG4H-STZ Only |                            |                                                                                                                                                             |                       |         |                 |
|---------------------------------------------|----------------------------|-------------------------------------------------------------------------------------------------------------------------------------------------------------|-----------------------|---------|-----------------|
| Gene Symbol                                 | RefSeq                     | Description                                                                                                                                                 | logFC<br>mG4H-<br>STZ | P-value | Adj.<br>P-value |
| Csrp2bp                                     | NM_181417                  | ref Mus musculus cysteine and glycine-rich protein 2 binding protein (Csrp2bp), transcript variant 1, mRNA [NM_181417]                                      | 0.33                  | 0.031   | 0.483           |
| Anp32e                                      | NM_023210                  | ref Mus musculus acidic (leucine-rich) nuclear phosphoprotein 32 family, member E (Anp32e), mRNA [NM_023210]                                                | 0.33                  | 0.045   | 0.513           |
| chr3:138239464-138241728_R                  | chr3:138239464-138241728_R | lincRNA:chr3:138239464-138241728 reverse strand                                                                                                             | 0.33                  | 0.046   | 0.513           |
| chr9:106170918-106177894_F                  | chr9:106170918-106177894_F | lincRNA:chr9:106170918-106177894 forward strand                                                                                                             | 0.33                  | 0.040   | 0.502           |
| Rit2                                        | NM_009065                  | ref Mus musculus Ras-like without CAAX 2 (Rit2), mRNA [NM_009065]                                                                                           | 0.33                  | 0.018   | 0.435           |
| Stk32a                                      | NM_178749                  | ref Mus musculus serine/threonine kinase 32A (Stk32a), mRNA [NM_178749]                                                                                     | 0.33                  | 0.036   | 0.495           |
| chr12:73789535-73799787_R                   | chr12:73789535-73799787_R  | lincRNA:chr12:73789535-73799787 reverse strand                                                                                                              | 0.33                  | 0.030   | 0.480           |
| Tssk6                                       | NM_032004                  | ref Mus musculus testis-specific serine kinase 6 (Tssk6), mRNA [NM_032004]                                                                                  | 0.33                  | 0.038   | 0.499           |
| chr9:43921700-43939600_R                    | chr9:43921700-43939600_R   | lincRNA:chr9:43921700-43939600 reverse strand                                                                                                               | 0.33                  | 0.048   | 0.516           |
| Fbxw2                                       | NM_013890                  | ref Mus musculus F-box and WD-40 domain protein 2 (Fbxw2), transcript variant 1, mRNA [NM_013890]                                                           | 0.33                  | 0.023   | 0.453           |
| chr16:30170306-30223193_R                   | chr16:30170306-30223193_R  | lincRNA:chr16:30170306-30223193 reverse strand                                                                                                              | 0.33                  | 0.047   | 0.514           |
| chr12:4579206-4583562_R                     | chr12:4579206-4583562_R    | lincRNA:chr12:4579206-4583562 reverse strand                                                                                                                | 0.33                  | 0.035   | 0.494           |
| BC049730                                    | NM_199150                  | ref Mus musculus cDNA sequence BC049730 (BC049730), mRNA [NM_199150]                                                                                        | 0.33                  | 0.042   | 0.507           |
| chr2:181650800-181669350_F                  | chr2:181650800-181669350_F | lincRNA:chr2:181650800-181669350 forward strand                                                                                                             | 0.33                  | 0.016   | 0.428           |
| chr12:4581550-4599600_F                     | chr12:4581550-4599600_F    | lincRNA:chr12:4581550-4599600 forward strand                                                                                                                | 0.33                  | 0.027   | 0.472           |
| Fgf8                                        | NM_010205                  | ref Mus musculus fibroblast growth factor 8 (Fgf8), transcript variant 1, mRNA [NM_010205]                                                                  | 0.33                  | 0.045   | 0.513           |
| 9330133O14Rik                               | AK033985                   | gb Mus musculus adult male diencephalon cDNA, RIKEN full-length enriched library, clone:9330133O14 product:unclassifiable, full insert sequence. [AK033985] | 0.33                  | 0.032   | 0.485           |
| Ftmt                                        | NM_026286                  | ref Mus musculus ferritin mitochondrial (Ftmt), nuclear gene encoding mitochondrial protein, mRNA [NM_026286]                                               | 0.33                  | 0.019   | 0.437           |
| Wdr43                                       | NM_175639                  | ref Mus musculus WD repeat domain 43 (Wdr43), mRNA [NM_175639]                                                                                              | 0.33                  | 0.039   | 0.501           |
| Csrp2bp                                     | NM_181417                  | ref Mus musculus cysteine and glycine-rich protein 2 binding protein (Csrp2bp), transcript variant 1, mRNA [NM_181417]                                      | 0.33                  | 0.026   | 0.470           |
| Olfr281                                     | NM_146280                  | ref Mus musculus olfactory receptor 281 (Olfr281), mRNA [NM_146280]                                                                                         | 0.32                  | 0.038   | 0.499           |
| chr19:24978025-24988025_R                   | chr19:24978025-24988025_R  | lincRNA:chr19:24978025-24988025 reverse strand                                                                                                              | 0.32                  | 0.022   | 0.453           |
| chrX:12755425-12772575_R                    | chrX:12755425-12772575_R   | lincRNA:chrX:12755425-12772575 reverse strand                                                                                                               | 0.32                  | 0.018   | 0.435           |
| chr13:48576557-48581632_R                   | chr13:48576557-48581632_R  | lincRNA:chr13:48576557-48581632 reverse strand                                                                                                              | 0.32                  | 0.034   | 0.493           |
| ENSMUST00000097524                          | ENSMUST00000097524         | ens Putative uncharacterized protein [Source:UniProtKB/TrEMBL;Acc:Q3V055] [ENSMUST00000097524]                                                              | 0.32                  | 0.025   | 0.463           |

| Online Supplemental Table IV: mG4H-STZ Only |                             |                                                                                                                                                           |                       |         |                 |
|---------------------------------------------|-----------------------------|-----------------------------------------------------------------------------------------------------------------------------------------------------------|-----------------------|---------|-----------------|
| Gene Symbol                                 | RefSeq                      | Description                                                                                                                                               | logFC<br>mG4H-<br>STZ | P-value | Adj.<br>P-value |
| Slc39a6                                     | NM_139143                   | ref  Mus musculus solute carrier family 39 (metal ion transporter), member 6 (Slc39a6), mRNA [NM_139143]                                                  | 0.32                  | 0.014   | 0.412           |
| LOC100045212                                | XM_001473647                | ref  PREDICTED: Mus musculus similar to SIRP beta 1 like 1 protein (LOC100045212), mRNA [XM_001473647]                                                    | 0.32                  | 0.021   | 0.450           |
| chr7:16584852-16657252_F                    | chr7:16584852-16657252_F    | lincRNA:chr7:16584852-16657252 forward strand                                                                                                             | 0.32                  | 0.036   | 0.495           |
| chr10:117027298-117032998_F                 | chr10:117027298-117032998_F | lincRNA:chr10:117027298-117032998 forward strand                                                                                                          | 0.32                  | 0.022   | 0.452           |
| 593041619Rik                                | NR_027360                   | ref  Mus musculus RIKEN cDNA 593041619 gene (593041619Rik), transcript variant 1, non-coding RNA [NR_027360]                                              | 0.32                  | 0.025   | 0.465           |
| chr17:25990279-25998670_F                   | chr17:25990279-25998670_F   | lincRNA:chr17:25990279-25998670 forward strand                                                                                                            | 0.32                  | 0.036   | 0.495           |
| chr17:27445260-27455641_R                   | chr17:27445260-27455641_R   | lincRNA:chr17:27445260-27455641 reverse strand                                                                                                            | 0.32                  | 0.033   | 0.487           |
| Pla2g7                                      | NM_013737                   | ref  Mus musculus phospholipase A2, group VII (platelet-activating factor acetylhydrolase, plasma) (Pla2g7), mRNA [NM_013737]                             | 0.32                  | 0.023   | 0.456           |
| Dhx38                                       | NM_178380                   | ref  Mus musculus DEAH (Asp-Glu-Ala-His) box polypeptide 38 (Dhx38), mRNA [NM_178380]                                                                     | 0.32                  | 0.034   | 0.493           |
| Crtc2                                       | NM_028881                   | ref  Mus musculus CREB regulated transcription coactivator 2 (Crtc2), mRNA [NM_028881]                                                                    | 0.32                  | 0.041   | 0.506           |
| chr5:31883451-31884082_F                    | chr5:31883451-31884082_F    | lincRNA:chr5:31883451-31884082 forward strand                                                                                                             | 0.32                  | 0.032   | 0.483           |
| Gm4155                                      | XM_001478615                | ref  PREDICTED: Mus musculus hypothetical protein LOC100042993 (LOC100042993), mRNA [XM_001478615]                                                        | 0.32                  | 0.022   | 0.452           |
| 4930595D18Rik                               | ENSMUST00000121608          | ref  PREDICTED: Mus musculus RIKEN cDNA 4930595D18 gene (4930595D18Rik), mRNA [XM_001477231]                                                              | 0.32                  | 0.047   | 0.516           |
| Rock2                                       | NM_009072                   | ref  Mus musculus Rho-associated coiled-coil containing protein kinase 2 (Rock2), mRNA [NM_009072]                                                        | 0.32                  | 0.047   | 0.514           |
| Ttl19                                       | NM_029064                   | ref  Mus musculus tubulin tyrosine ligase-like family, member 9 (Ttl19), transcript variant 2, mRNA [NM_029064]                                           | 0.32                  | 0.019   | 0.439           |
| Fut10                                       | NM_134161                   | ref  Mus musculus fucosyltransferase 10 (Fut10), mRNA [NM_134161]                                                                                         | 0.32                  | 0.016   | 0.428           |
| Zbtb2                                       | NM_001033466                | ref  Mus musculus zinc finger and BTB domain containing 2 (Zbtb2), mRNA [NM_001033466]                                                                    | 0.32                  | 0.030   | 0.477           |
| Alk                                         | NM_007439                   | ref  Mus musculus anaplastic lymphoma kinase (Alk), mRNA [NM_007439]                                                                                      | 0.32                  | 0.039   | 0.501           |
| Tfpi                                        | NM_011576                   | ref  Mus musculus tissue factor pathway inhibitor (Tfpi), transcript variant 1, mRNA [NM_011576]                                                          | 0.32                  | 0.009   | 0.393           |
| Rock1                                       | NM_009071                   | ref  Mus musculus Rho-associated coiled-coil containing protein kinase 1 (Rock1), mRNA [NM_009071]                                                        | 0.32                  | 0.043   | 0.509           |
| chr8:27912000-27992750_F                    | chr8:27912000-27992750_F    | lincRNA:chr8:27912000-27992750 forward strand                                                                                                             | 0.31                  | 0.030   | 0.477           |
| ENSMUST00000092780                          | ENSMUST00000092780          | ens  carbonic anhydrase 10 Gene [Source:MGI (curated);Acc:MGI:1919855] [ENSMUST00000092780]                                                               | 0.31                  | 0.024   | 0.459           |
| Tbx5                                        | NM_011537                   | ref  Mus musculus T-box 5 (Tbx5), mRNA [NM_011537]                                                                                                        | 0.31                  | 0.040   | 0.502           |
| 2310061J03Rik                               | NR_027965                   | ref  Mus musculus RIKEN cDNA 2310061J03 gene (2310061J03Rik), non-coding RNA [NR_027965]                                                                  | 0.31                  | 0.027   | 0.472           |
| A430075N02                                  | AK079813                    | gb  Mus musculus 0 day neonate thymus cDNA, RIKEN full-length enriched library, clone:A430075N02 product:unclassifiable, full insert sequence. [AK079813] | 0.31                  | 0.044   | 0.512           |
| chr18:79286360-79304510_R                   | chr18:79286360-79304510_R   | lincRNA:chr18:79286360-79304510 reverse strand                                                                                                            | 0.31                  | 0.012   | 0.412           |

Online Supplemental Table IV: mG4H-STZ Only

| Gene Symbol                 | RefSeq                      | Description                                                                                                                                                 | logFC<br>mG4H-<br>STZ | P-value | Adj.<br>P-value |
|-----------------------------|-----------------------------|-------------------------------------------------------------------------------------------------------------------------------------------------------------|-----------------------|---------|-----------------|
| chr7:128400874-128439363_F  | chr7:128400874-128439363_F  | lincRNA:chr7:128400874-128439363 forward strand                                                                                                             | 0.31                  | 0.025   | 0.464           |
| AI836003                    | NM_177716                   | ref  Mus musculus expressed sequence AI836003 (AI836003), mRNA [NM_177716]                                                                                  | 0.31                  | 0.042   | 0.508           |
| Atn1                        | NM_007881                   | ref  Mus musculus atrophin 1 (Atn1), mRNA [NM_007881]                                                                                                       | 0.31                  | 0.048   | 0.516           |
| Pdk1                        | NM_172665                   | ref  Mus musculus pyruvate dehydrogenase kinase, isoenzyme 1 (Pdk1), nuclear gene encoding mitochondrial protein, mRNA [NM_172665]                          | 0.31                  | 0.022   | 0.452           |
| Stil                        | NM_009185                   | ref  Mus musculus Scf/Tal1 interrupting locus (Stil), mRNA [NM_009185]                                                                                      | 0.31                  | 0.045   | 0.513           |
| chr5:110261075-110376700_R  | chr5:110261075-110376700_R  | lincRNA:chr5:110261075-110376700 reverse strand                                                                                                             | 0.31                  | 0.025   | 0.466           |
| chr17:34003823-34011015_F   | chr17:34003823-34011015_F   | lincRNA:chr17:34003823-34011015 forward strand                                                                                                              | 0.31                  | 0.021   | 0.447           |
| ENSMUST00000127420          | ENSMUST00000127420          | ens  staufer (RNA binding protein) homolog 2 (Drosophila) Gene [Source:MGI (curated);Acc:MGI:1352508] [ENSMUST00000127420]                                  | 0.31                  | 0.041   | 0.505           |
| Trim43c                     | NM_001177858                | ref  Mus musculus tripartite motif-containing 43C (Trim43c), mRNA [NM_001177858]                                                                            | 0.31                  | 0.039   | 0.500           |
| Sgcd                        | NM_011891                   | ref  Mus musculus sarcoglycan, delta (dystrophin-associated glycoprotein) (Sgcd), mRNA [NM_011891]                                                          | 0.31                  | 0.015   | 0.420           |
| chr10:117021051-117038683_F | chr10:117021051-117038683_F | lincRNA:chr10:117021051-117038683 forward strand                                                                                                            | 0.31                  | 0.038   | 0.499           |
| Emb                         | NM_010330                   | ref  Mus musculus embigin (Emb), mRNA [NM_010330]                                                                                                           | 0.31                  | 0.042   | 0.507           |
| Gm2475                      | XM_001473718                | ref  PREDICTED: Mus musculus hypothetical protein LOC100039883 (LOC100039883), mRNA [XM_001473718]                                                          | 0.31                  | 0.025   | 0.464           |
| Iffo1                       | NM_001039669                | ref  Mus musculus intermediate filament family orphan 1 (Iffo1), transcript variant 1, mRNA [NM_001039669]                                                  | 0.31                  | 0.049   | 0.519           |
| chr12:111322030-111323387_F | chr12:111322030-111323387_F | lincRNA:chr12:111322030-111323387 forward strand                                                                                                            | 0.31                  | 0.022   | 0.452           |
| Gm5109                      | ENSMUST00000064781          | ref  PREDICTED: Mus musculus predicted gene, EG330129 (EG330129), mRNA [XM_284106]                                                                          | 0.31                  | 0.025   | 0.463           |
| Nt5c2                       | NM_029810                   | ref  Mus musculus 5'-nucleotidase, cytosolic II (Nt5c2), transcript variant 3, mRNA [NM_029810]                                                             | 0.30                  | 0.030   | 0.477           |
| ENSMUST00000095637          | ENSMUST00000095637          | ens  formyl peptide receptor, related sequence 7 Gene [Source:MGI Symbol;Acc:MGI:2448177] [ENSMUST00000095637]                                              | 0.30                  | 0.043   | 0.510           |
| ENSMUST00000101255          | ENSMUST00000101255          | ens  RIKEN cDNA 9230009I02 gene Gene [Source:MGI Symbol;Acc:MGI:3588229] [ENSMUST00000101255]                                                               | 0.30                  | 0.046   | 0.513           |
| chr14:99735346-99735699_R   | chr14:99735346-99735699_R   | lincRNA:chr14:99735346-99735699 reverse strand                                                                                                              | 0.30                  | 0.014   | 0.414           |
| chr4:57372663-57377164_R    | chr4:57372663-57377164_R    | lincRNA:chr4:57372663-57377164 reverse strand                                                                                                               | 0.30                  | 0.028   | 0.475           |
| Gm6352                      | XR_032364                   | ref  PREDICTED: Mus musculus similar to cyclin I (LOC622745), misc RNA [XR_032364]                                                                          | 0.30                  | 0.039   | 0.499           |
| LOC100046935                | XM_001477099                | ref  PREDICTED: Mus musculus similar to cyclic nucleotide gated channel beta 1 (LOC100046935), mRNA [XM_001477099]                                          | 0.30                  | 0.028   | 0.474           |
| LOC674543                   | XR_033362                   | ref  PREDICTED: Mus musculus similar to High mobility group box 1 (LOC674543), misc RNA [XR_033362]                                                         | 0.30                  | 0.036   | 0.495           |
| ENSMUST00000097644          | ENSMUST00000097644          | ens  histone deacetylase 4 Gene [Source:MGI Symbol;Acc:MGI:3036234] [ENSMUST00000097644]                                                                    | 0.30                  | 0.047   | 0.515           |
| ENSMUST00000035629          | ENSMUST00000035629          | gb  Mus musculus activated spleen cDNA, RIKEN full-length enriched library, clone:F830009N17 product:hypothetical protein, full insert sequence. [AK171768] | 0.30                  | 0.050   | 0.520           |

Online Supplemental Table IV: mG4H-STZ Only

| Gene Symbol                | RefSeq                     | Description                                                                                                                      | logFC<br>mG4H-<br>STZ | P-value | Adj.<br>P-value |
|----------------------------|----------------------------|----------------------------------------------------------------------------------------------------------------------------------|-----------------------|---------|-----------------|
| ENSMUST00000040638         | ENSMUST00000040638         | ens pre B-cell leukemia transcription factor 3 Gene [Source:MGI (curated);Acc:MGI:97496] [ENSMUST00000040638]                    | 0.30                  | 0.042   | 0.507           |
| chr14:77258025-77278750_R  | chr14:77258025-77278750_R  | lincRNA:chr14:77258025-77278750 reverse strand                                                                                   | 0.30                  | 0.037   | 0.496           |
| ENSMUST00000064032         | ENSMUST00000064032         | ens RIKEN cDNA 2010107H07 gene Gene [Source:MGI Symbol;Acc:MGI:1913737] [ENSMUST00000064032]                                     | 0.30                  | 0.015   | 0.418           |
| ENSMUST00000064287         | ENSMUST00000064287         | ens Putative uncharacterized protein [Source:UniProtKB/TrEMBL;Acc:Q8C9C6] [ENSMUST00000064287]                                   | 0.30                  | 0.035   | 0.495           |
| chr12:21380896-21387071_R  | chr12:21380896-21387071_R  | lincRNA:chr12:21380896-21387071 reverse strand                                                                                   | 0.30                  | 0.031   | 0.481           |
| Tesk1                      | NM_011571                  | ref Mus musculus testis specific protein kinase 1 (Tesk1), mRNA [NM_011571]                                                      | 0.30                  | 0.016   | 0.426           |
| Lrnf5                      | NM_178714                  | ref Mus musculus leucine rich repeat and fibronectin type III domain containing 5 (Lrnf5), mRNA [NM_178714]                      | 0.30                  | 0.038   | 0.499           |
| ENSMUST00000078232         | ENSMUST00000078232         | ens Putative uncharacterized protein Fragment [Source:UniProtKB/TrEMBL;Acc:Q8CB11] [ENSMUST00000078232]                          | 0.30                  | 0.028   | 0.476           |
| Map3k3                     | NM_011947                  | ref Mus musculus mitogen-activated protein kinase kinase kinase 3 (Map3k3), mRNA [NM_011947]                                     | 0.30                  | 0.039   | 0.500           |
| chr7:113768215-113783490_R | chr7:113768215-113783490_R | lincRNA:chr7:113768215-113783490 reverse strand                                                                                  | 0.29                  | 0.029   | 0.477           |
| D030074E01Rik              | NM_029491                  | ref Mus musculus RIKEN cDNA D030074E01 gene (D030074E01Rik), transcript variant 2, mRNA [NM_029491]                              | 0.29                  | 0.018   | 0.437           |
| Mast1                      | NM_019945                  | ref Mus musculus microtubule associated serine/threonine kinase 1 (Mast1), mRNA [NM_019945]                                      | 0.29                  | 0.039   | 0.499           |
| Dbnnd2                     | NM_026797                  | ref Mus musculus dysbindin (dystrobrevin binding protein 1) domain containing 2 (Dbnnd2), transcript variant 2, mRNA [NM_026797] | 0.29                  | 0.033   | 0.489           |
| Fam49a                     | NM_029758                  | ref Mus musculus family with sequence similarity 49, member A (Fam49a), transcript variant 1, mRNA [NM_029758]                   | 0.29                  | 0.027   | 0.472           |
| Gm5856                     | XR_031301                  | ref PREDICTED: Mus musculus predicted gene, EG545570 (EG545570), misc RNA [XR_031301]                                            | 0.29                  | 0.037   | 0.497           |
| chr8:126396600-126407275_R | chr8:126396600-126407275_R | lincRNA:chr8:126396600-126407275 reverse strand                                                                                  | 0.29                  | 0.045   | 0.513           |
| Sms                        | NM_009214                  | ref Mus musculus spermine synthase (Sms), mRNA [NM_009214]                                                                       | 0.29                  | 0.032   | 0.484           |
| chr16:50715231-50841124_F  | chr16:50715231-50841124_F  | lincRNA:chr16:50715231-50841124 forward strand                                                                                   | 0.29                  | 0.029   | 0.477           |
| ENSMUST00000031652         | ENSMUST00000031652         | ens FMS-like tyrosine kinase 1 Gene [Source:MGI (curated);Acc:MGI:95558] [ENSMUST00000031652]                                    | 0.29                  | 0.049   | 0.519           |
| Dek                        | NM_025900                  | ref Mus musculus DEK oncogene (DNA binding) (Dek), mRNA [NM_025900]                                                              | 0.29                  | 0.043   | 0.509           |
| chr16:11024315-11055740_F  | chr16:11024315-11055740_F  | lincRNA:chr16:11024315-11055740 forward strand                                                                                   | 0.29                  | 0.045   | 0.513           |
| chr17:56687541-56694631_R  | chr17:56687541-56694631_R  | lincRNA:chr17:56687541-56694631 reverse strand                                                                                   | 0.29                  | 0.026   | 0.469           |
| chr5:88995039-89009064_F   | chr5:88995039-89009064_F   | lincRNA:chr5:88995039-89009064 forward strand                                                                                    | 0.29                  | 0.028   | 0.474           |
| Phf13                      | NM_172705                  | ref Mus musculus PHD finger protein 13 (Phf13), mRNA [NM_172705]                                                                 | 0.29                  | 0.039   | 0.501           |
| Nt5c2                      | NM_029810                  | ref Mus musculus 5'-nucleotidase, cytosolic II (Nt5c2), transcript variant 3, mRNA [NM_029810]                                   | 0.29                  | 0.019   | 0.440           |

Online Supplemental Table IV: mG4H-STZ Only

| Gene Symbol                | RefSeq                     | Description                                                                                                                                          | logFC<br>mG4H-<br>STZ | P-value | Adj.<br>P-value |
|----------------------------|----------------------------|------------------------------------------------------------------------------------------------------------------------------------------------------|-----------------------|---------|-----------------|
| chr15:66684765-66685491_F  | chr15:66684765-66685491_F  | lincRNA:chr15:66684765-66685491 forward strand                                                                                                       | 0.29                  | 0.045   | 0.513           |
| Hdac6                      | NM_010413                  | ref  Mus musculus histone deacetylase 6 (Hdac6), transcript variant 1, mRNA [NM_010413]                                                              | 0.29                  | 0.008   | 0.391           |
| 9430076G02Rik              | AK036466                   | gb  Mus musculus adult male bone cDNA, RIKEN full-length enriched library, clone:9830113G23 product:unclassifiable, full insert sequence. [AK036466] | 0.29                  | 0.049   | 0.519           |
| chr18:61781410-61788685_F  | chr18:61781410-61788685_F  | lincRNA:chr18:61781410-61788685 forward strand                                                                                                       | 0.28                  | 0.037   | 0.498           |
| Olfr324                    | NM_001011743               | ref  Mus musculus olfactory receptor 324 (Olfr324), mRNA [NM_001011743]                                                                              | 0.28                  | 0.041   | 0.505           |
| chr5:109154386-109154906_F | chr5:109154386-109154906_F | lincRNA:chr5:109154386-109154906 forward strand                                                                                                      | 0.28                  | 0.042   | 0.507           |
| Brd2                       | NM_010238                  | ref  Mus musculus bromodomain containing 2 (Brd2), transcript variant 1, mRNA [NM_010238]                                                            | 0.28                  | 0.032   | 0.483           |
| chr6:140556677-140557216_F | chr6:140556677-140557216_F | lincRNA:chr6:140556677-140557216 forward strand                                                                                                      | 0.28                  | 0.035   | 0.494           |
| Arhgap21                   | NM_001128084               | ref  Mus musculus Rho GTPase activating protein 21 (Arhgap21), transcript variant 1, mRNA [NM_001128084]                                             | 0.28                  | 0.030   | 0.477           |
| Gm5246                     | XR_034011                  | ref  PREDICTED: Mus musculus similar to 3-phosphoglycerate dehydrogenase (LOC383450), misc RNA [XR_034011]                                           | 0.28                  | 0.036   | 0.495           |
| Calm3                      | NM_007590                  | ref  Mus musculus calmodulin 3 (Calm3), mRNA [NM_007590]                                                                                             | 0.28                  | 0.042   | 0.508           |
| Wdr43                      | NM_175639                  | ref  Mus musculus WD repeat domain 43 (Wdr43), mRNA [NM_175639]                                                                                      | 0.28                  | 0.015   | 0.418           |
| Sgcb                       | NM_011890                  | ref  Mus musculus sarcoglycan, beta (dystrophin-associated glycoprotein) (Sgcb), mRNA [NM_011890]                                                    | 0.28                  | 0.021   | 0.448           |
| Slc38a11                   | NM_177074                  | ref  Mus musculus solute carrier family 38, member 11 (Slc38a11), mRNA [NM_177074]                                                                   | 0.28                  | 0.050   | 0.520           |
| chr7:4827340-4863315_R     | chr7:4827340-4863315_R     | lincRNA:chr7:4827340-4863315 reverse strand                                                                                                          | 0.28                  | 0.028   | 0.474           |
| Cs                         | NM_026444                  | ref  Mus musculus citrate synthase (Cs), nuclear gene encoding mitochondrial protein, mRNA [NM_026444]                                               | 0.28                  | 0.032   | 0.483           |
| Mtdh                       | NM_026002                  | ref  Mus musculus metadherin (Mtdh), mRNA [NM_026002]                                                                                                | 0.28                  | 0.047   | 0.515           |
| Btbd19                     | NR_024078                  | ref  Mus musculus BTB (POZ) domain containing 19 (Btbd19), non-coding RNA [NR_024078]                                                                | 0.28                  | 0.036   | 0.495           |
| Gm9376                     | NM_001101609               | ref  Mus musculus predicted gene 9376 (Gm9376), mRNA [NM_001101609]                                                                                  | 0.28                  | 0.021   | 0.447           |
| Ppp1r1c                    | NM_172420                  | ref  Mus musculus protein phosphatase 1, regulatory (inhibitor) subunit 1C (Ppp1r1c), mRNA [NM_172420]                                               | 0.27                  | 0.042   | 0.507           |
| A1cf                       | NM_001081074               | ref  Mus musculus APOBEC1 complementation factor (A1cf), mRNA [NM_001081074]                                                                         | 0.27                  | 0.019   | 0.441           |
| Gm10823                    | NR_033475                  | ref  Mus musculus predicted gene 10823 (Gm10823), non-coding RNA [NR_033475]                                                                         | 0.27                  | 0.043   | 0.509           |
| Trim31                     | NM_146077                  | ref  Mus musculus tripartite motif-containing 31 (Trim31), mRNA [NM_146077]                                                                          | 0.27                  | 0.041   | 0.507           |
| Dok1                       | NM_010070                  | ref  Mus musculus docking protein 1 (Dok1), mRNA [NM_010070]                                                                                         | 0.27                  | 0.031   | 0.480           |
| Nrf1                       | NM_001164226               | ref  Mus musculus nuclear respiratory factor 1 (Nrf1), transcript variant 1, mRNA [NM_001164226]                                                     | 0.27                  | 0.045   | 0.513           |
| chr8:56200419-56205756_F   | chr8:56200419-56205756_F   | lincRNA:chr8:56200419-56205756 forward strand                                                                                                        | 0.27                  | 0.010   | 0.404           |
| AW742560                   | BB325257                   | gb  BB325257 RIKEN full-length enriched, 4 days neonate male adipose Mus musculus cDNA clone B430115G18 3'. [BB325257]                               | 0.27                  | 0.045   | 0.513           |



| Online Supplemental Table IV: mG4H-STZ Only |                             |                                                                                                              |                       |         |                 |
|---------------------------------------------|-----------------------------|--------------------------------------------------------------------------------------------------------------|-----------------------|---------|-----------------|
| Gene Symbol                                 | RefSeq                      | Description                                                                                                  | logFC<br>mG4H-<br>STZ | P-value | Adj.<br>P-value |
| chr14:80080060-80080597_R                   | chr14:80080060-80080597_R   | lincRNA:chr14:80080060-80080597 reverse strand                                                               | 0.27                  | 0.037   | 0.497           |
| chr4:3756167-3757483_R                      | chr4:3756167-3757483_R      | lincRNA:chr4:3756167-3757483 reverse strand                                                                  | 0.27                  | 0.037   | 0.498           |
| Napb                                        | NM_019632                   | ref Mus musculus N-ethylmaleimide sensitive fusion protein attachment protein beta (Napb), mRNA [NM_019632]  | 0.27                  | 0.043   | 0.511           |
| Gpi1                                        | NM_008155                   | ref Mus musculus glucose phosphate isomerase 1 (Gpi1), mRNA [NM_008155]                                      | 0.27                  | 0.035   | 0.495           |
| LOC633387                                   | ENSMUST00000109354          | ens nucleophosmin 1 Gene [Source:MGI (curated);Acc:MGI:106184] [ENSMUST00000109354]                          | 0.27                  | 0.013   | 0.412           |
| Tmem182                                     | NM_001081198                | ref Mus musculus transmembrane protein 182 (Tmem182), mRNA [NM_001081198]                                    | 0.27                  | 0.031   | 0.482           |
| H60c                                        | XM_001476279                | ref PREDICTED: Mus musculus similar to histocompatibility antigen 60 (LOC670558), mRNA [XM_001476279]        | 0.27                  | 0.017   | 0.434           |
| chr7:134779841-134840591_F                  | chr7:134779841-134840591_F  | lincRNA:chr7:134779841-134840591 forward strand                                                              | 0.27                  | 0.034   | 0.491           |
| B930049P21Rik                               | XM_924259                   | ref PREDICTED: Mus musculus RIKEN cDNA B930049P21 gene (B930049P21Rik), mRNA [XM_924259]                     | 0.27                  | 0.042   | 0.508           |
| Dnajc25                                     | NM_001033165                | ref Mus musculus DnaJ (Hsp40) homolog, subfamily C, member 25 (Dnajc25), mRNA [NM_001033165]                 | 0.27                  | 0.033   | 0.487           |
| Gm5779                                      | NR_033602                   | ref Mus musculus predicted gene 5779 (Gm5779), non-coding RNA [NR_033602]                                    | 0.27                  | 0.009   | 0.394           |
| Smg6                                        | NM_001002764                | ref Mus musculus Smg-6 homolog, nonsense mediated mRNA decay factor (C. elegans) (Smg6), mRNA [NM_001002764] | 0.27                  | 0.038   | 0.499           |
| Jmjd6                                       | NM_033398                   | ref Mus musculus jumonji domain containing 6 (Jmjd6), mRNA [NM_033398]                                       | 0.27                  | 0.039   | 0.499           |
| Gm15361                                     | XM_001475929                | ref PREDICTED: Mus musculus similar to UBE2D3 (LOC100046623), mRNA [XM_001475929]                            | 0.26                  | 0.027   | 0.472           |
| ENSMUST00000062522                          | ENSMUST00000062522          | ens RIKEN cDNA D230002A01 gene Gene [Source:MGI Symbol;Acc:MGI:2441953] [ENSMUST00000062522]                 | 0.26                  | 0.050   | 0.520           |
| chr8:111766396-111772271_R                  | chr8:111766396-111772271_R  | lincRNA:chr8:111766396-111772271 reverse strand                                                              | 0.26                  | 0.047   | 0.515           |
| Rundc1                                      | NM_172566                   | ref Mus musculus RUN domain containing 1 (Rundc1), mRNA [NM_172566]                                          | 0.26                  | 0.033   | 0.487           |
| chr4:53315503-53316050_F                    | chr4:53315503-53316050_F    | lincRNA:chr4:53315503-53316050 forward strand                                                                | 0.26                  | 0.032   | 0.483           |
| Zranb3                                      | NM_027678                   | ref Mus musculus zinc finger, RAN-binding domain containing 3 (Zranb3), mRNA [NM_027678]                     | 0.26                  | 0.039   | 0.500           |
| chr19:14916280-14916548_F                   | chr19:14916280-14916548_F   | lincRNA:chr19:14916280-14916548 forward strand                                                               | 0.26                  | 0.042   | 0.508           |
| chr15:58327703-58329443_R                   | chr15:58327703-58329443_R   | lincRNA:chr15:58327703-58329443 reverse strand                                                               | 0.26                  | 0.034   | 0.493           |
| Txnl4a                                      | NM_178604                   | ref Mus musculus thioredoxin-like 4A (Txnl4a), transcript variant 2, mRNA [NM_178604]                        | 0.26                  | 0.041   | 0.505           |
| chr2:174088550-174109425_F                  | chr2:174088550-174109425_F  | lincRNA:chr2:174088550-174109425 forward strand                                                              | 0.26                  | 0.046   | 0.513           |
| chr11:117768049-117807949_R                 | chr11:117768049-117807949_R | lincRNA:chr11:117768049-117807949 reverse strand                                                             | 0.26                  | 0.025   | 0.463           |
| Vps54                                       | NM_139061                   | ref Mus musculus vacuolar protein sorting 54 (yeast) (Vps54), mRNA [NM_139061]                               | 0.26                  | 0.049   | 0.519           |
| Satb1                                       | NM_009122                   | ref Mus musculus special AT-rich sequence binding protein 1 (Satb1), transcript variant 2, mRNA [NM_009122]  | 0.26                  | 0.050   | 0.519           |

| Online Supplemental Table IV: mG4H-STZ Only |                            |                                                                                                                |                       |         |                 |
|---------------------------------------------|----------------------------|----------------------------------------------------------------------------------------------------------------|-----------------------|---------|-----------------|
| Gene Symbol                                 | RefSeq                     | Description                                                                                                    | logFC<br>mG4H-<br>STZ | P-value | Adj.<br>P-value |
| ENSMUST00000117450                          | ENSMUST00000117450         | ens  BCL2/adenovirus E1B interacting protein 2 Gene [Source:MGI (curated);Acc:MGI:109327] [ENSMUST00000117450] | 0.26                  | 0.034   | 0.491           |
| 4930407110Rik                               | NM_001166475               | ref  Mus musculus RIKEN cDNA 4930407110 gene (4930407110Rik), mRNA [NM_001166475]                              | 0.26                  | 0.038   | 0.499           |
| Map3k14                                     | NM_016896                  | ref  Mus musculus mitogen-activated protein kinase kinase 14 (Map3k14), mRNA [NM_016896]                       | 0.26                  | 0.034   | 0.493           |
| chr2:153163620-153170845_F                  | chr2:153163620-153170845_F | lincRNA:chr2:153163620-153170845 forward strand                                                                | 0.25                  | 0.048   | 0.516           |
| Park2                                       | NM_016694                  | ref  Mus musculus Parkinson disease (autosomal recessive, juvenile) 2, parkin (Park2), mRNA [NM_016694]        | 0.25                  | 0.048   | 0.518           |
| Lins2                                       | NM_152815                  | ref  Mus musculus lines homolog 2 (Drosophila) (Lins2), mRNA [NM_152815]                                       | 0.25                  | 0.045   | 0.513           |
| Zfp36l2                                     | NM_001001806               | ref  Mus musculus zinc finger protein 36, C3H type-like 2 (Zfp36l2), mRNA [NM_001001806]                       | 0.25                  | 0.044   | 0.512           |
| Rchy1                                       | NM_026557                  | ref  Mus musculus ring finger and CHY zinc finger domain containing 1 (Rchy1), mRNA [NM_026557]                | 0.25                  | 0.027   | 0.472           |
| Rnf220                                      | NM_025739                  | ref  Mus musculus ring finger protein 220 (Rnf220), mRNA [NM_025739]                                           | 0.25                  | 0.035   | 0.495           |
| Sms                                         | NM_009214                  | ref  Mus musculus spermine synthase (Sms), mRNA [NM_009214]                                                    | 0.25                  | 0.038   | 0.499           |
| Gm2298                                      | XM_001473075               | ref  PREDICTED: Mus musculus hypothetical protein LOC100039538 (LOC100039538), mRNA [XM_001473075]             | 0.25                  | 0.034   | 0.491           |
| Xpc                                         | NM_009531                  | ref  Mus musculus xeroderma pigmentosum, complementation group C (Xpc), mRNA [NM_009531]                       | 0.25                  | 0.044   | 0.512           |
| Vps54                                       | NM_139061                  | ref  Mus musculus vacuolar protein sorting 54 (yeast) (Vps54), mRNA [NM_139061]                                | 0.25                  | 0.038   | 0.499           |
| chr19:23068397-23190256_R                   | chr19:23068397-23190256_R  | lincRNA:chr19:23068397-23190256 reverse strand                                                                 | 0.24                  | 0.046   | 0.513           |
| Metrn1                                      | NM_144797                  | ref  Mus musculus meteorin, glial cell differentiation regulator-like (Metrn1), mRNA [NM_144797]               | 0.24                  | 0.031   | 0.483           |
| Nup50                                       | NM_016714                  | ref  Mus musculus nucleoporin 50 (Nup50), mRNA [NM_016714]                                                     | 0.24                  | 0.050   | 0.520           |
| ENSMUST00000100697                          | ENSMUST00000100697         | ref  PREDICTED: Mus musculus predicted gene, EG666678 (EG666678), mRNA [XM_985370]                             | 0.24                  | 0.044   | 0.512           |
| ENSMUST00000101159                          | ENSMUST00000101159         | ens  RIKEN cDNA C330024D21 gene Gene [Source:MGI Symbol;Acc:MGI:2444116] [ENSMUST00000101159]                  | 0.24                  | 0.049   | 0.519           |
| Dis3                                        | NM_028315                  | ref  Mus musculus DIS3 mitotic control homolog (S. cerevisiae) (Dis3), mRNA [NM_028315]                        | 0.24                  | 0.041   | 0.505           |
| Wt1                                         | NM_144783                  | ref  Mus musculus Wilms tumor 1 homolog (Wt1), mRNA [NM_144783]                                                | 0.24                  | 0.045   | 0.513           |
| Rabggtb                                     | NM_011231                  | ref  Mus musculus RAB geranylgeranyl transferase, b subunit (Rabggtb), transcript variant 1, mRNA [NM_011231]  | 0.24                  | 0.022   | 0.451           |
| chr11:51854060-51903278_F                   | chr11:51854060-51903278_F  | lincRNA:chr11:51854060-51903278 forward strand                                                                 | 0.24                  | 0.043   | 0.510           |
| Mir17hg                                     | NR_029382                  | ref  Mus musculus MIR17 host gene 1 (non-protein coding) (Mir17hg), non-coding RNA [NR_029382]                 | 0.24                  | 0.046   | 0.513           |
| Rnf181                                      | NM_025607                  | ref  Mus musculus ring finger protein 181 (Rnf181), mRNA [NM_025607]                                           | 0.24                  | 0.041   | 0.507           |
| chr5:122047900-122065325_F                  | chr5:122047900-122065325_F | lincRNA:chr5:122047900-122065325 forward strand                                                                | 0.23                  | 0.038   | 0.499           |
| Gm13161                                     | XM_892400                  | ref  PREDICTED: Mus musculus similar to TLK2 protein (LOC627701), mRNA [XM_892400]                             | 0.23                  | 0.047   | 0.515           |

Online Supplemental Table IV: mG4H-STZ Only

| Gene Symbol                | RefSeq                     | Description                                                                                                                               | logFC<br>mG4H-<br>STZ | P-value | Adj.<br>P-value |
|----------------------------|----------------------------|-------------------------------------------------------------------------------------------------------------------------------------------|-----------------------|---------|-----------------|
| Bglap                      | NM_001037939               | ref Mus musculus bone gamma carboxyglutamate protein (Bglap), transcript variant 2, mRNA [NM_001037939]                                   | 0.23                  | 0.020   | 0.443           |
| chr13:98221098-98480773_R  | chr13:98221098-98480773_R  | lincRNA:chr13:98221098-98480773 reverse strand                                                                                            | 0.23                  | 0.042   | 0.507           |
| Ncoa6                      | NM_019825                  | ref Mus musculus nuclear receptor coactivator 6 (Ncoa6), mRNA [NM_019825]                                                                 | 0.23                  | 0.040   | 0.504           |
| Usp7                       | NM_001003918               | ref Mus musculus ubiquitin specific peptidase 7 (Usp7), mRNA [NM_001003918]                                                               | 0.22                  | 0.044   | 0.511           |
| Plekha1                    | NM_133942                  | ref Mus musculus pleckstrin homology domain containing, family A (phosphoinositide binding specific) member 1 (Plekha1), mRNA [NM_133942] | 0.22                  | 0.033   | 0.490           |
| Fbxw11                     | NM_134015                  | ref Mus musculus F-box and WD-40 domain protein 11 (Fbxw11), mRNA [NM_134015]                                                             | 0.22                  | 0.030   | 0.477           |
| Otud5                      | NM_138604                  | ref Mus musculus OTU domain containing 5 (Otud5), mRNA [NM_138604]                                                                        | 0.22                  | 0.038   | 0.499           |
| ENSMUST00000099365         | ENSMUST00000099365         | ens Putative uncharacterized protein Fragment [Source:UniProtKB/TrEMBL;Acc:Q3UTF5] [ENSMUST00000099365]                                   | 0.22                  | 0.048   | 0.517           |
| chr6:134879009-134880130_F | chr6:134879009-134880130_F | lincRNA:chr6:134879009-134880130 forward strand                                                                                           | 0.22                  | 0.048   | 0.516           |
| chr11:76400207-76434732_F  | chr11:76400207-76434732_F  | lincRNA:chr11:76400207-76434732 forward strand                                                                                            | 0.22                  | 0.049   | 0.518           |
| Klhl26                     | NM_178771                  | ref Mus musculus kelch-like 26 (Drosophila) (Klhl26), transcript variant 2, mRNA [NM_178771]                                              | 0.22                  | 0.020   | 0.447           |
| Rtn3                       | NM_001003934               | ref Mus musculus reticulon 3 (Rtn3), transcript variant 1, mRNA [NM_001003934]                                                            | 0.21                  | 0.042   | 0.508           |
| chr17:6602100-6615425_F    | chr17:6602100-6615425_F    | lincRNA:chr17:6602100-6615425 forward strand                                                                                              | 0.21                  | 0.045   | 0.513           |
| Cmtm4                      | NM_153582                  | ref Mus musculus CKLF-like MARVEL transmembrane domain containing 4 (Cmtm4), mRNA [NM_153582]                                             | 0.21                  | 0.035   | 0.495           |
| Txlna                      | NM_001005506               | ref Mus musculus taxilin alpha (Txlna), mRNA [NM_001005506]                                                                               | 0.21                  | 0.048   | 0.516           |
| Sepp1                      | NM_001042614               | ref Mus musculus selenoprotein P, plasma, 1 (Sepp1), transcript variant 3, mRNA [NM_001042614]                                            | 0.20                  | 0.043   | 0.511           |
| Wrnip1                     | NM_030215                  | ref Mus musculus Werner helicase interacting protein 1 (Wrnip1), mRNA [NM_030215]                                                         | 0.20                  | 0.041   | 0.506           |
| Dtna                       | NM_010087                  | ref Mus musculus dystrobrevin alpha (Dtna), transcript variant 2, mRNA [NM_010087]                                                        | 0.19                  | 0.048   | 0.518           |
| Gm9109                     | XR_031632                  | ref PREDICTED: Mus musculus similar to transcriptional adaptor 3-like (LOC676150), misc RNA [XR_031632]                                   | -0.20                 | 0.037   | 0.496           |
| chr7:106525007-106525661_R | chr7:106525007-106525661_R | lincRNA:chr7:106525007-106525661 reverse strand                                                                                           | -0.20                 | 0.045   | 0.513           |
| Tial1                      | NM_009383                  | ref Mus musculus Tia1 cytotoxic granule-associated RNA binding protein-like 1 (Tial1), mRNA [NM_009383]                                   | -0.20                 | 0.046   | 0.513           |
| Cnpy3                      | NM_028065                  | ref Mus musculus canopy 3 homolog (zebrafish) (Cnpy3), mRNA [NM_028065]                                                                   | -0.20                 | 0.046   | 0.514           |
| Ndufb2                     | ENSMUST00000135671         | ens NADH dehydrogenase (ubiquinone) 1 beta subcomplex, 2 Gene [Source:MGI (curated);Acc:MGI:1915448] [ENSMUST00000135671]                 | -0.20                 | 0.039   | 0.499           |
| Adat3                      | NM_001100606               | ref Mus musculus adenosine deaminase, tRNA-specific 3, TAD2 homolog (S. cerevisiae) (Adat3), mRNA [NM_001100606]                          | -0.21                 | 0.038   | 0.499           |
| chrX:47890565-47915775_F   | chrX:47890565-47915775_F   | lincRNA:chrX:47890565-47915775 forward strand                                                                                             | -0.21                 | 0.048   | 0.516           |
| Vegfb                      | NM_011697                  | ref Mus musculus vascular endothelial growth factor B (Vegfb), transcript variant 1, mRNA [NM_011697]                                     | -0.21                 | 0.039   | 0.501           |
| Psph                       | NM_133900                  | ref Mus musculus phosphoserine phosphatase (Psph), mRNA [NM_133900]                                                                       | -0.21                 | 0.042   | 0.508           |

Online Supplemental Table IV: mG4H-STZ Only

| Gene Symbol                | RefSeq                     | Description                                                                                                                                           | logFC<br>mG4H-<br>STZ | P-value | Adj.<br>P-value |
|----------------------------|----------------------------|-------------------------------------------------------------------------------------------------------------------------------------------------------|-----------------------|---------|-----------------|
| Gm8850                     | XR_002254                  | ref PREDICTED: Mus musculus predicted gene, EG667867 (EG667867), misc RNA [XR_002254]                                                                 | -0.22                 | 0.038   | 0.499           |
| Fam63b                     | NM_172772                  | ref Mus musculus family with sequence similarity 63, member B (Fam63b), mRNA [NM_172772]                                                              | -0.22                 | 0.041   | 0.505           |
| Snx11                      | NM_028965                  | ref Mus musculus sorting nexin 11 (Snx11), mRNA [NM_028965]                                                                                           | -0.22                 | 0.038   | 0.498           |
| Mrp63                      | NM_026401                  | ref Mus musculus mitochondrial ribosomal protein 63 (Mrp63), nuclear gene encoding mitochondrial protein, mRNA [NM_026401]                            | -0.22                 | 0.034   | 0.493           |
| Scand1                     | NM_020255                  | ref Mus musculus SCAN domain-containing 1 (Scand1), mRNA [NM_020255]                                                                                  | -0.22                 | 0.037   | 0.498           |
| Mrps26                     | NM_207207                  | ref Mus musculus mitochondrial ribosomal protein S26 (Mrps26), nuclear gene encoding mitochondrial protein, mRNA [NM_207207]                          | -0.22                 | 0.044   | 0.511           |
| Ankrd29                    | NM_001190371               | ref Mus musculus ankyrin repeat domain 29 (Ankrd29), mRNA [NM_001190371]                                                                              | -0.22                 | 0.046   | 0.513           |
| Dtd1                       | NM_025314                  | ref Mus musculus D-tyrosyl-tRNA deacylase 1 homolog (S. cerevisiae) (Dtd1), nuclear gene encoding mitochondrial protein, mRNA [NM_025314]             | -0.23                 | 0.043   | 0.511           |
| Tm7sf2                     | NM_028454                  | ref Mus musculus transmembrane 7 superfamily member 2 (Tm7sf2), mRNA [NM_028454]                                                                      | -0.23                 | 0.036   | 0.495           |
| 4930500F04Rik              | AK015658                   | gb Mus musculus adult male testis cDNA, RIKEN full-length enriched library, clone:4930500F04 product:unclassifiable, full insert sequence. [AK015658] | -0.23                 | 0.049   | 0.519           |
| Cdkl2                      | NM_016912                  | ref Mus musculus cyclin-dependent kinase-like 2 (CDC2-related kinase) (Cdkl2), transcript variant 1, mRNA [NM_016912]                                 | -0.23                 | 0.036   | 0.495           |
| chr10:82074600-82085425_F  | chr10:82074600-82085425_F  | lincRNA:chr10:82074600-82085425 forward strand                                                                                                        | -0.23                 | 0.035   | 0.495           |
| Enpp5                      | NM_032003                  | ref Mus musculus ectonucleotide pyrophosphatase/phosphodiesterase 5 (Enpp5), transcript variant 1, mRNA [NM_032003]                                   | -0.23                 | 0.039   | 0.501           |
| Nit1                       | NM_012049                  | ref Mus musculus nitrilase 1 (Nit1), transcript variant 1, mRNA [NM_012049]                                                                           | -0.23                 | 0.023   | 0.456           |
| XM_001479647               | XM_001479647               | ref PREDICTED: Mus musculus hypothetical protein LOC100043157 (LOC100043157), mRNA [XM_001479647]                                                     | -0.23                 | 0.030   | 0.477           |
| C330006K01Rik              | NM_172725                  | ref Mus musculus RIKEN cDNA C330006K01 gene (C330006K01Rik), mRNA [NM_172725]                                                                         | -0.23                 | 0.038   | 0.499           |
| chr4:146017200-146029700_R | chr4:146017200-146029700_R | lincRNA:chr4:146017200-146029700 reverse strand                                                                                                       | -0.23                 | 0.043   | 0.509           |
| Mtag2                      | NR_027802                  | ref Mus musculus metastasis associated gene 2 (Mtag2), non-coding RNA [NR_027802]                                                                     | -0.23                 | 0.028   | 0.474           |
| Atp11a                     | NM_015804                  | ref Mus musculus ATPase, class VI, type 11A (Atp11a), mRNA [NM_015804]                                                                                | -0.23                 | 0.041   | 0.505           |
| Cox4i2                     | NM_053091                  | ref Mus musculus cytochrome c oxidase subunit IV isoform 2 (Cox4i2), nuclear gene encoding mitochondrial protein, mRNA [NM_053091]                    | -0.23                 | 0.042   | 0.507           |
| chr2:25782483-25783075_R   | chr2:25782483-25783075_R   | lincRNA:chr2:25782483-25783075 reverse strand                                                                                                         | -0.24                 | 0.046   | 0.513           |
| 2610008E11Rik              | NM_001004362               | ref Mus musculus RIKEN cDNA 2610008E11 gene (2610008E11Rik), mRNA [NM_001004362]                                                                      | -0.24                 | 0.049   | 0.519           |
| Cox8b                      | NM_007751                  | ref Mus musculus cytochrome c oxidase, subunit VIIIb (Cox8b), nuclear gene encoding mitochondrial protein, mRNA [NM_007751]                           | -0.24                 | 0.036   | 0.495           |
| Gas1                       | NM_008086                  | ref Mus musculus growth arrest specific 1 (Gas1), mRNA [NM_008086]                                                                                    | -0.24                 | 0.046   | 0.514           |
| Dnajc30                    | NM_025362                  | ref Mus musculus DnaJ (Hsp40) homolog, subfamily C, member 30 (Dnajc30), mRNA [NM_025362]                                                             | -0.24                 | 0.039   | 0.500           |
| Sfrp4                      | NM_016687                  | ref Mus musculus secreted frizzled-related protein 4 (Sfrp4), mRNA [NM_016687]                                                                        | -0.24                 | 0.044   | 0.512           |
| Mtif3                      | NM_029581                  | ref Mus musculus mitochondrial translational initiation factor 3 (Mtif3), nuclear gene encoding mitochondrial protein, mRNA [NM_029581]               | -0.24                 | 0.031   | 0.482           |

Online Supplemental Table IV: mG4H-STZ Only

| Gene Symbol                      | RefSeq                    | Description                                                                                                                                                                                  | logFC<br>mG4H-<br>STZ | P-value | Adj.<br>P-value |
|----------------------------------|---------------------------|----------------------------------------------------------------------------------------------------------------------------------------------------------------------------------------------|-----------------------|---------|-----------------|
| <b>Mrpl47</b>                    | NM_029017                 | ref Mus musculus mitochondrial ribosomal protein L47 (Mrpl47), nuclear gene encoding mitochondrial protein, mRNA [NM_029017]                                                                 | -0.24                 | 0.026   | 0.470           |
| <b>1700084J12Rik</b>             | AK006993                  | gb Mus musculus adult male testis cDNA, RIKEN full-length enriched library, clone:1700084J12 product:hypothetical Ribosomal protein L30 containing protein, full insert sequence. [AK006993] | -0.24                 | 0.042   | 0.508           |
| <b>Map6d1</b>                    | NM_198599                 | ref Mus musculus MAP6 domain containing 1 (Map6d1), mRNA [NM_198599]                                                                                                                         | -0.24                 | 0.037   | 0.498           |
| <b>Jmjd5</b>                     | NM_029842                 | ref Mus musculus jumonji domain containing 5 (Jmjd5), mRNA [NM_029842]                                                                                                                       | -0.24                 | 0.048   | 0.518           |
| <b>Cyb5r1</b>                    | NM_028057                 | ref Mus musculus cytochrome b5 reductase 1 (Cyb5r1), mRNA [NM_028057]                                                                                                                        | -0.24                 | 0.038   | 0.499           |
| <b>Ikbkap</b>                    | NM_026079                 | ref Mus musculus inhibitor of kappa light polypeptide enhancer in B-cells, kinase complex-associated protein (Ikbkap), mRNA [NM_026079]                                                      | -0.24                 | 0.042   | 0.508           |
| <b>Gm4546</b>                    | XM_001480518              | ref PREDICTED: Mus musculus hypothetical protein LOC100043605 (LOC100043605), mRNA [XM_001480518]                                                                                            | -0.24                 | 0.049   | 0.519           |
| <b>chr17:88466300-88495175_F</b> | chr17:88466300-88495175_F | lincRNA:chr17:88466300-88495175 forward strand                                                                                                                                               | -0.24                 | 0.030   | 0.477           |
| <b>Nsd1</b>                      | NM_008739                 | ref Mus musculus nuclear receptor-binding SET-domain protein 1 (Nsd1), mRNA [NM_008739]                                                                                                      | -0.24                 | 0.047   | 0.515           |
| <b>Coro7</b>                     | NM_030205                 | ref Mus musculus coronin 7 (Coro7), mRNA [NM_030205]                                                                                                                                         | -0.24                 | 0.035   | 0.494           |
| <b>Brcc3</b>                     | NM_145956                 | ref Mus musculus BRCA1/BRCA2-containing complex, subunit 3 (Brcc3), transcript variant 2, mRNA [NM_145956]                                                                                   | -0.25                 | 0.037   | 0.496           |
| <b>Caprin1</b>                   | NM_016739                 | ref Mus musculus cell cycle associated protein 1 (Caprin1), transcript variant 1, mRNA [NM_016739]                                                                                           | -0.25                 | 0.045   | 0.513           |
| <b>Fbxo25</b>                    | NM_025785                 | ref Mus musculus F-box protein 25 (Fbxo25), mRNA [NM_025785]                                                                                                                                 | -0.25                 | 0.033   | 0.490           |
| <b>Znhit1</b>                    | NM_027318                 | ref Mus musculus zinc finger, HIT domain containing 1 (Znhit1), mRNA [NM_027318]                                                                                                             | -0.25                 | 0.033   | 0.488           |
| <b>Tug1</b>                      | NR_002322                 | ref Mus musculus taurine upregulated gene 1 (Tug1), transcript variant b, non-coding RNA [NR_002322]                                                                                         | -0.25                 | 0.049   | 0.519           |
| <b>Stra13</b>                    | NM_016665                 | ref Mus musculus stimulated by retinoic acid 13 (Stra13), mRNA [NM_016665]                                                                                                                   | -0.25                 | 0.046   | 0.513           |
| <b>Romo1</b>                     | NM_001164217              | ref Mus musculus reactive oxygen species modulator 1 (Romo1), nuclear gene encoding mitochondrial protein, mRNA [NM_001164217]                                                               | -0.25                 | 0.041   | 0.506           |
| <b>Erp29</b>                     | NM_026129                 | ref Mus musculus endoplasmic reticulum protein 29 (Erp29), mRNA [NM_026129]                                                                                                                  | -0.25                 | 0.045   | 0.513           |
| <b>Aurkaip1</b>                  | NM_025338                 | ref Mus musculus aurora kinase A interacting protein 1 (Aurkaip1), mRNA [NM_025338]                                                                                                          | -0.25                 | 0.033   | 0.490           |
| <b>Polr2k</b>                    | NM_023127                 | ref Mus musculus polymerase (RNA) II (DNA directed) polypeptide K (Polr2k), transcript variant 2, mRNA [NM_023127]                                                                           | -0.25                 | 0.027   | 0.471           |
| <b>Sdhb</b>                      | NM_023374                 | ref Mus musculus succinate dehydrogenase complex, subunit B, iron sulfur (lp) (Sdhb), nuclear gene encoding mitochondrial protein, mRNA [NM_023374]                                          | -0.25                 | 0.014   | 0.417           |
| <b>Jmjd8</b>                     | NM_028101                 | ref Mus musculus jumonji domain containing 8 (Jmjd8), mRNA [NM_028101]                                                                                                                       | -0.25                 | 0.020   | 0.445           |
| <b>Lman1</b>                     | NM_027400                 | ref Mus musculus lectin, mannose-binding, 1 (Lman1), transcript variant 1, mRNA [NM_027400]                                                                                                  | -0.25                 | 0.045   | 0.513           |
| <b>Chchd1</b>                    | NM_025366                 | ref Mus musculus coiled-coil-helix-coiled-coil-helix domain containing 1 (Chchd1), mRNA [NM_025366]                                                                                          | -0.25                 | 0.049   | 0.519           |
| <b>chr11:69196530-69197001_F</b> | chr11:69196530-69197001_F | lincRNA:chr11:69196530-69197001 forward strand                                                                                                                                               | -0.25                 | 0.044   | 0.513           |
| <b>BC031181</b>                  | NM_001001181              | ref Mus musculus cDNA sequence BC031181 (BC031181), mRNA [NM_001001181]                                                                                                                      | -0.25                 | 0.035   | 0.493           |
| <b>Apba3</b>                     | NM_018758                 | ref Mus musculus amyloid beta (A4) precursor protein-binding, family A, member 3 (Apba3), mRNA [NM_018758]                                                                                   | -0.25                 | 0.025   | 0.466           |

Online Supplemental Table IV: mG4H-STZ Only

| Gene Symbol               | RefSeq                    | Description                                                                                                                                                  | logFC<br>mG4H-<br>STZ | P-value | Adj.<br>P-value |
|---------------------------|---------------------------|--------------------------------------------------------------------------------------------------------------------------------------------------------------|-----------------------|---------|-----------------|
| Padi4                     | NM_011061                 | ref Mus musculus peptidyl arginine deiminase, type IV (Padi4), mRNA [NM_011061]                                                                              | -0.26                 | 0.048   | 0.516           |
| Rsl24d1                   | NM_198609                 | ref Mus musculus ribosomal L24 domain containing 1 (Rsl24d1), mRNA [NM_198609]                                                                               | -0.26                 | 0.048   | 0.516           |
| Mapk1                     | NM_011949                 | ref Mus musculus mitogen-activated protein kinase 1 (Mapk1), transcript variant 1, mRNA [NM_011949]                                                          | -0.26                 | 0.028   | 0.476           |
| Ogfod1                    | NM_177767                 | ref Mus musculus 2-oxoglutarate and iron-dependent oxygenase domain containing 1 (Ogfod1), transcript variant 1, mRNA [NM_177767]                            | -0.26                 | 0.042   | 0.507           |
| LOC100047738              | XM_001478788              | ref PREDICTED: Mus musculus similar to DENN/MADD domain containing 1A (LOC100047738), mRNA [XM_001478788]                                                    | -0.26                 | 0.031   | 0.480           |
| Dennd4b                   | NM_201407                 | ref Mus musculus DENN/MADD domain containing 4B (Dennd4b), mRNA [NM_201407]                                                                                  | -0.26                 | 0.036   | 0.495           |
| Exosc5                    | NM_138586                 | ref Mus musculus exosome component 5 (Exosc5), mRNA [NM_138586]                                                                                              | -0.26                 | 0.043   | 0.509           |
| Gm3640                    | XM_001477435              | ref PREDICTED: Mus musculus hypothetical protein LOC100042048 (LOC100042048), mRNA [XM_001477435]                                                            | -0.26                 | 0.020   | 0.447           |
| Idh3b                     | NM_130884                 | ref Mus musculus isocitrate dehydrogenase 3 (NAD+) beta (Idh3b), nuclear gene encoding mitochondrial protein, mRNA [NM_130884]                               | -0.26                 | 0.034   | 0.493           |
| Akr1b3                    | NM_009658                 | ref Mus musculus aldo-keto reductase family 1, member B3 (aldose reductase) (Akr1b3), mRNA [NM_009658]                                                       | -0.26                 | 0.045   | 0.513           |
| Rnaseh2b                  | NM_026001                 | ref Mus musculus ribonuclease H2, subunit B (Rnaseh2b), mRNA [NM_026001]                                                                                     | -0.27                 | 0.029   | 0.477           |
| ENSMUST00000098692        | ENSMUST00000098692        | ens nei endonuclease VIII-like 1 (E. coli) Gene [Source:MGI Symbol;Acc:MGI:1920024] [ENSMUST00000098692]                                                     | -0.27                 | 0.026   | 0.470           |
| chr9:32156266-32169196_F  | chr9:32156266-32169196_F  | lincRNA:chr9:32156266-32169196 forward strand                                                                                                                | -0.27                 | 0.029   | 0.477           |
| Ttc28                     | NM_024477                 | ref Mus musculus tetratricopeptide repeat domain 28 (Ttc28), mRNA [NM_024477]                                                                                | -0.27                 | 0.030   | 0.478           |
| chr6:31267612-31293337_R  | chr6:31267612-31293337_R  | lincRNA:chr6:31267612-31293337 reverse strand                                                                                                                | -0.27                 | 0.049   | 0.519           |
| 5730408K05Rik             | AK017527                  | gb Mus musculus 8 days embryo whole body cDNA, RIKEN full-length enriched library, clone:5730408K05 product:unclassifiable, full insert sequence. [AK017527] | -0.27                 | 0.042   | 0.508           |
| Slc39a3                   | NM_134135                 | ref Mus musculus solute carrier family 39 (zinc transporter), member 3 (Slc39a3), mRNA [NM_134135]                                                           | -0.27                 | 0.046   | 0.513           |
| 1700034H14Rik             | NM_025969                 | ref Mus musculus RIKEN cDNA 1700034H14 gene (1700034H14Rik), mRNA [NM_025969]                                                                                | -0.27                 | 0.044   | 0.513           |
| ENSMUST00000112413        | ENSMUST00000112413        | ens proacrosin binding protein Gene [Source:MGI (curated);Acc:MGI:1859515] [ENSMUST00000112413]                                                              | -0.27                 | 0.043   | 0.510           |
| Acn9                      | NM_001077713              | ref Mus musculus ACN9 homolog (S. cerevisiae) (Acn9), mRNA [NM_001077713]                                                                                    | -0.27                 | 0.029   | 0.477           |
| Gm7075                    | XM_905848                 | ref PREDICTED: Mus musculus predicted gene, EG631906 (EG631906), mRNA [XM_905848]                                                                            | -0.27                 | 0.032   | 0.485           |
| 1810030N24Rik             | NM_025471                 | ref Mus musculus RIKEN cDNA 1810030N24 gene (1810030N24Rik), mRNA [NM_025471]                                                                                | -0.27                 | 0.026   | 0.470           |
| Mtch1                     | NM_019880                 | ref Mus musculus mitochondrial carrier homolog 1 (C. elegans) (Mtch1), nuclear gene encoding mitochondrial protein, mRNA [NM_019880]                         | -0.27                 | 0.042   | 0.507           |
| Wdr8                      | NM_021499                 | ref Mus musculus WD repeat domain 8 (Wdr8), mRNA [NM_021499]                                                                                                 | -0.27                 | 0.041   | 0.506           |
| chr10:3227840-3233588_R   | chr10:3227840-3233588_R   | lincRNA:chr10:3227840-3233588 reverse strand                                                                                                                 | -0.27                 | 0.035   | 0.494           |
| chr13:48576557-48581836_F | chr13:48576557-48581836_F | lincRNA:chr13:48576557-48581836 forward strand                                                                                                               | -0.27                 | 0.028   | 0.474           |
| 1700071K01Rik             | NM_001033765              | ref Mus musculus RIKEN cDNA 1700071K01 gene (1700071K01Rik), mRNA [NM_001033765]                                                                             | -0.27                 | 0.015   | 0.421           |
| 9930111J21Rik2            | NM_173434                 | ref Mus musculus RIKEN cDNA 9930111J21 gene 2 (9930111J21Rik2), mRNA [NM_173434]                                                                             | -0.28                 | 0.044   | 0.511           |



Online Supplemental Table IV: mG4H-STZ Only

| Gene Symbol                | RefSeq                     | Description                                                                                                                                             | logFC<br>mG4H-<br>STZ | P-value | Adj.<br>P-value |
|----------------------------|----------------------------|---------------------------------------------------------------------------------------------------------------------------------------------------------|-----------------------|---------|-----------------|
| Pafah1b1                   | NM_013625                  | ref Mus musculus platelet-activating factor acetylhydrolase, isoform 1b, subunit 1 (Pafah1b1), mRNA [NM_013625]                                         | -0.28                 | 0.026   | 0.471           |
| Lrsam1                     | NM_199302                  | ref Mus musculus leucine rich repeat and sterile alpha motif containing 1 (Lrsam1), mRNA [NM_199302]                                                    | -0.28                 | 0.033   | 0.487           |
| Muted                      | NM_139063                  | ref Mus musculus muted (Muted), mRNA [NM_139063]                                                                                                        | -0.28                 | 0.043   | 0.511           |
| chr10:6081900-6105500_F    | chr10:6081900-6105500_F    | lincRNA:chr10:6081900-6105500 forward strand                                                                                                            | -0.28                 | 0.049   | 0.519           |
| Esr1                       | NM_007956                  | ref Mus musculus estrogen receptor 1 (alpha) (Esr1), mRNA [NM_007956]                                                                                   | -0.28                 | 0.026   | 0.469           |
| 5430402P08Rik              | AK017263                   | gb Mus musculus 6 days neonate head cDNA, RIKEN full-length enriched library, clone:5430402P08 product:unclassifiable, full insert sequence. [AK017263] | -0.28                 | 0.047   | 0.514           |
| ENSMUST00000111210         | ENSMUST00000111210         | ens interferon activated gene 203 Gene [Source:MGI (curated);Acc:MGI:96428] [ENSMUST00000111210]                                                        | -0.28                 | 0.039   | 0.501           |
| LOC100048160               | XM_001479663               | ref PREDICTED: Mus musculus hypothetical protein LOC100048160 (LOC100048160), mRNA [XM_001479663]                                                       | -0.28                 | 0.040   | 0.501           |
| ENSMUST00000145391         | ENSMUST00000145391         | ens PDZ domain containing 7 Gene [Source:MGI (curated);Acc:MGI:3608325] [ENSMUST00000145391]                                                            | -0.28                 | 0.039   | 0.501           |
| Rprm                       | NM_023396                  | ref Mus musculus reprimin, TP53 dependent G2 arrest mediator candidate (Rprm), mRNA [NM_023396]                                                         | -0.28                 | 0.033   | 0.487           |
| Tbx21                      | NM_019507                  | ref Mus musculus T-box 21 (Tbx21), mRNA [NM_019507]                                                                                                     | -0.28                 | 0.050   | 0.520           |
| LOC100045228               | ENSMUST00000151528         | ens neurologin 3 Gene [Source:MGI (curated);Acc:MGI:2444609] [ENSMUST00000151528]                                                                       | -0.28                 | 0.045   | 0.513           |
| Ndufa5                     | NM_026614                  | ref Mus musculus NADH dehydrogenase (ubiquinone) 1 alpha subcomplex, 5 (Ndufa5), nuclear gene encoding mitochondrial protein, mRNA [NM_026614]          | -0.28                 | 0.045   | 0.513           |
| Eps8l1                     | NM_026146                  | ref Mus musculus EPS8-like 1 (Eps8l1), mRNA [NM_026146]                                                                                                 | -0.28                 | 0.017   | 0.435           |
| Gm2375                     | XM_001473352               | ref PREDICTED: Mus musculus hypothetical protein LOC100039697 (LOC100039697), mRNA [XM_001473352]                                                       | -0.28                 | 0.023   | 0.456           |
| Acrbp                      | NM_016845                  | ref Mus musculus proacrosin binding protein (Acrbp), transcript variant 1, mRNA [NM_016845]                                                             | -0.28                 | 0.033   | 0.490           |
| 1700007I08Rik              | NM_001171640               | ref Mus musculus RIKEN cDNA 1700007I08 gene (1700007I08Rik), mRNA [NM_001171640]                                                                        | -0.28                 | 0.008   | 0.391           |
| Slc35a1                    | NM_011895                  | ref Mus musculus solute carrier family 35 (CMP-sialic acid transporter), member 1 (Slc35a1), mRNA [NM_011895]                                           | -0.28                 | 0.046   | 0.513           |
| LOC100048244               | XM_001479844               | ref PREDICTED: Mus musculus similar to HBxAg transactivated protein 2 (LOC100048244), mRNA [XM_001479844]                                               | -0.29                 | 0.030   | 0.480           |
| ENSMUST00000089098         | ENSMUST00000089098         | ens Putative uncharacterized proteinMGC58416 protein ; [Source:UniProtKB/TrEMBL;Acc:Q8BIG3] [ENSMUST00000089098]                                        | -0.29                 | 0.038   | 0.498           |
| chr17:95255725-95272425_R  | chr17:95255725-95272425_R  | lincRNA:chr17:95255725-95272425 reverse strand                                                                                                          | -0.29                 | 0.038   | 0.498           |
| chr7:134779841-134840591_F | chr7:134779841-134840591_F | lincRNA:chr7:134779841-134840591 forward strand                                                                                                         | -0.29                 | 0.034   | 0.491           |
| chr14:26973425-26986650_R  | chr14:26973425-26986650_R  | lincRNA:chr14:26973425-26986650 reverse strand                                                                                                          | -0.29                 | 0.031   | 0.482           |
| chr1:175705225-175717250_R | chr1:175705225-175717250_R | lincRNA:chr1:175705225-175717250 reverse strand                                                                                                         | -0.29                 | 0.014   | 0.414           |
| chr7:88126007-88138301_R   | chr7:88126007-88138301_R   | lincRNA:chr7:88126007-88138301 reverse strand                                                                                                           | -0.29                 | 0.046   | 0.513           |
| ENSMUST00000101635         | ENSMUST00000101635         | ens Putative uncharacterized protein [Source:UniProtKB/TrEMBL;Acc:Q3UCH3] [ENSMUST00000101635]                                                          | -0.29                 | 0.026   | 0.468           |
| Mamstr                     | NM_172418                  | ref Mus musculus MEF2 activating motif and SAP domain containing transcriptional regulator (Mamstr), mRNA [NM_172418]                                   | -0.29                 | 0.028   | 0.474           |

Online Supplemental Table IV: mG4H-STZ Only

| Gene Symbol                 | RefSeq                      | Description                                                                                                                                                 | logFC<br>mG4H-<br>STZ | P-value | Adj.<br>P-value |
|-----------------------------|-----------------------------|-------------------------------------------------------------------------------------------------------------------------------------------------------------|-----------------------|---------|-----------------|
| chr5:35492530-35492959_R    | chr5:35492530-35492959_R    | lincRNA:chr5:35492530-35492959 reverse strand                                                                                                               | -0.29                 | 0.047   | 0.515           |
| chrX:148720661-148763177_F  | chrX:148720661-148763177_F  | lincRNA:chrX:148720661-148763177 forward strand                                                                                                             | -0.29                 | 0.020   | 0.447           |
| chr1:138442536-138521080_F  | chr1:138442536-138521080_F  | lincRNA:chr1:138442536-138521080 forward strand                                                                                                             | -0.29                 | 0.043   | 0.511           |
| Gm13642                     | XM_001474344                | ref PREDICTED: Mus musculus similar to nuclear protein-NHP2-like protein (LOC100040177), mRNA [XM_001474344]                                                | -0.29                 | 0.034   | 0.491           |
| Gm9856                      | BC011411                    | gb Mus musculus transmembrane protein 42, mRNA (cDNA clone IMAGE:2651504), with apparent retained intron. [BC011411]                                        | -0.29                 | 0.028   | 0.475           |
| chr1:175705225-175717250_F  | chr1:175705225-175717250_F  | lincRNA:chr1:175705225-175717250 forward strand                                                                                                             | -0.29                 | 0.041   | 0.505           |
| Dnajc24                     | NM_026992                   | ref Mus musculus DnaJ (Hsp40) homolog, subfamily C, member 24 (Dnajc24), mRNA [NM_026992]                                                                   | -0.29                 | 0.038   | 0.499           |
| chr11:117835849-117842574_R | chr11:117835849-117842574_R | lincRNA:chr11:117835849-117842574 reverse strand                                                                                                            | -0.29                 | 0.032   | 0.486           |
| Hspa14                      | NM_015765                   | ref Mus musculus heat shock protein 14 (Hspa14), transcript variant 1, mRNA [NM_015765]                                                                     | -0.29                 | 0.045   | 0.513           |
| Ak1                         | NM_021515                   | ref Mus musculus adenylate kinase 1 (Ak1), mRNA [NM_021515]                                                                                                 | -0.29                 | 0.034   | 0.491           |
| Tm9sf4                      | NM_133847                   | ref Mus musculus transmembrane 9 superfamily protein member 4 (Tm9sf4), mRNA [NM_133847]                                                                    | -0.29                 | 0.010   | 0.401           |
| chrX:135882029-135892277_R  | chrX:135882029-135892277_R  | lincRNA:chrX:135882029-135892277 reverse strand                                                                                                             | -0.29                 | 0.017   | 0.433           |
| Nmnat1                      | NM_133435                   | ref Mus musculus nicotinamide nucleotide adenyltransferase 1 (Nmnat1), mRNA [NM_133435]                                                                     | -0.29                 | 0.042   | 0.508           |
| LOC100045797                | XM_001474950                | ref PREDICTED: Mus musculus hypothetical protein LOC100045797 (LOC100045797), mRNA [XM_001474950]                                                           | -0.29                 | 0.048   | 0.516           |
| chr18:84735774-84760824_F   | chr18:84735774-84760824_F   | lincRNA:chr18:84735774-84760824 forward strand                                                                                                              | -0.29                 | 0.048   | 0.518           |
| B930041F14Rik               | NM_178699                   | ref Mus musculus RIKEN cDNA B930041F14 gene (B930041F14Rik), mRNA [NM_178699]                                                                               | -0.30                 | 0.043   | 0.510           |
| Ikzf4                       | NM_011772                   | ref Mus musculus IKAROS family zinc finger 4 (Ikzf4), mRNA [NM_011772]                                                                                      | -0.30                 | 0.043   | 0.509           |
| ENSMUST00000051301          | ENSMUST00000051301          | ens purine rich element binding protein A Gene [Source:MGI (curated);Acc:MGI:103079] [ENSMUST00000051301]                                                   | -0.30                 | 0.029   | 0.477           |
| Shf                         | NM_001013829                | ref Mus musculus Src homology 2 domain containing F (Shf), mRNA [NM_001013829]                                                                              | -0.30                 | 0.034   | 0.491           |
| Nsun6                       | NM_001165941                | ref Mus musculus NOL1/NOP2/Sun domain family member 6 (Nsun6), transcript variant 1, mRNA [NM_001165941]                                                    | -0.30                 | 0.018   | 0.435           |
| Dgat2                       | NM_026384                   | ref Mus musculus diacylglycerol O-acyltransferase 2 (Dgat2), mRNA [NM_026384]                                                                               | -0.30                 | 0.044   | 0.512           |
| Pdpf                        | NM_025598                   | ref Mus musculus pancreatic progenitor cell differentiation and proliferation factor homolog (zebrafish)RIKEN cDNA 2700038C09 gene (Pdpf), mRNA [NM_025598] | -0.30                 | 0.045   | 0.513           |
| Nagk                        | NM_019542                   | ref Mus musculus N-acetylglucosamine kinase (Nagk), transcript variant 1, mRNA [NM_019542]                                                                  | -0.30                 | 0.021   | 0.448           |
| Hmgn3                       | NM_175074                   | ref Mus musculus high mobility group nucleosomal binding domain 3 (Hmgn3), transcript variant b, mRNA [NM_175074]                                           | -0.30                 | 0.036   | 0.495           |
| Steap3                      | NM_001085409                | ref Mus musculus STEAP family member 3 (Steap3), transcript variant 1, mRNA [NM_001085409]                                                                  | -0.30                 | 0.039   | 0.501           |
| Adh5                        | NM_007410                   | ref Mus musculus alcohol dehydrogenase 5 (class III), chi polypeptide (Adh5), mRNA [NM_007410]                                                              | -0.30                 | 0.031   | 0.483           |
| Naip2                       | NM_010872                   | ref Mus musculus NLR family, apoptosis inhibitory protein 2 (Naip2), transcript variant 1, mRNA [NM_010872]                                                 | -0.30                 | 0.044   | 0.513           |

Online Supplemental Table IV: mG4H-STZ Only

| Gene Symbol                | RefSeq                     | Description                                                                                                                                                    | logFC<br>mG4H-<br>STZ | P-value | Adj.<br>P-value |
|----------------------------|----------------------------|----------------------------------------------------------------------------------------------------------------------------------------------------------------|-----------------------|---------|-----------------|
| Gm14326                    | NM_001190302               | ref Mus musculus predicted gene 14326 (Gm14326), mRNA [NM_001190302]                                                                                           | -0.30                 | 0.024   | 0.459           |
| Olf1489                    | NM_146635                  | ref Mus musculus olfactory receptor 1489 (Olf1489), mRNA [NM_146635]                                                                                           | -0.30                 | 0.023   | 0.456           |
| Hebp1                      | NM_013546                  | ref Mus musculus heme binding protein 1 (Hebp1), mRNA [NM_013546]                                                                                              | -0.31                 | 0.029   | 0.477           |
| Ankmy2                     | NM_146033                  | ref Mus musculus ankyrin repeat and MYND domain containing 2 (Ankmy2), mRNA [NM_146033]                                                                        | -0.31                 | 0.032   | 0.484           |
| 1110006G14Rik              | ENSMUST00000032900         | ens RIKEN cDNA 1110006G14 gene Gene [Source:MGI Symbol;Acc:MGI:1915719] [ENSMUST00000032900]                                                                   | -0.31                 | 0.047   | 0.516           |
| chr9:27148989-27155714_F   | chr9:27148989-27155714_F   | lincRNA:chr9:27148989-27155714 forward strand                                                                                                                  | -0.31                 | 0.040   | 0.503           |
| Kcnk4                      | NM_008431                  | ref Mus musculus potassium channel, subfamily K, member 4 (Kcnk4), mRNA [NM_008431]                                                                            | -0.31                 | 0.036   | 0.495           |
| ENSMUST00000103635         | ENSMUST00000103635         | ens TRADV14D-3 Fragment [Source:UniProtKB/TrEMBL;Acc:Q5R1E9] [ENSMUST00000103635]                                                                              | -0.31                 | 0.040   | 0.502           |
| Cplx4                      | NM_145493                  | ref Mus musculus complexin 4 (Cplx4), mRNA [NM_145493]                                                                                                         | -0.31                 | 0.039   | 0.500           |
| D330012F22Rik              | NM_178752                  | ref Mus musculus RIKEN cDNA D330012F22 gene (D330012F22Rik), mRNA [NM_178752]                                                                                  | -0.31                 | 0.040   | 0.502           |
| Zdhhc2                     | ENSMUST00000049389         | ens zinc finger, DHHC domain containing 2 Gene [Source:MGI (curated);Acc:MGI:1923452] [ENSMUST00000049389]                                                     | -0.31                 | 0.023   | 0.453           |
| Gm16506                    | XM_001472163               | ref PREDICTED: Mus musculus hypothetical LOC673132 (LOC673132), mRNA [XM_001472163]                                                                            | -0.31                 | 0.017   | 0.435           |
| Dbx1                       | NM_001005232               | ref Mus musculus developing brain homeobox 1 (Dbx1), mRNA [NM_001005232]                                                                                       | -0.31                 | 0.049   | 0.518           |
| Rasal3                     | NM_178785                  | ref Mus musculus RAS protein activator like 3 (Rasal3), mRNA [NM_178785]                                                                                       | -0.31                 | 0.033   | 0.487           |
| Apbb2                      | NM_009686                  | ref Mus musculus amyloid beta (A4) precursor protein-binding, family B, member 2 (Apbb2), mRNA [NM_009686]                                                     | -0.31                 | 0.036   | 0.495           |
| chr8:113968152-113973727_R | chr8:113968152-113973727_R | lincRNA:chr8:113968152-113973727 reverse strand                                                                                                                | -0.31                 | 0.034   | 0.492           |
| chr7:77555482-77634858_F   | chr7:77555482-77634858_F   | lincRNA:chr7:77555482-77634858 forward strand                                                                                                                  | -0.32                 | 0.050   | 0.520           |
| Gm8443                     | XM_976962                  | ref PREDICTED: Mus musculus predicted gene, EG667072 (EG667072), mRNA [XM_976962]                                                                              | -0.32                 | 0.046   | 0.513           |
| Cisd3                      | NM_001085500               | ref Mus musculus CDGSH iron sulfur domain 3 (Cisd3), mRNA [NM_001085500]                                                                                       | -0.32                 | 0.011   | 0.406           |
| chr1:85036677-85038530_R   | chr1:85036677-85038530_R   | lincRNA:chr1:85036677-85038530 reverse strand                                                                                                                  | -0.32                 | 0.044   | 0.512           |
| 9430078G10Rik              | XR_035208                  | ref PREDICTED: Mus musculus RIKEN cDNA 9430078G10 gene (9430078G10Rik), misc RNA [XR_035208]                                                                   | -0.32                 | 0.019   | 0.441           |
| 4930404N11Rik              | NM_001014836               | ref Mus musculus RIKEN cDNA 4930404N11 gene (4930404N11Rik), mRNA [NM_001014836]                                                                               | -0.32                 | 0.021   | 0.448           |
| Qrfpr                      | NM_198192                  | ref Mus musculus pyroglutamylated RFamide peptide receptor (Qrfpr), mRNA [NM_198192]                                                                           | -0.32                 | 0.019   | 0.441           |
| Tmem170                    | NM_025781                  | ref Mus musculus transmembrane protein 170 (Tmem170), mRNA [NM_025781]                                                                                         | -0.32                 | 0.042   | 0.508           |
| Nrip2                      | NM_021717                  | ref Mus musculus nuclear receptor interacting protein 2 (Nrip2), transcript variant 2, mRNA [NM_021717]                                                        | -0.32                 | 0.048   | 0.516           |
| Tmem14a                    | NM_029398                  | ref Mus musculus transmembrane protein 14A (Tmem14a), mRNA [NM_029398]                                                                                         | -0.32                 | 0.034   | 0.493           |
| Me2                        | NM_145494                  | ref Mus musculus malic enzyme 2, NAD(+)-dependent, mitochondrial (Me2), nuclear gene encoding mitochondrial protein, mRNA [NM_145494]                          | -0.32                 | 0.042   | 0.509           |
| 5033421B08Rik              | AK050516                   | gb Mus musculus adult pancreas islet cells cDNA, RIKEN full-length enriched library, clone:C820006M04 product:unclassifiable, full insert sequence. [AK050516] | -0.32                 | 0.031   | 0.481           |

Online Supplemental Table IV: mG4H-STZ Only

| Gene Symbol                 | RefSeq                      | Description                                                                                                                            | logFC<br>mG4H-<br>STZ | P-value | Adj.<br>P-value |
|-----------------------------|-----------------------------|----------------------------------------------------------------------------------------------------------------------------------------|-----------------------|---------|-----------------|
| Kif5a                       | NM_001039000                | ref Mus musculus kinesin family member 5A (Kif5a), transcript variant 1, mRNA [NM_001039000]                                           | -0.32                 | 0.040   | 0.502           |
| chr11:95644899-95658549_R   | chr11:95644899-95658549_R   | lincRNA:chr11:95644899-95658549 reverse strand                                                                                         | -0.32                 | 0.046   | 0.513           |
| chr1:166985480-166986024_R  | chr1:166985480-166986024_R  | lincRNA:chr1:166985480-166986024 reverse strand                                                                                        | -0.32                 | 0.050   | 0.520           |
| chr15:84737071-84753414_R   | chr15:84737071-84753414_R   | lincRNA:chr15:84737071-84753414 reverse strand                                                                                         | -0.32                 | 0.045   | 0.513           |
| LOC100046982                | XM_001477182                | ref PREDICTED: Mus musculus hypothetical protein LOC100046982 (LOC100046982), mRNA [XM_001477182]                                      | -0.32                 | 0.035   | 0.494           |
| chr2:33496712-33501183_F    | chr2:33496712-33501183_F    | lincRNA:chr2:33496712-33501183 forward strand                                                                                          | -0.32                 | 0.023   | 0.454           |
| Mrpl35                      | NM_025430                   | ref Mus musculus mitochondrial ribosomal protein L35 (Mrpl35), nuclear gene encoding mitochondrial protein, mRNA [NM_025430]           | -0.32                 | 0.045   | 0.513           |
| 1700113122Rik               | NM_026865                   | ref Mus musculus RIKEN cDNA 1700113122 gene (1700113122Rik), mRNA [NM_026865]                                                          | -0.32                 | 0.032   | 0.486           |
| ENSMUST0000011274           | ENSMUST0000011274           | ens PR domain containing 11 Gene [Source:MGI (curated);Acc:MGI:2685553] [ENSMUST0000011274]                                            | -0.33                 | 0.016   | 0.426           |
| Gm3932                      | XM_001479076                | ref PREDICTED: Mus musculus hypothetical protein LOC100042616 (LOC100042616), mRNA [XM_001479076]                                      | -0.33                 | 0.041   | 0.505           |
| LOC100045192                | XM_001473826                | ref PREDICTED: Mus musculus similar to Pdxx protein (LOC100045192), mRNA [XM_001473826]                                                | -0.33                 | 0.045   | 0.513           |
| Angptl6                     | NM_145154                   | ref Mus musculus angiopoietin-like 6 (Angptl6), mRNA [NM_145154]                                                                       | -0.33                 | 0.039   | 0.499           |
| Mtfmt                       | NM_027134                   | ref Mus musculus mitochondrial methionyl-tRNA formyltransferase (Mtfmt), nuclear gene encoding mitochondrial protein, mRNA [NM_027134] | -0.33                 | 0.046   | 0.513           |
| chr4:131905739-131910814_F  | chr4:131905739-131910814_F  | lincRNA:chr4:131905739-131910814 forward strand                                                                                        | -0.33                 | 0.050   | 0.520           |
| Gm2239                      | XM_001472897                | ref PREDICTED: Mus musculus hypothetical protein LOC100039445 (LOC100039445), mRNA [XM_001472897]                                      | -0.33                 | 0.026   | 0.468           |
| chr12:110944403-110988678_R | chr12:110944403-110988678_R | lincRNA:chr12:110944403-110988678 reverse strand                                                                                       | -0.33                 | 0.023   | 0.453           |
| chr17:27877526-27878437_F   | chr17:27877526-27878437_F   | lincRNA:chr17:27877526-27878437 forward strand                                                                                         | -0.33                 | 0.043   | 0.510           |
| chr4:126009815-126015875_F  | chr4:126009815-126015875_F  | lincRNA:chr4:126009815-126015875 forward strand                                                                                        | -0.33                 | 0.024   | 0.459           |
| Fv1                         | NM_010244                   | ref Mus musculus Friend virus susceptibility 1 (Fv1), mRNA [NM_010244]                                                                 | -0.33                 | 0.024   | 0.459           |
| chr15:43363046-43364763_F   | chr15:43363046-43364763_F   | lincRNA:chr15:43363046-43364763 forward strand                                                                                         | -0.33                 | 0.025   | 0.464           |
| Iqce                        | NM_028833                   | ref Mus musculus IQ motif containing E (Iqce), mRNA [NM_028833]                                                                        | -0.33                 | 0.025   | 0.467           |
| Tex28                       | NM_001126488                | ref Mus musculus testis expressed 28 (Tex28), mRNA [NM_001126488]                                                                      | -0.33                 | 0.049   | 0.518           |
| chr6:23105525-23118900_F    | chr6:23105525-23118900_F    | lincRNA:chr6:23105525-23118900 forward strand                                                                                          | -0.33                 | 0.024   | 0.458           |
| Gzmg                        | NM_010375                   | ref Mus musculus granzyme G (Gzmg), mRNA [NM_010375]                                                                                   | -0.33                 | 0.044   | 0.511           |
| Tmem223                     | NM_025791                   | ref Mus musculus transmembrane protein 223 (Tmem223), mRNA [NM_025791]                                                                 | -0.33                 | 0.021   | 0.449           |
| 2900005J15Rik               | NR_027851                   | ref Mus musculus RIKEN cDNA 2900005J15 gene (2900005J15Rik), non-coding RNA [NR_027851]                                                | -0.33                 | 0.020   | 0.447           |
| Zfp454                      | NM_172794                   | ref Mus musculus zinc finger protein 454 (Zfp454), mRNA [NM_172794]                                                                    | -0.33                 | 0.012   | 0.408           |
| ENSMUST00000152206          | ENSMUST00000152206          | ens CUB and Sushi multiple domains 2 Gene [Source:MGI (curated);Acc:MGI:2386401] [ENSMUST00000152206]                                  | -0.33                 | 0.047   | 0.515           |
| Mapk13                      | NM_011950                   | ref Mus musculus mitogen-activated protein kinase 13 (Mapk13), mRNA [NM_011950]                                                        | -0.33                 | 0.025   | 0.465           |

Online Supplemental Table IV: mG4H-STZ Only

| Gene Symbol                 | RefSeq                      | Description                                                                                                                      | logFC<br>mG4H-<br>STZ | P-value | Adj.<br>P-value |
|-----------------------------|-----------------------------|----------------------------------------------------------------------------------------------------------------------------------|-----------------------|---------|-----------------|
| Naprt1                      | NM_172607                   | ref Mus musculus nicotinate phosphoribosyltransferase domain containing 1 (Naprt1), mRNA [NM_172607]                             | -0.33                 | 0.017   | 0.435           |
| ENSMUST00000116196          | ENSMUST00000116196          | ens Myoglobin [Source:UniProtKB/TrEMBL;Acc:Q61936] [ENSMUST00000116196]                                                          | -0.33                 | 0.046   | 0.513           |
| ENSMUST00000117253          | ENSMUST00000117253          | ens latrophilin 3 Gene [Source:MGI (curated);Acc:MGI:2441950] [ENSMUST00000117253]                                               | -0.33                 | 0.030   | 0.477           |
| chr7:28592214-28605984_F    | chr7:28592214-28605984_F    | lincRNA:chr7:28592214-28605984 forward strand                                                                                    | -0.33                 | 0.047   | 0.515           |
| chr6:5311375-5328075_R      | chr6:5311375-5328075_R      | lincRNA:chr6:5311375-5328075 reverse strand                                                                                      | -0.33                 | 0.048   | 0.516           |
| Mfsd7a                      | NM_172883                   | ref Mus musculus major facilitator superfamily domain containing 7A (Mfsd7a), mRNA [NM_172883]                                   | -0.33                 | 0.047   | 0.515           |
| LOC100044731                | XM_001472942                | ref PREDICTED: Mus musculus similar to EF hand domain family, member B (LOC100044731), mRNA [XM_001472942]                       | -0.33                 | 0.038   | 0.499           |
| Nudt16l1                    | NM_025839                   | ref Mus musculus nudix (nucleoside diphosphate linked moiety X)-type motif 16-like 1 (Nudt16l1), mRNA [NM_025839]                | -0.33                 | 0.021   | 0.448           |
| chr3:30099759-30133959_R    | chr3:30099759-30133959_R    | lincRNA:chr3:30099759-30133959 reverse strand                                                                                    | -0.33                 | 0.031   | 0.482           |
| Dido1                       | NM_177852                   | ref Mus musculus death inducer-obliterator 1 (Dido1), transcript variant 2, mRNA [NM_177852]                                     | -0.33                 | 0.047   | 0.515           |
| Pdgfc                       | NM_019971                   | ref Mus musculus platelet-derived growth factor, C polypeptide (Pdgfc), mRNA [NM_019971]                                         | -0.33                 | 0.010   | 0.400           |
| Efcab1                      | NM_025769                   | ref Mus musculus EF hand calcium binding domain 1 (Efcab1), mRNA [NM_025769]                                                     | -0.33                 | 0.033   | 0.489           |
| Bmp5                        | NM_007555                   | ref Mus musculus bone morphogenetic protein 5 (Bmp5), mRNA [NM_007555]                                                           | -0.33                 | 0.048   | 0.518           |
| Strc                        | NM_080459                   | ref Mus musculus stereocilin (Strc), mRNA [NM_080459]                                                                            | -0.33                 | 0.042   | 0.508           |
| Tspan6                      | NM_019656                   | ref Mus musculus tetraspanin 6 (Tspan6), mRNA [NM_019656]                                                                        | -0.34                 | 0.047   | 0.515           |
| LOC100048865                | XM_001474385                | ref PREDICTED: Mus musculus hypothetical protein LOC100048865 (LOC100048865), mRNA [XM_001474385]                                | -0.34                 | 0.048   | 0.516           |
| Tceal6                      | NM_025355                   | ref Mus musculus transcription elongation factor A (SII)-like 6 (Tceal6), mRNA [NM_025355]                                       | -0.34                 | 0.046   | 0.513           |
| Gm3993                      | XM_001478694                | ref PREDICTED: Mus musculus similar to Predicted gene, EG245297 (LOC100042727), mRNA [XM_001478694]                              | -0.34                 | 0.050   | 0.520           |
| ENSMUST00000055275          | ENSMUST00000055275          | ens kinesin family member 23 Gene [Source:MGI Symbol;Acc:MGI:1919069] [ENSMUST00000055275]                                       | -0.34                 | 0.040   | 0.502           |
| Phc3                        | NM_153421                   | ref Mus musculus polyhomeotic-like 3 (Drosophila) (Phc3), transcript variant 2, mRNA [NM_153421]                                 | -0.34                 | 0.043   | 0.509           |
| chr13:108548345-108679004_F | chr13:108548345-108679004_F | lincRNA:chr13:108548345-108679004 forward strand                                                                                 | -0.34                 | 0.049   | 0.519           |
| LOC100047875                | XM_001479044                | ref PREDICTED: Mus musculus similar to Hspd1 protein (LOC100047875), mRNA [XM_001479044]                                         | -0.34                 | 0.016   | 0.426           |
| Tnfrsf14                    | NM_178931                   | ref Mus musculus tumor necrosis factor receptor superfamily, member 14 (herpesvirus entry mediator) (Tnfrsf14), mRNA [NM_178931] | -0.34                 | 0.027   | 0.472           |
| Snx16                       | NM_029068                   | ref Mus musculus sorting nexin 16 (Snx16), transcript variant 1, mRNA [NM_029068]                                                | -0.34                 | 0.018   | 0.436           |
| 1700045I19Rik               | NR_003640                   | ref Mus musculus RIKEN cDNA 1700045I19 gene (1700045I19Rik), non-coding RNA [NR_003640]                                          | -0.34                 | 0.029   | 0.477           |
| Gm347                       | NM_001005420                | ref Mus musculus predicted gene 347 (Gm347), mRNA [NM_001005420]                                                                 | -0.34                 | 0.038   | 0.499           |
| Sdsl                        | NM_133902                   | ref Mus musculus serine dehydratase-like (Sdsl), mRNA [NM_133902]                                                                | -0.34                 | 0.026   | 0.469           |
| chr17:79042382-79051807_F   | chr17:79042382-79051807_F   | lincRNA:chr17:79042382-79051807 forward strand                                                                                   | -0.34                 | 0.050   | 0.519           |
| chr16:93121505-93142255_F   | chr16:93121505-93142255_F   | lincRNA:chr16:93121505-93142255 forward strand                                                                                   | -0.34                 | 0.046   | 0.513           |



Online Supplemental Table IV: mG4H-STZ Only

| Gene Symbol                 | RefSeq                      | Description                                                                                                             | logFC<br>mG4H-<br>STZ | P-value | Adj.<br>P-value |
|-----------------------------|-----------------------------|-------------------------------------------------------------------------------------------------------------------------|-----------------------|---------|-----------------|
| Gm4122                      | XM_001478083                | ref PREDICTED: Mus musculus similar to RNP particle component (LOC100047272), mRNA [XM_001478083]                       | -0.34                 | 0.044   | 0.512           |
| Tdpz3                       | NM_207271                   | ref Mus musculus TD and POZ domain containing 3 (Tdpz3), mRNA [NM_207271]                                               | -0.34                 | 0.036   | 0.495           |
| Hs6st2                      | NM_001077202                | ref Mus musculus heparan sulfate 6-O-sulfotransferase 2 (Hs6st2), transcript variant 1, mRNA [NM_001077202]             | -0.34                 | 0.019   | 0.439           |
| Il17d                       | NM_145837                   | ref Mus musculus interleukin 17D (Il17d), mRNA [NM_145837]                                                              | -0.34                 | 0.027   | 0.471           |
| chr14:78214602-78226287_F   | chr14:78214602-78226287_F   | lincRNA:chr14:78214602-78226287 forward strand                                                                          | -0.34                 | 0.029   | 0.477           |
| Rad9                        | NM_011237                   | ref Mus musculus RAD9 homolog (S. pombe) (Rad9), mRNA [NM_011237]                                                       | -0.34                 | 0.017   | 0.435           |
| Krtap16-7                   | NM_028621                   | ref Mus musculus keratin associated protein 16-7 (Krtap16-7), mRNA [NM_028621]                                          | -0.34                 | 0.029   | 0.477           |
| Hist1h2ah                   | NM_175659                   | ref Mus musculus histone cluster 1, H2ah (Hist1h2ah), mRNA [NM_175659]                                                  | -0.34                 | 0.049   | 0.518           |
| chr10:120336296-120354471_F | chr10:120336296-120354471_F | lincRNA:chr10:120336296-120354471 forward strand                                                                        | -0.34                 | 0.021   | 0.448           |
| chr10:18036490-18059965_R   | chr10:18036490-18059965_R   | lincRNA:chr10:18036490-18059965 reverse strand                                                                          | -0.34                 | 0.012   | 0.409           |
| Pth                         | NM_020623                   | ref Mus musculus parathyroid hormone (Pth), mRNA [NM_020623]                                                            | -0.34                 | 0.044   | 0.512           |
| Aim2                        | NM_001013779                | ref Mus musculus absent in melanoma 2 (Aim2), mRNA [NM_001013779]                                                       | -0.35                 | 0.049   | 0.518           |
| Ttc5                        | NM_001080949                | ref Mus musculus tetratricopeptide repeat domain 5 (Ttc5), transcript variant 1, mRNA [NM_001080949]                    | -0.35                 | 0.015   | 0.421           |
| Dnajc24                     | NM_026992                   | ref Mus musculus DnaJ (Hsp40) homolog, subfamily C, member 24 (Dnajc24), mRNA [NM_026992]                               | -0.35                 | 0.040   | 0.502           |
| Zc4h2                       | NM_001003916                | ref Mus musculus zinc finger, C4H2 domain containing (Zc4h2), mRNA [NM_001003916]                                       | -0.35                 | 0.039   | 0.500           |
| chr16:91174611-91200786_F   | chr16:91174611-91200786_F   | lincRNA:chr16:91174611-91200786 forward strand                                                                          | -0.35                 | 0.024   | 0.458           |
| Ly86                        | NM_010745                   | ref Mus musculus lymphocyte antigen 86 (Ly86), mRNA [NM_010745]                                                         | -0.35                 | 0.028   | 0.476           |
| chr12:55417150-55418002_R   | chr12:55417150-55418002_R   | lincRNA:chr12:55417150-55418002 reverse strand                                                                          | -0.35                 | 0.043   | 0.509           |
| Exosc7                      | NM_001081188                | ref Mus musculus exosome component 7 (Exosc7), mRNA [NM_001081188]                                                      | -0.35                 | 0.042   | 0.507           |
| LOC433064                   | XM_001476964                | ref PREDICTED: Mus musculus similar to U-snRNP-associated cyclophilin (LOC433064), mRNA [XM_001476964]                  | -0.35                 | 0.029   | 0.477           |
| Zfp84                       | NM_023750                   | ref Mus musculus zinc finger protein 84 (Zfp84), mRNA [NM_023750]                                                       | -0.35                 | 0.036   | 0.496           |
| Bcl2l12                     | NM_029410                   | ref Mus musculus BCL2-like 12 (proline rich) (Bcl2l12), mRNA [NM_029410]                                                | -0.35                 | 0.040   | 0.504           |
| C7                          | XM_356827                   | ref PREDICTED: Mus musculus complement component 7 (C7), mRNA [XM_356827]                                               | -0.35                 | 0.011   | 0.407           |
| Tsr2                        | NM_001164578                | ref Mus musculus TSR2, 20S rRNA accumulation, homolog (S. cerevisiae) (Tsr2), transcript variant 1, mRNA [NM_001164578] | -0.35                 | 0.028   | 0.476           |
| chr5:33773842-33942967_F    | chr5:33773842-33942967_F    | lincRNA:chr5:33773842-33942967 forward strand                                                                           | -0.35                 | 0.013   | 0.412           |
| Ptptrt                      | NM_021464                   | ref Mus musculus protein tyrosine phosphatase, receptor type, T (Ptptrt), mRNA [NM_021464]                              | -0.35                 | 0.038   | 0.499           |
| Rngtt                       | NM_011884                   | ref Mus musculus RNA guanylyltransferase and 5'-phosphatase (Rngtt), mRNA [NM_011884]                                   | -0.35                 | 0.037   | 0.496           |
| Gm12171                     | NM_001163353                | ref Mus musculus predicted gene 12171 (Gm12171), mRNA [NM_001163353]                                                    | -0.35                 | 0.033   | 0.487           |
| Gm3806                      | XM_001478568                | ref PREDICTED: Mus musculus similar to LOC434536 protein (LOC100042368), mRNA [XM_001478568]                            | -0.35                 | 0.045   | 0.513           |
| Cpxm1                       | NM_019696                   | ref Mus musculus carboxypeptidase X 1 (M14 family) (Cpxm1), mRNA [NM_019696]                                            | -0.35                 | 0.012   | 0.412           |
| chr14:77511189-77522852_F   | chr14:77511189-77522852_F   | lincRNA:chr14:77511189-77522852 forward strand                                                                          | -0.35                 | 0.021   | 0.449           |



Online Supplemental Table IV: mG4H-STZ Only

| Gene Symbol                | RefSeq                     | Description                                                                                                                                                 | logFC<br>mG4H-<br>STZ | P-value | Adj.<br>P-value |
|----------------------------|----------------------------|-------------------------------------------------------------------------------------------------------------------------------------------------------------|-----------------------|---------|-----------------|
| Xaf1                       | NM_001037713               | ref Mus musculus XIAP associated factor 1 (Xaf1), mRNA [NM_001037713]                                                                                       | -0.35                 | 0.047   | 0.515           |
| Col4a4                     | NM_007735                  | ref Mus musculus collagen, type IV, alpha 4 (Col4a4), mRNA [NM_007735]                                                                                      | -0.35                 | 0.027   | 0.471           |
| chr17:74595885-74597555_R  | chr17:74595885-74597555_R  | lincRNA:chr17:74595885-74597555 reverse strand                                                                                                              | -0.35                 | 0.044   | 0.512           |
| Pdpf                       | NM_025598                  | ref Mus musculus pancreatic progenitor cell differentiation and proliferation factor homolog (zebrafish)RIKEN cDNA 2700038C09 gene (Pdpf), mRNA [NM_025598] | -0.35                 | 0.022   | 0.453           |
| Fam26f                     | NM_175449                  | ref Mus musculus family with sequence similarity 26, member F (Fam26f), mRNA [NM_175449]                                                                    | -0.35                 | 0.016   | 0.426           |
| chr7:111526943-111545093_R | chr7:111526943-111545093_R | lincRNA:chr7:111526943-111545093 reverse strand                                                                                                             | -0.35                 | 0.049   | 0.519           |
| Reps2                      | NM_178256                  | ref Mus musculus RALBP1 associated Eps domain containing protein 2 (Reps2), mRNA [NM_178256]                                                                | -0.35                 | 0.028   | 0.476           |
| chr4:126009815-126015875_F | chr4:126009815-126015875_F | lincRNA:chr4:126009815-126015875 forward strand                                                                                                             | -0.35                 | 0.041   | 0.505           |
| chr6:116092274-116144199_R | chr6:116092274-116144199_R | lincRNA:chr6:116092274-116144199 reverse strand                                                                                                             | -0.36                 | 0.038   | 0.499           |
| Smoc2                      | NM_022315                  | ref Mus musculus SPARC related modular calcium binding 2 (Smoc2), mRNA [NM_022315]                                                                          | -0.36                 | 0.021   | 0.448           |
| ENSMUST00000087544         | ENSMUST00000087544         | ens Putative uncharacterized protein Fragment [Source:UniProtKB/TrEMBL;Acc:Q8BSU0] [ENSMUST00000087544]                                                     | -0.36                 | 0.013   | 0.412           |
| chrX:93157194-93160542_R   | chrX:93157194-93160542_R   | lincRNA:chrX:93157194-93160542 reverse strand                                                                                                               | -0.36                 | 0.026   | 0.470           |
| 9330159F19Rik              | NM_001162537               | ref Mus musculus RIKEN cDNA 9330159F19 gene (9330159F19Rik), mRNA [NM_001162537]                                                                            | -0.36                 | 0.025   | 0.463           |
| chr17:17492400-17507525_F  | chr17:17492400-17507525_F  | lincRNA:chr17:17492400-17507525 forward strand                                                                                                              | -0.36                 | 0.041   | 0.505           |
| B4galnt4                   | NM_177897                  | ref Mus musculus beta-1,4-N-acetyl-galactosaminyl transferase 4 (B4galnt4), mRNA [NM_177897]                                                                | -0.36                 | 0.044   | 0.512           |
| chr1:35034564-35047457_R   | chr1:35034564-35047457_R   | lincRNA:chr1:35034564-35047457 reverse strand                                                                                                               | -0.36                 | 0.025   | 0.466           |
| chr3:51804655-51805883_R   | chr3:51804655-51805883_R   | lincRNA:chr3:51804655-51805883 reverse strand                                                                                                               | -0.36                 | 0.014   | 0.412           |
| A830049F12Rik              | XM_001475069               | ref PREDICTED: Mus musculus RIKEN cDNA A830049F12 gene (A830049F12Rik), mRNA [XM_001475069]                                                                 | -0.36                 | 0.038   | 0.498           |
| Arntl2                     | NM_172309                  | ref Mus musculus aryl hydrocarbon receptor nuclear translocator-like 2 (Arntl2), mRNA [NM_172309]                                                           | -0.36                 | 0.013   | 0.412           |
| A430034D21Rik              | AK042193                   | gb Mus musculus 3 days neonate thymus cDNA, RIKEN full-length enriched library, clone:A630068K02 product:unclassifiable, full insert sequence. [AK042193]   | -0.36                 | 0.039   | 0.501           |
| chr2:129416848-129417413_R | chr2:129416848-129417413_R | lincRNA:chr2:129416848-129417413 reverse strand                                                                                                             | -0.36                 | 0.037   | 0.497           |
| ENSMUST00000101104         | ENSMUST00000101104         | ens tumor necrosis factor receptor superfamily, member 13b Gene [Source:MGI (curated);Acc:MGI:1889411] [ENSMUST00000101104]                                 | -0.36                 | 0.042   | 0.507           |
| Olf1250                    | NM_146965                  | ref Mus musculus olfactory receptor 1250 (Olf1250), mRNA [NM_146965]                                                                                        | -0.36                 | 0.044   | 0.511           |
| Gm4320                     | XM_001479624               | ref PREDICTED: Mus musculus hypothetical protein LOC100043258 (LOC100043258), mRNA [XM_001479624]                                                           | -0.36                 | 0.015   | 0.423           |
| Gramd2                     | NM_001033498               | ref Mus musculus GRAM domain containing 2 (Gramd2), mRNA [NM_001033498]                                                                                     | -0.36                 | 0.034   | 0.493           |
| Slc37a2                    | NM_001145960               | ref Mus musculus solute carrier family 37 (glycerol-3-phosphate transporter), member 2 (Slc37a2), transcript variant 1, mRNA [NM_001145960]                 | -0.36                 | 0.016   | 0.426           |
| Zfp386                     | NM_001004066               | ref Mus musculus zinc finger protein 386 (Kruppel-like) (Zfp386), transcript variant 1, mRNA [NM_001004066]                                                 | -0.36                 | 0.037   | 0.496           |
| chr3:40966969-40976585_R   | chr3:40966969-40976585_R   | lincRNA:chr3:40966969-40976585 reverse strand                                                                                                               | -0.36                 | 0.046   | 0.513           |

Online Supplemental Table IV: mG4H-STZ Only

| Gene Symbol                | RefSeq                     | Description                                                                                                                                           | logFC<br>mG4H-<br>STZ | P-value | Adj.<br>P-value |
|----------------------------|----------------------------|-------------------------------------------------------------------------------------------------------------------------------------------------------|-----------------------|---------|-----------------|
| LOC674678                  | XM_976380                  | ref PREDICTED: Mus musculus similar to histone H4 (LOC674678), mRNA [XM_976380]                                                                       | -0.36                 | 0.042   | 0.509           |
| chr9:96635508-96654148_F   | chr9:96635508-96654148_F   | lincRNA:chr9:96635508-96654148 forward strand                                                                                                         | -0.37                 | 0.039   | 0.501           |
| ENSMUST00000054333         | ENSMUST00000054333         | ens RIKEN cDNA A130050O07 gene Gene [Source:MGI Symbol;Acc:MGI:2443458] [ENSMUST00000054333]                                                          | -0.37                 | 0.039   | 0.500           |
| Gm3990                     | XM_001478689               | ref PREDICTED: Mus musculus hypothetical protein LOC100042722 (LOC100042722), mRNA [XM_001478689]                                                     | -0.37                 | 0.046   | 0.513           |
| chr18:84303291-84303890_F  | chr18:84303291-84303890_F  | lincRNA:chr18:84303291-84303890 forward strand                                                                                                        | -0.37                 | 0.036   | 0.495           |
| chr1:138520504-138521227_R | chr1:138520504-138521227_R | lincRNA:chr1:138520504-138521227 reverse strand                                                                                                       | -0.37                 | 0.036   | 0.495           |
| chr8:67542714-67561694_R   | chr8:67542714-67561694_R   | lincRNA:chr8:67542714-67561694 reverse strand                                                                                                         | -0.37                 | 0.020   | 0.446           |
| Ros1                       | NM_011282                  | ref Mus musculus Ros1 proto-oncogene (Ros1), mRNA [NM_011282]                                                                                         | -0.37                 | 0.027   | 0.472           |
| LOC100047552               | XM_001478625               | ref PREDICTED: Mus musculus hypothetical protein LOC100047552 (LOC100047552), mRNA [XM_001478625]                                                     | -0.37                 | 0.023   | 0.453           |
| chr8:37582187-37621987_F   | chr8:37582187-37621987_F   | lincRNA:chr8:37582187-37621987 forward strand                                                                                                         | -0.37                 | 0.033   | 0.490           |
| chr8:24327427-24332452_R   | chr8:24327427-24332452_R   | lincRNA:chr8:24327427-24332452 reverse strand                                                                                                         | -0.37                 | 0.039   | 0.499           |
| Homer2                     | NM_011983                  | ref Mus musculus homer homolog 2 (Drosophila) (Homer2), transcript variant 1, mRNA [NM_011983]                                                        | -0.37                 | 0.045   | 0.513           |
| chr9:78368697-78369095_R   | chr9:78368697-78369095_R   | lincRNA:chr9:78368697-78369095 reverse strand                                                                                                         | -0.37                 | 0.019   | 0.437           |
| Dync2li1                   | NM_172256                  | ref Mus musculus dynein cytoplasmic 2 light intermediate chain 1 (Dync2li1), mRNA [NM_172256]                                                         | -0.37                 | 0.032   | 0.485           |
| ENSMUST00000116362         | ENSMUST00000116362         | ens Novel protein [Source:UniProtKB/TrEMBL;Acc:B1AX05] [ENSMUST00000116362]                                                                           | -0.37                 | 0.041   | 0.507           |
| Pion                       | NM_175437                  | ref Mus musculus pigeon homolog (Drosophila) (Pion), mRNA [NM_175437]                                                                                 | -0.37                 | 0.019   | 0.441           |
| 4930478K11Rik              | AK019647                   | gb Mus musculus adult male testis cDNA, RIKEN full-length enriched library, clone:4930478K11 product:unclassifiable, full insert sequence. [AK019647] | -0.37                 | 0.049   | 0.519           |
| BC049635                   | NM_177785                  | ref Mus musculus cDNA sequence BC049635 (BC049635), mRNA [NM_177785]                                                                                  | -0.37                 | 0.032   | 0.484           |
| chr5:122982442-123000053_F | chr5:122982442-123000053_F | lincRNA:chr5:122982442-123000053 forward strand                                                                                                       | -0.37                 | 0.023   | 0.455           |
| Rasgrp4                    | NM_145149                  | ref Mus musculus RAS guanyl releasing protein 4 (Rasgrp4), transcript variant 2, mRNA [NM_145149]                                                     | -0.37                 | 0.045   | 0.513           |
| chrX:6950444-6952293_R     | chrX:6950444-6952293_R     | lincRNA:chrX:6950444-6952293 reverse strand                                                                                                           | -0.37                 | 0.019   | 0.439           |
| Gm4764                     | XM_141682                  | ref PREDICTED: Mus musculus predicted gene, EG210457 (EG210457), mRNA [XM_141682]                                                                     | -0.37                 | 0.017   | 0.435           |
| chr3:127170996-127201096_R | chr3:127170996-127201096_R | lincRNA:chr3:127170996-127201096 reverse strand                                                                                                       | -0.37                 | 0.017   | 0.433           |
| Tns3                       | NM_001083587               | ref Mus musculus tensin 3 (Tns3), mRNA [NM_001083587]                                                                                                 | -0.37                 | 0.017   | 0.435           |
| Hspb11                     | NM_028394                  | ref Mus musculus heat shock protein family B (small), member 11 (Hspb11), mRNA [NM_028394]                                                            | -0.37                 | 0.029   | 0.477           |
| chr5:22056218-22206995_F   | chr5:22056218-22206995_F   | lincRNA:chr5:22056218-22206995 forward strand                                                                                                         | -0.37                 | 0.027   | 0.473           |
| chr1:193755364-193770539_F | chr1:193755364-193770539_F | lincRNA:chr1:193755364-193770539 forward strand                                                                                                       | -0.37                 | 0.042   | 0.508           |
| chr10:92238941-92283837_R  | chr10:92238941-92283837_R  | lincRNA:chr10:92238941-92283837 reverse strand                                                                                                        | -0.37                 | 0.010   | 0.403           |
| 5430405G05Rik              | NM_001160363               | ref Mus musculus RIKEN cDNA 5430405G05 gene (5430405G05Rik), mRNA [NM_001160363]                                                                      | -0.37                 | 0.014   | 0.412           |

Online Supplemental Table IV: mG4H-STZ Only

| Gene Symbol                | RefSeq                     | Description                                                                                                  | logFC<br>mG4H-<br>STZ | P-value | Adj.<br>P-value |
|----------------------------|----------------------------|--------------------------------------------------------------------------------------------------------------|-----------------------|---------|-----------------|
| chr16:21247571-21296945_R  | chr16:21247571-21296945_R  | lincRNA:chr16:21247571-21296945 reverse strand                                                               | -0.38                 | 0.006   | 0.369           |
| Rtp3                       | NM_153100                  | ref Mus musculus receptor transporter protein 3 (Rtp3), mRNA [NM_153100]                                     | -0.38                 | 0.016   | 0.425           |
| E130311K13Rik              | NM_177856                  | ref Mus musculus RIKEN cDNA E130311K13 gene (E130311K13Rik), mRNA [NM_177856]                                | -0.38                 | 0.037   | 0.496           |
| LOC100041256               | NM_001160142               | ref Mus musculus hypothetical protein LOC100041256 (LOC100041256), mRNA [NM_001160142]                       | -0.38                 | 0.043   | 0.510           |
| Cxx1c                      | NM_028375                  | ref Mus musculus CAAX box 1 homolog C (human) (Cxx1c), mRNA [NM_028375]                                      | -0.38                 | 0.038   | 0.499           |
| chr2:32950586-32984936_F   | chr2:32950586-32984936_F   | lincRNA:chr2:32950586-32984936 forward strand                                                                | -0.38                 | 0.032   | 0.485           |
| ENSMUST00000100552         | ENSMUST00000100552         | ens Putative uncharacterized protein [Source:UniProtKB/TrEMBL;Acc:Q3UV41] [ENSMUST00000100552]               | -0.38                 | 0.023   | 0.456           |
| chr5:67854954-67869163_R   | chr5:67854954-67869163_R   | lincRNA:chr5:67854954-67869163 reverse strand                                                                | -0.38                 | 0.043   | 0.511           |
| chr9:113648970-113715170_F | chr9:113648970-113715170_F | lincRNA:chr9:113648970-113715170 forward strand                                                              | -0.38                 | 0.022   | 0.452           |
| A730089K16Rik              | XR_035181                  | ref PREDICTED: Mus musculus RIKEN cDNA A730089K16 gene (A730089K16Rik), misc RNA [XR_035181]                 | -0.38                 | 0.023   | 0.453           |
| chr4:55465247-55494547_R   | chr4:55465247-55494547_R   | lincRNA:chr4:55465247-55494547 reverse strand                                                                | -0.38                 | 0.020   | 0.443           |
| chr9:118060025-118085050_R | chr9:118060025-118085050_R | lincRNA:chr9:118060025-118085050 reverse strand                                                              | -0.38                 | 0.023   | 0.453           |
| Lmx1a                      | NM_033652                  | ref Mus musculus LIM homeobox transcription factor 1 alpha (Lmx1a), mRNA [NM_033652]                         | -0.38                 | 0.015   | 0.418           |
| chr12:82495575-82516300_F  | chr12:82495575-82516300_F  | lincRNA:chr12:82495575-82516300 forward strand                                                               | -0.38                 | 0.031   | 0.482           |
| Prss35                     | NM_178738                  | ref Mus musculus protease, serine, 35 (Prss35), mRNA [NM_178738]                                             | -0.38                 | 0.042   | 0.508           |
| Cxcl14                     | NM_019568                  | ref Mus musculus chemokine (C-X-C motif) ligand 14 (Cxcl14), mRNA [NM_019568]                                | -0.38                 | 0.025   | 0.463           |
| chrX:45814752-45816313_R   | chrX:45814752-45816313_R   | lincRNA:chrX:45814752-45816313 reverse strand                                                                | -0.38                 | 0.047   | 0.514           |
| Cdrt4                      | NM_025496                  | ref Mus musculus CMT1A duplicated region transcript 4 (Cdrt4), mRNA [NM_025496]                              | -0.38                 | 0.011   | 0.407           |
| chr11:59189157-59220607_F  | chr11:59189157-59220607_F  | lincRNA:chr11:59189157-59220607 forward strand                                                               | -0.38                 | 0.038   | 0.499           |
| Prrg1                      | NM_027322                  | ref Mus musculus proline rich Gla (G-carboxyglutamic acid) 1 (Prrg1), transcript variant 1, mRNA [NM_027322] | -0.38                 | 0.043   | 0.509           |
| Slc30a6                    | NM_144798                  | ref Mus musculus solute carrier family 30 (zinc transporter), member 6 (Slc30a6), mRNA [NM_144798]           | -0.38                 | 0.049   | 0.519           |
| chr2:165802256-165805186_R | chr2:165802256-165805186_R | lincRNA:chr2:165802256-165805186 reverse strand                                                              | -0.38                 | 0.008   | 0.391           |
| Il12a                      | NM_001159424               | ref Mus musculus interleukin 12a (Il12a), transcript variant 1, mRNA [NM_001159424]                          | -0.38                 | 0.049   | 0.519           |
| Matn2                      | NM_016762                  | ref Mus musculus matrilin 2 (Matn2), mRNA [NM_016762]                                                        | -0.38                 | 0.014   | 0.416           |
| Robo2                      | NM_175549                  | ref Mus musculus roundabout homolog 2 (Drosophila) (Robo2), mRNA [NM_175549]                                 | -0.38                 | 0.019   | 0.439           |
| Kdelc2                     | NM_212445                  | ref Mus musculus KDEL (Lys-Asp-Glu-Leu) containing 2 (Kdelc2), mRNA [NM_212445]                              | -0.38                 | 0.047   | 0.515           |
| Igsf1                      | NM_177915                  | ref Mus musculus immunoglobulin superfamily, member 1 (Igsf1), transcript variant 2, mRNA [NM_177915]        | -0.38                 | 0.037   | 0.496           |
| Stk32c                     | NM_021302                  | ref Mus musculus serine/threonine kinase 32C (Stk32c), transcript variant 1, mRNA [NM_021302]                | -0.38                 | 0.034   | 0.493           |
| Mdfic                      | NM_175088                  | ref Mus musculus MyoD family inhibitor domain containing (Mdfic), mRNA [NM_175088]                           | -0.38                 | 0.038   | 0.499           |
| 8430419L09Rik              | NM_028982                  | ref Mus musculus RIKEN cDNA 8430419L09 gene (8430419L09Rik), mRNA [NM_028982]                                | -0.38                 | 0.046   | 0.513           |
| chrX:121675099-121675731_F | chrX:121675099-121675731_F | lincRNA:chrX:121675099-121675731 forward strand                                                              | -0.38                 | 0.050   | 0.519           |

Online Supplemental Table IV: mG4H-STZ Only

| Gene Symbol                 | RefSeq                      | Description                                                                                                                                           | logFC<br>mG4H-<br>STZ | P-value | Adj.<br>P-value |
|-----------------------------|-----------------------------|-------------------------------------------------------------------------------------------------------------------------------------------------------|-----------------------|---------|-----------------|
| chr17:22332475-22362150_R   | chr17:22332475-22362150_R   | lincRNA:chr17:22332475-22362150 reverse strand                                                                                                        | -0.38                 | 0.030   | 0.477           |
| Gnpnat1                     | NM_019425                   | ref Mus musculus glucosamine-phosphate N-acetyltransferase 1 (Gnpnat1), mRNA [NM_019425]                                                              | -0.38                 | 0.021   | 0.449           |
| chr7:134643616-134651441_R  | chr7:134643616-134651441_R  | lincRNA:chr7:134643616-134651441 reverse strand                                                                                                       | -0.39                 | 0.047   | 0.516           |
| chr12:110944403-110988678_R | chr12:110944403-110988678_R | lincRNA:chr12:110944403-110988678 reverse strand                                                                                                      | -0.39                 | 0.013   | 0.412           |
| chr15:12119755-12127230_F   | chr15:12119755-12127230_F   | lincRNA:chr15:12119755-12127230 forward strand                                                                                                        | -0.39                 | 0.044   | 0.512           |
| Gm5468                      | NR_027376                   | ref Mus musculus predicted gene 5468 (Gm5468), non-coding RNA [NR_027376]                                                                             | -0.39                 | 0.013   | 0.412           |
| 1700040D17Rik               | AK006651                    | gb Mus musculus adult male testis cDNA, RIKEN full-length enriched library, clone:1700040D17 product:unclassifiable, full insert sequence. [AK006651] | -0.39                 | 0.035   | 0.495           |
| chr18:36480559-36481146_R   | chr18:36480559-36481146_R   | lincRNA:chr18:36480559-36481146 reverse strand                                                                                                        | -0.39                 | 0.038   | 0.499           |
| ENSMUST00000098488          | ENSMUST00000098488          | ens splicing factor, arginine/serine-rich 11 Gene [Source:MGI (curated);Acc:MGI:1916457] [ENSMUST00000098488]                                         | -0.39                 | 0.035   | 0.494           |
| chr16:64758224-64765674_F   | chr16:64758224-64765674_F   | lincRNA:chr16:64758224-64765674 forward strand                                                                                                        | -0.39                 | 0.041   | 0.505           |
| Dnajb3                      | NM_008299                   | ref Mus musculus DnaJ (Hsp40) homolog, subfamily B, member 3 (Dnajb3), mRNA [NM_008299]                                                               | -0.39                 | 0.013   | 0.412           |
| 2610110G12Rik               | NM_001142744                | ref Mus musculus RIKEN cDNA 2610110G12 gene (2610110G12Rik), transcript variant 1, mRNA [NM_001142744]                                                | -0.39                 | 0.034   | 0.491           |
| Pex1                        | NM_027777                   | ref Mus musculus peroxisomal biogenesis factor 1 (Pex1), mRNA [NM_027777]                                                                             | -0.39                 | 0.018   | 0.435           |
| ENSMUST00000062256          | ENSMUST00000062256          | ens RIKEN cDNA 0610025J13 gene Gene [Source:MGI Symbol;Acc:MGI:1915618] [ENSMUST00000062256]                                                          | -0.39                 | 0.023   | 0.454           |
| chr8:83210957-83219451_F    | chr8:83210957-83219451_F    | lincRNA:chr8:83210957-83219451 forward strand                                                                                                         | -0.39                 | 0.045   | 0.513           |
| Rasgrp1                     | NM_011246                   | ref Mus musculus RAS guanyl releasing protein 1 (Rasgrp1), mRNA [NM_011246]                                                                           | -0.39                 | 0.036   | 0.495           |
| 4930567H17Rik               | NM_001033807                | ref Mus musculus RIKEN cDNA 4930567H17 gene (4930567H17Rik), mRNA [NM_001033807]                                                                      | -0.39                 | 0.007   | 0.377           |
| LOC100047266                | XM_001477769                | ref PREDICTED: Mus musculus hypothetical protein LOC100047266 (LOC100047266), mRNA [XM_001477769]                                                     | -0.39                 | 0.029   | 0.477           |
| 6720456H20Rik               | NM_172600                   | ref Mus musculus RIKEN cDNA 6720456H20 gene (6720456H20Rik), mRNA [NM_172600]                                                                         | -0.39                 | 0.039   | 0.500           |
| chr9:82991830-82999937_F    | chr9:82991830-82999937_F    | lincRNA:chr9:82991830-82999937 forward strand                                                                                                         | -0.39                 | 0.005   | 0.349           |
| chr12:82457625-82476325_R   | chr12:82457625-82476325_R   | lincRNA:chr12:82457625-82476325 reverse strand                                                                                                        | -0.39                 | 0.014   | 0.414           |
| Krt82                       | NM_053249                   | ref Mus musculus keratin 82 (Krt82), mRNA [NM_053249]                                                                                                 | -0.39                 | 0.004   | 0.313           |
| chr18:75501092-75501330_F   | chr18:75501092-75501330_F   | lincRNA:chr18:75501092-75501330 forward strand                                                                                                        | -0.39                 | 0.012   | 0.408           |
| Synpo2                      | NM_080451                   | ref Mus musculus synaptopodin 2 (Synpo2), mRNA [NM_080451]                                                                                            | -0.39                 | 0.045   | 0.513           |
| Olf1124                     | NM_147028                   | ref Mus musculus olfactory receptor 1124 (Olf1124), mRNA [NM_147028]                                                                                  | -0.39                 | 0.049   | 0.518           |
| Fndc7                       | NM_177091                   | ref Mus musculus fibronectin type III domain containing 7 (Fndc7), transcript variant 1, mRNA [NM_177091]                                             | -0.39                 | 0.039   | 0.499           |
| LOC100046898                | XM_001478127                | ref PREDICTED: Mus musculus similar to Cell division cycle 34 homolog (S. cerevisiae) (LOC100046898), mRNA [XM_001478127]                             | -0.39                 | 0.046   | 0.513           |
| 4933408A14Rik               | CA463412                    | gb AGENCOURT_10722575 NIH_MGC_169 Mus musculus cDNA clone IMAGE:6770805 5', mRNA sequence [CA463412]                                                  | -0.39                 | 0.022   | 0.453           |
| chr7:105964846-105965163_F  | chr7:105964846-105965163_F  | lincRNA:chr7:105964846-105965163 forward strand                                                                                                       | -0.40                 | 0.035   | 0.495           |

Online Supplemental Table IV: mG4H-STZ Only

| Gene Symbol                | RefSeq                     | Description                                                                                                                                                  | logFC<br>mG4H-<br>STZ | P-value | Adj.<br>P-value |
|----------------------------|----------------------------|--------------------------------------------------------------------------------------------------------------------------------------------------------------|-----------------------|---------|-----------------|
| chr3:121997064-122031218_F | chr3:121997064-122031218_F | lincRNA:chr3:121997064-122031218 forward strand                                                                                                              | -0.40                 | 0.004   | 0.312           |
| Kcnj15                     | NM_019664                  | ref Mus musculus potassium inwardly-rectifying channel, subfamily J, member 15 (Kcnj15), transcript variant 2, mRNA [NM_019664]                              | -0.40                 | 0.009   | 0.400           |
| 2010007H06Rik              | AK084979                   | gb Mus musculus 13 days embryo lung cDNA, RIKEN full-length enriched library, clone:D430021D02 product:unclassifiable, full insert sequence. [AK084979]      | -0.40                 | 0.047   | 0.515           |
| Xpo4                       | ENSMUST000000089482        | ens exportin 4 Gene [Source:MGI Symbol;Acc:MGI:1888526] [ENSMUST000000089482]                                                                                | -0.40                 | 0.017   | 0.433           |
| chr4:59264275-59287850_R   | chr4:59264275-59287850_R   | lincRNA:chr4:59264275-59287850 reverse strand                                                                                                                | -0.40                 | 0.031   | 0.480           |
| Trip11                     | BC025876                   | gb Mus musculus thyroid hormone receptor interactor 11, mRNA (cDNA clone IMAGE:5028242). [BC025876]                                                          | -0.40                 | 0.030   | 0.477           |
| Ccdc108                    | NM_001039495               | ref Mus musculus coiled-coil domain containing 108 (Ccdc108), mRNA [NM_001039495]                                                                            | -0.40                 | 0.042   | 0.507           |
| chr4:86267450-86277650_F   | chr4:86267450-86277650_F   | lincRNA:chr4:86267450-86277650 forward strand                                                                                                                | -0.40                 | 0.045   | 0.513           |
| Gbx1                       | NM_015739                  | ref Mus musculus gastrulation brain homeobox 1 (Gbx1), mRNA [NM_015739]                                                                                      | -0.40                 | 0.036   | 0.495           |
| 4930432L08Rik              | AK015294                   | gb Mus musculus adult male testis cDNA, RIKEN full-length enriched library, clone:4930432L08 product:unclassifiable, full insert sequence. [AK015294]        | -0.40                 | 0.044   | 0.512           |
| Insc                       | NM_173767                  | ref Mus musculus inscuteable homolog (Drosophila) (Insc), mRNA [NM_173767]                                                                                   | -0.40                 | 0.048   | 0.516           |
| Catsperb                   | NM_173023                  | ref Mus musculus cation channel, sperm-associated, beta (Catsperb), mRNA [NM_173023]                                                                         | -0.40                 | 0.037   | 0.498           |
| Card11                     | NM_175362                  | ref Mus musculus caspase recruitment domain family, member 11 (Card11), mRNA [NM_175362]                                                                     | -0.40                 | 0.011   | 0.407           |
| Ache                       | NM_009599                  | ref Mus musculus acetylcholinesterase (Ache), mRNA [NM_009599]                                                                                               | -0.40                 | 0.014   | 0.417           |
| chr6:28172545-28176170_R   | chr6:28172545-28176170_R   | lincRNA:chr6:28172545-28176170 reverse strand                                                                                                                | -0.40                 | 0.040   | 0.502           |
| Parp3                      | NM_145619                  | ref Mus musculus poly (ADP-ribose) polymerase family, member 3 (Parp3), mRNA [NM_145619]                                                                     | -0.40                 | 0.006   | 0.366           |
| chr13:38757503-38767928_R  | chr13:38757503-38767928_R  | lincRNA:chr13:38757503-38767928 reverse strand                                                                                                               | -0.40                 | 0.038   | 0.499           |
| Pbx1                       | NM_008783                  | ref Mus musculus pre B-cell leukemia transcription factor 1 (Pbx1), transcript variant b, mRNA [NM_008783]                                                   | -0.40                 | 0.043   | 0.511           |
| Epha8                      | NM_007939                  | ref Mus musculus Eph receptor A8 (Epha8), mRNA [NM_007939]                                                                                                   | -0.40                 | 0.037   | 0.497           |
| 9030411M13Rik              | AK018502                   | gb Mus musculus adult male colon cDNA, RIKEN full-length enriched library, clone:9030411M13 product:unclassifiable, full insert sequence. [AK018502]         | -0.40                 | 0.034   | 0.493           |
| Wdr89                      | NM_028203                  | ref Mus musculus WD repeat domain 89 (Wdr89), mRNA [NM_028203]                                                                                               | -0.40                 | 0.031   | 0.482           |
| Pgc                        | NM_025973                  | ref Mus musculus progastricsin (pepsinogen C) (Pgc), mRNA [NM_025973]                                                                                        | -0.40                 | 0.039   | 0.500           |
| Olf541                     | NM_146962                  | ref Mus musculus olfactory receptor 541 (Olf541), mRNA [NM_146962]                                                                                           | -0.40                 | 0.010   | 0.401           |
| Tas2r121                   | NM_207024                  | ref Mus musculus taste receptor, type 2, member 121 (Tas2r121), mRNA [NM_207024]                                                                             | -0.40                 | 0.034   | 0.493           |
| chr3:40966969-40976585_R   | chr3:40966969-40976585_R   | lincRNA:chr3:40966969-40976585 reverse strand                                                                                                                | -0.40                 | 0.009   | 0.394           |
| C430019N01Rik              | AK049529                   | gb Mus musculus 7 days embryo whole body cDNA, RIKEN full-length enriched library, clone:C430019N01 product:unclassifiable, full insert sequence. [AK049529] | -0.40                 | 0.043   | 0.510           |
| Ndufa4l2                   | NM_001098789               | ref Mus musculus NADH dehydrogenase (ubiquinone) 1 alpha subcomplex, 4-like 2 (Ndufa4l2), mRNA [NM_001098789]                                                | -0.40                 | 0.009   | 0.393           |
| Nkain1                     | NM_025998                  | ref Mus musculus Na+/K+ transporting ATPase interacting 1 (Nkain1), mRNA [NM_025998]                                                                         | -0.40                 | 0.046   | 0.513           |
| 6330439K17Rik              | NM_172859                  | ref Mus musculus RIKEN cDNA 6330439K17 gene (6330439K17Rik), mRNA [NM_172859]                                                                                | -0.40                 | 0.037   | 0.497           |



Online Supplemental Table IV: mG4H-STZ Only

| Gene Symbol                 | RefSeq                      | Description                                                                                              | logFC<br>mG4H-<br>STZ | P-value | Adj.<br>P-value |
|-----------------------------|-----------------------------|----------------------------------------------------------------------------------------------------------|-----------------------|---------|-----------------|
| Zfp111                      | NM_019940                   | ref Mus musculus zinc finger protein 111 (Zfp111), mRNA [NM_019940]                                      | -0.40                 | 0.026   | 0.470           |
| chr12:16003706-16022581_F   | chr12:16003706-16022581_F   | lincRNA:chr12:16003706-16022581 forward strand                                                           | -0.40                 | 0.028   | 0.474           |
| Mettl3                      | NM_019721                   | ref Mus musculus methyltransferase like 3 (Mettl3), mRNA [NM_019721]                                     | -0.40                 | 0.049   | 0.519           |
| chr15:102100397-102105872_R | chr15:102100397-102105872_R | lincRNA:chr15:102100397-102105872 reverse strand                                                         | -0.40                 | 0.044   | 0.512           |
| chr10:62347876-62374346_R   | chr10:62347876-62374346_R   | lincRNA:chr10:62347876-62374346 reverse strand                                                           | -0.40                 | 0.039   | 0.501           |
| Brix1                       | NM_026396                   | ref Mus musculus BRX1, biogenesis of ribosomes, homolog (S. cerevisiae) (Brix1), mRNA [NM_026396]        | -0.41                 | 0.046   | 0.513           |
| Eml6                        | NM_146016                   | ref Mus musculus echinoderm microtubule associated protein like 6 (Eml6), mRNA [NM_146016]               | -0.41                 | 0.033   | 0.488           |
| chr4:136871882-136872469_R  | chr4:136871882-136872469_R  | lincRNA:chr4:136871882-136872469 reverse strand                                                          | -0.41                 | 0.018   | 0.437           |
| chr17:45524689-45525320_R   | chr17:45524689-45525320_R   | lincRNA:chr17:45524689-45525320 reverse strand                                                           | -0.41                 | 0.023   | 0.456           |
| chr12:20240893-20435318_R   | chr12:20240893-20435318_R   | lincRNA:chr12:20240893-20435318 reverse strand                                                           | -0.41                 | 0.031   | 0.480           |
| Wdr72                       | NM_001033500                | ref Mus musculus WD repeat domain 72 (Wdr72), mRNA [NM_001033500]                                        | -0.41                 | 0.032   | 0.484           |
| Gm13241                     | XM_485486                   | ref PREDICTED: Mus musculus similar to Cdv3 protein (LOC433790), mRNA [XM_485486]                        | -0.41                 | 0.009   | 0.399           |
| Zfp784                      | NM_001039532                | ref Mus musculus zinc finger protein 784 (Zfp784), mRNA [NM_001039532]                                   | -0.41                 | 0.025   | 0.464           |
| Accn2                       | NM_009597                   | ref Mus musculus amiloride-sensitive cation channel 2, neuronal (Accn2), mRNA [NM_009597]                | -0.41                 | 0.048   | 0.516           |
| ENSMUST00000113646          | ENSMUST00000113646          | ens anthrax toxin receptor 1 Gene [Source:MGI Symbol;Acc:MGI:1916788] [ENSMUST00000113646]               | -0.41                 | 0.030   | 0.477           |
| ENSMUST00000072014          | ENSMUST00000072014          | ens Putative uncharacterized protein [Source:UniProtKB/TrEMBL;Acc:Q8BKS1] [ENSMUST00000072014]           | -0.41                 | 0.011   | 0.407           |
| chr9:96635508-96654148_F    | chr9:96635508-96654148_F    | lincRNA:chr9:96635508-96654148 forward strand                                                            | -0.41                 | 0.030   | 0.477           |
| chrX:93154123-93164481_F    | chrX:93154123-93164481_F    | lincRNA:chrX:93154123-93164481 forward strand                                                            | -0.41                 | 0.040   | 0.504           |
| H2-DMb2                     | NM_010388                   | ref Mus musculus histocompatibility 2, class II, locus Mb2 (H2-DMb2), mRNA [NM_010388]                   | -0.41                 | 0.049   | 0.519           |
| chr18:57124435-57134910_F   | chr18:57124435-57134910_F   | lincRNA:chr18:57124435-57134910 forward strand                                                           | -0.41                 | 0.047   | 0.515           |
| LOC100045319                | XM_001474051                | ref PREDICTED: Mus musculus hypothetical protein LOC100045319 (LOC100045319), mRNA [XM_001474051]        | -0.41                 | 0.034   | 0.493           |
| Eaf2                        | NM_001113401                | ref Mus musculus ELL associated factor 2 (Eaf2), transcript variant 2, mRNA [NM_001113401]               | -0.41                 | 0.022   | 0.453           |
| InsI5                       | NM_011831                   | ref Mus musculus insulin-like 5 (InsI5), mRNA [NM_011831]                                                | -0.41                 | 0.031   | 0.483           |
| B3galtI                     | NM_001081204                | ref Mus musculus beta 1,3-galactosyltransferase-like (B3galtI), mRNA [NM_001081204]                      | -0.41                 | 0.036   | 0.495           |
| Tm4sf20                     | NM_025453                   | ref Mus musculus transmembrane 4 L six family member 20 (Tm4sf20), mRNA [NM_025453]                      | -0.41                 | 0.039   | 0.500           |
| chr4:89088538-89130181_F    | chr4:89088538-89130181_F    | lincRNA:chr4:89088538-89130181 forward strand                                                            | -0.41                 | 0.048   | 0.516           |
| chr12:73789535-73799787_F   | chr12:73789535-73799787_F   | lincRNA:chr12:73789535-73799787 forward strand                                                           | -0.41                 | 0.026   | 0.470           |
| Zdhhc2                      | NM_178395                   | ref Mus musculus zinc finger, DHHC domain containing 2 (Zdhhc2), mRNA [NM_178395]                        | -0.41                 | 0.005   | 0.355           |
| Olfir298                    | NM_001011751                | ref Mus musculus olfactory receptor 298 (Olfir298), mRNA [NM_001011751]                                  | -0.41                 | 0.049   | 0.518           |
| ENSMUST00000103461          | ENSMUST00000103461          | ens Ig heavy chain V region M167 Precursor [Source:UniProtKB/Swiss-Prot;Acc:P01795] [ENSMUST00000103461] | -0.41                 | 0.019   | 0.439           |



Online Supplemental Table IV: mG4H-STZ Only

| Gene Symbol                | RefSeq                     | Description                                                                                                                                                          | logFC<br>mG4H-<br>STZ | P-value | Adj.<br>P-value |
|----------------------------|----------------------------|----------------------------------------------------------------------------------------------------------------------------------------------------------------------|-----------------------|---------|-----------------|
| Ptplad2                    | NM_025760                  | ref Mus musculus protein tyrosine phosphatase-like A domain containing 2 (Ptplad2), mRNA [NM_025760]                                                                 | -0.41                 | 0.002   | 0.281           |
| Gm15285                    | XR_032049                  | ref PREDICTED: Mus musculus similar to Electron transferring flavoprotein, alpha polypeptide (LOC100040640), misc RNA [XR_032049]                                    | -0.42                 | 0.023   | 0.456           |
| Cer1                       | NM_009887                  | ref Mus musculus cerberus 1 homolog (Xenopus laevis) (Cer1), mRNA [NM_009887]                                                                                        | -0.42                 | 0.031   | 0.482           |
| ENSMUST00000101131         | ENSMUST00000101131         | ens Putative uncharacterized protein [Source:UniProtKB/TrEMBL;Acc:Q3UR77] [ENSMUST00000101131]                                                                       | -0.42                 | 0.043   | 0.509           |
| chr13:74712775-74728450_R  | chr13:74712775-74728450_R  | lincRNA:chr13:74712775-74728450 reverse strand                                                                                                                       | -0.42                 | 0.043   | 0.509           |
| Scrn1                      | ENSMUST00000019268         | ens secernin 1 Gene [Source:MGI (curated);Acc:MGI:1917188] [ENSMUST00000019268]                                                                                      | -0.42                 | 0.031   | 0.482           |
| Brca2                      | NM_009765                  | ref Mus musculus breast cancer 2 (Brca2), transcript variant 2, mRNA [NM_009765]                                                                                     | -0.42                 | 0.037   | 0.497           |
| chr9:96673952-96674816_F   | chr9:96673952-96674816_F   | lincRNA:chr9:96673952-96674816 forward strand                                                                                                                        | -0.42                 | 0.043   | 0.510           |
| ENSMUST00000114154         | ENSMUST00000114154         | ens Ellis van Creveld gene homolog (human) Gene [Source:MGI (curated);Acc:MGI:1890596] [ENSMUST00000114154]                                                          | -0.42                 | 0.040   | 0.504           |
| chr10:72726649-72799726_R  | chr10:72726649-72799726_R  | lincRNA:chr10:72726649-72799726 reverse strand                                                                                                                       | -0.42                 | 0.024   | 0.458           |
| chr4:128207615-128242898_R | chr4:128207615-128242898_R | lincRNA:chr4:128207615-128242898 reverse strand                                                                                                                      | -0.42                 | 0.027   | 0.472           |
| Hs3st4                     | ENSMUST00000106437         | Unknown                                                                                                                                                              | -0.42                 | 0.044   | 0.512           |
| chr8:85609155-85615170_R   | chr8:85609155-85615170_R   | lincRNA:chr8:85609155-85615170 reverse strand                                                                                                                        | -0.42                 | 0.004   | 0.308           |
| ENSMUST00000097339         | ENSMUST00000097339         | ens Putative uncharacterized protein [Source:UniProtKB/TrEMBL;Acc:Q3UY6] [ENSMUST00000097339]                                                                        | -0.42                 | 0.037   | 0.496           |
| 5330431K02Rik              | AK019926                   | gb Mus musculus adult male pituitary gland cDNA, RIKEN full-length enriched library, clone:5330431K02 product:hypothetical protein, full insert sequence. [AK019926] | -0.42                 | 0.036   | 0.495           |
| Zscan22                    | NM_001001447               | ref Mus musculus zinc finger and SCAN domain containing 22 (Zscan22), mRNA [NM_001001447]                                                                            | -0.42                 | 0.049   | 0.518           |
| Trpc2                      | NM_011644                  | ref Mus musculus transient receptor potential cation channel, subfamily C, member 2 (Trpc2), transcript variant 1, mRNA [NM_011644]                                  | -0.42                 | 0.036   | 0.495           |
| chr9:24292762-24307562_R   | chr9:24292762-24307562_R   | lincRNA:chr9:24292762-24307562 reverse strand                                                                                                                        | -0.42                 | 0.017   | 0.431           |
| chr1:63163023-63180223_R   | chr1:63163023-63180223_R   | lincRNA:chr1:63163023-63180223 reverse strand                                                                                                                        | -0.42                 | 0.045   | 0.513           |
| chr15:85412264-85549139_R  | chr15:85412264-85549139_R  | lincRNA:chr15:85412264-85549139 reverse strand                                                                                                                       | -0.42                 | 0.009   | 0.398           |
| chr18:69923410-69965360_F  | chr18:69923410-69965360_F  | lincRNA:chr18:69923410-69965360 forward strand                                                                                                                       | -0.42                 | 0.036   | 0.496           |
| ENSMUST00000099340         | ENSMUST00000099340         | ens Putative uncharacterized protein [Source:UniProtKB/TrEMBL;Acc:Q3UKC4] [ENSMUST00000099340]                                                                       | -0.42                 | 0.041   | 0.506           |
| Spats2l                    | NM_144882                  | ref Mus musculus spermatogenesis associated, serine-rich 2-like (Spats2l), transcript variant 1, mRNA [NM_144882]                                                    | -0.42                 | 0.015   | 0.421           |
| LOC100046720               | XM_001476697               | ref PREDICTED: Mus musculus similar to Reproductive homeobox 11 (LOC100046720), mRNA [XM_001476697]                                                                  | -0.42                 | 0.047   | 0.515           |
| Hoxc8                      | NM_010466                  | ref Mus musculus homeobox C8 (Hoxc8), mRNA [NM_010466]                                                                                                               | -0.42                 | 0.037   | 0.496           |
| chr1:194659312-194661407_R | chr1:194659312-194661407_R | lincRNA:chr1:194659312-194661407 reverse strand                                                                                                                      | -0.42                 | 0.028   | 0.474           |
| Gm2598                     | XM_001474084               | ref PREDICTED: Mus musculus similar to Ubtf protein (LOC100040097), mRNA [XM_001474084]                                                                              | -0.42                 | 0.023   | 0.453           |

Online Supplemental Table IV: mG4H-STZ Only

| Gene Symbol                 | RefSeq                      | Description                                                                                                                                                | logFC<br>mG4H-<br>STZ | P-value | Adj.<br>P-value |
|-----------------------------|-----------------------------|------------------------------------------------------------------------------------------------------------------------------------------------------------|-----------------------|---------|-----------------|
| Lrba                        | NM_001077687                | ref Mus musculus LPS-responsive beige-like anchor (Lrba), transcript variant 3, mRNA [NM_001077687]                                                        | -0.42                 | 0.030   | 0.477           |
| chr4:119405156-119461821_F  | chr4:119405156-119461821_F  | lincRNA:chr4:119405156-119461821 forward strand                                                                                                            | -0.42                 | 0.040   | 0.503           |
| ENSMUST00000019901          | ENSMUST00000019901          | ref PREDICTED: Mus musculus gene model 221, (NCBI) (Gm221), mRNA [XM_136914]                                                                               | -0.42                 | 0.024   | 0.459           |
| chr11:22681800-22707775_F   | chr11:22681800-22707775_F   | lincRNA:chr11:22681800-22707775 forward strand                                                                                                             | -0.42                 | 0.006   | 0.369           |
| Nlrp9b                      | NM_194058                   | ref Mus musculus NLR family, pyrin domain containing 9B (Nlrp9b), mRNA [NM_194058]                                                                         | -0.42                 | 0.020   | 0.447           |
| Ppara                       | NM_011144                   | ref Mus musculus peroxisome proliferator activated receptor alpha (Ppara), transcript variant 1, mRNA [NM_011144]                                          | -0.42                 | 0.023   | 0.456           |
| chr8:128933150-128943375_F  | chr8:128933150-128943375_F  | lincRNA:chr8:128933150-128943375 forward strand                                                                                                            | -0.42                 | 0.046   | 0.513           |
| A430085C19                  | AK040305                    | gb Mus musculus 0 day neonate thymus cDNA, RIKEN full-length enriched library, clone:A430085C19 product:unclassifiable, full insert sequence. [AK040305]   | -0.42                 | 0.018   | 0.435           |
| chr14:28231577-28242027_F   | chr14:28231577-28242027_F   | lincRNA:chr14:28231577-28242027 forward strand                                                                                                             | -0.42                 | 0.008   | 0.393           |
| chr5:13125413-13310754_F    | chr5:13125413-13310754_F    | lincRNA:chr5:13125413-13310754 forward strand                                                                                                              | -0.42                 | 0.033   | 0.490           |
| chr14:20893694-20903726_R   | chr14:20893694-20903726_R   | lincRNA:chr14:20893694-20903726 reverse strand                                                                                                             | -0.42                 | 0.022   | 0.453           |
| chr17:84350367-84351803_R   | chr17:84350367-84351803_R   | lincRNA:chr17:84350367-84351803 reverse strand                                                                                                             | -0.43                 | 0.031   | 0.482           |
| Gm1141                      | NR_027801                   | ref Mus musculus predicted gene 1141 (Gm1141), non-coding RNA [NR_027801]                                                                                  | -0.43                 | 0.048   | 0.518           |
| Gm3119                      | XM_001475657                | ref PREDICTED: Mus musculus hypothetical protein LOC100041061 (LOC100041061), mRNA [XM_001475657]                                                          | -0.43                 | 0.011   | 0.407           |
| chr7:50509139-50526856_F    | chr7:50509139-50526856_F    | lincRNA:chr7:50509139-50526856 forward strand                                                                                                              | -0.43                 | 0.002   | 0.266           |
| Fam110b                     | NM_173426                   | ref Mus musculus family with sequence similarity 110, member B (Fam110b), mRNA [NM_173426]                                                                 | -0.43                 | 0.048   | 0.518           |
| Kcnmb4                      | NM_021452                   | ref Mus musculus potassium large conductance calcium-activated channel, subfamily M, beta member 4 (Kcnmb4), mRNA [NM_021452]                              | -0.43                 | 0.030   | 0.479           |
| ENSMUST00000079237          | ENSMUST00000079237          | ens zinc finger protein 125 Gene [Source:MGI Symbol;Acc:MGI:1336211] [ENSMUST00000079237]                                                                  | -0.43                 | 0.021   | 0.449           |
| A_55_P2078438               | A_55_P2078438               | Unknown                                                                                                                                                    | -0.43                 | 0.024   | 0.459           |
| Gnaz                        | NM_010311                   | ref Mus musculus guanine nucleotide binding protein, alpha z subunit (Gnaz), mRNA [NM_010311]                                                              | -0.43                 | 0.017   | 0.429           |
| chr13:107822042-107823753_F | chr13:107822042-107823753_F | lincRNA:chr13:107822042-107823753 forward strand                                                                                                           | -0.43                 | 0.033   | 0.487           |
| ENSMUST00000011324          | ENSMUST00000011324          | Unknown                                                                                                                                                    | -0.43                 | 0.040   | 0.502           |
| chrX:148720661-148763177_F  | chrX:148720661-148763177_F  | lincRNA:chrX:148720661-148763177 forward strand                                                                                                            | -0.43                 | 0.015   | 0.423           |
| Dll1                        | NM_007865                   | ref Mus musculus delta-like 1 (Drosophila) (Dll1), mRNA [NM_007865]                                                                                        | -0.43                 | 0.042   | 0.508           |
| F830034J09Rik               | AK156640                    | gb Mus musculus activated spleen cDNA, RIKEN full-length enriched library, clone:F830034J09 product:hypothetical protein, full insert sequence. [AK156640] | -0.43                 | 0.008   | 0.391           |
| ENSMUST00000063164          | ENSMUST00000063164          | ens RIKEN cDNA 2810021J22 gene Gene [Source:MGI Symbol;Acc:MGI:1917194] [ENSMUST00000063164]                                                               | -0.43                 | 0.015   | 0.421           |
| chr13:114514159-114514765_R | chr13:114514159-114514765_R | lincRNA:chr13:114514159-114514765 reverse strand                                                                                                           | -0.43                 | 0.027   | 0.472           |
| Aldh1a7                     | NM_011921                   | ref Mus musculus aldehyde dehydrogenase family 1, subfamily A7 (Aldh1a7), mRNA [NM_011921]                                                                 | -0.43                 | 0.018   | 0.435           |
| Olf58                       | NM_011001                   | ref Mus musculus olfactory receptor 58 (Olf58), mRNA [NM_011001]                                                                                           | -0.43                 | 0.010   | 0.403           |

Online Supplemental Table IV: mG4H-STZ Only

| Gene Symbol                | RefSeq                     | Description                                                                                                                                                                                       | logFC<br>mG4H-<br>STZ | P-value | Adj.<br>P-value |
|----------------------------|----------------------------|---------------------------------------------------------------------------------------------------------------------------------------------------------------------------------------------------|-----------------------|---------|-----------------|
| ENSMUST00000121829         | ENSMUST00000121829         | ens low density lipoprotein receptor-related protein 1 Gene [Source:MGI (curated);Acc:MGI:96828] [ENSMUST00000121829]                                                                             | -0.43                 | 0.045   | 0.513           |
| chr17:22420025-22457650_R  | chr17:22420025-22457650_R  | lincRNA:chr17:22420025-22457650 reverse strand                                                                                                                                                    | -0.43                 | 0.008   | 0.391           |
| Kif2a                      | NM_008442                  | ref Mus musculus kinesin family member 2A (Kif2a), transcript variant 1, mRNA [NM_008442]                                                                                                         | -0.43                 | 0.045   | 0.513           |
| chr13:90247709-90253992_F  | chr13:90247709-90253992_F  | lincRNA:chr13:90247709-90253992 forward strand                                                                                                                                                    | -0.43                 | 0.034   | 0.493           |
| 6720483E21Rik              | AK020171                   | gb Mus musculus 12 days embryo male wolffian duct includes surrounding region cDNA, RIKEN full-length enriched library, clone:6720483E21 product:unclassifiable, full insert sequence. [AK020171] | -0.43                 | 0.028   | 0.474           |
| Bbs10                      | NM_027914                  | ref Mus musculus Bardet-Biedl syndrome 10 (human) (Bbs10), mRNA [NM_027914]                                                                                                                       | -0.43                 | 0.029   | 0.477           |
| chr8:12535648-12544923_R   | chr8:12535648-12544923_R   | lincRNA:chr8:12535648-12544923 reverse strand                                                                                                                                                     | -0.43                 | 0.014   | 0.417           |
| 2410137M14Rik              | NM_029747                  | ref Mus musculus RIKEN cDNA 2410137M14 gene (2410137M14Rik), mRNA [NM_029747]                                                                                                                     | -0.43                 | 0.035   | 0.494           |
| Cdh8                       | NM_001039154               | ref Mus musculus cadherin 8 (Cdh8), transcript variant 1, mRNA [NM_001039154]                                                                                                                     | -0.43                 | 0.018   | 0.435           |
| chr5:105000678-105015290_F | chr5:105000678-105015290_F | lincRNA:chr5:105000678-105015290 forward strand                                                                                                                                                   | -0.43                 | 0.007   | 0.374           |
| ENSMUST00000009354         | ENSMUST00000009354         | ens RIKEN cDNA 2310007L24 gene Gene [Source:MGI Symbol;Acc:MGI:1922823] [ENSMUST00000009354]                                                                                                      | -0.43                 | 0.031   | 0.483           |
| Gm3916                     | XM_001478609               | ref PREDICTED: Mus musculus hypothetical protein LOC100042588 (LOC100042588), mRNA [XM_001478609]                                                                                                 | -0.43                 | 0.015   | 0.420           |
| chr18:5119300-5181600_R    | chr18:5119300-5181600_R    | lincRNA:chr18:5119300-5181600 reverse strand                                                                                                                                                      | -0.43                 | 0.035   | 0.495           |
| Adams19                    | NM_175506                  | ref Mus musculus a disintegrin-like and metalloprotease (reprolysin type) with thrombospondin type 1 motif, 19 (Adams19), mRNA [NM_175506]                                                        | -0.44                 | 0.024   | 0.459           |
| chr13:26791413-26810047_F  | chr13:26791413-26810047_F  | lincRNA:chr13:26791413-26810047 forward strand                                                                                                                                                    | -0.44                 | 0.026   | 0.471           |
| chr1:94077196-94077860_F   | chr1:94077196-94077860_F   | lincRNA:chr1:94077196-94077860 forward strand                                                                                                                                                     | -0.44                 | 0.025   | 0.465           |
| 9230115E21Rik              | NR_033560                  | ref Mus musculus RIKEN cDNA 9230115E21 gene (9230115E21Rik), non-coding RNA [NR_033560]                                                                                                           | -0.44                 | 0.006   | 0.356           |
| chr4:109071198-109078776_F | chr4:109071198-109078776_F | lincRNA:chr4:109071198-109078776 forward strand                                                                                                                                                   | -0.44                 | 0.040   | 0.502           |
| Ptx4                       | NM_026747                  | ref Mus musculus pentraxin 4 (Ptx4), transcript variant 1, mRNA [NM_026747]                                                                                                                       | -0.44                 | 0.034   | 0.491           |
| Sprr1b                     | NM_009265                  | ref Mus musculus small proline-rich protein 1B (Sprr1b), mRNA [NM_009265]                                                                                                                         | -0.44                 | 0.043   | 0.511           |
| LOC100046275               | ENSMUST00000103540         | ref PREDICTED: Mus musculus similar to Igba protein (LOC100046275), mRNA [XM_001475919]                                                                                                           | -0.44                 | 0.042   | 0.509           |
| chr15:96984422-97000322_F  | chr15:96984422-97000322_F  | lincRNA:chr15:96984422-97000322 forward strand                                                                                                                                                    | -0.44                 | 0.020   | 0.447           |
| ENSMUST000000092551        | ENSMUST000000092551        | ens low density lipoprotein receptor-related protein 2 Gene [Source:MGI (curated);Acc:MGI:95794] [ENSMUST000000092551]                                                                            | -0.44                 | 0.049   | 0.519           |
| Zfp873                     | NM_001024626               | ref Mus musculus zinc finger protein 873 (Zfp873), mRNA [NM_001024626]                                                                                                                            | -0.44                 | 0.018   | 0.437           |
| chr17:79042382-79052046_F  | chr17:79042382-79052046_F  | lincRNA:chr17:79042382-79052046 forward strand                                                                                                                                                    | -0.44                 | 0.035   | 0.495           |
| ENSMUST00000114885         | ENSMUST00000114885         | ens deltex 3-like (Drosophila) Gene [Source:MGI (curated);Acc:MGI:2656973] [ENSMUST00000114885]                                                                                                   | -0.44                 | 0.013   | 0.412           |
| chr15:77164450-77201325_F  | chr15:77164450-77201325_F  | lincRNA:chr15:77164450-77201325 forward strand                                                                                                                                                    | -0.44                 | 0.030   | 0.480           |
| chr9:9024733-9041933_F     | chr9:9024733-9041933_F     | lincRNA:chr9:9024733-9041933 forward strand                                                                                                                                                       | -0.44                 | 0.047   | 0.516           |

Online Supplemental Table IV: mG4H-STZ Only

| Gene Symbol                | RefSeq                     | Description                                                                                                                                                | logFC<br>mG4H-<br>STZ | P-value | Adj.<br>P-value |
|----------------------------|----------------------------|------------------------------------------------------------------------------------------------------------------------------------------------------------|-----------------------|---------|-----------------|
| 6530401N04Rik              | NM_029545                  | ref Mus musculus RIKEN cDNA 6530401N04 gene (6530401N04Rik), mRNA [NM_029545]                                                                              | -0.44                 | 0.029   | 0.477           |
| Iqck                       | NM_001081446               | ref Mus musculus IQ motif containing K (Iqck), mRNA [NM_001081446]                                                                                         | -0.44                 | 0.044   | 0.513           |
| Olf1167                    | NM_146294                  | ref Mus musculus olfactory receptor 1167 (Olf1167), mRNA [NM_146294]                                                                                       | -0.44                 | 0.022   | 0.452           |
| Dapp1                      | NM_011932                  | ref Mus musculus dual adaptor for phosphotyrosine and 3-phosphoinositides 1 (Dapp1), mRNA [NM_011932]                                                      | -0.44                 | 0.037   | 0.496           |
| Cd209g                     | ENSMUST00000111011         | ens CD209g antigen Gene [Source:MGI (curated);Acc:MGI:1917442] [ENSMUST00000111011]                                                                        | -0.44                 | 0.048   | 0.516           |
| Nup210l                    | NM_029937                  | ref Mus musculus nucleoporin 210-like (Nup210l), mRNA [NM_029937]                                                                                          | -0.44                 | 0.035   | 0.494           |
| chr5:75183748-75184179_R   | chr5:75183748-75184179_R   | lincRNA:chr5:75183748-75184179 reverse strand                                                                                                              | -0.44                 | 0.016   | 0.425           |
| chr11:63054652-63131714_R  | chr11:63054652-63131714_R  | lincRNA:chr11:63054652-63131714 reverse strand                                                                                                             | -0.44                 | 0.041   | 0.505           |
| 4930469K13Rik              | AK037310                   | gb Mus musculus 16 days neonate thymus cDNA, RIKEN full-length enriched library, clone:A130005E13 product:unclassifiable, full insert sequence. [AK037310] | -0.44                 | 0.035   | 0.495           |
| ENSMUST00000119870         | ENSMUST00000119870         | ens cyclic nucleotide gated channel beta 1 Gene [Source:MGI (curated);Acc:MGI:2664102] [ENSMUST00000119870]                                                | -0.44                 | 0.026   | 0.468           |
| Gcsh                       | NM_026572                  | ref Mus musculus glycine cleavage system protein H (aminomethyl carrier) (Gcsh), nuclear gene encoding mitochondrial protein, mRNA [NM_026572]             | -0.44                 | 0.012   | 0.407           |
| chr6:42659063-42660071_R   | chr6:42659063-42660071_R   | lincRNA:chr6:42659063-42660071 reverse strand                                                                                                              | -0.44                 | 0.012   | 0.412           |
| chr6:121035524-121061074_F | chr6:121035524-121061074_F | lincRNA:chr6:121035524-121061074 forward strand                                                                                                            | -0.44                 | 0.019   | 0.441           |
| 4930443O20Rik              | AK015373                   | gb Mus musculus adult male testis cDNA, RIKEN full-length enriched library, clone:4930443O20 product:unclassifiable, full insert sequence. [AK015373]      | -0.44                 | 0.029   | 0.477           |
| 4930465A12Rik              | XM_897643                  | ref PREDICTED: Mus musculus RIKEN cDNA 4930465A12 gene (4930465A12Rik), mRNA [XM_897643]                                                                   | -0.44                 | 0.049   | 0.519           |
| AI574175                   | AI574175                   | gb uj16h04.x1 Sugano mouse kidney mkia Mus musculus cDNA clone IMAGE:1908247 3'. [AI574175]                                                                | -0.45                 | 0.026   | 0.470           |
| Pira6                      | NM_011093                  | ref Mus musculus paired-Ig-like receptor A6 (Pira6), transcript variant 2, mRNA [NM_011093]                                                                | -0.45                 | 0.020   | 0.443           |
| LOC100048058               | XM_001479435               | ref PREDICTED: Mus musculus similar to Solute carrier family 29 (nucleoside transporters), member 4 (LOC100048058), mRNA [XM_001479435]                    | -0.45                 | 0.050   | 0.520           |
| chr11:16831925-16851121_F  | chr11:16831925-16851121_F  | lincRNA:chr11:16831925-16851121 forward strand                                                                                                             | -0.45                 | 0.034   | 0.493           |
| chr14:52874069-52877398_R  | chr14:52874069-52877398_R  | lincRNA:chr14:52874069-52877398 reverse strand                                                                                                             | -0.45                 | 0.008   | 0.389           |
| chr1:175705225-175717250_R | chr1:175705225-175717250_R | lincRNA:chr1:175705225-175717250 reverse strand                                                                                                            | -0.45                 | 0.024   | 0.461           |
| Tmpo                       | NM_001080134               | ref Mus musculus thymopoietin (Tmpo), transcript variant 6, mRNA [NM_001080134]                                                                            | -0.45                 | 0.039   | 0.499           |
| 1110028F11Rik              | BC096659                   | gb Mus musculus cDNA clone IMAGE:576750. [BC096659]                                                                                                        | -0.45                 | 0.025   | 0.467           |
| Aldh1l2                    | NM_153543                  | ref Mus musculus aldehyde dehydrogenase 1 family, member L2 (Aldh1l2), mRNA [NM_153543]                                                                    | -0.45                 | 0.005   | 0.349           |
| ENSMUST00000114941         | ENSMUST00000114941         | ens enoyl Coenzyme A hydratase domain containing 3 Gene [Source:MGI (curated);Acc:MGI:1915106] [ENSMUST00000114941]                                        | -0.45                 | 0.030   | 0.477           |
| Gm9693                     | XM_001480929               | ref PREDICTED: Mus musculus hypothetical LOC676882 (LOC676882), mRNA [XM_001480929]                                                                        | -0.45                 | 0.012   | 0.409           |
| Stag3                      | NM_016964                  | ref Mus musculus stromal antigen 3 (Stag3), mRNA [NM_016964]                                                                                               | -0.45                 | 0.038   | 0.499           |
| Rab19                      | NM_011226                  | ref Mus musculus RAB19, member RAS oncogene family (Rab19), mRNA [NM_011226]                                                                               | -0.45                 | 0.008   | 0.392           |

Online Supplemental Table IV: mG4H-STZ Only

| Gene Symbol                        | RefSeq                      | Description                                                                                                                                           | logFC<br>mG4H-<br>STZ | P-value | Adj.<br>P-value |
|------------------------------------|-----------------------------|-------------------------------------------------------------------------------------------------------------------------------------------------------|-----------------------|---------|-----------------|
| <b>Agk</b>                         | NM_023538                   | ref Mus musculus acylglycerol kinase (Agk), nuclear gene encoding mitochondrial protein, mRNA [NM_023538]                                             | -0.45                 | 0.034   | 0.493           |
| <b>chr4:21683562-21694344_R</b>    | chr4:21683562-21694344_R    | lincRNA:chr4:21683562-21694344 reverse strand                                                                                                         | -0.45                 | 0.011   | 0.406           |
| <b>chr12:103151449-103153545_F</b> | chr12:103151449-103153545_F | lincRNA:chr12:103151449-103153545 forward strand                                                                                                      | -0.45                 | 0.011   | 0.407           |
| <b>Mtnr1a</b>                      | NM_008639                   | ref Mus musculus melatonin receptor 1A (Mtnr1a), mRNA [NM_008639]                                                                                     | -0.45                 | 0.012   | 0.408           |
| <b>Dspp</b>                        | NM_010080                   | ref Mus musculus dentin sialophosphoprotein (Dspp), mRNA [NM_010080]                                                                                  | -0.45                 | 0.008   | 0.392           |
| <b>chr10:84005221-84022896_R</b>   | chr10:84005221-84022896_R   | lincRNA:chr10:84005221-84022896 reverse strand                                                                                                        | -0.45                 | 0.009   | 0.398           |
| <b>Pilrb2</b>                      | NM_001024932                | ref Mus musculus paired immunoglobulin-like type 2 receptor beta 2 (Pilrb2), mRNA [NM_001024932]                                                      | -0.45                 | 0.042   | 0.508           |
| <b>Olfir1512</b>                   | NM_146432                   | ref Mus musculus olfactory receptor 1512 (Olfir1512), mRNA [NM_146432]                                                                                | -0.45                 | 0.047   | 0.515           |
| <b>Cit</b>                         | NM_007708                   | ref Mus musculus citron (Cit), mRNA [NM_007708]                                                                                                       | -0.45                 | 0.019   | 0.439           |
| <b>ENSMUST00000050338</b>          | ENSMUST00000050338          | ens RIKEN cDNA 1110020C17 gene Gene [Source:MGI Symbol;Acc:MGI:1915834] [ENSMUST00000050338]                                                          | -0.45                 | 0.011   | 0.406           |
| <b>Gm1631</b>                      | NM_201366                   | ref Mus musculus predicted gene 1631 (Gm1631), mRNA [NM_201366]                                                                                       | -0.45                 | 0.029   | 0.477           |
| <b>Edn2</b>                        | NM_007902                   | ref Mus musculus endothelin 2 (Edn2), mRNA [NM_007902]                                                                                                | -0.45                 | 0.026   | 0.471           |
| <b>chr16:23992037-24001037_R</b>   | chr16:23992037-24001037_R   | lincRNA:chr16:23992037-24001037 reverse strand                                                                                                        | -0.45                 | 0.021   | 0.447           |
| <b>Gm5141</b>                      | XM_001472146                | ref PREDICTED: Mus musculus hypothetical protein LOC380850 (LOC380850), mRNA [XM_001472146]                                                           | -0.45                 | 0.022   | 0.452           |
| <b>Flrt1</b>                       | NM_201411                   | ref Mus musculus fibronectin leucine rich transmembrane protein 1 (Flrt1), mRNA [NM_201411]                                                           | -0.45                 | 0.017   | 0.429           |
| <b>Sytl4</b>                       | NM_013757                   | ref Mus musculus synaptotagmin-like 4 (Sytl4), mRNA [NM_013757]                                                                                       | -0.46                 | 0.024   | 0.459           |
| <b>Ntrk3</b>                       | NM_008746                   | ref Mus musculus neurotrophic tyrosine kinase, receptor, type 3 (Ntrk3), transcript variant 1, mRNA [NM_008746]                                       | -0.46                 | 0.018   | 0.435           |
| <b>Drd1a</b>                       | NM_010076                   | ref Mus musculus dopamine receptor D1A (Drd1a), mRNA [NM_010076]                                                                                      | -0.46                 | 0.030   | 0.477           |
| <b>chr4:114585803-114588898_F</b>  | chr4:114585803-114588898_F  | lincRNA:chr4:114585803-114588898 forward strand                                                                                                       | -0.46                 | 0.022   | 0.452           |
| <b>LOC100044506</b>                | XM_001472459                | ref PREDICTED: Mus musculus similar to HBxAg transactivated protein 2 (LOC100044506), mRNA [XM_001472459]                                             | -0.46                 | 0.004   | 0.325           |
| <b>Gm2060</b>                      | XR_030663                   | ref PREDICTED: Mus musculus similar to Ac2-210 (LOC100039137), misc RNA [XR_030663]                                                                   | -0.46                 | 0.034   | 0.493           |
| <b>chr13:95613081-95640256_F</b>   | chr13:95613081-95640256_F   | lincRNA:chr13:95613081-95640256 forward strand                                                                                                        | -0.46                 | 0.006   | 0.369           |
| <b>ENSMUST00000084357</b>          | ENSMUST00000084357          | ens Putative uncharacterized protein Fragment [Source:UniProtKB/TrEMBL;Acc:Q8CBJ2] [ENSMUST00000084357]                                               | -0.46                 | 0.029   | 0.477           |
| <b>1700051A21Rik</b>               | AK077134                    | gb Mus musculus adult male testis cDNA, RIKEN full-length enriched library, clone:4933411B07 product:unclassifiable, full insert sequence. [AK077134] | -0.46                 | 0.037   | 0.497           |
| <b>Muc4</b>                        | NM_080457                   | ref Mus musculus mucin 4 (Muc4), mRNA [NM_080457]                                                                                                     | -0.46                 | 0.050   | 0.520           |
| <b>Lrrc8e</b>                      | NM_028175                   | ref Mus musculus leucine rich repeat containing 8 family, member E (Lrrc8e), mRNA [NM_028175]                                                         | -0.46                 | 0.038   | 0.499           |
| <b>Wscd1</b>                       | NM_177618                   | ref Mus musculus WSC domain containing 1 (Wscd1), mRNA [NM_177618]                                                                                    | -0.46                 | 0.026   | 0.471           |
| <b>Stox1</b>                       | NM_001033260                | ref Mus musculus storkhead box 1 (Stox1), mRNA [NM_001033260]                                                                                         | -0.46                 | 0.022   | 0.452           |
| <b>LOC100047284</b>                | XM_001477797                | ref PREDICTED: Mus musculus similar to CDNA sequence BC060632 (LOC100047284), mRNA [XM_001477797]                                                     | -0.46                 | 0.049   | 0.519           |



Online Supplemental Table IV: mG4H-STZ Only

| Gene Symbol                | RefSeq                     | Description                                                                                                           | logFC<br>mG4H-<br>STZ | P-value | Adj.<br>P-value |
|----------------------------|----------------------------|-----------------------------------------------------------------------------------------------------------------------|-----------------------|---------|-----------------|
| Gm15847                    | XR_001979                  | ref PREDICTED: Mus musculus similar to zygote arrest 1 (LOC667127), misc RNA [XR_001979]                              | -0.46                 | 0.003   | 0.281           |
| chr17:71242333-71273533_R  | chr17:71242333-71273533_R  | lincRNA:chr17:71242333-71273533 reverse strand                                                                        | -0.46                 | 0.022   | 0.453           |
| Slc44a5                    | NM_001081263               | ref Mus musculus solute carrier family 44, member 5 (Slc44a5), mRNA [NM_001081263]                                    | -0.46                 | 0.042   | 0.507           |
| A_55_P2077473              | A_55_P2077473              | Unknown                                                                                                               | -0.46                 | 0.024   | 0.459           |
| Sh3bgrl2                   | NM_172507                  | ref Mus musculus SH3 domain binding glutamic acid-rich protein like 2 (Sh3bgrl2), mRNA [NM_172507]                    | -0.46                 | 0.025   | 0.464           |
| ENSMUST00000081193         | ENSMUST00000081193         | ens RIKEN cDNA 5730460C07 gene Gene [Source:MGI Symbol;Acc:MGI:1917844] [ENSMUST00000081193]                          | -0.46                 | 0.035   | 0.495           |
| Gm13688                    | XR_032728                  | ref PREDICTED: Mus musculus similar to ribosomal protein L15 (LOC624223), misc RNA [XR_032728]                        | -0.46                 | 0.021   | 0.449           |
| Gnpda1                     | NM_011937                  | ref Mus musculus glucosamine-6-phosphate deaminase 1 (Gnpda1), mRNA [NM_011937]                                       | -0.46                 | 0.036   | 0.495           |
| chr15:85412264-85549139_R  | chr15:85412264-85549139_R  | lincRNA:chr15:85412264-85549139 reverse strand                                                                        | -0.46                 | 0.003   | 0.283           |
| chr2:83540813-83541273_R   | chr2:83540813-83541273_R   | lincRNA:chr2:83540813-83541273 reverse strand                                                                         | -0.46                 | 0.046   | 0.513           |
| chr17:13185488-13187031_R  | chr17:13185488-13187031_R  | lincRNA:chr17:13185488-13187031 reverse strand                                                                        | -0.46                 | 0.003   | 0.281           |
| chr3:125563727-125564266_F | chr3:125563727-125564266_F | lincRNA:chr3:125563727-125564266 forward strand                                                                       | -0.46                 | 0.027   | 0.472           |
| 1700010L04Rik              | XM_884181                  | ref PREDICTED: Mus musculus hypothetical LOC619808 (LOC619808), mRNA [XM_884181]                                      | -0.46                 | 0.019   | 0.438           |
| LOC639496                  | XM_915944                  | ref PREDICTED: Mus musculus similar to Novel synovial sarcoma, X member B family member (LOC639496), mRNA [XM_915944] | -0.47                 | 0.026   | 0.468           |
| chr13:98062189-98066613_F  | chr13:98062189-98066613_F  | lincRNA:chr13:98062189-98066613 forward strand                                                                        | -0.47                 | 0.008   | 0.392           |
| B9d1                       | NM_013717                  | ref Mus musculus B9 protein domain 1 (B9d1), mRNA [NM_013717]                                                         | -0.47                 | 0.029   | 0.477           |
| Gm2680                     | XM_001474691               | ref PREDICTED: Mus musculus hypothetical protein LOC100040258 (LOC100040258), mRNA [XM_001474691]                     | -0.47                 | 0.017   | 0.429           |
| Fmn1                       | NM_001077698               | ref Mus musculus formin-like 1 (Fmn1), transcript variant 2, mRNA [NM_001077698]                                      | -0.47                 | 0.020   | 0.441           |
| Slc24a5                    | NM_175034                  | ref Mus musculus solute carrier family 24, member 5 (Slc24a5), mRNA [NM_175034]                                       | -0.47                 | 0.040   | 0.504           |
| Olf1263                    | NM_146794                  | ref Mus musculus olfactory receptor 1263 (Olf1263), mRNA [NM_146794]                                                  | -0.47                 | 0.014   | 0.418           |
| Olf178                     | NM_130866                  | ref Mus musculus olfactory receptor 78 (Olf178), transcript variant 1, mRNA [NM_130866]                               | -0.47                 | 0.032   | 0.485           |
| Tmem18                     | NM_172049                  | ref Mus musculus transmembrane protein 18 (Tmem18), mRNA [NM_172049]                                                  | -0.47                 | 0.038   | 0.499           |
| Kcnh6                      | NM_001037712               | ref Mus musculus potassium voltage-gated channel, subfamily H (eag-related), member 6 (Kcnh6), mRNA [NM_001037712]    | -0.47                 | 0.018   | 0.435           |
| Tpk1                       | NM_013861                  | ref Mus musculus thiamine pyrophosphokinase (Tpk1), mRNA [NM_013861]                                                  | -0.47                 | 0.033   | 0.490           |
| Zim1                       | NM_011769                  | ref Mus musculus zinc finger, imprinted 1 (Zim1), mRNA [NM_011769]                                                    | -0.47                 | 0.040   | 0.501           |
| 5033406O09Rik              | NR_029464                  | ref Mus musculus RIKEN cDNA 5033406O09 gene (5033406O09Rik), non-coding RNA [NR_029464]                               | -0.47                 | 0.046   | 0.513           |
| Gm5427                     | XM_990631                  | ref PREDICTED: Mus musculus predicted gene, EG432494 (EG432494), mRNA [XM_990631]                                     | -0.47                 | 0.042   | 0.509           |
| ENSMUST00000096145         | ENSMUST00000096145         | ens Protein kinase Fragment [Source:UniProtKB/TrEMBL;Acc:Q60647] [ENSMUST00000096145]                                 | -0.47                 | 0.016   | 0.426           |
| chr11:97505439-97522274_R  | chr11:97505439-97522274_R  | lincRNA:chr11:97505439-97522274 reverse strand                                                                        | -0.47                 | 0.011   | 0.407           |



Online Supplemental Table IV: mG4H-STZ Only

| Gene Symbol                 | RefSeq                      | Description                                                                                                       | logFC<br>mG4H-<br>STZ | P-value | Adj.<br>P-value |
|-----------------------------|-----------------------------|-------------------------------------------------------------------------------------------------------------------|-----------------------|---------|-----------------|
| chr6:42659063-42660071_R    | chr6:42659063-42660071_R    | lincRNA:chr6:42659063-42660071 reverse strand                                                                     | -0.47                 | 0.041   | 0.506           |
| A_55_P2395732               | A_55_P2395732               | Unknown                                                                                                           | -0.47                 | 0.033   | 0.487           |
| chr11:120041124-120052299_F | chr11:120041124-120052299_F | lincRNA:chr11:120041124-120052299 forward strand                                                                  | -0.47                 | 0.034   | 0.491           |
| ENSMUST00000091253          | ENSMUST00000091253          | ens importin 11 Gene [Source:MGI Symbol;Acc:MGI:2442377] [ENSMUST00000091253]                                     | -0.47                 | 0.006   | 0.369           |
| chr3:121615836-121616109_F  | chr3:121615836-121616109_F  | lincRNA:chr3:121615836-121616109 forward strand                                                                   | -0.47                 | 0.014   | 0.412           |
| Slc22a14                    | NM_001037749                | ref Mus musculus solute carrier family 22 (organic cation transporter), member 14 (Slc22a14), mRNA [NM_001037749] | -0.47                 | 0.024   | 0.459           |
| Ing2                        | NM_023503                   | ref Mus musculus inhibitor of growth family, member 2 (Ing2), mRNA [NM_023503]                                    | -0.47                 | 0.007   | 0.377           |
| ENSMUST00000099240          | ENSMUST00000099240          | ens Putative uncharacterized protein [Source:UniProtKB/TrEMBL;Acc:Q3ULU2] [ENSMUST00000099240]                    | -0.47                 | 0.005   | 0.340           |
| chr6:145647711-145756861_R  | chr6:145647711-145756861_R  | lincRNA:chr6:145647711-145756861 reverse strand                                                                   | -0.47                 | 0.023   | 0.456           |
| Cdca7l                      | NM_146040                   | ref Mus musculus cell division cycle associated 7 like (Cdca7l), mRNA [NM_146040]                                 | -0.47                 | 0.012   | 0.408           |
| chr14:65874977-65880202_R   | chr14:65874977-65880202_R   | lincRNA:chr14:65874977-65880202 reverse strand                                                                    | -0.47                 | 0.011   | 0.407           |
| ENSMUST00000067993          | ENSMUST00000067993          | ens RIKEN cDNA 4930566N20 gene Gene [Source:MGI Symbol;Acc:MGI:1923174] [ENSMUST00000067993]                      | -0.47                 | 0.030   | 0.477           |
| Arhgap15                    | NM_153820                   | ref Mus musculus Rho GTPase activating protein 15 (Arhgap15), transcript variant 1, mRNA [NM_153820]              | -0.47                 | 0.008   | 0.390           |
| chr18:35976163-35976530_F   | chr18:35976163-35976530_F   | lincRNA:chr18:35976163-35976530 forward strand                                                                    | -0.48                 | 0.042   | 0.507           |
| Tmc5                        | NM_001105252                | ref Mus musculus transmembrane channel-like gene family 5 (Tmc5), transcript variant 1, mRNA [NM_001105252]       | -0.48                 | 0.003   | 0.308           |
| 1700011H22Rik               | NM_027034                   | ref Mus musculus RIKEN cDNA 1700011H22 gene (1700011H22Rik), mRNA [NM_027034]                                     | -0.48                 | 0.041   | 0.504           |
| chr4:55593675-55629225_F    | chr4:55593675-55629225_F    | lincRNA:chr4:55593675-55629225 forward strand                                                                     | -0.48                 | 0.009   | 0.393           |
| ENSMUST00000086982          | ENSMUST00000086982          | ens RIKEN cDNA 4933407118 gene Gene [Source:MGI Symbol;Acc:MGI:1918371] [ENSMUST00000086982]                      | -0.48                 | 0.040   | 0.504           |
| Dhcr24                      | NM_053272                   | ref Mus musculus 24-dehydrocholesterol reductase (Dhcr24), mRNA [NM_053272]                                       | -0.48                 | 0.021   | 0.448           |
| Fam55c                      | NM_001134457                | ref Mus musculus family with sequence similarity 55, member C (Fam55c), mRNA [NM_001134457]                       | -0.48                 | 0.011   | 0.407           |
| 1700027L20Rik               | ENSMUST00000044533          | ens RIKEN cDNA 1700027L20 gene Gene [Source:MGI Symbol;Acc:MGI:1916703] [ENSMUST00000044533]                      | -0.48                 | 0.025   | 0.467           |
| chr10:81165750-81236400_F   | chr10:81165750-81236400_F   | lincRNA:chr10:81165750-81236400 forward strand                                                                    | -0.48                 | 0.049   | 0.519           |
| Sfrs17b                     | NM_001081956                | ref Mus musculus splicing factor, arginine/serine-rich 17b (Sfrs17b), mRNA [NM_001081956]                         | -0.48                 | 0.036   | 0.495           |
| ENSMUST00000064349          | ENSMUST00000064349          | ens RIKEN cDNA A330008L17 gene Gene [Source:MGI Symbol;Acc:MGI:2443215] [ENSMUST00000064349]                      | -0.48                 | 0.042   | 0.508           |
| chr1:44922628-44923224_F    | chr1:44922628-44923224_F    | lincRNA:chr1:44922628-44923224 forward strand                                                                     | -0.48                 | 0.005   | 0.352           |
| LOC100039819                | XM_001473595                | ref PREDICTED: Mus musculus hypothetical protein LOC100039819 (LOC100039819), mRNA [XM_001473595]                 | -0.48                 | 0.023   | 0.454           |
| Gm3106                      | XM_001476136                | ref PREDICTED: Mus musculus similar to C87414 protein, transcript variant 2 (LOC100041032), mRNA [XM_001476136]   | -0.48                 | 0.038   | 0.499           |

Online Supplemental Table IV: mG4H-STZ Only

| Gene Symbol                | RefSeq                     | Description                                                                                                                                                  | logFC<br>mG4H-<br>STZ | P-value | Adj.<br>P-value |
|----------------------------|----------------------------|--------------------------------------------------------------------------------------------------------------------------------------------------------------|-----------------------|---------|-----------------|
| Ap3m2                      | NM_029505                  | ref Mus musculus adaptor-related protein complex 3, mu 2 subunit (Ap3m2), transcript variant 2, mRNA [NM_029505]                                             | -0.48                 | 0.031   | 0.482           |
| A_55_P2010557              | A_55_P2010557              | Unknown                                                                                                                                                      | -0.48                 | 0.020   | 0.443           |
| Cstf2                      | NM_133196                  | ref Mus musculus cleavage stimulation factor, 3' pre-RNA subunit 2 (Cstf2), mRNA [NM_133196]                                                                 | -0.48                 | 0.028   | 0.474           |
| chr2:174088550-174109425_F | chr2:174088550-174109425_F | lincRNA:chr2:174088550-174109425 forward strand                                                                                                              | -0.48                 | 0.036   | 0.495           |
| 4930478M13Rik              | XM_001478995               | ref PREDICTED: Mus musculus RIKEN cDNA 4930478M13 gene (4930478M13Rik), mRNA [XM_001478995]                                                                  | -0.48                 | 0.029   | 0.477           |
| Olfr183                    | NM_146485                  | ref Mus musculus olfactory receptor 183 (Olfr183), mRNA [NM_146485]                                                                                          | -0.48                 | 0.023   | 0.457           |
| LOC100047804               | XM_001478897               | ref PREDICTED: Mus musculus similar to ATP-binding cassette (ABC) transporter ABCA14 (LOC100047804), mRNA [XM_001478897]                                     | -0.48                 | 0.006   | 0.369           |
| chr17:3198868-3394643_R    | chr17:3198868-3394643_R    | lincRNA:chr17:3198868-3394643 reverse strand                                                                                                                 | -0.48                 | 0.020   | 0.447           |
| chr6:100162756-100178531_R | chr6:100162756-100178531_R | lincRNA:chr6:100162756-100178531 reverse strand                                                                                                              | -0.48                 | 0.024   | 0.459           |
| Gckr                       | NM_144909                  | ref Mus musculus glucokinase regulatory protein (Gckr), mRNA [NM_144909]                                                                                     | -0.48                 | 0.010   | 0.401           |
| Gm7131                     | XM_001477638               | ref PREDICTED: Mus musculus hypothetical LOC634201 (LOC634201), mRNA [XM_001477638]                                                                          | -0.48                 | 0.022   | 0.452           |
| Pycard                     | NM_023258                  | ref Mus musculus PYD and CARD domain containing (Pycard), mRNA [NM_023258]                                                                                   | -0.48                 | 0.031   | 0.482           |
| D730005E14Rik              | NR_030675                  | ref Mus musculus RIKEN cDNA D730005E14 gene (D730005E14Rik), non-coding RNA [NR_030675]                                                                      | -0.48                 | 0.031   | 0.480           |
| ENSMUST00000119425         | ENSMUST00000119425         | ens FK506 binding protein 8 Gene [Source:MGI (curated);Acc:MGI:1341070] [ENSMUST00000119425]                                                                 | -0.48                 | 0.021   | 0.449           |
| ENSMUST00000075385         | ENSMUST00000075385         | ens submaxillary gland androgen regulated protein 2 Gene [Source:MGI Symbol;Acc:MGI:102762] [ENSMUST00000075385]                                             | -0.49                 | 0.018   | 0.437           |
| LOC100045952               | XM_001475454               | ref PREDICTED: Mus musculus hypothetical protein LOC100045952 (LOC100045952), mRNA [XM_001475454]                                                            | -0.49                 | 0.013   | 0.412           |
| Mmp20                      | NM_013903                  | ref Mus musculus matrix metalloproteinase 20 (enamelysin) (Mmp20), mRNA [NM_013903]                                                                          | -0.49                 | 0.046   | 0.513           |
| Ccdc67                     | NM_181816                  | ref Mus musculus coiled-coil domain containing 67 (Ccdc67), mRNA [NM_181816]                                                                                 | -0.49                 | 0.043   | 0.510           |
| Ptplad2                    | NM_025760                  | ref Mus musculus protein tyrosine phosphatase-like A domain containing 2 (Ptplad2), mRNA [NM_025760]                                                         | -0.49                 | 0.014   | 0.418           |
| C230034O21Rik              | AK082297                   | gb Mus musculus 0 day neonate cerebellum cDNA, RIKEN full-length enriched library, clone:C230034O21 product:unclassifiable, full insert sequence. [AK082297] | -0.49                 | 0.013   | 0.412           |
| chrX:7560535-7560896_R     | chrX:7560535-7560896_R     | lincRNA:chrX:7560535-7560896 reverse strand                                                                                                                  | -0.49                 | 0.049   | 0.519           |
| Gprin3                     | NM_183183                  | ref Mus musculus GPRIN family member 3 (Gprin3), mRNA [NM_183183]                                                                                            | -0.49                 | 0.006   | 0.369           |
| Gm10191                    | XM_001478288               | ref PREDICTED: Mus musculus similar to ribosomal protein L31 (LOC100047426), mRNA [XM_001478288]                                                             | -0.49                 | 0.017   | 0.433           |
| chr15:5969454-5994540_R    | chr15:5969454-5994540_R    | lincRNA:chr15:5969454-5994540 reverse strand                                                                                                                 | -0.49                 | 0.047   | 0.514           |
| Ccnj                       | NM_172839                  | ref Mus musculus cyclin J (Ccnj), mRNA [NM_172839]                                                                                                           | -0.49                 | 0.034   | 0.493           |
| Zfp799                     | NM_177359                  | ref Mus musculus zinc finger protein 799 (Zfp799), mRNA [NM_177359]                                                                                          | -0.49                 | 0.027   | 0.471           |
| chr5:109156118-109156422_F | chr5:109156118-109156422_F | lincRNA:chr5:109156118-109156422 forward strand                                                                                                              | -0.49                 | 0.031   | 0.482           |
| Osbpl7                     | NM_001081434               | ref Mus musculus oxysterol binding protein-like 7 (Osbpl7), mRNA [NM_001081434]                                                                              | -0.49                 | 0.035   | 0.494           |

Online Supplemental Table IV: mG4H-STZ Only

| Gene Symbol                | RefSeq                     | Description                                                                                                                                                              | logFC<br>mG4H-<br>STZ | P-value | Adj.<br>P-value |
|----------------------------|----------------------------|--------------------------------------------------------------------------------------------------------------------------------------------------------------------------|-----------------------|---------|-----------------|
| 2700086A05Rik              | AK053996                   | gb Mus musculus 2 days pregnant adult female oviduct cDNA, RIKEN full-length enriched library, clone:E230011F24 product:unclassifiable, full insert sequence. [AK053996] | -0.49                 | 0.012   | 0.408           |
| Olf926                     | NM_146815                  | ref Mus musculus olfactory receptor 926 (Olf926), mRNA [NM_146815]                                                                                                       | -0.49                 | 0.016   | 0.428           |
| A1846148                   | NM_001033139               | ref Mus musculus expressed sequence A1846148 (A1846148), transcript variant 1, mRNA [NM_001033139]                                                                       | -0.49                 | 0.026   | 0.467           |
| D730040F13Rik              | ENSMUST00000107609         | ens RIKEN cDNA D730040F13 gene Gene [Source:MGI Symbol;Acc:MGI:2445107] [ENSMUST00000107609]                                                                             | -0.49                 | 0.044   | 0.513           |
| chr4:123155515-123361565_F | chr4:123155515-123361565_F | lincRNA:chr4:123155515-123361565 forward strand                                                                                                                          | -0.49                 | 0.012   | 0.410           |
| 1500012K07Rik              | XM_001478389               | ref PREDICTED: Mus musculus RIKEN cDNA 1500012K07 gene (1500012K07Rik), mRNA [XM_001478389]                                                                              | -0.49                 | 0.045   | 0.513           |
| Gm15550                    | XR_032342                  | ref PREDICTED: Mus musculus similar to 5-aminoimidazole-4-carboxamide ribonucleotide formyltransferase/IMP cyclohydrolase (LOC665747), misc RNA [XR_032342]              | -0.49                 | 0.026   | 0.468           |
| Rnase11                    | NM_001011877               | ref Mus musculus ribonuclease, RNase A family, 11 (non-active) (Rnase11), mRNA [NM_001011877]                                                                            | -0.49                 | 0.034   | 0.493           |
| chr7:6296401-6311486_F     | chr7:6296401-6311486_F     | lincRNA:chr7:6296401-6311486 forward strand                                                                                                                              | -0.49                 | 0.020   | 0.443           |
| ENSMUST00000121091         | ENSMUST00000121091         | ens sacsin Gene [Source:MGI (curated);Acc:MGI:1354724] [ENSMUST00000121091]                                                                                              | -0.49                 | 0.008   | 0.391           |
| Gm9271                     | XM_001004349               | ref PREDICTED: Mus musculus predicted gene, EG668618, transcript variant 2 (EG668618), mRNA [XM_001004349]                                                               | -0.49                 | 0.030   | 0.477           |
| Reg1                       | NM_009042                  | ref Mus musculus regenerating islet-derived 1 (Reg1), mRNA [NM_009042]                                                                                                   | -0.49                 | 0.008   | 0.389           |
| chr1:135956616-135957485_R | chr1:135956616-135957485_R | lincRNA:chr1:135956616-135957485 reverse strand                                                                                                                          | -0.49                 | 0.037   | 0.496           |
| chr8:105742425-105852975_R | chr8:105742425-105852975_R | lincRNA:chr8:105742425-105852975 reverse strand                                                                                                                          | -0.50                 | 0.006   | 0.366           |
| chr4:8574809-8575224_R     | chr4:8574809-8575224_R     | lincRNA:chr4:8574809-8575224 reverse strand                                                                                                                              | -0.50                 | 0.046   | 0.513           |
| chr13:74642700-74701900_R  | chr13:74642700-74701900_R  | lincRNA:chr13:74642700-74701900 reverse strand                                                                                                                           | -0.50                 | 0.018   | 0.435           |
| chr1:155219662-155231912_F | chr1:155219662-155231912_F | lincRNA:chr1:155219662-155231912 forward strand                                                                                                                          | -0.50                 | 0.016   | 0.426           |
| chr15:6915910-6915980_R    | chr15:6915910-6915980_R    | lincRNA:chr15:6915910-6915980 reverse strand                                                                                                                             | -0.50                 | 0.044   | 0.512           |
| Olf641                     | NM_147072                  | ref Mus musculus olfactory receptor 641 (Olf641), mRNA [NM_147072]                                                                                                       | -0.50                 | 0.011   | 0.407           |
| Thy1                       | NM_009382                  | ref Mus musculus thymus cell antigen 1, theta (Thy1), mRNA [NM_009382]                                                                                                   | -0.50                 | 0.025   | 0.463           |
| Olf1215                    | NM_146459                  | ref Mus musculus olfactory receptor 1215 (Olf1215), mRNA [NM_146459]                                                                                                     | -0.50                 | 0.043   | 0.509           |
| Mfsd9                      | NM_172499                  | ref Mus musculus major facilitator superfamily domain containing 9 (Mfsd9), mRNA [NM_172499]                                                                             | -0.50                 | 0.021   | 0.448           |
| chr1:58443698-58449898_R   | chr1:58443698-58449898_R   | lincRNA:chr1:58443698-58449898 reverse strand                                                                                                                            | -0.50                 | 0.000   | 0.160           |
| Lonrf2                     | NM_001029878               | ref Mus musculus LON peptidase N-terminal domain and ring finger 2 (Lonrf2), mRNA [NM_001029878]                                                                         | -0.50                 | 0.044   | 0.511           |
| Gm3310                     | XM_001477528               | ref PREDICTED: Mus musculus hypothetical protein LOC100041390 (LOC100041390), mRNA [XM_001477528]                                                                        | -0.50                 | 0.047   | 0.515           |
| Exoc3l                     | NM_177788                  | ref Mus musculus exocyst complex component 3-like (Exoc3l), mRNA [NM_177788]                                                                                             | -0.50                 | 0.016   | 0.426           |
| Olf1357                    | NM_001011737               | ref Mus musculus olfactory receptor 1357 (Olf1357), mRNA [NM_001011737]                                                                                                  | -0.50                 | 0.007   | 0.382           |
| Sh3bgrl2                   | NM_172507                  | ref Mus musculus SH3 domain binding glutamic acid-rich protein like 2 (Sh3bgrl2), mRNA [NM_172507]                                                                       | -0.50                 | 0.032   | 0.484           |

Online Supplemental Table IV: mG4H-STZ Only

| Gene Symbol                       | RefSeq                     | Description                                                                                                                                           | logFC<br>mG4H-<br>STZ | P-value | Adj.<br>P-value |
|-----------------------------------|----------------------------|-------------------------------------------------------------------------------------------------------------------------------------------------------|-----------------------|---------|-----------------|
| <b>ENSMUST00000101355</b>         | ENSMUST00000101355         | ens predicted gene 5570 Gene [Source:MGI Symbol;Acc:MGI:3644382] [ENSMUST00000101355]                                                                 | -0.50                 | 0.033   | 0.490           |
| <b>AU019176</b>                   | BM228091                   | gb K0255B03-3 NIA Mouse Unfertilized Egg cDNA Library (Long) Mus musculus cDNA clone NIA:K0255B03 IMAGE:30049934 3', mRNA sequence [BM228091]         | -0.50                 | 0.001   | 0.227           |
| <b>Tube1</b>                      | NM_028006                  | ref Mus musculus epsilon-tubulin 1 (Tube1), mRNA [NM_028006]                                                                                          | -0.50                 | 0.021   | 0.448           |
| <b>Prss44</b>                     | NM_148940                  | ref Mus musculus protease, serine, 44 (Prss44), mRNA [NM_148940]                                                                                      | -0.50                 | 0.017   | 0.429           |
| <b>Ddx11</b>                      | NM_001003919               | ref Mus musculus DEAD/H (Asp-Glu-Ala-Asp/His) box polypeptide 11 (CHL1-like helicase homolog, S. cerevisiae) (Ddx11), mRNA [NM_001003919]             | -0.50                 | 0.046   | 0.513           |
| <b>LOC100045156</b>               | XM_001473861               | ref PREDICTED: Mus musculus hypothetical protein LOC100045156 (LOC100045156), mRNA [XM_001473861]                                                     | -0.50                 | 0.037   | 0.496           |
| <b>chr15:61919018-61935580_F</b>  | chr15:61919018-61935580_F  | lincRNA:chr15:61919018-61935580 forward strand                                                                                                        | -0.50                 | 0.005   | 0.355           |
| <b>chr2:116796887-116797441_F</b> | chr2:116796887-116797441_F | lincRNA:chr2:116796887-116797441 forward strand                                                                                                       | -0.50                 | 0.038   | 0.499           |
| <b>chr18:36449530-36456800_R</b>  | chr18:36449530-36456800_R  | lincRNA:chr18:36449530-36456800 reverse strand                                                                                                        | -0.50                 | 0.041   | 0.506           |
| <b>chr11:5377054-5377725_R</b>    | chr11:5377054-5377725_R    | lincRNA:chr11:5377054-5377725 reverse strand                                                                                                          | -0.50                 | 0.019   | 0.437           |
| <b>Zfp353</b>                     | NM_153096                  | ref Mus musculus zinc finger protein 353 (Zfp353), mRNA [NM_153096]                                                                                   | -0.50                 | 0.017   | 0.435           |
| <b>Sycp2</b>                      | NM_177191                  | ref Mus musculus synaptonemal complex protein 2 (Sycp2), mRNA [NM_177191]                                                                             | -0.50                 | 0.015   | 0.419           |
| <b>Mtif3</b>                      | NM_029581                  | ref Mus musculus mitochondrial translational initiation factor 3 (Mtif3), nuclear gene encoding mitochondrial protein, mRNA [NM_029581]               | -0.50                 | 0.044   | 0.512           |
| <b>LOC100047012</b>               | XM_001477380               | ref PREDICTED: Mus musculus similar to ubiquitin-conjugating enzyme UbcM2 (LOC100047012), mRNA [XM_001477380]                                         | -0.50                 | 0.015   | 0.421           |
| <b>2900062L11Rik</b>              | NM_029823                  | ref Mus musculus RIKEN cDNA 2900062L11 gene (2900062L11Rik), mRNA [NM_029823]                                                                         | -0.51                 | 0.012   | 0.409           |
| <b>Mrpl19</b>                     | NM_026490                  | ref Mus musculus mitochondrial ribosomal protein L19 (Mrpl19), nuclear gene encoding mitochondrial protein, mRNA [NM_026490]                          | -0.51                 | 0.017   | 0.429           |
| <b>4930556C24Rik</b>              | BY715748                   | gb BY715748 RIKEN full-length enriched, adult male testis Mus musculus cDNA clone 4930556C24 5'. [BY715748]                                           | -0.51                 | 0.013   | 0.412           |
| <b>chr6:30983012-31009987_F</b>   | chr6:30983012-31009987_F   | lincRNA:chr6:30983012-31009987 forward strand                                                                                                         | -0.51                 | 0.020   | 0.441           |
| <b>4930533K18Rik</b>              | AK017042                   | gb Mus musculus adult male testis cDNA, RIKEN full-length enriched library, clone:4933433H14 product:unclassifiable, full insert sequence. [AK017042] | -0.51                 | 0.035   | 0.494           |
| <b>LOC100047261</b>               | XR_033381                  | ref PREDICTED: Mus musculus similar to spermidine/spermine N1-acetyltransferase (LOC100047261), misc RNA [XR_033381]                                  | -0.51                 | 0.039   | 0.501           |
| <b>Ets1</b>                       | NM_011808                  | ref Mus musculus E26 avian leukemia oncogene 1, 5' domain (Ets1), transcript variant 1, mRNA [NM_011808]                                              | -0.51                 | 0.031   | 0.480           |
| <b>9530077C05Rik</b>              | NM_026739                  | ref Mus musculus RIKEN cDNA 9530077C05 gene (9530077C05Rik), mRNA [NM_026739]                                                                         | -0.51                 | 0.019   | 0.437           |
| <b>chr13:28066579-28067179_F</b>  | chr13:28066579-28067179_F  | lincRNA:chr13:28066579-28067179 forward strand                                                                                                        | -0.51                 | 0.038   | 0.499           |
| <b>Gm3575</b>                     | XM_001475331               | ref PREDICTED: Mus musculus hypothetical protein LOC100046001 (LOC100046001), mRNA [XM_001475331]                                                     | -0.51                 | 0.029   | 0.477           |
| <b>Lmo3</b>                       | NM_207222                  | ref Mus musculus LIM domain only 3 (Lmo3), mRNA [NM_207222]                                                                                           | -0.51                 | 0.032   | 0.485           |
| <b>chr2:150072436-150074859_F</b> | chr2:150072436-150074859_F | lincRNA:chr2:150072436-150074859 forward strand                                                                                                       | -0.51                 | 0.015   | 0.420           |

Online Supplemental Table IV: mG4H-STZ Only

| Gene Symbol                 | RefSeq                      | Description                                                                                                     | logFC<br>mG4H-<br>STZ | P-value | Adj.<br>P-value |
|-----------------------------|-----------------------------|-----------------------------------------------------------------------------------------------------------------|-----------------------|---------|-----------------|
| chr2:79521628-79521871_F    | chr2:79521628-79521871_F    | lincRNA:chr2:79521628-79521871 forward strand                                                                   | -0.51                 | 0.030   | 0.477           |
| chr5:22056218-22206995_F    | chr5:22056218-22206995_F    | lincRNA:chr5:22056218-22206995 forward strand                                                                   | -0.51                 | 0.007   | 0.377           |
| Vpreb1                      | NM_016982                   | ref Mus musculus pre-B lymphocyte gene 1 (Vpreb1), mRNA [NM_016982]                                             | -0.51                 | 0.037   | 0.497           |
| ENSMUST00000056994          | ENSMUST00000056994          | ens RIKEN cDNA 4921513I03 gene Gene [Source:MGI Symbol;Acc:MGI:1918124] [ENSMUST00000056994]                    | -0.51                 | 0.031   | 0.482           |
| Olfir888                    | NM_146424                   | ref Mus musculus olfactory receptor 888 (Olfir888), mRNA [NM_146424]                                            | -0.51                 | 0.006   | 0.361           |
| ENSMUST00000115135          | ENSMUST00000115135          | ens Putative uncharacterized protein [Source:UniProtKB/TrEMBL;Acc:Q3UY87] [ENSMUST00000115135]                  | -0.51                 | 0.029   | 0.477           |
| ENSMUST00000114274          | ENSMUST00000114274          | ens roundabout homolog 1 (Drosophila) Gene [Source:MGI (curated);Acc:MGI:1274781] [ENSMUST00000114274]          | -0.51                 | 0.014   | 0.412           |
| Ccdc18                      | NM_028481                   | ref Mus musculus coiled-coil domain containing 18 (Ccdc18), mRNA [NM_028481]                                    | -0.51                 | 0.005   | 0.355           |
| Lrit2                       | NM_173418                   | ref Mus musculus leucine-rich repeat, immunoglobulin-like and transmembrane domains 2 (Lrit2), mRNA [NM_173418] | -0.51                 | 0.043   | 0.511           |
| Igsf1                       | NM_183335                   | ref Mus musculus immunoglobulin superfamily, member 1 (Igsf1), transcript variant 3, mRNA [NM_183335]           | -0.52                 | 0.003   | 0.308           |
| Gm4922                      | NM_177706                   | ref Mus musculus predicted gene 4922 (Gm4922), mRNA [NM_177706]                                                 | -0.52                 | 0.017   | 0.433           |
| Cstad                       | NM_030137                   | ref Mus musculus CSA-conditional, T cell activation-dependent protein (Cstad), mRNA [NM_030137]                 | -0.52                 | 0.027   | 0.471           |
| 9130004C02Rik               | XM_001475643                | ref PREDICTED: Mus musculus RIKEN cDNA 9130004C02 gene (9130004C02Rik), mRNA [XM_001475643]                     | -0.52                 | 0.013   | 0.412           |
| LOC100048534                | ENSMUST00000096002          | ens D19Erd652e protein Fragment [Source:UniProtKB/TrEMBL;Acc:Q3B7X8] [ENSMUST00000096002]                       | -0.52                 | 0.028   | 0.476           |
| Olfir215                    | NM_146446                   | ref Mus musculus olfactory receptor 215 (Olfir215), mRNA [NM_146446]                                            | -0.52                 | 0.005   | 0.338           |
| chr8:18903599-18904143_F    | chr8:18903599-18904143_F    | lincRNA:chr8:18903599-18904143 forward strand                                                                   | -0.52                 | 0.021   | 0.450           |
| chr13:112337405-112356455_R | chr13:112337405-112356455_R | lincRNA:chr13:112337405-112356455 reverse strand                                                                | -0.52                 | 0.025   | 0.464           |
| chr1:134245856-134246607_F  | chr1:134245856-134246607_F  | lincRNA:chr1:134245856-134246607 forward strand                                                                 | -0.52                 | 0.024   | 0.458           |
| chr6:052032838-052033444    | chr6:052032838-052033444    | lincRNA:chr6:052032838-052033444 forward strand                                                                 | -0.52                 | 0.014   | 0.415           |
| Tex9                        | NM_009359                   | ref Mus musculus testis expressed gene 9 (Tex9), mRNA [NM_009359]                                               | -0.52                 | 0.018   | 0.435           |
| chr13:62117000-62164075_R   | chr13:62117000-62164075_R   | lincRNA:chr13:62117000-62164075 reverse strand                                                                  | -0.52                 | 0.044   | 0.512           |
| Kcnh5                       | NM_172805                   | ref Mus musculus potassium voltage-gated channel, subfamily H (eag-related), member 5 (Kcnh5), mRNA [NM_172805] | -0.52                 | 0.031   | 0.483           |
| Gm8482                      | XM_001000972                | ref PREDICTED: Mus musculus predicted gene, EG667148 (EG667148), mRNA [XM_001000972]                            | -0.52                 | 0.026   | 0.471           |
| Ly6g6d                      | NM_033478                   | ref Mus musculus lymphocyte antigen 6 complex, locus G6D (Ly6g6d), mRNA [NM_033478]                             | -0.52                 | 0.013   | 0.412           |
| Angptl1                     | NM_028333                   | ref Mus musculus angiopoietin-like 1 (Angptl1), mRNA [NM_028333]                                                | -0.52                 | 0.041   | 0.505           |
| Gm7969                      | XM_001473218                | ref PREDICTED: Mus musculus hypothetical LOC666185 (LOC666185), mRNA [XM_001473218]                             | -0.52                 | 0.014   | 0.414           |
| chr7:128341797-128414692_F  | chr7:128341797-128414692_F  | lincRNA:chr7:128341797-128414692 forward strand                                                                 | -0.52                 | 0.048   | 0.516           |
| Rtkn2                       | NM_001081346                | ref Mus musculus rhotekin 2 (Rtkn2), mRNA [NM_001081346]                                                        | -0.52                 | 0.032   | 0.485           |



Online Supplemental Table IV: mG4H-STZ Only

| Gene Symbol                 | RefSeq                      | Description                                                                                                                                                             | logFC<br>mG4H-<br>STZ | P-value | Adj.<br>P-value |
|-----------------------------|-----------------------------|-------------------------------------------------------------------------------------------------------------------------------------------------------------------------|-----------------------|---------|-----------------|
| Hoxd11                      | AK054090                    | gb Mus musculus 2 days pregnant adult female oviduct cDNA, RIKEN full-length enriched library, clone:E230017H14 product:homeo box D11, full insert sequence. [AK054090] | -0.52                 | 0.020   | 0.447           |
| Fam47e                      | NM_001170572                | ref Mus musculus family with sequence similarity 47, member E (Fam47e), transcript variant 3, mRNA [NM_001170572]                                                       | -0.53                 | 0.045   | 0.513           |
| chr10:95176634-95180141_R   | chr10:95176634-95180141_R   | lincRNA:chr10:95176634-95180141 reverse strand                                                                                                                          | -0.53                 | 0.032   | 0.485           |
| Kcnq2                       | NM_001003824                | ref Mus musculus potassium voltage-gated channel, subfamily Q, member 2 (Kcnq2), transcript variant 2, mRNA [NM_001003824]                                              | -0.53                 | 0.037   | 0.498           |
| 1190007F08Rik               | NM_001163721                | ref Mus musculus RIKEN cDNA 1190007F08 gene (1190007F08Rik), transcript variant 1, mRNA [NM_001163721]                                                                  | -0.53                 | 0.033   | 0.487           |
| chr15:59966962-59972812_R   | chr15:59966962-59972812_R   | lincRNA:chr15:59966962-59972812 reverse strand                                                                                                                          | -0.53                 | 0.018   | 0.437           |
| LOC100048560                | XM_001480899                | ref PREDICTED: Mus musculus hypothetical protein LOC100048560 (LOC100048560), mRNA [XM_001480899]                                                                       | -0.53                 | 0.019   | 0.437           |
| Gm7518                      | XM_974857                   | ref PREDICTED: Mus musculus predicted gene, EG665149 (EG665149), mRNA [XM_974857]                                                                                       | -0.53                 | 0.004   | 0.312           |
| Olfir1029                   | NM_001011852                | ref Mus musculus olfactory receptor 1029 (Olfir1029), mRNA [NM_001011852]                                                                                               | -0.53                 | 0.047   | 0.515           |
| chr14:67585234-67596823_F   | chr14:67585234-67596823_F   | lincRNA:chr14:67585234-67596823 forward strand                                                                                                                          | -0.53                 | 0.007   | 0.380           |
| chr15:100908725-100908912_F | chr15:100908725-100908912_F | lincRNA:chr15:100908725-100908912 forward strand                                                                                                                        | -0.53                 | 0.029   | 0.477           |
| Tmtc2                       | NM_177368                   | ref Mus musculus transmembrane and tetratricopeptide repeat containing 2 (Tmtc2), mRNA [NM_177368]                                                                      | -0.53                 | 0.007   | 0.382           |
| Lrtm2                       | NM_172492                   | ref Mus musculus leucine-rich repeats and transmembrane domains 2 (Lrtm2), transcript variant 1, mRNA [NM_172492]                                                       | -0.53                 | 0.040   | 0.504           |
| Nrp2                        | NM_001077406                | ref Mus musculus neuropilin 2 (Nrp2), transcript variant 5, mRNA [NM_001077406]                                                                                         | -0.53                 | 0.040   | 0.504           |
| Gcet2                       | NM_001159297                | ref Mus musculus germinal center expressed transcript 2 (Gcet2), transcript variant 1, mRNA [NM_001159297]                                                              | -0.53                 | 0.017   | 0.430           |
| 1600014C23Rik               | ENSMUST00000039106          | ens RIKEN cDNA 1600014C23 gene Gene [Source:MGI Symbol;Acc:MGI:1919490] [ENSMUST00000039106]                                                                            | -0.53                 | 0.025   | 0.464           |
| chr3:87575891-87576343_F    | chr3:87575891-87576343_F    | lincRNA:chr3:87575891-87576343 forward strand                                                                                                                           | -0.53                 | 0.005   | 0.351           |
| ENSMUST00000103743          | ENSMUST00000103743          | ens Ig lambda-3 chain C region [Source:UniProtKB/Swiss-Prot;Acc:P01845] [ENSMUST00000103743]                                                                            | -0.53                 | 0.047   | 0.514           |
| LOC100046894                | XM_001477017                | ref PREDICTED: Mus musculus similar to Igk-C protein (LOC100046894), mRNA [XM_001477017]                                                                                | -0.53                 | 0.046   | 0.513           |
| chr12:12876192-12918398_F   | chr12:12876192-12918398_F   | lincRNA:chr12:12876192-12918398 forward strand                                                                                                                          | -0.53                 | 0.024   | 0.461           |
| chr7:50509139-50526856_F    | chr7:50509139-50526856_F    | lincRNA:chr7:50509139-50526856 forward strand                                                                                                                           | -0.53                 | 0.022   | 0.452           |
| 2210415F13Rik               | NM_027339                   | ref Mus musculus RIKEN cDNA 2210415F13 gene (2210415F13Rik), transcript variant 2, mRNA [NM_027339]                                                                     | -0.53                 | 0.036   | 0.495           |
| chrX:122623597-122630826_F  | chrX:122623597-122630826_F  | lincRNA:chrX:122623597-122630826 forward strand                                                                                                                         | -0.53                 | 0.006   | 0.366           |
| LOC100044513                | XM_001472295                | ref PREDICTED: Mus musculus hypothetical protein LOC100044513 (LOC100044513), mRNA [XM_001472295]                                                                       | -0.53                 | 0.028   | 0.475           |
| chr4:116790373-116797823_F  | chr4:116790373-116797823_F  | lincRNA:chr4:116790373-116797823 forward strand                                                                                                                         | -0.53                 | 0.019   | 0.439           |
| Gm2592                      | XM_001474061                | ref PREDICTED: Mus musculus hypothetical protein LOC100040088 (LOC100040088), mRNA [XM_001474061]                                                                       | -0.54                 | 0.049   | 0.519           |



Online Supplemental Table IV: mG4H-STZ Only

| Gene Symbol                | RefSeq                     | Description                                                                                                                                                    | logFC<br>mG4H-<br>STZ | P-value | Adj.<br>P-value |
|----------------------------|----------------------------|----------------------------------------------------------------------------------------------------------------------------------------------------------------|-----------------------|---------|-----------------|
| 6430590A10Rik              | XM_001480263               | ref PREDICTED: Mus musculus hypothetical protein LOC100048220 (LOC100048220), mRNA [XM_001480263]                                                              | -0.54                 | 0.038   | 0.499           |
| Gm5132                     | NM_001085517               | ref Mus musculus predicted gene 5132 (Gm5132), mRNA [NM_001085517]                                                                                             | -0.54                 | 0.025   | 0.464           |
| Gm2458                     | XM_001473661               | ref PREDICTED: Mus musculus hypothetical protein LOC100039850 (LOC100039850), mRNA [XM_001473661]                                                              | -0.54                 | 0.045   | 0.513           |
| Dclk3                      | NM_172928                  | ref Mus musculus doublecortin-like kinase 3 (Dclk3), mRNA [NM_172928]                                                                                          | -0.54                 | 0.042   | 0.508           |
| Gm3646                     | NM_001177348               | ref Mus musculus predicted gene 3646 (Gm3646), mRNA [NM_001177348]                                                                                             | -0.54                 | 0.013   | 0.412           |
| chr8:114477602-114488627_F | chr8:114477602-114488627_F | lincRNA:chr8:114477602-114488627 forward strand                                                                                                                | -0.54                 | 0.016   | 0.425           |
| chr14:20893694-20903726_F  | chr14:20893694-20903726_F  | lincRNA:chr14:20893694-20903726 forward strand                                                                                                                 | -0.54                 | 0.047   | 0.514           |
| chr3:58118325-58136550_R   | chr3:58118325-58136550_R   | lincRNA:chr3:58118325-58136550 reverse strand                                                                                                                  | -0.54                 | 0.036   | 0.495           |
| Vmn2r96                    | NM_001104547               | ref Mus musculus vomeronasal 2, receptor 96 (Vmn2r96), mRNA [NM_001104547]                                                                                     | -0.54                 | 0.046   | 0.513           |
| Klrb1c                     | NM_008527                  | ref Mus musculus killer cell lectin-like receptor subfamily B member 1C (Klrb1c), transcript variant 2, mRNA [NM_008527]                                       | -0.54                 | 0.030   | 0.477           |
| chr13:19611679-19620954_R  | chr13:19611679-19620954_R  | lincRNA:chr13:19611679-19620954 reverse strand                                                                                                                 | -0.54                 | 0.028   | 0.474           |
| chr9:75316023-75344401_F   | chr9:75316023-75344401_F   | lincRNA:chr9:75316023-75344401 forward strand                                                                                                                  | -0.54                 | 0.036   | 0.495           |
| chr19:40663924-40669352_F  | chr19:40663924-40669352_F  | lincRNA:chr19:40663924-40669352 forward strand                                                                                                                 | -0.54                 | 0.015   | 0.419           |
| BC050972                   | BC050972                   | gb Mus musculus cDNA clone IMAGE:6742492. [BC050972]                                                                                                           | -0.54                 | 0.029   | 0.477           |
| Fzd2                       | NM_020510                  | ref Mus musculus frizzled homolog 2 (Drosophila) (Fzd2), mRNA [NM_020510]                                                                                      | -0.54                 | 0.005   | 0.341           |
| Gm9422                     | XM_001004541               | ref PREDICTED: Mus musculus predicted gene, EG668902 (EG668902), mRNA [XM_001004541]                                                                           | -0.54                 | 0.029   | 0.477           |
| LOC100045653               | NR_027377                  | ref Mus musculus hypothetical LOC100045653 (LOC100045653), non-coding RNA [NR_027377]                                                                          | -0.54                 | 0.045   | 0.513           |
| 2610109H07Rik              | NM_027426                  | ref Mus musculus RIKEN cDNA 2610109H07 gene (2610109H07Rik), mRNA [NM_027426]                                                                                  | -0.54                 | 0.038   | 0.499           |
| chr1:87343550-87362900_F   | chr1:87343550-87362900_F   | lincRNA:chr1:87343550-87362900 forward strand                                                                                                                  | -0.54                 | 0.026   | 0.468           |
| chr8:71938275-72113375_F   | chr8:71938275-72113375_F   | lincRNA:chr8:71938275-72113375 forward strand                                                                                                                  | -0.54                 | 0.022   | 0.451           |
| Kcnq1ot1                   | NR_001461                  | ref Mus musculus KCNQ1 overlapping transcript 1 (Kcnq1ot1), non-coding RNA [NR_001461]                                                                         | -0.55                 | 0.017   | 0.433           |
| P2rx2                      | NM_001164834               | ref Mus musculus purinergic receptor P2X, ligand-gated ion channel, 2 (P2rx2), transcript variant 3, mRNA [NM_001164834]                                       | -0.55                 | 0.022   | 0.452           |
| 9630013K17Rik              | AK020677                   | gb Mus musculus 16 days neonate cerebellum cDNA, RIKEN full-length enriched library, clone:9630013K17 product:unclassifiable, full insert sequence. [AK020677] | -0.55                 | 0.005   | 0.346           |
| Fbxo25                     | NM_025785                  | ref Mus musculus F-box protein 25 (Fbxo25), mRNA [NM_025785]                                                                                                   | -0.55                 | 0.018   | 0.436           |
| Rgs9bp                     | NM_145840                  | ref Mus musculus regulator of G-protein signalling 9 binding protein (Rgs9bp), mRNA [NM_145840]                                                                | -0.55                 | 0.038   | 0.499           |
| 9430083A17Rik              | NR_029463                  | ref Mus musculus RIKEN cDNA 9430083A17 gene (9430083A17Rik), non-coding RNA [NR_029463]                                                                        | -0.55                 | 0.013   | 0.412           |
| chr4:118723941-118757032_R | chr4:118723941-118757032_R | lincRNA:chr4:118723941-118757032 reverse strand                                                                                                                | -0.55                 | 0.015   | 0.419           |
| ENSMUST00000050671         | ENSMUST00000050671         | ens RIKEN cDNA 4930426D05 gene Gene [Source:MGI Symbol;Acc:MGI:1921894] [ENSMUST00000050671]                                                                   | -0.55                 | 0.017   | 0.430           |
| Vmn1r38                    | NM_134168                  | ref Mus musculus vomeronasal 1 receptor 38 (Vmn1r38), mRNA [NM_134168]                                                                                         | -0.55                 | 0.033   | 0.487           |

Online Supplemental Table IV: mG4H-STZ Only

| Gene Symbol                 | RefSeq                      | Description                                                                                             | logFC<br>mG4H-<br>STZ | P-value | Adj.<br>P-value |
|-----------------------------|-----------------------------|---------------------------------------------------------------------------------------------------------|-----------------------|---------|-----------------|
| chr9:100977450-100989325_R  | chr9:100977450-100989325_R  | lincRNA:chr9:100977450-100989325 reverse strand                                                         | -0.55                 | 0.022   | 0.451           |
| Vmn2r16                     | NM_001104627                | ref Mus musculus vomeronasal 2, receptor 16 (Vmn2r16), mRNA [NM_001104627]                              | -0.55                 | 0.011   | 0.406           |
| LOC100045944                | XM_001475225                | ref PREDICTED: Mus musculus hypothetical protein LOC100045944 (LOC100045944), mRNA [XM_001475225]       | -0.55                 | 0.005   | 0.349           |
| Mttr15                      | NM_177893                   | ref Mus musculus myotubularin related protein 15 (Mttr15), mRNA [NM_177893]                             | -0.55                 | 0.013   | 0.412           |
| chr10:76114741-76115073_F   | chr10:76114741-76115073_F   | lincRNA:chr10:76114741-76115073 forward strand                                                          | -0.55                 | 0.012   | 0.408           |
| Gm5107                      | XM_897537                   | ref PREDICTED: Mus musculus predicted gene, EG330070 (EG330070), mRNA [XM_897537]                       | -0.55                 | 0.029   | 0.477           |
| ENSMUST00000066533          | ENSMUST00000066533          | ens G protein-coupled receptor 112 Gene [Source:MGI (curated);Acc:MGI:2685213] [ENSMUST00000066533]     | -0.55                 | 0.043   | 0.511           |
| chr14:105987405-106063477_R | chr14:105987405-106063477_R | lincRNA:chr14:105987405-106063477 reverse strand                                                        | -0.55                 | 0.005   | 0.346           |
| chr5:22058025-22072475_F    | chr5:22058025-22072475_F    | lincRNA:chr5:22058025-22072475 forward strand                                                           | -0.55                 | 0.002   | 0.266           |
| 6030498E09Rik               | NM_183126                   | ref Mus musculus RIKEN cDNA 6030498E09 gene (6030498E09Rik), mRNA [NM_183126]                           | -0.55                 | 0.029   | 0.477           |
| ENSMUST00000100029          | ENSMUST00000100029          | ens Putative uncharacterized protein [Source:UniProtKB/TrEMBL;Acc:Q3V3T4] [ENSMUST00000100029]          | -0.55                 | 0.039   | 0.501           |
| Zfp40                       | NM_009555                   | ref Mus musculus zinc finger protein 40 (Zfp40), mRNA [NM_009555]                                       | -0.55                 | 0.034   | 0.493           |
| Mex3b                       | NM_175366                   | ref Mus musculus mex3 homolog B (C. elegans) (Mex3b), mRNA [NM_175366]                                  | -0.55                 | 0.013   | 0.412           |
| Abca14                      | NM_026458                   | ref Mus musculus ATP-binding cassette, sub-family A (ABC1), member 14 (Abca14), mRNA [NM_026458]        | -0.55                 | 0.043   | 0.510           |
| Pde4b                       | NM_019840                   | ref Mus musculus phosphodiesterase 4B, cAMP specific (Pde4b), transcript variant 1, mRNA [NM_019840]    | -0.55                 | 0.014   | 0.418           |
| Zfp820                      | NM_029281                   | ref Mus musculus zinc finger protein 820 (Zfp820), mRNA [NM_029281]                                     | -0.55                 | 0.013   | 0.412           |
| Vmn2r103                    | NM_001104565                | ref Mus musculus vomeronasal 2, receptor 103 (Vmn2r103), mRNA [NM_001104565]                            | -0.56                 | 0.050   | 0.520           |
| chrX:20555593-20591971_F    | chrX:20555593-20591971_F    | lincRNA:chrX:20555593-20591971 forward strand                                                           | -0.56                 | 0.010   | 0.401           |
| 4933427E11Rik               | NR_033197                   | ref Mus musculus RIKEN cDNA 4933427E11 gene (4933427E11Rik), non-coding RNA [NR_033197]                 | -0.56                 | 0.041   | 0.505           |
| Lca5                        | NM_027448                   | ref Mus musculus Leber congenital amaurosis 5 (human) (Lca5), transcript variant 2, mRNA [NM_027448]    | -0.56                 | 0.013   | 0.412           |
| chr3:60288326-60288925_R    | chr3:60288326-60288925_R    | lincRNA:chr3:60288326-60288925 reverse strand                                                           | -0.56                 | 0.011   | 0.407           |
| Fgd2                        | NM_013710                   | ref Mus musculus FYVE, RhoGEF and PH domain containing 2 (Fgd2), transcript variant 2, mRNA [NM_013710] | -0.56                 | 0.026   | 0.470           |
| chr11:31643114-31643595_F   | chr11:31643114-31643595_F   | lincRNA:chr11:31643114-31643595 forward strand                                                          | -0.56                 | 0.015   | 0.418           |
| ENSMUST00000098610          | ENSMUST00000098610          | ens Putative uncharacterized protein [Source:UniProtKB/TrEMBL;Acc:Q3V3P5] [ENSMUST00000098610]          | -0.56                 | 0.049   | 0.519           |
| chr19:27448093-27462793_R   | chr19:27448093-27462793_R   | lincRNA:chr19:27448093-27462793 reverse strand                                                          | -0.56                 | 0.037   | 0.497           |
| chr17:45525567-45526189_R   | chr17:45525567-45526189_R   | lincRNA:chr17:45525567-45526189 reverse strand                                                          | -0.56                 | 0.049   | 0.519           |
| Zfp560                      | NM_001004190                | ref Mus musculus zinc finger protein 560 (Zfp560), mRNA [NM_001004190]                                  | -0.56                 | 0.019   | 0.439           |
| chr18:67435075-67447150_F   | chr18:67435075-67447150_F   | lincRNA:chr18:67435075-67447150 forward strand                                                          | -0.56                 | 0.016   | 0.426           |
| Hsf3                        | NM_172931                   | ref Mus musculus heat shock transcription factor 3 (Hsf3), mRNA [NM_172931]                             | -0.56                 | 0.036   | 0.495           |
| chr9:67414463-67483185_R    | chr9:67414463-67483185_R    | lincRNA:chr9:67414463-67483185 reverse strand                                                           | -0.56                 | 0.023   | 0.456           |

Online Supplemental Table IV: mG4H-STZ Only

| Gene Symbol                      | RefSeq                    | Description                                                                                                                                                                                                              | logFC<br>mG4H-<br>STZ | P-value | Adj.<br>P-value |
|----------------------------------|---------------------------|--------------------------------------------------------------------------------------------------------------------------------------------------------------------------------------------------------------------------|-----------------------|---------|-----------------|
| <b>Olf1416</b>                   | NM_147038                 | ref Mus musculus olfactory receptor 1416 (Olf1416), mRNA [NM_147038]                                                                                                                                                     | -0.56                 | 0.029   | 0.477           |
| <b>ENSMUST00000109329</b>        | ENSMUST00000109329        | ens lymphocyte cytosolic protein 2 Gene [Source:MGI (curated);Acc:MGI:1321402] [ENSMUST00000109329]                                                                                                                      | -0.56                 | 0.022   | 0.452           |
| <b>Rnf222</b>                    | NM_177060                 | ref Mus musculus ring finger protein 222 (Rnf222), mRNA [NM_177060]                                                                                                                                                      | -0.57                 | 0.004   | 0.315           |
| <b>4931423N10Rik</b>             | NM_027635                 | ref Mus musculus RIKEN cDNA 4931423N10 gene (4931423N10Rik), mRNA [NM_027635]                                                                                                                                            | -0.57                 | 0.006   | 0.366           |
| <b>Klra23</b>                    | NM_024470                 | ref Mus musculus killer cell lectin-like receptor subfamily A, member 23 (Klra23), mRNA [NM_024470]                                                                                                                      | -0.57                 | 0.014   | 0.416           |
| <b>Arhgef15</b>                  | AK051749                  | gb Mus musculus 12 days embryo spinal ganglion cDNA, RIKEN full-length enriched library, clone:D130071N09 product:hypothetical Dbl domain (dbl/cdc24 rhoGEF family) containing protein, full insert sequence. [AK051749] | -0.57                 | 0.019   | 0.437           |
| <b>Efcab4b</b>                   | NM_001033464              | ref Mus musculus EF-hand calcium binding domain 4B (Efcab4b), mRNA [NM_001033464]                                                                                                                                        | -0.57                 | 0.013   | 0.412           |
| <b>Klhl22</b>                    | XM_001475578              | ref PREDICTED: Mus musculus hypothetical protein LOC100046098 (LOC100046098), mRNA [XM_001475578]                                                                                                                        | -0.57                 | 0.010   | 0.401           |
| <b>ENSMUST00000101487</b>        | ENSMUST00000101487        | ens RIKEN cDNA F730043M19 gene Gene [Source:MGI Symbol;Acc:MGI:2443237] [ENSMUST00000101487]                                                                                                                             | -0.57                 | 0.014   | 0.412           |
| <b>Zbtb3</b>                     | NM_133759                 | ref Mus musculus zinc finger and BTB domain containing 3 (Zbtb3), transcript variant 2, mRNA [NM_133759]                                                                                                                 | -0.57                 | 0.046   | 0.513           |
| <b>Pabpc6</b>                    | NM_001163836              | ref Mus musculus poly(A) binding protein, cytoplasmic 6 (Pabpc6), mRNA [NM_001163836]                                                                                                                                    | -0.57                 | 0.024   | 0.461           |
| <b>Gm2019</b>                    | XM_001472162              | ref PREDICTED: Mus musculus similar to Ubtf protein (LOC100039048), mRNA [XM_001472162]                                                                                                                                  | -0.57                 | 0.048   | 0.518           |
| <b>ENSMUST00000094564</b>        | ENSMUST00000094564        | ens PQ loop repeat containing 2 Gene [Source:MGI (curated);Acc:MGI:2384837] [ENSMUST00000094564]                                                                                                                         | -0.57                 | 0.040   | 0.502           |
| <b>Dok4</b>                      | NM_053246                 | ref Mus musculus docking protein 4 (Dok4), mRNA [NM_053246]                                                                                                                                                              | -0.57                 | 0.035   | 0.495           |
| <b>Efhc1</b>                     | NM_027974                 | ref Mus musculus EF-hand domain (C-terminal) containing 1 (Efhc1), mRNA [NM_027974]                                                                                                                                      | -0.58                 | 0.036   | 0.495           |
| <b>Gm5134</b>                    | NM_198635                 | ref Mus musculus predicted gene 5134 (Gm5134), mRNA [NM_198635]                                                                                                                                                          | -0.58                 | 0.027   | 0.472           |
| <b>4921517D22Rik</b>             | NM_183290                 | ref Mus musculus RIKEN cDNA 4921517D22 gene (4921517D22Rik), mRNA [NM_183290]                                                                                                                                            | -0.58                 | 0.046   | 0.513           |
| <b>Mageb5</b>                    | NM_028847                 | ref Mus musculus melanoma antigen, family B, 5 (Mageb5), mRNA [NM_028847]                                                                                                                                                | -0.58                 | 0.018   | 0.435           |
| <b>Gm3693</b>                    | XM_001477943              | ref PREDICTED: Mus musculus hypothetical protein LOC100042143 (LOC100042143), mRNA [XM_001477943]                                                                                                                        | -0.58                 | 0.031   | 0.480           |
| <b>Klrk1</b>                     | NM_033078                 | ref Mus musculus killer cell lectin-like receptor subfamily K, member 1 (Klrk1), transcript variant 1, mRNA [NM_033078]                                                                                                  | -0.58                 | 0.046   | 0.514           |
| <b>Klra15</b>                    | NM_013793                 | ref Mus musculus killer cell lectin-like receptor, subfamily A, member 15 (Klra15), mRNA [NM_013793]                                                                                                                     | -0.58                 | 0.006   | 0.366           |
| <b>AW011738</b>                  | NR_030671                 | ref Mus musculus expressed sequence AW011738 (AW011738), non-coding RNA [NR_030671]                                                                                                                                      | -0.58                 | 0.003   | 0.306           |
| <b>Cmah</b>                      | NM_001111110              | ref Mus musculus cytidine monophospho-N-acetylneuraminic acid hydroxylase (Cmah), transcript variant 2, mRNA [NM_001111110]                                                                                              | -0.58                 | 0.010   | 0.401           |
| <b>Olf1189</b>                   | NM_146772                 | ref Mus musculus olfactory receptor 1189 (Olf1189), mRNA [NM_146772]                                                                                                                                                     | -0.58                 | 0.026   | 0.468           |
| <b>AI746383</b>                  | AI746383                  | gb ul06c11.x1 Sugano mouse kidney mkia Mus musculus cDNA clone IMAGE:2065268 3'. [AI746383]                                                                                                                              | -0.58                 | 0.039   | 0.501           |
| <b>chr5:74487385-74497428_R</b>  | chr5:74487385-74497428_R  | lincRNA:chr5:74487385-74497428 reverse strand                                                                                                                                                                            | -0.58                 | 0.023   | 0.456           |
| <b>chr13:98038568-98068079_R</b> | chr13:98038568-98068079_R | lincRNA:chr13:98038568-98068079 reverse strand                                                                                                                                                                           | -0.58                 | 0.005   | 0.352           |

Online Supplemental Table IV: mG4H-STZ Only

| Gene Symbol                | RefSeq                     | Description                                                                                                                                            | logFC<br>mG4H-<br>STZ | P-value | Adj.<br>P-value |
|----------------------------|----------------------------|--------------------------------------------------------------------------------------------------------------------------------------------------------|-----------------------|---------|-----------------|
| ENSMUST00000100814         | ENSMUST00000100814         | ens Putative uncharacterized protein [Source:UniProtKB/TrEMBL;Acc:Q3V428] [ENSMUST00000100814]                                                         | -0.58                 | 0.021   | 0.447           |
| chr14:21449863-21450640_R  | chr14:21449863-21450640_R  | lincRNA:chr14:21449863-21450640 reverse strand                                                                                                         | -0.58                 | 0.016   | 0.426           |
| ENSMUST00000103481         | ENSMUST00000103481         | ens Ig heavy chain V region M315 Precursor [Source:UniProtKB/Swiss-Prot;Acc:P18531] [ENSMUST00000103481]                                               | -0.58                 | 0.027   | 0.471           |
| Tnfrsf13c                  | NM_028075                  | ref Mus musculus tumor necrosis factor receptor superfamily, member 13c (Tnfrsf13c), mRNA [NM_028075]                                                  | -0.58                 | 0.050   | 0.520           |
| Bcl6b                      | NM_007528                  | ref Mus musculus B-cell CLL/lymphoma 6, member B (Bcl6b), mRNA [NM_007528]                                                                             | -0.59                 | 0.048   | 0.516           |
| Klra6                      | NM_008464                  | ref Mus musculus killer cell lectin-like receptor, subfamily A, member 6 (Klra6), mRNA [NM_008464]                                                     | -0.59                 | 0.008   | 0.391           |
| XM_001472404               | XM_001472404               | ref PREDICTED: Mus musculus immunoglobulin heavy chain complex (Igh), mRNA [XM_001472404]                                                              | -0.59                 | 0.035   | 0.493           |
| Pou1f1                     | NM_008849                  | ref Mus musculus POU domain, class 1, transcription factor 1 (Pou1f1), mRNA [NM_008849]                                                                | -0.59                 | 0.039   | 0.500           |
| 4632411P08Rik              | AK019492                   | gb Mus musculus 0 day neonate skin cDNA, RIKEN full-length enriched library, clone:4632411P08 product:unclassifiable, full insert sequence. [AK019492] | -0.59                 | 0.016   | 0.425           |
| Astn1                      | NM_007495                  | ref Mus musculus astrotactin 1 (Astn1), mRNA [NM_007495]                                                                                               | -0.59                 | 0.013   | 0.412           |
| Maneal                     | NM_001007573               | ref Mus musculus mannosidase, endo-alpha-like (Maneal), mRNA [NM_001007573]                                                                            | -0.59                 | 0.027   | 0.472           |
| chr17:6426800-6528950_F    | chr17:6426800-6528950_F    | lincRNA:chr17:6426800-6528950 forward strand                                                                                                           | -0.59                 | 0.003   | 0.308           |
| Txndc3                     | NM_001167909               | ref Mus musculus thioredoxin domain containing 3 (spermatzoa) (Txndc3), transcript variant 2, mRNA [NM_001167909]                                      | -0.59                 | 0.041   | 0.504           |
| chr16:98218292-98230170_F  | chr16:98218292-98230170_F  | lincRNA:chr16:98218292-98230170 forward strand                                                                                                         | -0.59                 | 0.012   | 0.408           |
| Cml3                       | NM_001037842               | ref Mus musculus camello-like 3 (Cml3), transcript variant 1, mRNA [NM_001037842]                                                                      | -0.59                 | 0.037   | 0.496           |
| Csn1s2b                    | NM_009973                  | ref Mus musculus casein alpha s2-like B (Csn1s2b), mRNA [NM_009973]                                                                                    | -0.59                 | 0.030   | 0.479           |
| ENSMUST00000098313         | ENSMUST00000098313         | ens cathepsin C Gene [Source:MGI (curated);Acc:MGI:109553] [ENSMUST00000098313]                                                                        | -0.59                 | 0.013   | 0.412           |
| Chek2                      | NM_016681                  | ref Mus musculus CHK2 checkpoint homolog (S. pombe) (Chek2), mRNA [NM_016681]                                                                          | -0.59                 | 0.010   | 0.404           |
| Ino80d                     | ENSMUST00000046020         | ens INO80 complex subunit D Gene [Source:MGI (curated);Acc:MGI:3027003] [ENSMUST00000046020]                                                           | -0.60                 | 0.039   | 0.501           |
| Olf6                       | NM_206897                  | ref Mus musculus olfactory receptor 6 (Olf6), mRNA [NM_206897]                                                                                         | -0.60                 | 0.019   | 0.437           |
| Gm2181                     | XM_001472754               | ref PREDICTED: Mus musculus similar to Mnn4p (LOC100039361), mRNA [XM_001472754]                                                                       | -0.60                 | 0.007   | 0.370           |
| Ccdc122                    | NM_175369                  | ref Mus musculus coiled-coil domain containing 122 (Ccdc122), mRNA [NM_175369]                                                                         | -0.60                 | 0.003   | 0.302           |
| ENSMUST00000055893         | ENSMUST00000055893         | ens EF-hand calcium binding domain 8 Gene [Source:MGI (curated);Acc:MGI:3644206] [ENSMUST00000055893]                                                  | -0.60                 | 0.026   | 0.470           |
| chr5:108538417-108550517_R | chr5:108538417-108550517_R | lincRNA:chr5:108538417-108550517 reverse strand                                                                                                        | -0.60                 | 0.026   | 0.469           |
| chr8:89996710-90049453_F   | chr8:89996710-90049453_F   | lincRNA:chr8:89996710-90049453 forward strand                                                                                                          | -0.60                 | 0.041   | 0.504           |
| chr13:19611679-19620954_R  | chr13:19611679-19620954_R  | lincRNA:chr13:19611679-19620954 reverse strand                                                                                                         | -0.60                 | 0.005   | 0.346           |
| Tcrg-C                     | ENSMUST00000103564         | ens T-cell receptor gamma chain V region 5/10-13 Precursor [Source:UniProtKB/Swiss-Prot;Acc:P06325] [ENSMUST00000103564]                               | -0.60                 | 0.017   | 0.432           |
| chr2:174088550-174109425_F | chr2:174088550-174109425_F | lincRNA:chr2:174088550-174109425 forward strand                                                                                                        | -0.61                 | 0.037   | 0.497           |

Online Supplemental Table IV: mG4H-STZ Only

| Gene Symbol                | RefSeq                     | Description                                                                                                                                                                                       | logFC<br>mG4H-<br>STZ | P-value | Adj.<br>P-value |
|----------------------------|----------------------------|---------------------------------------------------------------------------------------------------------------------------------------------------------------------------------------------------|-----------------------|---------|-----------------|
| chr1:179198249-179198560_R | chr1:179198249-179198560_R | lincRNA:chr1:179198249-179198560 reverse strand                                                                                                                                                   | -0.61                 | 0.026   | 0.471           |
| chr18:47327300-47333819_F  | chr18:47327300-47333819_F  | lincRNA:chr18:47327300-47333819 forward strand                                                                                                                                                    | -0.61                 | 0.004   | 0.338           |
| chr13:71021825-71023381_F  | chr13:71021825-71023381_F  | lincRNA:chr13:71021825-71023381 forward strand                                                                                                                                                    | -0.61                 | 0.031   | 0.483           |
| Tmco3                      | NM_172282                  | ref Mus musculus transmembrane and coiled-coil domains 3 (Tmco3), mRNA [NM_172282]                                                                                                                | -0.61                 | 0.029   | 0.477           |
| LOC100046618               | XM_001476513               | ref PREDICTED: Mus musculus similar to ribosomal protein (LOC100046618), mRNA [XM_001476513]                                                                                                      | -0.61                 | 0.016   | 0.425           |
| Tktl2                      | NM_028927                  | ref Mus musculus transketolase-like 2 (Tktl2), mRNA [NM_028927]                                                                                                                                   | -0.61                 | 0.007   | 0.381           |
| chr15:66685663-66686113_R  | chr15:66685663-66686113_R  | lincRNA:chr15:66685663-66686113 reverse strand                                                                                                                                                    | -0.61                 | 0.017   | 0.432           |
| 9530056K15Rik              | AK035765                   | gb Mus musculus 16 days neonate cerebellum cDNA, RIKEN full-length enriched library, clone:9630002I21 product:unclassifiable, full insert sequence. [AK035765]                                    | -0.61                 | 0.002   | 0.281           |
| 6720422M22Rik              | AK032738                   | gb Mus musculus 12 days embryo male wolffian duct includes surrounding region cDNA, RIKEN full-length enriched library, clone:6720422M22 product:unclassifiable, full insert sequence. [AK032738] | -0.61                 | 0.049   | 0.519           |
| Pxdn                       | NM_181395                  | ref Mus musculus peroxidase homolog (Drosophila) (Pxdn), mRNA [NM_181395]                                                                                                                         | -0.61                 | 0.049   | 0.519           |
| chr4:99548675-99598875_R   | chr4:99548675-99598875_R   | lincRNA:chr4:99548675-99598875 reverse strand                                                                                                                                                     | -0.61                 | 0.029   | 0.477           |
| LOC100046336               | XM_001476035               | ref PREDICTED: Mus musculus hypothetical protein LOC100046336 (LOC100046336), mRNA [XM_001476035]                                                                                                 | -0.61                 | 0.030   | 0.477           |
| LOC100048388               | XM_001480465               | ref PREDICTED: Mus musculus hypothetical protein LOC100048388 (LOC100048388), mRNA [XM_001480465]                                                                                                 | -0.61                 | 0.042   | 0.508           |
| A930028C08Rik              | BC024827                   | gb Mus musculus RIKEN cDNA A930028C08 gene, mRNA (cDNA clone IMAGE:5357505), with apparent retained intron. [BC024827]                                                                            | -0.61                 | 0.022   | 0.450           |
| Ms4a8a                     | NM_022430                  | ref Mus musculus membrane-spanning 4-domains, subfamily A, member 8A (Ms4a8a), mRNA [NM_022430]                                                                                                   | -0.62                 | 0.005   | 0.355           |
| Adam26a                    | NM_010085                  | ref Mus musculus a disintegrin and metalloproteinase domain 26A (testase 3) (Adam26a), mRNA [NM_010085]                                                                                           | -0.62                 | 0.018   | 0.437           |
| Kcne1l                     | NM_021487                  | ref Mus musculus potassium voltage-gated channel, Isk-related family, member 1-like, pseudogene (Kcne1l), mRNA [NM_021487]                                                                        | -0.62                 | 0.011   | 0.407           |
| Ddi1                       | NM_027942                  | ref Mus musculus DDI1, DNA-damage inducible 1, homolog 1 (S. cerevisiae) (Ddi1), mRNA [NM_027942]                                                                                                 | -0.62                 | 0.044   | 0.512           |
| AU021884                   | BG068077                   | gb H3061E03-3 NIA Mouse 15K cDNA Clone Set Mus musculus cDNA clone H3061E03 3', mRNA sequence [BG068077]                                                                                          | -0.62                 | 0.019   | 0.437           |
| LOC100039041               | XM_001472141               | ref PREDICTED: Mus musculus similar to Sycp3 like Y-linked (LOC100039041), mRNA [XM_001472141]                                                                                                    | -0.62                 | 0.046   | 0.513           |
| Clec3a                     | NM_001007223               | ref Mus musculus C-type lectin domain family 3, member a (Clec3a), mRNA [NM_001007223]                                                                                                            | -0.62                 | 0.022   | 0.452           |
| Ccdc67                     | NM_181816                  | ref Mus musculus coiled-coil domain containing 67 (Ccdc67), mRNA [NM_181816]                                                                                                                      | -0.62                 | 0.010   | 0.401           |
| Gm6401                     | XM_891604                  | ref PREDICTED: Mus musculus predicted gene, EG623168 (EG623168), mRNA [XM_891604]                                                                                                                 | -0.62                 | 0.003   | 0.293           |
| A830005F24Rik              | ENSMUST00000065465         | ens RIKEN cDNA A830005F24 gene Gene [Source:MGI Symbol;Acc:MGI:3045249] [ENSMUST00000065465]                                                                                                      | -0.62                 | 0.019   | 0.437           |
| Ccdc88c                    | NM_026681                  | ref Mus musculus coiled-coil domain containing 88C (Ccdc88c), mRNA [NM_026681]                                                                                                                    | -0.62                 | 0.001   | 0.227           |
| chr2:130697320-130729670_R | chr2:130697320-130729670_R | lincRNA:chr2:130697320-130729670 reverse strand                                                                                                                                                   | -0.62                 | 0.000   | 0.148           |
| chr10:76114741-76115073_F  | chr10:76114741-76115073_F  | lincRNA:chr10:76114741-76115073 forward strand                                                                                                                                                    | -0.63                 | 0.005   | 0.353           |



Online Supplemental Table IV: mG4H-STZ Only

| Gene Symbol                | RefSeq                     | Description                                                                                                                                           | logFC<br>mG4H-<br>STZ | P-value | Adj.<br>P-value |
|----------------------------|----------------------------|-------------------------------------------------------------------------------------------------------------------------------------------------------|-----------------------|---------|-----------------|
| chr1:85304494-85305390_R   | chr1:85304494-85305390_R   | lincRNA:chr1:85304494-85305390 reverse strand                                                                                                         | -0.63                 | 0.009   | 0.394           |
| chr1:64686823-64728598_F   | chr1:64686823-64728598_F   | lincRNA:chr1:64686823-64728598 forward strand                                                                                                         | -0.63                 | 0.007   | 0.384           |
| ENSMUST00000034333         | ENSMUST00000034333         | ens RIKEN cDNA 9030420J04 gene Gene [Source:MGI Symbol;Acc:MGI:1918794] [ENSMUST00000034333]                                                          | -0.63                 | 0.036   | 0.495           |
| Gm4979                     | NM_001142411               | ref Mus musculus predicted gene 4979 (Gm4979), mRNA [NM_001142411]                                                                                    | -0.63                 | 0.017   | 0.429           |
| 1700120O09Rik              | AK007219                   | gb Mus musculus adult male testis cDNA, RIKEN full-length enriched library, clone:1700120O09 product:unclassifiable, full insert sequence. [AK007219] | -0.63                 | 0.004   | 0.329           |
| chr14:65436123-65436905_R  | chr14:65436123-65436905_R  | lincRNA:chr14:65436123-65436905 reverse strand                                                                                                        | -0.63                 | 0.004   | 0.330           |
| LOC100045498               | XM_001474406               | ref PREDICTED: Mus musculus hypothetical protein LOC100045498 (LOC100045498), mRNA [XM_001474406]                                                     | -0.63                 | 0.046   | 0.513           |
| chr13:74516152-74528284_R  | chr13:74516152-74528284_R  | lincRNA:chr13:74516152-74528284 reverse strand                                                                                                        | -0.63                 | 0.003   | 0.299           |
| Pigh                       | NM_029988                  | ref Mus musculus phosphatidylinositol glycan anchor biosynthesis, class H (Pigh), mRNA [NM_029988]                                                    | -0.63                 | 0.028   | 0.474           |
| Epb4.1l5                   | NM_001113416               | ref Mus musculus erythrocyte protein band 4.1-like 5 (Epb4.1l5), transcript variant 2, mRNA [NM_001113416]                                            | -0.63                 | 0.031   | 0.480           |
| Vmn1r211                   | NM_134243                  | ref Mus musculus vomeronasal 1 receptor 211 (Vmn1r211), mRNA [NM_134243]                                                                              | -0.63                 | 0.010   | 0.401           |
| Gm9776                     | XM_001472542               | ref PREDICTED: Mus musculus predicted gene, ENSMUSG00000042857 (ENSMUSG00000042857), mRNA [XM_001472542]                                              | -0.63                 | 0.011   | 0.407           |
| chr5:122982442-123000053_F | chr5:122982442-123000053_F | lincRNA:chr5:122982442-123000053 forward strand                                                                                                       | -0.64                 | 0.035   | 0.493           |
| chr6:136440100-136450050_R | chr6:136440100-136450050_R | lincRNA:chr6:136440100-136450050 reverse strand                                                                                                       | -0.64                 | 0.015   | 0.421           |
| chr8:37590189-37590632_F   | chr8:37590189-37590632_F   | lincRNA:chr8:37590189-37590632 forward strand                                                                                                         | -0.64                 | 0.028   | 0.476           |
| chr9:50961285-50962539_R   | chr9:50961285-50962539_R   | lincRNA:chr9:50961285-50962539 reverse strand                                                                                                         | -0.64                 | 0.004   | 0.312           |
| chr13:5506700-5519000_R    | chr13:5506700-5519000_R    | lincRNA:chr13:5506700-5519000 reverse strand                                                                                                          | -0.64                 | 0.037   | 0.496           |
| Kcnj13                     | NM_001110227               | ref Mus musculus potassium inwardly-rectifying channel, subfamily J, member 13 (Kcnj13), mRNA [NM_001110227]                                          | -0.64                 | 0.035   | 0.495           |
| Prss1                      | NM_053243                  | ref Mus musculus protease, serine, 1 (trypsin 1) (Prss1), mRNA [NM_053243]                                                                            | -0.64                 | 0.003   | 0.283           |
| Rpl36a-ps2                 | XM_001475021               | ref PREDICTED: Mus musculus similar to ribosomal protein L36a (LOC100040331), mRNA [XM_001475021]                                                     | -0.64                 | 0.043   | 0.510           |
| 5830411N06Rik              | NM_001128146               | ref Mus musculus RIKEN cDNA 5830411N06 gene (5830411N06Rik), transcript variant 2, mRNA [NM_001128146]                                                | -0.64                 | 0.009   | 0.398           |
| ENSMUST00000108245         | ENSMUST00000108245         | ens solute carrier family 7 (cationic amino acid transporter, y+ system), member 14 Gene [Source:MGI (curated);Acc:MGI:3040688] [ENSMUST00000108245]  | -0.64                 | 0.030   | 0.480           |
| 4933416C03Rik              | NM_001161855               | ref Mus musculus RIKEN cDNA 4933416C03 gene (4933416C03Rik), mRNA [NM_001161855]                                                                      | -0.64                 | 0.013   | 0.412           |
| Fbxw13                     | NM_177598                  | ref Mus musculus F-box and WD-40 domain protein 13 (Fbxw13), mRNA [NM_177598]                                                                         | -0.64                 | 0.023   | 0.455           |
| chr16:17833211-17835112_F  | chr16:17833211-17835112_F  | lincRNA:chr16:17833211-17835112 forward strand                                                                                                        | -0.64                 | 0.002   | 0.259           |
| chr15:79764481-79809909_F  | chr15:79764481-79809909_F  | lincRNA:chr15:79764481-79809909 forward strand                                                                                                        | -0.65                 | 0.041   | 0.506           |
| B020011L13Rik              | XM_488281                  | ref PREDICTED: Mus musculus RIKEN cDNA B020011L13 gene, transcript variant 1 (B020011L13Rik), mRNA [XM_488281]                                        | -0.65                 | 0.040   | 0.504           |
| chr12:85210777-85262127_F  | chr12:85210777-85262127_F  | lincRNA:chr12:85210777-85262127 forward strand                                                                                                        | -0.65                 | 0.031   | 0.482           |



Online Supplemental Table IV: mG4H-STZ Only

| Gene Symbol                       | RefSeq                     | Description                                                                                                                                                 | logFC<br>mG4H-<br>STZ | P-value | Adj.<br>P-value |
|-----------------------------------|----------------------------|-------------------------------------------------------------------------------------------------------------------------------------------------------------|-----------------------|---------|-----------------|
| <b>Olf1264</b>                    | NM_021368                  | ref Mus musculus olfactory receptor 1264 (Olf1264), mRNA [NM_021368]                                                                                        | -0.65                 | 0.036   | 0.495           |
| <b>C130026L21Rik</b>              | NR_015546                  | ref Mus musculus RIKEN cDNA C130026L21 gene (C130026L21Rik), non-coding RNA [NR_015546]                                                                     | -0.65                 | 0.044   | 0.512           |
| <b>Loxhd1</b>                     | NM_172834                  | ref Mus musculus lipoxygenase homology domains 1 (Loxhd1), mRNA [NM_172834]                                                                                 | -0.65                 | 0.011   | 0.406           |
| <b>chr1:141070245-141076841_R</b> | chr1:141070245-141076841_R | lincRNA:chr1:141070245-141076841 reverse strand                                                                                                             | -0.65                 | 0.004   | 0.318           |
| <b>Clca4</b>                      | NM_139148                  | ref Mus musculus chloride channel calcium activated 4 (Clca4), mRNA [NM_139148]                                                                             | -0.65                 | 0.011   | 0.406           |
| <b>Gm10190</b>                    | NR_028385                  | ref Mus musculus predicted gene 10190 (Gm10190), non-coding RNA [NR_028385]                                                                                 | -0.65                 | 0.046   | 0.513           |
| <b>Vmn2r71</b>                    | NM_001105184               | ref Mus musculus vomeronasal 2, receptor 71 (Vmn2r71), mRNA [NM_001105184]                                                                                  | -0.65                 | 0.008   | 0.391           |
| <b>ENSMUST00000087474</b>         | ENSMUST00000087474         | ens Putative uncharacterized protein [Source:UniProtKB/TrEMBL;Acc:Q3ULR8] [ENSMUST00000087474]                                                              | -0.65                 | 0.015   | 0.419           |
| <b>Ebpl</b>                       | NM_026598                  | ref Mus musculus emopamil binding protein-like (Ebpl), mRNA [NM_026598]                                                                                     | -0.65                 | 0.046   | 0.514           |
| <b>ENSMUST00000105252</b>         | ENSMUST00000105252         | ens GLI-Kruppel family member GLI1 Gene [Source:MGI Symbol;Acc:MGI:95727] [ENSMUST00000105252]                                                              | -0.65                 | 0.043   | 0.510           |
| <b>XM_001000740</b>               | XM_001000740               | ref PREDICTED: Mus musculus RIKEN cDNA 4930505N22 gene (4930505N22Rik), mRNA [XM_001000740]                                                                 | -0.65                 | 0.033   | 0.490           |
| <b>chr17:5795893-5835243_F</b>    | chr17:5795893-5835243_F    | lincRNA:chr17:5795893-5835243 forward strand                                                                                                                | -0.66                 | 0.015   | 0.419           |
| <b>Cdkn2a</b>                     | NM_009877                  | ref Mus musculus cyclin-dependent kinase inhibitor 2A (Cdkn2a), transcript variant 1, mRNA [NM_009877]                                                      | -0.66                 | 0.040   | 0.504           |
| <b>Wdfy4</b>                      | NM_001146022               | ref Mus musculus WD repeat and FYVE domain containing 4 (Wdfy4), mRNA [NM_001146022]                                                                        | -0.66                 | 0.008   | 0.391           |
| <b>LOC385536</b>                  | XM_913133                  | ref PREDICTED: Mus musculus similar to putative (LOC385536), mRNA [XM_913133]                                                                               | -0.66                 | 0.012   | 0.408           |
| <b>Gm600</b>                      | ENSMUST00000079469         | ref PREDICTED: Mus musculus gene model 600, (NCBI) (Gm600), mRNA [XM_983339]                                                                                | -0.66                 | 0.020   | 0.447           |
| <b>AK087124</b>                   | AK087124                   | gb Mus musculus 0 day neonate lung cDNA, RIKEN full-length enriched library, clone:E030028L23 product:unclassifiable, full insert sequence. [AK087124]      | -0.66                 | 0.006   | 0.361           |
| <b>Gm5811</b>                     | XM_001474656               | ref PREDICTED: Mus musculus similar to LOC635138 protein (LOC545175), mRNA [XM_001474656]                                                                   | -0.66                 | 0.048   | 0.516           |
| <b>chr5:77239012-77271614_F</b>   | chr5:77239012-77271614_F   | lincRNA:chr5:77239012-77271614 forward strand                                                                                                               | -0.66                 | 0.010   | 0.400           |
| <b>Pramef12</b>                   | NM_029948                  | ref Mus musculus PRAME family member 12 (Pramef12), mRNA [NM_029948]                                                                                        | -0.66                 | 0.022   | 0.452           |
| <b>chr12:13109460-13122709_F</b>  | chr12:13109460-13122709_F  | lincRNA:chr12:13109460-13122709 forward strand                                                                                                              | -0.66                 | 0.008   | 0.391           |
| <b>Vmn2r94</b>                    | NM_001104543               | ref Mus musculus vomeronasal 2, receptor 94 (Vmn2r94), mRNA [NM_001104543]                                                                                  | -0.66                 | 0.014   | 0.415           |
| <b>LOC100044020</b>               | XR_032265                  | ref PREDICTED: Mus musculus similar to H-2 class I histocompatibility antigen, Q7 alpha chain precursor (QA-2 antigen) (LOC100044020), misc RNA [XR_032265] | -0.66                 | 0.032   | 0.485           |
| <b>Ifi203</b>                     | NM_001045481               | ref Mus musculus interferon activated gene 203 (Ifi203), transcript variant 1, mRNA [NM_001045481]                                                          | -0.66                 | 0.018   | 0.437           |
| <b>chr14:52864224-52878449_R</b>  | chr14:52864224-52878449_R  | lincRNA:chr14:52864224-52878449 reverse strand                                                                                                              | -0.66                 | 0.049   | 0.519           |
| <b>Gm6880</b>                     | NM_001099305               | ref Mus musculus predicted gene 6880 (Gm6880), mRNA [NM_001099305]                                                                                          | -0.67                 | 0.013   | 0.412           |
| <b>LOC632209</b>                  | XM_919447                  | ref PREDICTED: Mus musculus hypothetical LOC632209, transcript variant 3 (LOC632209), mRNA [XM_919447]                                                      | -0.67                 | 0.024   | 0.461           |
| <b>chr5:15176325-15223375_R</b>   | chr5:15176325-15223375_R   | lincRNA:chr5:15176325-15223375 reverse strand                                                                                                               | -0.67                 | 0.031   | 0.480           |

Online Supplemental Table IV: mG4H-STZ Only

| Gene Symbol                 | RefSeq                      | Description                                                                                                               | logFC<br>mG4H-<br>STZ | P-value | Adj.<br>P-value |
|-----------------------------|-----------------------------|---------------------------------------------------------------------------------------------------------------------------|-----------------------|---------|-----------------|
| chr13:98571741-98603323_F   | chr13:98571741-98603323_F   | lincRNA:chr13:98571741-98603323 forward strand                                                                            | -0.67                 | 0.010   | 0.400           |
| chr12:89448550-89461843_R   | chr12:89448550-89461843_R   | lincRNA:chr12:89448550-89461843 reverse strand                                                                            | -0.67                 | 0.006   | 0.369           |
| ENSMUST00000061517          | ENSMUST00000061517          | ens RIKEN cDNA D830044D21 gene Gene [Source:MGI Symbol;Acc:MGI:2444378] [ENSMUST00000061517]                              | -0.67                 | 0.018   | 0.435           |
| chr5:74489084-74491430_F    | chr5:74489084-74491430_F    | lincRNA:chr5:74489084-74491430 forward strand                                                                             | -0.67                 | 0.007   | 0.381           |
| chr8:126396600-126407275_R  | chr8:126396600-126407275_R  | lincRNA:chr8:126396600-126407275 reverse strand                                                                           | -0.67                 | 0.037   | 0.497           |
| chr14:28231577-28242027_R   | chr14:28231577-28242027_R   | lincRNA:chr14:28231577-28242027 reverse strand                                                                            | -0.67                 | 0.025   | 0.464           |
| chr6:120613889-120648725_R  | chr6:120613889-120648725_R  | lincRNA:chr6:120613889-120648725 reverse strand                                                                           | -0.67                 | 0.032   | 0.485           |
| Cenpm                       | NM_178269                   | ref Mus musculus centromere protein M (Cenpm), transcript variant 2, mRNA [NM_178269]                                     | -0.68                 | 0.008   | 0.391           |
| chr14:106068373-106146613_R | chr14:106068373-106146613_R | lincRNA:chr14:106068373-106146613 reverse strand                                                                          | -0.68                 | 0.009   | 0.393           |
| Atcay                       | NM_178662                   | ref Mus musculus ataxia, cerebellar, Cayman type homolog (human) (Atcay), mRNA [NM_178662]                                | -0.68                 | 0.001   | 0.197           |
| Il1f6                       | NM_019450                   | ref Mus musculus interleukin 1 family, member 6 (Il1f6), mRNA [NM_019450]                                                 | -0.68                 | 0.016   | 0.428           |
| Spats1                      | NM_027649                   | ref Mus musculus spermatogenesis associated, serine-rich 1 (Spats1), mRNA [NM_027649]                                     | -0.68                 | 0.011   | 0.407           |
| Arsi                        | NM_001038499                | ref Mus musculus arylsulfatase i (Arsi), mRNA [NM_001038499]                                                              | -0.68                 | 0.005   | 0.338           |
| Gm3788                      | XM_001474769                | ref PREDICTED: Mus musculus hypothetical protein LOC100045828 (LOC100045828), mRNA [XM_001474769]                         | -0.68                 | 0.029   | 0.477           |
| Gm318                       | XM_619462                   | ref PREDICTED: Mus musculus gene model 318, (NCBI) (Gm318), mRNA [XM_619462]                                              | -0.68                 | 0.046   | 0.514           |
| chr4:3169583-3180017_F      | chr4:3169583-3180017_F      | lincRNA:chr4:3169583-3180017 forward strand                                                                               | -0.68                 | 0.040   | 0.504           |
| Grk1                        | NM_011881                   | ref Mus musculus G protein-coupled receptor kinase 1 (Grk1), mRNA [NM_011881]                                             | -0.68                 | 0.024   | 0.459           |
| Lipk                        | NM_172837                   | ref Mus musculus lipase, family member K (Lipk), mRNA [NM_172837]                                                         | -0.68                 | 0.002   | 0.281           |
| chr4:63736566-63744848_R    | chr4:63736566-63744848_R    | lincRNA:chr4:63736566-63744848 reverse strand                                                                             | -0.68                 | 0.026   | 0.469           |
| Olfir728                    | NM_001011809                | ref Mus musculus olfactory receptor 728 (Olfir728), mRNA [NM_001011809]                                                   | -0.68                 | 0.008   | 0.391           |
| Olfir776                    | NM_207559                   | ref Mus musculus olfactory receptor 776 (Olfir776), mRNA [NM_207559]                                                      | -0.69                 | 0.021   | 0.448           |
| Vmn2r28                     | NM_001081405                | ref Mus musculus vomeronasal 2, receptor 28 (Vmn2r28), mRNA [NM_001081405]                                                | -0.69                 | 0.049   | 0.519           |
| LOC100047516                | XM_001478504                | ref PREDICTED: Mus musculus similar to casein kinase 1, gamma 3, transcript variant 1 (LOC100047516), mRNA [XM_001478504] | -0.69                 | 0.010   | 0.405           |
| Reg3g                       | NM_011260                   | ref Mus musculus regenerating islet-derived 3 gamma (Reg3g), mRNA [NM_011260]                                             | -0.70                 | 0.013   | 0.412           |
| chr9:30805020-30810645_R    | chr9:30805020-30810645_R    | lincRNA:chr9:30805020-30810645 reverse strand                                                                             | -0.70                 | 0.040   | 0.501           |
| 6530401D17Rik               | NM_029541                   | ref Mus musculus RIKEN cDNA 6530401D17 gene (6530401D17Rik), mRNA [NM_029541]                                             | -0.70                 | 0.042   | 0.507           |
| Cd109                       | NM_153098                   | ref Mus musculus CD109 antigen (Cd109), mRNA [NM_153098]                                                                  | -0.70                 | 0.026   | 0.471           |
| Hoxd10                      | NM_013554                   | ref Mus musculus homeobox D10 (Hoxd10), mRNA [NM_013554]                                                                  | -0.70                 | 0.027   | 0.471           |
| Col5a3                      | NM_016919                   | ref Mus musculus collagen, type V, alpha 3 (Col5a3), mRNA [NM_016919]                                                     | -0.70                 | 0.030   | 0.478           |
| chr10:92798725-92811622_F   | chr10:92798725-92811622_F   | lincRNA:chr10:92798725-92811622 forward strand                                                                            | -0.70                 | 0.032   | 0.484           |

Online Supplemental Table IV: mG4H-STZ Only

| Gene Symbol                | RefSeq                     | Description                                                                                                                                                    | logFC<br>mG4H-<br>STZ | P-value | Adj.<br>P-value |
|----------------------------|----------------------------|----------------------------------------------------------------------------------------------------------------------------------------------------------------|-----------------------|---------|-----------------|
| Gm7225                     | XM_001001994               | ref PREDICTED: Mus musculus predicted gene, EG637939 (EG637939), mRNA [XM_001001994]                                                                           | -0.70                 | 0.017   | 0.435           |
| chr19:46419916-46421753_F  | chr19:46419916-46421753_F  | lincRNA:chr19:46419916-46421753 forward strand                                                                                                                 | -0.70                 | 0.006   | 0.369           |
| Gm5595                     | NM_001008427               | ref Mus musculus predicted gene 5595 (Gm5595), mRNA [NM_001008427]                                                                                             | -0.70                 | 0.022   | 0.451           |
| Krtap20-2                  | NM_001163615               | ref Mus musculus keratin associated protein 20-2 (Krtap20-2), mRNA [NM_001163615]                                                                              | -0.70                 | 0.002   | 0.262           |
| TC1660977                  | TC1660977                  | tc Q7T354_BRARE (Q7T354) Zgc:64095, partial (6%) [TC1660977]                                                                                                   | -0.70                 | 0.005   | 0.338           |
| Vmn2r66                    | NM_001033878               | ref Mus musculus vomeronasal 2, receptor 66 (Vmn2r66), mRNA [NM_001033878]                                                                                     | -0.70                 | 0.030   | 0.477           |
| D15Ert55e                  | C77618                     | gb C77618 Mouse 3.5-dpc blastocyst cDNA Mus musculus cDNA clone J0034F04 3'. [C77618]                                                                          | -0.70                 | 0.028   | 0.475           |
| Btn2a2                     | NM_175938                  | ref Mus musculus butyrophilin, subfamily 2, member A2 (Btn2a2), mRNA [NM_175938]                                                                               | -0.70                 | 0.031   | 0.480           |
| 2610002D18Rik              | NM_001081099               | ref Mus musculus RIKEN cDNA 2610002D18 gene (2610002D18Rik), mRNA [NM_001081099]                                                                               | -0.70                 | 0.046   | 0.513           |
| Gja6                       | NM_001001496               | ref Mus musculus gap junction protein, alpha 6 (Gja6), mRNA [NM_001001496]                                                                                     | -0.70                 | 0.007   | 0.382           |
| LOC100044949               | XR_031188                  | ref PREDICTED: Mus musculus similar to teneurin-2 (LOC100044949), misc RNA [XR_031188]                                                                         | -0.71                 | 0.013   | 0.412           |
| chr9:46894029-46973977_R   | chr9:46894029-46973977_R   | lincRNA:chr9:46894029-46973977 reverse strand                                                                                                                  | -0.71                 | 0.014   | 0.414           |
| Pbp2                       | NM_029595                  | ref Mus musculus phosphatidylethanolamine binding protein 2 (Pbp2), mRNA [NM_029595]                                                                           | -0.71                 | 0.016   | 0.426           |
| XM_985627                  | XM_985627                  | ref PREDICTED: Mus musculus hypothetical LOC675853 (LOC675853), mRNA [XM_985627]                                                                               | -0.71                 | 0.043   | 0.510           |
| Gm3716                     | XM_001478025               | ref PREDICTED: Mus musculus hypothetical protein LOC100047135 (LOC100047135), mRNA [XM_001478025]                                                              | -0.71                 | 0.026   | 0.468           |
| Gm5279                     | XR_032257                  | ref PREDICTED: Mus musculus similar to stratifin (LOC383901), misc RNA [XR_032257]                                                                             | -0.71                 | 0.018   | 0.435           |
| chr17:13220550-13236900_R  | chr17:13220550-13236900_R  | lincRNA:chr17:13220550-13236900 reverse strand                                                                                                                 | -0.71                 | 0.028   | 0.476           |
| chr10:69667411-69678033_F  | chr10:69667411-69678033_F  | lincRNA:chr10:69667411-69678033 forward strand                                                                                                                 | -0.71                 | 0.035   | 0.495           |
| 4732463B04Rik              | AK132490                   | gb Mus musculus 10 days neonate skin cDNA, RIKEN full-length enriched library, clone:4732463B04 product:hypothetical protein, full insert sequence. [AK132490] | -0.72                 | 0.048   | 0.516           |
| chr1:81854900-81906900_F   | chr1:81854900-81906900_F   | lincRNA:chr1:81854900-81906900 forward strand                                                                                                                  | -0.72                 | 0.006   | 0.369           |
| chr6:67155508-67216941_F   | chr6:67155508-67216941_F   | lincRNA:chr6:67155508-67216941 forward strand                                                                                                                  | -0.72                 | 0.011   | 0.407           |
| chr12:82495575-82516300_R  | chr12:82495575-82516300_R  | lincRNA:chr12:82495575-82516300 reverse strand                                                                                                                 | -0.72                 | 0.005   | 0.340           |
| LOC674595                  | XM_975798                  | ref PREDICTED: Mus musculus similar to heterogeneous nuclear ribonucleoprotein A3 (LOC674595), mRNA [XM_975798]                                                | -0.72                 | 0.021   | 0.449           |
| Btnl2                      | NM_079835                  | ref Mus musculus butyrophilin-like 2 (Btnl2), mRNA [NM_079835]                                                                                                 | -0.73                 | 0.034   | 0.491           |
| chrX:120590872-120598071_R | chrX:120590872-120598071_R | lincRNA:chrX:120590872-120598071 reverse strand                                                                                                                | -0.73                 | 0.003   | 0.282           |
| chr10:94848446-94874121_F  | chr10:94848446-94874121_F  | lincRNA:chr10:94848446-94874121 forward strand                                                                                                                 | -0.73                 | 0.003   | 0.282           |
| chr17:26911397-26917047_R  | chr17:26911397-26917047_R  | lincRNA:chr17:26911397-26917047 reverse strand                                                                                                                 | -0.73                 | 0.046   | 0.514           |
| Grem1                      | NM_011824                  | ref Mus musculus gremlin 1 (Grem1), mRNA [NM_011824]                                                                                                           | -0.73                 | 0.042   | 0.508           |
| chr1:57410074-57426723_F   | chr1:57410074-57426723_F   | lincRNA:chr1:57410074-57426723 forward strand                                                                                                                  | -0.73                 | 0.045   | 0.513           |
| chrX:7626297-7636950_F     | chrX:7626297-7636950_F     | lincRNA:chrX:7626297-7636950 forward strand                                                                                                                    | -0.73                 | 0.014   | 0.412           |

Online Supplemental Table IV: mG4H-STZ Only

| Gene Symbol                 | RefSeq                      | Description                                                                                                                                                             | logFC<br>mG4H-<br>STZ | P-value | Adj.<br>P-value |
|-----------------------------|-----------------------------|-------------------------------------------------------------------------------------------------------------------------------------------------------------------------|-----------------------|---------|-----------------|
| Ido1                        | NM_008324                   | ref Mus musculus indoleamine 2,3-dioxygenase 1 (Ido1), mRNA [NM_008324]                                                                                                 | -0.73                 | 0.016   | 0.425           |
| Tmem26                      | NM_177794                   | ref Mus musculus transmembrane protein 26 (Tmem26), mRNA [NM_177794]                                                                                                    | -0.74                 | 0.019   | 0.439           |
| chr12:12768528-12849976_R   | chr12:12768528-12849976_R   | lincRNA:chr12:12768528-12849976 reverse strand                                                                                                                          | -0.74                 | 0.003   | 0.303           |
| chr3:86961614-86966377_F    | chr3:86961614-86966377_F    | lincRNA:chr3:86961614-86966377 forward strand                                                                                                                           | -0.74                 | 0.012   | 0.410           |
| Barhl1                      | NM_019446                   | ref Mus musculus BarH-like 1 (Drosophila) (Barhl1), transcript variant 1, mRNA [NM_019446]                                                                              | -0.74                 | 0.008   | 0.392           |
| XM_001479606                | XM_001479606                | ref PREDICTED: Mus musculus hypothetical protein LOC100048194 (LOC100048194), mRNA [XM_001479606]                                                                       | -0.74                 | 0.045   | 0.513           |
| ENSMUST00000100923          | ENSMUST00000100923          | ens RIKEN cDNA 9230020A06 gene Gene [Source:MGI Symbol;Acc:MGI:3588244] [ENSMUST00000100923]                                                                            | -0.74                 | 0.002   | 0.248           |
| Syn3                        | NM_001164495                | ref Mus musculus synapsin III (Syn3), transcript variant 2, mRNA [NM_001164495]                                                                                         | -0.74                 | 0.026   | 0.470           |
| chr10:39659425-39674200_R   | chr10:39659425-39674200_R   | lincRNA:chr10:39659425-39674200 reverse strand                                                                                                                          | -0.75                 | 0.037   | 0.496           |
| Zfp831                      | NM_001099328                | ref Mus musculus zinc finger protein 831 (Zfp831), mRNA [NM_001099328]                                                                                                  | -0.75                 | 0.021   | 0.448           |
| chr10:118385588-118439338_F | chr10:118385588-118439338_F | lincRNA:chr10:118385588-118439338 forward strand                                                                                                                        | -0.75                 | 0.007   | 0.374           |
| D630045M09Rik               | AK131952                    | gb Mus musculus ES cells cDNA, RIKEN full-length enriched library, clone:2410071D21 product:similar to LRRGT00034 [Rattus norvegicus], full insert sequence. [AK131952] | -0.75                 | 0.006   | 0.361           |
| chr7:105964846-105965163_F  | chr7:105964846-105965163_F  | lincRNA:chr7:105964846-105965163 forward strand                                                                                                                         | -0.75                 | 0.038   | 0.499           |
| Veph1                       | NM_145820                   | ref Mus musculus ventricular zone expressed PH domain homolog 1 (zebrafish) (Veph1), transcript variant Veph-A, mRNA [NM_145820]                                        | -0.76                 | 0.019   | 0.437           |
| chr2:94008913-94019798_F    | chr2:94008913-94019798_F    | lincRNA:chr2:94008913-94019798 forward strand                                                                                                                           | -0.76                 | 0.003   | 0.305           |
| Pr16a1                      | NM_011166                   | ref Mus musculus prolactin family 6, subfamily a, member 1 (Pr16a1), mRNA [NM_011166]                                                                                   | -0.76                 | 0.011   | 0.406           |
| Gm821                       | XM_287066                   | ref PREDICTED: Mus musculus gene model 821, (NCBI) (Gm821), mRNA [XM_287066]                                                                                            | -0.77                 | 0.026   | 0.471           |
| Gm12346                     | BG864327                    | gb 602797395F1 NCI_CGAP_Mam4 Mus musculus cDNA clone IMAGE:4918487 5', mRNA sequence [BG864327]                                                                         | -0.77                 | 0.011   | 0.406           |
| chr1:36095790-36096193_R    | chr1:36095790-36096193_R    | lincRNA:chr1:36095790-36096193 reverse strand                                                                                                                           | -0.77                 | 0.004   | 0.324           |
| Gm9997                      | ENSMUST00000070468          | ens Putative uncharacterized protein Fragment [Source:UniProtKB/TrEMBL;Acc:Q8C8Z0] [ENSMUST00000070468]                                                                 | -0.77                 | 0.006   | 0.358           |
| LOC100044496                | XM_001472432                | ref PREDICTED: Mus musculus similar to eukaryotic translation elongation factor 1 alpha 1-like 14 (LOC100044496), mRNA [XM_001472432]                                   | -0.77                 | 0.009   | 0.398           |
| Pigb                        | NM_018889                   | ref Mus musculus phosphatidylinositol glycan anchor biosynthesis, class B (Pigb), mRNA [NM_018889]                                                                      | -0.77                 | 0.012   | 0.412           |
| Gatm                        | NM_025961                   | ref Mus musculus glycine amidinotransferase (L-arginine:glycine amidinotransferase) (Gatm), nuclear gene encoding mitochondrial protein, mRNA [NM_025961]               | -0.78                 | 0.019   | 0.437           |
| Gm8640                      | XM_001002194                | ref PREDICTED: Mus musculus predicted gene, EG667450 (EG667450), mRNA [XM_001002194]                                                                                    | -0.78                 | 0.021   | 0.447           |
| Lrrc34                      | NM_027941                   | ref Mus musculus leucine rich repeat containing 34 (Lrrc34), mRNA [NM_027941]                                                                                           | -0.78                 | 0.012   | 0.412           |
| 9530059O14Rik               | NR_015610                   | ref Mus musculus RIKEN cDNA 9530059O14 gene (9530059O14Rik), non-coding RNA [NR_015610]                                                                                 | -0.78                 | 0.003   | 0.293           |
| Olf1323                     | NM_146390                   | ref Mus musculus olfactory receptor 1323 (Olf1323), mRNA [NM_146390]                                                                                                    | -0.78                 | 0.023   | 0.456           |

Online Supplemental Table IV: mG4H-STZ Only

| Gene Symbol                 | RefSeq                      | Description                                                                                                                         | logFC<br>mG4H-<br>STZ | P-value | Adj.<br>P-value |
|-----------------------------|-----------------------------|-------------------------------------------------------------------------------------------------------------------------------------|-----------------------|---------|-----------------|
| chr12:21380896-21387071_F   | chr12:21380896-21387071_F   | lincRNA:chr12:21380896-21387071 forward strand                                                                                      | -0.78                 | 0.009   | 0.398           |
| Olf1454                     | NM_146692                   | ref Mus musculus olfactory receptor 1454 (Olf1454), mRNA [NM_146692]                                                                | -0.78                 | 0.010   | 0.403           |
| Gm6289                      | NM_001039222                | ref Mus musculus predicted gene 6289 (Gm6289), mRNA [NM_001039222]                                                                  | -0.78                 | 0.005   | 0.341           |
| Pbsn                        | NM_017471                   | ref Mus musculus probasin (Pbsn), mRNA [NM_017471]                                                                                  | -0.79                 | 0.048   | 0.518           |
| Ano5                        | NM_177694                   | ref Mus musculus anoctamin 5 (Ano5), mRNA [NM_177694]                                                                               | -0.79                 | 0.008   | 0.393           |
| chr3:41143423-41359623_F    | chr3:41143423-41359623_F    | lincRNA:chr3:41143423-41359623 forward strand                                                                                       | -0.79                 | 0.022   | 0.452           |
| LOC100045638                | XM_001474652                | ref PREDICTED: Mus musculus hypothetical protein LOC100045638 (LOC100045638), mRNA [XM_001474652]                                   | -0.80                 | 0.046   | 0.513           |
| Klra7                       | NM_001110323                | ref Mus musculus killer cell lectin-like receptor, subfamily A, member 7 (Klra7), transcript variant 1, mRNA [NM_001110323]         | -0.80                 | 0.003   | 0.303           |
| Olf495                      | NM_146364                   | ref Mus musculus olfactory receptor 495 (Olf495), mRNA [NM_146364]                                                                  | -0.80                 | 0.049   | 0.519           |
| Gm16529                     | XM_001472504                | ref PREDICTED: Mus musculus hypothetical protein LOC100039235 (LOC100039235), mRNA [XM_001472504]                                   | -0.80                 | 0.015   | 0.419           |
| Olf705                      | NM_147032                   | ref Mus musculus olfactory receptor 705 (Olf705), mRNA [NM_147032]                                                                  | -0.81                 | 0.020   | 0.447           |
| Mup9                        | NM_001126319                | ref Mus musculus major urinary protein 9 (Mup9), mRNA [NM_001126319]                                                                | -0.81                 | 0.047   | 0.514           |
| LOC100044390                | XM_001472264                | ref PREDICTED: Mus musculus similar to spermatogenesis associated glutamate (E)-rich protein 4d (LOC100044390), mRNA [XM_001472264] | -0.81                 | 0.023   | 0.454           |
| chr6:112552041-112560067_R  | chr6:112552041-112560067_R  | lincRNA:chr6:112552041-112560067 reverse strand                                                                                     | -0.81                 | 0.005   | 0.353           |
| chr6:140557582-140557917_F  | chr6:140557582-140557917_F  | lincRNA:chr6:140557582-140557917 forward strand                                                                                     | -0.81                 | 0.021   | 0.449           |
| Gm4794                      | NM_001101452                | ref Mus musculus predicted gene 4794 (Gm4794), mRNA [NM_001101452]                                                                  | -0.81                 | 0.004   | 0.329           |
| Diras2                      | NM_001024474                | ref Mus musculus DIRAS family, GTP-binding RAS-like 2 (Diras2), mRNA [NM_001024474]                                                 | -0.81                 | 0.024   | 0.457           |
| Fam163a                     | NM_177838                   | ref Mus musculus family with sequence similarity 163, member A (Fam163a), mRNA [NM_177838]                                          | -0.81                 | 0.033   | 0.490           |
| Gm13959                     | XM_001478172                | ref PREDICTED: Mus musculus similar to T-cell receptor alpha chain (LOC382180), mRNA [XM_001478172]                                 | -0.81                 | 0.023   | 0.456           |
| chr16:64758224-64765700_F   | chr16:64758224-64765700_F   | lincRNA:chr16:64758224-64765700 forward strand                                                                                      | -0.82                 | 0.043   | 0.510           |
| 1700018L24Rik               | NM_029326                   | ref Mus musculus RIKEN cDNA 1700018L24 gene (1700018L24Rik), mRNA [NM_029326]                                                       | -0.82                 | 0.009   | 0.393           |
| Fcrla                       | NM_145141                   | ref Mus musculus Fc receptor-like A (Fcrla), transcript variant 2, mRNA [NM_145141]                                                 | -0.82                 | 0.024   | 0.459           |
| Car5a                       | NM_007608                   | ref Mus musculus carbonic anhydrase 5a, mitochondrial (Car5a), nuclear gene encoding mitochondrial protein, mRNA [NM_007608]        | -0.83                 | 0.002   | 0.281           |
| Gm5282                      | XM_357327                   | ref PREDICTED: Mus musculus predicted gene, EG383925 (EG383925), mRNA [XM_357327]                                                   | -0.83                 | 0.017   | 0.429           |
| chr12:115365529-115379374_R | chr12:115365529-115379374_R | lincRNA:chr12:115365529-115379374 reverse strand                                                                                    | -0.83                 | 0.013   | 0.412           |
| chr1:160888257-160910594_R  | chr1:160888257-160910594_R  | lincRNA:chr1:160888257-160910594 reverse strand                                                                                     | -0.83                 | 0.037   | 0.497           |
| chr3:148884650-148888709_R  | chr3:148884650-148888709_R  | lincRNA:chr3:148884650-148888709 reverse strand                                                                                     | -0.83                 | 0.006   | 0.369           |
| chr19:61226425-61270975_F   | chr19:61226425-61270975_F   | lincRNA:chr19:61226425-61270975 forward strand                                                                                      | -0.83                 | 0.010   | 0.401           |
| chr5:74340084-74346709_F    | chr5:74340084-74346709_F    | lincRNA:chr5:74340084-74346709 forward strand                                                                                       | -0.83                 | 0.008   | 0.392           |



Online Supplemental Table IV: mG4H-STZ Only

| Gene Symbol                 | RefSeq                      | Description                                                                                              | logFC<br>mG4H-<br>STZ | P-value | Adj.<br>P-value |
|-----------------------------|-----------------------------|----------------------------------------------------------------------------------------------------------|-----------------------|---------|-----------------|
| ENSMUST00000032506          | ENSMUST00000032506          | ens RIKEN cDNA 4933413G19 gene Gene [Source:MGI Symbol;Acc:MGI:1918399] [ENSMUST00000032506]             | -0.83                 | 0.006   | 0.361           |
| chr4:128727332-128735227_F  | chr4:128727332-128735227_F  | lincRNA:chr4:128727332-128735227 forward strand                                                          | -0.84                 | 0.019   | 0.441           |
| chr9:41368823-41369514_F    | chr9:41368823-41369514_F    | lincRNA:chr9:41368823-41369514 forward strand                                                            | -0.84                 | 0.006   | 0.366           |
| chr10:5950116-5958250_F     | chr10:5950116-5958250_F     | lincRNA:chr10:5950116-5958250 forward strand                                                             | -0.84                 | 0.004   | 0.326           |
| Olf624                      | NM_001011865                | ref Mus musculus olfactory receptor 624 (Olf624), mRNA [NM_001011865]                                    | -0.84                 | 0.041   | 0.505           |
| LOC100044879                | XM_001473246                | ref PREDICTED: Mus musculus similar to histocompatibility antigen 60 (LOC100044879), mRNA [XM_001473246] | -0.84                 | 0.035   | 0.493           |
| Crisp1                      | NM_009638                   | ref Mus musculus cysteine-rich secretory protein 1 (Crisp1), mRNA [NM_009638]                            | -0.85                 | 0.002   | 0.281           |
| chrX:31867450-32124664_F    | chrX:31867450-32124664_F    | lincRNA:chrX:31867450-32124664 forward strand                                                            | -0.85                 | 0.001   | 0.214           |
| Rab6b                       | NM_173781                   | ref Mus musculus RAB6B, member RAS oncogene family (Rab6b), mRNA [NM_173781]                             | -0.85                 | 0.036   | 0.496           |
| Gm13793                     | XM_001479764                | ref PREDICTED: Mus musculus hypothetical protein LOC100048373 (LOC100048373), mRNA [XM_001479764]        | -0.86                 | 0.025   | 0.463           |
| ENSMUST00000057096          | ENSMUST00000057096          | ens RIKEN cDNA A430090L17 gene Gene [Source:MGI Symbol;Acc:MGI:2442754] [ENSMUST00000057096]             | -0.86                 | 0.021   | 0.450           |
| Senp8                       | NM_001172068                | ref Mus musculus SUMO/sentrin specific peptidase 8 (Senp8), transcript variant 1, mRNA [NM_001172068]    | -0.86                 | 0.044   | 0.511           |
| Scnn1g                      | NM_011326                   | ref Mus musculus sodium channel, nonvoltage-gated 1 gamma (Scnn1g), mRNA [NM_011326]                     | -0.87                 | 0.011   | 0.407           |
| Chrna3                      | NM_145129                   | ref Mus musculus cholinergic receptor, nicotinic, alpha polypeptide 3 (Chma3), mRNA [NM_145129]          | -0.87                 | 0.045   | 0.513           |
| chr7:99879368-99889978_F    | chr7:99879368-99889978_F    | lincRNA:chr7:99879368-99889978 forward strand                                                            | -0.87                 | 0.035   | 0.493           |
| LOC100046308                | XM_001475990                | ref PREDICTED: Mus musculus similar to H2A-Bbd (LOC100046308), mRNA [XM_001475990]                       | -0.87                 | 0.039   | 0.500           |
| chr9:122481619-122588714_F  | chr9:122481619-122588714_F  | lincRNA:chr9:122481619-122588714 forward strand                                                          | -0.88                 | 0.016   | 0.426           |
| Vmn1r19                     | NM_134182                   | ref Mus musculus vomeronasal 1 receptor 19 (Vmn1r19), mRNA [NM_134182]                                   | -0.88                 | 0.035   | 0.495           |
| Aif1                        | NM_019467                   | ref Mus musculus allograft inflammatory factor 1 (Aif1), mRNA [NM_019467]                                | -0.88                 | 0.046   | 0.513           |
| Olf155                      | NM_019473                   | ref Mus musculus olfactory receptor 155 (Olf155), mRNA [NM_019473]                                       | -0.88                 | 0.014   | 0.412           |
| 4930429D17Rik               | XM_001474971                | ref PREDICTED: Mus musculus RIKEN cDNA 4930429D17 gene (4930429D17Rik), mRNA [XM_001474971]              | -0.88                 | 0.005   | 0.341           |
| ENSMUST00000103598          | ENSMUST00000103598          | ens predicted gene 6037 Gene [Source:MGI Symbol;Acc:MGI:3649172] [ENSMUST00000103598]                    | -0.89                 | 0.039   | 0.500           |
| chr6:47917337-47917697_R    | chr6:47917337-47917697_R    | lincRNA:chr6:47917337-47917697 reverse strand                                                            | -0.89                 | 0.018   | 0.435           |
| chr12:110003268-110030953_F | chr12:110003268-110030953_F | lincRNA:chr12:110003268-110030953 forward strand                                                         | -0.89                 | 0.025   | 0.466           |
| Gabra4                      | NM_010251                   | ref Mus musculus gamma-aminobutyric acid (GABA) A receptor, subunit alpha 4 (Gabra4), mRNA [NM_010251]   | -0.89                 | 0.010   | 0.401           |
| chr7:108246261-108247836_F  | chr7:108246261-108247836_F  | lincRNA:chr7:108246261-108247836 forward strand                                                          | -0.90                 | 0.007   | 0.374           |
| chr13:59969950-59989725_R   | chr13:59969950-59989725_R   | lincRNA:chr13:59969950-59989725 reverse strand                                                           | -0.90                 | 0.036   | 0.495           |
| Tas2r114                    | NM_207019                   | ref Mus musculus taste receptor, type 2, member 114 (Tas2r114), mRNA [NM_207019]                         | -0.90                 | 0.045   | 0.513           |
| Ttc39a                      | NM_153392                   | ref Mus musculus tetratricopeptide repeat domain 39A (Ttc39a), transcript variant 2, mRNA [NM_153392]    | -0.91                 | 0.012   | 0.409           |



Online Supplemental Table IV: mG4H-STZ Only

| Gene Symbol                | RefSeq                     | Description                                                                                                              | logFC<br>mG4H-<br>STZ | P-value | Adj.<br>P-value |
|----------------------------|----------------------------|--------------------------------------------------------------------------------------------------------------------------|-----------------------|---------|-----------------|
| Gm13815                    | XR_034204                  | ref PREDICTED: Mus musculus similar to ribosomal protein S27a (LOC100043205), misc RNA [XR_034204]                       | -0.92                 | 0.024   | 0.458           |
| Vmn1r15                    | NM_053236                  | ref Mus musculus vomeronasal 1 receptor 15 (Vmn1r15), mRNA [NM_053236]                                                   | -0.92                 | 0.011   | 0.406           |
| Fezf1                      | NM_028462                  | ref Mus musculus Fez family zinc finger 1 (Fezf1), mRNA [NM_028462]                                                      | -0.92                 | 0.030   | 0.477           |
| H2-DMb1                    | NM_010387                  | ref Mus musculus histocompatibility 2, class II, locus Mb1 (H2-DMb1), mRNA [NM_010387]                                   | -0.93                 | 0.012   | 0.412           |
| Olfir340                   | NM_146951                  | ref Mus musculus olfactory receptor 340 (Olfir340), mRNA [NM_146951]                                                     | -0.93                 | 0.003   | 0.303           |
| 4930549C01Rik              | NM_026300                  | ref Mus musculus RIKEN cDNA 4930549C01 gene (4930549C01Rik), mRNA [NM_026300]                                            | -0.93                 | 0.011   | 0.407           |
| chr2:150217425-150266600_F | chr2:150217425-150266600_F | lincRNA:chr2:150217425-150266600 forward strand                                                                          | -0.94                 | 0.011   | 0.407           |
| 1810046K07Rik              | NM_027217                  | ref Mus musculus RIKEN cDNA 1810046K07 gene (1810046K07Rik), mRNA [NM_027217]                                            | -0.94                 | 0.012   | 0.409           |
| ENSMUST0000012231          | ENSMUST0000012231          | ens RUN and FYVE domain-containing 2 Gene [Source:MGI (curated);Acc:MGI:1917682] [ENSMUST0000012231]                     | -0.96                 | 0.005   | 0.341           |
| chr12:72103832-72116875_R  | chr12:72103832-72116875_R  | lincRNA:chr12:72103832-72116875 reverse strand                                                                           | -0.97                 | 0.008   | 0.391           |
| Mrgpra5                    | NM_207534                  | ref Mus musculus MAS-related GPR, member A5 (Mrgpra5), mRNA [NM_207534]                                                  | -0.98                 | 0.012   | 0.409           |
| Fam70b                     | NM_001143671               | ref Mus musculus family with sequence similarity 70, member B (Fam70b), transcript variant 1, mRNA [NM_001143671]        | -0.98                 | 0.041   | 0.506           |
| Ptpn2                      | NM_011215                  | ref Mus musculus protein tyrosine phosphatase, receptor type, N polypeptide 2 (Ptpn2), mRNA [NM_011215]                  | -0.98                 | 0.002   | 0.257           |
| chr15:79764481-79809909_R  | chr15:79764481-79809909_R  | lincRNA:chr15:79764481-79809909 reverse strand                                                                           | -0.99                 | 0.017   | 0.429           |
| LOC100048469               | XM_001480313               | ref PREDICTED: Mus musculus similar to T cell receptor alpha chain AV10S10 (LOC100048469), mRNA [XM_001480313]           | -0.99                 | 0.018   | 0.435           |
| chr5:79845827-79846360_R   | chr5:79845827-79846360_R   | lincRNA:chr5:79845827-79846360 reverse strand                                                                            | -0.99                 | 0.016   | 0.428           |
| chr5:22810359-22836386_F   | chr5:22810359-22836386_F   | lincRNA:chr5:22810359-22836386 forward strand                                                                            | -1.00                 | 0.002   | 0.262           |
| ENSMUST00000097635         | ENSMUST00000097635         | ens Putative uncharacterized protein [Source:UniProtKB/TrEMBL;Acc:Q3UNV9] [ENSMUST00000097635]                           | -1.00                 | 0.003   | 0.305           |
| chr3:38324807-38342556_R   | chr3:38324807-38342556_R   | lincRNA:chr3:38324807-38342556 reverse strand                                                                            | -1.01                 | 0.028   | 0.476           |
| Vmn1r13                    | NM_053235                  | ref Mus musculus vomeronasal 1 receptor 13 (Vmn1r13), mRNA [NM_053235]                                                   | -1.02                 | 0.021   | 0.449           |
| LOC637093                  | XM_912681                  | ref PREDICTED: Mus musculus hypothetical LOC637093 (LOC637093), mRNA [XM_912681]                                         | -1.03                 | 0.011   | 0.407           |
| Zfp541                     | NM_001099277               | ref Mus musculus zinc finger protein 541 (Zfp541), mRNA [NM_001099277]                                                   | -1.06                 | 0.045   | 0.513           |
| chr7:31993375-31999171_F   | chr7:31993375-31999171_F   | lincRNA:chr7:31993375-31999171 forward strand                                                                            | -1.06                 | 0.002   | 0.262           |
| BC061237                   | NM_198677                  | ref Mus musculus cDNA sequence BC061237 (BC061237), mRNA [NM_198677]                                                     | -1.08                 | 0.038   | 0.499           |
| LOC100048060               | XR_034197                  | ref PREDICTED: Mus musculus similar to tripartite motif protein TRIM12 (LOC100048060), misc RNA [XR_034197]              | -1.08                 | 0.005   | 0.354           |
| chr4:8566129-8568514_R     | chr4:8566129-8568514_R     | lincRNA:chr4:8566129-8568514 reverse strand                                                                              | -1.09                 | 0.002   | 0.279           |
| Stau1                      | NM_001109906               | ref Mus musculus staufer (RNA binding protein) homolog 1 (Drosophila) (Stau1), transcript variant 1, mRNA [NM_001109906] | -1.10                 | 0.005   | 0.339           |
| Olfir196                   | NM_146779                  | ref Mus musculus olfactory receptor 196 (Olfir196), mRNA [NM_146779]                                                     | -1.11                 | 0.012   | 0.412           |

Online Supplemental Table IV: mG4H-STZ Only

| Gene Symbol                 | RefSeq                      | Description                                                                                                                                               | logFC<br>mG4H-<br>STZ | P-value | Adj.<br>P-value |
|-----------------------------|-----------------------------|-----------------------------------------------------------------------------------------------------------------------------------------------------------|-----------------------|---------|-----------------|
| Cx3cr1                      | NM_009987                   | ref Mus musculus chemokine (C-X3-C) receptor 1 (Cx3cr1), mRNA [NM_009987]                                                                                 | -1.12                 | 0.019   | 0.441           |
| chr12:110738120-110769295_F | chr12:110738120-110769295_F | lincRNA:chr12:110738120-110769295 forward strand                                                                                                          | -1.12                 | 0.003   | 0.306           |
| Arhgap24                    | NM_029270                   | ref Mus musculus Rho GTPase activating protein 24 (Arhgap24), transcript variant 1, mRNA [NM_029270]                                                      | -1.16                 | 0.023   | 0.454           |
| Olf1076                     | NM_146406                   | ref Mus musculus olfactory receptor 1076 (Olf1076), mRNA [NM_146406]                                                                                      | -1.18                 | 0.047   | 0.515           |
| chr8:114477602-114488627_F  | chr8:114477602-114488627_F  | lincRNA:chr8:114477602-114488627 forward strand                                                                                                           | -1.18                 | 0.002   | 0.275           |
| Tfrc                        | NM_011638                   | ref Mus musculus transferrin receptor (Tfrc), mRNA [NM_011638]                                                                                            | -1.18                 | 0.035   | 0.495           |
| chr7:4827340-4863315_F      | chr7:4827340-4863315_F      | lincRNA:chr7:4827340-4863315 forward strand                                                                                                               | -1.20                 | 0.011   | 0.406           |
| chr9:121845920-121858120_F  | chr9:121845920-121858120_F  | lincRNA:chr9:121845920-121858120 forward strand                                                                                                           | -1.21                 | 0.042   | 0.508           |
| LOC638560                   | XM_914625                   | ref PREDICTED: Mus musculus similar to hCG2038926 (LOC638560), mRNA [XM_914625]                                                                           | -1.23                 | 0.030   | 0.477           |
| chr7:71231097-71233680_R    | chr7:71231097-71233680_R    | lincRNA:chr7:71231097-71233680 reverse strand                                                                                                             | -1.25                 | 0.000   | 0.115           |
| chr7:48794017-48815817_R    | chr7:48794017-48815817_R    | lincRNA:chr7:48794017-48815817 reverse strand                                                                                                             | -1.27                 | 0.036   | 0.495           |
| Gm7276                      | AK158289                    | gb Mus musculus adult inner ear cDNA, RIKEN full-length enriched library, clone:F930101C16 product:hypothetical protein, full insert sequence. [AK158289] | -1.29                 | 0.003   | 0.281           |
| Fam83b                      | NM_001045518                | ref Mus musculus family with sequence similarity 83, member B (Fam83b), mRNA [NM_001045518]                                                               | -1.30                 | 0.004   | 0.318           |
| Olf99                       | NM_146515                   | ref Mus musculus olfactory receptor 99 (Olf99), mRNA [NM_146515]                                                                                          | -1.31                 | 0.004   | 0.335           |
| chr12:8451791-8452287_R     | chr12:8451791-8452287_R     | lincRNA:chr12:8451791-8452287 reverse strand                                                                                                              | -1.32                 | 0.036   | 0.495           |
| chr2:78761468-78772543_R    | chr2:78761468-78772543_R    | lincRNA:chr2:78761468-78772543 reverse strand                                                                                                             | -1.40                 | 0.042   | 0.508           |
| chr16:91174611-91200786_F   | chr16:91174611-91200786_F   | lincRNA:chr16:91174611-91200786 forward strand                                                                                                            | -1.42                 | 0.017   | 0.433           |
| chr9:13224147-13424397_F    | chr9:13224147-13424397_F    | lincRNA:chr9:13224147-13424397 forward strand                                                                                                             | -1.42                 | 0.000   | 0.121           |
| chr12:72103832-72116875_F   | chr12:72103832-72116875_F   | lincRNA:chr12:72103832-72116875 forward strand                                                                                                            | -1.53                 | 0.012   | 0.409           |
| chr6:120670699-120677449_R  | chr6:120670699-120677449_R  | lincRNA:chr6:120670699-120677449 reverse strand                                                                                                           | -1.57                 | 0.021   | 0.450           |
| chr7:26202452-26224557_F    | chr7:26202452-26224557_F    | lincRNA:chr7:26202452-26224557 forward strand                                                                                                             | -1.62                 | 0.030   | 0.477           |
| Vmn2r48                     | NM_001105152                | ref Mus musculus vomeronasal 2, receptor 48 (Vmn2r48), mRNA [NM_001105152]                                                                                | -1.62                 | 0.039   | 0.499           |
| Cx3cr1                      | NM_009987                   | ref Mus musculus chemokine (C-X3-C) receptor 1 (Cx3cr1), mRNA [NM_009987]                                                                                 | -1.72                 | 0.043   | 0.509           |
| chr7:114369337-114407862_F  | chr7:114369337-114407862_F  | lincRNA:chr7:114369337-114407862 forward strand                                                                                                           | -1.93                 | 0.011   | 0.406           |
| EG667188                    | XM_001476143                | ref PREDICTED: Mus musculus predicted gene, EG667188 (EG667188), mRNA [XM_001476143]                                                                      | -2.41                 | 0.000   | 0.084           |

| Online Supplemental Table IV: Con-STZ Only |                           |                                                                                                                                                                                             |                  |         |                 |
|--------------------------------------------|---------------------------|---------------------------------------------------------------------------------------------------------------------------------------------------------------------------------------------|------------------|---------|-----------------|
| Gene Symbol                                | RefSeq                    | Description                                                                                                                                                                                 | logFC<br>Con-STZ | P-value | Adj.<br>P-value |
| Mmp3                                       | NM_010809                 | ref  Mus musculus matrix metalloproteinase 3 (Mmp3), mRNA [NM_010809]                                                                                                                       | 1.51             | 0.000   | 0.021           |
| Mthfd2                                     | NM_008638                 | ref  Mus musculus methylenetetrahydrofolate dehydrogenase (NAD+ dependent), methenyltetrahydrofolate cyclohydrolase (Mthfd2), nuclear gene encoding mitochondrial protein, mRNA [NM_008638] | 1.49             | 0.000   | 0.011           |
| Map3k6                                     | AB021861                  | gb  Mus musculus ASK2 mRNA for apoptosis signal-regulating kinase 2, complete cds. [AB021861]                                                                                               | 1.49             | 0.004   | 0.127           |
| Map3k6                                     | NM_016693                 | ref  Mus musculus mitogen-activated protein kinase kinase kinase 6 (Map3k6), mRNA [NM_016693]                                                                                               | 1.48             | 0.005   | 0.147           |
| ENSMUST00000097860                         | ENSMUST00000097860        | ens  protein tyrosine phosphatase, receptor type, U Gene [Source:MGI (curated);Acc:MGI:1321151] [ENSMUST00000097860]                                                                        | 1.44             | 0.042   | 0.423           |
| Slc10a6                                    | NM_029415                 | ref  Mus musculus solute carrier family 10 (sodium/bile acid cotransporter family), member 6 (Slc10a6), mRNA [NM_029415]                                                                    | 1.43             | 0.002   | 0.097           |
| Fam107a                                    | NM_183187                 | ref  Mus musculus family with sequence similarity 107, member A (Fam107a), mRNA [NM_183187]                                                                                                 | 1.39             | 0.015   | 0.260           |
| Per1                                       | NM_011065                 | ref  Mus musculus period homolog 1 (Drosophila) (Per1), transcript variant 1, mRNA [NM_011065]                                                                                              | 1.37             | 0.003   | 0.110           |
| Scd4                                       | NM_183216                 | ref  Mus musculus stearyl-coenzyme A desaturase 4 (Scd4), mRNA [NM_183216]                                                                                                                  | 1.33             | 0.000   | 0.001           |
| chr8:67542714-67561694_F                   | chr8:67542714-67561694_F  | lincRNA:chr8:67542714-67561694 forward strand                                                                                                                                               | 1.29             | 0.019   | 0.291           |
| Slc10a6                                    | NM_029415                 | ref  Mus musculus solute carrier family 10 (sodium/bile acid cotransporter family), member 6 (Slc10a6), mRNA [NM_029415]                                                                    | 1.27             | 0.001   | 0.076           |
| Lox                                        | NM_010728                 | ref  Mus musculus lysyl oxidase (Lox), mRNA [NM_010728]                                                                                                                                     | 1.27             | 0.003   | 0.120           |
| Cfd                                        | NM_013459                 | ref  Mus musculus complement factor D (adipsin) (Cfd), mRNA [NM_013459]                                                                                                                     | 1.27             | 0.014   | 0.257           |
| Postn                                      | NM_015784                 | ref  Mus musculus periostin, osteoblast specific factor (Postn), mRNA [NM_015784]                                                                                                           | 1.23             | 0.008   | 0.184           |
| Gm13078                                    | NM_001085412              | ref  Mus musculus predicted gene 13078 (Gm13078), mRNA [NM_001085412]                                                                                                                       | 1.22             | 0.028   | 0.351           |
| Saa3                                       | NM_011315                 | ref  Mus musculus serum amyloid A 3 (Saa3), mRNA [NM_011315]                                                                                                                                | 1.18             | 0.002   | 0.087           |
| ENSMUST00000100092                         | ENSMUST00000100092        | ens  signal transducing adaptor molecule (SH3 domain and ITAM motif) 2 Gene [Source:MGI (curated);Acc:MGI:1929100] [ENSMUST00000100092]                                                     | 1.17             | 0.003   | 0.110           |
| C4b                                        | NM_009780                 | ref  Mus musculus complement component 4B (Childo blood group) (C4b), mRNA [NM_009780]                                                                                                      | 1.15             | 0.001   | 0.078           |
| Fkbp5                                      | NM_010220                 | ref  Mus musculus FK506 binding protein 5 (Fkbp5), mRNA [NM_010220]                                                                                                                         | 1.13             | 0.009   | 0.204           |
| chr15:32167516-32174427_R                  | chr15:32167516-32174427_R | lincRNA:chr15:32167516-32174427 reverse strand                                                                                                                                              | 1.09             | 0.006   | 0.166           |
| Gm129                                      | NM_001033302              | ref  Mus musculus predicted gene 129 (Gm129), mRNA [NM_001033302]                                                                                                                           | 1.08             | 0.001   | 0.080           |
| Fetub                                      | NM_021564                 | ref  Mus musculus fetuin beta (Fetub), transcript variant 1, mRNA [NM_021564]                                                                                                               | 1.04             | 0.015   | 0.260           |
| Pamr1                                      | NM_173749                 | ref  Mus musculus peptidase domain containing associated with muscle regeneration 1 (Pamr1), mRNA [NM_173749]                                                                               | 1.04             | 0.002   | 0.085           |
| Zbtb16                                     | NM_001033324              | ref  Mus musculus zinc finger and BTB domain containing 16 (Zbtb16), mRNA [NM_001033324]                                                                                                    | 1.03             | 0.027   | 0.342           |
| Kcnj4                                      | NM_008427                 | ref  Mus musculus potassium inwardly-rectifying channel, subfamily J, member 4 (Kcnj4), mRNA [NM_008427]                                                                                    | 1.03             | 0.010   | 0.208           |
| Cebpd                                      | NM_007679                 | ref  Mus musculus CCAAT/enhancer binding protein (C/EBP), delta (Cebpd), mRNA [NM_007679]                                                                                                   | 1.03             | 0.001   | 0.058           |

Online Supplemental Table IV: Con-STZ Only

| Gene Symbol               | RefSeq                    | Description                                                                                                                                                       | logFC<br>Con-STZ | P-value | Adj.<br>P-value |
|---------------------------|---------------------------|-------------------------------------------------------------------------------------------------------------------------------------------------------------------|------------------|---------|-----------------|
| Wee1                      | NM_009516                 | ref  Mus musculus WEE 1 homolog 1 (S. pombe) (Wee1), mRNA [NM_009516]                                                                                             | 1.03             | 0.003   | 0.126           |
| Gpnmb                     | NM_053110                 | ref  Mus musculus glycoprotein (transmembrane) nmb (Gpnmb), mRNA [NM_053110]                                                                                      | 1.02             | 0.000   | 0.025           |
| LOC100046015              | XM_001475355              | ref  PREDICTED: Mus musculus hypothetical protein LOC100046015 (LOC100046015), mRNA [XM_001475355]                                                                | 1.02             | 0.037   | 0.400           |
| Fhad1                     | NM_177868                 | ref  Mus musculus forkhead-associated (FHA) phosphopeptide binding domain 1 (Fhad1), mRNA [NM_177868]                                                             | 1.01             | 0.001   | 0.062           |
| Gm12551                   | XM_001474593              | ref  PREDICTED: Mus musculus similar to adipose differentiation related protein (LOC100040388), mRNA [XM_001474593]                                               | 1.00             | 0.001   | 0.072           |
| Hp                        | NM_017370                 | ref  Mus musculus haptoglobin (Hp), mRNA [NM_017370]                                                                                                              | 0.99             | 0.037   | 0.399           |
| chr12:16447954-16448489_F | chr12:16447954-16448489_F | lincRNA:chr12:16447954-16448489 forward strand                                                                                                                    | 0.99             | 0.049   | 0.456           |
| Gm5127                    | NM_001033541              | ref  Mus musculus predicted gene 5127 (Gm5127), mRNA [NM_001033541]                                                                                               | 0.95             | 0.020   | 0.295           |
| Has1                      | NM_008215                 | ref  Mus musculus hyaluronan synthase1 (Has1), mRNA [NM_008215]                                                                                                   | 0.95             | 0.006   | 0.170           |
| Mcoln3                    | ENSMUST00000039450        | ens  mucolipin 3 Gene [Source:MGI (curated);Acc:MGI:1890500] [ENSMUST00000039450]                                                                                 | 0.93             | 0.006   | 0.161           |
| A630052K13Rik             | AK042023                  | gb  Mus musculus 3 days neonate thymus cDNA, RIKEN full-length enriched library, clone:A630052K13 product: hypothetical protein, full insert sequence. [AK042023] | 0.93             | 0.005   | 0.154           |
| Mfap4                     | NM_029568                 | ref  Mus musculus microfibrillar-associated protein 4 (Mfap4), mRNA [NM_029568]                                                                                   | 0.93             | 0.004   | 0.130           |
| Tfdp2                     | NM_178667                 | ref  Mus musculus transcription factor Dp 2 (Tfdp2), transcript variant 1, mRNA [NM_178667]                                                                       | 0.92             | 0.028   | 0.349           |
| Cfi                       | NM_007686                 | ref  Mus musculus complement component factor i (Cfi), mRNA [NM_007686]                                                                                           | 0.92             | 0.006   | 0.157           |
| Srpx                      | NM_016911                 | ref  Mus musculus sushi-repeat-containing protein (Srpx), mRNA [NM_016911]                                                                                        | 0.92             | 0.002   | 0.090           |
| Ranbp3l                   | NM_198024                 | ref  Mus musculus RAN binding protein 3-like (Ranbp3l), mRNA [NM_198024]                                                                                          | 0.91             | 0.032   | 0.374           |
| chr17:10057283-10075014_F | chr17:10057283-10075014_F | lincRNA:chr17:10057283-10075014 forward strand                                                                                                                    | 0.90             | 0.001   | 0.059           |
| Kcne2                     | NM_134110                 | ref  Mus musculus potassium voltage-gated channel, Isk-related subfamily, gene 2 (Kcne2), mRNA [NM_134110]                                                        | 0.90             | 0.029   | 0.356           |
| Gm3459                    | XM_001476778              | ref  PREDICTED: Mus musculus similar to pol protein (LOC100041663), mRNA [XM_001476778]                                                                           | 0.89             | 0.015   | 0.263           |
| Hal                       | NM_010401                 | ref  Mus musculus histidine ammonia lyase (Hal), mRNA [NM_010401]                                                                                                 | 0.89             | 0.000   | 0.013           |
| Ms4a13                    | NM_198224                 | ref  Mus musculus membrane-spanning 4-domains, subfamily A, member 13 (Ms4a13), mRNA [NM_198224]                                                                  | 0.89             | 0.030   | 0.363           |
| chr7:49715933-49771497_F  | chr7:49715933-49771497_F  | lincRNA:chr7:49715933-49771497 forward strand                                                                                                                     | 0.87             | 0.022   | 0.314           |
| Chi3l1                    | NM_007695                 | ref  Mus musculus chitinase 3-like 1 (Chi3l1), mRNA [NM_007695]                                                                                                   | 0.87             | 0.011   | 0.226           |
| chrX:90997595-91009570_R  | chrX:90997595-91009570_R  | lincRNA:chrX:90997595-91009570 reverse strand                                                                                                                     | 0.87             | 0.005   | 0.147           |
| Olfr635                   | NM_147118                 | ref  Mus musculus olfactory receptor 635 (Olfr635), mRNA [NM_147118]                                                                                              | 0.86             | 0.015   | 0.263           |
| Slc1a2                    | NM_011393                 | ref  Mus musculus solute carrier family 1 (glial high affinity glutamate transporter), member 2 (Slc1a2), transcript variant 3, mRNA [NM_011393]                  | 0.86             | 0.001   | 0.064           |
| Saa2                      | NM_011314                 | ref  Mus musculus serum amyloid A 2 (Saa2), mRNA [NM_011314]                                                                                                      | 0.86             | 0.023   | 0.321           |

| Online Supplemental Table IV: Con-STZ Only |                           |                                                                                                                                                                                                    |                  |         |                 |
|--------------------------------------------|---------------------------|----------------------------------------------------------------------------------------------------------------------------------------------------------------------------------------------------|------------------|---------|-----------------|
| Gene Symbol                                | RefSeq                    | Description                                                                                                                                                                                        | logFC<br>Con-STZ | P-value | Adj.<br>P-value |
| chr3:88009045-88036270_F                   | chr3:88009045-88036270_F  | lincRNA:chr3:88009045-88036270 forward strand                                                                                                                                                      | 0.86             | 0.025   | 0.332           |
| chr5:91480533-91502237_R                   | chr5:91480533-91502237_R  | lincRNA:chr5:91480533-91502237 reverse strand                                                                                                                                                      | 0.85             | 0.020   | 0.295           |
| Ereg                                       | NM_007950                 | ref  Mus musculus epiregulin (Ereg), mRNA [NM_007950]                                                                                                                                              | 0.85             | 0.016   | 0.269           |
| Mndal                                      | NM_001170853              | ref  Mus musculus myeloid nuclear differentiation antigen like (Mndal), mRNA [NM_001170853]                                                                                                        | 0.85             | 0.003   | 0.106           |
| Thbs2                                      | NM_011581                 | ref  Mus musculus thrombospondin 2 (Thbs2), mRNA [NM_011581]                                                                                                                                       | 0.85             | 0.004   | 0.128           |
| ENSMUST00000120398                         | ENSMUST00000120398        | gb  Mus musculus adult retina cDNA, RIKEN full-length enriched library, clone:A930013N02 product:hypothetical protein, full insert sequence. [AK044447]                                            | 0.84             | 0.025   | 0.331           |
| Slc4a10                                    | NM_033552                 | ref  Mus musculus solute carrier family 4, sodium bicarbonate cotransporter-like, member 10 (Slc4a10), mRNA [NM_033552]                                                                            | 0.84             | 0.025   | 0.331           |
| Mfap5                                      | NM_015776                 | ref  Mus musculus microfibrillar associated protein 5 (Mfap5), mRNA [NM_015776]                                                                                                                    | 0.84             | 0.001   | 0.072           |
| S100a4                                     | NM_011311                 | ref  Mus musculus S100 calcium binding protein A4 (S100a4), mRNA [NM_011311]                                                                                                                       | 0.84             | 0.001   | 0.065           |
| Gm8122                                     | XM_984060                 | ref  PREDICTED: Mus musculus predicted gene, EG666471 (EG666471), mRNA [XM_984060]                                                                                                                 | 0.84             | 0.017   | 0.278           |
| Gm2410                                     | XM_001473667              | ref  PREDICTED: Mus musculus hypothetical protein LOC100039761 (LOC100039761), mRNA [XM_001473667]                                                                                                 | 0.83             | 0.016   | 0.273           |
| Gm7999                                     | XM_982515                 | ref  PREDICTED: Mus musculus predicted gene, EG666239 (EG666239), mRNA [XM_982515]                                                                                                                 | 0.83             | 0.009   | 0.206           |
| Sly                                        | NM_201530                 | ref  Mus musculus Sycp3 like Y-linked (Sly), mRNA [NM_201530]                                                                                                                                      | 0.83             | 0.001   | 0.070           |
| ENSMUST00000063955                         | ENSMUST00000063955        | ens  Putative uncharacterized protein [Source:UniProtKB/TrEMBL;Acc:Q8BR24] [ENSMUST00000063955]                                                                                                    | 0.82             | 0.000   | 0.045           |
| Gadl1                                      | NM_028638                 | ref  Mus musculus glutamate decarboxylase-like 1 (Gadl1), mRNA [NM_028638]                                                                                                                         | 0.82             | 0.050   | 0.457           |
| Mnda                                       | NM_001033450              | ref  Mus musculus myeloid cell nuclear differentiation antigen (Mnda), mRNA [NM_001033450]                                                                                                         | 0.81             | 0.012   | 0.232           |
| Hspa1a                                     | NM_010479                 | ref  Mus musculus heat shock protein 1A (Hspa1a), mRNA [NM_010479]                                                                                                                                 | 0.80             | 0.003   | 0.117           |
| chr2:48807211-48843911_F                   | chr2:48807211-48843911_F  | lincRNA:chr2:48807211-48843911 forward strand                                                                                                                                                      | 0.80             | 0.044   | 0.430           |
| C3                                         | NM_009778                 | ref  Mus musculus complement component 3 (C3), mRNA [NM_009778]                                                                                                                                    | 0.79             | 0.004   | 0.133           |
| Dync1i1                                    | NM_010063                 | ref  Mus musculus dynein cytoplasmic 1 intermediate chain 1 (Dync1i1), mRNA [NM_010063]                                                                                                            | 0.79             | 0.002   | 0.096           |
| Il6                                        | NM_031168                 | ref  Mus musculus interleukin 6 (Il6), mRNA [NM_031168]                                                                                                                                            | 0.79             | 0.027   | 0.346           |
| Dkk3                                       | NM_015814                 | ref  Mus musculus dickkopf homolog 3 (Xenopus laevis) (Dkk3), mRNA [NM_015814]                                                                                                                     | 0.79             | 0.043   | 0.429           |
| Cebpb                                      | NM_009883                 | ref  Mus musculus CCAAT/enhancer binding protein (C/EBP), beta (Cebpb), mRNA [NM_009883]                                                                                                           | 0.78             | 0.003   | 0.126           |
| Cubn                                       | NM_001081084              | ref  Mus musculus cubilin (intrinsic factor-cobalamin receptor) (Cubn), mRNA [NM_001081084]                                                                                                        | 0.78             | 0.006   | 0.166           |
| chr15:32705156-32729116_R                  | chr15:32705156-32729116_R | lincRNA:chr15:32705156-32729116 reverse strand                                                                                                                                                     | 0.77             | 0.012   | 0.232           |
| 6720482D04                                 | AK032964                  | gb  Mus musculus 12 days embryo male wolffian duct includes surrounding region cDNA, RIKEN full-length enriched library, clone:6720482D04 product:unclassifiable, full insert sequence. [AK032964] | 0.77             | 0.028   | 0.349           |
| Ncam1                                      | NM_010875                 | ref  Mus musculus neural cell adhesion molecule 1 (Ncam1), transcript variant 2, mRNA [NM_010875]                                                                                                  | 0.77             | 0.002   | 0.099           |

| Online Supplemental Table IV: Con-STZ Only |                            |                                                                                                             |                  |         |                 |
|--------------------------------------------|----------------------------|-------------------------------------------------------------------------------------------------------------|------------------|---------|-----------------|
| Gene Symbol                                | RefSeq                     | Description                                                                                                 | logFC<br>Con-STZ | P-value | Adj.<br>P-value |
| Asns                                       | NM_012055                  | ref  Mus musculus asparagine synthetase (Asns), mRNA [NM_012055]                                            | 0.77             | 0.003   | 0.116           |
| Dear1                                      | NM_001040461               | ref  Mus musculus dual endothelin 1/angiotensin II receptor 1 homolog (rat) (Dear1), mRNA [NM_001040461]    | 0.77             | 0.029   | 0.355           |
| Marco                                      | NM_010766                  | ref  Mus musculus macrophage receptor with collagenous structure (Marco), mRNA [NM_010766]                  | 0.76             | 0.006   | 0.167           |
| chr6:108556270-108573161_F                 | chr6:108556270-108573161_F | lincRNA:chr6:108556270-108573161 forward strand                                                             | 0.76             | 0.035   | 0.391           |
| chr12:86421771-86422222_F                  | chr12:86421771-86422222_F  | lincRNA:chr12:86421771-86422222 forward strand                                                              | 0.76             | 0.020   | 0.300           |
| Mc2r                                       | NM_008560                  | ref  Mus musculus melanocortin 2 receptor (Mc2r), mRNA [NM_008560]                                          | 0.76             | 0.002   | 0.099           |
| Ifi2712b                                   | NM_145449                  | ref  Mus musculus interferon, alpha-inducible protein 27 like 2B (Ifi2712b), mRNA [NM_145449]               | 0.76             | 0.048   | 0.449           |
| Btg2                                       | NM_007570                  | ref  Mus musculus B-cell translocation gene 2, anti-proliferative (Btg2), mRNA [NM_007570]                  | 0.75             | 0.001   | 0.073           |
| Eno2                                       | NM_013509                  | ref  Mus musculus enolase 2, gamma neuronal (Eno2), mRNA [NM_013509]                                        | 0.75             | 0.000   | 0.015           |
| Gclm                                       | NM_008129                  | ref  Mus musculus glutamate-cysteine ligase, modifier subunit (Gclm), mRNA [NM_008129]                      | 0.75             | 0.050   | 0.457           |
| Gm7315                                     | XR_035512                  | ref  PREDICTED: Mus musculus hypothetical LOC640963 (LOC640963), misc RNA [XR_035512]                       | 0.75             | 0.041   | 0.418           |
| D15Ertd50e                                 | BG079244                   | gb  H3037E07-5 NIA Mouse 15K cDNA Clone Set Mus musculus cDNA clone H3037E07 5', mRNA sequence [BG079244]   | 0.75             | 0.029   | 0.354           |
| Myl6b                                      | NM_172259                  | ref  Mus musculus myosin, light polypeptide 6B (Myl6b), mRNA [NM_172259]                                    | 0.74             | 0.047   | 0.446           |
| chr15:32167516-32174417_R                  | chr15:32167516-32174417_R  | lincRNA:chr15:32167516-32174417 reverse strand                                                              | 0.74             | 0.004   | 0.133           |
| Ppap2a                                     | NM_008903                  | ref  Mus musculus phosphatidic acid phosphatase type 2A (Ppap2a), transcript variant 2, mRNA [NM_008903]    | 0.74             | 0.017   | 0.278           |
| Zfp36                                      | NM_011756                  | ref  Mus musculus zinc finger protein 36 (Zfp36), mRNA [NM_011756]                                          | 0.74             | 0.017   | 0.275           |
| Cldn16                                     | NM_053241                  | ref  Mus musculus claudin 16 (Cldn16), mRNA [NM_053241]                                                     | 0.74             | 0.010   | 0.208           |
| Olf1255                                    | NM_146977                  | ref  Mus musculus olfactory receptor 1255 (Olf1255), mRNA [NM_146977]                                       | 0.74             | 0.035   | 0.388           |
| Clec10a                                    | NM_010796                  | ref  Mus musculus C-type lectin domain family 10, member A (Clec10a), mRNA [NM_010796]                      | 0.74             | 0.005   | 0.148           |
| ENSMUST00000120588                         | ENSMUST00000120588         | ens  leucine rich repeat containing 18 Gene [Source:MGI (curated);Acc:MGI:1914830] [ENSMUST00000120588]     | 0.73             | 0.043   | 0.428           |
| Txndc6                                     | NM_001165957               | ref  Mus musculus thioredoxin domain containing 6 (Txndc6), mRNA [NM_001165957]                             | 0.73             | 0.030   | 0.364           |
| C5ar1                                      | NM_001173550               | ref  Mus musculus complement component 5a receptor 1 (C5ar1), transcript variant 2, mRNA [NM_001173550]     | 0.73             | 0.001   | 0.074           |
| Krt18                                      | NM_010664                  | ref  Mus musculus keratin 18 (Krt18), mRNA [NM_010664]                                                      | 0.73             | 0.004   | 0.130           |
| Fcna                                       | NM_007995                  | ref  Mus musculus ficolin A (Fcna), mRNA [NM_007995]                                                        | 0.73             | 0.000   | 0.040           |
| ENSMUST00000110541                         | ENSMUST00000110541         | ens  alanine-glyoxylate aminotransferase 2 Gene [Source:MGI (curated);Acc:MGI:2146052] [ENSMUST00000110541] | 0.72             | 0.021   | 0.308           |
| Vipr2                                      | NM_009511                  | ref  Mus musculus vasoactive intestinal peptide receptor 2 (Vipr2), mRNA [NM_009511]                        | 0.72             | 0.000   | 0.021           |
| chr13:51248372-51259297_R                  | chr13:51248372-51259297_R  | lincRNA:chr13:51248372-51259297 reverse strand                                                              | 0.72             | 0.012   | 0.238           |
| Tdrd5                                      | NM_001134741               | ref  Mus musculus tudor domain containing 5 (Tdrd5), mRNA [NM_001134741]                                    | 0.72             | 0.039   | 0.409           |
| LOC100044430                               | XM_001472240               | ref  PREDICTED: Mus musculus similar to Interferon activated gene 205 (LOC100044430), mRNA [XM_001472240]   | 0.72             | 0.003   | 0.125           |



| Online Supplemental Table IV: Con-STZ Only |                           |                                                                                                                                                                                    |                  |         |                 |
|--------------------------------------------|---------------------------|------------------------------------------------------------------------------------------------------------------------------------------------------------------------------------|------------------|---------|-----------------|
| Gene Symbol                                | RefSeq                    | Description                                                                                                                                                                        | logFC<br>Con-STZ | P-value | Adj.<br>P-value |
| Mpa2l                                      | NM_194336                 | ref  Mus musculus macrophage activation 2 like (Mpa2l), mRNA [NM_194336]                                                                                                           | 0.72             | 0.003   | 0.121           |
| Hmga2-ps1                                  | AK033703                  | gb  Mus musculus adult male cecum cDNA, RIKEN full-length enriched library, clone:9130226K06 product:high mobility group AT-hook 2, pseudogene 1, full insert sequence. [AK033703] | 0.71             | 0.001   | 0.052           |
| Ccrl1                                      | AY072938                  | gb  Mus musculus chemokine receptor CCX CKR mRNA, complete cds, alternatively spliced. [AY072938]                                                                                  | 0.71             | 0.001   | 0.068           |
| Fam126b                                    | NM_172513                 | ref  Mus musculus family with sequence similarity 126, member B (Fam126b), mRNA [NM_172513]                                                                                        | 0.71             | 0.040   | 0.415           |
| Adams2                                     | NM_175643                 | ref  Mus musculus a disintegrin-like and metallopeptidase (reprolysin type) with thrombospondin type 1 motif, 2 (Adams2), mRNA [NM_175643]                                         | 0.71             | 0.009   | 0.205           |
| Igf2bp2                                    | NM_183029                 | ref  Mus musculus insulin-like growth factor 2 mRNA binding protein 2 (Igf2bp2), mRNA [NM_183029]                                                                                  | 0.71             | 0.005   | 0.152           |
| Olf1484                                    | NM_146291                 | ref  Mus musculus olfactory receptor 1484 (Olf1484), mRNA [NM_146291]                                                                                                              | 0.71             | 0.016   | 0.269           |
| chr4:46583780-46614788_R                   | chr4:46583780-46614788_R  | lincRNA:chr4:46583780-46614788 reverse strand                                                                                                                                      | 0.71             | 0.031   | 0.367           |
| Sgms1                                      | NM_144792                 | ref  Mus musculus sphingomyelin synthase 1 (Sgms1), transcript variant 2, mRNA [NM_144792]                                                                                         | 0.71             | 0.002   | 0.094           |
| Evi5                                       | NM_007964                 | ref  Mus musculus ecotropic viral integration site 5 (Evi5), mRNA [NM_007964]                                                                                                      | 0.70             | 0.015   | 0.260           |
| Kcne4                                      | NM_021342                 | ref  Mus musculus potassium voltage-gated channel, Isk-related subfamily, gene 4 (Kcne4), mRNA [NM_021342]                                                                         | 0.70             | 0.000   | 0.040           |
| Fgf6                                       | NM_010204                 | ref  Mus musculus fibroblast growth factor 6 (Fgf6), mRNA [NM_010204]                                                                                                              | 0.70             | 0.000   | 0.024           |
| Serping1                                   | NM_009776                 | ref  Mus musculus serine (or cysteine) peptidase inhibitor, clade G, member 1 (Serping1), mRNA [NM_009776]                                                                         | 0.70             | 0.002   | 0.100           |
| Fpr2                                       | NM_008039                 | ref  Mus musculus formyl peptide receptor 2 (Fpr2), mRNA [NM_008039]                                                                                                               | 0.70             | 0.006   | 0.161           |
| Gpr56                                      | NM_018882                 | ref  Mus musculus G protein-coupled receptor 56 (Gpr56), mRNA [NM_018882]                                                                                                          | 0.70             | 0.002   | 0.099           |
| 1700037F03Rik                              | BB242157                  | gb  BB242157 RIKEN full-length enriched, 3 days neonate thymus Mus musculus cDNA clone A630090K22 3'. [BB242157]                                                                   | 0.69             | 0.031   | 0.368           |
| AA467197                                   | NM_001004174              | ref  Mus musculus expressed sequence AA467197 (AA467197), mRNA [NM_001004174]                                                                                                      | 0.69             | 0.008   | 0.192           |
| Olf919                                     | NM_146440                 | ref  Mus musculus olfactory receptor 919 (Olf919), mRNA [NM_146440]                                                                                                                | 0.69             | 0.036   | 0.393           |
| Slc43a3                                    | NM_021398                 | ref  Mus musculus solute carrier family 43, member 3 (Slc43a3), mRNA [NM_021398]                                                                                                   | 0.69             | 0.002   | 0.097           |
| Sult1a1                                    | NM_133670                 | ref  Mus musculus sulfotransferase family 1A, phenol-preferring, member 1 (Sult1a1), mRNA [NM_133670]                                                                              | 0.69             | 0.045   | 0.439           |
| Aebp1                                      | NM_009636                 | ref  Mus musculus AE binding protein 1 (Aebp1), mRNA [NM_009636]                                                                                                                   | 0.68             | 0.002   | 0.091           |
| 2210409D07Rik                              | XM_901620                 | ref  PREDICTED: Mus musculus RIKEN cDNA 2210409D07 gene (2210409D07Rik), mRNA [XM_901620]                                                                                          | 0.68             | 0.002   | 0.103           |
| Olf733                                     | NM_146663                 | ref  Mus musculus olfactory receptor 733 (Olf733), mRNA [NM_146663]                                                                                                                | 0.68             | 0.016   | 0.273           |
| Dpysl3                                     | NM_001136086              | ref  Mus musculus dihydropyrimidinase-like 3 (Dpysl3), transcript variant 1, mRNA [NM_001136086]                                                                                   | 0.68             | 0.011   | 0.217           |
| Gm2301                                     | XM_001473078              | ref  PREDICTED: Mus musculus hypothetical protein LOC100039542 (LOC100039542), mRNA [XM_001473078]                                                                                 | 0.68             | 0.026   | 0.338           |
| chr19:23068397-23190256_F                  | chr19:23068397-23190256_F | lincRNA:chr19:23068397-23190256 forward strand                                                                                                                                     | 0.68             | 0.049   | 0.456           |
| Inpp4b                                     | NM_001024617              | ref  Mus musculus inositol polyphosphate-4-phosphatase, type II (Inpp4b), mRNA [NM_001024617]                                                                                      | 0.67             | 0.000   | 0.010           |

Online Supplemental Table IV: Con-STZ Only

| Gene Symbol               | RefSeq                    | Description                                                                                                            | logFC<br>Con-STZ | P-value | Adj.<br>P-value |
|---------------------------|---------------------------|------------------------------------------------------------------------------------------------------------------------|------------------|---------|-----------------|
| Ogg1                      | NM_010957                 | ref  Mus musculus 8-oxoguanine DNA-glycosylase 1 (Ogg1), nuclear gene encoding mitochondrial protein, mRNA [NM_010957] | 0.67             | 0.025   | 0.331           |
| chr7:48794017-48815817_R  | chr7:48794017-48815817_R  | lincRNA:chr7:48794017-48815817 reverse strand                                                                          | 0.67             | 0.036   | 0.395           |
| Gm7616                    | NM_001101600              | ref  Mus musculus predicted gene 7616 (Gm7616), mRNA [NM_001101600]                                                    | 0.66             | 0.032   | 0.372           |
| ENSMUST00000109958        | ENSMUST00000109958        | ref  PREDICTED: Mus musculus predicted gene, EG628900 (EG628900), mRNA [XM_893705]                                     | 0.66             | 0.017   | 0.278           |
| chr4:59093718-59108018_R  | chr4:59093718-59108018_R  | lincRNA:chr4:59093718-59108018 reverse strand                                                                          | 0.66             | 0.035   | 0.388           |
| Lhx6                      | NM_008500                 | ref  Mus musculus LIM homeobox protein 6 (Lhx6), transcript variant 1, mRNA [NM_008500]                                | 0.66             | 0.030   | 0.360           |
| Egfr                      | NM_007912                 | ref  Mus musculus epidermal growth factor receptor (Egfr), transcript variant 2, mRNA [NM_007912]                      | 0.65             | 0.000   | 0.034           |
| Gm7897                    | XM_988496                 | ref  PREDICTED: Mus musculus predicted gene, EG666028 (EG666028), mRNA [XM_988496]                                     | 0.65             | 0.012   | 0.231           |
| chr16:40283097-40284822_F | chr16:40283097-40284822_F | lincRNA:chr16:40283097-40284822 forward strand                                                                         | 0.65             | 0.008   | 0.192           |
| Serpina3g                 | NM_009251                 | ref  Mus musculus serine (or cysteine) peptidase inhibitor, clade A, member 3G (Serpina3g), mRNA [NM_009251]           | 0.65             | 0.011   | 0.223           |
| Inhbb                     | NM_008381                 | ref  Mus musculus inhibin beta-B (Inhbb), mRNA [NM_008381]                                                             | 0.65             | 0.001   | 0.053           |
| Cdc42ep1                  | NM_027219                 | ref  Mus musculus CDC42 effector protein (Rho GTPase binding) 1 (Cdc42ep1), mRNA [NM_027219]                           | 0.65             | 0.035   | 0.389           |
| Clec4e                    | NM_019948                 | ref  Mus musculus C-type lectin domain family 4, member e (Clec4e), mRNA [NM_019948]                                   | 0.65             | 0.017   | 0.277           |
| Abcb11                    | NM_021022                 | ref  Mus musculus ATP-binding cassette, sub-family B (MDR/TAP), member 11 (Abcb11), mRNA [NM_021022]                   | 0.65             | 0.031   | 0.369           |
| 2610028H24Rik             | NM_029816                 | ref  Mus musculus RIKEN cDNA 2610028H24 gene (2610028H24Rik), mRNA [NM_029816]                                         | 0.65             | 0.033   | 0.379           |
| Svep1                     | NM_022814                 | ref  Mus musculus sushi, von Willebrand factor type A, EGF and pentraxin domain containing 1 (Svep1), mRNA [NM_022814] | 0.65             | 0.007   | 0.179           |
| Lect1                     | NM_010701                 | ref  Mus musculus leukocyte cell derived chemotaxin 1 (Lect1), mRNA [NM_010701]                                        | 0.65             | 0.013   | 0.240           |
| Mtap1a                    | NM_032393                 | ref  Mus musculus microtubule-associated protein 1 A (Mtap1a), transcript variant 1, mRNA [NM_032393]                  | 0.65             | 0.002   | 0.093           |
| Igf1                      | NM_010512                 | ref  Mus musculus insulin-like growth factor 1 (Igf1), transcript variant 1, mRNA [NM_010512]                          | 0.65             | 0.001   | 0.068           |
| Olf1137                   | NM_001011833              | ref  Mus musculus olfactory receptor 1137 (Olf1137), mRNA [NM_001011833]                                               | 0.65             | 0.025   | 0.330           |
| Dpep1                     | NM_007876                 | ref  Mus musculus dipeptidase 1 (renal) (Dpep1), mRNA [NM_007876]                                                      | 0.65             | 0.010   | 0.209           |
| Dync1i1                   | NM_010063                 | ref  Mus musculus dynein cytoplasmic 1 intermediate chain 1 (Dync1i1), mRNA [NM_010063]                                | 0.64             | 0.002   | 0.102           |
| Rhobtb1                   | NM_001081347              | ref  Mus musculus Rho-related BTB domain containing 1 (Rhobtb1), mRNA [NM_001081347]                                   | 0.64             | 0.012   | 0.238           |
| Gm6890                    | NM_001099306              | ref  Mus musculus predicted gene 6890 (Gm6890), mRNA [NM_001099306]                                                    | 0.64             | 0.048   | 0.449           |
| chr8:71495043-71525582_R  | chr8:71495043-71525582_R  | lincRNA:chr8:71495043-71525582 reverse strand                                                                          | 0.64             | 0.016   | 0.272           |
| Gm3600                    | XM_001477308              | ref  PREDICTED: Mus musculus similar to polyQ-containing protein CAG-8 (LOC100041974), mRNA [XM_001477308]             | 0.64             | 0.034   | 0.382           |
| chr10:83181374-83249774_F | chr10:83181374-83249774_F | lincRNA:chr10:83181374-83249774 forward strand                                                                         | 0.64             | 0.000   | 0.046           |
| ENSMUST00000077710        | ENSMUST00000077710        | ens  predicted gene 6756 Gene [Source:MGI Symbol;Acc:MGI:3647509] [ENSMUST00000077710]                                 | 0.64             | 0.003   | 0.113           |

| Online Supplemental Table IV: Con-STZ Only |                            |                                                                                                                                                               |                  |         |                 |
|--------------------------------------------|----------------------------|---------------------------------------------------------------------------------------------------------------------------------------------------------------|------------------|---------|-----------------|
| Gene Symbol                                | RefSeq                     | Description                                                                                                                                                   | logFC<br>Con-STZ | P-value | Adj.<br>P-value |
| March1                                     | NM_175188                  | ref  Mus musculus membrane-associated ring finger (C3HC4) 1 (March1), transcript variant 3, mRNA [NM_175188]                                                  | 0.64             | 0.001   | 0.059           |
| Chac1                                      | NM_026929                  | ref  Mus musculus ChaC, cation transport regulator-like 1 (E. coli) (Chac1), mRNA [NM_026929]                                                                 | 0.64             | 0.013   | 0.243           |
| ENSMUST00000023090                         | ENSMUST00000023090         | ens  NEL-like 2 (chicken) Gene [Source:MGI Symbol;Acc:MGI:1858510] [ENSMUST00000023090]                                                                       | 0.64             | 0.018   | 0.282           |
| Fcgr3                                      | NM_010188                  | ref  Mus musculus Fc receptor, IgG, low affinity III (Fcgr3), mRNA [NM_010188]                                                                                | 0.63             | 0.005   | 0.154           |
| chr5:92548501-92566401_R                   | chr5:92548501-92566401_R   | lincRNA:chr5:92548501-92566401 reverse strand                                                                                                                 | 0.63             | 0.009   | 0.202           |
| Rnmt                                       | NM_026440                  | ref  Mus musculus RNA (guanine-7-) methyltransferase (Rnmt), transcript variant 1, mRNA [NM_026440]                                                           | 0.63             | 0.016   | 0.268           |
| Slc3a2                                     | NM_008577                  | ref  Mus musculus solute carrier family 3 (activators of dibasic and neutral amino acid transport), member 2 (Slc3a2), transcript variant 2, mRNA [NM_008577] | 0.63             | 0.000   | 0.027           |
| Ccdc80                                     | NM_026439                  | ref  Mus musculus coiled-coil domain containing 80 (Ccdc80), mRNA [NM_026439]                                                                                 | 0.63             | 0.001   | 0.069           |
| chr1:175653557-175671940_R                 | chr1:175653557-175671940_R | lincRNA:chr1:175653557-175671940 reverse strand                                                                                                               | 0.63             | 0.001   | 0.051           |
| Tmem144                                    | NM_027495                  | ref  Mus musculus transmembrane protein 144 (Tmem144), mRNA [NM_027495]                                                                                       | 0.63             | 0.002   | 0.094           |
| Lbp                                        | NM_008489                  | ref  Mus musculus lipopolysaccharide binding protein (Lbp), mRNA [NM_008489]                                                                                  | 0.63             | 0.005   | 0.146           |
| Panx1                                      | NM_019482                  | ref  Mus musculus pannexin 1 (Panx1), mRNA [NM_019482]                                                                                                        | 0.63             | 0.027   | 0.344           |
| chr5:53931541-53945241_R                   | chr5:53931541-53945241_R   | lincRNA:chr5:53931541-53945241 reverse strand                                                                                                                 | 0.63             | 0.003   | 0.123           |
| chr18:61781410-61788685_R                  | chr18:61781410-61788685_R  | lincRNA:chr18:61781410-61788685 reverse strand                                                                                                                | 0.62             | 0.014   | 0.258           |
| Lhx6                                       | NM_008500                  | ref  Mus musculus LIM homeobox protein 6 (Lhx6), transcript variant 1, mRNA [NM_008500]                                                                       | 0.62             | 0.004   | 0.138           |
| chr19:56815544-56821403_R                  | chr19:56815544-56821403_R  | lincRNA:chr19:56815544-56821403 reverse strand                                                                                                                | 0.62             | 0.001   | 0.054           |
| Nox4                                       | NM_015760                  | ref  Mus musculus NADPH oxidase 4 (Nox4), mRNA [NM_015760]                                                                                                    | 0.62             | 0.000   | 0.038           |
| Wdfy1                                      | NM_027057                  | ref  Mus musculus WD repeat and FYVE domain containing 1 (Wdfy1), transcript variant 2, mRNA [NM_027057]                                                      | 0.62             | 0.007   | 0.179           |
| Cyp2e1                                     | NM_021282                  | ref  Mus musculus cytochrome P450, family 2, subfamily e, polypeptide 1 (Cyp2e1), mRNA [NM_021282]                                                            | 0.62             | 0.020   | 0.295           |
| Csf2rb2                                    | NM_007781                  | ref  Mus musculus colony stimulating factor 2 receptor, beta 2, low-affinity (granulocyte-macrophage) (Csf2rb2), mRNA [NM_007781]                             | 0.62             | 0.019   | 0.287           |
| Dleu7                                      | NM_173419                  | ref  Mus musculus deleted in lymphocytic leukemia, 7 (Dleu7), mRNA [NM_173419]                                                                                | 0.62             | 0.020   | 0.302           |
| ENSMUST00000069941                         | ENSMUST00000069941         | ens  butyrophilin related 1 Gene [Source:MGI (curated);Acc:MGI:2182073] [ENSMUST00000069941]                                                                  | 0.62             | 0.007   | 0.179           |
| Mcf2l                                      | NM_178076                  | ref  Mus musculus mcf.2 transforming sequence-like (Mcf2l), transcript variant 1, mRNA [NM_178076]                                                            | 0.62             | 0.010   | 0.210           |
| chr5:92562352-92562839_F                   | chr5:92562352-92562839_F   | lincRNA:chr5:92562352-92562839 forward strand                                                                                                                 | 0.61             | 0.031   | 0.370           |
| chr10:83185606-83225506_F                  | chr10:83185606-83225506_F  | lincRNA:chr10:83185606-83225506 forward strand                                                                                                                | 0.61             | 0.001   | 0.051           |
| chr1:175653557-175671940_R                 | chr1:175653557-175671940_R | lincRNA:chr1:175653557-175671940 reverse strand                                                                                                               | 0.61             | 0.002   | 0.085           |
| chr9:48889364-48910736_F                   | chr9:48889364-48910736_F   | lincRNA:chr9:48889364-48910736 forward strand                                                                                                                 | 0.61             | 0.005   | 0.151           |

| Online Supplemental Table IV: Con-STZ Only |                          |                                                                                                                                                                           |                  |         |                 |
|--------------------------------------------|--------------------------|---------------------------------------------------------------------------------------------------------------------------------------------------------------------------|------------------|---------|-----------------|
| Gene Symbol                                | RefSeq                   | Description                                                                                                                                                               | logFC<br>Con-STZ | P-value | Adj.<br>P-value |
| Clec4n                                     | NM_020001                | ref Mus musculus C-type lectin domain family 4, member n (Clec4n), transcript variant 1, mRNA [NM_020001]                                                                 | 0.61             | 0.011   | 0.226           |
| Olf446                                     | NM_146295                | ref Mus musculus olfactory receptor 446 (Olf446), mRNA [NM_146295]                                                                                                        | 0.61             | 0.004   | 0.128           |
| Serp6b                                     | NM_011454                | ref Mus musculus serine (or cysteine) peptidase inhibitor, clade B, member 6b (Serp6b), mRNA [NM_011454]                                                                  | 0.61             | 0.012   | 0.234           |
| Itih4                                      | NM_018746                | ref Mus musculus inter alpha-trypsin inhibitor, heavy chain 4 (Itih4), transcript variant 1, mRNA [NM_018746]                                                             | 0.61             | 0.001   | 0.046           |
| Mmp14                                      | NM_008608                | ref Mus musculus matrix metalloproteinase 14 (membrane-inserted) (Mmp14), mRNA [NM_008608]                                                                                | 0.61             | 0.000   | 0.019           |
| Ankrd2                                     | NM_020033                | ref Mus musculus ankyrin repeat domain 2 (stretch responsive muscle) (Ankrd2), mRNA [NM_020033]                                                                           | 0.61             | 0.018   | 0.285           |
| Btnl6                                      | NM_030747                | ref Mus musculus butyrophilin-like 6 (Btnl6), mRNA [NM_030747]                                                                                                            | 0.61             | 0.008   | 0.183           |
| Sucnr1                                     | NM_032400                | ref Mus musculus succinate receptor 1 (Sucnr1), mRNA [NM_032400]                                                                                                          | 0.61             | 0.016   | 0.267           |
| B020004C17Rik                              | XM_484380                | ref PREDICTED: Mus musculus RIKEN cDNA B020004C17 gene (B020004C17Rik), mRNA [XM_484380]                                                                                  | 0.61             | 0.020   | 0.298           |
| Gm8341                                     | XR_001935                | ref PREDICTED: Mus musculus predicted gene, EG666875 (EG666875), misc RNA [XR_001935]                                                                                     | 0.61             | 0.010   | 0.208           |
| 4933421H12Rik                              | AK016863                 | gb Mus musculus adult male testis cDNA, RIKEN full-length enriched library, clone:4933421H12 product:unclassifiable, full insert sequence. [AK016863]                     | 0.60             | 0.033   | 0.380           |
| A1480624                                   | AK089254                 | gb Mus musculus NOD-derived CD11c +ve dendritic cells cDNA, RIKEN full-length enriched library, clone:F630105N03 product:unclassifiable, full insert sequence. [AK089254] | 0.60             | 0.006   | 0.167           |
| Mgp                                        | NM_008597                | ref Mus musculus matrix Gla protein (Mgp), mRNA [NM_008597]                                                                                                               | 0.60             | 0.001   | 0.061           |
| Klrc3                                      | NM_021378                | ref Mus musculus killer cell lectin-like receptor subfamily C, member 3 (Klrc3), mRNA [NM_021378]                                                                         | 0.60             | 0.005   | 0.156           |
| Igf1                                       | NM_010512                | ref Mus musculus insulin-like growth factor 1 (Igf1), transcript variant 1, mRNA [NM_010512]                                                                              | 0.60             | 0.002   | 0.096           |
| Nov                                        | NM_010930                | ref Mus musculus nephroblastoma overexpressed gene (Nov), mRNA [NM_010930]                                                                                                | 0.60             | 0.017   | 0.278           |
| chr19:5798135-5800557_R                    | chr19:5798135-5800557_R  | lincRNA:chr19:5798135-5800557 reverse strand                                                                                                                              | 0.60             | 0.004   | 0.135           |
| Chpt1                                      | ENSMUST00000117440       | ens choline phosphotransferase 1 Gene [Source:MGI (curated);Acc:MGI:2384841] [ENSMUST00000117440]                                                                         | 0.60             | 0.003   | 0.117           |
| Rassf4                                     | NM_178045                | ref Mus musculus Ras association (RalGDS/AF-6) domain family member 4 (Rassf4), mRNA [NM_178045]                                                                          | 0.60             | 0.002   | 0.096           |
| Acp5                                       | NM_001102405             | ref Mus musculus acid phosphatase 5, tartrate resistant (Acp5), transcript variant 1, mRNA [NM_001102405]                                                                 | 0.60             | 0.007   | 0.179           |
| chr19:5798135-5800557_R                    | chr19:5798135-5800557_R  | lincRNA:chr19:5798135-5800557 reverse strand                                                                                                                              | 0.60             | 0.003   | 0.113           |
| Rasgef1a                                   | NM_027526                | ref Mus musculus RasGEF domain family, member 1A (Rasgef1a), mRNA [NM_027526]                                                                                             | 0.60             | 0.005   | 0.147           |
| Rp1                                        | NM_011283                | ref Mus musculus retinitis pigmentosa 1 (human) (Rp1), mRNA [NM_011283]                                                                                                   | 0.60             | 0.025   | 0.331           |
| 2410006H16Rik                              | NR_030738                | ref Mus musculus RIKEN cDNA 2410006H16 gene (2410006H16Rik), non-coding RNA [NR_030738]                                                                                   | 0.60             | 0.013   | 0.241           |
| chr7:48794017-48815817_R                   | chr7:48794017-48815817_R | lincRNA:chr7:48794017-48815817 reverse strand                                                                                                                             | 0.59             | 0.049   | 0.456           |
| Plekha4                                    | NM_148927                | ref Mus musculus pleckstrin homology domain containing, family A (phosphoinositide binding specific) member 4 (Plekha4), mRNA [NM_148927]                                 | 0.59             | 0.007   | 0.180           |
| Gem                                        | NM_010276                | ref Mus musculus GTP binding protein (gene overexpressed in skeletal muscle) (Gem), mRNA [NM_010276]                                                                      | 0.59             | 0.034   | 0.385           |

| Online Supplemental Table IV: Con-STZ Only |                            |                                                                                                                                              |                  |         |                 |
|--------------------------------------------|----------------------------|----------------------------------------------------------------------------------------------------------------------------------------------|------------------|---------|-----------------|
| Gene Symbol                                | RefSeq                     | Description                                                                                                                                  | logFC<br>Con-STZ | P-value | Adj.<br>P-value |
| Gm6221                                     | XM_885786                  | ref  PREDICTED: Mus musculus predicted gene, EG621380 (EG621380), mRNA [XM_885786]                                                           | 0.59             | 0.026   | 0.340           |
| Gm5127                                     | NM_001033541               | ref  Mus musculus predicted gene 5127 (Gm5127), mRNA [NM_001033541]                                                                          | 0.59             | 0.040   | 0.417           |
| chr3:51804655-51805883_R                   | chr3:51804655-51805883_R   | lincRNA:chr3:51804655-51805883 reverse strand                                                                                                | 0.59             | 0.036   | 0.393           |
| N4bp2l1                                    | NM_133898                  | ref  Mus musculus NEDD4 binding protein 2-like 1 (N4bp2l1), mRNA [NM_133898]                                                                 | 0.59             | 0.018   | 0.282           |
| Rufy4                                      | NM_001034060               | ref  Mus musculus RUN and FYVE domain containing 4 (Rufy4), transcript variant 2, mRNA [NM_001034060]                                        | 0.59             | 0.017   | 0.279           |
| BC026782                                   | NM_001025575               | ref  Mus musculus cDNA sequence BC026782 (BC026782), mRNA [NM_001025575]                                                                     | 0.59             | 0.003   | 0.106           |
| Slc25a34                                   | NM_001013780               | ref  Mus musculus solute carrier family 25, member 34 (Slc25a34), mRNA [NM_001013780]                                                        | 0.59             | 0.000   | 0.029           |
| chr7:71222899-71230614_R                   | chr7:71222899-71230614_R   | lincRNA:chr7:71222899-71230614 reverse strand                                                                                                | 0.58             | 0.049   | 0.456           |
| chr18:35970772-35971449_F                  | chr18:35970772-35971449_F  | lincRNA:chr18:35970772-35971449 forward strand                                                                                               | 0.58             | 0.019   | 0.293           |
| Tfdp2                                      | NM_178667                  | ref  Mus musculus transcription factor Dp 2 (Tfdp2), transcript variant 1, mRNA [NM_178667]                                                  | 0.58             | 0.015   | 0.263           |
| chr1:98768971-98780921_R                   | chr1:98768971-98780921_R   | lincRNA:chr1:98768971-98780921 reverse strand                                                                                                | 0.58             | 0.024   | 0.323           |
| Gm9210                                     | XR_035004                  | ref  PREDICTED: Mus musculus similar to 3-phosphoglycerate dehydrogenase (LOC668506), misc RNA [XR_035004]                                   | 0.58             | 0.006   | 0.157           |
| C030007I01Rik                              | CX236116                   | gb  NMA08932 Mus Musculus Lateral Ventricle Wall C57BL [CX236116]                                                                            | 0.58             | 0.006   | 0.168           |
| Fam71f1                                    | NM_207258                  | ref  Mus musculus family with sequence similarity 71, member F1 (Fam71f1), mRNA [NM_207258]                                                  | 0.58             | 0.038   | 0.405           |
| ENSMUST00000103421                         | ENSMUST00000103421         | ens  immunoglobulin heavy constant gamma 1 (G1m marker) Gene [Source:MGI Symbol;Acc:MGI:96446] [ENSMUST00000103421]                          | 0.58             | 0.039   | 0.412           |
| chr8:59966759-59989059_R                   | chr8:59966759-59989059_R   | lincRNA:chr8:59966759-59989059 reverse strand                                                                                                | 0.58             | 0.031   | 0.367           |
| Upp1                                       | NM_009477                  | ref  Mus musculus uridine phosphorylase 1 (Upp1), transcript variant 1, mRNA [NM_009477]                                                     | 0.58             | 0.001   | 0.076           |
| Ms4a6c                                     | NM_028595                  | ref  Mus musculus membrane-spanning 4-domains, subfamily A, member 6C (Ms4a6c), transcript variant 1, mRNA [NM_028595]                       | 0.58             | 0.008   | 0.193           |
| Adamts4                                    | NM_172845                  | ref  Mus musculus a disintegrin-like and metalloproteinase (reprolysin type) with thrombospondin type 1 motif, 4 (Adamts4), mRNA [NM_172845] | 0.58             | 0.012   | 0.230           |
| Gm2090                                     | XM_001472368               | ref  PREDICTED: Mus musculus hypothetical protein LOC100039191 (LOC100039191), mRNA [XM_001472368]                                           | 0.57             | 0.006   | 0.161           |
| chr8:87513394-87514107_R                   | chr8:87513394-87514107_R   | lincRNA:chr8:87513394-87514107 reverse strand                                                                                                | 0.57             | 0.013   | 0.241           |
| Sfrp1                                      | NM_013834                  | ref  Mus musculus secreted frizzled-related protein 1 (Sfrp1), mRNA [NM_013834]                                                              | 0.57             | 0.043   | 0.427           |
| chr19:29546348-29596479_R                  | chr19:29546348-29596479_R  | lincRNA:chr19:29546348-29596479 reverse strand                                                                                               | 0.57             | 0.036   | 0.395           |
| chr4:149445201-149445902_F                 | chr4:149445201-149445902_F | lincRNA:chr4:149445201-149445902 forward strand                                                                                              | 0.57             | 0.008   | 0.183           |
| Fam117b                                    | NM_001037725               | ref  Mus musculus family with sequence similarity 117, member B (Fam117b), transcript variant 1, mRNA [NM_001037725]                         | 0.57             | 0.010   | 0.216           |
| chr13:28898970-28901714_R                  | chr13:28898970-28901714_R  | lincRNA:chr13:28898970-28901714 reverse strand                                                                                               | 0.57             | 0.038   | 0.402           |

| Online Supplemental Table IV: Con-STZ Only |                           |                                                                                                                                                                        |                      |         |                 |
|--------------------------------------------|---------------------------|------------------------------------------------------------------------------------------------------------------------------------------------------------------------|----------------------|---------|-----------------|
| Gene Symbol                                | RefSeq                    | Description                                                                                                                                                            | logFC<br>Con-<br>STZ | P-value | Adj.<br>P-value |
| Sox2                                       | NM_011443                 | ref  Mus musculus SRY-box containing gene 2 (Sox2), mRNA [NM_011443]                                                                                                   | 0.57                 | 0.019   | 0.291           |
| Gm7160                                     | XM_921685                 | ref  PREDICTED: Mus musculus predicted gene, EG635504 (EG635504), mRNA [XM_921685]                                                                                     | 0.57                 | 0.001   | 0.071           |
| chr13:3477100-3497843_R                    | chr13:3477100-3497843_R   | lincRNA:chr13:3477100-3497843 reverse strand                                                                                                                           | 0.57                 | 0.007   | 0.182           |
| Slc45a3                                    | NM_145977                 | ref  Mus musculus solute carrier family 45, member 3 (Slc45a3), mRNA [NM_145977]                                                                                       | 0.57                 | 0.023   | 0.317           |
| Adamtsl2                                   | NM_029981                 | ref  Mus musculus ADAMTS-like 2 (Adamtsl2), mRNA [NM_029981]                                                                                                           | 0.57                 | 0.002   | 0.099           |
| LOC100048578                               | XM_001480568              | ref  PREDICTED: Mus musculus hypothetical protein LOC100048578 (LOC100048578), mRNA [XM_001480568]                                                                     | 0.57                 | 0.041   | 0.418           |
| ENSMUST00000034373                         | ENSMUST00000034373        | ens  dipeptidase 2 Gene [Source:MGI (curated);Acc:MGI:2442042] [ENSMUST00000034373]                                                                                    | 0.57                 | 0.000   | 0.023           |
| 2810449D17Rik                              | BY705366                  | gb  BY705366 RIKEN full-length enriched, adult male cerebellum Mus musculus cDNA clone 1500008C05 5'. [BY705366]                                                       | 0.56                 | 0.003   | 0.118           |
| Trib3                                      | NM_175093                 | ref  Mus musculus tribbles homolog 3 (Drosophila) (Trib3), mRNA [NM_175093]                                                                                            | 0.56                 | 0.001   | 0.063           |
| chr11:60728207-60745369_R                  | chr11:60728207-60745369_R | lincRNA:chr11:60728207-60745369 reverse strand                                                                                                                         | 0.56                 | 0.006   | 0.161           |
| 1500009L16Rik                              | NM_001145198              | ref  Mus musculus RIKEN cDNA 1500009L16 gene (1500009L16Rik), mRNA [NM_001145198]                                                                                      | 0.56                 | 0.005   | 0.151           |
| chr16:64758224-64765674_F                  | chr16:64758224-64765674_F | lincRNA:chr16:64758224-64765674 forward strand                                                                                                                         | 0.56                 | 0.026   | 0.336           |
| Fermt1                                     | NM_198029                 | ref  Mus musculus fermitin family homolog 1 (Drosophila) (Fermt1), mRNA [NM_198029]                                                                                    | 0.56                 | 0.033   | 0.379           |
| 1010001N08Rik                              | XM_001473782              | ref  PREDICTED: Mus musculus RIKEN cDNA 1010001N08 gene (1010001N08Rik), mRNA [XM_001473782]                                                                           | 0.56                 | 0.042   | 0.423           |
| Vmn2r-ps134                                | XM_884146                 | ref  PREDICTED: Mus musculus predicted gene, EG619775 (EG619775), mRNA [XM_884146]                                                                                     | 0.56                 | 0.014   | 0.252           |
| Edn3                                       | NM_007903                 | ref  Mus musculus endothelin 3 (Edn3), mRNA [NM_007903]                                                                                                                | 0.56                 | 0.002   | 0.088           |
| Gm3120                                     | XM_001475673              | ref  PREDICTED: Mus musculus hypothetical protein LOC100041064 (LOC100041064), mRNA [XM_001475673]                                                                     | 0.56                 | 0.017   | 0.278           |
| Tmem195                                    | NM_178767                 | ref  Mus musculus transmembrane protein 195 (Tmem195), mRNA [NM_178767]                                                                                                | 0.56                 | 0.003   | 0.106           |
| chr3:95502970-95503399_R                   | chr3:95502970-95503399_R  | lincRNA:chr3:95502970-95503399 reverse strand                                                                                                                          | 0.56                 | 0.035   | 0.387           |
| Hexim2                                     | NM_027658                 | ref  Mus musculus hexamethylene bis-acetamide inducible 2 (Hexim2), transcript variant 1, mRNA [NM_027658]                                                             | 0.56                 | 0.000   | 0.030           |
| Fcgr2b                                     | NM_001077189              | ref  Mus musculus Fc receptor, IgG, low affinity IIb (Fcgr2b), transcript variant 1, mRNA [NM_001077189]                                                               | 0.56                 | 0.019   | 0.291           |
| 4933431K23Rik                              | AK135599                  | gb  Mus musculus 1 day pregnant adult female ovary cDNA, RIKEN full-length enriched library, clone:7230402M02 product:unclassifiable, full insert sequence. [AK135599] | 0.56                 | 0.018   | 0.283           |
| chrX:20570399-20571162_F                   | chrX:20570399-20571162_F  | lincRNA:chrX:20570399-20571162 forward strand                                                                                                                          | 0.56                 | 0.004   | 0.130           |
| Ncam1                                      | NM_010875                 | ref  Mus musculus neural cell adhesion molecule 1 (Ncam1), transcript variant 2, mRNA [NM_010875]                                                                      | 0.56                 | 0.018   | 0.283           |
| Fbln2                                      | NM_007992                 | ref  Mus musculus fibulin 2 (Fbln2), transcript variant 1, mRNA [NM_007992]                                                                                            | 0.56                 | 0.002   | 0.096           |
| Nupr1                                      | NM_019738                 | ref  Mus musculus nuclear protein 1 (Nupr1), mRNA [NM_019738]                                                                                                          | 0.55                 | 0.001   | 0.066           |
| Gm6117                                     | XM_895552                 | ref  PREDICTED: Mus musculus predicted gene, EG619959 (EG619959), mRNA [XM_895552]                                                                                     | 0.55                 | 0.027   | 0.348           |



| Online Supplemental Table IV: Con-STZ Only |                            |                                                                                                                                                        |                  |         |                 |
|--------------------------------------------|----------------------------|--------------------------------------------------------------------------------------------------------------------------------------------------------|------------------|---------|-----------------|
| Gene Symbol                                | RefSeq                     | Description                                                                                                                                            | logFC<br>Con-STZ | P-value | Adj.<br>P-value |
| chr15:33983510-33985015_F                  | chr15:33983510-33985015_F  | lincRNA:chr15:33983510-33985015 forward strand                                                                                                         | 0.55             | 0.010   | 0.216           |
| Rnase4                                     | NM_021472                  | ref  Mus musculus ribonuclease, RNase A family 4 (Rnase4), transcript variant 1, mRNA [NM_021472]                                                      | 0.55             | 0.002   | 0.086           |
| Trpv2                                      | NM_011706                  | ref  Mus musculus transient receptor potential cation channel, subfamily V, member 2 (Trpv2), mRNA [NM_011706]                                         | 0.55             | 0.001   | 0.051           |
| Plp2                                       | NM_019755                  | ref  Mus musculus proteolipid protein 2 (Plp2), mRNA [NM_019755]                                                                                       | 0.55             | 0.001   | 0.059           |
| chr19:56815544-56821403_R                  | chr19:56815544-56821403_R  | lincRNA:chr19:56815544-56821403 reverse strand                                                                                                         | 0.55             | 0.009   | 0.205           |
| 5330437I02Rik                              | NM_177028                  | ref  Mus musculus RIKEN cDNA 5330437I02 gene (5330437I02Rik), mRNA [NM_177028]                                                                         | 0.55             | 0.038   | 0.405           |
| Dusp14                                     | NM_019819                  | ref  Mus musculus dual specificity phosphatase 14 (Dusp14), mRNA [NM_019819]                                                                           | 0.55             | 0.031   | 0.370           |
| AA517023                                   | BX527063                   | gb BX527063 Knowles Solter mouse E6 5d whole embryo Mus musculus cDNA clone IMAGp998O122217 ; IMAGE:893795, mRNA sequence [BX527063]                   | 0.55             | 0.016   | 0.273           |
| Speer5-ps1                                 | NR_001582                  | ref  Mus musculus spermatogenesis associated glutamate (E)-rich protein 5, pseudogene 1 (Speer5-ps1), transcript variant 1, non-coding RNA [NR_001582] | 0.55             | 0.014   | 0.251           |
| Htr2c                                      | NM_008312                  | ref  Mus musculus 5-hydroxytryptamine (serotonin) receptor 2C (Htr2c), mRNA [NM_008312]                                                                | 0.55             | 0.018   | 0.281           |
| S1pr1                                      | NM_007901                  | ref  Mus musculus sphingosine-1-phosphate receptor 1 (S1pr1), mRNA [NM_007901]                                                                         | 0.55             | 0.012   | 0.235           |
| Acbd7                                      | NM_030063                  | ref  Mus musculus acyl-Coenzyme A binding domain containing 7 (Acbd7), mRNA [NM_030063]                                                                | 0.55             | 0.004   | 0.135           |
| Fam102b                                    | NM_001163567               | ref  Mus musculus family with sequence similarity 102, member B (Fam102b), mRNA [NM_001163567]                                                         | 0.54             | 0.004   | 0.130           |
| Kiss1                                      | NM_178260                  | ref  Mus musculus KiSS-1 metastasis-suppressor (Kiss1), mRNA [NM_178260]                                                                               | 0.54             | 0.004   | 0.141           |
| Lipi                                       | NM_177142                  | ref  Mus musculus lipase, member I (Lipi), mRNA [NM_177142]                                                                                            | 0.54             | 0.002   | 0.085           |
| chr13:5506700-5519000_F                    | chr13:5506700-5519000_F    | lincRNA:chr13:5506700-5519000 forward strand                                                                                                           | 0.54             | 0.028   | 0.352           |
| chr12:20996314-21091646_F                  | chr12:20996314-21091646_F  | lincRNA:chr12:20996314-21091646 forward strand                                                                                                         | 0.54             | 0.008   | 0.191           |
| chr5:122993227-122993868_R                 | chr5:122993227-122993868_R | lincRNA:chr5:122993227-122993868 reverse strand                                                                                                        | 0.54             | 0.029   | 0.359           |
| chr12:76744947-76778372_R                  | chr12:76744947-76778372_R  | lincRNA:chr12:76744947-76778372 reverse strand                                                                                                         | 0.54             | 0.010   | 0.216           |
| Fam154a                                    | NM_001081096               | ref  Mus musculus family with sequence similarity 154, member A (Fam154a), mRNA [NM_001081096]                                                         | 0.54             | 0.032   | 0.374           |
| Slc4a8                                     | NM_021530                  | ref  Mus musculus solute carrier family 4 (anion exchanger), member 8 (Slc4a8), mRNA [NM_021530]                                                       | 0.54             | 0.016   | 0.267           |
| Lyz1                                       | NM_013590                  | ref  Mus musculus lysozyme 1 (Lyz1), mRNA [NM_013590]                                                                                                  | 0.54             | 0.024   | 0.329           |
| chr3:40439525-40509975_R                   | chr3:40439525-40509975_R   | lincRNA:chr3:40439525-40509975 reverse strand                                                                                                          | 0.54             | 0.006   | 0.157           |
| chr9:88333945-88342370_F                   | chr9:88333945-88342370_F   | lincRNA:chr9:88333945-88342370 forward strand                                                                                                          | 0.54             | 0.012   | 0.236           |
| Rspo2                                      | NM_172815                  | ref  Mus musculus R-spondin 2 homolog (Xenopus laevis) (Rspo2), mRNA [NM_172815]                                                                       | 0.54             | 0.005   | 0.150           |
| Cd200r1                                    | NM_021325                  | ref  Mus musculus CD200 receptor 1 (Cd200r1), mRNA [NM_021325]                                                                                         | 0.54             | 0.011   | 0.223           |
| chr4:15233302-15233632_R                   | chr4:15233302-15233632_R   | lincRNA:chr4:15233302-15233632 reverse strand                                                                                                          | 0.54             | 0.016   | 0.273           |
| Fgf6                                       | ENSMUST00000000187         | ens  fibroblast growth factor 6 Gene [Source:MGI Symbol;Acc:MGI:95520] [ENSMUST00000000187]                                                            | 0.54             | 0.001   | 0.066           |

| Online Supplemental Table IV: Con-STZ Only |                             |                                                                                                                                                                     |                  |         |                 |
|--------------------------------------------|-----------------------------|---------------------------------------------------------------------------------------------------------------------------------------------------------------------|------------------|---------|-----------------|
| Gene Symbol                                | RefSeq                      | Description                                                                                                                                                         | logFC<br>Con-STZ | P-value | Adj.<br>P-value |
| Arhgap27                                   | NM_133715                   | ref  Mus musculus Rho GTPase activating protein 27 (Arhgap27), transcript variant 1, mRNA [NM_133715]                                                               | 0.54             | 0.003   | 0.117           |
| Cyp2e1                                     | NM_021282                   | ref  Mus musculus cytochrome P450, family 2, subfamily e, polypeptide 1 (Cyp2e1), mRNA [NM_021282]                                                                  | 0.54             | 0.021   | 0.302           |
| chr19:6268793-6276607_R                    | chr19:6268793-6276607_R     | lincRNA:chr19:6268793-6276607 reverse strand                                                                                                                        | 0.54             | 0.041   | 0.422           |
| chr7:134603123-134614510_F                 | chr7:134603123-134614510_F  | lincRNA:chr7:134603123-134614510 forward strand                                                                                                                     | 0.53             | 0.034   | 0.385           |
| Tppp3                                      | NM_026481                   | ref  Mus musculus tubulin polymerization-promoting protein family member 3 (Tppp3), mRNA [NM_026481]                                                                | 0.53             | 0.042   | 0.422           |
| Trpv4                                      | NM_022017                   | ref  Mus musculus transient receptor potential cation channel, subfamily V, member 4 (Trpv4), mRNA [NM_022017]                                                      | 0.53             | 0.003   | 0.115           |
| chr16:45016828-45069177_F                  | chr16:45016828-45069177_F   | lincRNA:chr16:45016828-45069177 forward strand                                                                                                                      | 0.53             | 0.016   | 0.274           |
| chr10:83185606-83225506_F                  | chr10:83185606-83225506_F   | lincRNA:chr10:83185606-83225506 forward strand                                                                                                                      | 0.53             | 0.004   | 0.136           |
| chr2:126501651-126510026_F                 | chr2:126501651-126510026_F  | lincRNA:chr2:126501651-126510026 forward strand                                                                                                                     | 0.53             | 0.029   | 0.357           |
| LOC630896                                  | XR_030502                   | ref  PREDICTED: Mus musculus similar to 3-phosphoglycerate dehydrogenase (LOC630896), misc RNA [XR_030502]                                                          | 0.53             | 0.020   | 0.300           |
| AI607873                                   | XM_001479984                | ref  PREDICTED: Mus musculus expressed sequence AI607873 (AI607873), mRNA [XM_001479984]                                                                            | 0.53             | 0.006   | 0.165           |
| chr5:88995039-89009064_F                   | chr5:88995039-89009064_F    | lincRNA:chr5:88995039-89009064 forward strand                                                                                                                       | 0.53             | 0.017   | 0.279           |
| chr17:8088950-8106700_F                    | chr17:8088950-8106700_F     | lincRNA:chr17:8088950-8106700 forward strand                                                                                                                        | 0.53             | 0.021   | 0.304           |
| Adams2                                     | NM_175643                   | ref  Mus musculus a disintegrin-like and metallopeptidase (reprolysin type) with thrombospondin type 1 motif, 2 (Adams2), mRNA [NM_175643]                          | 0.53             | 0.001   | 0.066           |
| chr1:74084292-74138492_F                   | chr1:74084292-74138492_F    | lincRNA:chr1:74084292-74138492 forward strand                                                                                                                       | 0.53             | 0.031   | 0.370           |
| Myliip                                     | NM_153789                   | ref  Mus musculus myosin regulatory light chain interacting protein (Myliip), transcript variant 1, mRNA [NM_153789]                                                | 0.53             | 0.030   | 0.362           |
| Anxa8                                      | NM_013473                   | ref  Mus musculus annexin A8 (Anxa8), mRNA [NM_013473]                                                                                                              | 0.53             | 0.013   | 0.247           |
| Akap2                                      | NM_001035533                | ref  Mus musculus A kinase (PRKA) anchor protein 2 (Akap2), transcript variant 1, mRNA [NM_001035533]                                                               | 0.53             | 0.002   | 0.099           |
| Whsc1l1                                    | NM_001001735                | ref  Mus musculus Wolf-Hirschhorn syndrome candidate 1-like 1 (human) (Whsc1l1), transcript variant 1, mRNA [NM_001001735]                                          | 0.53             | 0.013   | 0.241           |
| chr10:120336296-120354471_R                | chr10:120336296-120354471_R | lincRNA:chr10:120336296-120354471 reverse strand                                                                                                                    | 0.53             | 0.029   | 0.358           |
| chrX:12443510-12444165_F                   | chrX:12443510-12444165_F    | lincRNA:chrX:12443510-12444165 forward strand                                                                                                                       | 0.53             | 0.027   | 0.347           |
| Oplah                                      | NM_153122                   | ref  Mus musculus 5-oxoprolinase (ATP-hydrolysing) (Oplah), mRNA [NM_153122]                                                                                        | 0.53             | 0.023   | 0.321           |
| Gem                                        | NM_010276                   | ref  Mus musculus GTP binding protein (gene overexpressed in skeletal muscle) (Gem), mRNA [NM_010276]                                                               | 0.53             | 0.045   | 0.439           |
| Krt222                                     | NM_172946                   | ref  Mus musculus keratin 222 (Krt222), mRNA [NM_172946]                                                                                                            | 0.53             | 0.004   | 0.133           |
| ENSMUST00000111314                         | ENSMUST00000111314          | ens  a disintegrin-like and metallopeptidase (reprolysin type) with thrombospondin type 1 motif, 4 Gene [Source:MGI (curated);Acc:MGI:1339949] [ENSMUST00000111314] | 0.52             | 0.013   | 0.246           |

| Online Supplemental Table IV: Con-STZ Only |                           |                                                                                                                                                       |                  |         |                 |
|--------------------------------------------|---------------------------|-------------------------------------------------------------------------------------------------------------------------------------------------------|------------------|---------|-----------------|
| Gene Symbol                                | RefSeq                    | Description                                                                                                                                           | logFC<br>Con-STZ | P-value | Adj.<br>P-value |
| LOC100045667                               | XM_001474717              | ref  PREDICTED: Mus musculus similar to Dopachrome tautomerase (LOC100045667), mRNA [XM_001474717]                                                    | 0.52             | 0.040   | 0.415           |
| Rcan1                                      | NM_019466                 | ref  Mus musculus regulator of calcineurin 1 (Rcan1), transcript variant 2, mRNA [NM_019466]                                                          | 0.52             | 0.002   | 0.085           |
| chr17:87674225-87682154_F                  | chr17:87674225-87682154_F | lincRNA:chr17:87674225-87682154 forward strand                                                                                                        | 0.52             | 0.022   | 0.314           |
| Oprm1                                      | NM_001039652              | ref  Mus musculus opioid receptor, mu 1 (Oprm1), mRNA [NM_001039652]                                                                                  | 0.52             | 0.005   | 0.145           |
| Frem1                                      | NM_177863                 | ref  Mus musculus Fras1 related extracellular matrix protein 1 (Frem1), mRNA [NM_177863]                                                              | 0.52             | 0.031   | 0.370           |
| Evpl                                       | NM_025276                 | ref  Mus musculus envoplakin (Evpl), mRNA [NM_025276]                                                                                                 | 0.52             | 0.000   | 0.037           |
| Kalrn                                      | NM_001164268              | ref  Mus musculus kalirin, RhoGEF kinase (Kalrn), transcript variant 2, mRNA [NM_001164268]                                                           | 0.52             | 0.041   | 0.421           |
| Ecm1                                       | NM_007899                 | ref  Mus musculus extracellular matrix protein 1 (Ecm1), mRNA [NM_007899]                                                                             | 0.52             | 0.003   | 0.109           |
| chr19:5771425-5848475_R                    | chr19:5771425-5848475_R   | lincRNA:chr19:5771425-5848475 reverse strand                                                                                                          | 0.52             | 0.008   | 0.190           |
| Gprc5b                                     | NM_022420                 | ref  Mus musculus G protein-coupled receptor, family C, group 5, member B (Gprc5b), mRNA [NM_022420]                                                  | 0.52             | 0.002   | 0.100           |
| Smarca1                                    | NM_053123                 | ref  Mus musculus SWI/SNF related, matrix associated, actin dependent regulator of chromatin, subfamily a, member 1 (Smarca1), mRNA [NM_053123]       | 0.52             | 0.028   | 0.353           |
| Serpina3f                                  | NM_001168294              | ref  Mus musculus serine (or cysteine) peptidase inhibitor, clade A, member 3F (Serpina3f), transcript variant 1, mRNA [NM_001168294]                 | 0.52             | 0.008   | 0.191           |
| Fam19a1                                    | NM_182808                 | ref  Mus musculus family with sequence similarity 19, member A1 (Fam19a1), mRNA [NM_182808]                                                           | 0.52             | 0.021   | 0.303           |
| Pdcd4                                      | NM_011050                 | ref  Mus musculus programmed cell death 4 (Pdcd4), transcript variant 1, mRNA [NM_011050]                                                             | 0.52             | 0.004   | 0.131           |
| Gstm3                                      | NM_010359                 | ref  Mus musculus glutathione S-transferase, mu 3 (Gstm3), mRNA [NM_010359]                                                                           | 0.52             | 0.022   | 0.316           |
| Gm3901                                     | XM_001477028              | ref  PREDICTED: Mus musculus hypothetical protein LOC100046896 (LOC100046896), mRNA [XM_001477028]                                                    | 0.52             | 0.033   | 0.380           |
| E330020D12Rik                              | NR_033736                 | ref  Mus musculus Riken cDNA E330020D12 gene (E330020D12Rik), non-coding RNA [NR_033736]                                                              | 0.52             | 0.025   | 0.332           |
| Ocln                                       | NM_008756                 | ref  Mus musculus occludin (Ocln), mRNA [NM_008756]                                                                                                   | 0.52             | 0.011   | 0.227           |
| ENSMUST00000050395                         | ENSMUST00000050395        | ens  RIKEN cDNA 1700040F17 gene Gene [Source:MGI Symbol;Acc:MGI:1920584] [ENSMUST00000050395]                                                         | 0.52             | 0.005   | 0.147           |
| chr10:83181374-83249774_F                  | chr10:83181374-83249774_F | lincRNA:chr10:83181374-83249774 forward strand                                                                                                        | 0.52             | 0.007   | 0.182           |
| Jdp2                                       | NM_030887                 | ref  Mus musculus Jun dimerization protein 2 (Jdp2), mRNA [NM_030887]                                                                                 | 0.52             | 0.005   | 0.154           |
| Gm7669                                     | XR_031967                 | ref  PREDICTED: Mus musculus similar to 3-phosphoglycerate dehydrogenase (LOC665516), misc RNA [XR_031967]                                            | 0.52             | 0.003   | 0.108           |
| Olig1                                      | NM_016968                 | ref  Mus musculus oligodendrocyte transcription factor 1 (Olig1), mRNA [NM_016968]                                                                    | 0.52             | 0.011   | 0.225           |
| Gm12229                                    | XR_032858                 | ref  PREDICTED: Mus musculus similar to heterogeneous nuclear ribonucleoprotein A3 (LOC677786), misc RNA [XR_032858]                                  | 0.52             | 0.044   | 0.432           |
| ENSMUST00000109328                         | ENSMUST00000109328        | ens  WAP four-disulfide core domain 3 Gene [Source:MGI (curated);Acc:MGI:1923897] [ENSMUST00000109328]                                                | 0.52             | 0.024   | 0.326           |
| LOC100045064                               | XR_031053                 | ref  PREDICTED: Mus musculus similar to Selenium-binding protein 2 (56 kDa acetaminophen-binding protein) (AP56) (LOC100045064), misc RNA [XR_031053] | 0.52             | 0.029   | 0.356           |
| Phgdh                                      | NM_016966                 | ref  Mus musculus 3-phosphoglycerate dehydrogenase (Phgdh), mRNA [NM_016966]                                                                          | 0.52             | 0.006   | 0.170           |

Online Supplemental Table IV: Con-STZ Only

| Gene Symbol               | RefSeq                    | Description                                                                                                                                            | logFC<br>Con-STZ | P-value | Adj.<br>P-value |
|---------------------------|---------------------------|--------------------------------------------------------------------------------------------------------------------------------------------------------|------------------|---------|-----------------|
| Ptpru                     | NM_001083119              | ref  Mus musculus protein tyrosine phosphatase, receptor type, U (Ptpru), transcript variant 2, mRNA [NM_001083119]                                    | 0.51             | 0.018   | 0.283           |
| Gm5834                    | XM_619677                 | ref  PREDICTED: Mus musculus predicted gene, EG545367 (EG545367), mRNA [XM_619677]                                                                     | 0.51             | 0.007   | 0.181           |
| Itgbl1                    | NM_145467                 | ref  Mus musculus integrin, beta-like 1 (Itgbl1), mRNA [NM_145467]                                                                                     | 0.51             | 0.008   | 0.183           |
| Skint4                    | NM_178786                 | ref  Mus musculus selection and upkeep of intraepithelial T cells 4 (Skint4), mRNA [NM_178786]                                                         | 0.51             | 0.009   | 0.201           |
| Csmd3                     | NM_001081391              | ref  Mus musculus CUB and Sushi multiple domains 3 (Csmd3), mRNA [NM_001081391]                                                                        | 0.51             | 0.044   | 0.431           |
| Cpt1a                     | NM_013495                 | ref  Mus musculus carnitine palmitoyltransferase 1a, liver (Cpt1a), nuclear gene encoding mitochondrial protein, mRNA [NM_013495]                      | 0.51             | 0.001   | 0.073           |
| Mfge8                     | NM_008594                 | ref  Mus musculus milk fat globule-EGF factor 8 protein (Mfge8), transcript variant 1, mRNA [NM_008594]                                                | 0.51             | 0.000   | 0.043           |
| ENSMUST00000105157        | ENSMUST00000105157        | ens  RIKEN cDNA 4933409K07 gene Gene [Source:MGI Symbol;Acc:MGI:1918429] [ENSMUST00000105157]                                                          | 0.51             | 0.032   | 0.374           |
| chr12:5303823-5379098_F   | chr12:5303823-5379098_F   | lincRNA:chr12:5303823-5379098 forward strand                                                                                                           | 0.51             | 0.004   | 0.129           |
| chr1:87374975-87412500_F  | chr1:87374975-87412500_F  | lincRNA:chr1:87374975-87412500 forward strand                                                                                                          | 0.51             | 0.048   | 0.452           |
| Slc41a2                   | NM_177388                 | ref  Mus musculus solute carrier family 41, member 2 (Slc41a2), mRNA [NM_177388]                                                                       | 0.51             | 0.005   | 0.145           |
| Gm4013                    | NR_033452                 | ref  Mus musculus predicted gene 4013 (Gm4013), non-coding RNA [NR_033452]                                                                             | 0.51             | 0.005   | 0.145           |
| Asphd2                    | NM_028386                 | ref  Mus musculus aspartate beta-hydroxylase domain containing 2 (Asphd2), mRNA [NM_028386]                                                            | 0.51             | 0.001   | 0.066           |
| Fam159b                   | NM_029984                 | ref  Mus musculus family with sequence similarity 159, member B (Fam159b), mRNA [NM_029984]                                                            | 0.51             | 0.041   | 0.419           |
| 6030408B16Rik             | NR_033803                 | ref  Mus musculus RIKEN cDNA 6030408B16 gene (6030408B16Rik), non-coding RNA [NR_033803]                                                               | 0.51             | 0.002   | 0.096           |
| Aqp7                      | NM_007473                 | ref  Mus musculus aquaporin 7 (Aqp7), mRNA [NM_007473]                                                                                                 | 0.51             | 0.001   | 0.063           |
| Mark1                     | NM_145515                 | ref  Mus musculus MAP/microtubule affinity-regulating kinase 1 (Mark1), mRNA [NM_145515]                                                               | 0.51             | 0.003   | 0.114           |
| Pmaip1                    | NM_021451                 | ref  Mus musculus phorbol-12-myristate-13-acetate-induced protein 1 (Pmaip1), mRNA [NM_021451]                                                         | 0.51             | 0.011   | 0.228           |
| chr14:8792433-8792567_F   | chr14:8792433-8792567_F   | lincRNA:chr14:8792433-8792567 forward strand                                                                                                           | 0.51             | 0.012   | 0.234           |
| chr18:63226635-63227111_R | chr18:63226635-63227111_R | lincRNA:chr18:63226635-63227111 reverse strand                                                                                                         | 0.50             | 0.043   | 0.428           |
| 4933404I11Rik             | AK016650                  | gb  Mus musculus adult male testis cDNA, RIKEN full-length enriched library, clone:4933404I11 product:unclassifiable, full insert sequence. [AK016650] | 0.50             | 0.036   | 0.393           |
| ENSMUST00000028543        | ENSMUST00000028543        | ens  cDNA sequence BC006965 (BC006965), non-coding RNA [Source:RefSeq DNA;Acc:NR_024085] [ENSMUST00000028543]                                          | 0.50             | 0.002   | 0.082           |
| Pign                      | NM_013784                 | ref  Mus musculus phosphatidylinositol glycan anchor biosynthesis, class N (Pign), mRNA [NM_013784]                                                    | 0.50             | 0.014   | 0.253           |
| Ecm1                      | NM_007899                 | ref  Mus musculus extracellular matrix protein 1 (Ecm1), mRNA [NM_007899]                                                                              | 0.50             | 0.008   | 0.190           |
| Ncf1                      | NM_010876                 | ref  Mus musculus neutrophil cytosolic factor 1 (Ncf1), mRNA [NM_010876]                                                                               | 0.50             | 0.003   | 0.117           |
| Pdgfrl                    | NM_026840                 | ref  Mus musculus platelet-derived growth factor receptor-like (Pdgfrl), mRNA [NM_026840]                                                              | 0.50             | 0.027   | 0.348           |
| Lmod2                     | NM_053098                 | ref  Mus musculus leiomodien 2 (cardiac) (Lmod2), mRNA [NM_053098]                                                                                     | 0.50             | 0.005   | 0.146           |

| Online Supplemental Table IV: Con-STZ Only |                            |                                                                                                                                                                |                  |         |                 |
|--------------------------------------------|----------------------------|----------------------------------------------------------------------------------------------------------------------------------------------------------------|------------------|---------|-----------------|
| Gene Symbol                                | RefSeq                     | Description                                                                                                                                                    | logFC<br>Con-STZ | P-value | Adj.<br>P-value |
| Usp54                                      | NM_030180                  | ref  Mus musculus ubiquitin specific peptidase 54 (Usp54), mRNA [NM_030180]                                                                                    | 0.50             | 0.012   | 0.238           |
| Slc17a5                                    | NM_172773                  | ref  Mus musculus solute carrier family 17 (anion/sugar transporter), member 5 (Slc17a5), mRNA [NM_172773]                                                     | 0.50             | 0.002   | 0.093           |
| LOC637118                                  | XR_032862                  | ref  PREDICTED: Mus musculus similar to 5-adenosylmethionine decarboxylase (LOC637118), misc RNA [XR_032862]                                                   | 0.50             | 0.005   | 0.145           |
| Uck2                                       | NM_030724                  | ref  Mus musculus uridine-cytidine kinase 2 (Uck2), mRNA [NM_030724]                                                                                           | 0.50             | 0.001   | 0.056           |
| Acp5                                       | NM_001102405               | ref  Mus musculus acid phosphatase 5, tartrate resistant (Acp5), transcript variant 1, mRNA [NM_001102405]                                                     | 0.50             | 0.018   | 0.281           |
| A530030E21Rik                              | AK079970                   | gb  Mus musculus adult male aorta and vein cDNA, RIKEN full-length enriched library, clone:A530030E21 product:unclassifiable, full insert sequence. [AK079970] | 0.50             | 0.001   | 0.075           |
| Tes                                        | NM_207176                  | ref  Mus musculus testis derived transcript (Tes), mRNA [NM_207176]                                                                                            | 0.50             | 0.015   | 0.260           |
| Cyp7b1                                     | NM_007825                  | ref  Mus musculus cytochrome P450, family 7, subfamily b, polypeptide 1 (Cyp7b1), mRNA [NM_007825]                                                             | 0.50             | 0.031   | 0.368           |
| Srpx2                                      | NM_026838                  | ref  Mus musculus sushi-repeat-containing protein, X-linked 2 (Srpx2), transcript variant 1, mRNA [NM_026838]                                                  | 0.50             | 0.001   | 0.057           |
| Lancl3                                     | NM_173414                  | ref  Mus musculus LanC lantibiotic synthetase component C-like 3 (bacterial) (Lancl3), mRNA [NM_173414]                                                        | 0.50             | 0.042   | 0.425           |
| Gapt                                       | NM_177713                  | ref  Mus musculus Grb2-binding adaptor, transmembrane (Gapt), mRNA [NM_177713]                                                                                 | 0.50             | 0.037   | 0.396           |
| Osgin1                                     | NM_027950                  | ref  Mus musculus oxidative stress induced growth inhibitor 1 (Osgin1), mRNA [NM_027950]                                                                       | 0.50             | 0.016   | 0.272           |
| Lyz2                                       | NM_017372                  | ref  Mus musculus lysozyme 2 (Lyz2), mRNA [NM_017372]                                                                                                          | 0.50             | 0.018   | 0.284           |
| Pdzn3                                      | NM_018884                  | ref  Mus musculus PDZ domain containing RING finger 3 (Pdzn3), mRNA [NM_018884]                                                                                | 0.50             | 0.003   | 0.115           |
| Sacs                                       | NM_172809                  | ref  Mus musculus saccin (Sacs), mRNA [NM_172809]                                                                                                              | 0.50             | 0.007   | 0.179           |
| Snap25                                     | NM_011428                  | ref  Mus musculus synaptosomal-associated protein 25 (Snap25), mRNA [NM_011428]                                                                                | 0.50             | 0.001   | 0.071           |
| Plp2                                       | ENSMUST00000033486         | ens  proteolipid protein 2 Gene [Source:MGI (curated);Acc:MGI:1298382] [ENSMUST00000033486]                                                                    | 0.50             | 0.000   | 0.041           |
| chr1:175653557-175671940_R                 | chr1:175653557-175671940_R | lincRNA:chr1:175653557-175671940 reverse strand                                                                                                                | 0.50             | 0.001   | 0.065           |
| 5730416F02Rik                              | NR_033596                  | ref  Mus musculus RIKEN cDNA 5730416F02 gene (5730416F02Rik), non-coding RNA [NR_033596]                                                                       | 0.50             | 0.003   | 0.117           |
| Lgals6                                     | NM_010707                  | ref  Mus musculus lectin, galactose binding, soluble 6 (Lgals6), mRNA [NM_010707]                                                                              | 0.50             | 0.028   | 0.352           |
| Dmd                                        | NM_007868                  | ref  Mus musculus dystrophin, muscular dystrophy (Dmd), mRNA [NM_007868]                                                                                       | 0.50             | 0.020   | 0.301           |
| Olf847                                     | NM_146525                  | ref  Mus musculus olfactory receptor 847 (Olf847), mRNA [NM_146525]                                                                                            | 0.49             | 0.032   | 0.372           |
| D630010B17Rik                              | XM_001480529               | ref  PREDICTED: Mus musculus RIKEN cDNA D630010B17 gene (D630010B17Rik), mRNA [XM_001480529]                                                                   | 0.49             | 0.039   | 0.411           |
| Klf4                                       | NM_010637                  | ref  Mus musculus Kruppel-like factor 4 (gut) (Klf4), mRNA [NM_010637]                                                                                         | 0.49             | 0.001   | 0.070           |
| chr13:83867711-83878140_R                  | chr13:83867711-83878140_R  | lincRNA:chr13:83867711-83878140 reverse strand                                                                                                                 | 0.49             | 0.015   | 0.260           |
| Scx                                        | NM_198885                  | ref  Mus musculus scleraxis (Scx), mRNA [NM_198885]                                                                                                            | 0.49             | 0.011   | 0.222           |
| Ednra                                      | NM_010332                  | ref  Mus musculus endothelin receptor type A (Ednra), mRNA [NM_010332]                                                                                         | 0.49             | 0.010   | 0.209           |
| Atp6v0d2                                   | NM_175406                  | ref  Mus musculus ATPase, H+ transporting, lysosomal V0 subunit D2 (Atp6v0d2), mRNA [NM_175406]                                                                | 0.49             | 0.015   | 0.264           |
| Dnahc10                                    | NM_019536                  | ref  Mus musculus dynein, axonemal, heavy chain 10 (Dnahc10), mRNA [NM_019536]                                                                                 | 0.49             | 0.017   | 0.280           |
| Emilin1                                    | NM_133918                  | ref  Mus musculus elastin microfibril interfacer 1 (Emilin1), mRNA [NM_133918]                                                                                 | 0.49             | 0.028   | 0.348           |

| Online Supplemental Table IV: Con-STZ Only |                             |                                                                                                                                                                                                     |                  |         |                 |
|--------------------------------------------|-----------------------------|-----------------------------------------------------------------------------------------------------------------------------------------------------------------------------------------------------|------------------|---------|-----------------|
| Gene Symbol                                | RefSeq                      | Description                                                                                                                                                                                         | logFC<br>Con-STZ | P-value | Adj.<br>P-value |
| chr5:22801058-22939737_R                   | chr5:22801058-22939737_R    | lincRNA:chr5:22801058-22939737 reverse strand                                                                                                                                                       | 0.49             | 0.047   | 0.446           |
| 9430018G01Rik                              | AK034646                    | gb Mus musculus 12 days embryo embryonic body between diaphragm region and neck cDNA, RIKEN full-length enriched library, clone:9430018G01 product:unclassifiable, full insert sequence. [AK034646] | 0.49             | 0.033   | 0.376           |
| Trpv4                                      | NM_022017                   | ref Mus musculus transient receptor potential cation channel, subfamily V, member 4 (Trpv4), mRNA [NM_022017]                                                                                       | 0.49             | 0.013   | 0.244           |
| Hpse2                                      | NM_001081257                | ref Mus musculus heparanase 2 (Hpse2), mRNA [NM_001081257]                                                                                                                                          | 0.49             | 0.006   | 0.156           |
| chr7:88131123-88136898_R                   | chr7:88131123-88136898_R    | lincRNA:chr7:88131123-88136898 reverse strand                                                                                                                                                       | 0.49             | 0.043   | 0.428           |
| chr18:61781410-61788685_R                  | chr18:61781410-61788685_R   | lincRNA:chr18:61781410-61788685 reverse strand                                                                                                                                                      | 0.49             | 0.022   | 0.310           |
| chr13:113555055-113564665_F                | chr13:113555055-113564665_F | lincRNA:chr13:113555055-113564665 forward strand                                                                                                                                                    | 0.49             | 0.013   | 0.240           |
| Capg                                       | NM_007599                   | ref Mus musculus capping protein (actin filament), gelsolin-like (Capg), transcript variant 1, mRNA [NM_007599]                                                                                     | 0.49             | 0.002   | 0.094           |
| chr7:66570691-66573827_R                   | chr7:66570691-66573827_R    | lincRNA:chr7:66570691-66573827 reverse strand                                                                                                                                                       | 0.49             | 0.028   | 0.351           |
| chr15:59966962-59972812_R                  | chr15:59966962-59972812_R   | lincRNA:chr15:59966962-59972812 reverse strand                                                                                                                                                      | 0.49             | 0.001   | 0.060           |
| Elmod1                                     | NM_177769                   | ref Mus musculus ELMO domain containing 1 (Elmod1), mRNA [NM_177769]                                                                                                                                | 0.49             | 0.026   | 0.340           |
| Dnahc6                                     | NM_001164669                | ref Mus musculus dynein, axonemal, heavy chain 6 (Dnahc6), mRNA [NM_001164669]                                                                                                                      | 0.49             | 0.003   | 0.113           |
| 4933406G16Rik                              | AK016692                    | gb Mus musculus adult male testis cDNA, RIKEN full-length enriched library, clone:4933406G16 product:unclassifiable, full insert sequence. [AK016692]                                               | 0.49             | 0.016   | 0.267           |
| Lrp8                                       | NM_001080926                | ref Mus musculus low density lipoprotein receptor-related protein 8, apolipoprotein e receptor (Lrp8), transcript variant 2, mRNA [NM_001080926]                                                    | 0.49             | 0.038   | 0.405           |
| Atp10b                                     | NM_176999                   | ref Mus musculus ATPase, class V, type 10B (Atp10b), mRNA [NM_176999]                                                                                                                               | 0.49             | 0.049   | 0.455           |
| Olf502                                     | NM_146739                   | ref Mus musculus olfactory receptor 502 (Olf502), mRNA [NM_146739]                                                                                                                                  | 0.49             | 0.022   | 0.310           |
| Ttc9                                       | NM_001033149                | ref Mus musculus tetratricopeptide repeat domain 9 (Ttc9), mRNA [NM_001033149]                                                                                                                      | 0.49             | 0.043   | 0.427           |
| Tectb                                      | NM_009348                   | ref Mus musculus tectorin beta (Tectb), mRNA [NM_009348]                                                                                                                                            | 0.49             | 0.031   | 0.367           |
| Atoh8                                      | NM_153778                   | ref Mus musculus atonal homolog 8 (Drosophila) (Atoh8), mRNA [NM_153778]                                                                                                                            | 0.49             | 0.009   | 0.204           |
| Slc7a5                                     | NM_011404                   | ref Mus musculus solute carrier family 7 (cationic amino acid transporter, y+ system), member 5 (Slc7a5), mRNA [NM_011404]                                                                          | 0.49             | 0.011   | 0.222           |
| Loxl1                                      | NM_010729                   | ref Mus musculus lysyl oxidase-like 1 (Loxl1), mRNA [NM_010729]                                                                                                                                     | 0.49             | 0.025   | 0.333           |
| chr2:117024098-117025009_R                 | chr2:117024098-117025009_R  | lincRNA:chr2:117024098-117025009 reverse strand                                                                                                                                                     | 0.48             | 0.014   | 0.258           |
| Anxa1                                      | NM_010730                   | ref Mus musculus annexin A1 (Anxa1), mRNA [NM_010730]                                                                                                                                               | 0.48             | 0.000   | 0.042           |
| Olf963                                     | NM_001011827                | ref Mus musculus olfactory receptor 963 (Olf963), mRNA [NM_001011827]                                                                                                                               | 0.48             | 0.016   | 0.271           |
| S100a10                                    | NM_009112                   | ref Mus musculus S100 calcium binding protein A10 (calpactin) (S100a10), mRNA [NM_009112]                                                                                                           | 0.48             | 0.002   | 0.096           |
| Cd84                                       | NM_013489                   | ref Mus musculus CD84 antigen (Cd84), mRNA [NM_013489]                                                                                                                                              | 0.48             | 0.035   | 0.388           |



| Online Supplemental Table IV: Con-STZ Only |                            |                                                                                                                                       |                      |         |                 |
|--------------------------------------------|----------------------------|---------------------------------------------------------------------------------------------------------------------------------------|----------------------|---------|-----------------|
| Gene Symbol                                | RefSeq                     | Description                                                                                                                           | logFC<br>Con-<br>STZ | P-value | Adj.<br>P-value |
| Loxl1                                      | NM_010729                  | ref  Mus musculus lysyl oxidase-like 1 (Loxl1), mRNA [NM_010729]                                                                      | 0.48                 | 0.026   | 0.341           |
| Inpp4b                                     | NM_001024617               | ref  Mus musculus inositol polyphosphate-4-phosphatase, type II (Inpp4b), mRNA [NM_001024617]                                         | 0.48                 | 0.001   | 0.077           |
| Wbscr27                                    | NM_024479                  | ref  Mus musculus Williams Beuren syndrome chromosome region 27 (human) (Wbscr27), mRNA [NM_024479]                                   | 0.48                 | 0.004   | 0.126           |
| chr1:167797581-167803031_F                 | chr1:167797581-167803031_F | lincRNA:chr1:167797581-167803031 forward strand                                                                                       | 0.48                 | 0.046   | 0.444           |
| B4galnt3                                   | NM_198884                  | ref  Mus musculus beta-1,4-N-acetyl-galactosaminyl transferase 3 (B4galnt3), mRNA [NM_198884]                                         | 0.48                 | 0.015   | 0.263           |
| Cd300lb                                    | NM_199221                  | ref  Mus musculus CD300 antigen like family member B (Cd300lb), mRNA [NM_199221]                                                      | 0.48                 | 0.005   | 0.145           |
| Clec1a                                     | NM_175526                  | ref  Mus musculus C-type lectin domain family 1, member a (Clec1a), mRNA [NM_175526]                                                  | 0.48                 | 0.024   | 0.323           |
| chr3:26982754-26983352_R                   | chr3:26982754-26983352_R   | lincRNA:chr3:26982754-26983352 reverse strand                                                                                         | 0.48                 | 0.042   | 0.425           |
| Idua                                       | NM_008325                  | ref  Mus musculus iduronidase, alpha-L- (Idua), mRNA [NM_008325]                                                                      | 0.48                 | 0.001   | 0.046           |
| Mcf2l                                      | NM_001159486               | ref  Mus musculus mcf.2 transforming sequence-like (Mcf2l), transcript variant 2, mRNA [NM_001159486]                                 | 0.48                 | 0.038   | 0.404           |
| Mertk                                      | NM_008587                  | ref  Mus musculus c-mer proto-oncogene tyrosine kinase (Mertk), mRNA [NM_008587]                                                      | 0.48                 | 0.019   | 0.290           |
| Sprr2a2                                    | NM_001164787               | ref  Mus musculus small proline-rich protein 2A2 (Sprr2a2), mRNA [NM_001164787]                                                       | 0.48                 | 0.023   | 0.316           |
| chr12:15774073-15777144_R                  | chr12:15774073-15777144_R  | lincRNA:chr12:15774073-15777144 reverse strand                                                                                        | 0.48                 | 0.029   | 0.359           |
| Sulf1                                      | NM_172294                  | ref  Mus musculus sulfatase 1 (Sulf1), mRNA [NM_172294]                                                                               | 0.48                 | 0.001   | 0.059           |
| Apba1                                      | NM_177034                  | ref  Mus musculus amyloid beta (A4) precursor protein binding, family A, member 1 (Apba1), mRNA [NM_177034]                           | 0.48                 | 0.008   | 0.192           |
| ENSMUST00000104915                         | ENSMUST00000104915         | ens  Putative uncharacterized protein [Source:UniProtKB/TrEMBL;Acc:Q8C4B7] [ENSMUST00000104915]                                       | 0.48                 | 0.037   | 0.399           |
| Qpct                                       | NM_027455                  | ref  Mus musculus glutaminyl-peptide cyclotransferase (glutaminyl cyclase) (Qpct), mRNA [NM_027455]                                   | 0.47                 | 0.000   | 0.040           |
| 1700007E06Rik                              | NM_001162880               | ref  Mus musculus RIKEN cDNA 1700007E06 gene (1700007E06Rik), transcript variant 1, mRNA [NM_001162880]                               | 0.47                 | 0.029   | 0.356           |
| Ric3                                       | NM_001038624               | ref  Mus musculus resistance to inhibitors of cholinesterase 3 homolog (C. elegans) (Ric3), transcript variant 1, mRNA [NM_001038624] | 0.47                 | 0.039   | 0.411           |
| chr3:51784862-51793999_F                   | chr3:51784862-51793999_F   | lincRNA:chr3:51784862-51793999 forward strand                                                                                         | 0.47                 | 0.033   | 0.376           |
| chr18:61784800-61785170_F                  | chr18:61784800-61785170_F  | lincRNA:chr18:61784800-61785170 forward strand                                                                                        | 0.47                 | 0.018   | 0.282           |
| Dfna5                                      | NM_018769                  | ref  Mus musculus deafness, autosomal dominant 5 (human) (Dfna5), mRNA [NM_018769]                                                    | 0.47                 | 0.039   | 0.411           |
| Ctsk                                       | NM_007802                  | ref  Mus musculus cathepsin K (Ctsk), mRNA [NM_007802]                                                                                | 0.47                 | 0.015   | 0.259           |
| chr16:40467818-40468474_F                  | chr16:40467818-40468474_F  | lincRNA:chr16:40467818-40468474 forward strand                                                                                        | 0.47                 | 0.047   | 0.447           |
| chr8:67542714-67561694_F                   | chr8:67542714-67561694_F   | lincRNA:chr8:67542714-67561694 forward strand                                                                                         | 0.47                 | 0.046   | 0.444           |
| chr11:6421951-6429173_F                    | chr11:6421951-6429173_F    | lincRNA:chr11:6421951-6429173 forward strand                                                                                          | 0.47                 | 0.014   | 0.250           |
| Crip3                                      | NM_053250                  | ref  Mus musculus cysteine-rich protein 3 (Crip3), transcript variant TLP-B, mRNA [NM_053250]                                         | 0.47                 | 0.015   | 0.261           |
| ENSMUST00000087384                         | ENSMUST00000087384         | ens  sphingomyelin synthase 1 Gene [Source:MGI (curated);Acc: MGI:2444110] [ENSMUST00000087384]                                       | 0.47                 | 0.036   | 0.393           |

| Online Supplemental Table IV: Con-STZ Only |                            |                                                                                                                                              |                  |         |                 |
|--------------------------------------------|----------------------------|----------------------------------------------------------------------------------------------------------------------------------------------|------------------|---------|-----------------|
| Gene Symbol                                | RefSeq                     | Description                                                                                                                                  | logFC<br>Con-STZ | P-value | Adj.<br>P-value |
| LOC620515                                  | XM_884904                  | ref  PREDICTED: Mus musculus similar to secretory protein (LOC620515), mRNA [XM_884904]                                                      | 0.47             | 0.017   | 0.280           |
| Atf4                                       | NM_009716                  | ref  Mus musculus activating transcription factor 4 (Atf4), mRNA [NM_009716]                                                                 | 0.47             | 0.001   | 0.069           |
| Fgf23                                      | NM_022657                  | ref  Mus musculus fibroblast growth factor 23 (Fgf23), mRNA [NM_022657]                                                                      | 0.47             | 0.001   | 0.051           |
| Gm5914                                     | XM_622446                  | ref  PREDICTED: Mus musculus hypothetical LOC546100 (LOC546100), mRNA [XM_622446]                                                            | 0.47             | 0.005   | 0.145           |
| Snap23                                     | NM_001177792               | ref  Mus musculus synaptosomal-associated protein 23 (Snap23), transcript variant 1, mRNA [NM_001177792]                                     | 0.47             | 0.005   | 0.155           |
| Slc16a6                                    | NM_001029842               | ref  Mus musculus solute carrier family 16 (monocarboxylic acid transporters), member 6 (Slc16a6), transcript variant 1, mRNA [NM_001029842] | 0.47             | 0.016   | 0.273           |
| Gm13011                                    | NM_001126318               | ref  Mus musculus predicted gene 13011 (Gm13011), mRNA [NM_001126318]                                                                        | 0.47             | 0.007   | 0.170           |
| Slc43a1                                    | NM_001081349               | ref  Mus musculus solute carrier family 43, member 1 (Slc43a1), transcript variant 1, mRNA [NM_001081349]                                    | 0.47             | 0.006   | 0.167           |
| Itgam                                      | NM_001082960               | ref  Mus musculus integrin alpha M (Itgam), transcript variant 1, mRNA [NM_001082960]                                                        | 0.47             | 0.001   | 0.058           |
| ENSMUST00000090710                         | ENSMUST00000090710         | ens  olfactory receptor 1140 Gene [Source:MGI (curated);Acc:MGI:3030974] [ENSMUST00000090710]                                                | 0.47             | 0.016   | 0.271           |
| Sulf1                                      | NM_172294                  | ref  Mus musculus sulfatase 1 (Sulf1), mRNA [NM_172294]                                                                                      | 0.47             | 0.001   | 0.069           |
| ENSMUST00000043406                         | ENSMUST00000043406         | ens  NADPH oxidase 4 Gene [Source:MGI (curated);Acc:MGI:1354184] [ENSMUST00000043406]                                                        | 0.47             | 0.030   | 0.364           |
| Zc3h6                                      | NM_178404                  | ref  Mus musculus zinc finger CCCH type containing 6 (Zc3h6), mRNA [NM_178404]                                                               | 0.47             | 0.031   | 0.369           |
| chr15:32167516-32174417_R                  | chr15:32167516-32174417_R  | lincRNA:chr15:32167516-32174417 reverse strand                                                                                               | 0.47             | 0.005   | 0.145           |
| Gm9252                                     | XR_031621                  | ref  PREDICTED: Mus musculus similar to Phosphoglycerate dehydrogenase (LOC677380), misc RNA [XR_031621]                                     | 0.46             | 0.012   | 0.230           |
| Filip1                                     | NM_001081243               | ref  Mus musculus filamin A interacting protein 1 (Filip1), mRNA [NM_001081243]                                                              | 0.46             | 0.002   | 0.091           |
| chr1:193048332-193049714_F                 | chr1:193048332-193049714_F | lincRNA:chr1:193048332-193049714 forward strand                                                                                              | 0.46             | 0.004   | 0.127           |
| chr7:30645026-30667034_R                   | chr7:30645026-30667034_R   | lincRNA:chr7:30645026-30667034 reverse strand                                                                                                | 0.46             | 0.045   | 0.441           |
| Lrrn4cl                                    | NM_001013019               | ref  Mus musculus LRRN4 C-terminal like (Lrrn4cl), mRNA [NM_001013019]                                                                       | 0.46             | 0.014   | 0.253           |
| Tob2                                       | NM_020507                  | ref  Mus musculus transducer of ERBB2, 2 (Tob2), mRNA [NM_020507]                                                                            | 0.46             | 0.038   | 0.402           |
| Acsm5                                      | NM_178758                  | ref  Mus musculus acyl-CoA synthetase medium-chain family member 5 (Acsm5), mRNA [NM_178758]                                                 | 0.46             | 0.044   | 0.434           |
| Cfh                                        | NM_009888                  | ref  Mus musculus complement component factor h (Cfh), mRNA [NM_009888]                                                                      | 0.46             | 0.006   | 0.160           |
| Gpr182                                     | NM_007412                  | ref  Mus musculus G protein-coupled receptor 182 (Gpr182), mRNA [NM_007412]                                                                  | 0.46             | 0.000   | 0.036           |
| Acsm4                                      | NM_178414                  | ref  Mus musculus acyl-CoA synthetase medium-chain family member 4 (Acsm4), mRNA [NM_178414]                                                 | 0.46             | 0.004   | 0.139           |
| Olf642                                     | NM_146329                  | ref  Mus musculus olfactory receptor 642 (Olf642), mRNA [NM_146329]                                                                          | 0.46             | 0.006   | 0.163           |
| St8sia1                                    | NM_011374                  | ref  Mus musculus ST8 alpha-N-acetyl-neuraminide alpha-2,8-sialyltransferase 1 (St8sia1), mRNA [NM_011374]                                   | 0.46             | 0.017   | 0.276           |
| Slc16a6                                    | NM_001029842               | ref  Mus musculus solute carrier family 16 (monocarboxylic acid transporters), member 6 (Slc16a6), transcript variant 1, mRNA [NM_001029842] | 0.46             | 0.010   | 0.212           |
| Aldh3b2                                    | NM_001177438               | ref  Mus musculus aldehyde dehydrogenase 3 family, member B2 (Aldh3b2), mRNA [NM_001177438]                                                  | 0.46             | 0.020   | 0.301           |

| Online Supplemental Table IV: Con-STZ Only |                            |                                                                                                                                                               |                  |         |                 |
|--------------------------------------------|----------------------------|---------------------------------------------------------------------------------------------------------------------------------------------------------------|------------------|---------|-----------------|
| Gene Symbol                                | RefSeq                     | Description                                                                                                                                                   | logFC<br>Con-STZ | P-value | Adj.<br>P-value |
| Gm6320                                     | NM_001037914               | ref  Mus musculus predicted gene 6320 (Gm6320), mRNA [NM_001037914]                                                                                           | 0.46             | 0.001   | 0.069           |
| 4930412L05Rik                              | AK141187                   | gb  Mus musculus 0 day neonate cerebellum cDNA, RIKEN full-length enriched library, clone:C230090D07 product:unclassifiable, full insert sequence. [AK141187] | 0.46             | 0.007   | 0.179           |
| chr4:128207615-128242898_F                 | chr4:128207615-128242898_F | lincRNA:chr4:128207615-128242898 forward strand                                                                                                               | 0.46             | 0.048   | 0.449           |
| chr16:9129538-9137898_F                    | chr16:9129538-9137898_F    | lincRNA:chr16:9129538-9137898 forward strand                                                                                                                  | 0.46             | 0.043   | 0.429           |
| LOC641025                                  | XM_001472178               | ref  PREDICTED: Mus musculus similar to Ig alpha-chain precursor (V139-D-J1) (LOC641025), mRNA [XM_001472178]                                                 | 0.46             | 0.015   | 0.260           |
| Ccl3                                       | NM_011337                  | ref  Mus musculus chemokine (C-C motif) ligand 3 (Ccl3), mRNA [NM_011337]                                                                                     | 0.46             | 0.047   | 0.449           |
| Abca7                                      | NM_013850                  | ref  Mus musculus ATP-binding cassette, sub-family A (ABC1), member 7 (Abca7), mRNA [NM_013850]                                                               | 0.46             | 0.005   | 0.145           |
| Gdf6                                       | NM_013526                  | ref  Mus musculus growth differentiation factor 6 (Gdf6), mRNA [NM_013526]                                                                                    | 0.46             | 0.034   | 0.385           |
| Aoah                                       | NM_012054                  | ref  Mus musculus acyloxyacyl hydrolase (Aoah), mRNA [NM_012054]                                                                                              | 0.46             | 0.016   | 0.272           |
| Fitm2                                      | NM_173397                  | ref  Mus musculus fat storage-inducing transmembrane protein 2 (Fitm2), mRNA [NM_173397]                                                                      | 0.46             | 0.023   | 0.319           |
| Cd44                                       | NM_009851                  | ref  Mus musculus CD44 antigen (Cd44), transcript variant 1, mRNA [NM_009851]                                                                                 | 0.46             | 0.030   | 0.364           |
| Cd302                                      | NM_025422                  | ref  Mus musculus CD302 antigen (Cd302), mRNA [NM_025422]                                                                                                     | 0.46             | 0.002   | 0.097           |
| chr1:74114371-74115267_R                   | chr1:74114371-74115267_R   | lincRNA:chr1:74114371-74115267 reverse strand                                                                                                                 | 0.46             | 0.017   | 0.277           |
| chr3:45081952-45092352_F                   | chr3:45081952-45092352_F   | lincRNA:chr3:45081952-45092352 forward strand                                                                                                                 | 0.46             | 0.020   | 0.296           |
| Acot3                                      | NM_134246                  | ref  Mus musculus acyl-CoA thioesterase 3 (Acot3), mRNA [NM_134246]                                                                                           | 0.46             | 0.005   | 0.155           |
| chr1:161969026-162001640_F                 | chr1:161969026-162001640_F | lincRNA:chr1:161969026-162001640 forward strand                                                                                                               | 0.46             | 0.004   | 0.131           |
| 2810474O19Rik                              | NM_026054                  | ref  Mus musculus RIKEN cDNA 2810474O19 gene (2810474O19Rik), mRNA [NM_026054]                                                                                | 0.45             | 0.005   | 0.155           |
| Plekha4                                    | NM_148927                  | ref  Mus musculus pleckstrin homology domain containing, family A (phosphoinositide binding specific) member 4 (Plekha4), mRNA [NM_148927]                    | 0.45             | 0.046   | 0.444           |
| chr4:146017200-146029700_R                 | chr4:146017200-146029700_R | lincRNA:chr4:146017200-146029700 reverse strand                                                                                                               | 0.45             | 0.025   | 0.332           |
| Olfr582                                    | NM_147053                  | ref  Mus musculus olfactory receptor 582 (Olfr582), mRNA [NM_147053]                                                                                          | 0.45             | 0.024   | 0.327           |
| chr1:175654606-175672031_F                 | chr1:175654606-175672031_F | lincRNA:chr1:175654606-175672031 forward strand                                                                                                               | 0.45             | 0.008   | 0.185           |
| Fam107a                                    | NM_183187                  | ref  Mus musculus family with sequence similarity 107, member A (Fam107a), mRNA [NM_183187]                                                                   | 0.45             | 0.047   | 0.446           |
| chr18:12755615-12773365_R                  | chr18:12755615-12773365_R  | lincRNA:chr18:12755615-12773365 reverse strand                                                                                                                | 0.45             | 0.007   | 0.175           |
| Eps8                                       | NM_007945                  | ref  Mus musculus epidermal growth factor receptor pathway substrate 8 (Eps8), mRNA [NM_007945]                                                               | 0.45             | 0.002   | 0.102           |
| LOC100045474                               | XR_032156                  | ref  PREDICTED: Mus musculus similar to ADP-ribosylation factor GTPase activating protein 3 (LOC100045474), misc RNA [XR_032156]                              | 0.45             | 0.003   | 0.116           |
| chr13:64018565-64082570_R                  | chr13:64018565-64082570_R  | lincRNA:chr13:64018565-64082570 reverse strand                                                                                                                | 0.45             | 0.045   | 0.439           |
| chr17:6455677-6476228_F                    | chr17:6455677-6476228_F    | lincRNA:chr17:6455677-6476228 forward strand                                                                                                                  | 0.45             | 0.007   | 0.177           |

| Online Supplemental Table IV: Con-STZ Only |                            |                                                                                                                                                             |                      |         |                 |
|--------------------------------------------|----------------------------|-------------------------------------------------------------------------------------------------------------------------------------------------------------|----------------------|---------|-----------------|
| Gene Symbol                                | RefSeq                     | Description                                                                                                                                                 | logFC<br>Con-<br>STZ | P-value | Adj.<br>P-value |
| chr4:133368314-133380210_R                 | chr4:133368314-133380210_R | lincRNA:chr4:133368314-133380210 reverse strand                                                                                                             | 0.45                 | 0.020   | 0.294           |
| Adprhl1                                    | NM_172750                  | ref  Mus musculus ADP-ribosylhydrolase like 1 (Adprhl1), mRNA [NM_172750]                                                                                   | 0.45                 | 0.001   | 0.064           |
| Fbln1                                      | NM_010180                  | ref  Mus musculus fibulin 1 (Fbln1), mRNA [NM_010180]                                                                                                       | 0.45                 | 0.016   | 0.270           |
| AA522020                                   | AA522020                   | gb vh78e12.r1 Knowles Solter mouse E6 5d whole embryo Mus musculus cDNA clone IMAGE:893134 3'. [AA522020]                                                   | 0.45                 | 0.001   | 0.069           |
| Lrp1b                                      | NM_053011                  | ref  Mus musculus low density lipoprotein-related protein 1B (deleted in tumors) (Lrp1b), mRNA [NM_053011]                                                  | 0.45                 | 0.023   | 0.319           |
| Igfbp4                                     | NM_010517                  | ref  Mus musculus insulin-like growth factor binding protein 4 (Igfbp4), mRNA [NM_010517]                                                                   | 0.45                 | 0.006   | 0.166           |
| Ldoc1                                      | NM_001018087               | ref  Mus musculus leucine zipper, down-regulated in cancer 1 (Ldoc1), mRNA [NM_001018087]                                                                   | 0.45                 | 0.008   | 0.194           |
| Pkp4                                       | NM_026361                  | ref  Mus musculus plakophilin 4 (Pkp4), transcript variant 1, mRNA [NM_026361]                                                                              | 0.45                 | 0.003   | 0.123           |
| Gabarapl1                                  | NM_020590                  | ref  Mus musculus gamma-aminobutyric acid (GABA) A receptor-associated protein-like 1 (Gabarapl1), mRNA [NM_020590]                                         | 0.45                 | 0.026   | 0.337           |
| Htra3                                      | NM_001042615               | ref  Mus musculus HtrA serine peptidase 3 (Htra3), transcript variant 2, mRNA [NM_001042615]                                                                | 0.45                 | 0.001   | 0.054           |
| LOC100044317                               | XM_001471589               | ref  PREDICTED: Mus musculus hypothetical protein LOC100044317 (LOC100044317), mRNA [XM_001471589]                                                          | 0.45                 | 0.008   | 0.194           |
| Pdgfra                                     | NM_011058                  | ref  Mus musculus platelet derived growth factor receptor, alpha polypeptide (Pdgfra), transcript variant 1, mRNA [NM_011058]                               | 0.45                 | 0.003   | 0.114           |
| Gm13337                                    | XR_032647                  | ref  PREDICTED: Mus musculus similar to 3-phosphoglycerate dehydrogenase (LOC637235), misc RNA [XR_032647]                                                  | 0.45                 | 0.006   | 0.157           |
| ENSMUST00000059018                         | ENSMUST00000059018         | ens  RIKEN cDNA 1110003O08 gene Gene [Source:MGI Symbol;Acc:MGI:1923541] [ENSMUST00000059018]                                                               | 0.45                 | 0.010   | 0.208           |
| Cacnb3                                     | NM_007581                  | ref  Mus musculus calcium channel, voltage-dependent, beta 3 subunit (Cacnb3), transcript variant 1, mRNA [NM_007581]                                       | 0.45                 | 0.001   | 0.048           |
| 4930512H18Rik                              | AK084432                   | gb  Mus musculus 12 days embryo eyeball cDNA, RIKEN full-length enriched library, clone:D230045M11 product:unclassifiable, full insert sequence. [AK084432] | 0.45                 | 0.004   | 0.142           |
| LOC546233                                  | XM_001479766               | ref  PREDICTED: Mus musculus hypothetical LOC546233 (LOC546233), mRNA [XM_001479766]                                                                        | 0.45                 | 0.003   | 0.123           |
| chr15:96984422-97000322_R                  | chr15:96984422-97000322_R  | lincRNA:chr15:96984422-97000322 reverse strand                                                                                                              | 0.45                 | 0.044   | 0.436           |
| chr10:84005221-84022896_F                  | chr10:84005221-84022896_F  | lincRNA:chr10:84005221-84022896 forward strand                                                                                                              | 0.45                 | 0.017   | 0.279           |
| 1700017B05Rik                              | NM_028820                  | ref  Mus musculus RIKEN cDNA 1700017B05 gene (1700017B05Rik), mRNA [NM_028820]                                                                              | 0.45                 | 0.001   | 0.058           |
| Fut1                                       | NM_008051                  | ref  Mus musculus fucosyltransferase 1 (Fut1), mRNA [NM_008051]                                                                                             | 0.45                 | 0.015   | 0.260           |
| ENSMUST00000087884                         | ENSMUST00000087884         | Unknown                                                                                                                                                     | 0.44                 | 0.036   | 0.391           |
| Dpysl3                                     | NM_009468                  | ref  Mus musculus dihydropyrimidinase-like 3 (Dpysl3), transcript variant 2, mRNA [NM_009468]                                                               | 0.44                 | 0.034   | 0.380           |
| ENSMUST00000119102                         | ENSMUST00000119102         | ens  DEAH (Asp-Glu-Ala-His) box polypeptide 34 Gene [Source:MGI (curated);Acc:MGI:1918973] [ENSMUST00000119102]                                             | 0.44                 | 0.028   | 0.348           |
| Gm9485                                     | XM_001475063               | ref  PREDICTED: Mus musculus similar to retinitis pigmentosa GTPase regulator (LOC670449), mRNA [XM_001475063]                                              | 0.44                 | 0.023   | 0.319           |

| Online Supplemental Table IV: Con-STZ Only |                           |                                                                                                                                                                     |                  |         |                 |
|--------------------------------------------|---------------------------|---------------------------------------------------------------------------------------------------------------------------------------------------------------------|------------------|---------|-----------------|
| Gene Symbol                                | RefSeq                    | Description                                                                                                                                                         | logFC<br>Con-STZ | P-value | Adj.<br>P-value |
| A530072M11Rik                              | AK080160                  | gb Mus musculus adult male aorta and vein cDNA, RIKEN full-length enriched library, clone:A530072M11 product:unclassifiable, full insert sequence. [AK080160]       | 0.44             | 0.007   | 0.183           |
| Enpp2                                      | NM_001136077              | ref Mus musculus ectonucleotide pyrophosphatase/phosphodiesterase 2 (Enpp2), transcript variant 1, mRNA [NM_001136077]                                              | 0.44             | 0.001   | 0.059           |
| 1700085B03Rik                              | BU936879                  | gb AGENCOURT_10524094 NIH_MGC_169 Mus musculus cDNA clone IMAGE:6704706 5', mRNA sequence [BU936879]                                                                | 0.44             | 0.003   | 0.123           |
| Car13                                      | NM_024495                 | ref Mus musculus carbonic anhydrase 13 (Car13), mRNA [NM_024495]                                                                                                    | 0.44             | 0.008   | 0.189           |
| chr15:61870759-61938796_F                  | chr15:61870759-61938796_F | lincRNA:chr15:61870759-61938796 forward strand                                                                                                                      | 0.44             | 0.029   | 0.353           |
| Oas1g                                      | NM_011852                 | ref Mus musculus 2'-5' oligoadenylate synthetase 1G (Oas1g), mRNA [NM_011852]                                                                                       | 0.44             | 0.008   | 0.185           |
| 1500011B03Rik                              | NR_027818                 | ref Mus musculus RIKEN cDNA 1500011B03 gene (1500011B03Rik), transcript variant 2, non-coding RNA [NR_027818]                                                       | 0.44             | 0.001   | 0.080           |
| Dbn1                                       | NM_001177371              | ref Mus musculus drebrin 1 (Dbn1), transcript variant 1, mRNA [NM_001177371]                                                                                        | 0.44             | 0.009   | 0.195           |
| Egfr                                       | NM_207655                 | ref Mus musculus epidermal growth factor receptor (Egfr), transcript variant 1, mRNA [NM_207655]                                                                    | 0.44             | 0.001   | 0.074           |
| Tacr1                                      | NM_009313                 | ref Mus musculus tachykinin receptor 1 (Tacr1), mRNA [NM_009313]                                                                                                    | 0.44             | 0.008   | 0.183           |
| Tacr2                                      | NM_009314                 | ref Mus musculus tachykinin receptor 2 (Tacr2), mRNA [NM_009314]                                                                                                    | 0.44             | 0.036   | 0.393           |
| Gm15264                                    | XM_001478841              | ref PREDICTED: Mus musculus similar to tuftelin (LOC100042801), mRNA [XM_001478841]                                                                                 | 0.44             | 0.035   | 0.387           |
| 1700019B03Rik                              | NM_029598                 | ref Mus musculus RIKEN cDNA 1700019B03 gene (1700019B03Rik), mRNA [NM_029598]                                                                                       | 0.44             | 0.023   | 0.320           |
| chr14:79249302-79290000_R                  | chr14:79249302-79290000_R | lincRNA:chr14:79249302-79290000 reverse strand                                                                                                                      | 0.44             | 0.017   | 0.275           |
| chr8:74348539-74378200_R                   | chr8:74348539-74378200_R  | lincRNA:chr8:74348539-74378200 reverse strand                                                                                                                       | 0.44             | 0.025   | 0.332           |
| B230110C06Rik                              | AK020961                  | gb Mus musculus adult male corpora quadrigemina cDNA, RIKEN full-length enriched library, clone:B230110C06 product:unclassifiable, full insert sequence. [AK020961] | 0.44             | 0.004   | 0.133           |
| chr17:26911032-26912366_F                  | chr17:26911032-26912366_F | lincRNA:chr17:26911032-26912366 forward strand                                                                                                                      | 0.44             | 0.045   | 0.439           |
| Oas1                                       | NM_145209                 | ref Mus musculus 2'-5' oligoadenylate synthetase-like 1 (Oas1), mRNA [NM_145209]                                                                                    | 0.44             | 0.039   | 0.412           |
| Apbb1ip                                    | NM_019456                 | ref Mus musculus amyloid beta (A4) precursor protein-binding, family B, member 1 interacting protein (Apbb1ip), mRNA [NM_019456]                                    | 0.44             | 0.010   | 0.207           |
| chr7:68849401-68958266_R                   | chr7:68849401-68958266_R  | lincRNA:chr7:68849401-68958266 reverse strand                                                                                                                       | 0.44             | 0.025   | 0.331           |
| Slc6a13                                    | NM_144512                 | ref Mus musculus solute carrier family 6 (neurotransmitter transporter, GABA), member 13 (Slc6a13), mRNA [NM_144512]                                                | 0.44             | 0.022   | 0.310           |
| chr14:55671783-55680316_R                  | chr14:55671783-55680316_R | lincRNA:chr14:55671783-55680316 reverse strand                                                                                                                      | 0.44             | 0.023   | 0.318           |
| Scpep1                                     | NM_029023                 | ref Mus musculus serine carboxypeptidase 1 (Scpep1), mRNA [NM_029023]                                                                                               | 0.44             | 0.004   | 0.134           |
| chr2:72818943-72826893_F                   | chr2:72818943-72826893_F  | lincRNA:chr2:72818943-72826893 forward strand                                                                                                                       | 0.44             | 0.019   | 0.294           |
| chr18:63524187-63524582_R                  | chr18:63524187-63524582_R | lincRNA:chr18:63524187-63524582 reverse strand                                                                                                                      | 0.44             | 0.043   | 0.428           |

| Online Supplemental Table IV: Con-STZ Only |                            |                                                                                                                                                              |                      |         |                 |
|--------------------------------------------|----------------------------|--------------------------------------------------------------------------------------------------------------------------------------------------------------|----------------------|---------|-----------------|
| Gene Symbol                                | RefSeq                     | Description                                                                                                                                                  | logFC<br>Con-<br>STZ | P-value | Adj.<br>P-value |
| ENSMUST00000059658                         | ENSMUST00000059658         | ens  predicted gene 867 Gene [Source:MGI Symbol;Acc:MGI:2685713] [ENSMUST00000059658]                                                                        | 0.44                 | 0.013   | 0.246           |
| chr1:59449275-59474025_F                   | chr1:59449275-59474025_F   | lincRNA:chr1:59449275-59474025 forward strand                                                                                                                | 0.43                 | 0.023   | 0.317           |
| Ino80                                      | NM_026574                  | ref  Mus musculus INO80 homolog (S. cerevisiae) (Ino80), mRNA [NM_026574]                                                                                    | 0.43                 | 0.036   | 0.392           |
| chrX:148803114-148851243_F                 | chrX:148803114-148851243_F | lincRNA:chrX:148803114-148851243 forward strand                                                                                                              | 0.43                 | 0.038   | 0.402           |
| Tcstv3                                     | NM_153523                  | ref  Mus musculus 2-cell-stage, variable group, member 3 (Tcstv3), mRNA [NM_153523]                                                                          | 0.43                 | 0.014   | 0.257           |
| Hspb1                                      | NM_013560                  | ref  Mus musculus heat shock protein 1 (Hspb1), mRNA [NM_013560]                                                                                             | 0.43                 | 0.000   | 0.042           |
| Rnd1                                       | NM_172612                  | ref  Mus musculus Rho family GTPase 1 (Rnd1), mRNA [NM_172612]                                                                                               | 0.43                 | 0.046   | 0.443           |
| chr10:21542515-21579890_F                  | chr10:21542515-21579890_F  | lincRNA:chr10:21542515-21579890 forward strand                                                                                                               | 0.43                 | 0.021   | 0.303           |
| Siah1a                                     | NM_009172                  | ref  Mus musculus seven in absentia 1A (Siah1a), mRNA [NM_009172]                                                                                            | 0.43                 | 0.008   | 0.183           |
| Fgfr3                                      | NM_008010                  | ref  Mus musculus fibroblast growth factor receptor 3 (Fgfr3), transcript variant 1, mRNA [NM_008010]                                                        | 0.43                 | 0.023   | 0.321           |
| Esyt3                                      | NM_177775                  | ref  Mus musculus extended synaptotagmin-like protein 3 (Esyt3), mRNA [NM_177775]                                                                            | 0.43                 | 0.020   | 0.295           |
| Ccdc150                                    | NM_030025                  | ref  Mus musculus coiled-coil domain containing 150 (Ccdc150), mRNA [NM_030025]                                                                              | 0.43                 | 0.027   | 0.344           |
| Hsfy2                                      | NM_027661                  | ref  Mus musculus heat shock transcription factor, Y linked 2 (Hsfy2), mRNA [NM_027661]                                                                      | 0.43                 | 0.002   | 0.089           |
| Numbl                                      | NM_010950                  | ref  Mus musculus numb-like (Numbl), mRNA [NM_010950]                                                                                                        | 0.43                 | 0.040   | 0.416           |
| chr18:63455560-63548085_F                  | chr18:63455560-63548085_F  | lincRNA:chr18:63455560-63548085 forward strand                                                                                                               | 0.43                 | 0.049   | 0.453           |
| Armxc3                                     | NM_027870                  | ref  Mus musculus armadillo repeat containing, X-linked 3 (Armxc3), mRNA [NM_027870]                                                                         | 0.43                 | 0.002   | 0.086           |
| Axl                                        | NM_009465                  | ref  Mus musculus AXL receptor tyrosine kinase (Axl), mRNA [NM_009465]                                                                                       | 0.43                 | 0.004   | 0.126           |
| A430110N23Rik                              | NM_173008                  | ref  Mus musculus RIKEN cDNA A430110N23 gene (A430110N23Rik), mRNA [NM_173008]                                                                               | 0.43                 | 0.008   | 0.183           |
| Sema3b                                     | NM_001042779               | ref  Mus musculus sema domain, immunoglobulin domain (Ig), short basic domain, secreted, (semaphorin) 3B (Sema3b), transcript variant 1, mRNA [NM_001042779] | 0.43                 | 0.001   | 0.050           |
| Amd2                                       | NM_007444                  | ref  Mus musculus S-adenosylmethionine decarboxylase 2 (Amd2), mRNA [NM_007444]                                                                              | 0.43                 | 0.024   | 0.327           |
| Arg1                                       | NM_007482                  | ref  Mus musculus arginase, liver (Arg1), mRNA [NM_007482]                                                                                                   | 0.43                 | 0.048   | 0.452           |
| Cdsn                                       | NM_001008424               | ref  Mus musculus corneodesmosin (Cdsn), mRNA [NM_001008424]                                                                                                 | 0.43                 | 0.010   | 0.212           |
| chr6:31007184-31007725_R                   | chr6:31007184-31007725_R   | lincRNA:chr6:31007184-31007725 reverse strand                                                                                                                | 0.43                 | 0.038   | 0.404           |
| St3gal1                                    | NM_009177                  | ref  Mus musculus ST3 beta-galactoside alpha-2,3-sialyltransferase 1 (St3gal1), mRNA [NM_009177]                                                             | 0.43                 | 0.003   | 0.116           |
| Amd2                                       | NM_007444                  | ref  Mus musculus S-adenosylmethionine decarboxylase 2 (Amd2), mRNA [NM_007444]                                                                              | 0.42                 | 0.035   | 0.386           |
| Clip3                                      | NM_001081114               | ref  Mus musculus CAP-GLY domain containing linker protein 3 (Clip3), mRNA [NM_001081114]                                                                    | 0.42                 | 0.000   | 0.043           |
| chr5:88995039-89009064_F                   | chr5:88995039-89009064_F   | lincRNA:chr5:88995039-89009064 forward strand                                                                                                                | 0.42                 | 0.003   | 0.126           |
| Snrnp35                                    | NM_029532                  | ref  Mus musculus small nuclear ribonucleoprotein 35 (U11/U12) (Snrnp35), mRNA [NM_029532]                                                                   | 0.42                 | 0.003   | 0.114           |



| Online Supplemental Table IV: Con-STZ Only |                            |                                                                                                                                                                   |                  |         |                 |
|--------------------------------------------|----------------------------|-------------------------------------------------------------------------------------------------------------------------------------------------------------------|------------------|---------|-----------------|
| Gene Symbol                                | RefSeq                     | Description                                                                                                                                                       | logFC<br>Con-STZ | P-value | Adj.<br>P-value |
| ENSMUST00000106176                         | ENSMUST00000106176         | ens  guanine nucleotide binding protein-like 2 (nucleolar) Gene [Source:MGI (curated);Acc:MGI:2385207] [ENSMUST00000106176]                                       | 0.42             | 0.015   | 0.259           |
| Gm4230                                     | XM_001479798               | ref  PREDICTED: Mus musculus hypothetical protein LOC100043099 (LOC100043099), mRNA [XM_001479798]                                                                | 0.42             | 0.026   | 0.339           |
| chr14:77104770-77105392_F                  | chr14:77104770-77105392_F  | lincRNA:chr14:77104770-77105392 forward strand                                                                                                                    | 0.42             | 0.042   | 0.424           |
| chr5:75389503-75396250_F                   | chr5:75389503-75396250_F   | lincRNA:chr5:75389503-75396250 forward strand                                                                                                                     | 0.42             | 0.029   | 0.359           |
| chr10:94900849-94928059_R                  | chr10:94900849-94928059_R  | lincRNA:chr10:94900849-94928059 reverse strand                                                                                                                    | 0.42             | 0.047   | 0.446           |
| chr2:83517176-83519228_R                   | chr2:83517176-83519228_R   | lincRNA:chr2:83517176-83519228 reverse strand                                                                                                                     | 0.42             | 0.026   | 0.337           |
| 2310050B05Rik                              | AK136697                   | gb  Mus musculus adult male epididymis cDNA, RIKEN full-length enriched library, clone:9230023N21 product: hypothetical protein, full insert sequence. [AK136697] | 0.42             | 0.021   | 0.306           |
| Siglec1                                    | NM_011426                  | ref  Mus musculus sialic acid binding Ig-like lectin 1, sialoadhesin (Siglec1), mRNA [NM_011426]                                                                  | 0.42             | 0.039   | 0.412           |
| chr3:96074625-96086375_R                   | chr3:96074625-96086375_R   | lincRNA:chr3:96074625-96086375 reverse strand                                                                                                                     | 0.42             | 0.041   | 0.420           |
| chr1:141824450-141835125_F                 | chr1:141824450-141835125_F | lincRNA:chr1:141824450-141835125 forward strand                                                                                                                   | 0.42             | 0.002   | 0.086           |
| Tgfb2                                      | NM_009371                  | ref  Mus musculus transforming growth factor, beta receptor II (Tgfb2), transcript variant 1, mRNA [NM_009371]                                                    | 0.42             | 0.003   | 0.126           |
| Gprc5b                                     | NM_022420                  | ref  Mus musculus G protein-coupled receptor, family C, group 5, member B (Gprc5b), mRNA [NM_022420]                                                              | 0.42             | 0.002   | 0.088           |
| Tgif2                                      | NM_173396                  | ref  Mus musculus TGFB-induced factor homeobox 2 (Tgif2), mRNA [NM_173396]                                                                                        | 0.42             | 0.034   | 0.385           |
| chr1:167797581-167803031_R                 | chr1:167797581-167803031_R | lincRNA:chr1:167797581-167803031 reverse strand                                                                                                                   | 0.42             | 0.007   | 0.178           |
| B3gnt8                                     | NM_146184                  | ref  Mus musculus UDP-GlcNAc:betaGal beta-1,3-N-acetylglucosaminyltransferase 8 (B3gnt8), transcript variant 1, mRNA [NM_146184]                                  | 0.42             | 0.015   | 0.260           |
| Larp6                                      | NM_026235                  | ref  Mus musculus La ribonucleoprotein domain family, member 6 (Larp6), mRNA [NM_026235]                                                                          | 0.42             | 0.001   | 0.051           |
| Fosl2                                      | NM_008037                  | ref  Mus musculus fos-like antigen 2 (Fosl2), mRNA [NM_008037]                                                                                                    | 0.42             | 0.028   | 0.350           |
| Zfp239                                     | NM_001001792               | ref  Mus musculus zinc finger protein 239 (Zfp239), transcript variant 1, mRNA [NM_001001792]                                                                     | 0.42             | 0.028   | 0.351           |
| chr12:73860757-73862034_R                  | chr12:73860757-73862034_R  | lincRNA:chr12:73860757-73862034 reverse strand                                                                                                                    | 0.42             | 0.016   | 0.272           |
| chr5:54053882-54054174_F                   | chr5:54053882-54054174_F   | lincRNA:chr5:54053882-54054174 forward strand                                                                                                                     | 0.42             | 0.022   | 0.311           |
| Pycr1                                      | ENSMUST00000026133         | ens  pyrroline-5-carboxylate reductase 1 Gene [Source:MGI (curated);Acc:MGI:2384795] [ENSMUST00000026133]                                                         | 0.42             | 0.022   | 0.311           |
| chr18:57124435-57134910_F                  | chr18:57124435-57134910_F  | lincRNA:chr18:57124435-57134910 forward strand                                                                                                                    | 0.41             | 0.022   | 0.311           |
| Dclk1                                      | NM_019978                  | ref  Mus musculus doublecortin-like kinase 1 (Dclk1), transcript variant 1, mRNA [NM_019978]                                                                      | 0.41             | 0.032   | 0.375           |
| Zfp663                                     | NM_001005425               | ref  Mus musculus zinc finger protein 663 (Zfp663), mRNA [NM_001005425]                                                                                           | 0.41             | 0.001   | 0.075           |
| Tcfcp2l1                                   | NM_023755                  | ref  Mus musculus transcription factor CP2-like 1 (Tcfcp2l1), mRNA [NM_023755]                                                                                    | 0.41             | 0.048   | 0.449           |
| Il28ra                                     | NM_174851                  | ref  Mus musculus interleukin 28 receptor alpha (Il28ra), mRNA [NM_174851]                                                                                        | 0.41             | 0.016   | 0.271           |

| Online Supplemental Table IV: Con-STZ Only |                            |                                                                                                                                                               |                  |         |                 |
|--------------------------------------------|----------------------------|---------------------------------------------------------------------------------------------------------------------------------------------------------------|------------------|---------|-----------------|
| Gene Symbol                                | RefSeq                     | Description                                                                                                                                                   | logFC<br>Con-STZ | P-value | Adj.<br>P-value |
| Slc4a4                                     | NM_018760                  | ref  Mus musculus solute carrier family 4 (anion exchanger), member 4 (Slc4a4), transcript variant 1, mRNA [NM_018760]                                        | 0.41             | 0.042   | 0.426           |
| LOC100045005                               | XR_031422                  | ref  PREDICTED: Mus musculus similar to Deltex3 (LOC100045005), misc RNA [XR_031422]                                                                          | 0.41             | 0.003   | 0.122           |
| C1qtnf3                                    | NM_030888                  | ref  Mus musculus C1q and tumor necrosis factor related protein 3 (C1qtnf3), mRNA [NM_030888]                                                                 | 0.41             | 0.008   | 0.190           |
| Arl13b                                     | NM_026577                  | ref  Mus musculus ADP-ribosylation factor-like 13B (Arl13b), mRNA [NM_026577]                                                                                 | 0.41             | 0.002   | 0.089           |
| Fgf20                                      | NM_030610                  | ref  Mus musculus fibroblast growth factor 20 (Fgf20), mRNA [NM_030610]                                                                                       | 0.41             | 0.030   | 0.360           |
| Mical1                                     | NM_138315                  | ref  Mus musculus microtubule associated monooxygenase, calponin and LIM domain containing 1 (Mical1), transcript variant 1, mRNA [NM_138315]                 | 0.41             | 0.000   | 0.028           |
| Igk-C                                      | AK036494                   | gb  Mus musculus adult male bone cDNA, RIKEN full-length enriched library, clone:9830118L20 product:unclassifiable, full insert sequence. [AK036494]          | 0.41             | 0.028   | 0.351           |
| chr6:31078802-31079644_R                   | chr6:31078802-31079644_R   | lincRNA:chr6:31078802-31079644 reverse strand                                                                                                                 | 0.41             | 0.045   | 0.441           |
| ENSMUST00000098351                         | ENSMUST00000098351         | ens  Putative uncharacterized protein [Source:UniProtKB/TrEMBL;Acc:Q3U0R0] [ENSMUST00000098351]                                                               | 0.41             | 0.018   | 0.282           |
| Amigo2                                     | NM_178114                  | ref  Mus musculus adhesion molecule with Ig like domain 2 (Amigo2), transcript variant 1, mRNA [NM_178114]                                                    | 0.41             | 0.015   | 0.260           |
| 1700025H01Rik                              | ENSMUST00000061675         | ens  RIKEN cDNA 1700025H01 gene Gene [Source:MGI Symbol;Acc:MGI:1922781] [ENSMUST00000061675]                                                                 | 0.41             | 0.030   | 0.366           |
| Pik3c2g                                    | NM_207683                  | ref  Mus musculus phosphatidylinositol 3-kinase, C2 domain containing, gamma polypeptide (Pik3c2g), transcript variant 1, mRNA [NM_207683]                    | 0.41             | 0.015   | 0.262           |
| BC061212                                   | NM_198667                  | ref  Mus musculus cDNA sequence BC061212 (BC061212), mRNA [NM_198667]                                                                                         | 0.41             | 0.013   | 0.245           |
| Fam167b                                    | NM_182783                  | ref  Mus musculus family with sequence similarity 167, member B (Fam167b), mRNA [NM_182783]                                                                   | 0.41             | 0.004   | 0.140           |
| chr4:135138014-135174889_R                 | chr4:135138014-135174889_R | lincRNA:chr4:135138014-135174889 reverse strand                                                                                                               | 0.41             | 0.046   | 0.444           |
| ENSMUST00000051744                         | ENSMUST00000051744         | ens  RIKEN cDNA A930104D05 gene Gene [Source:MGI Symbol;Acc:MGI:2444352] [ENSMUST00000051744]                                                                 | 0.41             | 0.050   | 0.457           |
| chr15:32708654-32725622_F                  | chr15:32708654-32725622_F  | lincRNA:chr15:32708654-32725622 forward strand                                                                                                                | 0.41             | 0.009   | 0.204           |
| 4933426K07Rik                              | AK016935                   | gb  Mus musculus adult male testis cDNA, RIKEN full-length enriched library, clone:4933426K07 product:unclassifiable, full insert sequence. [AK016935]        | 0.41             | 0.037   | 0.399           |
| Ier5                                       | NM_010500                  | ref  Mus musculus immediate early response 5 (Ier5), mRNA [NM_010500]                                                                                         | 0.41             | 0.012   | 0.238           |
| 1110028F18Rik                              | AK003944                   | gb  Mus musculus 18-day embryo whole body cDNA, RIKEN full-length enriched library, clone:1110028F18 product:unclassifiable, full insert sequence. [AK003944] | 0.41             | 0.042   | 0.423           |
| Sfp1                                       | NM_011355                  | ref  Mus musculus SFFV proviral integration 1 (Sfp1), mRNA [NM_011355]                                                                                        | 0.41             | 0.011   | 0.225           |
| Ccdc121                                    | NM_207280                  | ref  Mus musculus coiled-coil domain containing 121 (Ccdc121), mRNA [NM_207280]                                                                               | 0.41             | 0.041   | 0.420           |
| chr4:145000941-145148666_R                 | chr4:145000941-145148666_R | lincRNA:chr4:145000941-145148666 reverse strand                                                                                                               | 0.41             | 0.008   | 0.191           |
| chr1:175654606-175672031_R                 | chr1:175654606-175672031_R | lincRNA:chr1:175654606-175672031 reverse strand                                                                                                               | 0.41             | 0.018   | 0.280           |
| Egfr                                       | NM_007912                  | ref  Mus musculus epidermal growth factor receptor (Egfr), transcript variant 2, mRNA [NM_007912]                                                             | 0.41             | 0.019   | 0.291           |
| Olf539                                     | NM_146961                  | ref  Mus musculus olfactory receptor 539 (Olf539), mRNA [NM_146961]                                                                                           | 0.41             | 0.015   | 0.260           |

| Online Supplemental Table IV: Con-STZ Only |                           |                                                                                                                          |                  |         |                 |
|--------------------------------------------|---------------------------|--------------------------------------------------------------------------------------------------------------------------|------------------|---------|-----------------|
| Gene Symbol                                | RefSeq                    | Description                                                                                                              | logFC<br>Con-STZ | P-value | Adj.<br>P-value |
| Rhob                                       | NM_007483                 | ref  Mus musculus ras homolog gene family, member B (Rhob), mRNA [NM_007483]                                             | 0.40             | 0.003   | 0.112           |
| Arl13b                                     | NM_026577                 | ref  Mus musculus ADP-ribosylation factor-like 13B (Arl13b), mRNA [NM_026577]                                            | 0.40             | 0.005   | 0.152           |
| Casr                                       | NM_013803                 | ref  Mus musculus calcium-sensing receptor (Casr), mRNA [NM_013803]                                                      | 0.40             | 0.026   | 0.338           |
| chr10:94134000-94149200_F                  | chr10:94134000-94149200_F | lincRNA:chr10:94134000-94149200 forward strand                                                                           | 0.40             | 0.035   | 0.388           |
| Fam188b                                    | NM_177883                 | ref  Mus musculus family with sequence similarity 188, member B (Fam188b), transcript variant 2, mRNA [NM_177883]        | 0.40             | 0.023   | 0.319           |
| Tmem8                                      | NM_021793                 | ref  Mus musculus transmembrane protein 8 (five membrane-spanning domains) (Tmem8), mRNA [NM_021793]                     | 0.40             | 0.015   | 0.260           |
| chr3:62727150-62758225_F                   | chr3:62727150-62758225_F  | lincRNA:chr3:62727150-62758225 forward strand                                                                            | 0.40             | 0.038   | 0.407           |
| Fam126b                                    | NM_172513                 | ref  Mus musculus family with sequence similarity 126, member B (Fam126b), mRNA [NM_172513]                              | 0.40             | 0.002   | 0.100           |
| Dcbld1                                     | NM_025705                 | ref  Mus musculus discoidin, CUB and LCCL domain containing 1 (Dcbld1), mRNA [NM_025705]                                 | 0.40             | 0.022   | 0.311           |
| Gm3581                                     | XM_001476168              | ref  PREDICTED: Mus musculus hypothetical protein LOC100046408 (LOC100046408), mRNA [XM_001476168]                       | 0.40             | 0.027   | 0.347           |
| Ccdc80                                     | NM_026439                 | ref  Mus musculus coiled-coil domain containing 80 (Ccdc80), mRNA [NM_026439]                                            | 0.40             | 0.041   | 0.418           |
| Hpcal1                                     | NM_016677                 | ref  Mus musculus hippocalcin-like 1 (Hpcal1), mRNA [NM_016677]                                                          | 0.40             | 0.016   | 0.273           |
| Gm9791                                     | XM_001474886              | ref  PREDICTED: Mus musculus similar to calcium-regulated heat-stable protein (24kD) (LOC100040232), mRNA [XM_001474886] | 0.40             | 0.014   | 0.258           |
| ENSMUST00000097320                         | ENSMUST00000097320        | ens  Putative uncharacterized protein Fragment [Source:UniProtKB/TrEMBL;Acc:Q3TXX5] [ENSMUST00000097320]                 | 0.40             | 0.009   | 0.203           |
| chr3:70581406-70614856_R                   | chr3:70581406-70614856_R  | lincRNA:chr3:70581406-70614856 reverse strand                                                                            | 0.40             | 0.041   | 0.422           |
| C1ra                                       | NM_023143                 | ref  Mus musculus complement component 1, r subcomponent A (C1ra), mRNA [NM_023143]                                      | 0.40             | 0.049   | 0.456           |
| Igf1                                       | NM_010512                 | ref  Mus musculus insulin-like growth factor 1 (Igf1), transcript variant 1, mRNA [NM_010512]                            | 0.40             | 0.011   | 0.218           |
| Gm5632                                     | XM_486539                 | ref  PREDICTED: Mus musculus predicted gene, EG434676 (EG434676), mRNA [XM_486539]                                       | 0.40             | 0.011   | 0.220           |
| Pcolce2                                    | NM_029620                 | ref  Mus musculus procollagen C-endopeptidase enhancer 2 (Pcolce2), mRNA [NM_029620]                                     | 0.40             | 0.003   | 0.112           |
| Tmem92-ps                                  | NM_001163172              | ref  Mus musculus transmembrane protein 92, pseudogene (Tmem92-ps), transcript variant 1, mRNA [NM_001163172]            | 0.40             | 0.010   | 0.216           |
| Sbsn                                       | NM_172205                 | ref  Mus musculus suprabasin (Sbsn), transcript variant 1, mRNA [NM_172205]                                              | 0.40             | 0.001   | 0.074           |
| Mcf2l                                      | NM_178076                 | ref  Mus musculus mcf.2 transforming sequence-like (Mcf2l), transcript variant 1, mRNA [NM_178076]                       | 0.40             | 0.040   | 0.414           |
| S100a6                                     | NM_011313                 | ref  Mus musculus S100 calcium binding protein A6 (calcylin) (S100a6), mRNA [NM_011313]                                  | 0.40             | 0.022   | 0.310           |
| Cd36                                       | NM_007643                 | ref  Mus musculus CD36 antigen (Cd36), transcript variant 2, mRNA [NM_007643]                                            | 0.40             | 0.002   | 0.100           |
| ENSMUST00000034997                         | ENSMUST00000034997        | ens  RIKEN cDNA 2810026P18 gene Gene [Source:MGI Symbol;Acc:MGI:1919905] [ENSMUST00000034997]                            | 0.40             | 0.031   | 0.367           |
| 1700022P22Rik                              | NM_029336                 | ref  Mus musculus RIKEN cDNA 1700022P22 gene (1700022P22Rik), mRNA [NM_029336]                                           | 0.40             | 0.050   | 0.457           |

| Online Supplemental Table IV: Con-STZ Only |                           |                                                                                                                                                        |                  |         |                 |
|--------------------------------------------|---------------------------|--------------------------------------------------------------------------------------------------------------------------------------------------------|------------------|---------|-----------------|
| Gene Symbol                                | RefSeq                    | Description                                                                                                                                            | logFC<br>Con-STZ | P-value | Adj.<br>P-value |
| Lipa                                       | NM_021460                 | ref  Mus musculus lysosomal acid lipase A (Lipa), transcript variant 1, mRNA [NM_021460]                                                               | 0.40             | 0.019   | 0.289           |
| Stxbp2                                     | NM_011503                 | ref  Mus musculus syntaxin binding protein 2 (Stxbp2), mRNA [NM_011503]                                                                                | 0.40             | 0.008   | 0.195           |
| Kcns3                                      | NM_173417                 | ref  Mus musculus potassium voltage-gated channel, delayed-rectifier, subfamily S, member 3 (Kcns3), transcript variant 1, mRNA [NM_173417]            | 0.40             | 0.015   | 0.259           |
| chr10:24269317-24270145_R                  | chr10:24269317-24270145_R | lincRNA:chr10:24269317-24270145 reverse strand                                                                                                         | 0.40             | 0.033   | 0.379           |
| Cdh26                                      | NM_198656                 | ref  Mus musculus cadherin-like 26 (Cdh26), mRNA [NM_198656]                                                                                           | 0.40             | 0.026   | 0.341           |
| Cyb5r3                                     | NM_029787                 | ref  Mus musculus cytochrome b5 reductase 3 (Cyb5r3), mRNA [NM_029787]                                                                                 | 0.40             | 0.002   | 0.100           |
| Clec4a1                                    | NM_199311                 | ref  Mus musculus C-type lectin domain family 4, member a1 (Clec4a1), mRNA [NM_199311]                                                                 | 0.40             | 0.019   | 0.289           |
| chr14:76912477-76931702_R                  | chr14:76912477-76931702_R | lincRNA:chr14:76912477-76931702 reverse strand                                                                                                         | 0.40             | 0.020   | 0.296           |
| Olf113                                     | NM_146289                 | ref  Mus musculus olfactory receptor 113 (Olf113), mRNA [NM_146289]                                                                                    | 0.40             | 0.029   | 0.353           |
| chr7:69117827-69127242_R                   | chr7:69117827-69127242_R  | lincRNA:chr7:69117827-69127242 reverse strand                                                                                                          | 0.40             | 0.018   | 0.282           |
| 4930551I15Rik                              | AK016092                  | gb  Mus musculus adult male testis cDNA, RIKEN full-length enriched library, clone:4930551I15 product:unclassifiable, full insert sequence. [AK016092] | 0.40             | 0.028   | 0.349           |
| Slc7a6                                     | NM_178798                 | ref  Mus musculus solute carrier family 7 (cationic amino acid transporter, y+ system), member 6 (Slc7a6), mRNA [NM_178798]                            | 0.40             | 0.026   | 0.341           |
| Tiparp                                     | NM_178892                 | ref  Mus musculus TCDD-inducible poly(ADP-ribose) polymerase (Tiparp), mRNA [NM_178892]                                                                | 0.40             | 0.032   | 0.374           |
| Fcamr                                      | NM_001170632              | ref  Mus musculus Fc receptor, IgA, IgM, high affinity (Fcamr), transcript variant 1, mRNA [NM_001170632]                                              | 0.40             | 0.043   | 0.430           |
| Epha1                                      | NM_023580                 | ref  Mus musculus Eph receptor A1 (Epha1), mRNA [NM_023580]                                                                                            | 0.39             | 0.007   | 0.173           |
| Tlr7                                       | NM_133211                 | ref  Mus musculus toll-like receptor 7 (Tlr7), mRNA [NM_133211]                                                                                        | 0.39             | 0.002   | 0.086           |
| Klhl15                                     | NM_001039060              | ref  Mus musculus kelch-like 15 (Drosophila) (Klhl15), transcript variant 2, mRNA [NM_001039060]                                                       | 0.39             | 0.040   | 0.415           |
| Chst3                                      | NM_016803                 | ref  Mus musculus carbohydrate (chondroitin 6/keratan) sulfotransferase 3 (Chst3), mRNA [NM_016803]                                                    | 0.39             | 0.018   | 0.285           |
| Arid3a                                     | NM_007880                 | ref  Mus musculus AT rich interactive domain 3A (BRIGHT-like) (Arid3a), mRNA [NM_007880]                                                               | 0.39             | 0.045   | 0.440           |
| Rph3al                                     | ENSMUST00000121287        | ens  rabphilin 3A-like (without C2 domains) Gene [Source:MGI (curated);Acc:MGI:1923492] [ENSMUST00000121287]                                           | 0.39             | 0.013   | 0.241           |
| Rusc2                                      | NM_001037709              | ref  Mus musculus RUN and SH3 domain containing 2 (Rusc2), transcript variant 2, mRNA [NM_001037709]                                                   | 0.39             | 0.010   | 0.212           |
| chr10:83181374-83249918_R                  | chr10:83181374-83249918_R | lincRNA:chr10:83181374-83249918 reverse strand                                                                                                         | 0.39             | 0.006   | 0.159           |
| Atf7                                       | NM_146065                 | ref  Mus musculus activating transcription factor 7 (Atf7), mRNA [NM_146065]                                                                           | 0.39             | 0.012   | 0.231           |
| LOC100047683                               | XR_033828                 | ref  PREDICTED: Mus musculus hypothetical protein LOC100047683 (LOC100047683), misc RNA [XR_033828]                                                    | 0.39             | 0.032   | 0.375           |
| P2rx7                                      | NM_001038845              | ref  Mus musculus purinergic receptor P2X, ligand-gated ion channel, 7 (P2rx7), transcript variant 2, mRNA [NM_001038845]                              | 0.39             | 0.005   | 0.154           |
| Speer4d                                    | NM_025759                 | ref  Mus musculus spermatogenesis associated glutamate (E)-rich protein 4d (Speer4d), mRNA [NM_025759]                                                 | 0.39             | 0.049   | 0.455           |
| Ctps2                                      | NM_018737                 | ref  Mus musculus cytidine 5'-triphosphate synthase 2 (Ctps2), transcript variant 1, mRNA [NM_018737]                                                  | 0.39             | 0.005   | 0.152           |

| Online Supplemental Table IV: Con-STZ Only |                            |                                                                                                                                   |                  |         |                 |
|--------------------------------------------|----------------------------|-----------------------------------------------------------------------------------------------------------------------------------|------------------|---------|-----------------|
| Gene Symbol                                | RefSeq                     | Description                                                                                                                       | logFC<br>Con-STZ | P-value | Adj.<br>P-value |
| Thsd7a                                     | NM_001164805               | ref Mus musculus thrombospondin, type I, domain containing 7A (Thsd7a), mRNA [NM_001164805]                                       | 0.39             | 0.011   | 0.224           |
| Ftl2                                       | NM_008049                  | ref Mus musculus ferritin light chain 2 (Ftl2), mRNA [NM_008049]                                                                  | 0.39             | 0.007   | 0.177           |
| Phyhd1                                     | NM_172267                  | ref Mus musculus phytanoyl-CoA dioxygenase domain containing 1 (Phyhd1), mRNA [NM_172267]                                         | 0.39             | 0.006   | 0.165           |
| chr7:91558475-91733625_R                   | chr7:91558475-91733625_R   | lincRNA:chr7:91558475-91733625 reverse strand                                                                                     | 0.39             | 0.006   | 0.166           |
| Pdk3                                       | NM_145630                  | ref Mus musculus pyruvate dehydrogenase kinase, isoenzyme 3 (Pdk3), nuclear gene encoding mitochondrial protein, mRNA [NM_145630] | 0.39             | 0.023   | 0.316           |
| Rnf144b                                    | NM_146042                  | ref Mus musculus ring finger protein 144B (Rnf144b), transcript variant 1, mRNA [NM_146042]                                       | 0.39             | 0.017   | 0.276           |
| Ascl2                                      | NM_008554                  | ref Mus musculus achaete-scute complex homolog 2 (Drosophila) (Ascl2), mRNA [NM_008554]                                           | 0.39             | 0.031   | 0.367           |
| Pvt1                                       | NR_003368                  | ref Mus musculus plasmacytoma variant translocation 1 (Pvt1), non-coding RNA [NR_003368]                                          | 0.39             | 0.028   | 0.353           |
| chr5:108538417-108550517_F                 | chr5:108538417-108550517_F | lincRNA:chr5:108538417-108550517 forward strand                                                                                   | 0.39             | 0.019   | 0.291           |
| Eln                                        | NM_007925                  | ref Mus musculus elastin (Eln), mRNA [NM_007925]                                                                                  | 0.39             | 0.020   | 0.299           |
| Nrap                                       | NM_008733                  | ref Mus musculus nebulin-related anchoring protein (Nrap), transcript variant 2, mRNA [NM_008733]                                 | 0.39             | 0.001   | 0.067           |
| Fstl4                                      | NM_177059                  | ref Mus musculus follistatin-like 4 (Fstl4), mRNA [NM_177059]                                                                     | 0.39             | 0.042   | 0.422           |
| Slc7a3                                     | NM_007515                  | ref Mus musculus solute carrier family 7 (cationic amino acid transporter, y+ system), member 3 (Slc7a3), mRNA [NM_007515]        | 0.39             | 0.010   | 0.212           |
| chr7:99878349-99882258_R                   | chr7:99878349-99882258_R   | lincRNA:chr7:99878349-99882258 reverse strand                                                                                     | 0.39             | 0.048   | 0.452           |
| ENSMUST00000095817                         | ENSMUST00000095817         | ref PREDICTED: Mus musculus hypothetical protein LOC100039660 (LOC100039660), mRNA [XM_001473279]                                 | 0.39             | 0.046   | 0.443           |
| Tmem202                                    | NM_178388                  | ref Mus musculus transmembrane protein 202 (Tmem202), mRNA [NM_178388]                                                            | 0.39             | 0.015   | 0.260           |
| Col16a1                                    | NM_028266                  | ref Mus musculus collagen, type XVI, alpha 1 (Col16a1), mRNA [NM_028266]                                                          | 0.39             | 0.045   | 0.439           |
| LOC100046627                               | XM_001476526               | ref PREDICTED: Mus musculus hypothetical protein LOC100046627 (LOC100046627), mRNA [XM_001476526]                                 | 0.39             | 0.007   | 0.180           |
| chr12:73860757-73862034_R                  | chr12:73860757-73862034_R  | lincRNA:chr12:73860757-73862034 reverse strand                                                                                    | 0.39             | 0.038   | 0.402           |
| Irak3                                      | NM_028679                  | ref Mus musculus interleukin-1 receptor-associated kinase 3 (Irak3), mRNA [NM_028679]                                             | 0.39             | 0.004   | 0.139           |
| 4930486L24Rik                              | NM_178098                  | ref Mus musculus RIKEN cDNA 4930486L24 gene (4930486L24Rik), mRNA [NM_178098]                                                     | 0.39             | 0.016   | 0.272           |
| 9930021D14Rik                              | NM_175682                  | ref Mus musculus RIKEN cDNA 9930021D14 gene (9930021D14Rik), mRNA [NM_175682]                                                     | 0.39             | 0.048   | 0.449           |
| Slc38a1                                    | NM_134086                  | ref Mus musculus solute carrier family 38, member 1 (Slc38a1), transcript variant 1, mRNA [NM_134086]                             | 0.39             | 0.026   | 0.341           |
| Dpep2                                      | NM_176913                  | ref Mus musculus dipeptidase 2 (Dpep2), mRNA [NM_176913]                                                                          | 0.39             | 0.029   | 0.357           |
| chr18:83087114-83122014_F                  | chr18:83087114-83122014_F  | lincRNA:chr18:83087114-83122014 forward strand                                                                                    | 0.39             | 0.023   | 0.319           |
| chr5:33773842-33942967_F                   | chr5:33773842-33942967_F   | lincRNA:chr5:33773842-33942967 forward strand                                                                                     | 0.38             | 0.034   | 0.384           |
| Pcdhb13                                    | NM_053138                  | ref Mus musculus protocadherin beta 13 (Pcdhb13), mRNA [NM_053138]                                                                | 0.38             | 0.022   | 0.310           |
| ENSMUST00000115706                         | ENSMUST00000115706         | ens YdjC homolog (bacterial) Gene [Source:MGI (curated);Acc:MGI:1916351] [ENSMUST00000115706]                                     | 0.38             | 0.041   | 0.421           |
| Snnp35                                     | NM_029532                  | ref Mus musculus small nuclear ribonucleoprotein 35 (U11/U12) (Snnp35), mRNA [NM_029532]                                          | 0.38             | 0.007   | 0.174           |

| Online Supplemental Table IV: Con-STZ Only |                            |                                                                                                                                                            |                  |         |                 |
|--------------------------------------------|----------------------------|------------------------------------------------------------------------------------------------------------------------------------------------------------|------------------|---------|-----------------|
| Gene Symbol                                | RefSeq                     | Description                                                                                                                                                | logFC<br>Con-STZ | P-value | Adj.<br>P-value |
| Arl8a                                      | NM_026823                  | ref Mus musculus ADP-ribosylation factor-like 8A (Arl8a), mRNA [NM_026823]                                                                                 | 0.38             | 0.001   | 0.066           |
| ENSMUST00000050386                         | ENSMUST00000050386         | ens Brain cDNA, clone MNCb-1768cDNA sequence AB041803 ; [Source:UniProtKB/TrEMBL;Acc:Q8K5E3] [ENSMUST00000050386]                                          | 0.38             | 0.035   | 0.391           |
| Agpat9                                     | NM_172715                  | ref Mus musculus 1-acylglycerol-3-phosphate O-acyltransferase 9 (Agpat9), transcript variant 1, mRNA [NM_172715]                                           | 0.38             | 0.004   | 0.129           |
| Tlx2                                       | NM_009392                  | ref Mus musculus T-cell leukemia, homeobox 2 (Tlx2), mRNA [NM_009392]                                                                                      | 0.38             | 0.044   | 0.432           |
| Lce1d                                      | NM_027137                  | ref Mus musculus late cornified envelope 1D (Lce1d), mRNA [NM_027137]                                                                                      | 0.38             | 0.047   | 0.447           |
| Pcdh7                                      | NM_018764                  | ref Mus musculus protocadherin 7 (Pcdh7), transcript variant 2, mRNA [NM_018764]                                                                           | 0.38             | 0.015   | 0.260           |
| Mafb                                       | NM_010658                  | ref Mus musculus v-maf musculoaponeurotic fibrosarcoma oncogene family, protein B (avian) (Mafb), mRNA [NM_010658]                                         | 0.38             | 0.013   | 0.245           |
| 1700120C14Rik                              | BX512981                   | gb BX512981 Soares mouse p3NMF19.5 Mus musculus cDNA clone IMAGEp998M041174 ; IMAGE:493227, mRNA sequence [BX512981]                                       | 0.38             | 0.003   | 0.114           |
| chr3:90427029-90427674_F                   | chr3:90427029-90427674_F   | lincRNA:chr3:90427029-90427674 forward strand                                                                                                              | 0.38             | 0.032   | 0.374           |
| LOC100045679                               | XM_001474939               | ref PREDICTED: Mus musculus hypothetical protein LOC100045679 (LOC100045679), mRNA [XM_001474939]                                                          | 0.38             | 0.005   | 0.154           |
| Edn1                                       | NM_010104                  | ref Mus musculus endothelin 1 (Edn1), mRNA [NM_010104]                                                                                                     | 0.38             | 0.039   | 0.412           |
| Cttnbp2nl                                  | NM_030249                  | ref Mus musculus CTTNBP2 N-terminal like (Cttnbp2nl), transcript variant 1, mRNA [NM_030249]                                                               | 0.38             | 0.006   | 0.170           |
| Sdccag3                                    | NM_026563                  | ref Mus musculus serologically defined colon cancer antigen 3 (Sdccag3), transcript variant 1, mRNA [NM_026563]                                            | 0.38             | 0.032   | 0.373           |
| Xirp2                                      | NM_001024618               | ref Mus musculus xin actin-binding repeat containing 2 (Xirp2), transcript variant 1, mRNA [NM_001024618]                                                  | 0.38             | 0.021   | 0.306           |
| ENSMUST00000035629                         | ENSMUST00000035629         | gb Mus musculus activated spleen cDNA, RIKEN full-length enriched library, clone:F830009N17 product:hypothetical protein, full insert sequence. [AK171768] | 0.38             | 0.005   | 0.154           |
| Slc27a5                                    | NM_009512                  | ref Mus musculus solute carrier family 27 (fatty acid transporter), member 5 (Slc27a5), mRNA [NM_009512]                                                   | 0.38             | 0.009   | 0.202           |
| ENSMUST00000091506                         | ENSMUST00000091506         | ref PREDICTED: Mus musculus similar to ribosomal protein S28 (LOC100045642), mRNA [XM_001474102]                                                           | 0.38             | 0.010   | 0.208           |
| Atf4                                       | NM_009716                  | ref Mus musculus activating transcription factor 4 (Atf4), mRNA [NM_009716]                                                                                | 0.38             | 0.004   | 0.131           |
| chr1:175654606-175672031_R                 | chr1:175654606-175672031_R | lincRNA:chr1:175654606-175672031 reverse strand                                                                                                            | 0.38             | 0.008   | 0.184           |
| 4833405L11Rik                              | XM_001003488               | ref PREDICTED: Mus musculus RIKEN cDNA 4833405L11 gene (4833405L11Rik), mRNA [XM_001003488]                                                                | 0.38             | 0.009   | 0.201           |
| Otud1                                      | NM_027715                  | ref Mus musculus OTU domain containing 1 (Otud1), mRNA [NM_027715]                                                                                         | 0.38             | 0.011   | 0.221           |
| Lpar1                                      | NM_172989                  | ref Mus musculus lysophosphatidic acid receptor 1 (Lpar1), transcript variant 2, mRNA [NM_172989]                                                          | 0.38             | 0.025   | 0.332           |
| Gm2621                                     | XM_001474140               | ref PREDICTED: Mus musculus similar to steroid-binding protein C1 (LOC100040137), mRNA [XM_001474140]                                                      | 0.38             | 0.046   | 0.444           |
| chr5:22887983-22939658_R                   | chr5:22887983-22939658_R   | lincRNA:chr5:22887983-22939658 reverse strand                                                                                                              | 0.38             | 0.014   | 0.258           |
| chr1:71730016-71740391_R                   | chr1:71730016-71740391_R   | lincRNA:chr1:71730016-71740391 reverse strand                                                                                                              | 0.38             | 0.021   | 0.309           |
| Kng1                                       | NM_023125                  | ref Mus musculus kininogen 1 (Kng1), transcript variant 2, mRNA [NM_023125]                                                                                | 0.38             | 0.019   | 0.288           |
| Pfkfb                                      | NM_019703                  | ref Mus musculus phosphofructokinase, platelet (Pfkfb), mRNA [NM_019703]                                                                                   | 0.38             | 0.005   | 0.143           |



| Online Supplemental Table IV: Con-STZ Only |                            |                                                                                                                                                                                                 |                  |         |                 |
|--------------------------------------------|----------------------------|-------------------------------------------------------------------------------------------------------------------------------------------------------------------------------------------------|------------------|---------|-----------------|
| Gene Symbol                                | RefSeq                     | Description                                                                                                                                                                                     | logFC<br>Con-STZ | P-value | Adj.<br>P-value |
| Ang3                                       | NM_001123394               | ref Mus musculus angiogenin, ribonuclease A family, member 3 (Ang3), mRNA [NM_001123394]                                                                                                        | 0.38             | 0.015   | 0.259           |
| Lamc2                                      | NM_008485                  | ref Mus musculus laminin, gamma 2 (Lamc2), mRNA [NM_008485]                                                                                                                                     | 0.38             | 0.004   | 0.137           |
| Pld1                                       | NM_001164056               | ref Mus musculus phospholipase D1 (Pld1), transcript variant 1, mRNA [NM_001164056]                                                                                                             | 0.38             | 0.016   | 0.272           |
| chr6:131263850-131314850_F                 | chr6:131263850-131314850_F | lincRNA:chr6:131263850-131314850 forward strand                                                                                                                                                 | 0.38             | 0.017   | 0.279           |
| Sema6b                                     | NM_013662                  | ref Mus musculus sema domain, transmembrane domain (TM), and cytoplasmic domain, (semaphorin) 6B (Sema6b), transcript variant 1, mRNA [NM_013662]                                               | 0.38             | 0.020   | 0.295           |
| chr1:183832694-183834125_R                 | chr1:183832694-183834125_R | lincRNA:chr1:183832694-183834125 reverse strand                                                                                                                                                 | 0.38             | 0.005   | 0.154           |
| Nfatc1                                     | NM_016791                  | ref Mus musculus nuclear factor of activated T-cells, cytoplasmic, calcineurin-dependent 1 (Nfatc1), transcript variant 1, mRNA [NM_016791]                                                     | 0.38             | 0.041   | 0.421           |
| Slc1a5                                     | NM_009201                  | ref Mus musculus solute carrier family 1 (neutral amino acid transporter), member 5 (Slc1a5), mRNA [NM_009201]                                                                                  | 0.37             | 0.002   | 0.099           |
| Slc25a25                                   | NM_146118                  | ref Mus musculus solute carrier family 25 (mitochondrial carrier, phosphate carrier), member 25 (Slc25a25), nuclear gene encoding mitochondrial protein, transcript variant 1, mRNA [NM_146118] | 0.37             | 0.005   | 0.147           |
| ENSMUST00000094541                         | ENSMUST00000094541         | Unknown                                                                                                                                                                                         | 0.37             | 0.026   | 0.342           |
| Gm1574                                     | NM_001005422               | ref Mus musculus predicted gene 1574 (Gm1574), mRNA [NM_001005422]                                                                                                                              | 0.37             | 0.016   | 0.267           |
| chr13:75921214-75923024_F                  | chr13:75921214-75923024_F  | lincRNA:chr13:75921214-75923024 forward strand                                                                                                                                                  | 0.37             | 0.042   | 0.422           |
| Susd2                                      | NM_027890                  | ref Mus musculus sushi domain containing 2 (Susd2), transcript variant 1, mRNA [NM_027890]                                                                                                      | 0.37             | 0.014   | 0.255           |
| B4galt4                                    | NM_019804                  | ref Mus musculus UDP-Gal:betaGlcNAc beta 1,4-galactosyltransferase, polypeptide 4 (B4galt4), mRNA [NM_019804]                                                                                   | 0.37             | 0.008   | 0.193           |
| B4galt4                                    | NM_019804                  | ref Mus musculus UDP-Gal:betaGlcNAc beta 1,4-galactosyltransferase, polypeptide 4 (B4galt4), mRNA [NM_019804]                                                                                   | 0.37             | 0.035   | 0.391           |
| chr6:50339188-50409363_F                   | chr6:50339188-50409363_F   | lincRNA:chr6:50339188-50409363 forward strand                                                                                                                                                   | 0.37             | 0.047   | 0.446           |
| Ambp                                       | NM_007443                  | ref Mus musculus alpha 1 microglobulin/bikunin (Ambp), mRNA [NM_007443]                                                                                                                         | 0.37             | 0.008   | 0.189           |
| Gm6517                                     | XR_033841                  | ref PREDICTED: Mus musculus similar to MGC69457 protein (LOC624662), misc RNA [XR_033841]                                                                                                       | 0.37             | 0.001   | 0.074           |
| Cpa3                                       | NM_007753                  | ref Mus musculus carboxypeptidase A3, mast cell (Cpa3), mRNA [NM_007753]                                                                                                                        | 0.37             | 0.024   | 0.329           |
| Pde4dip                                    | NM_178080                  | ref Mus musculus phosphodiesterase 4D interacting protein (myomegalin) (Pde4dip), transcript variant 2, mRNA [NM_178080]                                                                        | 0.37             | 0.009   | 0.205           |
| Olf869                                     | NM_146557                  | ref Mus musculus olfactory receptor 869 (Olf869), mRNA [NM_146557]                                                                                                                              | 0.37             | 0.049   | 0.454           |
| Pde1a                                      | NM_001009978               | ref Mus musculus phosphodiesterase 1A, calmodulin-dependent (Pde1a), transcript variant 7, mRNA [NM_001009978]                                                                                  | 0.37             | 0.009   | 0.201           |
| Olfml1                                     | NM_172907                  | ref Mus musculus olfactomedin-like 1 (Olfml1), mRNA [NM_172907]                                                                                                                                 | 0.37             | 0.049   | 0.455           |
| Gm6372                                     | XR_030987                  | ref PREDICTED: Mus musculus similar to microsomal glutathione S-transferase 3 (LOC622952), misc RNA [XR_030987]                                                                                 | 0.37             | 0.002   | 0.096           |
| Gm5860                                     | XM_622347                  | ref PREDICTED: Mus musculus predicted gene, EG545641 (EG545641), mRNA [XM_622347]                                                                                                               | 0.37             | 0.003   | 0.109           |
| Il21r                                      | NM_021887                  | ref Mus musculus interleukin 21 receptor (Il21r), mRNA [NM_021887]                                                                                                                              | 0.37             | 0.045   | 0.440           |

| Online Supplemental Table IV: Con-STZ Only |                            |                                                                                                                                         |                      |         |                 |
|--------------------------------------------|----------------------------|-----------------------------------------------------------------------------------------------------------------------------------------|----------------------|---------|-----------------|
| Gene Symbol                                | RefSeq                     | Description                                                                                                                             | logFC<br>Con-<br>STZ | P-value | Adj.<br>P-value |
| ENSMUST00000114742                         | ENSMUST00000114742         | ens forkhead box R1 Gene [Source:MGI Symbol;Acc:MGI:2685961] [ENSMUST00000114742]                                                       | 0.37                 | 0.002   | 0.096           |
| chr3:88323145-88335770_F                   | chr3:88323145-88335770_F   | lincRNA:chr3:88323145-88335770 forward strand                                                                                           | 0.37                 | 0.035   | 0.389           |
| chr3:90425270-90435820_R                   | chr3:90425270-90435820_R   | lincRNA:chr3:90425270-90435820 reverse strand                                                                                           | 0.37                 | 0.033   | 0.376           |
| chr18:75513062-75523889_R                  | chr18:75513062-75523889_R  | lincRNA:chr18:75513062-75523889 reverse strand                                                                                          | 0.37                 | 0.050   | 0.457           |
| Olfr1140                                   | NM_146642                  | ref Mus musculus olfactory receptor 1140 (Olfr1140), mRNA [NM_146642]                                                                   | 0.37                 | 0.043   | 0.428           |
| Mbd5                                       | XM_001476481               | ref PREDICTED: Mus musculus hypothetical protein LOC100041508 (LOC100041508), mRNA [XM_001476481]                                       | 0.37                 | 0.027   | 0.348           |
| chr10:24269317-24270145_R                  | chr10:24269317-24270145_R  | lincRNA:chr10:24269317-24270145 reverse strand                                                                                          | 0.37                 | 0.037   | 0.400           |
| LOC100048309                               | XM_001479990               | ref PREDICTED: Mus musculus similar to interferon activated gene 204 (LOC100048309), mRNA [XM_001479990]                                | 0.37                 | 0.013   | 0.246           |
| chr13:37633225-37640309_F                  | chr13:37633225-37640309_F  | lincRNA:chr13:37633225-37640309 forward strand                                                                                          | 0.37                 | 0.040   | 0.413           |
| Pdlim5                                     | NM_019809                  | ref Mus musculus PDZ and LIM domain 5 (Pdlim5), transcript variant 2, mRNA [NM_019809]                                                  | 0.37                 | 0.017   | 0.278           |
| 2310016C08Rik                              | NM_023516                  | ref Mus musculus RIKEN cDNA 2310016C08 gene (2310016C08Rik), transcript variant 2, mRNA [NM_023516]                                     | 0.37                 | 0.001   | 0.067           |
| Cypt12                                     | NM_029289                  | ref Mus musculus cysteine-rich perinuclear theca 12 (Cypt12), mRNA [NM_029289]                                                          | 0.37                 | 0.041   | 0.420           |
| Nmur1                                      | NM_010341                  | ref Mus musculus neuromedin U receptor 1 (Nmur1), mRNA [NM_010341]                                                                      | 0.37                 | 0.021   | 0.304           |
| chr14:77006215-77063293_R                  | chr14:77006215-77063293_R  | lincRNA:chr14:77006215-77063293 reverse strand                                                                                          | 0.37                 | 0.039   | 0.409           |
| Gm2403                                     | XR_031386                  | ref PREDICTED: Mus musculus similar to LOC434536 protein (LOC100039749), misc RNA [XR_031386]                                           | 0.37                 | 0.041   | 0.422           |
| Chpf2                                      | NM_133913                  | ref Mus musculus chondroitin polymerizing factor 2 (Chpf2), mRNA [NM_133913]                                                            | 0.36                 | 0.008   | 0.189           |
| Rdh11                                      | NM_021557                  | ref Mus musculus retinol dehydrogenase 11 (Rdh11), mRNA [NM_021557]                                                                     | 0.36                 | 0.003   | 0.123           |
| chr6:052032838-052033444                   | chr6:052032838-052033444   | lincRNA:chr6:052032838-052033444 forward strand                                                                                         | 0.36                 | 0.049   | 0.456           |
| Slc12a8                                    | NM_134251                  | ref Mus musculus solute carrier family 12 (potassium/chloride transporters), member 8 (Slc12a8), transcript variant 1, mRNA [NM_134251] | 0.36                 | 0.033   | 0.376           |
| chr14:44151048-44156924_R                  | chr14:44151048-44156924_R  | lincRNA:chr14:44151048-44156924 reverse strand                                                                                          | 0.36                 | 0.012   | 0.237           |
| chr5:144517700-144526071_R                 | chr5:144517700-144526071_R | lincRNA:chr5:144517700-144526071 reverse strand                                                                                         | 0.36                 | 0.031   | 0.368           |
| Sdccag8                                    | NM_029756                  | ref Mus musculus serologically defined colon cancer antigen 8 (Sdccag8), mRNA [NM_029756]                                               | 0.36                 | 0.032   | 0.373           |
| Nuak1                                      | NM_001004363               | ref Mus musculus NUAKE family, SNF1-like kinase, 1 (Nuak1), mRNA [NM_001004363]                                                         | 0.36                 | 0.002   | 0.100           |
| 4930417M19Rik                              | NM_177195                  | ref Mus musculus RIKEN cDNA 4930417M19 gene (4930417M19Rik), mRNA [NM_177195]                                                           | 0.36                 | 0.036   | 0.391           |
| LOC634184                                  | XM_908838                  | ref PREDICTED: Mus musculus similar to T-cell receptor alpha precursor (LOC634184), mRNA [XM_908838]                                    | 0.36                 | 0.037   | 0.398           |
| Ybx1                                       | NM_011732                  | ref Mus musculus Y box protein 1 (Ybx1), mRNA [NM_011732]                                                                               | 0.36                 | 0.012   | 0.231           |
| Pla1a                                      | NM_134102                  | ref Mus musculus phospholipase A1 member A (Pla1a), mRNA [NM_134102]                                                                    | 0.36                 | 0.014   | 0.252           |
| Trim2                                      | NM_030706                  | ref Mus musculus tripartite motif-containing 2 (Trim2), mRNA [NM_030706]                                                                | 0.36                 | 0.022   | 0.311           |
| Nt5e                                       | NM_011851                  | ref Mus musculus 5' nucleotidase, ecto (Nt5e), mRNA [NM_011851]                                                                         | 0.36                 | 0.022   | 0.312           |

Online Supplemental Table IV: Con-STZ Only

| Gene Symbol               | RefSeq                    | Description                                                                                                                                                                                    | logFC<br>Con-<br>STZ | P-value | Adj.<br>P-value |
|---------------------------|---------------------------|------------------------------------------------------------------------------------------------------------------------------------------------------------------------------------------------|----------------------|---------|-----------------|
| 2310057M21Rik             | NM_026655                 | ref Mus musculus RIKEN cDNA 2310057M21 gene (2310057M21Rik), mRNA [NM_026655]                                                                                                                  | 0.36                 | 0.007   | 0.182           |
| Fxyd4                     | NM_033648                 | ref Mus musculus FXYD domain-containing ion transport regulator 4 (Fxyd4), transcript variant 1, mRNA [NM_033648]                                                                              | 0.36                 | 0.007   | 0.179           |
| Gm16476                   | XM_001480493              | ref PREDICTED: Mus musculus similar to development and differentiation enhancing factor 2 (LOC100043377), mRNA [XM_001480493]                                                                  | 0.36                 | 0.032   | 0.372           |
| chr10:6480075-6603900_F   | chr10:6480075-6603900_F   | lincRNA:chr10:6480075-6603900 forward strand                                                                                                                                                   | 0.36                 | 0.046   | 0.445           |
| Tbck                      | AK085971                  | gb Mus musculus 16 days neonate heart cDNA, RIKEN full-length enriched library, clone:D830035P19 product:Hypothetical leucine-rich region containing protein, full insert sequence. [AK085971] | 0.36                 | 0.048   | 0.450           |
| Slco2b1                   | NM_175316                 | ref Mus musculus solute carrier organic anion transporter family, member 2b1 (Slco2b1), mRNA [NM_175316]                                                                                       | 0.36                 | 0.010   | 0.216           |
| Srms                      | NM_011481                 | ref Mus musculus src-related kinase lacking C-terminal regulatory tyrosine and N-terminal myristylation sites (Srms), mRNA [NM_011481]                                                         | 0.36                 | 0.005   | 0.149           |
| Tmbim1                    | NM_027154                 | ref Mus musculus transmembrane BAX inhibitor motif containing 1 (Tmbim1), mRNA [NM_027154]                                                                                                     | 0.36                 | 0.005   | 0.155           |
| Lsp1                      | NM_019391                 | ref Mus musculus lymphocyte specific 1 (Lsp1), transcript variant 2, mRNA [NM_019391]                                                                                                          | 0.36                 | 0.039   | 0.409           |
| chr19:5771425-5848475_F   | chr19:5771425-5848475_F   | lincRNA:chr19:5771425-5848475 forward strand                                                                                                                                                   | 0.36                 | 0.044   | 0.434           |
| chr5:25168628-25185353_F  | chr5:25168628-25185353_F  | lincRNA:chr5:25168628-25185353 forward strand                                                                                                                                                  | 0.36                 | 0.036   | 0.395           |
| Dram1                     | NM_027878                 | ref Mus musculus DNA-damage regulated autophagy modulator 1 (Dram1), mRNA [NM_027878]                                                                                                          | 0.36                 | 0.033   | 0.379           |
| ENSMUST0000005957         | ENSMUST0000005957         | ref PREDICTED: Mus musculus predicted gene, EG383891 (EG383891), mRNA [XM_357312]                                                                                                              | 0.36                 | 0.019   | 0.294           |
| Anks1b                    | NM_001128086              | ref Mus musculus ankyrin repeat and sterile alpha motif domain containing 1B (Anks1b), transcript variant 1, mRNA [NM_001128086]                                                               | 0.36                 | 0.043   | 0.428           |
| Gstcd                     | NM_026231                 | ref Mus musculus glutathione S-transferase, C-terminal domain containing (Gstcd), mRNA [NM_026231]                                                                                             | 0.36                 | 0.040   | 0.414           |
| Olf952                    | NM_146503                 | ref Mus musculus olfactory receptor 952 (Olf952), mRNA [NM_146503]                                                                                                                             | 0.36                 | 0.031   | 0.368           |
| Mtmr10                    | NM_172742                 | ref Mus musculus myotubularin related protein 10 (Mtmr10), mRNA [NM_172742]                                                                                                                    | 0.36                 | 0.019   | 0.288           |
| chr16:25517037-25531362_F | chr16:25517037-25531362_F | lincRNA:chr16:25517037-25531362 forward strand                                                                                                                                                 | 0.36                 | 0.050   | 0.457           |
| Msmg                      | NM_001099314              | ref Mus musculus microseminoprotein, prostate associated (Msmg), mRNA [NM_001099314]                                                                                                           | 0.36                 | 0.010   | 0.213           |
| Dnase1l2                  | NM_025718                 | ref Mus musculus deoxyribonuclease 1-like 2 (Dnase1l2), mRNA [NM_025718]                                                                                                                       | 0.36                 | 0.021   | 0.304           |
| chr17:71242333-71273533_F | chr17:71242333-71273533_F | lincRNA:chr17:71242333-71273533 forward strand                                                                                                                                                 | 0.36                 | 0.019   | 0.288           |
| Ick                       | NM_019987                 | ref Mus musculus intestinal cell kinase (Ick), transcript variant 2, mRNA [NM_019987]                                                                                                          | 0.36                 | 0.043   | 0.428           |
| Gm4468                    | XR_034019                 | ref PREDICTED: Mus musculus similar to ribosomal protein L37 (LOC100047378), misc RNA [XR_034019]                                                                                              | 0.36                 | 0.047   | 0.446           |
| Creb3l2                   | NM_178661                 | ref Mus musculus cAMP responsive element binding protein 3-like 2 (Creb3l2), mRNA [NM_178661]                                                                                                  | 0.36                 | 0.006   | 0.157           |
| Atxn10                    | NM_016843                 | ref Mus musculus ataxin 10 (Atxn10), mRNA [NM_016843]                                                                                                                                          | 0.36                 | 0.022   | 0.315           |
| chr2:75444518-75497268_F  | chr2:75444518-75497268_F  | lincRNA:chr2:75444518-75497268 forward strand                                                                                                                                                  | 0.36                 | 0.044   | 0.436           |
| Star                      | NM_011485                 | ref Mus musculus steroidogenic acute regulatory protein (Star), nuclear gene encoding mitochondrial protein, mRNA [NM_011485]                                                                  | 0.36                 | 0.007   | 0.176           |

| Online Supplemental Table IV: Con-STZ Only |                            |                                                                                                                                |                  |         |                 |
|--------------------------------------------|----------------------------|--------------------------------------------------------------------------------------------------------------------------------|------------------|---------|-----------------|
| Gene Symbol                                | RefSeq                     | Description                                                                                                                    | logFC<br>Con-STZ | P-value | Adj.<br>P-value |
| chr17:88466300-88495175_F                  | chr17:88466300-88495175_F  | lincRNA:chr17:88466300-88495175 forward strand                                                                                 | 0.36             | 0.043   | 0.429           |
| Mgst3                                      | NM_025569                  | ref Mus musculus microsomal glutathione S-transferase 3 (Mgst3), mRNA [NM_025569]                                              | 0.35             | 0.005   | 0.154           |
| BC053749                                   | NM_183321                  | ref Mus musculus cDNA sequence BC053749 (BC053749), mRNA [NM_183321]                                                           | 0.35             | 0.003   | 0.118           |
| Slc13a4                                    | NM_172892                  | ref Mus musculus solute carrier family 13 (sodium/sulfate symporters), member 4 (Slc13a4), mRNA [NM_172892]                    | 0.35             | 0.038   | 0.406           |
| chr11:68200716-68214458_R                  | chr11:68200716-68214458_R  | lincRNA:chr11:68200716-68214458 reverse strand                                                                                 | 0.35             | 0.049   | 0.453           |
| ENSMUST00000035327                         | ENSMUST00000035327         | ens RIKEN cDNA 4930529M08 gene Gene [Source:MGI Symbol;Acc:MGI:1926024] [ENSMUST00000035327]                                   | 0.35             | 0.016   | 0.273           |
| Cpm                                        | NM_027468                  | ref Mus musculus carboxypeptidase M (Cpm), mRNA [NM_027468]                                                                    | 0.35             | 0.026   | 0.337           |
| ENSMUST00000051043                         | ENSMUST00000051043         | ens RIKEN cDNA C130073F10 gene Gene [Source:MGI Symbol;Acc:MGI:3045359] [ENSMUST00000051043]                                   | 0.35             | 0.017   | 0.278           |
| Celsr3                                     | NM_080437                  | ref Mus musculus cadherin, EGF LAG seven-pass G-type receptor 3 (flamingo homolog, Drosophila) (Celsr3), mRNA [NM_080437]      | 0.35             | 0.042   | 0.424           |
| Nfe2l2                                     | NM_010902                  | ref Mus musculus nuclear factor, erythroid derived 2, like 2 (Nfe2l2), mRNA [NM_010902]                                        | 0.35             | 0.010   | 0.208           |
| Spns2                                      | NM_153060                  | ref Mus musculus spinster homolog 2 (Drosophila) (Spns2), mRNA [NM_153060]                                                     | 0.35             | 0.018   | 0.282           |
| Gm7660                                     | XR_031289                  | ref PREDICTED: Mus musculus similar to UDP glucuronosyltransferase 2 family, polypeptide B36 (LOC665494), misc RNA [XR_031289] | 0.35             | 0.028   | 0.350           |
| 1810032O08Rik                              | NR_027821                  | ref Mus musculus RIKEN cDNA 1810032O08 gene (1810032O08Rik), transcript variant 3, non-coding RNA [NR_027821]                  | 0.35             | 0.002   | 0.099           |
| Zbtb26                                     | NM_199025                  | ref Mus musculus zinc finger and BTB domain containing 26 (Zbtb26), mRNA [NM_199025]                                           | 0.35             | 0.045   | 0.438           |
| Pi4k2b                                     | NM_025951                  | ref Mus musculus phosphatidylinositol 4-kinase type 2 beta (Pi4k2b), transcript variant 1, mRNA [NM_025951]                    | 0.35             | 0.010   | 0.213           |
| Ly6a                                       | NM_010738                  | ref Mus musculus lymphocyte antigen 6 complex, locus A (Ly6a), mRNA [NM_010738]                                                | 0.35             | 0.006   | 0.162           |
| Cdc25b                                     | NM_023117                  | ref Mus musculus cell division cycle 25 homolog B (S. pombe) (Cdc25b), transcript variant 1, mRNA [NM_023117]                  | 0.35             | 0.007   | 0.176           |
| 4921528I07Rik                              | XM_912353                  | ref PREDICTED: Mus musculus RIKEN cDNA 4921528I07 gene (4921528I07Rik), mRNA [XM_912353]                                       | 0.35             | 0.045   | 0.439           |
| Socs2                                      | NM_007706                  | ref Mus musculus suppressor of cytokine signaling 2 (Socs2), transcript variant 1, mRNA [NM_007706]                            | 0.35             | 0.007   | 0.178           |
| Pdlim7                                     | NM_001114088               | ref Mus musculus PDZ and LIM domain 7 (Pdlim7), transcript variant a, mRNA [NM_001114088]                                      | 0.35             | 0.003   | 0.113           |
| Pros1                                      | NM_011173                  | ref Mus musculus protein S (alpha) (Pros1), mRNA [NM_011173]                                                                   | 0.35             | 0.005   | 0.148           |
| LOC100047802                               | XM_001478887               | ref PREDICTED: Mus musculus hypothetical protein LOC100047802 (LOC100047802), mRNA [XM_001478887]                              | 0.35             | 0.033   | 0.380           |
| Tmem176b                                   | NM_023056                  | ref Mus musculus transmembrane protein 176B (Tmem176b), transcript variant 1, mRNA [NM_023056]                                 | 0.35             | 0.032   | 0.374           |
| chr2:94017095-94019092_R                   | chr2:94017095-94019092_R   | lincRNA:chr2:94017095-94019092 reverse strand                                                                                  | 0.35             | 0.045   | 0.439           |
| Tnxb                                       | NM_031176                  | ref Mus musculus tenascin XB (Tnxb), mRNA [NM_031176]                                                                          | 0.35             | 0.043   | 0.428           |
| Mil2                                       | NM_001033276               | ref Mus musculus myeloid/lymphoid or mixed-lineage leukemia 2 (Mil2), mRNA [NM_001033276]                                      | 0.35             | 0.023   | 0.322           |
| chr1:183832694-183834125_R                 | chr1:183832694-183834125_R | lincRNA:chr1:183832694-183834125 reverse strand                                                                                | 0.35             | 0.006   | 0.166           |
| Serinc3                                    | NM_012032                  | ref Mus musculus serine incorporator 3 (Serinc3), mRNA [NM_012032]                                                             | 0.35             | 0.048   | 0.449           |

| Online Supplemental Table IV: Con-STZ Only |                             |                                                                                                                                     |                  |         |                 |
|--------------------------------------------|-----------------------------|-------------------------------------------------------------------------------------------------------------------------------------|------------------|---------|-----------------|
| Gene Symbol                                | RefSeq                      | Description                                                                                                                         | logFC<br>Con-STZ | P-value | Adj.<br>P-value |
| chr13:112717680-112733330_F                | chr13:112717680-112733330_F | lincRNA:chr13:112717680-112733330 forward strand                                                                                    | 0.35             | 0.034   | 0.380           |
| Snx4                                       | NM_080557                   | ref Mus musculus sorting nexin 4 (Snx4), mRNA [NM_080557]                                                                           | 0.35             | 0.018   | 0.287           |
| Elttd1                                     | NM_133222                   | ref Mus musculus EGF, latrophilin seven transmembrane domain containing 1 (Elttd1), mRNA [NM_133222]                                | 0.35             | 0.021   | 0.303           |
| Tbx20                                      | NM_020496                   | ref Mus musculus T-box 20 (Tbx20), transcript variant 2, mRNA [NM_020496]                                                           | 0.35             | 0.013   | 0.245           |
| Eps8                                       | NM_007945                   | ref Mus musculus epidermal growth factor receptor pathway substrate 8 (Eps8), mRNA [NM_007945]                                      | 0.35             | 0.020   | 0.295           |
| chr6:99472981-99484210_R                   | chr6:99472981-99484210_R    | lincRNA:chr6:99472981-99484210 reverse strand                                                                                       | 0.35             | 0.024   | 0.327           |
| chr12:110944403-110988678_F                | chr12:110944403-110988678_F | lincRNA:chr12:110944403-110988678 forward strand                                                                                    | 0.35             | 0.036   | 0.394           |
| Clnk                                       | NM_013748                   | ref Mus musculus cytokine-dependent hematopoietic cell linker (Clnk), mRNA [NM_013748]                                              | 0.35             | 0.024   | 0.325           |
| Uap1                                       | NM_133806                   | ref Mus musculus UDP-N-acetylglucosamine pyrophosphorylase 1 (Uap1), mRNA [NM_133806]                                               | 0.35             | 0.022   | 0.314           |
| ENSMUST00000106702                         | ENSMUST00000106702          | ens guanine nucleotide binding protein, alpha 13 Gene [Source:MGI (curated);Acc:MGI:95768] [ENSMUST00000106702]                     | 0.34             | 0.006   | 0.166           |
| C1qtnf1                                    | NM_019959                   | ref Mus musculus C1q and tumor necrosis factor related protein 1 (C1qtnf1), mRNA [NM_019959]                                        | 0.34             | 0.004   | 0.134           |
| chr12:73860757-73862034_R                  | chr12:73860757-73862034_R   | lincRNA:chr12:73860757-73862034 reverse strand                                                                                      | 0.34             | 0.032   | 0.373           |
| Slco5a1                                    | NM_172841                   | ref Mus musculus solute carrier organic anion transporter family, member 5A1 (Slco5a1), mRNA [NM_172841]                            | 0.34             | 0.029   | 0.354           |
| Midn                                       | NM_021565                   | ref Mus musculus midnolin (Midn), mRNA [NM_021565]                                                                                  | 0.34             | 0.028   | 0.348           |
| ENSMUST0000023246                          | ENSMUST0000023246           | ens lymphocyte antigen 6 complex, locus G Gene [Source:MGI Symbol;Acc:MGI:109440] [ENSMUST0000023246]                               | 0.34             | 0.034   | 0.385           |
| Mustn1                                     | NM_181390                   | ref Mus musculus musculoskeletal, embryonic nuclear protein 1 (Mustn1), mRNA [NM_181390]                                            | 0.34             | 0.022   | 0.315           |
| Fcgr4                                      | NM_144559                   | ref Mus musculus Fc receptor, IgG, low affinity IV (Fcgr4), mRNA [NM_144559]                                                        | 0.34             | 0.017   | 0.279           |
| Ube2g2                                     | NM_019803                   | ref Mus musculus ubiquitin-conjugating enzyme E2G 2 (Ube2g2), mRNA [NM_019803]                                                      | 0.34             | 0.023   | 0.316           |
| Gm9915                                     | ENSMUST00000066196          | ens Putative uncharacterized protein [Source:UniProtKB/TrEMBL;Acc:Q8C7Y0] [ENSMUST00000066196]                                      | 0.34             | 0.007   | 0.178           |
| Dnajb4                                     | NM_027287                   | ref Mus musculus DnaJ (Hsp40) homolog, subfamily B, member 4 (Dnajb4), mRNA [NM_027287]                                             | 0.34             | 0.005   | 0.145           |
| chr1:94077221-94091396_R                   | chr1:94077221-94091396_R    | lincRNA:chr1:94077221-94091396 reverse strand                                                                                       | 0.34             | 0.023   | 0.321           |
| Pemt                                       | NM_008819                   | ref Mus musculus phosphatidylethanolamine N-methyltransferase (Pemt), nuclear gene encoding mitochondrial protein, mRNA [NM_008819] | 0.34             | 0.011   | 0.225           |
| Smad6                                      | NM_008542                   | ref Mus musculus MAD homolog 6 (Drosophila) (Smad6), mRNA [NM_008542]                                                               | 0.34             | 0.014   | 0.254           |
| Napb                                       | NM_019632                   | ref Mus musculus N-ethylmaleimide sensitive fusion protein attachment protein beta (Napb), mRNA [NM_019632]                         | 0.34             | 0.004   | 0.141           |
| Maged2                                     | NM_030700                   | ref Mus musculus melanoma antigen, family D, 2 (Maged2), mRNA [NM_030700]                                                           | 0.34             | 0.008   | 0.191           |
| chr15:10363330-10371830_F                  | chr15:10363330-10371830_F   | lincRNA:chr15:10363330-10371830 forward strand                                                                                      | 0.34             | 0.021   | 0.304           |
| chr2:176908707-176991202_R                 | chr2:176908707-176991202_R  | lincRNA:chr2:176908707-176991202 reverse strand                                                                                     | 0.34             | 0.026   | 0.335           |
| Lin7a                                      | NM_001039354                | ref Mus musculus lin-7 homolog A (C. elegans) (Lin7a), transcript variant 1, mRNA [NM_001039354]                                    | 0.34             | 0.041   | 0.422           |

Online Supplemental Table IV: Con-STZ Only

| Gene Symbol               | RefSeq                    | Description                                                                                                                                                                                           | logFC<br>Con-STZ | P-value | Adj.<br>P-value |
|---------------------------|---------------------------|-------------------------------------------------------------------------------------------------------------------------------------------------------------------------------------------------------|------------------|---------|-----------------|
| chr8:26343277-26352902_F  | chr8:26343277-26352902_F  | lincRNA:chr8:26343277-26352902 forward strand                                                                                                                                                         | 0.34             | 0.009   | 0.195           |
| Slc1a5                    | NM_009201                 | ref Mus musculus solute carrier family 1 (neutral amino acid transporter), member 5 (Slc1a5), mRNA [NM_009201]                                                                                        | 0.34             | 0.015   | 0.263           |
| Cdc42bpa                  | NM_001033285              | ref Mus musculus CDC42 binding protein kinase alpha (Cdc42bpa), mRNA [NM_001033285]                                                                                                                   | 0.34             | 0.007   | 0.179           |
| LOC100047967              | XR_034463                 | ref PREDICTED: Mus musculus similar to growth arrest-specific 2 like 3 (LOC100047967), misc RNA [XR_034463]                                                                                           | 0.34             | 0.017   | 0.279           |
| Xbp1                      | NM_013842                 | ref Mus musculus X-box binding protein 1 (Xbp1), mRNA [NM_013842]                                                                                                                                     | 0.34             | 0.010   | 0.208           |
| Kcnk6                     | NM_001033525              | ref Mus musculus potassium inwardly-rectifying channel, subfamily K, member 6 (Kcnk6), mRNA [NM_001033525]                                                                                            | 0.34             | 0.004   | 0.138           |
| chr15:58928225-58939975_R | chr15:58928225-58939975_R | lincRNA:chr15:58928225-58939975 reverse strand                                                                                                                                                        | 0.34             | 0.035   | 0.387           |
| Mgst3                     | NM_025569                 | ref Mus musculus microsomal glutathione S-transferase 3 (Mgst3), mRNA [NM_025569]                                                                                                                     | 0.34             | 0.001   | 0.060           |
| Rsph6a                    | NM_031255                 | ref Mus musculus radial spoke head 6 homolog A (Chlamydomonas) (Rsph6a), transcript variant 1, mRNA [NM_031255]                                                                                       | 0.34             | 0.021   | 0.304           |
| chr18:5162836-5165729_R   | chr18:5162836-5165729_R   | lincRNA:chr18:5162836-5165729 reverse strand                                                                                                                                                          | 0.34             | 0.027   | 0.343           |
| Cpt1c                     | NM_153679                 | ref Mus musculus carnitine palmitoyltransferase 1c (Cpt1c), mRNA [NM_153679]                                                                                                                          | 0.34             | 0.031   | 0.368           |
| chr17:15357376-15385701_F | chr17:15357376-15385701_F | lincRNA:chr17:15357376-15385701 forward strand                                                                                                                                                        | 0.34             | 0.042   | 0.423           |
| chr13:23519843-23522887_R | chr13:23519843-23522887_R | lincRNA:chr13:23519843-23522887 reverse strand                                                                                                                                                        | 0.34             | 0.037   | 0.398           |
| LOC636328                 | XM_922121                 | ref PREDICTED: Mus musculus hypothetical LOC636328 (LOC636328), mRNA [XM_922121]                                                                                                                      | 0.34             | 0.044   | 0.432           |
| chr18:78190463-78235438_R | chr18:78190463-78235438_R | lincRNA:chr18:78190463-78235438 reverse strand                                                                                                                                                        | 0.34             | 0.046   | 0.444           |
| 3830612M24                | AK028406                  | gb Mus musculus 18 days pregnant adult female placenta and extra embryonic tissue cDNA, RIKEN full-length enriched library, clone:3830612M24 product:unclassifiable, full insert sequence. [AK028406] | 0.34             | 0.016   | 0.272           |
| Zfyve28                   | ENSMUST00000094868        | ens zinc finger, FYVE domain containing 28 Gene [Source:MGI (curated);Acc:MGI:2684992] [ENSMUST00000094868]                                                                                           | 0.34             | 0.048   | 0.450           |
| ENSMUST00000089689        | ENSMUST00000089689        | Unknown                                                                                                                                                                                               | 0.34             | 0.041   | 0.420           |
| chr15:32167516-32174417_R | chr15:32167516-32174417_R | lincRNA:chr15:32167516-32174417 reverse strand                                                                                                                                                        | 0.34             | 0.033   | 0.380           |
| Clec18a                   | NM_181549                 | ref Mus musculus C-type lectin domain family 18, member A (Clec18a), mRNA [NM_181549]                                                                                                                 | 0.34             | 0.050   | 0.457           |
| chr17:22332475-22362150_F | chr17:22332475-22362150_F | lincRNA:chr17:22332475-22362150 forward strand                                                                                                                                                        | 0.34             | 0.033   | 0.376           |
| Adarb1                    | NM_001024837              | ref Mus musculus adenosine deaminase, RNA-specific, B1 (Adarb1), transcript variant 2, mRNA [NM_001024837]                                                                                            | 0.34             | 0.009   | 0.203           |
| Lzts2                     | NM_145503                 | ref Mus musculus leucine zipper, putative tumor suppressor 2 (Lzts2), transcript variant 1, mRNA [NM_145503]                                                                                          | 0.33             | 0.014   | 0.256           |
| Vit                       | NM_028813                 | ref Mus musculus vitrin (Vit), mRNA [NM_028813]                                                                                                                                                       | 0.33             | 0.006   | 0.161           |
| Rhoj                      | NM_023275                 | ref Mus musculus ras homolog gene family, member J (Rhoj), mRNA [NM_023275]                                                                                                                           | 0.33             | 0.006   | 0.157           |
| Ror2                      | NM_013846                 | ref Mus musculus receptor tyrosine kinase-like orphan receptor 2 (Ror2), mRNA [NM_013846]                                                                                                             | 0.33             | 0.016   | 0.273           |
| Grk4                      | NM_019497                 | ref Mus musculus G protein-coupled receptor kinase 4 (Grk4), transcript variant 1, mRNA [NM_019497]                                                                                                   | 0.33             | 0.033   | 0.377           |



| Online Supplemental Table IV: Con-STZ Only |                           |                                                                                                                                  |                  |         |                 |
|--------------------------------------------|---------------------------|----------------------------------------------------------------------------------------------------------------------------------|------------------|---------|-----------------|
| Gene Symbol                                | RefSeq                    | Description                                                                                                                      | logFC<br>Con-STZ | P-value | Adj.<br>P-value |
| Fscn3                                      | NM_019569                 | ref Mus musculus fascin homolog 3, actin-bundling protein, testicular (Strongylocentrotus purpuratus) (Fscn3), mRNA [NM_019569]  | 0.33             | 0.043   | 0.429           |
| Sema7a                                     | NM_011352                 | ref Mus musculus sema domain, immunoglobulin domain (Ig), and GPI membrane anchor, (semaphorin) 7A (Sema7a), mRNA [NM_011352]    | 0.33             | 0.034   | 0.383           |
| Rnf19b                                     | ENSMUST00000030584        | ens ring finger protein 19B Gene [Source:MGI (curated);Acc:MGI:1922484] [ENSMUST00000030584]                                     | 0.33             | 0.010   | 0.212           |
| Runx1                                      | NM_001111022              | ref Mus musculus runt related transcription factor 1 (Runx1), transcript variant 2, mRNA [NM_001111022]                          | 0.33             | 0.025   | 0.332           |
| Acsf2                                      | NM_153807                 | ref Mus musculus acyl-CoA synthetase family member 2 (Acsf2), mRNA [NM_153807]                                                   | 0.33             | 0.018   | 0.283           |
| Krtdap                                     | NM_001033131              | ref Mus musculus keratinocyte differentiation associated protein (Krtdap), mRNA [NM_001033131]                                   | 0.33             | 0.032   | 0.373           |
| Ltbp3                                      | NM_008520                 | ref Mus musculus latent transforming growth factor beta binding protein 3 (Ltbp3), mRNA [NM_008520]                              | 0.33             | 0.004   | 0.138           |
| Svs3a                                      | NM_021363                 | ref Mus musculus seminal vesicle secretory protein 3A (Svs3a), mRNA [NM_021363]                                                  | 0.33             | 0.031   | 0.369           |
| Akap2                                      | NM_001035533              | ref Mus musculus A kinase (PRKA) anchor protein 2 (Akap2), transcript variant 1, mRNA [NM_001035533]                             | 0.33             | 0.014   | 0.249           |
| Napepld                                    | NM_178728                 | ref Mus musculus N-acyl phosphatidylethanolamine phospholipase D (Napepld), mRNA [NM_178728]                                     | 0.33             | 0.008   | 0.184           |
| H6pd                                       | NM_173371                 | ref Mus musculus hexose-6-phosphate dehydrogenase (glucose 1-dehydrogenase) (H6pd), mRNA [NM_173371]                             | 0.33             | 0.002   | 0.104           |
| Plbd2                                      | NM_023625                 | ref Mus musculus phospholipase B domain containing 2 (Plbd2), mRNA [NM_023625]                                                   | 0.33             | 0.003   | 0.106           |
| Inpp5d                                     | NM_010566                 | ref Mus musculus inositol polyphosphate-5-phosphatase D (Inpp5d), transcript variant 1, mRNA [NM_010566]                         | 0.33             | 0.029   | 0.358           |
| chr17:13008796-13023201_F                  | chr17:13008796-13023201_F | lincRNA:chr17:13008796-13023201 forward strand                                                                                   | 0.33             | 0.021   | 0.308           |
| Scpep1                                     | BC021399                  | gb Mus musculus serine carboxypeptidase 1, mRNA (cDNA clone MGC:29291 IMAGE:4193674), complete cds. [BC021399]                   | 0.33             | 0.026   | 0.335           |
| Enah                                       | NM_010135                 | ref Mus musculus enabled homolog (Drosophila) (Enah), transcript variant 1, mRNA [NM_010135]                                     | 0.33             | 0.011   | 0.226           |
| Etv4                                       | NM_008815                 | ref Mus musculus ets variant gene 4 (E1A enhancer binding protein, E1AF) (Etv4), mRNA [NM_008815]                                | 0.33             | 0.029   | 0.353           |
| Rrp12                                      | NM_199447                 | ref Mus musculus ribosomal RNA processing 12 homolog (S. cerevisiae) (Rrp12), mRNA [NM_199447]                                   | 0.33             | 0.007   | 0.175           |
| Plvap                                      | NM_032398                 | ref Mus musculus plasmalemma vesicle associated protein (Plvap), mRNA [NM_032398]                                                | 0.33             | 0.024   | 0.328           |
| Socs2                                      | NM_007706                 | ref Mus musculus suppressor of cytokine signaling 2 (Socs2), transcript variant 1, mRNA [NM_007706]                              | 0.33             | 0.013   | 0.244           |
| Plxdc2                                     | NM_026162                 | ref Mus musculus plexin domain containing 2 (Plxdc2), mRNA [NM_026162]                                                           | 0.33             | 0.002   | 0.081           |
| Sprr2f                                     | NM_011472                 | ref Mus musculus small proline-rich protein 2F (Sprr2f), mRNA [NM_011472]                                                        | 0.33             | 0.023   | 0.316           |
| Rfxank                                     | NM_011266                 | ref Mus musculus regulatory factor X-associated ankyrin-containing protein (Rfxank), transcript variant 1, mRNA [NM_011266]      | 0.33             | 0.003   | 0.123           |
| Slc11a1                                    | NM_013612                 | ref Mus musculus solute carrier family 11 (proton-coupled divalent metal ion transporters), member 1 (Slc11a1), mRNA [NM_013612] | 0.33             | 0.012   | 0.235           |
| chr8:26343277-26352902_F                   | chr8:26343277-26352902_F  | lincRNA:chr8:26343277-26352902 forward strand                                                                                    | 0.33             | 0.024   | 0.323           |
| Pdlim2                                     | NM_145978                 | ref Mus musculus PDZ and LIM domain 2 (Pdlim2), mRNA [NM_145978]                                                                 | 0.33             | 0.016   | 0.268           |
| Eya2                                       | NM_010165                 | ref Mus musculus eyes absent 2 homolog (Drosophila) (Eya2), mRNA [NM_010165]                                                     | 0.33             | 0.036   | 0.392           |
| chr17:22862669-22872347_F                  | chr17:22862669-22872347_F | lincRNA:chr17:22862669-22872347 forward strand                                                                                   | 0.33             | 0.049   | 0.455           |
| chr17:13008796-13023201_F                  | chr17:13008796-13023201_F | lincRNA:chr17:13008796-13023201 forward strand                                                                                   | 0.33             | 0.016   | 0.274           |

| Online Supplemental Table IV: Con-STZ Only |                            |                                                                                                                                                                       |                      |         |                 |
|--------------------------------------------|----------------------------|-----------------------------------------------------------------------------------------------------------------------------------------------------------------------|----------------------|---------|-----------------|
| Gene Symbol                                | RefSeq                     | Description                                                                                                                                                           | logFC<br>Con-<br>STZ | P-value | Adj.<br>P-value |
| Gm5480                                     | XM_488763                  | ref PREDICTED: Mus musculus predicted gene, EG432995 (EG432995), mRNA [XM_488763]                                                                                     | 0.33                 | 0.027   | 0.347           |
| Gstm4                                      | NM_026764                  | ref Mus musculus glutathione S-transferase, mu 4 (Gstm4), transcript variant 1, mRNA [NM_026764]                                                                      | 0.33                 | 0.016   | 0.274           |
| Mtap1a                                     | NM_032393                  | ref Mus musculus microtubule-associated protein 1 A (Mtap1a), transcript variant 1, mRNA [NM_032393]                                                                  | 0.33                 | 0.043   | 0.430           |
| Asph                                       | NM_001177850               | ref Mus musculus aspartate-beta-hydroxylase (Asph), transcript variant 4, mRNA [NM_001177850]                                                                         | 0.33                 | 0.007   | 0.179           |
| Pde2a                                      | NM_001143848               | ref Mus musculus phosphodiesterase 2A, cGMP-stimulated (Pde2a), transcript variant 1, mRNA [NM_001143848]                                                             | 0.33                 | 0.017   | 0.278           |
| chr11:82588507-82594501_R                  | chr11:82588507-82594501_R  | lincRNA:chr11:82588507-82594501 reverse strand                                                                                                                        | 0.33                 | 0.019   | 0.289           |
| Fam13a                                     | NM_153574                  | ref Mus musculus family with sequence similarity 13, member A (Fam13a), mRNA [NM_153574]                                                                              | 0.33                 | 0.010   | 0.208           |
| Anxa5                                      | NM_009673                  | ref Mus musculus annexin A5 (Anxa5), mRNA [NM_009673]                                                                                                                 | 0.33                 | 0.003   | 0.124           |
| chr1:175654606-175672031_R                 | chr1:175654606-175672031_R | lincRNA:chr1:175654606-175672031 reverse strand                                                                                                                       | 0.32                 | 0.029   | 0.353           |
| chr16:64796849-64843249_R                  | chr16:64796849-64843249_R  | lincRNA:chr16:64796849-64843249 reverse strand                                                                                                                        | 0.32                 | 0.039   | 0.412           |
| ENSMUST00000100778                         | ENSMUST00000100778         | ens predicted gene 6288 Gene [Source:MGI Symbol;Acc:MGI:3646376] [ENSMUST00000100778]                                                                                 | 0.32                 | 0.019   | 0.290           |
| ENSMUST00000110394                         | ENSMUST00000110394         | ens adaptor-related protein complex AP-4, epsilon 1 Gene [Source:MGI (curated);Acc:MGI:1336993] [ENSMUST00000110394]                                                  | 0.32                 | 0.015   | 0.265           |
| Cyp2c44                                    | NM_001001446               | ref Mus musculus cytochrome P450, family 2, subfamily c, polypeptide 44 (Cyp2c44), transcript variant 1, mRNA [NM_001001446]                                          | 0.32                 | 0.023   | 0.319           |
| Glis2                                      | NM_031184                  | ref Mus musculus GLIS family zinc finger 2 (Glis2), mRNA [NM_031184]                                                                                                  | 0.32                 | 0.042   | 0.424           |
| Gclc                                       | NM_010295                  | ref Mus musculus glutamate-cysteine ligase, catalytic subunit (Gclc), mRNA [NM_010295]                                                                                | 0.32                 | 0.045   | 0.439           |
| Gm12888                                    | NM_001033791               | ref Mus musculus predicted gene 12888 (Gm12888), mRNA [NM_001033791]                                                                                                  | 0.32                 | 0.017   | 0.279           |
| chr1:183832694-183834125_R                 | chr1:183832694-183834125_R | lincRNA:chr1:183832694-183834125 reverse strand                                                                                                                       | 0.32                 | 0.024   | 0.327           |
| Uhrf2                                      | NM_144873                  | ref Mus musculus ubiquitin-like, containing PHD and RING finger domains 2 (Uhrf2), mRNA [NM_144873]                                                                   | 0.32                 | 0.028   | 0.350           |
| Camta1                                     | NM_001081557               | ref Mus musculus calmodulin binding transcription activator 1 (Camta1), transcript variant 1, mRNA [NM_001081557]                                                     | 0.32                 | 0.010   | 0.208           |
| Aldh9a1                                    | NM_019993                  | ref Mus musculus aldehyde dehydrogenase 9, subfamily A1 (Aldh9a1), mRNA [NM_019993]                                                                                   | 0.32                 | 0.012   | 0.237           |
| Ly9                                        | NM_008534                  | ref Mus musculus lymphocyte antigen 9 (Ly9), mRNA [NM_008534]                                                                                                         | 0.32                 | 0.011   | 0.228           |
| ENSMUST00000115304                         | ENSMUST00000115304         | ens transformation related protein 63 Gene [Source:MGI (curated);Acc:MGI:1330810] [ENSMUST00000115304]                                                                | 0.32                 | 0.049   | 0.452           |
| chr5:77188300-77205150_F                   | chr5:77188300-77205150_F   | lincRNA:chr5:77188300-77205150 forward strand                                                                                                                         | 0.32                 | 0.031   | 0.368           |
| Nudt16                                     | NM_029385                  | ref Mus musculus nudix (nucleoside diphosphate linked moiety X)-type motif 16 (Nudt16), mRNA [NM_029385]                                                              | 0.32                 | 0.011   | 0.226           |
| Cep170                                     | NM_001099637               | ref Mus musculus centrosomal protein 170 (Cep170), mRNA [NM_001099637]                                                                                                | 0.32                 | 0.026   | 0.339           |
| Nlrp4c                                     | NM_031389                  | ref Mus musculus NLR family, pyrin domain containing 4C (Nlrp4c), mRNA [NM_031389]                                                                                    | 0.32                 | 0.049   | 0.454           |
| Cdc42se1                                   | NM_001038708               | ref Mus musculus CDC42 small effector 1 (Cdc42se1), transcript variant 2, mRNA [NM_001038708]                                                                         | 0.32                 | 0.012   | 0.236           |
| B830008H07Rik                              | AK046787                   | gb Mus musculus 10 days neonate medulla oblongata cDNA, RIKEN full-length enriched library, clone:B830008H07 product:unclassifiable, full insert sequence. [AK046787] | 0.32                 | 0.004   | 0.130           |

| Online Supplemental Table IV: Con-STZ Only |                             |                                                                                                                                                              |                  |         |                 |
|--------------------------------------------|-----------------------------|--------------------------------------------------------------------------------------------------------------------------------------------------------------|------------------|---------|-----------------|
| Gene Symbol                                | RefSeq                      | Description                                                                                                                                                  | logFC<br>Con-STZ | P-value | Adj.<br>P-value |
| chr13:62376235-62376890_F                  | chr13:62376235-62376890_F   | lincRNA:chr13:62376235-62376890 forward strand                                                                                                               | 0.32             | 0.039   | 0.410           |
| ENSMUST00000105628                         | ENSMUST00000105628          | ens RIKEN cDNA 2610002J02 gene Gene [Source:MGI Symbol;Acc:MGI:1914763] [ENSMUST00000105628]                                                                 | 0.32             | 0.014   | 0.257           |
| Elf3m                                      | NM_145380                   | ref Mus musculus eukaryotic translation initiation factor 3, subunit M (Elf3m), mRNA [NM_145380]                                                             | 0.32             | 0.008   | 0.193           |
| Tor3a                                      | NM_023141                   | ref Mus musculus torsin family 3, member A (Tor3a), mRNA [NM_023141]                                                                                         | 0.32             | 0.020   | 0.295           |
| Vmn1r176                                   | NM_001166721                | ref Mus musculus vomeronasal 1 receptor 176 (Vmn1r176), mRNA [NM_001166721]                                                                                  | 0.32             | 0.010   | 0.208           |
| Ifi202b                                    | NM_008327                   | ref Mus musculus interferon activated gene 202B (Ifi202b), transcript variant 1, mRNA [NM_008327]                                                            | 0.32             | 0.040   | 0.416           |
| Rep15                                      | NM_025620                   | ref Mus musculus RAB15 effector protein (Rep15), mRNA [NM_025620]                                                                                            | 0.32             | 0.005   | 0.151           |
| Nme3                                       | NM_019730                   | ref Mus musculus non-metastatic cells 3, protein expressed in (Nme3), mRNA [NM_019730]                                                                       | 0.32             | 0.025   | 0.331           |
| chr12:5303823-5379098_R                    | chr12:5303823-5379098_R     | lincRNA:chr12:5303823-5379098 reverse strand                                                                                                                 | 0.32             | 0.042   | 0.426           |
| Aspn                                       | NM_025711                   | ref Mus musculus asporin (Aspn), transcript variant 1, mRNA [NM_025711]                                                                                      | 0.32             | 0.021   | 0.304           |
| ENSMUST00000109432                         | ENSMUST00000109432          | ens fibulin 1 Gene [Source:MGI Symbol;Acc:MGI:95487] [ENSMUST00000109432]                                                                                    | 0.32             | 0.017   | 0.278           |
| Madcam1                                    | NM_013591                   | ref Mus musculus mucosal vascular addressin cell adhesion molecule 1 (Madcam1), mRNA [NM_013591]                                                             | 0.32             | 0.008   | 0.185           |
| Gm7972                                     | XM_001475415                | ref PREDICTED: Mus musculus predicted gene, EG666190 (EG666190), mRNA [XM_001475415]                                                                         | 0.32             | 0.037   | 0.401           |
| Gm4361                                     | XM_001479735                | ref PREDICTED: Mus musculus hypothetical protein LOC100043325 (LOC100043325), mRNA [XM_001479735]                                                            | 0.31             | 0.023   | 0.317           |
| LOC100045418                               | XM_001474239                | ref PREDICTED: Mus musculus hypothetical protein LOC100045418 (LOC100045418), mRNA [XM_001474239]                                                            | 0.31             | 0.007   | 0.179           |
| chr11:102983499-102994170_F                | chr11:102983499-102994170_F | lincRNA:chr11:102983499-102994170 forward strand                                                                                                             | 0.31             | 0.014   | 0.251           |
| chr9:20784567-20799942_R                   | chr9:20784567-20799942_R    | lincRNA:chr9:20784567-20799942 reverse strand                                                                                                                | 0.31             | 0.018   | 0.284           |
| chr8:19678750-20038750_R                   | chr8:19678750-20038750_R    | lincRNA:chr8:19678750-20038750 reverse strand                                                                                                                | 0.31             | 0.025   | 0.330           |
| Gm3860                                     | XM_001478272                | ref PREDICTED: Mus musculus hypothetical protein LOC100042470 (LOC100042470), mRNA [XM_001478272]                                                            | 0.31             | 0.027   | 0.347           |
| C87436                                     | NM_146170                   | ref Mus musculus expressed sequence C87436 (C87436), transcript variant 1, mRNA [NM_146170]                                                                  | 0.31             | 0.009   | 0.200           |
| 2310016C08Rik                              | NM_023516                   | ref Mus musculus RIKEN cDNA 2310016C08 gene (2310016C08Rik), transcript variant 2, mRNA [NM_023516]                                                          | 0.31             | 0.002   | 0.099           |
| 1110018G07Rik                              | NM_178065                   | ref Mus musculus RIKEN cDNA 1110018G07 gene (1110018G07Rik), mRNA [NM_178065]                                                                                | 0.31             | 0.001   | 0.068           |
| Map2k7                                     | NM_001042557                | ref Mus musculus mitogen-activated protein kinase kinase 7 (Map2k7), transcript variant 1, mRNA [NM_001042557]                                               | 0.31             | 0.028   | 0.353           |
| Olfm1                                      | NM_019498                   | ref Mus musculus olfactomedin 1 (Olfm1), transcript variant 1, mRNA [NM_019498]                                                                              | 0.31             | 0.027   | 0.347           |
| 2310008H04Rik                              | NM_146068                   | ref Mus musculus RIKEN cDNA 2310008H04 gene (2310008H04Rik), mRNA [NM_146068]                                                                                | 0.31             | 0.013   | 0.247           |
| 1110046J04Rik                              | AK004186                    | gb Mus musculus 18-day embryo whole body cDNA, RIKEN full-length enriched library, clone:1110046J04 product:unclassifiable, full insert sequence. [AK004186] | 0.31             | 0.048   | 0.449           |
| Hn1                                        | NM_008258                   | ref Mus musculus hematological and neurological expressed sequence 1 (Hn1), mRNA [NM_008258]                                                                 | 0.31             | 0.035   | 0.389           |
| LOC100048185                               | XM_001479706                | ref PREDICTED: Mus musculus similar to Btf3 protein (LOC100048185), mRNA [XM_001479706]                                                                      | 0.31             | 0.029   | 0.353           |
| Lix1l                                      | NM_001163170                | ref Mus musculus Lix1-like (Lix1l), mRNA [NM_001163170]                                                                                                      | 0.31             | 0.001   | 0.077           |

| Online Supplemental Table IV: Con-STZ Only |                             |                                                                                                                                                       |                  |         |                 |
|--------------------------------------------|-----------------------------|-------------------------------------------------------------------------------------------------------------------------------------------------------|------------------|---------|-----------------|
| Gene Symbol                                | RefSeq                      | Description                                                                                                                                           | logFC<br>Con-STZ | P-value | Adj.<br>P-value |
| Pten                                       | NM_008960                   | ref Mus musculus phosphatase and tensin homolog (Pten), mRNA [NM_008960]                                                                              | 0.31             | 0.017   | 0.275           |
| 3300005D01Rik                              | XM_001476467                | ref PREDICTED: Mus musculus RIKEN cDNA 3300005D01 gene (3300005D01Rik), mRNA [XM_001476467]                                                           | 0.31             | 0.012   | 0.229           |
| Fgfr1                                      | NM_010206                   | ref Mus musculus fibroblast growth factor receptor 1 (Fgfr1), transcript variant 1, mRNA [NM_010206]                                                  | 0.31             | 0.014   | 0.251           |
| chr6:53808521-53817132_F                   | chr6:53808521-53817132_F    | lincRNA:chr6:53808521-53817132 forward strand                                                                                                         | 0.31             | 0.039   | 0.408           |
| Rasa3                                      | NM_009025                   | ref Mus musculus RAS p21 protein activator 3 (Rasa3), mRNA [NM_009025]                                                                                | 0.31             | 0.004   | 0.135           |
| 9030619P08Rik                              | NM_001039720                | ref Mus musculus RIKEN cDNA 9030619P08 gene (9030619P08Rik), mRNA [NM_001039720]                                                                      | 0.31             | 0.005   | 0.147           |
| chr13:94200051-94200598_R                  | chr13:94200051-94200598_R   | lincRNA:chr13:94200051-94200598 reverse strand                                                                                                        | 0.31             | 0.035   | 0.388           |
| ENSMUST00000114193                         | ENSMUST00000114193          | ens ATP synthase, H+ transporting, mitochondrial F0 complex, subunit F Gene [Source:MGI (curated);Acc:MGI:107777] [ENSMUST00000114193]                | 0.31             | 0.027   | 0.347           |
| chr2:168136823-168137075_R                 | chr2:168136823-168137075_R  | lincRNA:chr2:168136823-168137075 reverse strand                                                                                                       | 0.31             | 0.027   | 0.348           |
| Ifi202b                                    | NM_011940                   | ref Mus musculus interferon activated gene 202B (Ifi202b), transcript variant 2, mRNA [NM_011940]                                                     | 0.31             | 0.048   | 0.450           |
| Camta1                                     | NM_001081557                | ref Mus musculus calmodulin binding transcription activator 1 (Camta1), transcript variant 1, mRNA [NM_001081557]                                     | 0.31             | 0.010   | 0.208           |
| 1110038B12Rik                              | NR_027943                   | ref Mus musculus RIKEN cDNA 1110038B12 gene (1110038B12Rik), transcript variant 1, non-coding RNA [NR_027943]                                         | 0.31             | 0.038   | 0.407           |
| Etfdh                                      | NM_025794                   | ref Mus musculus electron transferring flavoprotein, dehydrogenase (Etfdh), mRNA [NM_025794]                                                          | 0.31             | 0.035   | 0.388           |
| Slit3                                      | NM_011412                   | ref Mus musculus slit homolog 3 (Drosophila) (Slit3), mRNA [NM_011412]                                                                                | 0.31             | 0.011   | 0.223           |
| Ap3s1                                      | NM_009681                   | ref Mus musculus adaptor-related protein complex 3, sigma 1 subunit (Ap3s1), mRNA [NM_009681]                                                         | 0.31             | 0.018   | 0.282           |
| 4930474N09Rik                              | AK015577                    | gb Mus musculus adult male testis cDNA, RIKEN full-length enriched library, clone:4930474N09 product:unclassifiable, full insert sequence. [AK015577] | 0.31             | 0.034   | 0.383           |
| 2410018L13Rik                              | NR_015504                   | ref Mus musculus RIKEN cDNA 2410018L13 gene (2410018L13Rik), non-coding RNA [NR_015504]                                                               | 0.31             | 0.034   | 0.385           |
| Kazald1                                    | NM_178929                   | ref Mus musculus Kazal-type serine peptidase inhibitor domain 1 (Kazald1), mRNA [NM_178929]                                                           | 0.31             | 0.021   | 0.307           |
| Pon3                                       | NM_173006                   | ref Mus musculus paraoxonase 3 (Pon3), mRNA [NM_173006]                                                                                               | 0.31             | 0.003   | 0.118           |
| Amotl2                                     | NM_019764                   | ref Mus musculus angiomin-like 2 (Amotl2), mRNA [NM_019764]                                                                                           | 0.31             | 0.032   | 0.372           |
| Lor                                        | NM_008508                   | ref Mus musculus lorocrin (Lor), mRNA [NM_008508]                                                                                                     | 0.31             | 0.025   | 0.330           |
| Carhsp1                                    | NM_025821                   | ref Mus musculus calcium regulated heat stable protein 1 (Carhsp1), mRNA [NM_025821]                                                                  | 0.31             | 0.036   | 0.391           |
| D3Erd751e                                  | NM_028667                   | ref Mus musculus DNA segment, Chr 3, ERATO Doi 751, expressed (D3Erd751e), transcript variant 1, mRNA [NM_028667]                                     | 0.31             | 0.031   | 0.369           |
| chr10:114762889-114763210_F                | chr10:114762889-114763210_F | lincRNA:chr10:114762889-114763210 forward strand                                                                                                      | 0.31             | 0.044   | 0.432           |
| Idi2                                       | NM_177197                   | ref Mus musculus isopentenyl-diphosphate delta isomerase 2 (Idi2), mRNA [NM_177197]                                                                   | 0.31             | 0.031   | 0.367           |
| 2900026A02Rik                              | NM_172884                   | ref Mus musculus RIKEN cDNA 2900026A02 gene (2900026A02Rik), mRNA [NM_172884]                                                                         | 0.31             | 0.032   | 0.374           |
| Tmem136                                    | NM_001034863                | ref Mus musculus transmembrane protein 136 (Tmem136), mRNA [NM_001034863]                                                                             | 0.31             | 0.004   | 0.134           |
| Cdk8                                       | NM_153599                   | ref Mus musculus cyclin-dependent kinase 8 (Cdk8), mRNA [NM_153599]                                                                                   | 0.31             | 0.019   | 0.289           |
| Gm3448                                     | NM_001123367                | ref Mus musculus predicted gene 3448 (Gm3448), mRNA [NM_001123367]                                                                                    | 0.31             | 0.030   | 0.361           |

Online Supplemental Table IV: Con-STZ Only

| Gene Symbol               | RefSeq                    | Description                                                                                                                                                    | logFC<br>Con-STZ | P-value | Adj.<br>P-value |
|---------------------------|---------------------------|----------------------------------------------------------------------------------------------------------------------------------------------------------------|------------------|---------|-----------------|
| Fjx1                      | NM_010218                 | ref Mus musculus four jointed box 1 (Drosophila) (Fjx1), mRNA [NM_010218]                                                                                      | 0.31             | 0.041   | 0.420           |
| Sap30                     | NM_021788                 | ref Mus musculus sin3 associated polypeptide (Sap30), mRNA [NM_021788]                                                                                         | 0.30             | 0.018   | 0.286           |
| Cdkl1                     | NM_183294                 | ref Mus musculus cyclin-dependent kinase-like 1 (CDC2-related kinase) (Cdkl1), mRNA [NM_183294]                                                                | 0.30             | 0.039   | 0.410           |
| Mfsd7b                    | NM_001081259              | ref Mus musculus major facilitator superfamily domain containing 7B (Mfsd7b), mRNA [NM_001081259]                                                              | 0.30             | 0.033   | 0.377           |
| chr15:79709500-79714700_F | chr15:79709500-79714700_F | lincRNA:chr15:79709500-79714700 forward strand                                                                                                                 | 0.30             | 0.023   | 0.317           |
| C030027H14Rik             | AK021106                  | gb Mus musculus adult male corpus striatum cDNA, RIKEN full-length enriched library, clone:C030027H14 product:unclassifiable, full insert sequence. [AK021106] | 0.30             | 0.029   | 0.353           |
| Dync2h1                   | NM_029851                 | ref Mus musculus dynein cytoplasmic 2 heavy chain 1 (Dync2h1), mRNA [NM_029851]                                                                                | 0.30             | 0.016   | 0.271           |
| Gm9484                    | XM_001474948              | ref PREDICTED: Mus musculus hypothetical LOC670358 (LOC670358), mRNA [XM_001474948]                                                                            | 0.30             | 0.047   | 0.446           |
| Rps28                     | NM_016844                 | ref Mus musculus ribosomal protein S28 (Rps28), mRNA [NM_016844]                                                                                               | 0.30             | 0.003   | 0.114           |
| Rrs1                      | NM_021511                 | ref Mus musculus RRS1 ribosome biogenesis regulator homolog (S. cerevisiae) (Rrs1), mRNA [NM_021511]                                                           | 0.30             | 0.010   | 0.216           |
| Krtap24-1                 | NM_001163141              | ref Mus musculus keratin associated protein 24-1 (Krtap24-1), mRNA [NM_001163141]                                                                              | 0.30             | 0.037   | 0.398           |
| St6galnac4                | NM_011373                 | ref Mus musculus ST6 (alpha-N-acetyl-neuraminyl-2,3-beta-galactosyl-1,3)-N-acetylgalactosaminide alpha-2,6-sialyltransferase 4 (St6galnac4), mRNA [NM_011373]  | 0.30             | 0.015   | 0.264           |
| Obscn                     | NM_199152                 | ref Mus musculus obscurin, cytoskeletal calmodulin and titin-interacting RhoGEF (Obscn), transcript variant 2, mRNA [NM_199152]                                | 0.30             | 0.015   | 0.260           |
| Ltbp3                     | NM_008520                 | ref Mus musculus latent transforming growth factor beta binding protein 3 (Ltbp3), mRNA [NM_008520]                                                            | 0.30             | 0.015   | 0.263           |
| Hif1a                     | NM_010431                 | ref Mus musculus hypoxia inducible factor 1, alpha subunit (Hif1a), mRNA [NM_010431]                                                                           | 0.30             | 0.004   | 0.131           |
| Sat1                      | NM_009121                 | ref Mus musculus spermidine/spermine N1-acetyl transferase 1 (Sat1), mRNA [NM_009121]                                                                          | 0.30             | 0.016   | 0.269           |
| chr3:85806420-85889300_R  | chr3:85806420-85889300_R  | lincRNA:chr3:85806420-85889300 reverse strand                                                                                                                  | 0.30             | 0.047   | 0.446           |
| Id1                       | NM_010495                 | ref Mus musculus inhibitor of DNA binding 1 (Id1), mRNA [NM_010495]                                                                                            | 0.30             | 0.049   | 0.456           |
| Il17rc                    | NM_134159                 | ref Mus musculus interleukin 17 receptor C (Il17rc), mRNA [NM_134159]                                                                                          | 0.30             | 0.042   | 0.422           |
| Fat1                      | NM_001081286              | ref Mus musculus FAT tumor suppressor homolog 1 (Drosophila) (Fat1), mRNA [NM_001081286]                                                                       | 0.30             | 0.026   | 0.337           |
| Ptprj                     | NM_008982                 | ref Mus musculus protein tyrosine phosphatase, receptor type, J (Ptprj), transcript variant 1, mRNA [NM_008982]                                                | 0.30             | 0.028   | 0.353           |
| chr14:77042348-77042645_R | chr14:77042348-77042645_R | lincRNA:chr14:77042348-77042645 reverse strand                                                                                                                 | 0.30             | 0.009   | 0.195           |
| Mgll                      | NM_001166250              | ref Mus musculus monoglyceride lipase (Mgll), transcript variant 4, mRNA [NM_001166250]                                                                        | 0.30             | 0.015   | 0.261           |
| Gm6961                    | XM_901330                 | ref PREDICTED: Mus musculus predicted gene, EG629300 (EG629300), mRNA [XM_901330]                                                                              | 0.30             | 0.041   | 0.422           |
| Efs                       | NM_010112                 | ref Mus musculus embryonal Fyn-associated substrate (Efs), mRNA [NM_010112]                                                                                    | 0.30             | 0.007   | 0.172           |
| Tead2                     | NM_011565                 | ref Mus musculus TEA domain family member 2 (Tead2), mRNA [NM_011565]                                                                                          | 0.30             | 0.006   | 0.170           |
| Mat2a                     | NM_145569                 | ref Mus musculus methionine adenosyltransferase II, alpha (Mat2a), mRNA [NM_145569]                                                                            | 0.30             | 0.032   | 0.375           |
| Taf1d                     | NM_027261                 | ref Mus musculus TATA box binding protein (Tbp)-associated factor, RNA polymerase I, D (Taf1d), transcript variant 3, mRNA [NM_027261]                         | 0.30             | 0.033   | 0.376           |
| Csad                      | NM_144942                 | ref Mus musculus cysteine sulfinic acid decarboxylase (Csad), mRNA [NM_144942]                                                                                 | 0.30             | 0.009   | 0.201           |

| Online Supplemental Table IV: Con-STZ Only |                            |                                                                                                                                         |                  |         |                 |
|--------------------------------------------|----------------------------|-----------------------------------------------------------------------------------------------------------------------------------------|------------------|---------|-----------------|
| Gene Symbol                                | RefSeq                     | Description                                                                                                                             | logFC<br>Con-STZ | P-value | Adj.<br>P-value |
| Copg                                       | NM_201244                  | ref Mus musculus coatmer protein complex, subunit gamma (Copg), transcript variant 2, mRNA [NM_201244]                                  | 0.30             | 0.035   | 0.389           |
| Car11                                      | NM_009800                  | ref Mus musculus carbonic anhydrase 11 (Car11), mRNA [NM_009800]                                                                        | 0.30             | 0.006   | 0.169           |
| ENSMUST00000097723                         | ENSMUST00000097723         | ens Putative uncharacterized protein [Source:UniProtKB/TrEMBL;Acc:Q3TTS9] [ENSMUST00000097723]                                          | 0.30             | 0.041   | 0.422           |
| chr10:83980790-83986015_R                  | chr10:83980790-83986015_R  | lincRNA:chr10:83980790-83986015 reverse strand                                                                                          | 0.30             | 0.036   | 0.391           |
| Syncrip                                    | NM_019796                  | ref Mus musculus synaptotagmin binding, cytoplasmic RNA interacting protein (Syncrip), transcript variant 2, mRNA [NM_019796]           | 0.30             | 0.004   | 0.132           |
| ENSMUST00000112407                         | ENSMUST00000112407         | ens sodium channel, voltage-gated, type III, alpha Gene [Source:MGI (curated);Acc:MGI:98249] [ENSMUST00000112407]                       | 0.30             | 0.038   | 0.403           |
| Snhg3                                      | NR_003270                  | ref Mus musculus small nucleolar RNA host gene (non-protein coding) 3 (Snhg3), non-coding RNA [NR_003270]                               | 0.30             | 0.013   | 0.245           |
| LOC100045359                               | XM_001474179               | ref PREDICTED: Mus musculus similar to Development and differentiation enhancing (LOC100045359), mRNA [XM_001474179]                    | 0.30             | 0.014   | 0.257           |
| Ctsz                                       | NM_022325                  | ref Mus musculus cathepsin Z (Ctsz), mRNA [NM_022325]                                                                                   | 0.30             | 0.022   | 0.314           |
| chr11:93994795-94017045_F                  | chr11:93994795-94017045_F  | lincRNA:chr11:93994795-94017045 forward strand                                                                                          | 0.30             | 0.037   | 0.398           |
| chr1:75075500-75102200_F                   | chr1:75075500-75102200_F   | lincRNA:chr1:75075500-75102200 forward strand                                                                                           | 0.30             | 0.027   | 0.344           |
| chr18:35974770-35975091_F                  | chr18:35974770-35975091_F  | lincRNA:chr18:35974770-35975091 forward strand                                                                                          | 0.30             | 0.043   | 0.428           |
| Pura                                       | NM_008989                  | ref Mus musculus purine rich element binding protein A (Pura), mRNA [NM_008989]                                                         | 0.30             | 0.006   | 0.165           |
| chr12:89479525-89503525_F                  | chr12:89479525-89503525_F  | lincRNA:chr12:89479525-89503525 forward strand                                                                                          | 0.30             | 0.046   | 0.443           |
| chr1:182438908-182449858_R                 | chr1:182438908-182449858_R | lincRNA:chr1:182438908-182449858 reverse strand                                                                                         | 0.29             | 0.041   | 0.418           |
| Azin1                                      | NM_018745                  | ref Mus musculus antizyme inhibitor 1 (Azin1), transcript variant 2, mRNA [NM_018745]                                                   | 0.29             | 0.011   | 0.228           |
| Iqgap1                                     | NM_016721                  | ref Mus musculus IQ motif containing GTPase activating protein 1 (Iqgap1), mRNA [NM_016721]                                             | 0.29             | 0.017   | 0.278           |
| Zcchc18                                    | NM_001035510               | ref Mus musculus zinc finger, CCHC domain containing 18 (Zcchc18), transcript variant 1, mRNA [NM_001035510]                            | 0.29             | 0.040   | 0.414           |
| Nedd9                                      | NM_017464                  | ref Mus musculus neural precursor cell expressed, developmentally down-regulated gene 9 (Nedd9), transcript variant 2, mRNA [NM_017464] | 0.29             | 0.023   | 0.317           |
| Ifi204                                     | NM_008329                  | ref Mus musculus interferon activated gene 204 (Ifi204), mRNA [NM_008329]                                                               | 0.29             | 0.005   | 0.155           |
| Pdlim5                                     | NM_019809                  | ref Mus musculus PDZ and LIM domain 5 (Pdlim5), transcript variant 2, mRNA [NM_019809]                                                  | 0.29             | 0.037   | 0.399           |
| Pdgfb                                      | NM_011057                  | ref Mus musculus platelet derived growth factor, B polypeptide (Pdgfb), mRNA [NM_011057]                                                | 0.29             | 0.008   | 0.185           |
| ENSMUST00000117274                         | ENSMUST00000117274         | ens leukocyte receptor cluster (LRC) member 8 Gene [Source:MGI (curated);Acc:MGI:2142195] [ENSMUST00000117274]                          | 0.29             | 0.016   | 0.272           |
| Olf1408                                    | NM_146764                  | ref Mus musculus olfactory receptor 1408 (Olf1408), mRNA [NM_146764]                                                                    | 0.29             | 0.037   | 0.397           |
| Nop14                                      | NM_029278                  | ref Mus musculus NOP14 nucleolar protein homolog (yeast) (Nop14), mRNA [NM_029278]                                                      | 0.29             | 0.023   | 0.320           |
| Cebpg                                      | NM_009884                  | ref Mus musculus CCAAT/enhancer binding protein (C/EBP), gamma (Cebpg), mRNA [NM_009884]                                                | 0.29             | 0.015   | 0.263           |
| chr15:32708654-32725622_F                  | chr15:32708654-32725622_F  | lincRNA:chr15:32708654-32725622 forward strand                                                                                          | 0.29             | 0.043   | 0.427           |
| Cfl2                                       | NM_007688                  | ref Mus musculus cofilin 2, muscle (Cfl2), mRNA [NM_007688]                                                                             | 0.29             | 0.006   | 0.167           |



| Online Supplemental Table IV: Con-STZ Only |                           |                                                                                                                   |                  |         |                 |
|--------------------------------------------|---------------------------|-------------------------------------------------------------------------------------------------------------------|------------------|---------|-----------------|
| Gene Symbol                                | RefSeq                    | Description                                                                                                       | logFC<br>Con-STZ | P-value | Adj.<br>P-value |
| chr3:30059174-30060808_R                   | chr3:30059174-30060808_R  | lincRNA:chr3:30059174-30060808 reverse strand                                                                     | 0.29             | 0.035   | 0.391           |
| ENSMUST00000108446                         | ENSMUST00000108446        | ref PREDICTED: Mus musculus hypothetical protein LOC100043625 (LOC100043625), mRNA [XM_001480641]                 | 0.29             | 0.034   | 0.385           |
| Fuca1                                      | NM_024243                 | ref Mus musculus fucosidase, alpha-L-1, tissue (Fuca1), mRNA [NM_024243]                                          | 0.29             | 0.004   | 0.128           |
| Dnajc3                                     | NM_008929                 | ref Mus musculus DnaJ (Hsp40) homolog, subfamily C, member 3 (Dnajc3), mRNA [NM_008929]                           | 0.29             | 0.029   | 0.353           |
| LOC269472                                  | BC027582                  | gb Mus musculus cDNA sequence BC027582, mRNA (cDNA clone MGC:41739 IMAGE:1379952), complete cds. [BC027582]       | 0.29             | 0.005   | 0.145           |
| Mx1                                        | NM_010846                 | ref Mus musculus myxovirus (influenza virus) resistance 1 (Mx1), mRNA [NM_010846]                                 | 0.29             | 0.041   | 0.418           |
| Samd14                                     | NM_146025                 | ref Mus musculus sterile alpha motif domain containing 14 (Samd14), transcript variant 1, mRNA [NM_146025]        | 0.29             | 0.004   | 0.135           |
| Diap2                                      | NM_172493                 | ref Mus musculus diaphanous homolog 2 (Drosophila) (Diap2), transcript variant 2, mRNA [NM_172493]                | 0.29             | 0.033   | 0.376           |
| Apbb3                                      | NM_146085                 | ref Mus musculus amyloid beta (A4) precursor protein-binding, family B, member 3 (Apbb3), mRNA [NM_146085]        | 0.29             | 0.012   | 0.236           |
| Gpr19                                      | NM_001167693              | ref Mus musculus G protein-coupled receptor 19 (Gpr19), transcript variant 1, mRNA [NM_001167693]                 | 0.29             | 0.044   | 0.430           |
| Ppp2ca                                     | NM_019411                 | ref Mus musculus protein phosphatase 2 (formerly 2A), catalytic subunit, alpha isoform (Ppp2ca), mRNA [NM_019411] | 0.29             | 0.026   | 0.337           |
| Krtap6-3                                   | XM_001474351              | ref PREDICTED: Mus musculus similar to keratin associated protein 20-2 (LOC100040249), mRNA [XM_001474351]        | 0.29             | 0.049   | 0.455           |
| Anxa4                                      | NM_013471                 | ref Mus musculus annexin A4 (Anxa4), mRNA [NM_013471]                                                             | 0.29             | 0.045   | 0.437           |
| Bag3                                       | NM_013863                 | ref Mus musculus BCL2-associated athanogene 3 (Bag3), mRNA [NM_013863]                                            | 0.29             | 0.016   | 0.267           |
| Mtus2                                      | NM_029920                 | ref Mus musculus microtubule associated tumor suppressor candidate 2 (Mtus2), mRNA [NM_029920]                    | 0.29             | 0.023   | 0.316           |
| Tgfr1                                      | NM_009370                 | ref Mus musculus transforming growth factor, beta receptor I (Tgfr1), mRNA [NM_009370]                            | 0.29             | 0.026   | 0.335           |
| Serpina3c                                  | NM_008458                 | ref Mus musculus serine (or cysteine) peptidase inhibitor, clade A, member 3C (Serpina3c), mRNA [NM_008458]       | 0.29             | 0.040   | 0.415           |
| Cttnbp2nl                                  | NM_030249                 | ref Mus musculus CTTNBP2 N-terminal like (Cttnbp2nl), transcript variant 1, mRNA [NM_030249]                      | 0.29             | 0.016   | 0.274           |
| Cox6b2                                     | NM_183405                 | ref Mus musculus cytochrome c oxidase subunit VIb polypeptide 2 (Cox6b2), transcript variant 1, mRNA [NM_183405]  | 0.29             | 0.038   | 0.402           |
| Klrg1                                      | NM_016970                 | ref Mus musculus killer cell lectin-like receptor subfamily G, member 1 (Klrg1), mRNA [NM_016970]                 | 0.29             | 0.049   | 0.455           |
| chr10:39383665-39442690_R                  | chr10:39383665-39442690_R | lincRNA:chr10:39383665-39442690 reverse strand                                                                    | 0.29             | 0.033   | 0.376           |
| chrX:34360500-34388500_R                   | chrX:34360500-34388500_R  | lincRNA:chrX:34360500-34388500 reverse strand                                                                     | 0.29             | 0.043   | 0.429           |
| chr4:21683562-21694344_R                   | chr4:21683562-21694344_R  | lincRNA:chr4:21683562-21694344 reverse strand                                                                     | 0.29             | 0.049   | 0.455           |
| LOC676108                                  | XR_031615                 | ref PREDICTED: Mus musculus similar to PNG protein (LOC676108), misc RNA [XR_031615]                              | 0.29             | 0.017   | 0.277           |
| Cul7                                       | NM_025611                 | ref Mus musculus cullin 7 (Cul7), mRNA [NM_025611]                                                                | 0.29             | 0.011   | 0.220           |
| Adam9                                      | NM_007404                 | ref Mus musculus a disintegrin and metalloproteinase domain 9 (meltrin gamma) (Adam9), mRNA [NM_007404]           | 0.29             | 0.013   | 0.243           |
| Tars                                       | NM_033074                 | ref Mus musculus threonyl-tRNA synthetase (Tars), mRNA [NM_033074]                                                | 0.29             | 0.005   | 0.155           |
| Nqo1                                       | NM_008706                 | ref Mus musculus NAD(P)H dehydrogenase, quinone 1 (Nqo1), mRNA [NM_008706]                                        | 0.29             | 0.010   | 0.208           |
| Olf172                                     | NM_147001                 | ref Mus musculus olfactory receptor 172 (Olf172), mRNA [NM_147001]                                                | 0.29             | 0.033   | 0.379           |

| Online Supplemental Table IV: Con-STZ Only |                             |                                                                                                                       |                  |         |                 |
|--------------------------------------------|-----------------------------|-----------------------------------------------------------------------------------------------------------------------|------------------|---------|-----------------|
| Gene Symbol                                | RefSeq                      | Description                                                                                                           | logFC<br>Con-STZ | P-value | Adj.<br>P-value |
| chr16:90038086-90127636_R                  | chr16:90038086-90127636_R   | lincRNA:chr16:90038086-90127636 reverse strand                                                                        | 0.29             | 0.020   | 0.300           |
| chr8:106619342-106624851_R                 | chr8:106619342-106624851_R  | lincRNA:chr8:106619342-106624851 reverse strand                                                                       | 0.29             | 0.046   | 0.444           |
| Man2a1                                     | NM_008549                   | ref Mus musculus mannosidase 2, alpha 1 (Man2a1), mRNA [NM_008549]                                                    | 0.29             | 0.020   | 0.295           |
| chr13:108577843-108679708_R                | chr13:108577843-108679708_R | lincRNA:chr13:108577843-108679708 reverse strand                                                                      | 0.29             | 0.046   | 0.444           |
| Kif5b                                      | NM_008448                   | ref Mus musculus kinesin family member 5B (Kif5b), mRNA [NM_008448]                                                   | 0.28             | 0.013   | 0.239           |
| chr5:14960146-14978541_F                   | chr5:14960146-14978541_F    | lincRNA:chr5:14960146-14978541 forward strand                                                                         | 0.28             | 0.020   | 0.297           |
| Lmbr1l                                     | NM_029098                   | ref Mus musculus limb region 1 like (Lmbr1l), mRNA [NM_029098]                                                        | 0.28             | 0.029   | 0.354           |
| Arv1                                       | NM_026855                   | ref Mus musculus ARV1 homolog (yeast) (Arv1), mRNA [NM_026855]                                                        | 0.28             | 0.026   | 0.335           |
| Ctps                                       | NM_016748                   | ref Mus musculus cytidine 5'-triphosphate synthase (Ctps), mRNA [NM_016748]                                           | 0.28             | 0.023   | 0.321           |
| Cercam                                     | NM_207298                   | ref Mus musculus cerebral endothelial cell adhesion molecule (Cercam), mRNA [NM_207298]                               | 0.28             | 0.046   | 0.443           |
| Gm15032                                    | XM_001472223                | ref PREDICTED: Mus musculus similar to HL23 ribosomal protein (LOC100039086), mRNA [XM_001472223]                     | 0.28             | 0.048   | 0.449           |
| Epc2                                       | NM_172663                   | ref Mus musculus enhancer of polycomb homolog 2 (Drosophila) (Epc2), mRNA [NM_172663]                                 | 0.28             | 0.018   | 0.282           |
| Rnasel                                     | NM_011882                   | ref Mus musculus ribonuclease L (2', 5'-oligoadenylate synthetase-dependent) (Rnasel), mRNA [NM_011882]               | 0.28             | 0.036   | 0.392           |
| Cmklr1                                     | NM_008153                   | ref Mus musculus chemokine-like receptor 1 (Cmklr1), mRNA [NM_008153]                                                 | 0.28             | 0.039   | 0.412           |
| F2r                                        | NM_010169                   | ref Mus musculus coagulation factor II (thrombin) receptor (F2r), mRNA [NM_010169]                                    | 0.28             | 0.006   | 0.162           |
| chr5:74487385-74497428_F                   | chr5:74487385-74497428_F    | lincRNA:chr5:74487385-74497428 forward strand                                                                         | 0.28             | 0.023   | 0.321           |
| Aoc3                                       | NM_009675                   | ref Mus musculus amine oxidase, copper containing 3 (Aoc3), mRNA [NM_009675]                                          | 0.28             | 0.043   | 0.427           |
| Ccdc82                                     | NM_025534                   | ref Mus musculus coiled-coil domain containing 82 (Ccdc82), mRNA [NM_025534]                                          | 0.28             | 0.007   | 0.178           |
| chr15:12119755-12127230_F                  | chr15:12119755-12127230_F   | lincRNA:chr15:12119755-12127230 forward strand                                                                        | 0.28             | 0.048   | 0.449           |
| Rp2h                                       | NM_133669                   | ref Mus musculus retinitis pigmentosa 2 homolog (human) (Rp2h), mRNA [NM_133669]                                      | 0.28             | 0.046   | 0.443           |
| Slc8a2                                     | NM_148946                   | ref Mus musculus solute carrier family 8 (sodium/calcium exchanger), member 2 (Slc8a2), mRNA [NM_148946]              | 0.28             | 0.035   | 0.388           |
| Lpar6                                      | NM_175116                   | ref Mus musculus lysophosphatidic acid receptor 6 (Lpar6), mRNA [NM_175116]                                           | 0.28             | 0.010   | 0.214           |
| Cspg4                                      | NM_139001                   | ref Mus musculus chondroitin sulfate proteoglycan 4 (Cspg4), mRNA [NM_139001]                                         | 0.28             | 0.009   | 0.196           |
| Acbd4                                      | NM_025988                   | ref Mus musculus acyl-Coenzyme A binding domain containing 4 (Acbd4), transcript variant 1, mRNA [NM_025988]          | 0.28             | 0.025   | 0.330           |
| Nfatc3                                     | NM_010901                   | ref Mus musculus nuclear factor of activated T-cells, cytoplasmic, calcineurin-dependent 3 (Nfatc3), mRNA [NM_010901] | 0.28             | 0.025   | 0.332           |
| LOC100045981                               | XM_001475298                | ref PREDICTED: Mus musculus similar to synaptotagmin XI (LOC100045981), mRNA [XM_001475298]                           | 0.28             | 0.018   | 0.284           |
| Zfp704                                     | NM_133218                   | ref Mus musculus zinc finger protein 704 (Zfp704), mRNA [NM_133218]                                                   | 0.28             | 0.022   | 0.312           |
| Prkg1                                      | NM_011160                   | ref Mus musculus protein kinase, cGMP-dependent, type I (Prkg1), transcript variant 2, mRNA [NM_011160]               | 0.28             | 0.037   | 0.398           |
| 9430076C15Rik                              | NR_015553                   | ref Mus musculus RIKEN cDNA 9430076C15 gene (9430076C15Rik), non-coding RNA [NR_015553]                               | 0.28             | 0.050   | 0.457           |
| Gas2l1                                     | NM_144560                   | ref Mus musculus growth arrest-specific 2 like 1 (Gas2l1), transcript variant beta, mRNA [NM_144560]                  | 0.28             | 0.017   | 0.277           |

| Online Supplemental Table IV: Con-STZ Only |                            |                                                                                                                                 |                  |         |                 |
|--------------------------------------------|----------------------------|---------------------------------------------------------------------------------------------------------------------------------|------------------|---------|-----------------|
| Gene Symbol                                | RefSeq                     | Description                                                                                                                     | logFC<br>Con-STZ | P-value | Adj.<br>P-value |
| Mapk1ip1                                   | NM_001045483               | ref Mus musculus mitogen-activated protein kinase 1 interacting protein 1 (Mapk1ip1), transcript variant 1, mRNA [NM_001045483] | 0.28             | 0.047   | 0.449           |
| chr2:175543425-175603300_F                 | chr2:175543425-175603300_F | lincRNA:chr2:175543425-175603300 forward strand                                                                                 | 0.28             | 0.048   | 0.452           |
| Ppp1r2                                     | NM_025800                  | ref Mus musculus protein phosphatase 1, regulatory (inhibitor) subunit 2 (Ppp1r2), mRNA [NM_025800]                             | 0.28             | 0.016   | 0.269           |
| Rras2                                      | NM_025846                  | ref Mus musculus related RAS viral (r-ras) oncogene homolog 2 (Rras2), mRNA [NM_025846]                                         | 0.28             | 0.007   | 0.177           |
| Zfp7                                       | NM_145916                  | ref Mus musculus zinc finger protein 7 (Zfp7), mRNA [NM_145916]                                                                 | 0.28             | 0.046   | 0.444           |
| Cdkn1b                                     | NM_009875                  | ref Mus musculus cyclin-dependent kinase inhibitor 1B (Cdkn1b), mRNA [NM_009875]                                                | 0.28             | 0.049   | 0.456           |
| Layn                                       | NM_001033534               | ref Mus musculus layilin (Layn), mRNA [NM_001033534]                                                                            | 0.28             | 0.049   | 0.452           |
| 2900073G15Rik                              | NM_026064                  | ref Mus musculus RIKEN cDNA 2900073G15 gene (2900073G15Rik), mRNA [NM_026064]                                                   | 0.28             | 0.009   | 0.199           |
| Il4                                        | NM_021283                  | ref Mus musculus interleukin 4 (Il4), transcript variant 1, mRNA [NM_021283]                                                    | 0.28             | 0.011   | 0.216           |
| Acox1                                      | NM_015729                  | ref Mus musculus acyl-Coenzyme A oxidase 1, palmitoyl (Acox1), mRNA [NM_015729]                                                 | 0.27             | 0.013   | 0.246           |
| Spns3                                      | NM_029932                  | ref Mus musculus spinster homolog 3 (Drosophila) (Spns3), mRNA [NM_029932]                                                      | 0.27             | 0.048   | 0.449           |
| Snx10                                      | NM_028035                  | ref Mus musculus sorting nexin 10 (Snx10), transcript variant 1, mRNA [NM_028035]                                               | 0.27             | 0.025   | 0.334           |
| Artn                                       | NM_009711                  | ref Mus musculus artemin (Artn), mRNA [NM_009711]                                                                               | 0.27             | 0.045   | 0.437           |
| chr9:75330657-75332641_F                   | chr9:75330657-75332641_F   | lincRNA:chr9:75330657-75332641 forward strand                                                                                   | 0.27             | 0.018   | 0.283           |
| Stx2                                       | NM_007941                  | ref Mus musculus syntaxin 2 (Stx2), mRNA [NM_007941]                                                                            | 0.27             | 0.047   | 0.446           |
| Nsd1                                       | NM_008739                  | ref Mus musculus nuclear receptor-binding SET-domain protein 1 (Nsd1), mRNA [NM_008739]                                         | 0.27             | 0.045   | 0.436           |
| Plod3                                      | NM_011962                  | ref Mus musculus procollagen-lysine, 2-oxoglutarate 5-dioxygenase 3 (Plod3), mRNA [NM_011962]                                   | 0.27             | 0.016   | 0.272           |
| Plekho1                                    | NM_023320                  | ref Mus musculus pleckstrin homology domain containing, family O member 1 (Plekho1), mRNA [NM_023320]                           | 0.27             | 0.015   | 0.266           |
| Akr1b8                                     | NM_008012                  | ref Mus musculus aldo-keto reductase family 1, member B8 (Akr1b8), mRNA [NM_008012]                                             | 0.27             | 0.037   | 0.400           |
| Zfp346                                     | NM_012017                  | ref Mus musculus zinc finger protein 346 (Zfp346), mRNA [NM_012017]                                                             | 0.27             | 0.047   | 0.447           |
| ENSMUST00000095823                         | ENSMUST00000095823         | ref PREDICTED: Mus musculus RIKEN cDNA 2410004P03 gene, transcript variant 3 (2410004P03Rik), mRNA [XM_920599]                  | 0.27             | 0.047   | 0.446           |
| Arhgef12                                   | NM_027144                  | ref Mus musculus Rho guanine nucleotide exchange factor (GEF) 12 (Arhgef12), mRNA [NM_027144]                                   | 0.27             | 0.008   | 0.184           |
| ENSMUST00000103595                         | ENSMUST00000103595         | ens T-cell receptor alpha, variable 8 Gene [Source:MGI Symbol;Acc:MGI:98572] [ENSMUST00000103595]                               | 0.27             | 0.033   | 0.380           |
| Serpnb6c                                   | NM_148942                  | ref Mus musculus serine (or cysteine) peptidase inhibitor, clade B, member 6c (Serpnb6c), mRNA [NM_148942]                      | 0.27             | 0.031   | 0.369           |
| Hcfc1r1                                    | NM_181821                  | ref Mus musculus host cell factor C1 regulator 1 (XPO1-dependent) (Hcfc1r1), mRNA [NM_181821]                                   | 0.27             | 0.028   | 0.353           |
| Comtd1                                     | NM_026965                  | ref Mus musculus catechol-O-methyltransferase domain containing 1 (Comtd1), mRNA [NM_026965]                                    | 0.27             | 0.028   | 0.353           |
| Fam38a                                     | NM_001037298               | ref Mus musculus family with sequence similarity 38, member A (Fam38a), mRNA [NM_001037298]                                     | 0.27             | 0.004   | 0.137           |
| Adamtsl5                                   | NM_001113548               | ref Mus musculus ADAMTS-like 5 (Adamtsl5), transcript variant 1, mRNA [NM_001113548]                                            | 0.27             | 0.022   | 0.310           |
| 1700125D06Rik                              | NM_001085491               | ref Mus musculus RIKEN cDNA 1700125D06 gene (1700125D06Rik), mRNA [NM_001085491]                                                | 0.27             | 0.038   | 0.402           |
| Esyt1                                      | NM_011843                  | ref Mus musculus extended synaptotagmin-like protein 1 (Esyt1), mRNA [NM_011843]                                                | 0.27             | 0.010   | 0.216           |
| P2rx4                                      | NM_011026                  | ref Mus musculus purinergic receptor P2X, ligand-gated ion channel 4 (P2rx4), mRNA [NM_011026]                                  | 0.27             | 0.023   | 0.322           |

| Online Supplemental Table IV: Con-STZ Only |                            |                                                                                                                                                          |                  |         |                 |
|--------------------------------------------|----------------------------|----------------------------------------------------------------------------------------------------------------------------------------------------------|------------------|---------|-----------------|
| Gene Symbol                                | RefSeq                     | Description                                                                                                                                              | logFC<br>Con-STZ | P-value | Adj.<br>P-value |
| Gm8983                                     | XR_033375                  | ref PREDICTED: Mus musculus similar to cyclin I (LOC668118), misc RNA [XR_033375]                                                                        | 0.27             | 0.027   | 0.347           |
| Tgoln2                                     | NM_009444                  | ref Mus musculus trans-golgi network protein 2 (Tgoln2), mRNA [NM_009444]                                                                                | 0.27             | 0.023   | 0.317           |
| Srrm1                                      | NM_016799                  | ref Mus musculus serine/arginine repetitive matrix 1 (Srrm1), transcript variant 1, mRNA [NM_016799]                                                     | 0.27             | 0.044   | 0.435           |
| Tcap                                       | NM_011540                  | ref Mus musculus titin-cap (Tcap), mRNA [NM_011540]                                                                                                      | 0.27             | 0.033   | 0.376           |
| Gon4l                                      | NM_027389                  | ref Mus musculus gon-4-like (C.elegans) (Gon4l), mRNA [NM_027389]                                                                                        | 0.27             | 0.033   | 0.377           |
| Chmp4b                                     | NM_029362                  | ref Mus musculus chromatin modifying protein 4B (Chmp4b), mRNA [NM_029362]                                                                               | 0.27             | 0.005   | 0.148           |
| Foxc1                                      | NM_008592                  | ref Mus musculus forkhead box C1 (Foxc1), mRNA [NM_008592]                                                                                               | 0.27             | 0.024   | 0.329           |
| Lrp1                                       | NM_008512                  | ref Mus musculus low density lipoprotein receptor-related protein 1 (Lrp1), mRNA [NM_008512]                                                             | 0.27             | 0.025   | 0.332           |
| Srrm1                                      | NM_016799                  | ref Mus musculus serine/arginine repetitive matrix 1 (Srrm1), transcript variant 1, mRNA [NM_016799]                                                     | 0.27             | 0.020   | 0.300           |
| LOC674503                                  | XM_975189                  | ref PREDICTED: Mus musculus hypothetical LOC674503 (LOC674503), mRNA [XM_975189]                                                                         | 0.27             | 0.048   | 0.452           |
| Tnfrsf1b                                   | NM_011610                  | ref Mus musculus tumor necrosis factor receptor superfamily, member 1b (Tnfrsf1b), mRNA [NM_011610]                                                      | 0.26             | 0.050   | 0.456           |
| Ppfia1                                     | NM_001033319               | ref Mus musculus protein tyrosine phosphatase, receptor type, f polypeptide (PTPRF), interacting protein (liprin), alpha 1 (Ppfia1), mRNA [NM_001033319] | 0.26             | 0.020   | 0.298           |
| Twf1                                       | NM_008971                  | ref Mus musculus twinfilin, actin-binding protein, homolog 1 (Drosophila) (Twf1), mRNA [NM_008971]                                                       | 0.26             | 0.015   | 0.263           |
| Casc4                                      | NM_177054                  | ref Mus musculus cancer susceptibility candidate 4 (Casc4), transcript variant 1, mRNA [NM_177054]                                                       | 0.26             | 0.013   | 0.245           |
| Gm4815                                     | XR_033494                  | ref PREDICTED: Mus musculus similar to calponin 3, acidic (LOC218501), misc RNA [XR_033494]                                                              | 0.26             | 0.041   | 0.418           |
| ENSMUST00000091506                         | ENSMUST00000091506         | ref PREDICTED: Mus musculus similar to ribosomal protein S28 (LOC100047282), mRNA [XM_001477795]                                                         | 0.26             | 0.007   | 0.175           |
| chr11:58136882-58143829_R                  | chr11:58136882-58143829_R  | lincRNA:chr11:58136882-58143829 reverse strand                                                                                                           | 0.26             | 0.043   | 0.430           |
| Lrrc39                                     | NM_027321                  | ref Mus musculus leucine rich repeat containing 39 (Lrrc39), transcript variant 1, mRNA [NM_027321]                                                      | 0.26             | 0.046   | 0.444           |
| Sptlc2                                     | NM_011479                  | ref Mus musculus serine palmitoyltransferase, long chain base subunit 2 (Sptlc2), mRNA [NM_011479]                                                       | 0.26             | 0.031   | 0.367           |
| chr6:121035524-121061074_R                 | chr6:121035524-121061074_R | lincRNA:chr6:121035524-121061074 reverse strand                                                                                                          | 0.26             | 0.041   | 0.422           |
| 4931440P22Rik                              | NR_027955                  | ref Mus musculus RIKEN cDNA 4931440P22 gene (4931440P22Rik), non-coding RNA [NR_027955]                                                                  | 0.26             | 0.041   | 0.418           |
| Socs2                                      | NM_007706                  | ref Mus musculus suppressor of cytokine signaling 2 (Socs2), transcript variant 1, mRNA [NM_007706]                                                      | 0.26             | 0.020   | 0.298           |
| Get4                                       | NM_026269                  | ref Mus musculus golgi to ER traffic protein 4 homolog (S. cerevisiae) (Get4), transcript variant 1, mRNA [NM_026269]                                    | 0.26             | 0.011   | 0.224           |
| Plekha3                                    | NM_031256                  | ref Mus musculus pleckstrin homology domain-containing, family A (phosphoinositide binding specific) member 3 (Plekha3), mRNA [NM_031256]                | 0.26             | 0.011   | 0.223           |
| Dus2l                                      | NM_025518                  | ref Mus musculus dihydrouridine synthase 2-like (SMM1, S. cerevisiae) (Dus2l), mRNA [NM_025518]                                                          | 0.26             | 0.013   | 0.241           |
| Rnf169                                     | NM_175388                  | ref Mus musculus ring finger protein 169 (Rnf169), mRNA [NM_175388]                                                                                      | 0.26             | 0.013   | 0.246           |
| Pon2                                       | NM_183308                  | ref Mus musculus paraoxonase 2 (Pon2), mRNA [NM_183308]                                                                                                  | 0.26             | 0.032   | 0.372           |
| Fam151b                                    | NM_001163627               | ref Mus musculus family with sequence similarity 151, member B (Fam151b), mRNA [NM_001163627]                                                            | 0.26             | 0.030   | 0.362           |
| Trove2                                     | NM_013835                  | ref Mus musculus TROVE domain family, member 2 (Trove2), mRNA [NM_013835]                                                                                | 0.26             | 0.021   | 0.305           |
| Sema3f                                     | NM_011349                  | ref Mus musculus sema domain, immunoglobulin domain (Ig), short basic domain, secreted, (semaphorin) 3F (Sema3f), mRNA [NM_011349]                       | 0.26             | 0.047   | 0.446           |

Online Supplemental Table IV: Con-STZ Only

| Gene Symbol                | RefSeq                     | Description                                                                                                                                                                                                   | logFC<br>Con-<br>STZ | P-value | Adj.<br>P-value |
|----------------------------|----------------------------|---------------------------------------------------------------------------------------------------------------------------------------------------------------------------------------------------------------|----------------------|---------|-----------------|
| Rbpms                      | NM_001042675               | ref Mus musculus RNA binding protein gene with multiple splicing (Rbpms), transcript variant 3, mRNA [NM_001042675]                                                                                           | 0.26                 | 0.006   | 0.159           |
| Gm15031                    | XM_001474727               | ref PREDICTED: Mus musculus similar to 40S ribosomal protein S28 (LOC100045676), mRNA [XM_001474727]                                                                                                          | 0.26                 | 0.015   | 0.265           |
| Lamp2                      | NM_010685                  | ref Mus musculus lysosomal-associated membrane protein 2 (Lamp2), transcript variant 2, mRNA [NM_010685]                                                                                                      | 0.26                 | 0.014   | 0.258           |
| F730043M19Rik              | NR_015602                  | ref Mus musculus RIKEN cDNA F730043M19 gene (F730043M19Rik), non-coding RNA [NR_015602]                                                                                                                       | 0.26                 | 0.029   | 0.357           |
| Cdc42bpg                   | NM_001033342               | ref Mus musculus CDC42 binding protein kinase gamma (DMPK-like) (Cdc42bpg), mRNA [NM_001033342]                                                                                                               | 0.26                 | 0.027   | 0.342           |
| Etv6                       | NM_007961                  | ref Mus musculus ets variant gene 6 (TEL oncogene) (Etv6), mRNA [NM_007961]                                                                                                                                   | 0.26                 | 0.022   | 0.315           |
| Eif4b                      | NM_145625                  | ref Mus musculus eukaryotic translation initiation factor 4B (Eif4b), mRNA [NM_145625]                                                                                                                        | 0.26                 | 0.009   | 0.199           |
| Hyal2                      | NM_010489                  | ref Mus musculus hyaluronoglucosaminidase 2 (Hyal2), mRNA [NM_010489]                                                                                                                                         | 0.26                 | 0.033   | 0.378           |
| Gm9108                     | XR_034404                  | ref PREDICTED: Mus musculus similar to Hydroxyacyl-Coenzyme A dehydrogenase/3-ketoacyl-Coenzyme A thiolase/enoyl-Coenzyme A hydratase (trifunctional protein), beta subunit (LOC668327), misc RNA [XR_034404] | 0.26                 | 0.019   | 0.292           |
| Ssh3                       | NM_198113                  | ref Mus musculus slingshot homolog 3 (Drosophila) (Ssh3), mRNA [NM_198113]                                                                                                                                    | 0.26                 | 0.014   | 0.250           |
| Trmt6                      | NM_175113                  | ref Mus musculus tRNA methyltransferase 6 homolog (S. cerevisiae) (Trmt6), mRNA [NM_175113]                                                                                                                   | 0.26                 | 0.020   | 0.297           |
| Fbxo17                     | NM_015796                  | ref Mus musculus F-box protein 17 (Fbxo17), mRNA [NM_015796]                                                                                                                                                  | 0.26                 | 0.035   | 0.389           |
| BB014433                   | NM_001007591               | ref Mus musculus expressed sequence BB014433 (BB014433), mRNA [NM_001007591]                                                                                                                                  | 0.26                 | 0.046   | 0.444           |
| Rnf115                     | NM_026406                  | ref Mus musculus ring finger protein 115 (Rnf115), mRNA [NM_026406]                                                                                                                                           | 0.26                 | 0.018   | 0.284           |
| chr4:116791819-116798263_R | chr4:116791819-116798263_R | lincRNA:chr4:116791819-116798263 reverse strand                                                                                                                                                               | 0.26                 | 0.023   | 0.317           |
| Sept11                     | NM_001009818               | ref Mus musculus septin 11 (Sept11), mRNA [NM_001009818]                                                                                                                                                      | 0.26                 | 0.009   | 0.199           |
| Pkd1                       | NM_013630                  | ref Mus musculus polycystic kidney disease 1 homolog (Pkd1), mRNA [NM_013630]                                                                                                                                 | 0.26                 | 0.035   | 0.388           |
| Bri3bp                     | NM_029752                  | ref Mus musculus Bri3 binding protein (Bri3bp), mRNA [NM_029752]                                                                                                                                              | 0.26                 | 0.005   | 0.147           |
| Arsg                       | NM_028710                  | ref Mus musculus arylsulfatase G (Arsg), transcript variant 1, mRNA [NM_028710]                                                                                                                               | 0.26                 | 0.018   | 0.283           |
| ENSMUST00000092011         | ENSMUST00000092011         | ref PREDICTED: Mus musculus similar to ribosomal protein L12 (LOC546695), mRNA [XM_621465]                                                                                                                    | 0.26                 | 0.034   | 0.383           |
| Pemt                       | NM_008819                  | ref Mus musculus phosphatidylethanolamine N-methyltransferase (Pemt), nuclear gene encoding mitochondrial protein, mRNA [NM_008819]                                                                           | 0.25                 | 0.037   | 0.399           |
| Capn2                      | NM_009794                  | ref Mus musculus calpain 2 (Capn2), mRNA [NM_009794]                                                                                                                                                          | 0.25                 | 0.018   | 0.283           |
| Eea1                       | NM_001001932               | ref Mus musculus early endosome antigen 1 (Eea1), mRNA [NM_001001932]                                                                                                                                         | 0.25                 | 0.017   | 0.276           |
| Traf5                      | NM_011633                  | ref Mus musculus TNF receptor-associated factor 5 (Traf5), mRNA [NM_011633]                                                                                                                                   | 0.25                 | 0.013   | 0.246           |
| Stradb                     | NM_172656                  | ref Mus musculus STE20-related kinase adaptor beta (Stradb), mRNA [NM_172656]                                                                                                                                 | 0.25                 | 0.024   | 0.325           |
| Zfp68                      | NM_013844                  | ref Mus musculus zinc finger protein 68 (Zfp68), transcript variant 1, mRNA [NM_013844]                                                                                                                       | 0.25                 | 0.035   | 0.386           |
| 5430410E06Rik              | XM_001475205               | ref PREDICTED: Mus musculus RIKEN cDNA 5430410E06 gene (5430410E06Rik), mRNA [XM_001475205]                                                                                                                   | 0.25                 | 0.028   | 0.350           |
| Pde4dip                    | NM_001039376               | ref Mus musculus phosphodiesterase 4D interacting protein (myomegalin) (Pde4dip), transcript variant 1, mRNA [NM_001039376]                                                                                   | 0.25                 | 0.013   | 0.242           |

Online Supplemental Table IV: Con-STZ Only

| Gene Symbol                | RefSeq                     | Description                                                                                                                                 | logFC<br>Con-<br>STZ | P-value | Adj.<br>P-value |
|----------------------------|----------------------------|---------------------------------------------------------------------------------------------------------------------------------------------|----------------------|---------|-----------------|
| Fam72a                     | NM_175382                  | ref Mus musculus family with sequence similarity 72, member A (Fam72a), mRNA [NM_175382]                                                    | 0.25                 | 0.025   | 0.330           |
| Hsd17b4                    | NM_008292                  | ref Mus musculus hydroxysteroid (17-beta) dehydrogenase 4 (Hsd17b4), mRNA [NM_008292]                                                       | 0.25                 | 0.012   | 0.235           |
| Stk30                      | NM_011973                  | ref Mus musculus serine/threonine kinase 30 (Stk30), mRNA [NM_011973]                                                                       | 0.25                 | 0.037   | 0.400           |
| G6pdx                      | NM_008062                  | ref Mus musculus glucose-6-phosphate dehydrogenase X-linked (G6pdx), mRNA [NM_008062]                                                       | 0.25                 | 0.015   | 0.262           |
| ENSMUST00000085163         | ENSMUST00000085163         | ref PREDICTED: Mus musculus similar to 40S ribosomal protein S28 (LOC100042171), mRNA [XM_001477681]                                        | 0.25                 | 0.020   | 0.301           |
| Ppp1r2                     | NM_025800                  | ref Mus musculus protein phosphatase 1, regulatory (inhibitor) subunit 2 (Ppp1r2), mRNA [NM_025800]                                         | 0.25                 | 0.019   | 0.288           |
| Rhob                       | NM_007483                  | ref Mus musculus ras homolog gene family, member B (Rhob), mRNA [NM_007483]                                                                 | 0.25                 | 0.036   | 0.395           |
| Gpx7                       | NM_024198                  | ref Mus musculus glutathione peroxidase 7 (Gpx7), mRNA [NM_024198]                                                                          | 0.25                 | 0.046   | 0.444           |
| Zcchc2                     | NM_001122675               | ref Mus musculus zinc finger, CCHC domain containing 2 (Zcchc2), transcript variant B, mRNA [NM_001122675]                                  | 0.25                 | 0.036   | 0.393           |
| ENSMUST00000058162         | ENSMUST00000058162         | ens v-maf musculoaponeurotic fibrosarcoma oncogene family, protein G (avian) Gene [Source:MGI (curated);Acc:MGI:96911] [ENSMUST00000058162] | 0.25                 | 0.014   | 0.256           |
| Fut10                      | NM_001012517               | ref Mus musculus fucosyltransferase 10 (Fut10), transcript variant A, mRNA [NM_001012517]                                                   | 0.25                 | 0.038   | 0.406           |
| ENSMUST00000100649         | ENSMUST00000100649         | ref PREDICTED: Mus musculus similar to ribosomal protein S28 (LOC100039820), mRNA [XM_001474089]                                            | 0.25                 | 0.016   | 0.267           |
| chr13:34027900-34052050_F  | chr13:34027900-34052050_F  | lincRNA:chr13:34027900-34052050 forward strand                                                                                              | 0.25                 | 0.050   | 0.457           |
| chr13:34027900-34052050_F  | chr13:34027900-34052050_F  | lincRNA:chr13:34027900-34052050 forward strand                                                                                              | 0.25                 | 0.050   | 0.457           |
| Coro2b                     | NM_175484                  | ref Mus musculus coronin, actin binding protein, 2B (Coro2b), mRNA [NM_175484]                                                              | 0.25                 | 0.028   | 0.353           |
| Strn                       | NM_011500                  | ref Mus musculus striatin, calmodulin binding protein (Strn), mRNA [NM_011500]                                                              | 0.25                 | 0.034   | 0.384           |
| Atp9a                      | NM_015731                  | ref Mus musculus ATPase, class II, type 9A (Atp9a), mRNA [NM_015731]                                                                        | 0.25                 | 0.022   | 0.310           |
| Ccdc17                     | NM_001037916               | ref Mus musculus coiled-coil domain containing 17 (Ccdc17), mRNA [NM_001037916]                                                             | 0.25                 | 0.040   | 0.415           |
| Abcc5                      | NM_176839                  | ref Mus musculus ATP-binding cassette, sub-family C (CFTR/MRP), member 5 (Abcc5), transcript variant 2, mRNA [NM_176839]                    | 0.25                 | 0.038   | 0.404           |
| Dusp16                     | NM_130447                  | ref Mus musculus dual specificity phosphatase 16 (Dusp16), transcript variant A1, mRNA [NM_130447]                                          | 0.25                 | 0.024   | 0.325           |
| Snx33                      | NM_175483                  | ref Mus musculus sorting nexin 33 (Snx33), mRNA [NM_175483]                                                                                 | 0.25                 | 0.037   | 0.400           |
| Nars                       | NM_027350                  | ref Mus musculus asparaginyl-tRNA synthetase (Nars), transcript variant 2, mRNA [NM_027350]                                                 | 0.25                 | 0.027   | 0.342           |
| Phf1                       | NM_009343                  | ref Mus musculus PHD finger protein 1 (Phf1), mRNA [NM_009343]                                                                              | 0.24                 | 0.047   | 0.446           |
| chr1:141824450-141835125_F | chr1:141824450-141835125_F | lincRNA:chr1:141824450-141835125 forward strand                                                                                             | 0.24                 | 0.048   | 0.449           |
| chr18:75518299-75524782_R  | chr18:75518299-75524782_R  | lincRNA:chr18:75518299-75524782 reverse strand                                                                                              | 0.24                 | 0.027   | 0.344           |
| Slc12a4                    | NM_009195                  | ref Mus musculus solute carrier family 12, member 4 (Slc12a4), mRNA [NM_009195]                                                             | 0.24                 | 0.016   | 0.273           |
| Prkar2b                    | NM_011158                  | ref Mus musculus protein kinase, cAMP dependent regulatory, type II beta (Prkar2b), mRNA [NM_011158]                                        | 0.24                 | 0.048   | 0.452           |
| Cap1                       | NM_007598                  | ref Mus musculus CAP, adenylate cyclase-associated protein 1 (yeast) (Cap1), mRNA [NM_007598]                                               | 0.24                 | 0.035   | 0.391           |
| Eftud1                     | NM_175317                  | ref Mus musculus elongation factor Tu GTP binding domain containing 1 (Eftud1), transcript variant 1, mRNA [NM_175317]                      | 0.24                 | 0.033   | 0.378           |
| 6330503K22Rik              | NM_182995                  | ref Mus musculus RIKEN cDNA 6330503K22 gene (6330503K22Rik), mRNA [NM_182995]                                                               | 0.24                 | 0.024   | 0.326           |



Online Supplemental Table IV: Con-STZ Only

| Gene Symbol                       | RefSeq                     | Description                                                                                                               | logFC<br>Con-<br>STZ | P-value | Adj.<br>P-value |
|-----------------------------------|----------------------------|---------------------------------------------------------------------------------------------------------------------------|----------------------|---------|-----------------|
| <b>Speer4b</b>                    | NM_028561                  | ref Mus musculus spermatogenesis associated glutamate (E)-rich protein 4b (Speer4b), mRNA [NM_028561]                     | 0.24                 | 0.031   | 0.371           |
| <b>Zfp689</b>                     | NM_175163                  | ref Mus musculus zinc finger protein 689 (Zfp689), mRNA [NM_175163]                                                       | 0.24                 | 0.026   | 0.338           |
| <b>Tifa</b>                       | NM_145133                  | ref Mus musculus TRAF-interacting protein with forkhead-associated domain (Tifa), mRNA [NM_145133]                        | 0.24                 | 0.022   | 0.314           |
| <b>ENSMUST00000103474</b>         | ENSMUST00000103474         | ens VH coding region Precursor; Fragment [Source:UniProtKB/TrEMBL;Acc:A2NU21] [ENSMUST00000103474]                        | 0.24                 | 0.048   | 0.451           |
| <b>Tspyl4</b>                     | NM_030203                  | ref Mus musculus TSPY-like 4 (Tspyl4), mRNA [NM_030203]                                                                   | 0.24                 | 0.040   | 0.413           |
| <b>Rnu7</b>                       | NR_024201                  | ref Mus musculus U7 small nuclear RNA (Rnu7), small nuclear RNA [NR_024201]                                               | 0.24                 | 0.022   | 0.310           |
| <b>Mirg</b>                       | NR_028265                  | ref Mus musculus miRNA containing gene (Mirg), non-coding RNA [NR_028265]                                                 | 0.24                 | 0.031   | 0.371           |
| <b>Rbm16</b>                      | NM_134123                  | ref Mus musculus RNA binding motif protein 16 (Rbm16), mRNA [NM_134123]                                                   | 0.24                 | 0.034   | 0.385           |
| <b>Fbxo21</b>                     | NM_145564                  | ref Mus musculus F-box protein 21 (Fbxo21), mRNA [NM_145564]                                                              | 0.24                 | 0.017   | 0.275           |
| <b>Tmem181a</b>                   | NM_001033178               | ref Mus musculus transmembrane protein 181A (Tmem181a), mRNA [NM_001033178]                                               | 0.24                 | 0.010   | 0.211           |
| <b>Litaf</b>                      | NM_019980                  | ref Mus musculus LPS-induced TN factor (Litaf), mRNA [NM_019980]                                                          | 0.24                 | 0.041   | 0.418           |
| <b>Matr3</b>                      | NM_010771                  | ref Mus musculus matrin 3 (Matr3), mRNA [NM_010771]                                                                       | 0.24                 | 0.029   | 0.359           |
| <b>chr5:119945358-119962612_R</b> | chr5:119945358-119962612_R | lincRNA:chr5:119945358-119962612 reverse strand                                                                           | 0.24                 | 0.030   | 0.362           |
| <b>Scap</b>                       | NM_001001144               | ref Mus musculus SREBF chaperone (Scap), transcript variant 1, mRNA [NM_001001144]                                        | 0.24                 | 0.010   | 0.208           |
| <b>Nop58</b>                      | NM_018868                  | ref Mus musculus NOP58 ribonucleoprotein homolog (yeast) (Nop58), mRNA [NM_018868]                                        | 0.24                 | 0.021   | 0.304           |
| <b>Rapgef3</b>                    | NM_144850                  | ref Mus musculus Rap guanine nucleotide exchange factor (GEF) 3 (Rapgef3), transcript variant 2, mRNA [NM_144850]         | 0.24                 | 0.027   | 0.344           |
| <b>Rc3h1</b>                      | NM_001024952               | ref Mus musculus RING CCCH (C3H) domains 1 (Rc3h1), mRNA [NM_001024952]                                                   | 0.24                 | 0.033   | 0.377           |
| <b>4933407C03Rik</b>              | NM_001163262               | ref Mus musculus RIKEN cDNA 4933407C03 gene (4933407C03Rik), transcript variant 1, mRNA [NM_001163262]                    | 0.24                 | 0.025   | 0.331           |
| <b>Rhoc</b>                       | NM_007484                  | ref Mus musculus ras homolog gene family, member C (Rhoc), mRNA [NM_007484]                                               | 0.24                 | 0.029   | 0.356           |
| <b>Hook2</b>                      | NM_133255                  | ref Mus musculus hook homolog 2 (Drosophila) (Hook2), transcript variant 1, mRNA [NM_133255]                              | 0.24                 | 0.017   | 0.278           |
| <b>Pafah1b2</b>                   | NM_008775                  | ref Mus musculus platelet-activating factor acetylhydrolase, isoform 1b, subunit 2 (Pafah1b2), mRNA [NM_008775]           | 0.24                 | 0.040   | 0.417           |
| <b>St7l</b>                       | NM_153091                  | ref Mus musculus suppression of tumorigenicity 7-like (St7l), mRNA [NM_153091]                                            | 0.24                 | 0.035   | 0.391           |
| <b>Lgals3bp</b>                   | NM_011150                  | ref Mus musculus lectin, galactoside-binding, soluble, 3 binding protein (Lgals3bp), mRNA [NM_011150]                     | 0.24                 | 0.046   | 0.442           |
| <b>Ptpn12</b>                     | NM_011203                  | ref Mus musculus protein tyrosine phosphatase, non-receptor type 12 (Ptpn12), mRNA [NM_011203]                            | 0.24                 | 0.035   | 0.391           |
| <b>LOC100040188</b>               | XR_031293                  | ref PREDICTED: Mus musculus similar to spermiogenesis specific transcript on the Y 1 (LOC100040188), misc RNA [XR_031293] | 0.24                 | 0.043   | 0.427           |
| <b>Zfr</b>                        | NM_011767                  | ref Mus musculus zinc finger RNA binding protein (Zfr), mRNA [NM_011767]                                                  | 0.24                 | 0.019   | 0.291           |
| <b>Gm5610</b>                     | XM_486145                  | ref PREDICTED: Mus musculus predicted gene, EG434339 (EG434339), mRNA [XM_486145]                                         | 0.24                 | 0.039   | 0.407           |
| <b>Gm3065</b>                     | XM_001475302               | ref PREDICTED: Mus musculus hypothetical protein LOC100040962 (LOC100040962), mRNA [XM_001475302]                         | 0.24                 | 0.039   | 0.407           |

Online Supplemental Table IV: Con-STZ Only

| Gene Symbol               | RefSeq                    | Description                                                                                                                                           | logFC<br>Con-<br>STZ | P-value | Adj.<br>P-value |
|---------------------------|---------------------------|-------------------------------------------------------------------------------------------------------------------------------------------------------|----------------------|---------|-----------------|
| Cttn                      | NM_007803                 | ref Mus musculus cortactin (Cttn), mRNA [NM_007803]                                                                                                   | 0.24                 | 0.040   | 0.415           |
| Wdfy1                     | NM_001111279              | ref Mus musculus WD repeat and FYVE domain containing 1 (Wdfy1), transcript variant 1, mRNA [NM_001111279]                                            | 0.24                 | 0.025   | 0.330           |
| 4930517G19Rik             | AK015812                  | gb Mus musculus adult male testis cDNA, RIKEN full-length enriched library, clone:4930517G19 product:unclassifiable, full insert sequence. [AK015812] | 0.24                 | 0.025   | 0.332           |
| Ormdl3                    | NM_025661                 | ref Mus musculus ORM1-like 3 (S. cerevisiae) (Ormdl3), mRNA [NM_025661]                                                                               | 0.24                 | 0.018   | 0.286           |
| Prr13                     | NM_025385                 | ref Mus musculus proline rich 13 (Prr13), transcript variant 1, mRNA [NM_025385]                                                                      | 0.24                 | 0.047   | 0.446           |
| Rnf2                      | NM_011277                 | ref Mus musculus ring finger protein 2 (Rnf2), mRNA [NM_011277]                                                                                       | 0.24                 | 0.024   | 0.328           |
| Bax                       | NM_007527                 | ref Mus musculus BCL2-associated X protein (Bax), mRNA [NM_007527]                                                                                    | 0.24                 | 0.043   | 0.428           |
| Dos                       | NM_015761                 | ref Mus musculus downstream of Stk11 (Dos), mRNA [NM_015761]                                                                                          | 0.24                 | 0.034   | 0.383           |
| Cbr3                      | NM_173047                 | ref Mus musculus carbonyl reductase 3 (Cbr3), mRNA [NM_173047]                                                                                        | 0.24                 | 0.017   | 0.279           |
| Nt5c                      | NM_015807                 | ref Mus musculus 5',3'-nucleotidase, cytosolic (Nt5c), mRNA [NM_015807]                                                                               | 0.24                 | 0.030   | 0.365           |
| Tox3                      | ENSMUST00000060304        | ens TOX high mobility group box family member 3 Gene [Source:MGI Symbol;Acc:MGI:3039593] [ENSMUST00000060304]                                         | 0.23                 | 0.037   | 0.399           |
| Cnn3                      | NM_028044                 | ref Mus musculus calponin 3, acidic (Cnn3), mRNA [NM_028044]                                                                                          | 0.23                 | 0.044   | 0.432           |
| Syt11                     | NM_018804                 | ref Mus musculus synaptotagmin XI (Syt11), mRNA [NM_018804]                                                                                           | 0.23                 | 0.031   | 0.370           |
| Serp1                     | NM_030685                 | ref Mus musculus stress-associated endoplasmic reticulum protein 1 (Serp1), mRNA [NM_030685]                                                          | 0.23                 | 0.035   | 0.387           |
| 1110067D22Rik             | NM_173752                 | ref Mus musculus RIKEN cDNA 1110067D22 gene (1110067D22Rik), mRNA [NM_173752]                                                                         | 0.23                 | 0.028   | 0.351           |
| Fcho2                     | NM_172591                 | ref Mus musculus FCH domain only 2 (Fcho2), mRNA [NM_172591]                                                                                          | 0.23                 | 0.030   | 0.360           |
| Nhsl2                     | NM_001163610              | ref Mus musculus NHS-like 2 (Nhsl2), mRNA [NM_001163610]                                                                                              | 0.23                 | 0.037   | 0.396           |
| Zfp655                    | NM_028298                 | ref Mus musculus zinc finger protein 655 (Zfp655), transcript variant 1, mRNA [NM_028298]                                                             | 0.23                 | 0.027   | 0.347           |
| LOC100044968              | XM_001473421              | ref PREDICTED: Mus musculus similar to modulator recognition factor 2 (LOC100044968), mRNA [XM_001473421]                                             | 0.23                 | 0.031   | 0.367           |
| chr12:21548850-21568550_R | chr12:21548850-21568550_R | lincRNA:chr12:21548850-21568550 reverse strand                                                                                                        | 0.23                 | 0.049   | 0.454           |
| ENSMUST00000105041        | ENSMUST00000105041        | ens histocompatibility 2, Q region locus 1 Gene [Source:MGI Symbol;Acc:MGI:95928] [ENSMUST00000105041]                                                | 0.23                 | 0.035   | 0.387           |
| ENSMUST00000030920        | ENSMUST00000030920        | ens RNA binding motif protein 33 Gene [Source:MGI (curated);Acc:MGI:1919670] [ENSMUST00000030920]                                                     | 0.23                 | 0.019   | 0.291           |
| Thrap3                    | NM_146153                 | ref Mus musculus thyroid hormone receptor associated protein 3 (Thrap3), mRNA [NM_146153]                                                             | 0.23                 | 0.023   | 0.317           |
| Fgfr1                     | NM_010206                 | ref Mus musculus fibroblast growth factor receptor 1 (Fgfr1), transcript variant 1, mRNA [NM_010206]                                                  | 0.23                 | 0.032   | 0.374           |
| Gm281                     | XM_138893                 | ref PREDICTED: Mus musculus gene model 281, (NCBI) (Gm281), mRNA [XM_138893]                                                                          | 0.23                 | 0.048   | 0.449           |
| Tcn2                      | NM_015749                 | ref Mus musculus transcobalamin 2 (Tcn2), transcript variant 1, mRNA [NM_015749]                                                                      | 0.23                 | 0.031   | 0.370           |
| Gm6277                    | XM_001474148              | ref PREDICTED: Mus musculus hypothetical protein LOC621998 (LOC621998), mRNA [XM_001474148]                                                           | 0.23                 | 0.038   | 0.401           |
| Zfp236                    | NM_177832                 | ref Mus musculus zinc finger protein 236 (Zfp236), mRNA [NM_177832]                                                                                   | 0.23                 | 0.044   | 0.436           |
| Rps8                      | NM_009098                 | ref Mus musculus ribosomal protein S8 (Rps8), mRNA [NM_009098]                                                                                        | 0.23                 | 0.047   | 0.448           |

Online Supplemental Table IV: Con-STZ Only

| Gene Symbol                      | RefSeq                    | Description                                                                                                                                                     | logFC<br>Con-STZ | P-value | Adj.<br>P-value |
|----------------------------------|---------------------------|-----------------------------------------------------------------------------------------------------------------------------------------------------------------|------------------|---------|-----------------|
| <b>Cblb</b>                      | NM_001033238              | ref Mus musculus Casitas B-lineage lymphoma b (Cblb), mRNA [NM_001033238]                                                                                       | 0.23             | 0.037   | 0.397           |
| <b>Zfp35</b>                     | NM_011755                 | ref Mus musculus zinc finger protein 35 (Zfp35), mRNA [NM_011755]                                                                                               | 0.23             | 0.014   | 0.252           |
| <b>S100pbp</b>                   | NM_029036                 | ref Mus musculus S100P binding protein (S100pbp), mRNA [NM_029036]                                                                                              | 0.23             | 0.030   | 0.360           |
| <b>Sdf4</b>                      | NM_011341                 | ref Mus musculus stromal cell derived factor 4 (Sdf4), mRNA [NM_011341]                                                                                         | 0.23             | 0.011   | 0.225           |
| <b>Ubxn7</b>                     | NM_177633                 | ref Mus musculus UBX domain protein 7 (Ubxn7), mRNA [NM_177633]                                                                                                 | 0.23             | 0.041   | 0.420           |
| <b>Srsf7</b>                     | NM_146083                 | ref Mus musculus serine/arginine-rich splicing factor 7 (Srsf7), mRNA [NM_146083]                                                                               | 0.23             | 0.025   | 0.331           |
| <b>Ntrk3</b>                     | NM_008746                 | ref Mus musculus neurotrophic tyrosine kinase, receptor, type 3 (Ntrk3), transcript variant 1, mRNA [NM_008746]                                                 | 0.23             | 0.033   | 0.377           |
| <b>Mpg</b>                       | NM_010822                 | ref Mus musculus N-methylpurine-DNA glycosylase (Mpg), mRNA [NM_010822]                                                                                         | 0.23             | 0.015   | 0.266           |
| <b>Notch3</b>                    | NM_008716                 | ref Mus musculus Notch gene homolog 3 (Drosophila) (Notch3), mRNA [NM_008716]                                                                                   | 0.23             | 0.042   | 0.423           |
| <b>Mxra8</b>                     | NM_024263                 | ref Mus musculus matrix-remodelling associated 8 (Mxra8), mRNA [NM_024263]                                                                                      | 0.23             | 0.049   | 0.456           |
| <b>Slc22a4</b>                   | NM_019687                 | ref Mus musculus solute carrier family 22 (organic cation transporter), member 4 (Slc22a4), mRNA [NM_019687]                                                    | 0.23             | 0.041   | 0.418           |
| <b>Mlit3</b>                     | NM_027326                 | ref Mus musculus myeloid/lymphoid or mixed-lineage leukemia (trithorax homolog, Drosophila); translocated to, 3 (Mlit3), transcript variant 1, mRNA [NM_027326] | 0.23             | 0.021   | 0.303           |
| <b>Agtbbp1</b>                   | NM_023328                 | ref Mus musculus ATP/GTP binding protein 1 (Agtbbp1), transcript variant 1, mRNA [NM_023328]                                                                    | 0.23             | 0.030   | 0.365           |
| <b>Gmpr2</b>                     | NM_177992                 | ref Mus musculus guanosine monophosphate reductase 2 (Gmpr2), mRNA [NM_177992]                                                                                  | 0.23             | 0.014   | 0.253           |
| <b>Lmna</b>                      | NM_019390                 | ref Mus musculus lamin A (Lmna), transcript variant 2, mRNA [NM_019390]                                                                                         | 0.23             | 0.016   | 0.271           |
| <b>Oxsr1</b>                     | ENSMUST00000040853        | ens oxidative-stress responsive 1 Gene [Source:MGI (curated);Acc:MGI:1917378] [ENSMUST00000040853]                                                              | 0.23             | 0.017   | 0.275           |
| <b>Pskh1</b>                     | NM_173432                 | ref Mus musculus protein serine kinase H1 (Pskh1), mRNA [NM_173432]                                                                                             | 0.23             | 0.049   | 0.456           |
| <b>DCP_20_9</b>                  | DCP_20_9                  |                                                                                                                                                                 | 0.23             | 0.049   | 0.455           |
| <b>Wwc2</b>                      | NM_133791                 | ref Mus musculus WW, C2 and coiled-coil domain containing 2 (Wwc2), mRNA [NM_133791]                                                                            | 0.23             | 0.029   | 0.353           |
| <b>Hprt</b>                      | NM_013556                 | ref Mus musculus hypoxanthine guanine phosphoribosyl transferase (Hprt), mRNA [NM_013556]                                                                       | 0.23             | 0.027   | 0.342           |
| <b>chr12:55844075-55898175_R</b> | chr12:55844075-55898175_R | lincRNA:chr12:55844075-55898175 reverse strand                                                                                                                  | 0.23             | 0.031   | 0.367           |
| <b>Mat2a</b>                     | NM_145569                 | ref Mus musculus methionine adenosyltransferase II, alpha (Mat2a), mRNA [NM_145569]                                                                             | 0.23             | 0.047   | 0.448           |
| <b>Tmcc3</b>                     | NM_172051                 | ref Mus musculus transmembrane and coiled coil domains 3 (Tmcc3), transcript variant 1, mRNA [NM_172051]                                                        | 0.23             | 0.022   | 0.314           |
| <b>Bcam</b>                      | NM_020486                 | ref Mus musculus basal cell adhesion molecule (Bcam), mRNA [NM_020486]                                                                                          | 0.23             | 0.013   | 0.242           |
| <b>Hexa</b>                      | NM_010421                 | ref Mus musculus hexosaminidase A (Hexa), mRNA [NM_010421]                                                                                                      | 0.23             | 0.036   | 0.392           |
| <b>chr1:52507332-52514490_R</b>  | chr1:52507332-52514490_R  | lincRNA:chr1:52507332-52514490 reverse strand                                                                                                                   | 0.23             | 0.020   | 0.301           |
| <b>Orai2</b>                     | NM_178751                 | ref Mus musculus ORAI calcium release-activated calcium modulator 2 (Orai2), mRNA [NM_178751]                                                                   | 0.22             | 0.017   | 0.275           |
| <b>Seh1l</b>                     | NM_028112                 | ref Mus musculus SEH1-like (S. cerevisiae (Seh1l), transcript variant 2, mRNA [NM_028112]                                                                       | 0.22             | 0.050   | 0.457           |
| <b>Tle3</b>                      | NM_001083927              | ref Mus musculus transducin-like enhancer of split 3, homolog of Drosophila E(spl) (Tle3), transcript variant 1, mRNA [NM_001083927]                            | 0.22             | 0.020   | 0.301           |
| <b>Acap2</b>                     | NM_030138                 | ref Mus musculus ArfGAP with coiled-coil, ankyrin repeat and PH domains 2 (Acap2), mRNA [NM_030138]                                                             | 0.22             | 0.016   | 0.269           |

| Online Supplemental Table IV: Con-STZ Only |                    |                                                                                                                                                                                                                              |                  |         |                 |
|--------------------------------------------|--------------------|------------------------------------------------------------------------------------------------------------------------------------------------------------------------------------------------------------------------------|------------------|---------|-----------------|
| Gene Symbol                                | RefSeq             | Description                                                                                                                                                                                                                  | logFC<br>Con-STZ | P-value | Adj.<br>P-value |
| Paox                                       | NM_153783          | ref Mus musculus polyamine oxidase (exo-N4-amino) (Paox), mRNA [NM_153783]                                                                                                                                                   | 0.22             | 0.043   | 0.428           |
| Jub                                        | NM_010590          | ref Mus musculus ajuba (Jub), mRNA [NM_010590]                                                                                                                                                                               | 0.22             | 0.012   | 0.237           |
| Fam115a                                    | NM_029930          | ref Mus musculus family with sequence similarity 115, member A (Fam115a), mRNA [NM_029930]                                                                                                                                   | 0.22             | 0.040   | 0.413           |
| Ggh                                        | NM_010281          | ref Mus musculus gamma-glutamyl hydrolase (Ggh), mRNA [NM_010281]                                                                                                                                                            | 0.22             | 0.041   | 0.422           |
| Ablim2                                     | NM_001177696       | ref Mus musculus actin-binding LIM protein 2 (Ablim2), transcript variant 1, mRNA [NM_001177696]                                                                                                                             | 0.22             | 0.032   | 0.374           |
| LOC673642                                  | XR_030560          | ref PREDICTED: Mus musculus similar to esterase D/formylglutathione hydrolase (LOC673642), misc RNA [XR_030560]                                                                                                              | 0.22             | 0.032   | 0.376           |
| Kremen1                                    | NM_032396          | ref Mus musculus kringle containing transmembrane protein 1 (Kremen1), mRNA [NM_032396]                                                                                                                                      | 0.22             | 0.020   | 0.295           |
| Tnpo1                                      | NM_178716          | ref Mus musculus transportin 1 (Tnpo1), transcript variant 1, mRNA [NM_178716]                                                                                                                                               | 0.22             | 0.037   | 0.399           |
| Tbrg1                                      | NM_025289          | ref Mus musculus transforming growth factor beta regulated gene 1 (Tbrg1), mRNA [NM_025289]                                                                                                                                  | 0.22             | 0.020   | 0.296           |
| Dlg5                                       | NM_001163513       | ref Mus musculus discs, large homolog 5 (Drosophila) (Dlg5), transcript variant 1, mRNA [NM_001163513]                                                                                                                       | 0.22             | 0.042   | 0.426           |
| Seh1l                                      | NM_001039088       | ref Mus musculus SEH1-like (S. cerevisiae) (Seh1l), transcript variant 1, mRNA [NM_001039088]                                                                                                                                | 0.22             | 0.040   | 0.417           |
| Trip10                                     | NM_134125          | ref Mus musculus thyroid hormone receptor interactor 10 (Trip10), mRNA [NM_134125]                                                                                                                                           | 0.22             | 0.046   | 0.445           |
| ENSMUST00000065259                         | ENSMUST00000065259 | ens Putative uncharacterized proteinTnks protein ; [Source:UniProtKB/TrEMBL;Acc:Q8BND2] [ENSMUST00000065259]                                                                                                                 | 0.22             | 0.023   | 0.321           |
| Cttn                                       | NM_007803          | ref Mus musculus cortactin (Cttn), mRNA [NM_007803]                                                                                                                                                                          | 0.22             | 0.047   | 0.446           |
| Ctu2                                       | NM_153775          | ref Mus musculus cytosolic thiouridylase subunit 2 homolog (S. pombe) (Ctu2), mRNA [NM_153775]                                                                                                                               | 0.22             | 0.032   | 0.372           |
| Ndst2                                      | NM_010811          | ref Mus musculus N-deacetylase/N-sulfotransferase (heparan glucosaminyl) 2 (Ndst2), mRNA [NM_010811]                                                                                                                         | 0.22             | 0.040   | 0.416           |
| Hadhb                                      | NM_145558          | ref Mus musculus hydroxyacyl-Coenzyme A dehydrogenase/3-ketoacyl-Coenzyme A thiolase/enoyl-Coenzyme A hydratase (trifunctional protein), beta subunit (Hadhb), nuclear gene encoding mitochondrial protein, mRNA [NM_145558] | 0.22             | 0.030   | 0.359           |
| Zfp593                                     | NM_024215          | ref Mus musculus zinc finger protein 593 (Zfp593), mRNA [NM_024215]                                                                                                                                                          | 0.22             | 0.019   | 0.291           |
| Tor1aip2                                   | NM_172843          | ref Mus musculus torsin A interacting protein 2 (Tor1aip2), transcript variant 5, mRNA [NM_172843]                                                                                                                           | 0.22             | 0.032   | 0.375           |
| Txndc12                                    | NM_025334          | ref Mus musculus thioredoxin domain containing 12 (endoplasmic reticulum) (Txndc12), mRNA [NM_025334]                                                                                                                        | 0.22             | 0.018   | 0.286           |
| Tmem30a                                    | NM_133718          | ref Mus musculus transmembrane protein 30A (Tmem30a), mRNA [NM_133718]                                                                                                                                                       | 0.22             | 0.043   | 0.430           |
| Mgat5b                                     | NM_172948          | ref Mus musculus mannoside acetylglucosaminyltransferase 5, isoenzyme B (Mgat5b), mRNA [NM_172948]                                                                                                                           | 0.22             | 0.026   | 0.338           |
| Aida                                       | NM_181732          | ref Mus musculus axin interactor, dorsalization associated (Aida), mRNA [NM_181732]                                                                                                                                          | 0.22             | 0.029   | 0.354           |
| Spef1                                      | NM_027641          | ref Mus musculus sperm flagellar 1 (Spef1), mRNA [NM_027641]                                                                                                                                                                 | 0.22             | 0.029   | 0.355           |
| 1500010J02Rik                              | NM_001013256       | ref Mus musculus RIKEN cDNA 1500010J02 gene (1500010J02Rik), transcript variant 1, mRNA [NM_001013256]                                                                                                                       | 0.22             | 0.033   | 0.378           |
| Spag9                                      | NM_027569          | ref Mus musculus sperm associated antigen 9 (Spag9), transcript variant 1, mRNA [NM_027569]                                                                                                                                  | 0.22             | 0.044   | 0.432           |
| Mtap4                                      | NM_008633          | ref Mus musculus microtubule-associated protein 4 (Mtap4), mRNA [NM_008633]                                                                                                                                                  | 0.22             | 0.042   | 0.424           |
| Mettl9                                     | NM_021554          | ref Mus musculus methyltransferase like 9 (Mettl9), mRNA [NM_021554]                                                                                                                                                         | 0.22             | 0.015   | 0.266           |
| Gm14398                                    | XR_034640          | ref PREDICTED: Mus musculus hypothetical LOC622592 (LOC622592), misc RNA [XR_034640]                                                                                                                                         | 0.22             | 0.043   | 0.428           |

Online Supplemental Table IV: Con-STZ Only

| Gene Symbol                       | RefSeq                     | Description                                                                                                                             | logFC<br>Con-STZ | P-value | Adj.<br>P-value |
|-----------------------------------|----------------------------|-----------------------------------------------------------------------------------------------------------------------------------------|------------------|---------|-----------------|
| <b>Cdk9</b>                       | NM_130860                  | ref Mus musculus cyclin-dependent kinase 9 (CDC2-related kinase) (Cdk9), mRNA [NM_130860]                                               | 0.22             | 0.021   | 0.309           |
| <b>Tax1bp3</b>                    | NM_029564                  | ref Mus musculus Tax1 (human T-cell leukemia virus type I) binding protein 3 (Tax1bp3), mRNA [NM_029564]                                | 0.21             | 0.042   | 0.422           |
| <b>1110034B05Rik</b>              | NM_001037742               | ref Mus musculus RIKEN cDNA 1110034B05 gene (1110034B05Rik), transcript variant 1, mRNA [NM_001037742]                                  | 0.21             | 0.027   | 0.346           |
| <b>Itgb1</b>                      | NM_010578                  | ref Mus musculus integrin beta 1 (fibronectin receptor beta) (Itgb1), mRNA [NM_010578]                                                  | 0.21             | 0.037   | 0.396           |
| <b>Dlc1</b>                       | NM_015802                  | ref Mus musculus deleted in liver cancer 1 (Dlc1), mRNA [NM_015802]                                                                     | 0.21             | 0.013   | 0.242           |
| <b>Zfp593</b>                     | NM_024215                  | ref Mus musculus zinc finger protein 593 (Zfp593), mRNA [NM_024215]                                                                     | 0.21             | 0.026   | 0.340           |
| <b>LOC100044943</b>               | XM_001473306               | ref PREDICTED: Mus musculus similar to DAZ associated protein 2 (LOC100044943), mRNA [XM_001473306]                                     | 0.21             | 0.046   | 0.443           |
| <b>Zfp592</b>                     | NM_178707                  | ref Mus musculus zinc finger protein 592 (Zfp592), mRNA [NM_178707]                                                                     | 0.21             | 0.027   | 0.348           |
| <b>Gba</b>                        | NM_001077411               | ref Mus musculus glucosidase, beta, acid (Gba), transcript variant 2, mRNA [NM_001077411]                                               | 0.21             | 0.033   | 0.378           |
| <b>Il17rd</b>                     | NM_134437                  | ref Mus musculus interleukin 17 receptor D (Il17rd), mRNA [NM_134437]                                                                   | 0.21             | 0.030   | 0.365           |
| <b>Smarcal1</b>                   | AF088884                   | gb Mus musculus HepA-related protein Harp mRNA, complete cds. [AF088884]                                                                | 0.21             | 0.040   | 0.415           |
| <b>Rnf19a</b>                     | NM_013923                  | ref Mus musculus ring finger protein 19A (Rnf19a), mRNA [NM_013923]                                                                     | 0.21             | 0.039   | 0.409           |
| <b>chr2:152172745-152184745_R</b> | chr2:152172745-152184745_R | lincRNA:chr2:152172745-152184745 reverse strand                                                                                         | 0.21             | 0.041   | 0.419           |
| <b>Scp2</b>                       | NM_011327                  | ref Mus musculus sterol carrier protein 2, liver (Scp2), mRNA [NM_011327]                                                               | 0.21             | 0.047   | 0.447           |
| <b>Tjap1</b>                      | NM_028751                  | ref Mus musculus tight junction associated protein 1 (Tjap1), mRNA [NM_028751]                                                          | 0.21             | 0.038   | 0.407           |
| <b>Klhl22</b>                     | NM_145479                  | ref Mus musculus kelch-like 22 (Drosophila) (Klhl22), mRNA [NM_145479]                                                                  | 0.21             | 0.048   | 0.449           |
| <b>Smurf2</b>                     | NM_025481                  | ref Mus musculus SMAD specific E3 ubiquitin protein ligase 2 (Smurf2), mRNA [NM_025481]                                                 | 0.21             | 0.037   | 0.401           |
| <b>Nsa2</b>                       | NM_021552                  | ref Mus musculus NSA2 ribosome biogenesis homolog (S. cerevisiae) (Nsa2), mRNA [NM_021552]                                              | 0.21             | 0.025   | 0.332           |
| <b>Vezf1</b>                      | NM_016686                  | ref Mus musculus vascular endothelial zinc finger 1 (Vezf1), mRNA [NM_016686]                                                           | 0.21             | 0.017   | 0.279           |
| <b>Sec24d</b>                     | NM_027135                  | ref Mus musculus Sec24 related gene family, member D (S. cerevisiae) (Sec24d), mRNA [NM_027135]                                         | 0.21             | 0.020   | 0.294           |
| <b>Gas8</b>                       | NM_018855                  | ref Mus musculus growth arrest specific 8 (Gas8), mRNA [NM_018855]                                                                      | 0.21             | 0.028   | 0.353           |
| <b>Zfp764</b>                     | NM_146203                  | ref Mus musculus zinc finger protein 764 (Zfp764), transcript variant 1, mRNA [NM_146203]                                               | 0.21             | 0.022   | 0.311           |
| <b>Acadvl</b>                     | NM_017366                  | ref Mus musculus acyl-Coenzyme A dehydrogenase, very long chain (Acadvl), nuclear gene encoding mitochondrial protein, mRNA [NM_017366] | 0.21             | 0.023   | 0.317           |
| <b>Rlf</b>                        | NM_001081013               | ref Mus musculus rearranged L-myc fusion sequence (Rlf), mRNA [NM_001081013]                                                            | 0.21             | 0.037   | 0.399           |
| <b>Srsf3</b>                      | NM_013663                  | ref Mus musculus serine/arginine-rich splicing factor 3 (Srsf3), mRNA [NM_013663]                                                       | 0.21             | 0.027   | 0.346           |
| <b>Dennd2a</b>                    | NM_172477                  | ref Mus musculus DENN/MADD domain containing 2A (Dennd2a), mRNA [NM_172477]                                                             | 0.21             | 0.017   | 0.275           |
| <b>Eif3m</b>                      | NM_145380                  | ref Mus musculus eukaryotic translation initiation factor 3, subunit M (Eif3m), mRNA [NM_145380]                                        | 0.20             | 0.028   | 0.351           |
| <b>Ddx21</b>                      | NM_019553                  | ref Mus musculus DEAD (Asp-Glu-Ala-Asp) box polypeptide 21 (Ddx21), mRNA [NM_019553]                                                    | 0.20             | 0.023   | 0.318           |
| <b>Acot9</b>                      | NM_019736                  | ref Mus musculus acyl-CoA thioesterase 9 (Acot9), nuclear gene encoding mitochondrial protein, mRNA [NM_019736]                         | 0.20             | 0.035   | 0.387           |

Online Supplemental Table IV: Con-STZ Only

| Gene Symbol                | RefSeq                     | Description                                                                                                                                 | logFC<br>Con-<br>STZ | P-value | Adj.<br>P-value |
|----------------------------|----------------------------|---------------------------------------------------------------------------------------------------------------------------------------------|----------------------|---------|-----------------|
| Rnf4                       | NM_011278                  | ref Mus musculus ring finger protein 4 (Rnf4), mRNA [NM_011278]                                                                             | 0.20                 | 0.016   | 0.272           |
| Eif3h                      | NM_080635                  | ref Mus musculus eukaryotic translation initiation factor 3, subunit H (Eif3h), mRNA [NM_080635]                                            | 0.20                 | 0.029   | 0.353           |
| Smarcal1                   | NM_018817                  | ref Mus musculus SWI/SNF related matrix associated, actin dependent regulator of chromatin, subfamily a-like 1 (Smarcal1), mRNA [NM_018817] | 0.20                 | 0.042   | 0.425           |
| Arid1a                     | NM_001080819               | ref Mus musculus AT rich interactive domain 1A (SWI-like) (Arid1a), mRNA [NM_001080819]                                                     | 0.20                 | 0.035   | 0.387           |
| Klhl5                      | NM_175174                  | ref Mus musculus kelch-like 5 (Drosophila) (Klhl5), mRNA [NM_175174]                                                                        | 0.20                 | 0.049   | 0.455           |
| ENSMUST00000091492         | ENSMUST00000091492         | ref PREDICTED: Mus musculus similar to ribosomal protein S28 (LOC621588), mRNA [XM_001477527]                                               | 0.20                 | 0.018   | 0.285           |
| Tef                        | NM_017376                  | ref Mus musculus thyrotroph embryonic factor (Tef), transcript variant 1, mRNA [NM_017376]                                                  | 0.20                 | 0.048   | 0.450           |
| Man2b1                     | NM_010764                  | ref Mus musculus mannosidase 2, alpha B1 (Man2b1), mRNA [NM_010764]                                                                         | 0.20                 | 0.024   | 0.327           |
| Phf13                      | NM_172705                  | ref Mus musculus PHD finger protein 13 (Phf13), mRNA [NM_172705]                                                                            | 0.20                 | 0.025   | 0.332           |
| Actn2                      | NM_033268                  | ref Mus musculus actinin alpha 2 (Actn2), mRNA [NM_033268]                                                                                  | 0.20                 | 0.022   | 0.314           |
| ENSMUST00000085163         | ENSMUST00000085163         | ref PREDICTED: Mus musculus similar to 40S ribosomal protein S28 (LOC100042171), mRNA [XM_001477681]                                        | 0.20                 | 0.027   | 0.342           |
| chr8:114477602-114488627_F | chr8:114477602-114488627_F | lincRNA:chr8:114477602-114488627 forward strand                                                                                             | 0.20                 | 0.047   | 0.446           |
| Bbs9                       | NM_178415                  | ref Mus musculus Bardet-Biedl syndrome 9 (human) (Bbs9), transcript variant 1, mRNA [NM_178415]                                             | 0.20                 | 0.044   | 0.433           |
| Sumf1                      | NM_145937                  | ref Mus musculus sulfatase modifying factor 1 (Sumf1), mRNA [NM_145937]                                                                     | 0.20                 | 0.050   | 0.458           |
| Flot1                      | NM_008027                  | ref Mus musculus flotillin 1 (Flot1), mRNA [NM_008027]                                                                                      | 0.20                 | 0.028   | 0.351           |
| Fam63a                     | NM_133858                  | ref Mus musculus family with sequence similarity 63, member A (Fam63a), mRNA [NM_133858]                                                    | 0.20                 | 0.048   | 0.452           |
| BC031781                   | NM_145943                  | ref Mus musculus cDNA sequence BC031781 (BC031781), mRNA [NM_145943]                                                                        | 0.20                 | 0.040   | 0.415           |
| Accn4                      | NM_183022                  | ref Mus musculus amiloride-sensitive cation channel 4, pituitary (Accn4), mRNA [NM_183022]                                                  | 0.20                 | 0.036   | 0.395           |
| 1500011H22Rik              | NM_026883                  | ref Mus musculus RIKEN cDNA 1500011H22 gene (1500011H22Rik), mRNA [NM_026883]                                                               | 0.20                 | 0.024   | 0.329           |
| Il6st                      | NM_010560                  | ref Mus musculus interleukin 6 signal transducer (Il6st), mRNA [NM_010560]                                                                  | 0.20                 | 0.033   | 0.380           |
| Ap2m1                      | NM_009679                  | ref Mus musculus adaptor protein complex AP-2, mu 1 (Ap2m1), mRNA [NM_009679]                                                               | 0.20                 | 0.049   | 0.455           |
| Tpd52                      | NM_001025262               | ref Mus musculus tumor protein D52 (Tpd52), transcript variant 2, mRNA [NM_001025262]                                                       | 0.20                 | 0.032   | 0.372           |
| Gm6506                     | XM_001478894               | ref PREDICTED: Mus musculus hypothetical LOC624454 (LOC624454), mRNA [XM_001478894]                                                         | 0.20                 | 0.033   | 0.379           |
| Arhgef6                    | NM_152801                  | ref Mus musculus Rac/Cdc42 guanine nucleotide exchange factor (GEF) 6 (Arhgef6), mRNA [NM_152801]                                           | 0.20                 | 0.037   | 0.399           |
| Hcls1                      | NM_008225                  | ref Mus musculus hematopoietic cell specific Lyn substrate 1 (Hcls1), mRNA [NM_008225]                                                      | 0.19                 | 0.026   | 0.336           |
| Dph5                       | NM_027193                  | ref Mus musculus DPH5 homolog (S. cerevisiae) (Dph5), mRNA [NM_027193]                                                                      | 0.19                 | 0.026   | 0.337           |
| Dph1                       | NM_144491                  | ref Mus musculus DPH1 homolog (S. cerevisiae) (Dph1), mRNA [NM_144491]                                                                      | 0.19                 | 0.030   | 0.362           |
| Ppp1r9b                    | NM_172261                  | ref Mus musculus protein phosphatase 1, regulatory subunit 9B (Ppp1r9b), mRNA [NM_172261]                                                   | 0.19                 | 0.040   | 0.416           |
| Iars                       | NM_172015                  | ref Mus musculus isoleucine-tRNA synthetase (Iars), mRNA [NM_172015]                                                                        | 0.19                 | 0.032   | 0.372           |
| Tbc1d5                     | NM_028162                  | ref Mus musculus TBC1 domain family, member 5 (Tbc1d5), mRNA [NM_028162]                                                                    | 0.19                 | 0.029   | 0.356           |
| Mocos                      | NM_026779                  | ref Mus musculus molybdenum cofactor sulfuryase (Mocos), mRNA [NM_026779]                                                                   | 0.19                 | 0.037   | 0.398           |



Online Supplemental Table IV: Con-STZ Only

| Gene Symbol                | RefSeq                     | Description                                                                                                                                   | logFC<br>Con-STZ | P-value | Adj.<br>P-value |
|----------------------------|----------------------------|-----------------------------------------------------------------------------------------------------------------------------------------------|------------------|---------|-----------------|
| LOC270362                  | XM_905656                  | ref PREDICTED: Mus musculus similar to acidic ribosomal phosphoprotein P1 (LOC270362), mRNA [XM_905656]                                       | 0.19             | 0.041   | 0.418           |
| Smurf2                     | NM_025481                  | ref Mus musculus SMAD specific E3 ubiquitin protein ligase 2 (Smurf2), mRNA [NM_025481]                                                       | 0.19             | 0.042   | 0.426           |
| Syap1                      | NM_025932                  | ref Mus musculus synapse associated protein 1 (Syap1), mRNA [NM_025932]                                                                       | 0.19             | 0.032   | 0.376           |
| Gnptg                      | NM_172529                  | ref Mus musculus N-acetylglucosamine-1-phosphotransferase, gamma subunit (Gnptg), mRNA [NM_172529]                                            | 0.19             | 0.045   | 0.438           |
| Nup153                     | NM_175749                  | ref Mus musculus nucleoporin 153 (Nup153), mRNA [NM_175749]                                                                                   | 0.19             | 0.046   | 0.444           |
| Dcaf13                     | NM_198606                  | ref Mus musculus DDB1 and CUL4 associated factor 13 (Dcaf13), mRNA [NM_198606]                                                                | 0.19             | 0.039   | 0.412           |
| Hook2                      | NM_133255                  | ref Mus musculus hook homolog 2 (Drosophila) (Hook2), transcript variant 1, mRNA [NM_133255]                                                  | 0.19             | 0.041   | 0.418           |
| LOC100048326               | XR_034501                  | ref PREDICTED: Mus musculus similar to Acidic ribosomal phosphoprotein P0 (LOC100048326), misc RNA [XR_034501]                                | 0.19             | 0.047   | 0.448           |
| Gnas                       | NM_001077510               | ref Mus musculus GNAS (guanine nucleotide binding protein, alpha stimulating) complex locus (Gnas), transcript variant 8, mRNA [NM_001077510] | 0.19             | 0.033   | 0.376           |
| Rpl12-ps1                  | ENSMUST00000116168         | ref PREDICTED: Mus musculus predicted gene, EG633570 (EG633570), mRNA [XM_001001613]                                                          | 0.18             | 0.031   | 0.368           |
| Ddx42                      | NM_028074                  | ref Mus musculus DEAD (Asp-Glu-Ala-Asp) box polypeptide 42 (Ddx42), mRNA [NM_028074]                                                          | 0.18             | 0.034   | 0.383           |
| Chmp4b                     | NM_029362                  | ref Mus musculus chromatin modifying protein 4B (Chmp4b), mRNA [NM_029362]                                                                    | 0.18             | 0.027   | 0.344           |
| Klraq1                     | NM_028658                  | ref Mus musculus KLRAQ motif containing 1 (Klraq1), mRNA [NM_028658]                                                                          | 0.18             | 0.042   | 0.422           |
| Ifitm2                     | NM_030694                  | ref Mus musculus interferon induced transmembrane protein 2 (Ifitm2), mRNA [NM_030694]                                                        | 0.18             | 0.034   | 0.383           |
| Gar1                       | NM_026578                  | ref Mus musculus GAR1 ribonucleoprotein homolog (yeast) (Gar1), mRNA [NM_026578]                                                              | 0.18             | 0.042   | 0.423           |
| Nat6                       | NM_019750                  | ref Mus musculus N-acetyltransferase 6 (Nat6), mRNA [NM_019750]                                                                               | 0.18             | 0.047   | 0.448           |
| chr8:119732348-119749198_F | chr8:119732348-119749198_F | lincRNA:chr8:119732348-119749198 forward strand                                                                                               | 0.17             | 0.050   | 0.457           |
| Gm14730                    | XR_031372                  | ref PREDICTED: Mus musculus similar to heterogeneous nuclear ribonucleoprotein A3 (LOC547219), misc RNA [XR_031372]                           | 0.17             | 0.049   | 0.456           |
| Strada                     | NM_028126                  | ref Mus musculus STE20-related kinase adaptor alpha (Strada), mRNA [NM_028126]                                                                | 0.17             | 0.043   | 0.428           |
| Naa35                      | NM_030153                  | ref Mus musculus N(alpha)-acetyltransferase 35, NatC auxiliary subunit (Naa35), mRNA [NM_030153]                                              | 0.17             | 0.042   | 0.423           |
| Clk4                       | NM_007714                  | ref Mus musculus CDC like kinase 4 (Clk4), mRNA [NM_007714]                                                                                   | 0.17             | 0.044   | 0.432           |
| Cdad1                      | NM_027986                  | ref Mus musculus cytidine and dCMP deaminase domain containing 1 (Cdad1), transcript variant 2, mRNA [NM_027986]                              | 0.16             | 0.045   | 0.438           |
| Npep1                      | NM_213733                  | ref Mus musculus aminopeptidase-like 1 (Npep1), mRNA [NM_213733]                                                                              | -0.16            | 0.050   | 0.457           |
| Map2k2                     | NM_023138                  | ref Mus musculus mitogen-activated protein kinase kinase 2 (Map2k2), mRNA [NM_023138]                                                         | -0.16            | 0.050   | 0.457           |
| Snx25                      | NM_207213                  | ref Mus musculus sorting nexin 25 (Snx25), mRNA [NM_207213]                                                                                   | -0.17            | 0.048   | 0.451           |
| Pdcl                       | NM_026176                  | ref Mus musculus phosducin-like (Pdcl), mRNA [NM_026176]                                                                                      | -0.17            | 0.038   | 0.407           |
| Mmgt1                      | NM_146234                  | ref Mus musculus membrane magnesium transporter 1 (Mmgt1), mRNA [NM_146234]                                                                   | -0.17            | 0.047   | 0.447           |
| Gm12693                    | XM_001472546               | ref PREDICTED: Mus musculus similar to small androgen receptor-interacting protein (LOC100039252), mRNA [XM_001472546]                        | -0.17            | 0.044   | 0.431           |

Online Supplemental Table IV: Con-STZ Only

| Gene Symbol        | RefSeq             | Description                                                                                                                                       | logFC<br>Con-STZ | P-value | Adj.<br>P-value |
|--------------------|--------------------|---------------------------------------------------------------------------------------------------------------------------------------------------|------------------|---------|-----------------|
| Ube2d3             | NM_025356          | ref Mus musculus ubiquitin-conjugating enzyme E2D 3 (UBC4/5 homolog, yeast) (Ube2d3), mRNA [NM_025356]                                            | -0.17            | 0.043   | 0.428           |
| Gtf3a              | NM_025652          | ref Mus musculus general transcription factor III A (Gtf3a), mRNA [NM_025652]                                                                     | -0.17            | 0.045   | 0.436           |
| 1700040I03Rik      | NM_001163427       | ref Mus musculus RIKEN cDNA 1700040I03 gene (1700040I03Rik), transcript variant 2, mRNA [NM_001163427]                                            | -0.17            | 0.044   | 0.435           |
| Sec23a             | NM_009147          | ref Mus musculus SEC23A (S. cerevisiae) (Sec23a), mRNA [NM_009147]                                                                                | -0.18            | 0.050   | 0.458           |
| Brwd1              | NM_145125          | ref Mus musculus bromodomain and WD repeat domain containing 1 (Brwd1), transcript variant 1, mRNA [NM_145125]                                    | -0.18            | 0.033   | 0.376           |
| Zc3hc1             | NM_172735          | ref Mus musculus zinc finger, C3HC type 1 (Zc3hc1), mRNA [NM_172735]                                                                              | -0.18            | 0.048   | 0.449           |
| Ept1               | NM_027652          | ref Mus musculus ethanolaminephosphotransferase 1 (CDP-ethanolamine-specific) (Ept1), mRNA [NM_027652]                                            | -0.18            | 0.041   | 0.421           |
| Usmg5              | NM_023211          | ref Mus musculus upregulated during skeletal muscle growth 5 (Usmg5), mRNA [NM_023211]                                                            | -0.18            | 0.030   | 0.360           |
| Ndufb4             | NM_026610          | ref Mus musculus NADH dehydrogenase (ubiquinone) 1 beta subcomplex 4 (Ndufb4), nuclear gene encoding mitochondrial protein, mRNA [NM_026610]      | -0.18            | 0.048   | 0.451           |
| Tmpo               | NM_001080129       | ref Mus musculus thymopoietin (Tmpo), transcript variant 3, mRNA [NM_001080129]                                                                   | -0.18            | 0.032   | 0.374           |
| Gm6415             | XM_889816          | ref PREDICTED: Mus musculus predicted gene, EG623286 (EG623286), mRNA [XM_889816]                                                                 | -0.18            | 0.040   | 0.417           |
| Fastkd3            | NM_027123          | ref Mus musculus FAST kinase domains 3 (Fastkd3), mRNA [NM_027123]                                                                                | -0.18            | 0.048   | 0.451           |
| ENSMUST00000097276 | ENSMUST00000097276 | ens Putative uncharacterized protein [Source:UniProtKB/TrEMBL;Acc:Q3TYI1] [ENSMUST00000097276]                                                    | -0.18            | 0.041   | 0.418           |
| Apip               | NM_019735          | ref Mus musculus APAF1 interacting protein (Apip), mRNA [NM_019735]                                                                               | -0.18            | 0.042   | 0.423           |
| Uqcr11             | NM_025650          | ref Mus musculus ubiquinol-cytochrome c reductase, complex III subunit XI (Uqcr11), nuclear gene encoding mitochondrial protein, mRNA [NM_025650] | -0.18            | 0.046   | 0.441           |
| Ece2               | NM_025462          | ref Mus musculus endothelin converting enzyme 2 (Ece2), transcript variant 3, mRNA [NM_025462]                                                    | -0.18            | 0.041   | 0.419           |
| Armc8              | NM_028768          | ref Mus musculus armadillo repeat containing 8 (Armc8), transcript variant 1, mRNA [NM_028768]                                                    | -0.18            | 0.037   | 0.396           |
| Tmem131            | NM_018872          | ref Mus musculus transmembrane protein 131 (Tmem131), mRNA [NM_018872]                                                                            | -0.18            | 0.032   | 0.372           |
| Wdyhv1             | NM_029734          | ref Mus musculus WDYHV motif containing 1 (Wdyhv1), mRNA [NM_029734]                                                                              | -0.18            | 0.044   | 0.430           |
| Atg12              | NM_026217          | ref Mus musculus autophagy-related 12 (yeast) (Atg12), mRNA [NM_026217]                                                                           | -0.18            | 0.035   | 0.388           |
| Hras1              | NM_008284          | ref Mus musculus Harvey rat sarcoma virus oncogene 1 (Hras1), transcript variant 1, mRNA [NM_008284]                                              | -0.19            | 0.044   | 0.435           |
| Uck1               | NM_011675          | ref Mus musculus uridine-cytidine kinase 1 (Uck1), mRNA [NM_011675]                                                                               | -0.19            | 0.046   | 0.444           |
| Aagab              | NM_025857          | ref Mus musculus alpha- and gamma-adaptin binding protein (Aagab), mRNA [NM_025857]                                                               | -0.19            | 0.038   | 0.405           |
| Uqcrq              | NM_025352          | ref Mus musculus ubiquinol-cytochrome c reductase, complex III subunit VII (Uqcrq), nuclear gene encoding mitochondrial protein, mRNA [NM_025352] | -0.19            | 0.035   | 0.388           |
| B230118H07Rik      | NM_026592          | ref Mus musculus RIKEN cDNA B230118H07 gene (B230118H07Rik), mRNA [NM_026592]                                                                     | -0.19            | 0.040   | 0.415           |
| Cyc1               | NM_025567          | ref Mus musculus cytochrome c-1 (Cyc1), nuclear gene encoding mitochondrial protein, mRNA [NM_025567]                                             | -0.19            | 0.031   | 0.371           |
| Ubl4               | NM_145405          | ref Mus musculus ubiquitin-like 4 (Ubl4), mRNA [NM_145405]                                                                                        | -0.19            | 0.041   | 0.421           |

Online Supplemental Table IV: Con-STZ Only

| Gene Symbol               | RefSeq                    | Description                                                                                                                                             | logFC<br>Con-STZ | P-value | Adj.<br>P-value |
|---------------------------|---------------------------|---------------------------------------------------------------------------------------------------------------------------------------------------------|------------------|---------|-----------------|
| Mrps21                    | NM_078479                 | ref Mus musculus mitochondrial ribosomal protein S21 (Mrps21), nuclear gene encoding mitochondrial protein, mRNA [NM_078479]                            | -0.19            | 0.039   | 0.411           |
| Hmbs                      | NM_013551                 | ref Mus musculus hydroxymethylbilane synthase (Hmbs), transcript variant 1, mRNA [NM_013551]                                                            | -0.19            | 0.050   | 0.458           |
| Copz2                     | NM_019877                 | ref Mus musculus coatomer protein complex, subunit zeta 2 (Copz2), mRNA [NM_019877]                                                                     | -0.19            | 0.045   | 0.439           |
| Hps4                      | NM_138646                 | ref Mus musculus Hermansky-Pudlak syndrome 4 homolog (human) (Hps4), mRNA [NM_138646]                                                                   | -0.19            | 0.035   | 0.387           |
| Llg12                     | NM_145438                 | ref Mus musculus lethal giant larvae homolog 2 (Drosophila) (Llg12), mRNA [NM_145438]                                                                   | -0.19            | 0.046   | 0.445           |
| Mrpl32                    | NM_029271                 | ref Mus musculus mitochondrial ribosomal protein L32 (Mrpl32), nuclear gene encoding mitochondrial protein, mRNA [NM_029271]                            | -0.19            | 0.042   | 0.424           |
| lqsec1                    | NM_001134384              | ref Mus musculus IQ motif and Sec7 domain 1 (lqsec1), transcript variant 2, mRNA [NM_001134384]                                                         | -0.19            | 0.038   | 0.407           |
| chr13:58474388-58487288_R | chr13:58474388-58487288_R | lincRNA:chr13:58474388-58487288 reverse strand                                                                                                          | -0.19            | 0.045   | 0.440           |
| Katnb1                    | NM_028805                 | ref Mus musculus katanin p80 (WD40-containing) subunit B 1 (Katnb1), mRNA [NM_028805]                                                                   | -0.19            | 0.033   | 0.379           |
| Syng2                     | NM_009304                 | ref Mus musculus synaptogyrin 2 (Syng2), mRNA [NM_009304]                                                                                               | -0.19            | 0.024   | 0.326           |
| chr16:32309935-32328234_R | chr16:32309935-32328234_R | lincRNA:chr16:32309935-32328234 reverse strand                                                                                                          | -0.19            | 0.048   | 0.452           |
| Dap3                      | NM_022994                 | ref Mus musculus death associated protein 3 (Dap3), nuclear gene encoding mitochondrial protein, transcript variant 2, mRNA [NM_022994]                 | -0.19            | 0.040   | 0.416           |
| Ppid                      | NM_026352                 | ref Mus musculus peptidylprolyl isomerase D (cyclophilin D) (Ppid), mRNA [NM_026352]                                                                    | -0.19            | 0.040   | 0.413           |
| 2310008H09Rik             | NM_023197                 | ref Mus musculus RIKEN cDNA 2310008H09 gene (2310008H09Rik), transcript variant 1, mRNA [NM_023197]                                                     | -0.19            | 0.025   | 0.332           |
| Poldip2                   | NM_026389                 | ref Mus musculus polymerase (DNA-directed), delta interacting protein 2 (Poldip2), mRNA [NM_026389]                                                     | -0.19            | 0.043   | 0.428           |
| Mrpl27                    | NM_053161                 | ref Mus musculus mitochondrial ribosomal protein L27 (Mrpl27), nuclear gene encoding mitochondrial protein, mRNA [NM_053161]                            | -0.20            | 0.025   | 0.332           |
| Timm23                    | NM_016897                 | ref Mus musculus translocase of inner mitochondrial membrane 23 homolog (yeast) (Timm23), nuclear gene encoding mitochondrial protein, mRNA [NM_016897] | -0.20            | 0.033   | 0.376           |
| Tmod1                     | NM_021883                 | ref Mus musculus tropomodulin 1 (Tmod1), mRNA [NM_021883]                                                                                               | -0.20            | 0.035   | 0.388           |
| Amz2                      | NM_025275                 | ref Mus musculus archaelysin family metalloproteinase 2 (Amz2), mRNA [NM_025275]                                                                        | -0.20            | 0.040   | 0.414           |
| Rad17                     | NM_011233                 | ref Mus musculus RAD17 homolog (S. pombe) (Rad17), transcript variant 1, mRNA [NM_011233]                                                               | -0.20            | 0.036   | 0.392           |
| Tardbp                    | NM_001008546              | ref Mus musculus TAR DNA binding protein (Tardbp), transcript variant 4, mRNA [NM_001008546]                                                            | -0.20            | 0.037   | 0.400           |
| Obscn                     | NM_001171512              | ref Mus musculus obscurin, cytoskeletal calmodulin and titin-interacting RhoGEF (Obscn), transcript variant 1, mRNA [NM_001171512]                      | -0.20            | 0.021   | 0.304           |
| 1110012J17Rik             | NM_001114098              | ref Mus musculus RIKEN cDNA 1110012J17 gene (1110012J17Rik), transcript variant 1, mRNA [NM_001114098]                                                  | -0.20            | 0.039   | 0.408           |
| Pacrgl                    | NM_025755                 | ref Mus musculus PARK2 co-regulated-like (Pacrgl), mRNA [NM_025755]                                                                                     | -0.20            | 0.028   | 0.348           |
| Pgk1-rs7                  | XR_035357                 | ref PREDICTED: Mus musculus predicted gene, EG668435 (EG668435), misc RNA [XR_035357]                                                                   | -0.20            | 0.019   | 0.290           |
| Dcun1d5                   | NM_029775                 | ref Mus musculus DCN1, defective in cullin neddylation 1, domain containing 5 (S. cerevisiae) (Dcun1d5), mRNA [NM_029775]                               | -0.20            | 0.025   | 0.332           |

| Online Supplemental Table IV: Con-STZ Only |                            |                                                                                                                                                                |                  |         |                 |
|--------------------------------------------|----------------------------|----------------------------------------------------------------------------------------------------------------------------------------------------------------|------------------|---------|-----------------|
| Gene Symbol                                | RefSeq                     | Description                                                                                                                                                    | logFC<br>Con-STZ | P-value | Adj.<br>P-value |
| <b>Mto1</b>                                | NM_026658                  | ref Mus musculus mitochondrial translation optimization 1 homolog (S. cerevisiae) (Mto1), nuclear gene encoding mitochondrial protein, mRNA [NM_026658]        | -0.20            | 0.040   | 0.417           |
| <b>Prdx6</b>                               | NM_007453                  | ref Mus musculus peroxiredoxin 6 (Prdx6), mRNA [NM_007453]                                                                                                     | -0.20            | 0.038   | 0.404           |
| <b>Cox7b</b>                               | NM_025379                  | ref Mus musculus cytochrome c oxidase subunit VIIb (Cox7b), nuclear gene encoding mitochondrial protein, mRNA [NM_025379]                                      | -0.20            | 0.049   | 0.453           |
| <b>Psme2</b>                               | NM_011190                  | ref Mus musculus proteasome (prosome, macropain) 28 subunit, beta (Psme2), transcript variant 1, mRNA [NM_011190]                                              | -0.20            | 0.042   | 0.423           |
| <b>5730437N04Rik</b>                       | NM_027457                  | ref Mus musculus RIKEN cDNA 5730437N04 gene (5730437N04Rik), mRNA [NM_027457]                                                                                  | -0.20            | 0.040   | 0.413           |
| <b>Tmem110</b>                             | NM_028839                  | ref Mus musculus transmembrane protein 110 (Tmem110), mRNA [NM_028839]                                                                                         | -0.20            | 0.048   | 0.449           |
| <b>Fert2</b>                               | NM_001037997               | ref Mus musculus fer (fms/fps related) protein kinase, testis specific 2 (Fert2), transcript variant 1, mRNA [NM_001037997]                                    | -0.20            | 0.039   | 0.411           |
| <b>Fam125a</b>                             | NM_028617                  | ref Mus musculus family with sequence similarity 125, member A (Fam125a), mRNA [NM_028617]                                                                     | -0.20            | 0.033   | 0.380           |
| <b>Atxn1</b>                               | NM_009124                  | ref Mus musculus ataxin 1 (Atxn1), mRNA [NM_009124]                                                                                                            | -0.20            | 0.048   | 0.449           |
| <b>Zdhhc9</b>                              | NM_172465                  | ref Mus musculus zinc finger, DHHC domain containing 9 (Zdhhc9), mRNA [NM_172465]                                                                              | -0.20            | 0.028   | 0.352           |
| <b>Tmem53</b>                              | NM_026837                  | ref Mus musculus transmembrane protein 53 (Tmem53), mRNA [NM_026837]                                                                                           | -0.20            | 0.049   | 0.454           |
| <b>LOC100046838</b>                        | XM_001476461               | ref PREDICTED: Mus musculus hypothetical protein LOC100046838 (LOC100046838), mRNA [XM_001476461]                                                              | -0.20            | 0.025   | 0.330           |
| <b>Tmem14c</b>                             | NM_025387                  | ref Mus musculus transmembrane protein 14C (Tmem14c), mRNA [NM_025387]                                                                                         | -0.20            | 0.037   | 0.398           |
| <b>Dexi</b>                                | NM_021428                  | ref Mus musculus dexamethasone-induced transcript (Dexi), mRNA [NM_021428]                                                                                     | -0.20            | 0.037   | 0.400           |
| <b>Ttc35</b>                               | NM_025736                  | ref Mus musculus tetratricopeptide repeat domain 35 (Ttc35), mRNA [NM_025736]                                                                                  | -0.20            | 0.020   | 0.295           |
| <b>Mitf</b>                                | NM_001113198               | ref Mus musculus microphthalmia-associated transcription factor (Mitf), transcript variant 1, mRNA [NM_001113198]                                              | -0.20            | 0.040   | 0.416           |
| <b>Mrpl16</b>                              | NM_025606                  | ref Mus musculus mitochondrial ribosomal protein L16 (Mrpl16), nuclear gene encoding mitochondrial protein, mRNA [NM_025606]                                   | -0.20            | 0.022   | 0.314           |
| <b>ENSMUST00000107819</b>                  | ENSMUST00000107819         | ens glyoxylate reductase/hydroxypyruvate reductase Gene [Source:MGI (curated);Acc:MGI:1923488] [ENSMUST00000107819]                                            | -0.20            | 0.036   | 0.393           |
| <b>chr6:122741562-122743423_R</b>          | chr6:122741562-122743423_R | lincRNA:chr6:122741562-122743423 reverse strand                                                                                                                | -0.21            | 0.047   | 0.447           |
| <b>Clpp</b>                                | NM_017393                  | ref Mus musculus caseinolytic peptidase, ATP-dependent, proteolytic subunit homolog (E. coli) (Clpp), mRNA [NM_017393]                                         | -0.21            | 0.033   | 0.377           |
| <b>ENSMUST00000106471</b>                  | ENSMUST00000106471         | ens NADH dehydrogenase (ubiquinone) 1, alpha/beta subcomplex, 1 Gene [Source:MGI (curated);Acc:MGI:1917566] [ENSMUST00000106471]                               | -0.21            | 0.017   | 0.280           |
| <b>Gm5514</b>                              | XM_899874                  | ref PREDICTED: Mus musculus predicted gene, EG433229, transcript variant 7 (EG433229), mRNA [XM_899874]                                                        | -0.21            | 0.026   | 0.342           |
| <b>Atp5d</b>                               | NM_025313                  | ref Mus musculus ATP synthase, H+ transporting, mitochondrial F1 complex, delta subunit (Atp5d), nuclear gene encoding mitochondrial protein, mRNA [NM_025313] | -0.21            | 0.018   | 0.283           |
| <b>R3hcc1</b>                              | NM_001146012               | ref Mus musculus R3H domain and coiled-coil containing 1 (R3hcc1), mRNA [NM_001146012]                                                                         | -0.21            | 0.047   | 0.446           |

| Online Supplemental Table IV: Con-STZ Only |                           |                                                                                                                                                 |                  |         |                 |
|--------------------------------------------|---------------------------|-------------------------------------------------------------------------------------------------------------------------------------------------|------------------|---------|-----------------|
| Gene Symbol                                | RefSeq                    | Description                                                                                                                                     | logFC<br>Con-STZ | P-value | Adj.<br>P-value |
| 0610037P05Rik                              | NM_025345                 | ref Mus musculus RIKEN cDNA 0610037P05 gene (0610037P05Rik), mRNA [NM_025345]                                                                   | -0.21            | 0.035   | 0.387           |
| Arfgef1                                    | NM_001102430              | ref Mus musculus ADP-ribosylation factor guanine nucleotide-exchange factor 1(brefeldin A-inhibited) (Arfgef1), mRNA [NM_001102430]             | -0.21            | 0.025   | 0.330           |
| Pank2                                      | NM_153501                 | ref Mus musculus pantothenate kinase 2 (Hallervorden-Spatz syndrome) (Pank2), nuclear gene encoding mitochondrial protein, mRNA [NM_153501]     | -0.21            | 0.038   | 0.405           |
| Canx                                       | NM_007597                 | ref Mus musculus calnexin (Canx), transcript variant 1, mRNA [NM_007597]                                                                        | -0.21            | 0.025   | 0.330           |
| 2010001M09Rik                              | NM_027222                 | ref Mus musculus RIKEN cDNA 2010001M09 gene (2010001M09Rik), mRNA [NM_027222]                                                                   | -0.21            | 0.028   | 0.351           |
| Grb2                                       | NM_008163                 | ref Mus musculus growth factor receptor bound protein 2 (Grb2), mRNA [NM_008163]                                                                | -0.21            | 0.027   | 0.342           |
| Synpo2l                                    | NM_175132                 | ref Mus musculus synaptopodin 2-like (Synpo2l), mRNA [NM_175132]                                                                                | -0.21            | 0.036   | 0.392           |
| chr14:76237150-76237464_R                  | chr14:76237150-76237464_R | lincRNA:chr14:76237150-76237464 reverse strand                                                                                                  | -0.21            | 0.032   | 0.372           |
| Abhd11                                     | NM_145215                 | ref Mus musculus abhydrolase domain containing 11 (Abhd11), nuclear gene encoding mitochondrial protein, transcript variant 1, mRNA [NM_145215] | -0.21            | 0.045   | 0.437           |
| Polrmt                                     | NM_172551                 | ref Mus musculus polymerase (RNA) mitochondrial (DNA directed) (Polrmt), nuclear gene encoding mitochondrial protein, mRNA [NM_172551]          | -0.21            | 0.047   | 0.446           |
| Mettl14                                    | NM_201638                 | ref Mus musculus methyltransferase like 14 (Mettl14), mRNA [NM_201638]                                                                          | -0.21            | 0.049   | 0.455           |
| Ing4                                       | NM_133345                 | ref Mus musculus inhibitor of growth family, member 4 (Ing4), mRNA [NM_133345]                                                                  | -0.21            | 0.045   | 0.439           |
| Fert2                                      | NM_001037997              | ref Mus musculus fer (fms/fps related) protein kinase, testis specific 2 (Fert2), transcript variant 1, mRNA [NM_001037997]                     | -0.21            | 0.025   | 0.332           |
| Yipf4                                      | NM_026417                 | ref Mus musculus Yip1 domain family, member 4 (Yipf4), mRNA [NM_026417]                                                                         | -0.21            | 0.025   | 0.330           |
| Dand5                                      | NM_201227                 | ref Mus musculus DAN domain family, member 5 (Dand5), transcript variant 1, mRNA [NM_201227]                                                    | -0.21            | 0.031   | 0.367           |
| Gm13464                                    | XM_001472735              | ref PREDICTED: Mus musculus similar to Glyceraldehyde-3-phosphate dehydrogenase (GAPDH) (LOC100044628), mRNA [XM_001472735]                     | -0.21            | 0.045   | 0.438           |
| Bat2l                                      | NM_172661                 | ref Mus musculus HLA-B associated transcript 2-like (Bat2l), transcript variant 2, mRNA [NM_172661]                                             | -0.21            | 0.042   | 0.425           |
| Mrpl20                                     | NM_025570                 | ref Mus musculus mitochondrial ribosomal protein L20 (Mrpl20), nuclear gene encoding mitochondrial protein, mRNA [NM_025570]                    | -0.21            | 0.033   | 0.376           |
| Zfp318                                     | NM_021346                 | ref Mus musculus zinc finger protein 318 (Zfp318), transcript variant 2, mRNA [NM_021346]                                                       | -0.21            | 0.048   | 0.449           |
| Nacc2                                      | NM_001037098              | ref Mus musculus nucleus accumbens associated 2, BEN and BTB (POZ) domain containing (Nacc2), transcript variant 2, mRNA [NM_001037098]         | -0.21            | 0.036   | 0.392           |
| 2700029M09Rik                              | NM_028299                 | ref Mus musculus RIKEN cDNA 2700029M09 gene (2700029M09Rik), mRNA [NM_028299]                                                                   | -0.21            | 0.016   | 0.273           |
| Zfp512                                     | NM_172993                 | ref Mus musculus zinc finger protein 512 (Zfp512), mRNA [NM_172993]                                                                             | -0.21            | 0.043   | 0.427           |
| Med6                                       | NM_027213                 | ref Mus musculus mediator of RNA polymerase II transcription, subunit 6 homolog (yeast) (Med6), mRNA [NM_027213]                                | -0.21            | 0.028   | 0.348           |
| Gmpr                                       | NM_025508                 | ref Mus musculus guanosine monophosphate reductase (Gmpr), mRNA [NM_025508]                                                                     | -0.21            | 0.041   | 0.420           |
| Fastkd1                                    | NM_177244                 | ref Mus musculus FAST kinase domains 1 (Fastkd1), mRNA [NM_177244]                                                                              | -0.21            | 0.037   | 0.398           |
| Zfp276                                     | NM_020497                 | ref Mus musculus zinc finger protein (C2H2 type) 276 (Zfp276), mRNA [NM_020497]                                                                 | -0.21            | 0.050   | 0.457           |
| 2700089E24Rik                              | NM_001163445              | ref Mus musculus RIKEN cDNA 2700089E24 gene (2700089E24Rik), mRNA [NM_001163445]                                                                | -0.21            | 0.017   | 0.280           |

| Online Supplemental Table IV: Con-STZ Only |                            |                                                                                                                                                               |                  |         |                 |
|--------------------------------------------|----------------------------|---------------------------------------------------------------------------------------------------------------------------------------------------------------|------------------|---------|-----------------|
| Gene Symbol                                | RefSeq                     | Description                                                                                                                                                   | logFC<br>Con-STZ | P-value | Adj.<br>P-value |
| Gde1                                       | NM_019580                  | ref Mus musculus glycerophosphodiester phosphodiesterase 1 (Gde1), mRNA [NM_019580]                                                                           | -0.21            | 0.029   | 0.356           |
| Taf2                                       | NM_001081288               | ref Mus musculus TAF2 RNA polymerase II, TATA box binding protein (TBP)-associated factor (Taf2), mRNA [NM_001081288]                                         | -0.21            | 0.043   | 0.428           |
| Tmem116                                    | NM_001161627               | ref Mus musculus transmembrane protein 116 (Tmem116), transcript variant 1, mRNA [NM_001161627]                                                               | -0.21            | 0.048   | 0.451           |
| Asb18                                      | NM_139152                  | ref Mus musculus ankyrin repeat and SOCS box-containing 18 (Asb18), mRNA [NM_139152]                                                                          | -0.21            | 0.045   | 0.440           |
| Mrpl10                                     | NM_026154                  | ref Mus musculus mitochondrial ribosomal protein L10 (Mrpl10), nuclear gene encoding mitochondrial protein, mRNA [NM_026154]                                  | -0.21            | 0.042   | 0.426           |
| 4930471M23Rik                              | NM_175675                  | ref Mus musculus RIKEN cDNA 4930471M23 gene (4930471M23Rik), mRNA [NM_175675]                                                                                 | -0.21            | 0.047   | 0.446           |
| Ndufv3                                     | NM_030087                  | ref Mus musculus NADH dehydrogenase (ubiquinone) flavoprotein 3 (Ndufv3), nuclear gene encoding mitochondrial protein, transcript variant 1, mRNA [NM_030087] | -0.21            | 0.037   | 0.399           |
| Mlh1                                       | NM_026810                  | ref Mus musculus mutL homolog 1 (E. coli) (Mlh1), mRNA [NM_026810]                                                                                            | -0.21            | 0.035   | 0.388           |
| Uqcrc1                                     | NM_025407                  | ref Mus musculus ubiquinol-cytochrome c reductase core protein 1 (Uqcrc1), mRNA [NM_025407]                                                                   | -0.21            | 0.036   | 0.392           |
| Exosc4                                     | NM_175399                  | ref Mus musculus exosome component 4 (Exosc4), mRNA [NM_175399]                                                                                               | -0.21            | 0.018   | 0.286           |
| chr1:158903230-158984165_R                 | chr1:158903230-158984165_R | lincRNA:chr1:158903230-158984165 reverse strand                                                                                                               | -0.22            | 0.047   | 0.447           |
| Mrps23                                     | NM_024174                  | ref Mus musculus mitochondrial ribosomal protein S23 (Mrps23), nuclear gene encoding mitochondrial protein, mRNA [NM_024174]                                  | -0.22            | 0.027   | 0.347           |
| Osgin2                                     | NM_145950                  | ref Mus musculus oxidative stress induced growth inhibitor family member 2 (Osgin2), mRNA [NM_145950]                                                         | -0.22            | 0.031   | 0.368           |
| Tab3                                       | NM_025729                  | ref Mus musculus TGF-beta activated kinase 1/MAP3K7 binding protein 3 (Tab3), mRNA [NM_025729]                                                                | -0.22            | 0.032   | 0.372           |
| Atp1a2                                     | NM_178405                  | ref Mus musculus ATPase, Na+/K+ transporting, alpha 2 polypeptide (Atp1a2), mRNA [NM_178405]                                                                  | -0.22            | 0.044   | 0.432           |
| Ppapdc2                                    | NM_028922                  | ref Mus musculus phosphatidic acid phosphatase type 2 domain containing 2 (Ppapdc2), mRNA [NM_028922]                                                         | -0.22            | 0.026   | 0.340           |
| Isoc1                                      | NM_025478                  | ref Mus musculus isochorismatase domain containing 1 (Isoc1), mRNA [NM_025478]                                                                                | -0.22            | 0.018   | 0.282           |
| chr6:11994002-11997859_F                   | chr6:11994002-11997859_F   | lincRNA:chr6:11994002-11997859 forward strand                                                                                                                 | -0.22            | 0.040   | 0.416           |
| Fdx1                                       | NM_007996                  | ref Mus musculus ferredoxin 1 (Fdx1), nuclear gene encoding mitochondrial protein, mRNA [NM_007996]                                                           | -0.22            | 0.029   | 0.356           |
| ENSMUST00000089502                         | ENSMUST00000089502         | ens crystallin, lambda 1 Gene [Source:MGI Symbol;Acc:MGI:1915881] [ENSMUST00000089502]                                                                        | -0.22            | 0.031   | 0.367           |
| Gm6304                                     | XM_001474657               | ref PREDICTED: Mus musculus predicted gene, EG622268 (EG622268), mRNA [XM_001474657]                                                                          | -0.22            | 0.039   | 0.409           |
| chr10:81680941-81704964_F                  | chr10:81680941-81704964_F  | lincRNA:chr10:81680941-81704964 forward strand                                                                                                                | -0.22            | 0.029   | 0.359           |
| Ccdc45                                     | NM_177088                  | ref Mus musculus coiled-coil domain containing 45 (Ccdc45), transcript variant 1, mRNA [NM_177088]                                                            | -0.22            | 0.022   | 0.315           |
| Uqcrb                                      | NM_026219                  | ref Mus musculus ubiquinol-cytochrome c reductase binding protein (Uqcrb), nuclear gene encoding mitochondrial protein, mRNA [NM_026219]                      | -0.22            | 0.024   | 0.326           |
| Timm50                                     | NM_025616                  | ref Mus musculus translocase of inner mitochondrial membrane 50 homolog (yeast) (Timm50), nuclear gene encoding mitochondrial protein, mRNA [NM_025616]       | -0.22            | 0.026   | 0.339           |
| Gm9897                                     | NM_001042670               | ref Mus musculus predicted gene 9897 (Gm9897), nuclear gene encoding mitochondrial protein, mRNA [NM_001042670]                                               | -0.22            | 0.049   | 0.456           |
| Smpd4                                      | NM_029945                  | ref Mus musculus sphingomyelin phosphodiesterase 4 (Smpd4), transcript variant 1, mRNA [NM_029945]                                                            | -0.22            | 0.036   | 0.393           |



| Online Supplemental Table IV: Con-STZ Only |                            |                                                                                                                                                               |                  |         |                 |
|--------------------------------------------|----------------------------|---------------------------------------------------------------------------------------------------------------------------------------------------------------|------------------|---------|-----------------|
| Gene Symbol                                | RefSeq                     | Description                                                                                                                                                   | logFC<br>Con-STZ | P-value | Adj.<br>P-value |
| Prdx6                                      | NM_007453                  | ref Mus musculus peroxiredoxin 6 (Prdx6), mRNA [NM_007453]                                                                                                    | -0.22            | 0.029   | 0.354           |
| Abcc9                                      | NM_021041                  | ref Mus musculus ATP-binding cassette, sub-family C (CFTR/MRP), member 9 (Abcc9), transcript variant 2, mRNA [NM_021041]                                      | -0.22            | 0.030   | 0.365           |
| Pisd                                       | NM_177298                  | ref Mus musculus phosphatidylserine decarboxylase (Pisd), mRNA [NM_177298]                                                                                    | -0.22            | 0.031   | 0.368           |
| Ola1                                       | NM_025942                  | ref Mus musculus Obg-like ATPase 1 (Ola1), transcript variant 1, mRNA [NM_025942]                                                                             | -0.22            | 0.047   | 0.446           |
| Dpcd                                       | NM_172639                  | ref Mus musculus deleted in primary ciliary dyskinesia (Dpcd), mRNA [NM_172639]                                                                               | -0.22            | 0.019   | 0.291           |
| Cgrrf1                                     | NM_026832                  | ref Mus musculus cell growth regulator with ring finger domain 1 (Cgrrf1), mRNA [NM_026832]                                                                   | -0.22            | 0.041   | 0.418           |
| Gm7928                                     | XR_033855                  | ref PREDICTED: Mus musculus similar to PA28 beta subunit (LOC66098), misc RNA [XR_033855]                                                                     | -0.22            | 0.023   | 0.316           |
| Nudt22                                     | NM_026675                  | ref Mus musculus nudix (nucleoside diphosphate linked moiety X)-type motif 22 (Nudt22), mRNA [NM_026675]                                                      | -0.22            | 0.029   | 0.354           |
| Cenpv                                      | NM_028448                  | ref Mus musculus centromere protein V (Cenpv), mRNA [NM_028448]                                                                                               | -0.22            | 0.027   | 0.347           |
| Ndufv3                                     | NM_030087                  | ref Mus musculus NADH dehydrogenase (ubiquinone) flavoprotein 3 (Ndufv3), nuclear gene encoding mitochondrial protein, transcript variant 1, mRNA [NM_030087] | -0.22            | 0.022   | 0.315           |
| Pigv                                       | NM_178698                  | ref Mus musculus phosphatidylinositol glycan anchor biosynthesis, class V (Pigv), transcript variant 1, mRNA [NM_178698]                                      | -0.22            | 0.029   | 0.356           |
| Ubxn2b                                     | NM_026534                  | ref Mus musculus UBX domain protein 2B (Ubxn2b), mRNA [NM_026534]                                                                                             | -0.22            | 0.037   | 0.399           |
| C030006K11Rik                              | NM_176828                  | ref Mus musculus RIKEN cDNA C030006K11 gene (C030006K11Rik), transcript variant 2, mRNA [NM_176828]                                                           | -0.22            | 0.023   | 0.317           |
| Brp44                                      | NM_027430                  | ref Mus musculus brain protein 44 (Brp44), mRNA [NM_027430]                                                                                                   | -0.22            | 0.021   | 0.304           |
| Park2                                      | NM_016694                  | ref Mus musculus Parkinson disease (autosomal recessive, juvenile) 2, parkin (Park2), mRNA [NM_016694]                                                        | -0.22            | 0.025   | 0.332           |
| Stard3                                     | NM_021547                  | ref Mus musculus START domain containing 3 (Stard3), mRNA [NM_021547]                                                                                         | -0.22            | 0.036   | 0.392           |
| Hsd3b2                                     | ENSMUST00000107022         | ens hydroxy-delta-5-steroid dehydrogenase, 3 beta- and steroid delta-isomerase 2 Gene [Source:MGI (curated);Acc:MGI:96234] [ENSMUST00000107022]               | -0.22            | 0.042   | 0.423           |
| Magea6                                     | NM_020019                  | ref Mus musculus melanoma antigen, family A, 6 (Magea6), mRNA [NM_020019]                                                                                     | -0.22            | 0.046   | 0.443           |
| Il10rb                                     | NM_008349                  | ref Mus musculus interleukin 10 receptor, beta (Il10rb), mRNA [NM_008349]                                                                                     | -0.22            | 0.025   | 0.332           |
| Zmiz2                                      | NM_028601                  | ref Mus musculus zinc finger, MIZ-type containing 2 (Zmiz2), transcript variant 1, mRNA [NM_028601]                                                           | -0.22            | 0.016   | 0.267           |
| Gm6746                                     | XM_894970                  | ref PREDICTED: Mus musculus predicted gene, EG627342 (EG627342), mRNA [XM_894970]                                                                             | -0.22            | 0.030   | 0.365           |
| E130309D02Rik                              | NM_172726                  | ref Mus musculus RIKEN cDNA E130309D02 gene (E130309D02Rik), mRNA [NM_172726]                                                                                 | -0.22            | 0.032   | 0.374           |
| chr2:176784125-177183100_F                 | chr2:176784125-177183100_F | lincRNA:chr2:176784125-177183100 forward strand                                                                                                               | -0.22            | 0.047   | 0.446           |
| Nup37                                      | NM_028334                  | ref Mus musculus nucleoporin 37 (Nup37), transcript variant 1, mRNA [NM_028334]                                                                               | -0.22            | 0.049   | 0.456           |
| Metap1                                     | NM_175224                  | ref Mus musculus methionyl aminopeptidase 1 (Metap1), mRNA [NM_175224]                                                                                        | -0.22            | 0.018   | 0.282           |
| Tulp3                                      | NM_011657                  | ref Mus musculus tubby-like protein 3 (Tulp3), mRNA [NM_011657]                                                                                               | -0.22            | 0.021   | 0.308           |
| Coq6                                       | NM_172582                  | ref Mus musculus coenzyme Q6 homolog (yeast) (Coq6), nuclear gene encoding mitochondrial protein, mRNA [NM_172582]                                            | -0.22            | 0.027   | 0.347           |
| Ola1                                       | NM_025942                  | ref Mus musculus Obg-like ATPase 1 (Ola1), transcript variant 1, mRNA [NM_025942]                                                                             | -0.22            | 0.047   | 0.447           |

Online Supplemental Table IV: Con-STZ Only

| Gene Symbol                      | RefSeq                    | Description                                                                                                                           | logFC<br>Con-STZ | P-value | Adj.<br>P-value |
|----------------------------------|---------------------------|---------------------------------------------------------------------------------------------------------------------------------------|------------------|---------|-----------------|
| <b>Cbwd1</b>                     | NM_146097                 | ref Mus musculus COBW domain containing 1 (Cbwd1), transcript variant 1, mRNA [NM_146097]                                             | -0.22            | 0.044   | 0.435           |
| <b>Nudt3</b>                     | NM_019837                 | ref Mus musculus nudix (nucleotide diphosphate linked moiety X)-type motif 3 (Nudt3), mRNA [NM_019837]                                | -0.22            | 0.022   | 0.314           |
| <b>Pomt1</b>                     | NM_145145                 | ref Mus musculus protein-O-mannosyltransferase 1 (Pomt1), mRNA [NM_145145]                                                            | -0.22            | 0.017   | 0.278           |
| <b>chr17:44503516-44504852_R</b> | chr17:44503516-44504852_R | lincRNA:chr17:44503516-44504852 reverse strand                                                                                        | -0.22            | 0.046   | 0.444           |
| <b>4933424B01Rik</b>             | NM_138757                 | ref Mus musculus RIKEN cDNA 4933424B01 gene (4933424B01Rik), mRNA [NM_138757]                                                         | -0.22            | 0.029   | 0.357           |
| <b>ENSMUST00000051853</b>        | ENSMUST00000051853        | ens transducin-like enhancer of split 2, homolog of Drosophila E(spl) Gene [Source:MGI (curated);Acc:MGI:104635] [ENSMUST00000051853] | -0.22            | 0.043   | 0.428           |
| <b>Mrps11</b>                    | NM_026498                 | ref Mus musculus mitochondrial ribosomal protein S11 (Mrps11), nuclear gene encoding mitochondrial protein, mRNA [NM_026498]          | -0.22            | 0.008   | 0.190           |
| <b>Camk1</b>                     | NM_133926                 | ref Mus musculus calcium/calmodulin-dependent protein kinase I (Camk1), mRNA [NM_133926]                                              | -0.22            | 0.031   | 0.370           |
| <b>1700021F05Rik</b>             | NM_026411                 | ref Mus musculus RIKEN cDNA 1700021F05 gene (1700021F05Rik), mRNA [NM_026411]                                                         | -0.22            | 0.032   | 0.374           |
| <b>Cops3</b>                     | NM_011991                 | ref Mus musculus COP9 (constitutive photomorphogenic) homolog, subunit 3 (Arabidopsis thaliana) (Cops3), mRNA [NM_011991]             | -0.23            | 0.014   | 0.253           |
| <b>Stard10</b>                   | NM_019990                 | ref Mus musculus START domain containing 10 (Stard10), mRNA [NM_019990]                                                               | -0.23            | 0.040   | 0.417           |
| <b>Map3k1</b>                    | NM_011945                 | ref Mus musculus mitogen-activated protein kinase kinase kinase 1 (Map3k1), mRNA [NM_011945]                                          | -0.23            | 0.049   | 0.456           |
| <b>Mtg1</b>                      | NM_199301                 | ref Mus musculus mitochondrial GTPase 1 homolog (S. cerevisiae) (Mtg1), nuclear gene encoding mitochondrial protein, mRNA [NM_199301] | -0.23            | 0.025   | 0.330           |
| <b>Itpr2</b>                     | NM_019923                 | ref Mus musculus inositol 1,4,5-triphosphate receptor 2 (Itpr2), transcript variant 1, mRNA [NM_019923]                               | -0.23            | 0.026   | 0.339           |
| <b>Mrpl10</b>                    | NM_026154                 | ref Mus musculus mitochondrial ribosomal protein L10 (Mrpl10), nuclear gene encoding mitochondrial protein, mRNA [NM_026154]          | -0.23            | 0.022   | 0.314           |
| <b>Nutf2</b>                     | NM_026532                 | ref Mus musculus nuclear transport factor 2 (Nutf2), mRNA [NM_026532]                                                                 | -0.23            | 0.035   | 0.388           |
| <b>Gm4941</b>                    | XM_139339                 | ref PREDICTED: Mus musculus predicted gene, EG239341 (EG239341), mRNA [XM_139339]                                                     | -0.23            | 0.020   | 0.295           |
| <b>Psme1</b>                     | NM_011189                 | ref Mus musculus proteasome (prosome, macropain) 28 subunit, alpha (Psme1), mRNA [NM_011189]                                          | -0.23            | 0.013   | 0.247           |
| <b>Rpap1</b>                     | NM_177294                 | ref Mus musculus RNA polymerase II associated protein 1 (Rpap1), transcript variant 1, mRNA [NM_177294]                               | -0.23            | 0.009   | 0.204           |
| <b>Fundc1</b>                    | NM_028058                 | ref Mus musculus FUN14 domain containing 1 (Fundc1), mRNA [NM_028058]                                                                 | -0.23            | 0.025   | 0.332           |
| <b>Sphkap</b>                    | NM_172430                 | ref Mus musculus SPHK1 interactor, AKAP domain containing (Sphkap), mRNA [NM_172430]                                                  | -0.23            | 0.039   | 0.408           |
| <b>Rel1</b>                      | NM_145923                 | ref Mus musculus RELT-like 1 (Rel1), mRNA [NM_145923]                                                                                 | -0.23            | 0.024   | 0.327           |
| <b>Nfix</b>                      | NM_010906                 | ref Mus musculus nuclear factor I/X (Nfix), transcript variant 2, mRNA [NM_010906]                                                    | -0.23            | 0.019   | 0.292           |
| <b>Nck2</b>                      | NM_010879                 | ref Mus musculus non-catalytic region of tyrosine kinase adaptor protein 2 (Nck2), mRNA [NM_010879]                                   | -0.23            | 0.031   | 0.369           |
| <b>Tmx1</b>                      | NM_028339                 | ref Mus musculus thioredoxin-related transmembrane protein 1 (Tmx1), mRNA [NM_028339]                                                 | -0.23            | 0.017   | 0.278           |
| <b>ENSMUST00000119783</b>        | ENSMUST00000119783        | ens GATA zinc finger domain containing 1 Gene [Source:MGI (curated);Acc:MGI:1914460] [ENSMUST00000119783]                             | -0.23            | 0.040   | 0.414           |
| <b>LOC436420</b>                 | XM_001479292              | ref PREDICTED: Mus musculus similar to Glyceraldehyde-3-phosphate dehydrogenase (GAPDH) (LOC436420), mRNA [XM_001479292]              | -0.23            | 0.025   | 0.332           |

Online Supplemental Table IV: Con-STZ Only

| Gene Symbol               | RefSeq                    | Description                                                                                                                                             | logFC<br>Con-STZ | P-value | Adj.<br>P-value |
|---------------------------|---------------------------|---------------------------------------------------------------------------------------------------------------------------------------------------------|------------------|---------|-----------------|
| Timm23                    | NM_016897                 | ref Mus musculus translocase of inner mitochondrial membrane 23 homolog (yeast) (Timm23), nuclear gene encoding mitochondrial protein, mRNA [NM_016897] | -0.23            | 0.036   | 0.391           |
| Urod                      | NM_009478                 | ref Mus musculus uroporphyrinogen decarboxylase (Urod), mRNA [NM_009478]                                                                                | -0.23            | 0.021   | 0.302           |
| Rxrg                      | NM_009107                 | ref Mus musculus retinoid X receptor gamma (Rxrg), transcript variant 1, mRNA [NM_009107]                                                               | -0.23            | 0.035   | 0.391           |
| Chmp4c                    | NM_025519                 | ref Mus musculus chromatin modifying protein 4C (Chmp4c), mRNA [NM_025519]                                                                              | -0.23            | 0.027   | 0.344           |
| Neurl2                    | NM_001082974              | ref Mus musculus neuralized-like 2 (Drosophila) (Neurl2), mRNA [NM_001082974]                                                                           | -0.23            | 0.023   | 0.320           |
| Gucy2e                    | NM_008192                 | ref Mus musculus guanylate cyclase 2e (Gucy2e), mRNA [NM_008192]                                                                                        | -0.23            | 0.045   | 0.441           |
| Ints8                     | NM_178112                 | ref Mus musculus integrator complex subunit 8 (Ints8), transcript variant 2, mRNA [NM_178112]                                                           | -0.23            | 0.039   | 0.412           |
| Cdnf                      | NM_177647                 | ref Mus musculus cerebral dopamine neurotrophic factor (Cdnf), mRNA [NM_177647]                                                                         | -0.23            | 0.031   | 0.370           |
| Mrpl22                    | NM_175001                 | ref Mus musculus mitochondrial ribosomal protein L22 (Mrpl22), nuclear gene encoding mitochondrial protein, mRNA [NM_175001]                            | -0.23            | 0.010   | 0.212           |
| Tmem101                   | NM_029649                 | ref Mus musculus transmembrane protein 101 (Tmem101), mRNA [NM_029649]                                                                                  | -0.23            | 0.043   | 0.430           |
| Timm13                    | NM_013895                 | ref Mus musculus translocase of inner mitochondrial membrane 13 homolog (yeast) (Timm13), nuclear gene encoding mitochondrial protein, mRNA [NM_013895] | -0.23            | 0.037   | 0.396           |
| Tek                       | NM_013690                 | ref Mus musculus endothelial-specific receptor tyrosine kinase (Tek), mRNA [NM_013690]                                                                  | -0.23            | 0.025   | 0.331           |
| Tmem192                   | NM_028427                 | ref Mus musculus transmembrane protein 192 (Tmem192), transcript variant 1, mRNA [NM_028427]                                                            | -0.23            | 0.036   | 0.395           |
| chr17:13806767-13824342_R | chr17:13806767-13824342_R | lincRNA:chr17:13806767-13824342 reverse strand                                                                                                          | -0.23            | 0.016   | 0.268           |
| Csnk2a1                   | NM_007788                 | ref Mus musculus casein kinase 2, alpha 1 polypeptide (Csnk2a1), mRNA [NM_007788]                                                                       | -0.23            | 0.009   | 0.202           |
| Capza1                    | NM_009797                 | ref Mus musculus capping protein (actin filament) muscle Z-line, alpha 1 (Capza1), mRNA [NM_009797]                                                     | -0.23            | 0.023   | 0.318           |
| chr3:19179899-19216399_F  | chr3:19179899-19216399_F  | lincRNA:chr3:19179899-19216399 forward strand                                                                                                           | -0.23            | 0.016   | 0.269           |
| Urm1                      | NM_026615                 | ref Mus musculus ubiquitin related modifier 1 homolog (S. cerevisiae) (Urm1), mRNA [NM_026615]                                                          | -0.23            | 0.033   | 0.379           |
| Atp6v1d                   | NM_023721                 | ref Mus musculus ATPase, H+ transporting, lysosomal V1 subunit D (Atp6v1d), mRNA [NM_023721]                                                            | -0.23            | 0.013   | 0.248           |
| Prdx6                     | NM_007453                 | ref Mus musculus peroxiredoxin 6 (Prdx6), mRNA [NM_007453]                                                                                              | -0.23            | 0.021   | 0.302           |
| Glr3                      | NM_023140                 | ref Mus musculus glutaredoxin 3 (Glr3), mRNA [NM_023140]                                                                                                | -0.23            | 0.007   | 0.176           |
| Apip                      | NM_019735                 | ref Mus musculus APAF1 interacting protein (Apip), mRNA [NM_019735]                                                                                     | -0.23            | 0.030   | 0.360           |
| Aqr                       | NM_009702                 | ref Mus musculus aquarius (Aqr), mRNA [NM_009702]                                                                                                       | -0.23            | 0.025   | 0.331           |
| Asnsd1                    | NM_133728                 | ref Mus musculus asparagine synthetase domain containing 1 (Asnsd1), mRNA [NM_133728]                                                                   | -0.23            | 0.020   | 0.298           |
| Zcchc4                    | NM_030185                 | ref Mus musculus zinc finger, CCHC domain containing 4 (Zcchc4), mRNA [NM_030185]                                                                       | -0.23            | 0.043   | 0.428           |
| Ssbp1                     | NM_028358                 | ref Mus musculus single-stranded DNA binding protein 1 (Ssbp1), nuclear gene encoding mitochondrial protein, transcript variant 2, mRNA [NM_028358]     | -0.23            | 0.010   | 0.207           |
| Tmem70                    | NM_026392                 | ref Mus musculus transmembrane protein 70 (Tmem70), nuclear gene encoding mitochondrial protein, transcript variant 2, mRNA [NM_026392]                 | -0.23            | 0.020   | 0.295           |
| Ndufa6                    | NM_025987                 | ref Mus musculus NADH dehydrogenase (ubiquinone) 1 alpha subcomplex, 6 (B14) (Ndufa6), nuclear gene encoding mitochondrial protein, mRNA [NM_025987]    | -0.24            | 0.018   | 0.280           |

Online Supplemental Table IV: Con-STZ Only

| Gene Symbol                | RefSeq                     | Description                                                                                                                                           | logFC<br>Con-STZ | P-value | Adj.<br>P-value |
|----------------------------|----------------------------|-------------------------------------------------------------------------------------------------------------------------------------------------------|------------------|---------|-----------------|
| chr14:78214602-78226287_R  | chr14:78214602-78226287_R  | lincRNA:chr14:78214602-78226287 reverse strand                                                                                                        | -0.24            | 0.015   | 0.259           |
| ENSMUST00000051330         | ENSMUST00000051330         | ens RIKEN cDNA D830039M14 gene Gene [Source:MGI Symbol;Acc:MGI:2445111] [ENSMUST00000051330]                                                          | -0.24            | 0.041   | 0.418           |
| Chchd5                     | NM_025395                  | ref Mus musculus coiled-coil-helix-coiled-coil-helix domain containing 5 (Chchd5), mRNA [NM_025395]                                                   | -0.24            | 0.016   | 0.271           |
| Cenpl                      | NM_001159930               | ref Mus musculus centromere protein L (Cenpl), transcript variant 1, mRNA [NM_001159930]                                                              | -0.24            | 0.045   | 0.437           |
| Sirt4                      | NM_001167691               | ref Mus musculus sirtuin 4 (silent mating type information regulation 2 homolog) 4 (S. cerevisiae) (Sirt4), transcript variant 1, mRNA [NM_001167691] | -0.24            | 0.012   | 0.233           |
| chr1:169026196-169032664_F | chr1:169026196-169032664_F | lincRNA:chr1:169026196-169032664 forward strand                                                                                                       | -0.24            | 0.043   | 0.428           |
| Sorl1                      | NM_011436                  | ref Mus musculus sortilin-related receptor, LDLR class A repeats-containing (Sorl1), mRNA [NM_011436]                                                 | -0.24            | 0.024   | 0.329           |
| 2310079N02Rik              | NM_025636                  | ref Mus musculus RIKEN cDNA 2310079N02 gene (2310079N02Rik), mRNA [NM_025636]                                                                         | -0.24            | 0.023   | 0.321           |
| Mrpl4                      | NM_023167                  | ref Mus musculus mitochondrial ribosomal protein L4 (Mrpl4), nuclear gene encoding mitochondrial protein, mRNA [NM_023167]                            | -0.24            | 0.026   | 0.340           |
| Smg5                       | NM_178246                  | ref Mus musculus Smg-5 homolog, nonsense mediated mRNA decay factor (C. elegans) (Smg5), mRNA [NM_178246]                                             | -0.24            | 0.022   | 0.314           |
| Ppp1r7                     | NM_023200                  | ref Mus musculus protein phosphatase 1, regulatory (inhibitor) subunit 7 (Ppp1r7), mRNA [NM_023200]                                                   | -0.24            | 0.033   | 0.376           |
| ENSMUST00000059428         | ENSMUST00000059428         | ens predicted gene 447 Gene [Source:MGI Symbol;Acc:MGI:2685293] [ENSMUST00000059428]                                                                  | -0.24            | 0.033   | 0.377           |
| Tsc22d1                    | NM_009366                  | ref Mus musculus TSC22 domain family, member 1 (Tsc22d1), transcript variant 2, mRNA [NM_009366]                                                      | -0.24            | 0.025   | 0.332           |
| Gm3544                     | XR_031625                  | ref PREDICTED: Mus musculus similar to mitochondrial ribosomal protein S36 (LOC100045285), misc RNA [XR_031625]                                       | -0.24            | 0.045   | 0.441           |
| Ppp2r3c                    | NM_021529                  | ref Mus musculus protein phosphatase 2, regulatory subunit B", gamma (Ppp2r3c), mRNA [NM_021529]                                                      | -0.24            | 0.015   | 0.260           |
| chr16:93121505-93142255_R  | chr16:93121505-93142255_R  | lincRNA:chr16:93121505-93142255 reverse strand                                                                                                        | -0.24            | 0.021   | 0.305           |
| Dld                        | NM_007861                  | ref Mus musculus dihydrolipoamide dehydrogenase (Dld), mRNA [NM_007861]                                                                               | -0.24            | 0.031   | 0.369           |
| Taf4a                      | NM_001081092               | ref Mus musculus TAF4A RNA polymerase II, TATA box binding protein (TBP)-associated factor (Taf4a), mRNA [NM_001081092]                               | -0.24            | 0.034   | 0.380           |
| Peo1                       | NM_153796                  | ref Mus musculus progressive external ophthalmoplegia 1 (human) (Peo1), mRNA [NM_153796]                                                              | -0.24            | 0.017   | 0.278           |
| Ppm1l                      | NM_178726                  | ref Mus musculus protein phosphatase 1 (formerly 2C)-like (Ppm1l), mRNA [NM_178726]                                                                   | -0.24            | 0.033   | 0.378           |
| 4632415K11Rik              | NM_028883                  | ref Mus musculus RIKEN cDNA 4632415K11 gene (4632415K11Rik), mRNA [NM_028883]                                                                         | -0.24            | 0.017   | 0.278           |
| Mars2                      | NM_175439                  | ref Mus musculus methionine-tRNA synthetase 2 (mitochondrial) (Mars2), nuclear gene encoding mitochondrial protein, mRNA [NM_175439]                  | -0.24            | 0.013   | 0.247           |
| Tmem55a                    | NM_028264                  | ref Mus musculus transmembrane protein 55A (Tmem55a), mRNA [NM_028264]                                                                                | -0.24            | 0.021   | 0.305           |
| Lap3                       | NM_024434                  | ref Mus musculus leucine aminopeptidase 3 (Lap3), mRNA [NM_024434]                                                                                    | -0.24            | 0.005   | 0.150           |
| Eif1b                      | NM_026892                  | ref Mus musculus eukaryotic translation initiation factor 1B (Eif1b), mRNA [NM_026892]                                                                | -0.24            | 0.015   | 0.262           |
| Sdhb                       | NM_023374                  | ref Mus musculus succinate dehydrogenase complex, subunit B, iron sulfur (lp) (Sdhb), nuclear gene encoding mitochondrial protein, mRNA [NM_023374]   | -0.24            | 0.008   | 0.184           |
| Cnst                       | NM_146105                  | ref Mus musculus consorin, connexin sorting protein (Cnst), mRNA [NM_146105]                                                                          | -0.24            | 0.041   | 0.419           |

| Online Supplemental Table IV: Con-STZ Only |                            |                                                                                                                                           |                  |         |                 |
|--------------------------------------------|----------------------------|-------------------------------------------------------------------------------------------------------------------------------------------|------------------|---------|-----------------|
| Gene Symbol                                | RefSeq                     | Description                                                                                                                               | logFC<br>Con-STZ | P-value | Adj.<br>P-value |
| <b>Clcn3</b>                               | NM_173874                  | ref Mus musculus chloride channel 3 (Clcn3), transcript variant e, mRNA [NM_173874]                                                       | -0.24            | 0.017   | 0.279           |
| <b>Wnk1</b>                                | NM_198703                  | ref Mus musculus WNK lysine deficient protein kinase 1 (Wnk1), transcript variant 1, mRNA [NM_198703]                                     | -0.24            | 0.031   | 0.367           |
| <b>chr18:84297418-84297745_R</b>           | chr18:84297418-84297745_R  | lincRNA:chr18:84297418-84297745 reverse strand                                                                                            | -0.24            | 0.045   | 0.438           |
| <b>ENSMUST00000103568</b>                  | ENSMUST00000103568         | ens L1 repeat, Gf subfamily, member251 Other Genome Feature [Source:MGI Symbol;Acc:MGI:2178813] [ENSMUST00000103568]                      | -0.24            | 0.030   | 0.365           |
| <b>Bphl</b>                                | NM_026512                  | ref Mus musculus biphenyl hydrolase-like (serine hydrolase, breast epithelial mucin-associated antigen) (Bphl), mRNA [NM_026512]          | -0.24            | 0.021   | 0.305           |
| <b>1110001A16Rik</b>                       | NM_001177403               | ref Mus musculus RIKEN cDNA 1110001A16 gene (1110001A16Rik), transcript variant 1, mRNA [NM_001177403]                                    | -0.24            | 0.018   | 0.286           |
| <b>Mcts2</b>                               | NM_025543                  | ref Mus musculus malignant T cell amplified sequence 2 (Mcts2), mRNA [NM_025543]                                                          | -0.24            | 0.029   | 0.359           |
| <b>ENSMUST00000054666</b>                  | ENSMUST00000054666         | ens cold inducible RNA binding protein Gene [Source:MGI (curated);Acc:MGI:893588] [ENSMUST00000054666]                                    | -0.24            | 0.039   | 0.408           |
| <b>Gm2308</b>                              | XR_030800                  | ref PREDICTED: Mus musculus similar to Glyceraldehyde-3-phosphate dehydrogenase (GAPDH) (LOC100039556), misc RNA [XR_030800]              | -0.24            | 0.012   | 0.239           |
| <b>Stat1</b>                               | NM_009283                  | ref Mus musculus signal transducer and activator of transcription 1 (Stat1), mRNA [NM_009283]                                             | -0.24            | 0.037   | 0.399           |
| <b>chr13:58474388-58487288_R</b>           | chr13:58474388-58487288_R  | lincRNA:chr13:58474388-58487288 reverse strand                                                                                            | -0.24            | 0.011   | 0.224           |
| <b>Bphl</b>                                | NM_026512                  | ref Mus musculus biphenyl hydrolase-like (serine hydrolase, breast epithelial mucin-associated antigen) (Bphl), mRNA [NM_026512]          | -0.24            | 0.022   | 0.312           |
| <b>Tmem141</b>                             | NM_001040130               | ref Mus musculus transmembrane protein 141 (Tmem141), transcript variant 1, mRNA [NM_001040130]                                           | -0.24            | 0.038   | 0.402           |
| <b>Tsc22d1</b>                             | NM_207652                  | ref Mus musculus TSC22 domain family, member 1 (Tsc22d1), transcript variant 1, mRNA [NM_207652]                                          | -0.24            | 0.026   | 0.341           |
| <b>chr16:43623581-43642715_R</b>           | chr16:43623581-43642715_R  | lincRNA:chr16:43623581-43642715 reverse strand                                                                                            | -0.24            | 0.033   | 0.376           |
| <b>Mcat</b>                                | NM_001030014               | ref Mus musculus malonyl CoA:ACP acyltransferase (mitochondrial) (Mcat), nuclear gene encoding mitochondrial protein, mRNA [NM_001030014] | -0.24            | 0.012   | 0.236           |
| <b>Kcnk3</b>                               | NM_010608                  | ref Mus musculus potassium channel, subfamily K, member 3 (Kcnk3), mRNA [NM_010608]                                                       | -0.24            | 0.008   | 0.192           |
| <b>Bbs5</b>                                | NM_028284                  | ref Mus musculus Bardet-Biedl syndrome 5 (human) (Bbs5), mRNA [NM_028284]                                                                 | -0.24            | 0.009   | 0.200           |
| <b>Apoo</b>                                | NM_026673                  | ref Mus musculus apolipoprotein O (Apoo), mRNA [NM_026673]                                                                                | -0.25            | 0.018   | 0.281           |
| <b>chr8:122945743-122946192_F</b>          | chr8:122945743-122946192_F | lincRNA:chr8:122945743-122946192 forward strand                                                                                           | -0.25            | 0.039   | 0.412           |
| <b>Nit2</b>                                | NM_023175                  | ref Mus musculus nitrilase family, member 2 (Nit2), mRNA [NM_023175]                                                                      | -0.25            | 0.027   | 0.345           |
| <b>Tmprss3</b>                             | NM_001163776               | ref Mus musculus transmembrane protease, serine 3 (Tmprss3), transcript variant 1, mRNA [NM_001163776]                                    | -0.25            | 0.025   | 0.332           |
| <b>Gm11783</b>                             | XR_030520                  | ref PREDICTED: Mus musculus similar to COX11 homolog, cytochrome c oxidase assembly protein (yeast) (LOC100039044), misc RNA [XR_030520]  | -0.25            | 0.049   | 0.455           |
| <b>ENSMUST00000110618</b>                  | ENSMUST00000110618         | ens 5-methyltetrahydrofolate-homocysteine methyltransferase Gene [Source:MGI Symbol;Acc:MGI:894292] [ENSMUST00000110618]                  | -0.25            | 0.024   | 0.326           |
| <b>Arfrp1</b>                              | NM_001165991               | ref Mus musculus ADP-ribosylation factor related protein 1 (Arfrp1), transcript variant 1, mRNA [NM_001165991]                            | -0.25            | 0.013   | 0.239           |
| <b>Cox7a1</b>                              | NM_009944                  | ref Mus musculus cytochrome c oxidase, subunit VIIa 1 (Cox7a1), nuclear gene encoding mitochondrial protein, mRNA [NM_009944]             | -0.25            | 0.016   | 0.274           |

Online Supplemental Table IV: Con-STZ Only

| Gene Symbol             | RefSeq                  | Description                                                                                                                                     | logFC<br>Con-<br>STZ | P-value | Adj.<br>P-value |
|-------------------------|-------------------------|-------------------------------------------------------------------------------------------------------------------------------------------------|----------------------|---------|-----------------|
| Npb                     | NM_153288               | ref Mus musculus neuropeptide B (Npb), mRNA [NM_153288]                                                                                         | -0.25                | 0.048   | 0.451           |
| Gtf3c6                  | NM_026113               | ref Mus musculus general transcription factor IIIC, polypeptide 6, alpha (Gtf3c6), mRNA [NM_026113]                                             | -0.25                | 0.049   | 0.456           |
| Mrps23                  | NM_024174               | ref Mus musculus mitochondrial ribosomal protein S23 (Mrps23), nuclear gene encoding mitochondrial protein, mRNA [NM_024174]                    | -0.25                | 0.019   | 0.291           |
| D10Jhu81e               | NM_138601               | ref Mus musculus DNA segment, Chr 10, Johns Hopkins University 81 expressed (D10Jhu81e), mRNA [NM_138601]                                       | -0.25                | 0.014   | 0.257           |
| Dnaja2                  | NM_019794               | ref Mus musculus DnaJ (Hsp40) homolog, subfamily A, member 2 (Dnaja2), mRNA [NM_019794]                                                         | -0.25                | 0.031   | 0.368           |
| Gm6705                  | XR_031767               | ref PREDICTED: Mus musculus similar to Lysosomal-associated protein transmembrane 4B (LOC626785), misc RNA [XR_031767]                          | -0.25                | 0.029   | 0.353           |
| Blvra                   | NM_026678               | ref Mus musculus biliverdin reductase A (Blvra), mRNA [NM_026678]                                                                               | -0.25                | 0.017   | 0.276           |
| Stau2                   | NM_025303               | ref Mus musculus staufer (RNA binding protein) homolog 2 (Drosophila) (Stau2), transcript variant 3, mRNA [NM_025303]                           | -0.25                | 0.019   | 0.290           |
| Polr3k                  | NM_025901               | ref Mus musculus polymerase (RNA) III (DNA directed) polypeptide K (Polr3k), mRNA [NM_025901]                                                   | -0.25                | 0.042   | 0.422           |
| Gm4116                  | XR_030557               | ref PREDICTED: Mus musculus similar to synaptojanin 2 binding protein (LOC100044401), misc RNA [XR_030557]                                      | -0.25                | 0.012   | 0.233           |
| Gm11945                 | XM_001473763            | ref PREDICTED: Mus musculus similar to 39S ribosomal protein L30, mitochondrial precursor (L30mt) (MRP-L30) (LOC100044791), mRNA [XM_001473763] | -0.25                | 0.030   | 0.361           |
| ENSMUST00000099807      | ENSMUST00000099807      | ens peroxiredoxin 5 Gene [Source:MGI (curated);Acc:MGI:1859821] [ENSMUST00000099807]                                                            | -0.25                | 0.032   | 0.374           |
| Aph1a                   | NM_146104               | ref Mus musculus anterior pharynx defective 1a homolog (C. elegans) (Aph1a), transcript variant 1, mRNA [NM_146104]                             | -0.25                | 0.014   | 0.251           |
| chr19:4996544-4997119_R | chr19:4996544-4997119_R | lincRNA:chr19:4996544-4997119 reverse strand                                                                                                    | -0.25                | 0.032   | 0.372           |
| ENSMUST00000112050      | ENSMUST00000112050      | ens secernin 3 Gene [Source:MGI (curated);Acc:MGI:1921866] [ENSMUST00000112050]                                                                 | -0.25                | 0.014   | 0.250           |
| Commd1                  | NM_144514               | ref Mus musculus COMM domain containing 1 (Commd1), mRNA [NM_144514]                                                                            | -0.25                | 0.009   | 0.200           |
| Gm10399                 | ENSMUST00000100834      | ens Putative uncharacterized protein Fragment [Source:UniProtKB/TrEMBL;Acc:Q3US04] [ENSMUST00000100834]                                         | -0.25                | 0.045   | 0.439           |
| Gm7843                  | XR_001798               | ref PREDICTED: Mus musculus predicted gene, EG665892 (EG665892), misc RNA [XR_001798]                                                           | -0.25                | 0.010   | 0.207           |
| Intu                    | NM_175515               | ref Mus musculus intumed planar cell polarity effector homolog (Drosophila) (Intu), mRNA [NM_175515]                                            | -0.25                | 0.009   | 0.196           |
| BC025920                | NR_030677               | ref Mus musculus cDNA sequence BC025920 (BC025920), non-coding RNA [NR_030677]                                                                  | -0.25                | 0.032   | 0.373           |
| ENSMUST00000032967      | ENSMUST00000032967      | ens lipoyl(octanoyl) transferase 2 (putative) Gene [Source:MGI (curated);Acc:MGI:1914414] [ENSMUST00000032967]                                  | -0.25                | 0.020   | 0.294           |
| Smug1                   | NM_027885               | ref Mus musculus single-strand selective monofunctional uracil DNA glycosylase (Smug1), mRNA [NM_027885]                                        | -0.25                | 0.009   | 0.201           |
| 3110062M04Rik           | NM_199145               | ref Mus musculus RIKEN cDNA 3110062M04 gene (3110062M04Rik), transcript variant 1, mRNA [NM_199145]                                             | -0.25                | 0.042   | 0.424           |
| Sumo1                   | NM_009460               | ref Mus musculus SMT3 suppressor of mif two 3 homolog 1 (yeast) (Sumo1), mRNA [NM_009460]                                                       | -0.25                | 0.006   | 0.168           |
| Abhd11                  | NM_145215               | ref Mus musculus abhydrolase domain containing 11 (Abhd11), nuclear gene encoding mitochondrial protein, transcript variant 1, mRNA [NM_145215] | -0.25                | 0.017   | 0.278           |
| 2700097O09Rik           | NM_028314               | ref Mus musculus RIKEN cDNA 2700097O09 gene (2700097O09Rik), transcript variant 1, mRNA [NM_028314]                                             | -0.25                | 0.043   | 0.429           |



Online Supplemental Table IV: Con-STZ Only

| Gene Symbol                | RefSeq                     | Description                                                                                                                                      | logFC<br>Con-STZ | P-value | Adj.<br>P-value |
|----------------------------|----------------------------|--------------------------------------------------------------------------------------------------------------------------------------------------|------------------|---------|-----------------|
| chr2:153163620-153170845_R | chr2:153163620-153170845_R | lincRNA:chr2:153163620-153170845 reverse strand                                                                                                  | -0.25            | 0.015   | 0.259           |
| Fkbp3                      | NM_013902                  | ref Mus musculus FK506 binding protein 3 (Fkbp3), mRNA [NM_013902]                                                                               | -0.25            | 0.006   | 0.158           |
| Hddc2                      | NM_027168                  | ref Mus musculus HD domain containing 2 (Hddc2), mRNA [NM_027168]                                                                                | -0.25            | 0.018   | 0.283           |
| Atp2a2                     | NM_009722                  | ref Mus musculus ATPase, Ca++ transporting, cardiac muscle, slow twitch 2 (Atp2a2), transcript variant 2, mRNA [NM_009722]                       | -0.25            | 0.031   | 0.369           |
| LOC630077                  | XR_031677                  | ref PREDICTED: Mus musculus similar to protein phosphatase 2, regulatory subunit B (B56), alpha isoform (LOC630077), misc RNA [XR_031677]        | -0.25            | 0.014   | 0.253           |
| Dnajc19                    | NM_001026211               | ref Mus musculus DnaJ (Hsp40) homolog, subfamily C, member 19 (Dnajc19), transcript variant 2, mRNA [NM_001026211]                               | -0.25            | 0.036   | 0.395           |
| 1700113I22Rik              | NM_026865                  | ref Mus musculus RIKEN cDNA 1700113I22 gene (1700113I22Rik), mRNA [NM_026865]                                                                    | -0.25            | 0.022   | 0.311           |
| Eid2                       | NM_198425                  | ref Mus musculus EP300 interacting inhibitor of differentiation 2 (Eid2), mRNA [NM_198425]                                                       | -0.25            | 0.021   | 0.303           |
| Nhs1l                      | NM_173390                  | ref Mus musculus NHS-like 1 (Nhs1l), transcript variant 1, mRNA [NM_173390]                                                                      | -0.25            | 0.017   | 0.279           |
| Glr5                       | NM_028419                  | ref Mus musculus glutaredoxin 5 homolog (S. cerevisiae) (Glr5), nuclear gene encoding mitochondrial protein, mRNA [NM_028419]                    | -0.25            | 0.013   | 0.244           |
| Polr3a                     | NM_001081247               | ref Mus musculus polymerase (RNA) III (DNA directed) polypeptide A (Polr3a), mRNA [NM_001081247]                                                 | -0.25            | 0.015   | 0.260           |
| Nanog                      | NM_028016                  | ref Mus musculus Nanog homeobox (Nanog), mRNA [NM_028016]                                                                                        | -0.25            | 0.013   | 0.246           |
| Fzr1                       | NM_019757                  | ref Mus musculus fizzy/cell division cycle 20 related 1 (Drosophila) (Fzr1), mRNA [NM_019757]                                                    | -0.25            | 0.021   | 0.304           |
| Ttc19                      | NM_028360                  | ref Mus musculus tetratricopeptide repeat domain 19 (Ttc19), transcript variant 1, mRNA [NM_028360]                                              | -0.25            | 0.031   | 0.368           |
| Trappc5                    | NM_025701                  | ref Mus musculus trafficking protein particle complex 5 (Trappc5), mRNA [NM_025701]                                                              | -0.25            | 0.027   | 0.347           |
| Cyp2d26                    | NM_029562                  | ref Mus musculus cytochrome P450, family 2, subfamily d, polypeptide 26 (Cyp2d26), mRNA [NM_029562]                                              | -0.26            | 0.041   | 0.418           |
| Ndufa10                    | NM_024197                  | ref Mus musculus NADH dehydrogenase (ubiquinone) 1 alpha subcomplex 10 (Ndufa10), nuclear gene encoding mitochondrial protein, mRNA [NM_024197]  | -0.26            | 0.030   | 0.365           |
| Fanc1                      | NM_025923                  | ref Mus musculus Fanconi anemia, complementation group L (Fanc1), mRNA [NM_025923]                                                               | -0.26            | 0.029   | 0.358           |
| Fam73b                     | NM_175392                  | ref Mus musculus family with sequence similarity 73, member B (Fam73b), mRNA [NM_175392]                                                         | -0.26            | 0.038   | 0.403           |
| Hbs1l                      | NM_019702                  | ref Mus musculus Hbs1-like (S. cerevisiae) (Hbs1l), transcript variant 1, mRNA [NM_019702]                                                       | -0.26            | 0.048   | 0.450           |
| Dullard                    | NM_026017                  | ref Mus musculus Dullard homolog (Xenopus laevis) (Dullard), mRNA [NM_026017]                                                                    | -0.26            | 0.024   | 0.326           |
| Ppp2r2c                    | NM_172994                  | ref Mus musculus protein phosphatase 2 (formerly 2A), regulatory subunit B (PR 52), gamma isoform (Ppp2r2c), mRNA [NM_172994]                    | -0.26            | 0.032   | 0.376           |
| Isg20                      | NM_020583                  | ref Mus musculus interferon-stimulated protein (Isg20), transcript variant 1, mRNA [NM_020583]                                                   | -0.26            | 0.018   | 0.282           |
| Abcb10                     | NM_019552                  | ref Mus musculus ATP-binding cassette, sub-family B (MDR/TAP), member 10 (Abcb10), nuclear gene encoding mitochondrial protein, mRNA [NM_019552] | -0.26            | 0.048   | 0.449           |
| Rnf170                     | NM_029965                  | ref Mus musculus ring finger protein 170 (Rnf170), mRNA [NM_029965]                                                                              | -0.26            | 0.016   | 0.273           |
| BC004004                   | NM_030561                  | ref Mus musculus cDNA sequence BC004004 (BC004004), mRNA [NM_030561]                                                                             | -0.26            | 0.047   | 0.448           |
| chr3:151746091-151753763_F | chr3:151746091-151753763_F | lincRNA:chr3:151746091-151753763 forward strand                                                                                                  | -0.26            | 0.021   | 0.302           |

Online Supplemental Table IV: Con-STZ Only

| Gene Symbol                | RefSeq                     | Description                                                                                                                                                      | logFC<br>Con-STZ | P-value | Adj.<br>P-value |
|----------------------------|----------------------------|------------------------------------------------------------------------------------------------------------------------------------------------------------------|------------------|---------|-----------------|
| Araf                       | NM_001159645               | ref Mus musculus v-raf murine sarcoma 3611 viral oncogene homolog (Araf), transcript variant 2, mRNA [NM_001159645]                                              | -0.26            | 0.022   | 0.310           |
| Gm4479                     | XR_033367                  | ref PREDICTED: Mus musculus similar to ATP synthase, H <sup>+</sup> transporting, mitochondrial F0 complex, subunit c (LOC100047467), misc RNA [XR_033367]       | -0.26            | 0.009   | 0.200           |
| Cbx6                       | NM_028763                  | ref Mus musculus chromobox homolog 6 (Cbx6), mRNA [NM_028763]                                                                                                    | -0.26            | 0.012   | 0.235           |
| 4933403F05Rik              | NM_153794                  | ref Mus musculus RIKEN cDNA 4933403F05 gene (4933403F05Rik), mRNA [NM_153794]                                                                                    | -0.26            | 0.019   | 0.288           |
| chr5:105072936-105074001_F | chr5:105072936-105074001_F | lincRNA:chr5:105072936-105074001 forward strand                                                                                                                  | -0.26            | 0.032   | 0.372           |
| Exosc9                     | NM_019393                  | ref Mus musculus exosome component 9 (Exosc9), mRNA [NM_019393]                                                                                                  | -0.26            | 0.007   | 0.179           |
| Wnk1                       | NM_198703                  | ref Mus musculus WNK lysine deficient protein kinase 1 (Wnk1), transcript variant 1, mRNA [NM_198703]                                                            | -0.26            | 0.044   | 0.431           |
| Coq7                       | NM_009940                  | ref Mus musculus demethyl-Q 7 (Coq7), mRNA [NM_009940]                                                                                                           | -0.26            | 0.006   | 0.170           |
| LOC100045477               | XM_001474374               | ref PREDICTED: Mus musculus hypothetical protein LOC100045477 (LOC100045477), mRNA [XM_001474374]                                                                | -0.26            | 0.039   | 0.413           |
| Tfam                       | NM_009360                  | ref Mus musculus transcription factor A, mitochondrial (Tfam), nuclear gene encoding mitochondrial protein, mRNA [NM_009360]                                     | -0.26            | 0.030   | 0.361           |
| Hdac4                      | NM_207225                  | ref Mus musculus histone deacetylase 4 (Hdac4), mRNA [NM_207225]                                                                                                 | -0.26            | 0.011   | 0.222           |
| Gm12182                    | XR_031616                  | ref PREDICTED: Mus musculus similar to glyceraldehyde-3-phosphate dehydrogenase (LOC667163), misc RNA [XR_031616]                                                | -0.26            | 0.033   | 0.376           |
| LOC638803                  | XM_001477893               | ref PREDICTED: Mus musculus similar to TOM22 protein (LOC638803), mRNA [XM_001477893]                                                                            | -0.26            | 0.009   | 0.204           |
| Rfwd3                      | NM_146218                  | ref Mus musculus ring finger and WD repeat domain 3 (Rfwd3), mRNA [NM_146218]                                                                                    | -0.26            | 0.005   | 0.145           |
| Csnk2a1                    | NM_007788                  | ref Mus musculus casein kinase 2, alpha 1 polypeptide (Csnk2a1), mRNA [NM_007788]                                                                                | -0.26            | 0.006   | 0.158           |
| Ldhb                       | NM_008492                  | ref Mus musculus lactate dehydrogenase B (Ldhb), mRNA [NM_008492]                                                                                                | -0.26            | 0.005   | 0.145           |
| Taf6l                      | NM_001177798               | ref Mus musculus TAF6-like RNA polymerase II, p300/CBP-associated factor (PCAF)-associated factor (Taf6l), transcript variant 2, mRNA [NM_001177798]             | -0.26            | 0.029   | 0.353           |
| Prpsap2                    | NM_144806                  | ref Mus musculus phosphoribosyl pyrophosphate synthetase-associated protein 2 (Prpsap2), transcript variant 1, mRNA [NM_144806]                                  | -0.26            | 0.034   | 0.385           |
| 2410091C18Rik              | NM_028611                  | ref Mus musculus RIKEN cDNA 2410091C18 gene (2410091C18Rik), mRNA [NM_028611]                                                                                    | -0.26            | 0.008   | 0.191           |
| Gm4948                     | XR_004743                  | ref PREDICTED: Mus musculus similar to glycoprotein, synaptic 2 (LOC675178), misc RNA [XR_004743]                                                                | -0.26            | 0.034   | 0.385           |
| Pdcl                       | NM_026176                  | ref Mus musculus phosducin-like (Pdcl), mRNA [NM_026176]                                                                                                         | -0.26            | 0.045   | 0.437           |
| ETG04_27747                | ETG04_27747                |                                                                                                                                                                  | -0.26            | 0.047   | 0.447           |
| 6330509M05Rik              | AK031957                   | gb Mus musculus adult male medulla oblongata cDNA, RIKEN full-length enriched library, clone:6330509M05 product:unclassifiable, full insert sequence. [AK031957] | -0.26            | 0.040   | 0.416           |
| Ttc19                      | NM_028360                  | ref Mus musculus tetratricopeptide repeat domain 19 (Ttc19), transcript variant 1, mRNA [NM_028360]                                                              | -0.26            | 0.039   | 0.410           |
| Gm5333                     | XR_033672                  | ref PREDICTED: Mus musculus similar to tetratricopeptide repeat domain 35 (LOC384631), misc RNA [XR_033672]                                                      | -0.26            | 0.003   | 0.124           |
| chr14:22267795-22319045_F  | chr14:22267795-22319045_F  | lincRNA:chr14:22267795-22319045 forward strand                                                                                                                   | -0.26            | 0.015   | 0.260           |
| Atp5sl                     | NM_025504                  | ref Mus musculus ATP5S-like (Atp5sl), mRNA [NM_025504]                                                                                                           | -0.26            | 0.036   | 0.393           |

Online Supplemental Table IV: Con-STZ Only

| Gene Symbol                       | RefSeq                     | Description                                                                                                                  | logFC<br>Con-STZ | P-value | Adj.<br>P-value |
|-----------------------------------|----------------------------|------------------------------------------------------------------------------------------------------------------------------|------------------|---------|-----------------|
| <b>Bod1</b>                       | NM_001024919               | ref Mus musculus biorientation of chromosomes in cell division 1 (Bod1), mRNA [NM_001024919]                                 | -0.26            | 0.012   | 0.235           |
| <b>Tm2d3</b>                      | NM_178056                  | ref Mus musculus TM2 domain containing 3 (Tm2d3), transcript variant 2, mRNA [NM_178056]                                     | -0.26            | 0.019   | 0.291           |
| <b>Cenpq</b>                      | NM_031863                  | ref Mus musculus centromere protein Q (Cenpq), mRNA [NM_031863]                                                              | -0.26            | 0.018   | 0.284           |
| <b>2700046G09Rik</b>              | NR_033198                  | ref Mus musculus RIKEN cDNA 2700046G09 gene (2700046G09Rik), non-coding RNA [NR_033198]                                      | -0.26            | 0.022   | 0.314           |
| <b>Zfp503</b>                     | NM_145459                  | ref Mus musculus zinc finger protein 503 (Zfp503), mRNA [NM_145459]                                                          | -0.26            | 0.043   | 0.428           |
| <b>Rilpl1</b>                     | NM_021430                  | ref Mus musculus Rab interacting lysosomal protein-like 1 (Rilpl1), mRNA [NM_021430]                                         | -0.27            | 0.003   | 0.119           |
| <b>Apba2</b>                      | NM_007461                  | ref Mus musculus amyloid beta (A4) precursor protein-binding, family A, member 2 (Apba2), mRNA [NM_007461]                   | -0.27            | 0.040   | 0.414           |
| <b>Asf1b</b>                      | NM_024184                  | ref Mus musculus ASF1 anti-silencing function 1 homolog B (S. cerevisiae) (Asf1b), mRNA [NM_024184]                          | -0.27            | 0.015   | 0.266           |
| <b>Ogfod2</b>                     | NM_025671                  | ref Mus musculus 2-oxoglutarate and iron-dependent oxygenase domain containing 2 (Ogfod2), mRNA [NM_025671]                  | -0.27            | 0.009   | 0.200           |
| <b>Esrrg</b>                      | NM_011935                  | ref Mus musculus estrogen-related receptor gamma (Esrrg), mRNA [NM_011935]                                                   | -0.27            | 0.021   | 0.303           |
| <b>Isg20l2</b>                    | NM_177663                  | ref Mus musculus interferon stimulated exonuclease gene 20-like 2 (Isg20l2), mRNA [NM_177663]                                | -0.27            | 0.032   | 0.375           |
| <b>chr8:119092623-119094219_R</b> | chr8:119092623-119094219_R | lincRNA:chr8:119092623-119094219 reverse strand                                                                              | -0.27            | 0.012   | 0.236           |
| <b>Zfx2as</b>                     | NR_004444                  | ref Mus musculus zinc finger homeobox 2, antisense (Zfx2as), antisense RNA [NR_004444]                                       | -0.27            | 0.025   | 0.331           |
| <b>Pin1l</b>                      | NM_001033768               | ref Mus musculus peptidylprolyl cis/trans isomerase, NIMA-interacting 1-like (Pin1l), mRNA [NM_001033768]                    | -0.27            | 0.017   | 0.278           |
| <b>Fam96a</b>                     | NM_026635                  | ref Mus musculus family with sequence similarity 96, member A (Fam96a), mRNA [NM_026635]                                     | -0.27            | 0.011   | 0.227           |
| <b>4932422M17Rik</b>              | XM_001473799               | ref PREDICTED: Mus musculus RIKEN cDNA 4932422M17 gene (4932422M17Rik), mRNA [XM_001473799]                                  | -0.27            | 0.041   | 0.419           |
| <b>LOC100047337</b>               | XM_001477762               | ref PREDICTED: Mus musculus hypothetical protein LOC100047337 (LOC100047337), mRNA [XM_001477762]                            | -0.27            | 0.029   | 0.353           |
| <b>Mrps25</b>                     | NM_025578                  | ref Mus musculus mitochondrial ribosomal protein S25 (Mrps25), nuclear gene encoding mitochondrial protein, mRNA [NM_025578] | -0.27            | 0.007   | 0.178           |
| <b>Olf1333</b>                    | NM_207157                  | ref Mus musculus olfactory receptor 1333 (Olf1333), mRNA [NM_207157]                                                         | -0.27            | 0.049   | 0.455           |
| <b>Camk2g</b>                     | NM_178597                  | ref Mus musculus calcium/calmodulin-dependent protein kinase II gamma (Camk2g), transcript variant 1, mRNA [NM_178597]       | -0.27            | 0.049   | 0.456           |
| <b>2010011I20Rik</b>              | NM_025912                  | ref Mus musculus RIKEN cDNA 2010011I20 gene (2010011I20Rik), mRNA [NM_025912]                                                | -0.27            | 0.042   | 0.425           |
| <b>Pdf</b>                        | NM_026513                  | ref Mus musculus peptide deformylase (mitochondrial) (Pdf), nuclear gene encoding mitochondrial protein, mRNA [NM_026513]    | -0.27            | 0.016   | 0.274           |
| <b>Fam178a</b>                    | NM_001081225               | ref Mus musculus family with sequence similarity 178, member A (Fam178a), mRNA [NM_001081225]                                | -0.27            | 0.021   | 0.303           |
| <b>Gemin7</b>                     | NM_027189                  | ref Mus musculus gem (nuclear organelle) associated protein 7 (Gemin7), mRNA [NM_027189]                                     | -0.27            | 0.006   | 0.168           |
| <b>Pgpep1</b>                     | NM_023217                  | ref Mus musculus pyroglutaryl-peptidase I (Pgpep1), mRNA [NM_023217]                                                         | -0.27            | 0.042   | 0.426           |
| <b>Tfam</b>                       | NM_009360                  | ref Mus musculus transcription factor A, mitochondrial (Tfam), nuclear gene encoding mitochondrial protein, mRNA [NM_009360] | -0.27            | 0.032   | 0.373           |
| <b>Coq9</b>                       | NM_026452                  | ref Mus musculus coenzyme Q9 homolog (yeast) (Coq9), nuclear gene encoding mitochondrial protein, mRNA [NM_026452]           | -0.27            | 0.020   | 0.298           |

Online Supplemental Table IV: Con-STZ Only

| Gene Symbol                | RefSeq                     | Description                                                                                                                                                    | logFC<br>Con-STZ | P-value | Adj.<br>P-value |
|----------------------------|----------------------------|----------------------------------------------------------------------------------------------------------------------------------------------------------------|------------------|---------|-----------------|
| Klhdc7a                    | NM_173427                  | ref Mus musculus kelch domain containing 7A (Klhdc7a), mRNA [NM_173427]                                                                                        | -0.27            | 0.021   | 0.304           |
| chr10:6480075-6603900_R    | chr10:6480075-6603900_R    | lincRNA:chr10:6480075-6603900 reverse strand                                                                                                                   | -0.27            | 0.047   | 0.446           |
| chr7:91558475-91733625_F   | chr7:91558475-91733625_F   | lincRNA:chr7:91558475-91733625 forward strand                                                                                                                  | -0.27            | 0.031   | 0.368           |
| Clcn3                      | NM_173874                  | ref Mus musculus chloride channel 3 (Clcn3), transcript variant e, mRNA [NM_173874]                                                                            | -0.27            | 0.021   | 0.306           |
| Osbp2                      | NM_152818                  | ref Mus musculus oxysterol binding protein 2 (Osbp2), mRNA [NM_152818]                                                                                         | -0.27            | 0.036   | 0.395           |
| chr13:70745306-70837331_F  | chr13:70745306-70837331_F  | lincRNA:chr13:70745306-70837331 forward strand                                                                                                                 | -0.27            | 0.016   | 0.274           |
| 2810432L12Rik              | NM_025944                  | ref Mus musculus RIKEN cDNA 2810432L12 gene (2810432L12Rik), mRNA [NM_025944]                                                                                  | -0.27            | 0.025   | 0.331           |
| ENSMUST00000042883         | ENSMUST00000042883         | ens cDNA sequence BC006965 (BC006965), non-coding RNA [Source:RefSeq DNA;Acc:NR_024085] [ENSMUST00000042883]                                                   | -0.27            | 0.027   | 0.348           |
| Fzr1                       | NM_019757                  | ref Mus musculus fizzy/cell division cycle 20 related 1 (Drosophila) (Fzr1), mRNA [NM_019757]                                                                  | -0.27            | 0.012   | 0.231           |
| Fzd9                       | NM_010246                  | ref Mus musculus frizzled homolog 9 (Drosophila) (Fzd9), mRNA [NM_010246]                                                                                      | -0.27            | 0.004   | 0.132           |
| Sufu                       | NM_015752                  | ref Mus musculus suppressor of fused homolog (Drosophila) (Sufu), transcript variant 1, mRNA [NM_015752]                                                       | -0.27            | 0.047   | 0.447           |
| 0910001L09Rik              | NM_001081108               | ref Mus musculus RIKEN cDNA 0910001L09 gene (0910001L09Rik), mRNA [NM_001081108]                                                                               | -0.27            | 0.009   | 0.196           |
| Pomc                       | NM_008895                  | ref Mus musculus pro-opiomelanocortin-alpha (Pomc), mRNA [NM_008895]                                                                                           | -0.27            | 0.034   | 0.385           |
| Hist1h1a                   | NM_030609                  | ref Mus musculus histone cluster 1, H1a (Hist1h1a), mRNA [NM_030609]                                                                                           | -0.27            | 0.026   | 0.338           |
| 2810013P06Rik              | AK077895                   | gb Mus musculus 13 days embryo male testis cDNA, RIKEN full-length enriched library, clone:6030419N23 product:unclassifiable, full insert sequence. [AK077895] | -0.27            | 0.017   | 0.279           |
| chr17:45524689-45525320_R  | chr17:45524689-45525320_R  | lincRNA:chr17:45524689-45525320 reverse strand                                                                                                                 | -0.27            | 0.043   | 0.428           |
| chr4:119967625-119978325_F | chr4:119967625-119978325_F | lincRNA:chr4:119967625-119978325 forward strand                                                                                                                | -0.27            | 0.014   | 0.251           |
| Lpgat1                     | NM_001134829               | ref Mus musculus lysophosphatidylglycerol acyltransferase 1 (Lpgat1), transcript variant 1, mRNA [NM_001134829]                                                | -0.27            | 0.026   | 0.337           |
| Aifm1                      | NM_012019                  | ref Mus musculus apoptosis-inducing factor, mitochondrion-associated 1 (Aifm1), nuclear gene encoding mitochondrial protein, mRNA [NM_012019]                  | -0.27            | 0.011   | 0.227           |
| Snape3                     | NM_029949                  | ref Mus musculus small nuclear RNA activating complex, polypeptide 3 (Snape3), mRNA [NM_029949]                                                                | -0.27            | 0.043   | 0.430           |
| Dysfip1                    | NM_026814                  | ref Mus musculus dysferlin interacting protein 1 (Dysfip1), mRNA [NM_026814]                                                                                   | -0.27            | 0.048   | 0.450           |
| Hars2                      | NM_080636                  | ref Mus musculus histidyl-tRNA synthetase 2, mitochondrial (putative) (Hars2), nuclear gene encoding mitochondrial protein, mRNA [NM_080636]                   | -0.27            | 0.023   | 0.318           |
| Lym2                       | NM_175364                  | ref Mus musculus LYR motif containing 2 (Lym2), mRNA [NM_175364]                                                                                               | -0.27            | 0.020   | 0.298           |
| Gm5899                     | XM_620527                  | ref PREDICTED: Mus musculus predicted gene, EG545982 (EG545982), mRNA [XM_620527]                                                                              | -0.27            | 0.033   | 0.377           |
| Aif1l                      | NM_145144                  | ref Mus musculus allograft inflammatory factor 1-like (Aif1l), mRNA [NM_145144]                                                                                | -0.27            | 0.020   | 0.298           |
| Immp1l                     | NM_028260                  | ref Mus musculus IMP1 inner mitochondrial membrane peptidase-like (S. cerevisiae) (Immp1l), nuclear gene encoding mitochondrial protein, mRNA [NM_028260]      | -0.27            | 0.012   | 0.236           |
| 5033414D02Rik              | NM_026362                  | ref Mus musculus RIKEN cDNA 5033414D02 gene (5033414D02Rik), mRNA [NM_026362]                                                                                  | -0.27            | 0.036   | 0.394           |
| Gm8709                     | NR_033633                  | ref Mus musculus predicted gene 8709 (Gm8709), non-coding RNA [NR_033633]                                                                                      | -0.27            | 0.004   | 0.135           |

Online Supplemental Table IV: Con-STZ Only

| Gene Symbol                       | RefSeq                     | Description                                                                                                                               | logFC<br>Con-STZ | P-value | Adj.<br>P-value |
|-----------------------------------|----------------------------|-------------------------------------------------------------------------------------------------------------------------------------------|------------------|---------|-----------------|
| <b>Pxmp3</b>                      | NM_008994                  | ref Mus musculus peroxisomal membrane protein 3 (Pxmp3), transcript variant 1, mRNA [NM_008994]                                           | -0.27            | 0.013   | 0.241           |
| <b>Btrc</b>                       | NM_001037758               | ref Mus musculus beta-transducin repeat containing protein (Btrc), transcript variant 1, mRNA [NM_001037758]                              | -0.27            | 0.013   | 0.245           |
| <b>Tatdn3</b>                     | NM_001163421               | ref Mus musculus TatD DNase domain containing 3 (Tatdn3), transcript variant 2, mRNA [NM_001163421]                                       | -0.27            | 0.008   | 0.193           |
| <b>Pdzd9</b>                      | NM_001040137               | ref Mus musculus PDZ domain containing 9 (Pdzd9), transcript variant 2, mRNA [NM_001040137]                                               | -0.27            | 0.027   | 0.348           |
| <b>Pik3r6</b>                     | NM_001004435               | ref Mus musculus phosphoinositide-3-kinase, regulatory subunit 6 (Pik3r6), transcript variant 2, mRNA [NM_001004435]                      | -0.28            | 0.022   | 0.313           |
| <b>Fahd1</b>                      | NM_023480                  | ref Mus musculus fumarylacetoacetate hydrolase domain containing 1 (Fahd1), nuclear gene encoding mitochondrial protein, mRNA [NM_023480] | -0.28            | 0.019   | 0.289           |
| <b>Hist1h2ak</b>                  | NM_178183                  | ref Mus musculus histone cluster 1, H2ak (Hist1h2ak), mRNA [NM_178183]                                                                    | -0.28            | 0.036   | 0.395           |
| <b>Gm9731</b>                     | NR_003107                  | ref Mus musculus predicted gene 9731 (Gm9731), non-coding RNA [NR_003107]                                                                 | -0.28            | 0.013   | 0.248           |
| <b>Deb1</b>                       | NM_026794                  | ref Mus musculus differentially expressed in B16F10 1 (Deb1), mRNA [NM_026794]                                                            | -0.28            | 0.035   | 0.388           |
| <b>Gm6981</b>                     | NR_023357                  | ref Mus musculus predicted pseudogene 6981 (Gm6981), non-coding RNA [NR_023357]                                                           | -0.28            | 0.033   | 0.376           |
| <b>chr14:22267795-22319045_F</b>  | chr14:22267795-22319045_F  | lincRNA:chr14:22267795-22319045 forward strand                                                                                            | -0.28            | 0.008   | 0.190           |
| <b>Srsf7</b>                      | NM_146083                  | ref Mus musculus serine/arginine-rich splicing factor 7 (Srsf7), mRNA [NM_146083]                                                         | -0.28            | 0.038   | 0.405           |
| <b>chr6:35201798-35217831_R</b>   | chr6:35201798-35217831_R   | lincRNA:chr6:35201798-35217831 reverse strand                                                                                             | -0.28            | 0.009   | 0.199           |
| <b>Syngn1</b>                     | NM_009303                  | ref Mus musculus synaptogyrin 1 (Syngn1), transcript variant 1b, mRNA [NM_009303]                                                         | -0.28            | 0.018   | 0.281           |
| <b>Gm10046</b>                    | NR_033484                  | ref Mus musculus predicted gene 10046 (Gm10046), non-coding RNA [NR_033484]                                                               | -0.28            | 0.036   | 0.393           |
| <b>chr1:141070245-141076841_F</b> | chr1:141070245-141076841_F | lincRNA:chr1:141070245-141076841 forward strand                                                                                           | -0.28            | 0.023   | 0.321           |
| <b>Cpn2</b>                       | NM_027904                  | ref Mus musculus carboxypeptidase N, polypeptide 2 (Cpn2), mRNA [NM_027904]                                                               | -0.28            | 0.020   | 0.295           |
| <b>Gm11225</b>                    | XR_033232                  | ref PREDICTED: Mus musculus similar to 3-hydroxyisobutyrate dehydrogenase (LOC636266), misc RNA [XR_033232]                               | -0.28            | 0.039   | 0.409           |
| <b>Hist2h2ac</b>                  | NM_175662                  | ref Mus musculus histone cluster 2, H2ac (Hist2h2ac), mRNA [NM_175662]                                                                    | -0.28            | 0.028   | 0.348           |
| <b>Gm8174</b>                     | XR_001896                  | ref PREDICTED: Mus musculus predicted gene, EG666579 (EG666579), misc RNA [XR_001896]                                                     | -0.28            | 0.006   | 0.160           |
| <b>ligp1</b>                      | NM_001146275               | ref Mus musculus interferon inducible GTPase 1 (ligp1), transcript variant 2, mRNA [NM_001146275]                                         | -0.28            | 0.043   | 0.428           |
| <b>Comm9</b>                      | NM_029635                  | ref Mus musculus COMM domain containing 9 (Comm9), mRNA [NM_029635]                                                                       | -0.28            | 0.010   | 0.213           |
| <b>Vtn</b>                        | NM_011707                  | ref Mus musculus vitronectin (Vtn), mRNA [NM_011707]                                                                                      | -0.28            | 0.035   | 0.388           |
| <b>Rbx1</b>                       | NM_019712                  | ref Mus musculus ring-box 1 (Rbx1), mRNA [NM_019712]                                                                                      | -0.28            | 0.011   | 0.217           |
| <b>Kif21a</b>                     | NM_001109040               | ref Mus musculus kinesin family member 21A (Kif21a), transcript variant 1, mRNA [NM_001109040]                                            | -0.28            | 0.013   | 0.247           |
| <b>chr16:43623581-43642715_R</b>  | chr16:43623581-43642715_R  | lincRNA:chr16:43623581-43642715 reverse strand                                                                                            | -0.28            | 0.015   | 0.263           |
| <b>Zfp612</b>                     | NM_175480                  | ref Mus musculus zinc finger protein 612 (Zfp612), mRNA [NM_175480]                                                                       | -0.28            | 0.039   | 0.409           |
| <b>Fbrsl1</b>                     | NM_001142642               | ref Mus musculus fibrosin-like 1 (Fbrsl1), transcript variant 1, mRNA [NM_001142642]                                                      | -0.28            | 0.046   | 0.445           |
| <b>Mrpl47</b>                     | NM_029017                  | ref Mus musculus mitochondrial ribosomal protein L47 (Mrpl47), nuclear gene encoding mitochondrial protein, mRNA [NM_029017]              | -0.28            | 0.023   | 0.321           |

Online Supplemental Table IV: Con-STZ Only

| Gene Symbol               | RefSeq                    | Description                                                                                                                                                                       | logFC<br>Con-STZ | P-value | Adj.<br>P-value |
|---------------------------|---------------------------|-----------------------------------------------------------------------------------------------------------------------------------------------------------------------------------|------------------|---------|-----------------|
| ENSMUST00000019066        | ENSMUST00000019066        | ens[proline, glutamic acid and leucine rich protein 1 Gene [Source:MGI (curated);Acc:MGI:1922523] [ENSMUST00000019066]                                                            | -0.28            | 0.013   | 0.247           |
| 2810408A11Rik             | NM_027419                 | ref  Mus musculus RIKEN cDNA 2810408A11 gene (2810408A11Rik), mRNA [NM_027419]                                                                                                    | -0.28            | 0.040   | 0.416           |
| Ecsit                     | NM_012029                 | ref  Mus musculus ECSIT homolog (Drosophila) (Ecsit), nuclear gene encoding mitochondrial protein, mRNA [NM_012029]                                                               | -0.28            | 0.019   | 0.291           |
| Rgs7                      | NM_011880                 | ref  Mus musculus regulator of G protein signaling 7 (Rgs7), mRNA [NM_011880]                                                                                                     | -0.28            | 0.021   | 0.305           |
| Sp9                       | NM_001005343              | ref  Mus musculus trans-acting transcription factor 9 (Sp9), mRNA [NM_001005343]                                                                                                  | -0.28            | 0.033   | 0.376           |
| chr4:57372663-57377164_R  | chr4:57372663-57377164_R  | lincRNA:chr4:57372663-57377164 reverse strand                                                                                                                                     | -0.28            | 0.036   | 0.394           |
| chr13:62117000-62164075_R | chr13:62117000-62164075_R | lincRNA:chr13:62117000-62164075 reverse strand                                                                                                                                    | -0.28            | 0.010   | 0.208           |
| 3110043O21Rik             | NM_001081343              | ref  Mus musculus RIKEN cDNA 3110043O21 gene (3110043O21Rik), mRNA [NM_001081343]                                                                                                 | -0.28            | 0.008   | 0.192           |
| Opa3                      | NM_207525                 | ref  Mus musculus optic atrophy 3 (human) (Opa3), nuclear gene encoding mitochondrial protein, mRNA [NM_207525]                                                                   | -0.28            | 0.038   | 0.402           |
| Gm3212                    | XM_001476815              | ref  PREDICTED: Mus musculus hypothetical protein LOC100041222 (LOC100041222), mRNA [XM_001476815]                                                                                | -0.28            | 0.047   | 0.446           |
| Il18bp                    | NM_010531                 | ref  Mus musculus interleukin 18 binding protein (Il18bp), mRNA [NM_010531]                                                                                                       | -0.28            | 0.038   | 0.406           |
| Mrpl2                     | NM_025302                 | ref  Mus musculus mitochondrial ribosomal protein L2 (Mrpl2), nuclear gene encoding mitochondrial protein, mRNA [NM_025302]                                                       | -0.28            | 0.003   | 0.117           |
| Pole4                     | NM_025882                 | ref  Mus musculus polymerase (DNA-directed), epsilon 4 (p12 subunit) (Pole4), mRNA [NM_025882]                                                                                    | -0.28            | 0.012   | 0.232           |
| Dld                       | NM_007861                 | ref  Mus musculus dihydrolipoamide dehydrogenase (Dld), mRNA [NM_007861]                                                                                                          | -0.28            | 0.008   | 0.183           |
| Smg7                      | NM_001005507              | ref  Mus musculus Smg-7 homolog, nonsense mediated mRNA decay factor (C. elegans) (Smg7), transcript variant 3, mRNA [NM_001005507]                                               | -0.28            | 0.005   | 0.154           |
| Klhdc4                    | NM_145605                 | ref  Mus musculus kelch domain containing 4 (Klhdc4), mRNA [NM_145605]                                                                                                            | -0.28            | 0.004   | 0.140           |
| Tomm40                    | NM_001109748              | ref  Mus musculus translocase of outer mitochondrial membrane 40 homolog (yeast) (Tomm40), nuclear gene encoding mitochondrial protein, transcript variant 1, mRNA [NM_001109748] | -0.28            | 0.017   | 0.275           |
| Nedd4l                    | NM_031881                 | ref  Mus musculus neural precursor cell expressed, developmentally down-regulated gene 4-like (Nedd4l), transcript variant 2, mRNA [NM_031881]                                    | -0.28            | 0.044   | 0.433           |
| Tmem38a                   | NM_144534                 | ref  Mus musculus transmembrane protein 38A (Tmem38a), mRNA [NM_144534]                                                                                                           | -0.28            | 0.016   | 0.273           |
| 5830433G22Rik             | AK142303                  | gb  Mus musculus 13 days embryo heart cDNA, RIKEN full-length enriched library, clone:D330041D22 product:unclassifiable, full insert sequence. [AK142303]                         | -0.28            | 0.019   | 0.290           |
| 3110082D06Rik             | NM_028474                 | ref  Mus musculus RIKEN cDNA 3110082D06 gene (3110082D06Rik), mRNA [NM_028474]                                                                                                    | -0.28            | 0.028   | 0.352           |
| Dgcr2                     | NM_010048                 | ref  Mus musculus DiGeorge syndrome critical region gene 2 (Dgcr2), transcript variant 1, mRNA [NM_010048]                                                                        | -0.28            | 0.010   | 0.211           |
| Diablo                    | NM_023232                 | ref  Mus musculus diablo homolog (Drosophila) (Diablo), nuclear gene encoding mitochondrial protein, mRNA [NM_023232]                                                             | -0.29            | 0.028   | 0.349           |
| Wdr91                     | NM_001013366              | ref  Mus musculus WD repeat domain 91 (Wdr91), mRNA [NM_001013366]                                                                                                                | -0.29            | 0.002   | 0.102           |
| Eid2b                     | NM_001177427              | ref  Mus musculus EP300 interacting inhibitor of differentiation 2B (Eid2b), mRNA [NM_001177427]                                                                                  | -0.29            | 0.006   | 0.167           |



Online Supplemental Table IV: Con-STZ Only

| Gene Symbol                 | RefSeq                      | Description                                                                                                                                               | logFC<br>Con-STZ | P-value | Adj.<br>P-value |
|-----------------------------|-----------------------------|-----------------------------------------------------------------------------------------------------------------------------------------------------------|------------------|---------|-----------------|
| Gfra4                       | NM_020014                   | ref Mus musculus glial cell line derived neurotrophic factor family receptor alpha 4 (Gfra4), transcript variant 2, mRNA [NM_020014]                      | -0.29            | 0.049   | 0.456           |
| Znhit3                      | NM_001005223                | ref Mus musculus zinc finger, HIT type 3 (Znhit3), mRNA [NM_001005223]                                                                                    | -0.29            | 0.011   | 0.224           |
| Fam163b                     | NM_175427                   | ref Mus musculus family with sequence similarity 163, member B (Fam163b), mRNA [NM_175427]                                                                | -0.29            | 0.040   | 0.415           |
| Bpgm                        | NM_007563                   | ref Mus musculus 2,3-bisphosphoglycerate mutase (Bpgm), mRNA [NM_007563]                                                                                  | -0.29            | 0.012   | 0.236           |
| Gm11412                     | XM_001474158                | ref PREDICTED: Mus musculus hypothetical protein LOC100040144 (LOC100040144), mRNA [XM_001474158]                                                         | -0.29            | 0.016   | 0.273           |
| chrX:98680220-98718445_R    | chrX:98680220-98718445_R    | lincRNA:chrX:98680220-98718445 reverse strand                                                                                                             | -0.29            | 0.038   | 0.401           |
| Hus1                        | NM_008316                   | ref Mus musculus Hus1 homolog (S. pombe) (Hus1), mRNA [NM_008316]                                                                                         | -0.29            | 0.043   | 0.427           |
| Ermp1                       | NM_001081213                | ref Mus musculus endoplasmic reticulum metalloproteinase 1 (Ermp1), mRNA [NM_001081213]                                                                   | -0.29            | 0.032   | 0.373           |
| Mrps9                       | NM_023514                   | ref Mus musculus mitochondrial ribosomal protein S9 (Mrps9), nuclear gene encoding mitochondrial protein, mRNA [NM_023514]                                | -0.29            | 0.009   | 0.201           |
| Itsn1                       | NM_010587                   | ref Mus musculus intersectin 1 (SH3 domain protein 1A) (Itsn1), transcript variant 1, mRNA [NM_010587]                                                    | -0.29            | 0.039   | 0.410           |
| Chd2                        | NM_001081345                | ref Mus musculus chromodomain helicase DNA binding protein 2 (Chd2), mRNA [NM_001081345]                                                                  | -0.29            | 0.018   | 0.286           |
| Pde4b                       | NM_019840                   | ref Mus musculus phosphodiesterase 4B, cAMP specific (Pde4b), transcript variant 1, mRNA [NM_019840]                                                      | -0.29            | 0.014   | 0.250           |
| Gtl3                        | NM_008187                   | ref Mus musculus gene trap locus 3 (Gtl3), mRNA [NM_008187]                                                                                               | -0.29            | 0.032   | 0.375           |
| Abhd6                       | NM_025341                   | ref Mus musculus abhydrolase domain containing 6 (Abhd6), mRNA [NM_025341]                                                                                | -0.29            | 0.035   | 0.389           |
| Mrpl30                      | NM_027098                   | ref Mus musculus mitochondrial ribosomal protein L30 (Mrpl30), nuclear gene encoding mitochondrial protein, mRNA [NM_027098]                              | -0.29            | 0.005   | 0.156           |
| chr3:85589154-85621215_R    | chr3:85589154-85621215_R    | lincRNA:chr3:85589154-85621215 reverse strand                                                                                                             | -0.29            | 0.023   | 0.319           |
| Aven                        | NM_028844                   | ref Mus musculus apoptosis, caspase activation inhibitor (Aven), transcript variant 1, mRNA [NM_028844]                                                   | -0.29            | 0.011   | 0.224           |
| Gm14288                     | NM_001033123                | ref Mus musculus predicted gene 14288 (Gm14288), mRNA [NM_001033123]                                                                                      | -0.29            | 0.024   | 0.325           |
| Acot8                       | NM_133240                   | ref Mus musculus acyl-CoA thioesterase 8 (Acot8), mRNA [NM_133240]                                                                                        | -0.29            | 0.018   | 0.285           |
| Pde8b                       | NM_001170669                | ref Mus musculus phosphodiesterase 8B (Pde8b), transcript variant 1, mRNA [NM_001170669]                                                                  | -0.29            | 0.050   | 0.457           |
| chr13:59969950-59989725_F   | chr13:59969950-59989725_F   | lincRNA:chr13:59969950-59989725 forward strand                                                                                                            | -0.29            | 0.049   | 0.454           |
| Phactr2                     | NM_001033257                | ref Mus musculus phosphatase and actin regulator 2 (Phactr2), mRNA [NM_001033257]                                                                         | -0.29            | 0.013   | 0.242           |
| Nudt19                      | NM_033080                   | ref Mus musculus nudix (nucleoside diphosphate linked moiety X)-type motif 19 (Nudt19), nuclear gene encoding mitochondrial protein, mRNA [NM_033080]     | -0.29            | 0.005   | 0.154           |
| Gm5129                      | NR_028426                   | ref Mus musculus predicted gene 5129 (Gm5129), non-coding RNA [NR_028426]                                                                                 | -0.29            | 0.037   | 0.399           |
| Hmgn2                       | NM_016957                   | ref Mus musculus high mobility group nucleosomal binding domain 2 (Hmgn2), mRNA [NM_016957]                                                               | -0.29            | 0.024   | 0.327           |
| Immp1l                      | NM_028260                   | ref Mus musculus IMP1 inner mitochondrial membrane peptidase-like (S. cerevisiae) (Immp1l), nuclear gene encoding mitochondrial protein, mRNA [NM_028260] | -0.29            | 0.004   | 0.141           |
| Nefh                        | NM_010904                   | ref Mus musculus neurofilament, heavy polypeptide (Nefh), mRNA [NM_010904]                                                                                | -0.29            | 0.013   | 0.249           |
| chr13:104591573-104599048_F | chr13:104591573-104599048_F | lincRNA:chr13:104591573-104599048 forward strand                                                                                                          | -0.29            | 0.049   | 0.455           |

Online Supplemental Table IV: Con-STZ Only

| Gene Symbol                | RefSeq                     | Description                                                                                                                                                    | logFC<br>Con-STZ | P-value | Adj.<br>P-value |
|----------------------------|----------------------------|----------------------------------------------------------------------------------------------------------------------------------------------------------------|------------------|---------|-----------------|
| Ltbp1                      | NM_019919                  | ref Mus musculus latent transforming growth factor beta binding protein 1 (Ltbp1), transcript variant 1, mRNA [NM_019919]                                      | -0.29            | 0.048   | 0.450           |
| Ythdc2                     | NM_001163013               | ref Mus musculus YTH domain containing 2 (Ythdc2), mRNA [NM_001163013]                                                                                         | -0.29            | 0.027   | 0.342           |
| GlrX                       | NM_053108                  | ref Mus musculus glutaredoxin (GlrX), mRNA [NM_053108]                                                                                                         | -0.29            | 0.016   | 0.267           |
| Kctd1                      | NM_001142731               | ref Mus musculus potassium channel tetramerisation domain containing 1 (Kctd1), transcript variant 1, mRNA [NM_001142731]                                      | -0.29            | 0.033   | 0.376           |
| 5830454E08Rik              | ENSIMUST00000064646        | ens RIKEN cDNA 5830454E08 gene Gene [Source:MGI Symbol;Acc:MGI:1923350] [ENSIMUST00000064646]                                                                  | -0.29            | 0.013   | 0.248           |
| chr8:124355710-124401160_F | chr8:124355710-124401160_F | lincRNA:chr8:124355710-124401160 forward strand                                                                                                                | -0.29            | 0.008   | 0.194           |
| Gm5130                     | XR_032640                  | ref PREDICTED: Mus musculus similar to Mitochondrial methionyl-tRNA formyltransferase (LOC333184), misc RNA [XR_032640]                                        | -0.29            | 0.032   | 0.374           |
| Cdk20                      | NM_053180                  | ref Mus musculus cyclin-dependent kinase 20 (Cdk20), mRNA [NM_053180]                                                                                          | -0.29            | 0.008   | 0.191           |
| chr1:139713316-139913366_R | chr1:139713316-139913366_R | lincRNA:chr1:139713316-139913366 reverse strand                                                                                                                | -0.29            | 0.042   | 0.423           |
| chr1:33893475-33903900_F   | chr1:33893475-33903900_F   | lincRNA:chr1:33893475-33903900 forward strand                                                                                                                  | -0.29            | 0.047   | 0.446           |
| IrX4                       | NM_018885                  | ref Mus musculus Iroquois related homeobox 4 (Drosophila) (IrX4), mRNA [NM_018885]                                                                             | -0.29            | 0.010   | 0.209           |
| Vmn1r212                   | NM_134241                  | ref Mus musculus vomeronasal 1 receptor 212 (Vmn1r212), mRNA [NM_134241]                                                                                       | -0.29            | 0.013   | 0.247           |
| Cdh1                       | NM_009864                  | ref Mus musculus cadherin 1 (Cdh1), mRNA [NM_009864]                                                                                                           | -0.29            | 0.050   | 0.457           |
| Fam82a1                    | NM_201361                  | ref Mus musculus family with sequence similarity 82, member A1 (Fam82a1), mRNA [NM_201361]                                                                     | -0.29            | 0.026   | 0.338           |
| Prox1                      | NM_008937                  | ref Mus musculus prospero-related homeobox 1 (Prox1), mRNA [NM_008937]                                                                                         | -0.29            | 0.036   | 0.395           |
| 9530083O12Rik              | AK079287                   | gb Mus musculus adult male urinary bladder cDNA, RIKEN full-length enriched library, clone:9530083O12 product:unclassifiable, full insert sequence. [AK079287] | -0.29            | 0.009   | 0.198           |
| Ankle1                     | NM_172756                  | ref Mus musculus ankyrin repeat and LEM domain containing 1 (Ankle1), mRNA [NM_172756]                                                                         | -0.29            | 0.017   | 0.279           |
| Abcb7                      | NM_009592                  | ref Mus musculus ATP-binding cassette, sub-family B (MDR/TAP), member 7 (Abcb7), nuclear gene encoding mitochondrial protein, mRNA [NM_009592]                 | -0.29            | 0.006   | 0.167           |
| Hist1h2af                  | NM_175661                  | ref Mus musculus histone cluster 1, H2af (Hist1h2af), mRNA [NM_175661]                                                                                         | -0.29            | 0.013   | 0.245           |
| LOC100045917               | XM_001475176               | ref PREDICTED: Mus musculus hypothetical protein LOC100045917 (LOC100045917), mRNA [XM_001475176]                                                              | -0.29            | 0.032   | 0.372           |
| chr17:35080914-35090009_F  | chr17:35080914-35090009_F  | lincRNA:chr17:35080914-35090009 forward strand                                                                                                                 | -0.29            | 0.041   | 0.421           |
| Ndufa8                     | NM_026703                  | ref Mus musculus NADH dehydrogenase (ubiquinone) 1 alpha subcomplex, 8 (Ndufa8), nuclear gene encoding mitochondrial protein, mRNA [NM_026703]                 | -0.29            | 0.036   | 0.391           |
| Gtpbp10                    | NM_153116                  | ref Mus musculus GTP-binding protein 10 (putative) (Gtpbp10), mRNA [NM_153116]                                                                                 | -0.29            | 0.010   | 0.216           |
| Cdc42ep3                   | NM_026514                  | ref Mus musculus CDC42 effector protein (Rho GTPase binding) 3 (Cdc42ep3), mRNA [NM_026514]                                                                    | -0.29            | 0.008   | 0.194           |
| chr1:57410074-57426723_R   | chr1:57410074-57426723_R   | lincRNA:chr1:57410074-57426723 reverse strand                                                                                                                  | -0.29            | 0.040   | 0.416           |
| chr17:41231055-41249764_R  | chr17:41231055-41249764_R  | lincRNA:chr17:41231055-41249764 reverse strand                                                                                                                 | -0.29            | 0.042   | 0.424           |
| Traf2                      | NM_009422                  | ref Mus musculus TNF receptor-associated factor 2 (Traf2), mRNA [NM_009422]                                                                                    | -0.29            | 0.033   | 0.377           |

| Online Supplemental Table IV: Con-STZ Only |                            |                                                                                                                                                                        |                  |         |                 |
|--------------------------------------------|----------------------------|------------------------------------------------------------------------------------------------------------------------------------------------------------------------|------------------|---------|-----------------|
| Gene Symbol                                | RefSeq                     | Description                                                                                                                                                            | logFC<br>Con-STZ | P-value | Adj.<br>P-value |
| 2310057J16Rik                              | NM_001163749               | ref Mus musculus RIKEN cDNA 2310057J16 gene (2310057J16Rik), transcript variant 1, mRNA [NM_001163749]                                                                 | -0.29            | 0.010   | 0.209           |
| ENSMUST00000109069                         | ENSMUST00000109069         | ens Novel KRAB box and zinc finger, C2H2 type domain containing protein [Source:UniProtKB/TrEMBL;Acc:A2ARW3] [ENSMUST00000109069]                                      | -0.30            | 0.027   | 0.346           |
| Pdp1                                       | NM_001098230               | ref Mus musculus pyruvate dehydrogenase phosphatase catalytic subunit 1 (Pdp1), nuclear gene encoding mitochondrial protein, transcript variant 2, mRNA [NM_001098230] | -0.30            | 0.004   | 0.135           |
| chr5:33788271-33788845_R                   | chr5:33788271-33788845_R   | lincRNA:chr5:33788271-33788845 reverse strand                                                                                                                          | -0.30            | 0.009   | 0.200           |
| Larp1b                                     | NM_001040399               | ref Mus musculus La ribonucleoprotein domain family, member 1B (Larp1b), mRNA [NM_001040399]                                                                           | -0.30            | 0.003   | 0.110           |
| Foxs1                                      | NM_010226                  | ref Mus musculus forkhead box S1 (Foxs1), mRNA [NM_010226]                                                                                                             | -0.30            | 0.027   | 0.348           |
| Tcf3                                       | NM_011548                  | ref Mus musculus transcription factor 3 (Tcf3), transcript variant 8, mRNA [NM_011548]                                                                                 | -0.30            | 0.023   | 0.321           |
| Wdr35                                      | NM_172470                  | ref Mus musculus WD repeat domain 35 (Wdr35), transcript variant 1, mRNA [NM_172470]                                                                                   | -0.30            | 0.003   | 0.119           |
| Suox                                       | NM_173733                  | ref Mus musculus sulfite oxidase (Suox), nuclear gene encoding mitochondrial protein, mRNA [NM_173733]                                                                 | -0.30            | 0.004   | 0.135           |
| Gnb4                                       | NM_013531                  | ref Mus musculus guanine nucleotide binding protein (G protein), beta 4 (Gnb4), mRNA [NM_013531]                                                                       | -0.30            | 0.025   | 0.334           |
| Mrpl34                                     | NM_053162                  | ref Mus musculus mitochondrial ribosomal protein L34 (Mrpl34), nuclear gene encoding mitochondrial protein, mRNA [NM_053162]                                           | -0.30            | 0.023   | 0.317           |
| St3gal3                                    | NM_009176                  | ref Mus musculus ST3 beta-galactoside alpha-2,3-sialyltransferase 3 (St3gal3), transcript variant 1, mRNA [NM_009176]                                                  | -0.30            | 0.004   | 0.137           |
| ENSMUST00000109618                         | ENSMUST00000109618         | ens centrosomal protein 250 Gene [Source:MGI (curated);Acc:MGI:108084] [ENSMUST00000109618]                                                                            | -0.30            | 0.025   | 0.330           |
| chr9:41422319-41425855_F                   | chr9:41422319-41425855_F   | lincRNA:chr9:41422319-41425855 forward strand                                                                                                                          | -0.30            | 0.030   | 0.364           |
| chr4:155585650-155608700_R                 | chr4:155585650-155608700_R | lincRNA:chr4:155585650-155608700 reverse strand                                                                                                                        | -0.30            | 0.028   | 0.352           |
| Vps45                                      | NM_013841                  | ref Mus musculus vacuolar protein sorting 45 (yeast) (Vps45), mRNA [NM_013841]                                                                                         | -0.30            | 0.046   | 0.443           |
| chr11:97275905-97310538_F                  | chr11:97275905-97310538_F  | lincRNA:chr11:97275905-97310538 forward strand                                                                                                                         | -0.30            | 0.026   | 0.335           |
| Pnpt1                                      | NM_027869                  | ref Mus musculus polyribonucleotide nucleotidyltransferase 1 (Pnpt1), mRNA [NM_027869]                                                                                 | -0.30            | 0.003   | 0.114           |
| D14Ert668e                                 | BC030186                   | gb Mus musculus DNA segment, Chr 14, ERATO Doi 668, expressed, mRNA (cDNA clone MGC:29273 IMAGE:5067268), complete cds. [BC030186]                                     | -0.30            | 0.038   | 0.406           |
| Gnb1l                                      | NM_001081682               | ref Mus musculus guanine nucleotide binding protein (G protein), beta polypeptide 1-like (Gnb1l), transcript variant 1, mRNA [NM_001081682]                            | -0.30            | 0.035   | 0.390           |
| LOC100045065                               | XM_001473977               | ref PREDICTED: Mus musculus similar to hCG1978856 (LOC100045065), mRNA [XM_001473977]                                                                                  | -0.30            | 0.013   | 0.242           |
| Zmat5                                      | NM_026015                  | ref Mus musculus zinc finger, matrin type 5 (Zmat5), mRNA [NM_026015]                                                                                                  | -0.30            | 0.034   | 0.384           |
| Vamp3                                      | NM_009498                  | ref Mus musculus vesicle-associated membrane protein 3 (Vamp3), mRNA [NM_009498]                                                                                       | -0.30            | 0.004   | 0.129           |
| Inpp1                                      | NM_010567                  | ref Mus musculus inositol polyphosphate phosphatase-like 1 (Inpp1), transcript variant 1, mRNA [NM_010567]                                                             | -0.30            | 0.018   | 0.283           |
| AK129341                                   | NM_001045524               | ref Mus musculus cDNA sequence AK129341 (AK129341), mRNA [NM_001045524]                                                                                                | -0.30            | 0.035   | 0.387           |
| Gm4773                                     | XR_032681                  | ref PREDICTED: Mus musculus similar to prohibitin (LOC211705), misc RNA [XR_032681]                                                                                    | -0.30            | 0.010   | 0.208           |
| Actr3b                                     | NM_001004365               | ref Mus musculus ARP3 actin-related protein 3 homolog B (yeast) (Actr3b), mRNA [NM_001004365]                                                                          | -0.30            | 0.025   | 0.332           |

| Online Supplemental Table IV: Con-STZ Only |                             |                                                                                                                                                                |                  |         |                 |
|--------------------------------------------|-----------------------------|----------------------------------------------------------------------------------------------------------------------------------------------------------------|------------------|---------|-----------------|
| Gene Symbol                                | RefSeq                      | Description                                                                                                                                                    | logFC<br>Con-STZ | P-value | Adj.<br>P-value |
| chr17:35080914-35090009_F                  | chr17:35080914-35090009_F   | lincRNA:chr17:35080914-35090009 forward strand                                                                                                                 | -0.30            | 0.038   | 0.403           |
| Inpp5e                                     | NM_033134                   | ref Mus musculus inositol polyphosphate-5-phosphatase E (Inpp5e), mRNA [NM_033134]                                                                             | -0.30            | 0.020   | 0.297           |
| chr18:47313842-47315840_F                  | chr18:47313842-47315840_F   | lincRNA:chr18:47313842-47315840 forward strand                                                                                                                 | -0.30            | 0.015   | 0.263           |
| Usp11                                      | NM_145628                   | ref Mus musculus ubiquitin specific peptidase 11 (Usp11), mRNA [NM_145628]                                                                                     | -0.30            | 0.025   | 0.331           |
| C030046G05                                 | AK081287                    | gb Mus musculus adult male corpus striatum cDNA, RIKEN full-length enriched library, clone:C030046G05 product:unclassifiable, full insert sequence. [AK081287] | -0.30            | 0.008   | 0.192           |
| Pnpt1                                      | NM_027869                   | ref Mus musculus polynucleotide nucleotidyltransferase 1 (Pnpt1), mRNA [NM_027869]                                                                             | -0.30            | 0.004   | 0.142           |
| Serpnb8                                    | NM_011459                   | ref Mus musculus serine (or cysteine) peptidase inhibitor, clade B, member 8 (Serpnb8), transcript variant 1, mRNA [NM_011459]                                 | -0.30            | 0.009   | 0.200           |
| Srp19                                      | NM_025527                   | ref Mus musculus signal recognition particle 19 (Srp19), mRNA [NM_025527]                                                                                      | -0.30            | 0.016   | 0.273           |
| Gm11658                                    | XR_031894                   | ref PREDICTED: Mus musculus similar to LOC654472 protein (LOC194985), misc RNA [XR_031894]                                                                     | -0.30            | 0.005   | 0.150           |
| Lass4                                      | NM_026058                   | ref Mus musculus LAG1 homolog, ceramide synthase 4 (Lass4), mRNA [NM_026058]                                                                                   | -0.30            | 0.005   | 0.154           |
| ENSMUST00000118576                         | ENSMUST00000118576          | ens coiled-coil domain containing 64 Gene [Source:MGI (curated);Acc:MGI:1922915] [ENSMUST00000118576]                                                          | -0.30            | 0.009   | 0.196           |
| Dlst                                       | NM_030225                   | ref Mus musculus dihydrolipoamide S-succinyltransferase (E2 component of 2-oxo-glutarate complex) (Dlst), mRNA [NM_030225]                                     | -0.30            | 0.002   | 0.102           |
| Magef1                                     | XR_005142                   | ref PREDICTED: Mus musculus RIKEN cDNA 6430590I03 gene (6430590I03Rik), misc RNA [XR_005142]                                                                   | -0.30            | 0.007   | 0.181           |
| ENSMUST00000079338                         | ENSMUST00000079338          | ens SH3/ankyrin domain gene 1 Gene [Source:MGI (curated);Acc:MGI:3613677] [ENSMUST00000079338]                                                                 | -0.30            | 0.040   | 0.415           |
| Masp2                                      | NM_001003893                | ref Mus musculus mannan-binding lectin serine peptidase 2 (Masp2), transcript variant 1, mRNA [NM_001003893]                                                   | -0.30            | 0.028   | 0.351           |
| Pfkm                                       | NM_021514                   | ref Mus musculus phosphofructokinase, muscle (Pfkm), transcript variant 2, mRNA [NM_021514]                                                                    | -0.30            | 0.008   | 0.187           |
| Zfp367                                     | NM_175494                   | ref Mus musculus zinc finger protein 367 (Zfp367), mRNA [NM_175494]                                                                                            | -0.30            | 0.005   | 0.154           |
| chr14:21029450-21049451_R                  | chr14:21029450-21049451_R   | lincRNA:chr14:21029450-21049451 reverse strand                                                                                                                 | -0.30            | 0.026   | 0.338           |
| Armcl                                      | NM_028840                   | ref Mus musculus armadillo repeat containing 1 (Armcl), mRNA [NM_028840]                                                                                       | -0.30            | 0.029   | 0.354           |
| chr10:120116843-120182671_F                | chr10:120116843-120182671_F | lincRNA:chr10:120116843-120182671 forward strand                                                                                                               | -0.30            | 0.034   | 0.382           |
| chr8:70623390-70645212_R                   | chr8:70623390-70645212_R    | lincRNA:chr8:70623390-70645212 reverse strand                                                                                                                  | -0.30            | 0.029   | 0.354           |
| Atg4d                                      | NM_153583                   | ref Mus musculus autophagy-related 4D (yeast) (Atg4d), mRNA [NM_153583]                                                                                        | -0.30            | 0.024   | 0.326           |
| chr2:104657075-104658840_F                 | chr2:104657075-104658840_F  | lincRNA:chr2:104657075-104658840 forward strand                                                                                                                | -0.30            | 0.037   | 0.399           |
| Tmem184a                                   | NM_001161548                | ref Mus musculus transmembrane protein 184a (Tmem184a), transcript variant 1, mRNA [NM_001161548]                                                              | -0.31            | 0.030   | 0.360           |
| Mpdz                                       | NM_010820                   | ref Mus musculus multiple PDZ domain protein (Mpdz), mRNA [NM_010820]                                                                                          | -0.31            | 0.015   | 0.264           |
| 8430419L09Rik                              | NM_028982                   | ref Mus musculus RIKEN cDNA 8430419L09 gene (8430419L09Rik), mRNA [NM_028982]                                                                                  | -0.31            | 0.005   | 0.148           |
| 2310016G11Rik                              | ENSMUST00000094460          | ens RIKEN cDNA 2310016G11 gene Gene [Source:MGI Symbol;Acc:MGI:1916828] [ENSMUST00000094460]                                                                   | -0.31            | 0.043   | 0.430           |
| Tnfrsf9                                    | NM_011612                   | ref Mus musculus tumor necrosis factor receptor superfamily, member 9 (Tnfrsf9), transcript variant 1, mRNA [NM_011612]                                        | -0.31            | 0.009   | 0.199           |

Online Supplemental Table IV: Con-STZ Only

| Gene Symbol                | RefSeq                     | Description                                                                                                                  | logFC<br>Con-STZ | P-value | Adj.<br>P-value |
|----------------------------|----------------------------|------------------------------------------------------------------------------------------------------------------------------|------------------|---------|-----------------|
| Extl2                      | NM_021388                  | ref Mus musculus exostoses (multiple)-like 2 (Extl2), transcript variant 1, mRNA [NM_021388]                                 | -0.31            | 0.004   | 0.130           |
| chr17:15357376-15385701_F  | chr17:15357376-15385701_F  | lincRNA:chr17:15357376-15385701 forward strand                                                                               | -0.31            | 0.041   | 0.422           |
| chr8:24327427-24332452_R   | chr8:24327427-24332452_R   | lincRNA:chr8:24327427-24332452 reverse strand                                                                                | -0.31            | 0.026   | 0.335           |
| Uros                       | NM_009479                  | ref Mus musculus uroporphyrinogen III synthase (Uros), mRNA [NM_009479]                                                      | -0.31            | 0.035   | 0.390           |
| Fgfr1op2                   | NM_026218                  | ref Mus musculus FGFR1 oncogene partner 2 (Fgfr1op2), mRNA [NM_026218]                                                       | -0.31            | 0.014   | 0.249           |
| ENSMUST00000037174         | ENSMUST00000037174         | ens nebullette Gene [Source:MGI (curated);Acc:MGI:1921353] [ENSMUST00000037174]                                              | -0.31            | 0.006   | 0.167           |
| Nt5c1a                     | NM_001085502               | ref Mus musculus 5'-nucleotidase, cytosolic 1A (Nt5c1a), mRNA [NM_001085502]                                                 | -0.31            | 0.017   | 0.279           |
| Gm14008                    | XR_034868                  | ref PREDICTED: Mus musculus similar to high mobility group nucleosomal binding domain 2 (LOC100043730), misc RNA [XR_034868] | -0.31            | 0.005   | 0.154           |
| Adi1                       | NM_134052                  | ref Mus musculus acireductone dioxygenase 1 (Adi1), mRNA [NM_134052]                                                         | -0.31            | 0.008   | 0.190           |
| Ctcf1                      | NM_001081387               | ref Mus musculus CCCTC-binding factor (zinc finger protein)-like (Ctcf1), mRNA [NM_001081387]                                | -0.31            | 0.046   | 0.444           |
| Tnnc2                      | NM_009394                  | ref Mus musculus troponin C2, fast (Tnnc2), mRNA [NM_009394]                                                                 | -0.31            | 0.023   | 0.322           |
| Bbs7                       | NM_027810                  | ref Mus musculus Bardet-Biedl syndrome 7 (human) (Bbs7), mRNA [NM_027810]                                                    | -0.31            | 0.022   | 0.314           |
| chr6:31555210-31693051_F   | chr6:31555210-31693051_F   | lincRNA:chr6:31555210-31693051 forward strand                                                                                | -0.31            | 0.013   | 0.239           |
| chr1:135830093-135840837_F | chr1:135830093-135840837_F | lincRNA:chr1:135830093-135840837 forward strand                                                                              | -0.31            | 0.030   | 0.362           |
| AI597479                   | NM_133818                  | ref Mus musculus expressed sequence AI597479 (AI597479), mRNA [NM_133818]                                                    | -0.31            | 0.007   | 0.171           |
| Oraov1                     | NM_028184                  | ref Mus musculus oral cancer overexpressed 1 (Oraov1), mRNA [NM_028184]                                                      | -0.31            | 0.012   | 0.233           |
| Mitf                       | NM_001113198               | ref Mus musculus microphthalmia-associated transcription factor (Mitf), transcript variant 1, mRNA [NM_001113198]            | -0.31            | 0.033   | 0.380           |
| Fam54b                     | NM_029759                  | ref Mus musculus family with sequence similarity 54, member B (Fam54b), mRNA [NM_029759]                                     | -0.31            | 0.015   | 0.263           |
| Prkab1                     | NM_031869                  | ref Mus musculus protein kinase, AMP-activated, beta 1 non-catalytic subunit (Prkab1), mRNA [NM_031869]                      | -0.31            | 0.013   | 0.242           |
| Prkab2                     | NM_182997                  | ref Mus musculus protein kinase, AMP-activated, beta 2 non-catalytic subunit (Prkab2), mRNA [NM_182997]                      | -0.31            | 0.019   | 0.288           |
| A530064D06Rik              | NM_178796                  | ref Mus musculus RIKEN cDNA A530064D06 gene (A530064D06Rik), transcript variant 1, mRNA [NM_178796]                          | -0.31            | 0.003   | 0.117           |
| chr12:73838608-73862621_R  | chr12:73838608-73862621_R  | lincRNA:chr12:73838608-73862621 reverse strand                                                                               | -0.31            | 0.024   | 0.328           |
| ENSMUST00000114093         | ENSMUST00000114093         | ens peptidase (mitochondrial processing) alpha Gene [Source:MGI (curated);Acc:MGI:1918568] [ENSMUST00000114093]              | -0.31            | 0.015   | 0.260           |
| chr12:3406750-3425850_R    | chr12:3406750-3425850_R    | lincRNA:chr12:3406750-3425850 reverse strand                                                                                 | -0.31            | 0.022   | 0.310           |
| Lzic                       | NM_026963                  | ref Mus musculus leucine zipper and CTNNBIP1 domain containing (Lzic), mRNA [NM_026963]                                      | -0.31            | 0.010   | 0.211           |
| Siglecg                    | NM_172900                  | ref Mus musculus sialic acid binding Ig-like lectin G (Siglecg), mRNA [NM_172900]                                            | -0.31            | 0.048   | 0.452           |
| Olf986                     | NM_146615                  | ref Mus musculus olfactory receptor 986 (Olf986), mRNA [NM_146615]                                                           | -0.31            | 0.022   | 0.316           |
| chr13:41337973-41379821_R  | chr13:41337973-41379821_R  | lincRNA:chr13:41337973-41379821 reverse strand                                                                               | -0.31            | 0.024   | 0.327           |
| Ptprn2                     | NM_011215                  | ref Mus musculus protein tyrosine phosphatase, receptor type, N polypeptide 2 (Ptprn2), mRNA [NM_011215]                     | -0.31            | 0.028   | 0.351           |

Online Supplemental Table IV: Con-STZ Only

| Gene Symbol                 | RefSeq                      | Description                                                                                                                                                                                         | logFC<br>Con-STZ | P-value | Adj.<br>P-value |
|-----------------------------|-----------------------------|-----------------------------------------------------------------------------------------------------------------------------------------------------------------------------------------------------|------------------|---------|-----------------|
| Laptn4b                     | NM_033521                   | ref Mus musculus lysosomal-associated protein transmembrane 4B (Laptn4b), mRNA [NM_033521]                                                                                                          | -0.31            | 0.002   | 0.096           |
| chr6:92040526-92041319_F    | chr6:92040526-92041319_F    | lincRNA:chr6:92040526-92041319 forward strand                                                                                                                                                       | -0.31            | 0.012   | 0.236           |
| Gm9620                      | XR_033292                   | ref PREDICTED: Mus musculus hypothetical LOC674332 (LOC674332), misc RNA [XR_033292]                                                                                                                | -0.31            | 0.039   | 0.411           |
| Hnmt                        | NM_080462                   | ref Mus musculus histamine N-methyltransferase (Hnmt), mRNA [NM_080462]                                                                                                                             | -0.31            | 0.024   | 0.323           |
| chr7:86661031-86661558_F    | chr7:86661031-86661558_F    | lincRNA:chr7:86661031-86661558 forward strand                                                                                                                                                       | -0.31            | 0.037   | 0.399           |
| Gm6660                      | XR_030541                   | ref PREDICTED: Mus musculus similar to Xlr-like (LOC626274), misc RNA [XR_030541]                                                                                                                   | -0.31            | 0.040   | 0.416           |
| 1110008J03Rik               | NM_029096                   | ref Mus musculus RIKEN cDNA 1110008J03 gene (1110008J03Rik), mRNA [NM_029096]                                                                                                                       | -0.31            | 0.018   | 0.283           |
| Telo2                       | NM_001163661                | ref Mus musculus TEL2, telomere maintenance 2, homolog (S. cerevisiae) (Telo2), transcript variant 1, mRNA [NM_001163661]                                                                           | -0.31            | 0.040   | 0.414           |
| Gm2383                      | XR_031176                   | ref PREDICTED: Mus musculus similar to Glyceraldehyde-3-phosphate dehydrogenase (GAPDH) (LOC100039709), misc RNA [XR_031176]                                                                        | -0.31            | 0.003   | 0.107           |
| Spata2L                     | NM_030176                   | ref Mus musculus spermatogenesis associated 2-like (Spata2L), mRNA [NM_030176]                                                                                                                      | -0.31            | 0.048   | 0.449           |
| Gm12251                     | XM_889356                   | ref PREDICTED: Mus musculus similar to NADH dehydrogenase (ubiquinone) Fe-S protein 3 (LOC624814), mRNA [XM_889356]                                                                                 | -0.32            | 0.046   | 0.444           |
| Pmvk                        | NM_026784                   | ref Mus musculus phosphomevalonate kinase (Pmvk), transcript variant 1, mRNA [NM_026784]                                                                                                            | -0.32            | 0.003   | 0.124           |
| 4930579G24Rik               | AK137776                    | gb Mus musculus 16 days neonate thymus cDNA, RIKEN full-length enriched library, clone:A130004M03 product: survivor of motor neuron protein interacting protein 1, full insert sequence. [AK137776] | -0.32            | 0.048   | 0.452           |
| chr13:114514159-114514765_R | chr13:114514159-114514765_R | lincRNA:chr13:114514159-114514765 reverse strand                                                                                                                                                    | -0.32            | 0.010   | 0.207           |
| chr13:28506971-28511732_R   | chr13:28506971-28511732_R   | lincRNA:chr13:28506971-28511732 reverse strand                                                                                                                                                      | -0.32            | 0.038   | 0.402           |
| Cdc25a                      | NM_007658                   | ref Mus musculus cell division cycle 25 homolog A (S. pombe) (Cdc25a), mRNA [NM_007658]                                                                                                             | -0.32            | 0.027   | 0.343           |
| LOC100047861                | XM_001478901                | ref PREDICTED: Mus musculus similar to hCG2019757 (LOC100047861), mRNA [XM_001478901]                                                                                                               | -0.32            | 0.009   | 0.199           |
| Gfm1                        | NM_138591                   | ref Mus musculus G elongation factor, mitochondrial 1 (Gfm1), nuclear gene encoding mitochondrial protein, mRNA [NM_138591]                                                                         | -0.32            | 0.011   | 0.216           |
| Aspdh                       | NM_026690                   | ref Mus musculus aspartate dehydrogenase domain containing (Aspdh), mRNA [NM_026690]                                                                                                                | -0.32            | 0.021   | 0.306           |
| ENSMUST00000063608          | ENSMUST00000063608          | ens RIKEN cDNA A530006G24 gene Gene [Source:MGI Symbol;Acc:MGI:2685849] [ENSMUST00000063608]                                                                                                        | -0.32            | 0.009   | 0.197           |
| Golga7b                     | NM_001141983                | ref Mus musculus golgi autoantigen, golgin subfamily a, 7B (Golga7b), transcript variant 1, mRNA [NM_001141983]                                                                                     | -0.32            | 0.043   | 0.429           |
| D830039M14Rik               | XR_035204                   | ref PREDICTED: Mus musculus RIKEN cDNA D830039M14 gene (D830039M14Rik), misc RNA [XR_035204]                                                                                                        | -0.32            | 0.015   | 0.266           |
| Ormdl1                      | NM_145517                   | ref Mus musculus ORM1-like 1 (S. cerevisiae) (Ormdl1), mRNA [NM_145517]                                                                                                                             | -0.32            | 0.007   | 0.179           |
| Gm13154                     | NM_001014397                | ref Mus musculus predicted gene 13154 (Gm13154), mRNA [NM_001014397]                                                                                                                                | -0.32            | 0.021   | 0.306           |
| Creg2                       | NM_170597                   | ref Mus musculus cellular repressor of E1A-stimulated genes 2 (Creg2), mRNA [NM_170597]                                                                                                             | -0.32            | 0.025   | 0.332           |
| Upf3b                       | NM_026573                   | ref Mus musculus UPF3 regulator of nonsense transcripts homolog B (yeast) (Upf3b), mRNA [NM_026573]                                                                                                 | -0.32            | 0.010   | 0.214           |
| Gpr183                      | NM_183031                   | ref Mus musculus G protein-coupled receptor 183 (Gpr183), mRNA [NM_183031]                                                                                                                          | -0.32            | 0.028   | 0.349           |



Online Supplemental Table IV: Con-STZ Only

| Gene Symbol                     | RefSeq                   | Description                                                                                                                   | logFC<br>Con-STZ | P-value | Adj.<br>P-value |
|---------------------------------|--------------------------|-------------------------------------------------------------------------------------------------------------------------------|------------------|---------|-----------------|
| <b>Myl1</b>                     | NM_021285                | ref Mus musculus myosin, light polypeptide 1 (Myl1), transcript variant 1f, mRNA [NM_021285]                                  | -0.32            | 0.043   | 0.428           |
| <b>Pmm2</b>                     | NM_016881                | ref Mus musculus phosphomannomutase 2 (Pmm2), mRNA [NM_016881]                                                                | -0.32            | 0.003   | 0.113           |
| <b>ENSMUST00000112270</b>       | ENSMUST00000112270       | ens tetraicopeptide repeat domain 7 Gene [Source:MGI (curated);Acc:MGI:1920999] [ENSMUST00000112270]                          | -0.32            | 0.023   | 0.318           |
| <b>4930402E16Rik</b>            | NM_198308                | ref Mus musculus RIKEN cDNA 4930402E16 gene (4930402E16Rik), mRNA [NM_198308]                                                 | -0.32            | 0.034   | 0.385           |
| <b>Mtss1</b>                    | NM_144800                | ref Mus musculus metastasis suppressor 1 (Mtss1), transcript variant 1, mRNA [NM_144800]                                      | -0.32            | 0.032   | 0.372           |
| <b>Dtx3l</b>                    | NM_001013371             | ref Mus musculus dextex 3-like (Drosophila) (Dtx3l), mRNA [NM_001013371]                                                      | -0.32            | 0.033   | 0.376           |
| <b>Pppde2</b>                   | NM_134095                | ref Mus musculus PPPDE peptidase domain containing 2 (Pppde2), mRNA [NM_134095]                                               | -0.32            | 0.004   | 0.130           |
| <b>Mef2a</b>                    | NM_001033713             | ref Mus musculus myocyte enhancer factor 2A (Mef2a), mRNA [NM_001033713]                                                      | -0.32            | 0.004   | 0.127           |
| <b>Tmem50b</b>                  | NM_030018                | ref Mus musculus transmembrane protein 50B (Tmem50b), mRNA [NM_030018]                                                        | -0.32            | 0.018   | 0.287           |
| <b>Aga</b>                      | NM_001005847             | ref Mus musculus aspartylglucosaminidase (Aga), mRNA [NM_001005847]                                                           | -0.32            | 0.015   | 0.264           |
| <b>ENSMUST00000098612</b>       | ENSMUST00000098612       | ens Putative uncharacterized protein [Source:UniProtKB/TrEMBL;Acc:Q3UEY6] [ENSMUST00000098612]                                | -0.32            | 0.017   | 0.279           |
| <b>Ccnj</b>                     | NM_172839                | ref Mus musculus cyclin J (Ccnj), mRNA [NM_172839]                                                                            | -0.32            | 0.012   | 0.238           |
| <b>Map3k4</b>                   | NM_011948                | ref Mus musculus mitogen-activated protein kinase kinase kinase 4 (Map3k4), mRNA [NM_011948]                                  | -0.32            | 0.004   | 0.130           |
| <b>Sox12</b>                    | NM_011438                | ref Mus musculus SRY-box containing gene 12 (Sox12), mRNA [NM_011438]                                                         | -0.32            | 0.023   | 0.321           |
| <b>4930544O15Rik</b>            | NM_029196                | ref Mus musculus RIKEN cDNA 4930544O15 gene (4930544O15Rik), mRNA [NM_029196]                                                 | -0.32            | 0.015   | 0.259           |
| <b>ENSMUST00000110075</b>       | ENSMUST00000110075       | ref PREDICTED: Mus musculus similar to ankyrin repeat domain 26 (LOC665858), mRNA [XM_001476565]                              | -0.32            | 0.034   | 0.385           |
| <b>Gm3711</b>                   | XR_033357                | ref PREDICTED: Mus musculus similar to Zbed4 protein (LOC100042188), misc RNA [XR_033357]                                     | -0.32            | 0.048   | 0.452           |
| <b>Trappc5</b>                  | NM_025701                | ref Mus musculus trafficking protein particle complex 5 (Trappc5), mRNA [NM_025701]                                           | -0.32            | 0.002   | 0.094           |
| <b>Nkiras1</b>                  | NM_023526                | ref Mus musculus NFKB inhibitor interacting Ras-like protein 1 (Nkiras1), mRNA [NM_023526]                                    | -0.32            | 0.010   | 0.212           |
| <b>Fgfr1l</b>                   | NM_054071                | ref Mus musculus fibroblast growth factor receptor-like 1 (Fgfr1l), transcript variant 1, mRNA [NM_054071]                    | -0.32            | 0.012   | 0.231           |
| <b>Gm2657</b>                   | XM_001474254             | ref PREDICTED: Mus musculus similar to Ac2-210 (LOC100040198), mRNA [XM_001474254]                                            | -0.32            | 0.027   | 0.344           |
| <b>Myl1</b>                     | NM_001113387             | ref Mus musculus myosin, light polypeptide 1 (Myl1), transcript variant 3f, mRNA [NM_001113387]                               | -0.32            | 0.035   | 0.387           |
| <b>chr2:59235155-59242518_F</b> | chr2:59235155-59242518_F | lincRNA:chr2:59235155-59242518 forward strand                                                                                 | -0.32            | 0.037   | 0.398           |
| <b>Adra1d</b>                   | NM_013460                | ref Mus musculus adrenergic receptor, alpha 1d (Adra1d), mRNA [NM_013460]                                                     | -0.32            | 0.021   | 0.306           |
| <b>Pacsin2</b>                  | NM_011862                | ref Mus musculus protein kinase C and casein kinase substrate in neurons 2 (Pacsin2), transcript variant 1, mRNA [NM_011862]  | -0.32            | 0.043   | 0.428           |
| <b>Dip2b</b>                    | NM_001159361             | ref Mus musculus DIP2 disco-interacting protein 2 homolog B (Drosophila) (Dip2b), transcript variant 1, mRNA [NM_001159361]   | -0.32            | 0.005   | 0.155           |
| <b>Rprl2</b>                    | NR_004439                | ref Mus musculus ribonuclease P RNA-like 2 (Rprl2), RNase P RNA [NR_004439]                                                   | -0.32            | 0.012   | 0.234           |
| <b>ENSMUST00000108845</b>       | ENSMUST00000108845       | ens heart and neural crest derivatives expressed transcript 1 Gene [Source:MGI (curated);Acc:MGI:103577] [ENSMUST00000108845] | -0.32            | 0.015   | 0.262           |
| <b>Gm2124</b>                   | XR_030770                | ref PREDICTED: Mus musculus similar to M2-type pyruvate kinase (LOC100039264), misc RNA [XR_030770]                           | -0.32            | 0.004   | 0.135           |

| Online Supplemental Table IV: Con-STZ Only |                           |                                                                                                                                                      |                  |         |                 |
|--------------------------------------------|---------------------------|------------------------------------------------------------------------------------------------------------------------------------------------------|------------------|---------|-----------------|
| Gene Symbol                                | RefSeq                    | Description                                                                                                                                          | logFC<br>Con-STZ | P-value | Adj.<br>P-value |
| Rnase13                                    | NM_001011687              | ref Mus musculus ribonuclease, RNase A family, 13 (non-active) (Rnase13), mRNA [NM_001011687]                                                        | -0.32            | 0.041   | 0.418           |
| Sc5d                                       | NM_172769                 | ref Mus musculus sterol-C5-desaturase (fungal ERG3, delta-5-desaturase) homolog (S. cerevisiae) (Sc5d), mRNA [NM_172769]                             | -0.32            | 0.006   | 0.170           |
| X99384                                     | NM_013753                 | ref Mus musculus cDNA sequence X99384 (X99384), mRNA [NM_013753]                                                                                     | -0.32            | 0.005   | 0.156           |
| ENSMUST00000098030                         | ENSMUST00000098030        | ens regulator of G-protein signaling 3 Gene [Source:MGI (curated);Acc:MGI:1354734] [ENSMUST00000098030]                                              | -0.33            | 0.026   | 0.338           |
| Gm6994                                     | NR_033141                 | ref Mus musculus predicted gene 6994 (Gm6994), non-coding RNA [NR_033141]                                                                            | -0.33            | 0.002   | 0.092           |
| Rnmtl1                                     | NM_183263                 | ref Mus musculus RNA methyltransferase like 1 (Rnmtl1), mRNA [NM_183263]                                                                             | -0.33            | 0.006   | 0.167           |
| Rwdd2b                                     | NM_016924                 | ref Mus musculus RWD domain containing 2B (Rwdd2b), mRNA [NM_016924]                                                                                 | -0.33            | 0.011   | 0.220           |
| Gm11992                                    | NM_001037928              | ref Mus musculus predicted gene 11992 (Gm11992), mRNA [NM_001037928]                                                                                 | -0.33            | 0.034   | 0.385           |
| Zfp763                                     | NM_028543                 | ref Mus musculus zinc finger protein 763 (Zfp763), mRNA [NM_028543]                                                                                  | -0.33            | 0.018   | 0.284           |
| Cntnap2                                    | NM_001004357              | ref Mus musculus contactin associated protein-like 2 (Cntnap2), transcript variant 1, mRNA [NM_001004357]                                            | -0.33            | 0.035   | 0.387           |
| 2410127L17Rik                              | NM_026120                 | ref Mus musculus RIKEN cDNA 2410127L17 gene (2410127L17Rik), mRNA [NM_026120]                                                                        | -0.33            | 0.004   | 0.138           |
| Gm7792                                     | XM_981891                 | ref PREDICTED: Mus musculus predicted gene, EG665802, transcript variant 6 (EG665802), mRNA [XM_981891]                                              | -0.33            | 0.028   | 0.351           |
| Hnmt                                       | NM_080462                 | ref Mus musculus histamine N-methyltransferase (Hnmt), mRNA [NM_080462]                                                                              | -0.33            | 0.027   | 0.346           |
| Synj2bp                                    | NM_025292                 | ref Mus musculus synaptotagmin 2 binding protein (Synj2bp), mRNA [NM_025292]                                                                         | -0.33            | 0.012   | 0.234           |
| Msh3                                       | NM_010829                 | ref Mus musculus mutS homolog 3 (E. coli) (Msh3), mRNA [NM_010829]                                                                                   | -0.33            | 0.014   | 0.253           |
| Gm13812                                    | XR_005019                 | ref PREDICTED: Mus musculus similar to Pyruvate kinase, muscle (LOC241572), misc RNA [XR_005019]                                                     | -0.33            | 0.003   | 0.115           |
| Syt5                                       | NM_016908                 | ref Mus musculus synaptotagmin V (Syt5), mRNA [NM_016908]                                                                                            | -0.33            | 0.044   | 0.434           |
| Wnt5a                                      | NM_009524                 | ref Mus musculus wingless-related MMTV integration site 5A (Wnt5a), mRNA [NM_009524]                                                                 | -0.33            | 0.004   | 0.128           |
| chr4:98943050-98959998_R                   | chr4:98943050-98959998_R  | lincRNA:chr4:98943050-98959998 reverse strand                                                                                                        | -0.33            | 0.025   | 0.332           |
| chr17:95255725-95272425_R                  | chr17:95255725-95272425_R | lincRNA:chr17:95255725-95272425 reverse strand                                                                                                       | -0.33            | 0.005   | 0.143           |
| ENSMUST00000118651                         | ENSMUST00000118651        | ens sema domain, transmembrane domain (TM), and cytoplasmic domain, (semaphorin) 6C Gene [Source:MGI (curated);Acc:MGI:1338032] [ENSMUST00000118651] | -0.33            | 0.025   | 0.332           |
| 4930571K23Rik                              | NM_001145759              | ref Mus musculus RIKEN cDNA 4930571K23 gene (4930571K23Rik), mRNA [NM_001145759]                                                                     | -0.33            | 0.049   | 0.455           |
| LOC100045393                               | XR_031783                 | ref PREDICTED: Mus musculus similar to guanosine monophosphate reductase (LOC100045393), misc RNA [XR_031783]                                        | -0.33            | 0.009   | 0.206           |
| Dnhd1                                      | XM_983220                 | ref PREDICTED: Mus musculus dynein heavy chain domain 1 (Dnhd1), mRNA [XM_983220]                                                                    | -0.33            | 0.034   | 0.382           |
| Pde7b                                      | NM_013875                 | ref Mus musculus phosphodiesterase 7B (Pde7b), mRNA [NM_013875]                                                                                      | -0.33            | 0.026   | 0.342           |
| 1810013D10Rik                              | NM_001145433              | ref Mus musculus RIKEN cDNA 1810013D10 gene (1810013D10Rik), mRNA [NM_001145433]                                                                     | -0.33            | 0.013   | 0.242           |
| Ssbp1                                      | ENSMUST00000121360        | ens single-stranded DNA binding protein 1 Gene [Source:MGI (curated);Acc:MGI:1920040] [ENSMUST00000121360]                                           | -0.33            | 0.005   | 0.147           |
| chr15:73227424-73257474_F                  | chr15:73227424-73257474_F | lincRNA:chr15:73227424-73257474 forward strand                                                                                                       | -0.33            | 0.007   | 0.179           |

Online Supplemental Table IV: Con-STZ Only

| Gene Symbol                       | RefSeq                     | Description                                                                                                                                                       | logFC<br>Con-<br>STZ | P-value | Adj.<br>P-value |
|-----------------------------------|----------------------------|-------------------------------------------------------------------------------------------------------------------------------------------------------------------|----------------------|---------|-----------------|
| <b>ENSMUST00000044043</b>         | ENSMUST00000044043         | ens  Cytochrome c oxidase subunit 5B, mitochondrial Precursor (Cytochrome c oxidase polypeptide Vb) [Source:UniProtKB/Swiss-Prot;Acc:P19536] [ENSMUST00000044043] | -0.33                | 0.022   | 0.314           |
| <b>2810006K23Rik</b>              | NM_028310                  | ref  Mus musculus RIKEN cDNA 2810006K23 gene (2810006K23Rik), transcript variant 2, mRNA [NM_028310]                                                              | -0.33                | 0.040   | 0.415           |
| <b>Ttc19</b>                      | NM_028360                  | ref  Mus musculus tetratricopeptide repeat domain 19 (Ttc19), transcript variant 1, mRNA [NM_028360]                                                              | -0.33                | 0.024   | 0.326           |
| <b>Gm10290</b>                    | ENSMUST00000094104         | ref  PREDICTED: Mus musculus similar to Glyceraldehyde-3-phosphate dehydrogenase (GAPDH), transcript variant 1 (LOC100039258), mRNA [XM_001472531]                | -0.33                | 0.004   | 0.139           |
| <b>Isg20</b>                      | NM_020583                  | ref  Mus musculus interferon-stimulated protein (Isg20), transcript variant 1, mRNA [NM_020583]                                                                   | -0.33                | 0.002   | 0.088           |
| <b>Nrp1</b>                       | NM_008737                  | ref  Mus musculus neuropilin 1 (Nrp1), mRNA [NM_008737]                                                                                                           | -0.33                | 0.021   | 0.306           |
| <b>Gm5132</b>                     | NM_001085517               | ref  Mus musculus predicted gene 5132 (Gm5132), mRNA [NM_001085517]                                                                                               | -0.33                | 0.036   | 0.394           |
| <b>chr10:60473030-60535340_F</b>  | chr10:60473030-60535340_F  | lincRNA:chr10:60473030-60535340 forward strand                                                                                                                    | -0.33                | 0.010   | 0.212           |
| <b>LOC100047861</b>               | XM_001478901               | ref  PREDICTED: Mus musculus similar to hCG2019757 (LOC100047861), mRNA [XM_001478901]                                                                            | -0.33                | 0.010   | 0.207           |
| <b>Gm12070</b>                    | NR_002890                  | ref  Mus musculus predicted gene 12070 (Gm12070), non-coding RNA [NR_002890]                                                                                      | -0.33                | 0.002   | 0.096           |
| <b>Mrpl9</b>                      | NM_030116                  | ref  Mus musculus mitochondrial ribosomal protein L9 (Mrpl9), nuclear gene encoding mitochondrial protein, mRNA [NM_030116]                                       | -0.33                | 0.002   | 0.100           |
| <b>chr17:32213027-32228368_R</b>  | chr17:32213027-32228368_R  | lincRNA:chr17:32213027-32228368 reverse strand                                                                                                                    | -0.33                | 0.017   | 0.280           |
| <b>Dcun1d2</b>                    | NM_001024504               | ref  Mus musculus DCN1, defective in cullin neddylation 1, domain containing 2 (S. cerevisiae) (Dcun1d2), transcript variant 1, mRNA [NM_001024504]               | -0.33                | 0.044   | 0.435           |
| <b>Cda</b>                        | NM_028176                  | ref  Mus musculus cytidine deaminase (Cda), mRNA [NM_028176]                                                                                                      | -0.33                | 0.013   | 0.247           |
| <b>chr5:121768672-121772658_F</b> | chr5:121768672-121772658_F | lincRNA:chr5:121768672-121772658 forward strand                                                                                                                   | -0.33                | 0.018   | 0.286           |
| <b>Ptrf</b>                       | NM_008986                  | ref  Mus musculus polymerase I and transcript release factor (Ptrf), mRNA [NM_008986]                                                                             | -0.33                | 0.020   | 0.295           |
| <b>Myh8</b>                       | NM_177369                  | ref  Mus musculus myosin, heavy polypeptide 8, skeletal muscle, perinatal (Myh8), mRNA [NM_177369]                                                                | -0.33                | 0.034   | 0.385           |
| <b>Gnb1l</b>                      | NM_023120                  | ref  Mus musculus guanine nucleotide binding protein (G protein), beta polypeptide 1-like (Gnb1l), transcript variant 2, mRNA [NM_023120]                         | -0.33                | 0.024   | 0.329           |
| <b>chr5:111612191-111652286_F</b> | chr5:111612191-111652286_F | lincRNA:chr5:111612191-111652286 forward strand                                                                                                                   | -0.34                | 0.025   | 0.333           |
| <b>chr5:125861675-125880125_F</b> | chr5:125861675-125880125_F | lincRNA:chr5:125861675-125880125 forward strand                                                                                                                   | -0.34                | 0.043   | 0.427           |
| <b>Fam69c</b>                     | NM_173770                  | ref  Mus musculus family with sequence similarity 69, member C (Fam69c), mRNA [NM_173770]                                                                         | -0.34                | 0.042   | 0.424           |
| <b>ENSMUST00000118465</b>         | ENSMUST00000118465         | ens  guanine nucleotide binding protein (G protein), gamma 7 Gene [Source:MGI (curated);Acc:MGI:95787] [ENSMUST00000118465]                                       | -0.34                | 0.018   | 0.284           |
| <b>Ubac1</b>                      | BC021811                   | gb  Mus musculus ubiquitin associated domain containing 1, mRNA (cDNA clone MGC:30259 IMAGE:3662474), complete cds. [BC021811]                                    | -0.34                | 0.023   | 0.319           |
| <b>Psme3</b>                      | NM_011192                  | ref  Mus musculus proteasome (prosome, macropain) 28 subunit, 3 (Psme3), mRNA [NM_011192]                                                                         | -0.34                | 0.008   | 0.190           |
| <b>Celsr2</b>                     | NM_017392                  | ref  Mus musculus cadherin, EGF LAG seven-pass G-type receptor 2 (flamingo homolog, Drosophila) (Celsr2), transcript variant 1, mRNA [NM_017392]                  | -0.34                | 0.027   | 0.343           |
| <b>0610012G03Rik</b>              | NR_027897                  | ref  Mus musculus RIKEN cDNA 0610012G03 gene (0610012G03Rik), non-coding RNA [NR_027897]                                                                          | -0.34                | 0.017   | 0.274           |

Online Supplemental Table IV: Con-STZ Only

| Gene Symbol               | RefSeq                    | Description                                                                                                                                                            | logFC<br>Con-STZ | P-value | Adj.<br>P-value |
|---------------------------|---------------------------|------------------------------------------------------------------------------------------------------------------------------------------------------------------------|------------------|---------|-----------------|
| ENSMUST00000103356        | ENSMUST00000103356        | gb Mus musculus immunoglobulin kappa light chain, variable region mRNA, clone BALB/c-26, partial cds. [U18569]                                                         | -0.34            | 0.048   | 0.452           |
| ENSMUST00000005281        | ENSMUST00000005281        | ens WD repeat domain containing 83 Gene [Source:MGI Symbol;Acc:MGI:1915086] [ENSMUST00000005281]                                                                       | -0.34            | 0.022   | 0.316           |
| Klra16                    | NM_013794                 | ref Mus musculus killer cell lectin-like receptor, subfamily A, member 16 (Klra16), mRNA [NM_013794]                                                                   | -0.34            | 0.025   | 0.334           |
| chr2:25182970-25188091_R  | chr2:25182970-25188091_R  | lincRNA:chr2:25182970-25188091 reverse strand                                                                                                                          | -0.34            | 0.048   | 0.451           |
| Snora74a                  | NR_002905                 | ref Mus musculus small nucleolar RNA, H/ACA box 74A (Snora74a), small nucleolar RNA [NR_002905]                                                                        | -0.34            | 0.019   | 0.287           |
| chr16:31321192-31333486_R | chr16:31321192-31333486_R | lincRNA:chr16:31321192-31333486 reverse strand                                                                                                                         | -0.34            | 0.049   | 0.452           |
| 2810422O20Rik             | NM_027279                 | ref Mus musculus RIKEN cDNA 2810422O20 gene (2810422O20Rik), mRNA [NM_027279]                                                                                          | -0.34            | 0.004   | 0.136           |
| Pdrg1                     | NM_178939                 | ref Mus musculus p53 and DNA damage regulated 1 (Pdrg1), mRNA [NM_178939]                                                                                              | -0.34            | 0.006   | 0.160           |
| Galnt10                   | NM_134189                 | ref Mus musculus UDP-N-acetyl-alpha-D-galactosamine:polypeptide N-acetylgalactosaminyltransferase 10 (Galnt10), mRNA [NM_134189]                                       | -0.34            | 0.022   | 0.316           |
| 1700088E04Rik             | NM_138581                 | ref Mus musculus RIKEN cDNA 1700088E04 gene (1700088E04Rik), mRNA [NM_138581]                                                                                          | -0.34            | 0.004   | 0.129           |
| chr15:79709500-79714700_F | chr15:79709500-79714700_F | lincRNA:chr15:79709500-79714700 forward strand                                                                                                                         | -0.34            | 0.018   | 0.285           |
| Plekha8                   | NM_001164361              | ref Mus musculus pleckstrin homology domain containing, family A (phosphoinositide binding specific) member 8 (Plekha8), transcript variant 1, mRNA [NM_001164361]     | -0.34            | 0.004   | 0.130           |
| Slc26a6                   | NM_134420                 | ref Mus musculus solute carrier family 26, member 6 (Slc26a6), mRNA [NM_134420]                                                                                        | -0.34            | 0.008   | 0.194           |
| Mkl2                      | NM_181860                 | ref Mus musculus MKL/myocardin-like 2 (Mkl2), transcript variant 2, mRNA [NM_181860]                                                                                   | -0.34            | 0.018   | 0.286           |
| chr16:90008636-90015586_F | chr16:90008636-90015586_F | lincRNA:chr16:90008636-90015586 forward strand                                                                                                                         | -0.34            | 0.021   | 0.305           |
| Pdp1                      | NM_001098230              | ref Mus musculus pyruvate dehydrogenase phosphatase catalytic subunit 1 (Pdp1), nuclear gene encoding mitochondrial protein, transcript variant 2, mRNA [NM_001098230] | -0.34            | 0.032   | 0.373           |
| Dnalc4                    | NM_017470                 | ref Mus musculus dynein, axonemal, light chain 4 (Dnalc4), mRNA [NM_017470]                                                                                            | -0.34            | 0.003   | 0.117           |
| Lrrc67                    | NM_027033                 | ref Mus musculus leucine rich repeat containing 67 (Lrrc67), transcript variant 1, mRNA [NM_027033]                                                                    | -0.34            | 0.028   | 0.349           |
| Lypd2                     | NM_026671                 | ref Mus musculus Ly6/Plaur domain containing 2 (Lypd2), mRNA [NM_026671]                                                                                               | -0.34            | 0.037   | 0.398           |
| Cdk5                      | NM_007668                 | ref Mus musculus cyclin-dependent kinase 5 (Cdk5), mRNA [NM_007668]                                                                                                    | -0.34            | 0.021   | 0.302           |
| Rps6ka5                   | NM_153587                 | ref Mus musculus ribosomal protein S6 kinase, polypeptide 5 (Rps6ka5), mRNA [NM_153587]                                                                                | -0.34            | 0.020   | 0.298           |
| Gpsm1                     | NM_153410                 | ref Mus musculus G-protein signalling modulator 1 (AGS3-like, C. elegans) (Gpsm1), mRNA [NM_153410]                                                                    | -0.34            | 0.004   | 0.138           |
| chr13:62771112-62786278_R | chr13:62771112-62786278_R | lincRNA:chr13:62771112-62786278 reverse strand                                                                                                                         | -0.34            | 0.036   | 0.392           |
| chr5:33773842-33942967_R  | chr5:33773842-33942967_R  | lincRNA:chr5:33773842-33942967 reverse strand                                                                                                                          | -0.34            | 0.026   | 0.337           |
| Mrpl49                    | NM_026246                 | ref Mus musculus mitochondrial ribosomal protein L49 (Mrpl49), nuclear gene encoding mitochondrial protein, mRNA [NM_026246]                                           | -0.34            | 0.001   | 0.078           |
| Dusp23                    | XM_001480680              | ref PREDICTED: Mus musculus similar to Dual specificity phosphatase 23 (LOC100048558), mRNA [XM_001480680]                                                             | -0.34            | 0.027   | 0.345           |

Online Supplemental Table IV: Con-STZ Only

| Gene Symbol                 | RefSeq                      | Description                                                                                                                                      | logFC<br>Con-STZ | P-value | Adj.<br>P-value |
|-----------------------------|-----------------------------|--------------------------------------------------------------------------------------------------------------------------------------------------|------------------|---------|-----------------|
| Inha                        | NM_010564                   | ref Mus musculus inhibin alpha (Inha), mRNA [NM_010564]                                                                                          | -0.34            | 0.048   | 0.450           |
| Fign                        | NM_021716                   | ref Mus musculus fidgetin (Fign), mRNA [NM_021716]                                                                                               | -0.34            | 0.009   | 0.195           |
| Dtx3l                       | NM_001013371                | ref Mus musculus deltex 3-like (Drosophila) (Dtx3l), mRNA [NM_001013371]                                                                         | -0.34            | 0.016   | 0.270           |
| 2700050L05Rik               | NM_178115                   | ref Mus musculus RIKEN cDNA 2700050L05 gene (2700050L05Rik), mRNA [NM_178115]                                                                    | -0.34            | 0.014   | 0.249           |
| Clcn2                       | NM_009900                   | ref Mus musculus chloride channel 2 (Clcn2), mRNA [NM_009900]                                                                                    | -0.34            | 0.043   | 0.428           |
| Olf1508                     | NM_020513                   | ref Mus musculus olfactory receptor 1508 (Olf1508), mRNA [NM_020513]                                                                             | -0.34            | 0.038   | 0.404           |
| LOC676813                   | XR_034014                   | ref PREDICTED: Mus musculus similar to glyceraldehyde-3-phosphate dehydrogenase (LOC676813), misc RNA [XR_034014]                                | -0.34            | 0.002   | 0.086           |
| Fam160a1                    | NM_172682                   | ref Mus musculus family with sequence similarity 160, member A1 (Fam160a1), mRNA [NM_172682]                                                     | -0.34            | 0.008   | 0.190           |
| Tssk3                       | NM_080442                   | ref Mus musculus testis-specific serine kinase 3 (Tssk3), mRNA [NM_080442]                                                                       | -0.34            | 0.014   | 0.253           |
| AU015232                    | BG083151                    | gb H3085A09-5 NIA Mouse 15K cDNA Clone Set Mus musculus cDNA clone H3085A09 5', mRNA sequence [BG083151]                                         | -0.34            | 0.012   | 0.234           |
| chr11:102878974-102888924_R | chr11:102878974-102888924_R | lincRNA:chr11:102878974-102888924 reverse strand                                                                                                 | -0.34            | 0.010   | 0.216           |
| LOC100048624                | XM_001480448                | ref PREDICTED: Mus musculus hypothetical protein LOC100048624 (LOC100048624), mRNA [XM_001480448]                                                | -0.34            | 0.005   | 0.155           |
| Bivm                        | NM_144558                   | ref Mus musculus basic, immunoglobulin-like variable motif containing (Bivm), mRNA [NM_144558]                                                   | -0.34            | 0.016   | 0.274           |
| Atpaf2                      | NM_145427                   | ref Mus musculus ATP synthase mitochondrial F1 complex assembly factor 2 (Atpaf2), nuclear gene encoding mitochondrial protein, mRNA [NM_145427] | -0.34            | 0.003   | 0.113           |
| chr2:153163620-153170845_R  | chr2:153163620-153170845_R  | lincRNA:chr2:153163620-153170845 reverse strand                                                                                                  | -0.34            | 0.034   | 0.380           |
| P4ha1                       | NM_011030                   | ref Mus musculus procollagen-proline, 2-oxoglutarate 4-dioxygenase (proline 4-hydroxylase), alpha 1 polypeptide (P4ha1), mRNA [NM_011030]        | -0.34            | 0.005   | 0.152           |
| chr17:56791549-56803877_R   | chr17:56791549-56803877_R   | lincRNA:chr17:56791549-56803877 reverse strand                                                                                                   | -0.34            | 0.021   | 0.303           |
| BC018507                    | NM_144837                   | ref Mus musculus cDNA sequence BC018507 (BC018507), mRNA [NM_144837]                                                                             | -0.34            | 0.007   | 0.179           |
| ENSMUST00000106642          | ENSMUST00000106642          | Unknown                                                                                                                                          | -0.34            | 0.027   | 0.343           |
| D330025C20Rik               | XM_974210                   | ref PREDICTED: Mus musculus RIKEN cDNA D330025C20 gene (D330025C20Rik), mRNA [XM_974210]                                                         | -0.34            | 0.039   | 0.411           |
| ENSMUST00000108660          | ENSMUST00000108660          | ens cytochrome b5 domain containing 1 Gene [Source:MGI (curated);Acc:MGI:2685586] [ENSMUST00000108660]                                           | -0.34            | 0.031   | 0.371           |
| chrX:120300373-120302404_F  | chrX:120300373-120302404_F  | lincRNA:chrX:120300373-120302404 forward strand                                                                                                  | -0.34            | 0.020   | 0.294           |
| Gmnn                        | NM_020567                   | ref Mus musculus geminin (Gmnn), mRNA [NM_020567]                                                                                                | -0.34            | 0.046   | 0.444           |
| Lin9                        | NM_001103182                | ref Mus musculus lin-9 homolog (C. elegans) (Lin9), transcript variant 1, mRNA [NM_001103182]                                                    | -0.34            | 0.008   | 0.194           |
| Prpf4                       | NM_027297                   | ref Mus musculus PRP4 pre-mRNA processing factor 4 homolog (yeast) (Prpf4), mRNA [NM_027297]                                                     | -0.34            | 0.006   | 0.162           |
| Lrp3                        | NM_001024707                | ref Mus musculus low density lipoprotein receptor-related protein 3 (Lrp3), mRNA [NM_001024707]                                                  | -0.34            | 0.008   | 0.184           |
| Ak4                         | NM_001177602                | ref Mus musculus adenylate kinase 4 (Ak4), nuclear gene encoding mitochondrial protein, transcript variant 1, mRNA [NM_001177602]                | -0.34            | 0.001   | 0.071           |
| Exoc3                       | NM_177333                   | ref Mus musculus exocyst complex component 3 (Exoc3), mRNA [NM_177333]                                                                           | -0.35            | 0.021   | 0.306           |

Online Supplemental Table IV: Con-STZ Only

| Gene Symbol                 | RefSeq                      | Description                                                                                                                                               | logFC<br>Con-<br>STZ | P-value | Adj.<br>P-value |
|-----------------------------|-----------------------------|-----------------------------------------------------------------------------------------------------------------------------------------------------------|----------------------|---------|-----------------|
| ENSMUST00000075602          | ENSMUST00000075602          | ref PREDICTED: Mus musculus similar to high mobility group nucleosomal binding domain 2 (LOC671242), mRNA [XM_001478394]                                  | -0.35                | 0.004   | 0.129           |
| E130110022Rik               | AK053566                    | gb Mus musculus 0 day neonate eyeball cDNA, RIKEN full-length enriched library, clone:E130110022 product:unclassifiable, full insert sequence. [AK053566] | -0.35                | 0.039   | 0.407           |
| Plcl2                       | NM_013880                   | ref Mus musculus phospholipase C-like 2 (Plcl2), mRNA [NM_013880]                                                                                         | -0.35                | 0.033   | 0.376           |
| Slc26a6                     | NM_134420                   | ref Mus musculus solute carrier family 26, member 6 (Slc26a6), mRNA [NM_134420]                                                                           | -0.35                | 0.002   | 0.103           |
| chr4:21683562-21694350_R    | chr4:21683562-21694350_R    | lincRNA:chr4:21683562-21694350 reverse strand                                                                                                             | -0.35                | 0.007   | 0.179           |
| chr1:36012298-36020311_R    | chr1:36012298-36020311_R    | lincRNA:chr1:36012298-36020311 reverse strand                                                                                                             | -0.35                | 0.005   | 0.154           |
| chr15:63902437-63908787_F   | chr15:63902437-63908787_F   | lincRNA:chr15:63902437-63908787 forward strand                                                                                                            | -0.35                | 0.025   | 0.331           |
| Plcb2                       | NM_177568                   | ref Mus musculus phospholipase C, beta 2 (Plcb2), mRNA [NM_177568]                                                                                        | -0.35                | 0.029   | 0.353           |
| Pigyl                       | NM_001082532                | ref Mus musculus phosphatidylinositol glycan anchor biosynthesis, class Y-like (Pigyl), mRNA [NM_001082532]                                               | -0.35                | 0.029   | 0.354           |
| BC048679                    | NM_183143                   | ref Mus musculus cDNA sequence BC048679 (BC048679), mRNA [NM_183143]                                                                                      | -0.35                | 0.033   | 0.376           |
| chrX:100688896-100701764_F  | chrX:100688896-100701764_F  | lincRNA:chrX:100688896-100701764 forward strand                                                                                                           | -0.35                | 0.019   | 0.293           |
| LOC100044787                | XR_031000                   | ref PREDICTED: Mus musculus similar to CWF19-like 1, cell cycle control (LOC100044787), misc RNA [XR_031000]                                              | -0.35                | 0.010   | 0.210           |
| Bpil2                       | NM_177772                   | ref Mus musculus bactericidal/permeability-increasing protein-like 2 (Bpil2), mRNA [NM_177772]                                                            | -0.35                | 0.002   | 0.099           |
| Rassf3                      | NM_138956                   | ref Mus musculus Ras association (RalGDS/AF-6) domain family member 3 (Rassf3), mRNA [NM_138956]                                                          | -0.35                | 0.017   | 0.275           |
| Gm4715                      | XM_001481185                | ref PREDICTED: Mus musculus hypothetical protein LOC100043895 (LOC100043895), mRNA [XM_001481185]                                                         | -0.35                | 0.034   | 0.384           |
| chr1:194659312-194661407_R  | chr1:194659312-194661407_R  | lincRNA:chr1:194659312-194661407 reverse strand                                                                                                           | -0.35                | 0.015   | 0.260           |
| Sp8                         | NM_177082                   | ref Mus musculus trans-acting transcription factor 8 (Sp8), mRNA [NM_177082]                                                                              | -0.35                | 0.016   | 0.274           |
| chr12:111079867-111080561_R | chr12:111079867-111080561_R | lincRNA:chr12:111079867-111080561 reverse strand                                                                                                          | -0.35                | 0.023   | 0.321           |
| chr15:68924889-68931607_R   | chr15:68924889-68931607_R   | lincRNA:chr15:68924889-68931607 reverse strand                                                                                                            | -0.35                | 0.047   | 0.446           |
| Scn4a                       | NM_133199                   | ref Mus musculus sodium channel, voltage-gated, type IV, alpha (Scn4a), mRNA [NM_133199]                                                                  | -0.35                | 0.007   | 0.172           |
| Itgb7                       | NM_013566                   | ref Mus musculus integrin beta 7 (Itgb7), mRNA [NM_013566]                                                                                                | -0.35                | 0.037   | 0.401           |
| Asb3                        | NM_023906                   | ref Mus musculus ankyrin repeat and SOCS box-containing 3 (Asb3), mRNA [NM_023906]                                                                        | -0.35                | 0.021   | 0.306           |
| Gadd45gip1                  | NM_183358                   | ref Mus musculus growth arrest and DNA-damage-inducible, gamma interacting protein 1 (Gadd45gip1), mRNA [NM_183358]                                       | -0.35                | 0.020   | 0.295           |
| A_55_P2389893               | A_55_P2389893               | Unknown                                                                                                                                                   | -0.35                | 0.035   | 0.390           |
| Cox15                       | NM_144874                   | ref Mus musculus COX15 homolog, cytochrome c oxidase assembly protein (yeast) (Cox15), nuclear gene encoding mitochondrial protein, mRNA [NM_144874]      | -0.35                | 0.044   | 0.433           |
| Pde4b                       | NM_019840                   | ref Mus musculus phosphodiesterase 4B, cAMP specific (Pde4b), transcript variant 1, mRNA [NM_019840]                                                      | -0.35                | 0.018   | 0.284           |
| chr10:74325583-74396665_R   | chr10:74325583-74396665_R   | lincRNA:chr10:74325583-74396665 reverse strand                                                                                                            | -0.35                | 0.011   | 0.216           |
| Gtf2h3                      | NM_181410                   | ref Mus musculus general transcription factor IIH, polypeptide 3 (Gtf2h3), mRNA [NM_181410]                                                               | -0.35                | 0.012   | 0.230           |



Online Supplemental Table IV: Con-STZ Only

| Gene Symbol                       | RefSeq                     | Description                                                                                                                                | logFC<br>Con-<br>STZ | P-value | Adj.<br>P-value |
|-----------------------------------|----------------------------|--------------------------------------------------------------------------------------------------------------------------------------------|----------------------|---------|-----------------|
| <b>Insrr</b>                      | NM_011832                  | ref Mus musculus insulin receptor-related receptor (Insrr), mRNA [NM_011832]                                                               | -0.35                | 0.012   | 0.233           |
| <b>Kcnb1</b>                      | NM_008420                  | ref Mus musculus potassium voltage gated channel, Shab-related subfamily, member 1 (Kcnb1), mRNA [NM_008420]                               | -0.35                | 0.011   | 0.226           |
| <b>Tbc1d30</b>                    | NM_029057                  | ref Mus musculus TBC1 domain family, member 30 (Tbc1d30), mRNA [NM_029057]                                                                 | -0.35                | 0.025   | 0.331           |
| <b>Smyd1</b>                      | NM_009762                  | ref Mus musculus SET and MYND domain containing 1 (Smyd1), transcript variant 2, mRNA [NM_009762]                                          | -0.35                | 0.014   | 0.253           |
| <b>ENSMUST00000040486</b>         | ENSMUST00000040486         | ens SV2 related protein homolog (rat)-like Gene [Source:MGI (curated);Acc:MGI:2444335] [ENSMUST00000040486]                                | -0.35                | 0.008   | 0.190           |
| <b>LOC100045888</b>               | XM_001475109               | ref PREDICTED: Mus musculus hypothetical protein LOC100045888 (LOC100045888), mRNA [XM_001475109]                                          | -0.35                | 0.050   | 0.457           |
| <b>Gm6946</b>                     | XR_033648                  | ref PREDICTED: Mus musculus similar to LOC654472 protein (LOC629081), misc RNA [XR_033648]                                                 | -0.35                | 0.001   | 0.051           |
| <b>Tg</b>                         | NM_009375                  | ref Mus musculus thyroglobulin (Tg), mRNA [NM_009375]                                                                                      | -0.35                | 0.019   | 0.294           |
| <b>Olf262</b>                     | NM_146688                  | ref Mus musculus olfactory receptor 262 (Olf262), mRNA [NM_146688]                                                                         | -0.35                | 0.049   | 0.454           |
| <b>Cyb5b</b>                      | NM_025558                  | ref Mus musculus cytochrome b5 type B (Cyb5b), nuclear gene encoding mitochondrial protein, mRNA [NM_025558]                               | -0.36                | 0.012   | 0.238           |
| <b>Tsc22d4</b>                    | NM_023910                  | ref Mus musculus TSC22 domain family, member 4 (Tsc22d4), mRNA [NM_023910]                                                                 | -0.36                | 0.004   | 0.140           |
| <b>2310028O11Rik</b>              | NM_001163006               | ref Mus musculus RIKEN cDNA 2310028O11 gene (2310028O11Rik), transcript variant 1, mRNA [NM_001163006]                                     | -0.36                | 0.008   | 0.192           |
| <b>Slc16a7</b>                    | NM_011391                  | ref Mus musculus solute carrier family 16 (monocarboxylic acid transporters), member 7 (Slc16a7), mRNA [NM_011391]                         | -0.36                | 0.031   | 0.368           |
| <b>Hemt1</b>                      | NM_010416                  | ref Mus musculus hematopoietic cell transcript 1 (Hemt1), mRNA [NM_010416]                                                                 | -0.36                | 0.040   | 0.416           |
| <b>Gramd4</b>                     | NM_172611                  | ref Mus musculus GRAM domain containing 4 (Gramd4), mRNA [NM_172611]                                                                       | -0.36                | 0.030   | 0.361           |
| <b>Rad51l3</b>                    | NM_011235                  | ref Mus musculus RAD51-like 3 (S. cerevisiae) (Rad51l3), mRNA [NM_011235]                                                                  | -0.36                | 0.029   | 0.358           |
| <b>Xylt1</b>                      | NM_175645                  | ref Mus musculus xylosyltransferase 1 (Xylt1), mRNA [NM_175645]                                                                            | -0.36                | 0.046   | 0.444           |
| <b>Olf708</b>                     | NM_001011542               | ref Mus musculus olfactory receptor 708 (Olf708), mRNA [NM_001011542]                                                                      | -0.36                | 0.008   | 0.191           |
| <b>Dio1</b>                       | NM_007860                  | ref Mus musculus deiodinase, iodothyronine, type I (Dio1), mRNA [NM_007860]                                                                | -0.36                | 0.022   | 0.311           |
| <b>Hopx</b>                       | NM_175606                  | ref Mus musculus HOP homeobox (Hopx), transcript variant 1, mRNA [NM_175606]                                                               | -0.36                | 0.007   | 0.171           |
| <b>Rragb</b>                      | NM_001004154               | ref Mus musculus Ras-related GTP binding B (Rragb), mRNA [NM_001004154]                                                                    | -0.36                | 0.009   | 0.203           |
| <b>Gpr161</b>                     | NM_001081126               | ref Mus musculus G protein-coupled receptor 161 (Gpr161), mRNA [NM_001081126]                                                              | -0.36                | 0.030   | 0.362           |
| <b>Mrpl50</b>                     | NM_178603                  | ref Mus musculus mitochondrial ribosomal protein L50 (Mrpl50), nuclear gene encoding mitochondrial protein, mRNA [NM_178603]               | -0.36                | 0.003   | 0.119           |
| <b>ENSMUST000000089584</b>        | ENSMUST000000089584        | tc MMSR2 sepiapterin reductase {Mus musculus} (exp=-1; wgp=0; cg=0), partial (30%) [TC1662837]                                             | -0.36                | 0.011   | 0.223           |
| <b>Aars2</b>                      | NM_198608                  | ref Mus musculus alanyl-tRNA synthetase 2, mitochondrial (putative) (Aars2), nuclear gene encoding mitochondrial protein, mRNA [NM_198608] | -0.36                | 0.034   | 0.385           |
| <b>Lca5</b>                       | NM_029434                  | ref Mus musculus Leber congenital amaurosis 5 (human) (Lca5), transcript variant 1, mRNA [NM_029434]                                       | -0.36                | 0.014   | 0.255           |
| <b>chr2:153163620-153170845_R</b> | chr2:153163620-153170845_R | lincRNA:chr2:153163620-153170845 reverse strand                                                                                            | -0.36                | 0.002   | 0.087           |

Online Supplemental Table IV: Con-STZ Only

| Gene Symbol                | RefSeq                     | Description                                                                                                                                                  | logFC<br>Con-<br>STZ | P-value | Adj.<br>P-value |
|----------------------------|----------------------------|--------------------------------------------------------------------------------------------------------------------------------------------------------------|----------------------|---------|-----------------|
| chr1:163508244-163586072_R | chr1:163508244-163586072_R | lincRNA:chr1:163508244-163586072 reverse strand                                                                                                              | -0.36                | 0.046   | 0.444           |
| Trdn                       | NM_029726                  | ref Mus musculus triadin (Trdn), mRNA [NM_029726]                                                                                                            | -0.36                | 0.012   | 0.231           |
| ENSMUST00000113284         | ENSMUST00000113284         | ens transcription factor EB Gene [Source:MGI (curated);Acc:MGI:103270] [ENSMUST00000113284]                                                                  | -0.36                | 0.023   | 0.317           |
| chr1:88396166-88396660_R   | chr1:88396166-88396660_R   | lincRNA:chr1:88396166-88396660 reverse strand                                                                                                                | -0.36                | 0.046   | 0.444           |
| Prune2                     | NM_181348                  | ref Mus musculus prune homolog 2 (Drosophila) (Prune2), mRNA [NM_181348]                                                                                     | -0.36                | 0.008   | 0.184           |
| Fhod3                      | NM_175276                  | ref Mus musculus fomin homology 2 domain containing 3 (Fhod3), mRNA [NM_175276]                                                                              | -0.36                | 0.001   | 0.066           |
| chr16:90038086-90127636_R  | chr16:90038086-90127636_R  | lincRNA:chr16:90038086-90127636 reverse strand                                                                                                               | -0.36                | 0.013   | 0.246           |
| chr1:45066850-45095650_R   | chr1:45066850-45095650_R   | lincRNA:chr1:45066850-45095650 reverse strand                                                                                                                | -0.36                | 0.036   | 0.394           |
| Dusp7                      | NM_153459                  | ref Mus musculus dual specificity phosphatase 7 (Dusp7), mRNA [NM_153459]                                                                                    | -0.36                | 0.006   | 0.161           |
| LOC633703                  | XR_031708                  | ref PREDICTED: Mus musculus similar to high mobility group box 3 (LOC633703), misc RNA [XR_031708]                                                           | -0.36                | 0.009   | 0.200           |
| Klra15                     | NM_013793                  | ref Mus musculus killer cell lectin-like receptor, subfamily A, member 15 (Klra15), mRNA [NM_013793]                                                         | -0.36                | 0.023   | 0.317           |
| D030051J21Rik              | AK083595                   | gb Mus musculus 9 days embryo whole body cDNA, RIKEN full-length enriched library, clone:D030051J21 product:unclassifiable, full insert sequence. [AK083595] | -0.36                | 0.034   | 0.384           |
| Zfp386                     | NM_001004066               | ref Mus musculus zinc finger protein 386 (Kruppel-like) (Zfp386), transcript variant 1, mRNA [NM_001004066]                                                  | -0.36                | 0.033   | 0.380           |
| chr13:24833082-24838461_F  | chr13:24833082-24838461_F  | lincRNA:chr13:24833082-24838461 forward strand                                                                                                               | -0.36                | 0.042   | 0.423           |
| chr9:30529709-30589042_R   | chr9:30529709-30589042_R   | lincRNA:chr9:30529709-30589042 reverse strand                                                                                                                | -0.36                | 0.046   | 0.444           |
| Mrvi1                      | NM_194464                  | ref Mus musculus MRV integration site 1 (Mrvi1), transcript variant 2, mRNA [NM_194464]                                                                      | -0.36                | 0.028   | 0.353           |
| Epb4.9                     | ENSMUST00000110984         | ens erythrocyte protein band 4.9 Gene [Source:MGI Symbol;Acc:MGI:99670] [ENSMUST00000110984]                                                                 | -0.36                | 0.008   | 0.185           |
| Slc25a37                   | NM_026331                  | ref Mus musculus solute carrier family 25, member 37 (Slc25a37), nuclear gene encoding mitochondrial protein, mRNA [NM_026331]                               | -0.36                | 0.013   | 0.248           |
| E030019B06Rik              | XM_916666                  | ref PREDICTED: Mus musculus RIKEN cDNA E030019B06 gene (E030019B06Rik), mRNA [XM_916666]                                                                     | -0.36                | 0.011   | 0.218           |
| Slc35a5                    | NM_028756                  | ref Mus musculus solute carrier family 35, member A5 (Slc35a5), mRNA [NM_028756]                                                                             | -0.36                | 0.010   | 0.208           |
| Ank2                       | NM_178655                  | ref Mus musculus ankyrin 2, brain (Ank2), transcript variant 2, mRNA [NM_178655]                                                                             | -0.36                | 0.009   | 0.197           |
| Cops7b                     | NM_172974                  | ref Mus musculus COP9 (constitutive photomorphogenic) homolog, subunit 7b (Arabidopsis thaliana) (Cops7b), mRNA [NM_172974]                                  | -0.36                | 0.018   | 0.281           |
| Tsfm                       | NM_025537                  | ref Mus musculus Ts translation elongation factor, mitochondrial (Tsfm), nuclear gene encoding mitochondrial protein, mRNA [NM_025537]                       | -0.36                | 0.027   | 0.347           |
| Es22                       | NM_133660                  | ref Mus musculus esterase 22 (Es22), mRNA [NM_133660]                                                                                                        | -0.36                | 0.033   | 0.376           |
| Ano10                      | NM_133979                  | ref Mus musculus anoctamin 10 (Ano10), mRNA [NM_133979]                                                                                                      | -0.36                | 0.047   | 0.446           |
| Cdh8                       | NM_007667                  | ref Mus musculus cadherin 8 (Cdh8), transcript variant 2, mRNA [NM_007667]                                                                                   | -0.36                | 0.015   | 0.260           |
| Sobp                       | NM_175407                  | ref Mus musculus sine oculis-binding protein homolog (Drosophila) (Sobp), mRNA [NM_175407]                                                                   | -0.37                | 0.019   | 0.288           |
| Fam117a                    | NM_172543                  | ref Mus musculus family with sequence similarity 117, memberA (Fam117a), mRNA [NM_172543]                                                                    | -0.37                | 0.049   | 0.456           |
| Hdac7                      | NM_019572                  | ref Mus musculus histone deacetylase 7 (Hdac7), mRNA [NM_019572]                                                                                             | -0.37                | 0.005   | 0.151           |

| Online Supplemental Table IV: Con-STZ Only |                            |                                                                                                                                                            |                  |         |                 |
|--------------------------------------------|----------------------------|------------------------------------------------------------------------------------------------------------------------------------------------------------|------------------|---------|-----------------|
| Gene Symbol                                | RefSeq                     | Description                                                                                                                                                | logFC<br>Con-STZ | P-value | Adj.<br>P-value |
| Gm7286                                     | XR_034212                  | ref PREDICTED: Mus musculus similar to Glyceraldehyde-3-phosphate dehydrogenase (GAPDH) (LOC640094), misc RNA [XR_034212]                                  | -0.37            | 0.001   | 0.075           |
| Olfr16                                     | NM_008763                  | ref Mus musculus olfactory receptor 16 (Olfr16), mRNA [NM_008763]                                                                                          | -0.37            | 0.026   | 0.336           |
| Lekr1                                      | NM_001037923               | ref Mus musculus leucine, glutamate and lysine rich 1 (Lekr1), transcript variant 2, mRNA [NM_001037923]                                                   | -0.37            | 0.009   | 0.201           |
| Rab22a                                     | NM_024436                  | ref Mus musculus RAB22A, member RAS oncogene family (Rab22a), mRNA [NM_024436]                                                                             | -0.37            | 0.031   | 0.369           |
| Vac14                                      | NM_146216                  | ref Mus musculus Vac14 homolog (S. cerevisiae) (Vac14), mRNA [NM_146216]                                                                                   | -0.37            | 0.014   | 0.253           |
| C030005K06Rik                              | AK137789                   | gb Mus musculus 16 days neonate thymus cDNA, RIKEN full-length enriched library, clone:A130009K03 product:unclassifiable, full insert sequence. [AK137789] | -0.37            | 0.040   | 0.415           |
| chr15:58928225-58939975_R                  | chr15:58928225-58939975_R  | lincRNA:chr15:58928225-58939975 reverse strand                                                                                                             | -0.37            | 0.041   | 0.418           |
| Fam36a                                     | NM_025511                  | ref Mus musculus family with sequence similarity 36, member A (Fam36a), mRNA [NM_025511]                                                                   | -0.37            | 0.008   | 0.186           |
| chr11:58659807-58676282_R                  | chr11:58659807-58676282_R  | lincRNA:chr11:58659807-58676282 reverse strand                                                                                                             | -0.37            | 0.030   | 0.362           |
| chr3:86827945-86886695_F                   | chr3:86827945-86886695_F   | lincRNA:chr3:86827945-86886695 forward strand                                                                                                              | -0.37            | 0.030   | 0.362           |
| ENSMUST00000093139                         | ENSMUST00000093139         | ens splicing factor 3b, subunit 3 Gene [Source:MGI Symbol;Acc:MGI:1289341] [ENSMUST00000093139]                                                            | -0.37            | 0.042   | 0.424           |
| Slc16a9                                    | NM_025807                  | ref Mus musculus solute carrier family 16 (monocarboxylic acid transporters), member 9 (Slc16a9), mRNA [NM_025807]                                         | -0.37            | 0.014   | 0.255           |
| chrX:10222494-102267068_F                  | chrX:10222494-102267068_F  | lincRNA:chrX:10222494-102267068 forward strand                                                                                                             | -0.37            | 0.038   | 0.402           |
| Gm4217                                     | XR_032480                  | ref PREDICTED: Mus musculus similar to Glyceraldehyde-3-phosphate dehydrogenase (GAPDH) (LOC100045725), misc RNA [XR_032480]                               | -0.37            | 0.000   | 0.043           |
| Gpr155                                     | NM_001080707               | ref Mus musculus G protein-coupled receptor 155 (Gpr155), transcript variant 2, mRNA [NM_001080707]                                                        | -0.37            | 0.015   | 0.260           |
| Nudt6                                      | NM_153561                  | ref Mus musculus nudix (nucleoside diphosphate linked moiety X)-type motif 6 (Nudt6), mRNA [NM_153561]                                                     | -0.37            | 0.031   | 0.370           |
| Rassf9                                     | NM_146240                  | ref Mus musculus Ras association (RalGDS/AF-6) domain family (N-terminal) member 9 (Rassf9), mRNA [NM_146240]                                              | -0.37            | 0.033   | 0.379           |
| chr8:123901815-123902167_R                 | chr8:123901815-123902167_R | lincRNA:chr8:123901815-123902167 reverse strand                                                                                                            | -0.37            | 0.042   | 0.425           |
| Rtn2                                       | NM_013648                  | ref Mus musculus reticulon 2 (Z-band associated protein) (Rtn2), transcript variant B, mRNA [NM_013648]                                                    | -0.37            | 0.012   | 0.231           |
| Kcnh8                                      | NM_001031811               | ref Mus musculus potassium voltage-gated channel, subfamily H (eag-related), member 8 (Kcnh8), mRNA [NM_001031811]                                         | -0.37            | 0.021   | 0.307           |
| Gm6842                                     | XR_033094                  | ref PREDICTED: Mus musculus predicted gene, EG628117 (EG628117), misc RNA [XR_033094]                                                                      | -0.37            | 0.033   | 0.376           |
| chr15:61919018-61935580_R                  | chr15:61919018-61935580_R  | lincRNA:chr15:61919018-61935580 reverse strand                                                                                                             | -0.37            | 0.030   | 0.365           |
| Gm2199                                     | XR_030982                  | ref PREDICTED: Mus musculus similar to mitochondrial carrier homolog 2 (LOC100039506), misc RNA [XR_030982]                                                | -0.37            | 0.026   | 0.342           |
| St3gal4                                    | NM_009178                  | ref Mus musculus ST3 beta-galactoside alpha-2,3-sialyltransferase 4 (St3gal4), mRNA [NM_009178]                                                            | -0.37            | 0.040   | 0.415           |
| chr7:16633756-16634410_F                   | chr7:16633756-16634410_F   | lincRNA:chr7:16633756-16634410 forward strand                                                                                                              | -0.37            | 0.005   | 0.148           |
| LOC100044910                               | XM_001473316               | ref PREDICTED: Mus musculus hypothetical protein LOC100044910 (LOC100044910), mRNA [XM_001473316]                                                          | -0.37            | 0.025   | 0.332           |
| Gm2230                                     | XM_001479590               | ref PREDICTED: Mus musculus hypothetical protein LOC100048128 (LOC100048128), mRNA [XM_001479590]                                                          | -0.37            | 0.018   | 0.286           |

| Online Supplemental Table IV: Con-STZ Only |                           |                                                                                                                                                |                  |         |                 |
|--------------------------------------------|---------------------------|------------------------------------------------------------------------------------------------------------------------------------------------|------------------|---------|-----------------|
| Gene Symbol                                | RefSeq                    | Description                                                                                                                                    | logFC<br>Con-STZ | P-value | Adj.<br>P-value |
| Smtn                                       | NM_001159284              | ref Mus musculus smoothelin (Smtn), transcript variant 1, mRNA [NM_001159284]                                                                  | -0.37            | 0.019   | 0.288           |
| H2-Oa                                      | NM_008206                 | ref Mus musculus histocompatibility 2, O region alpha locus (H2-Oa), mRNA [NM_008206]                                                          | -0.37            | 0.010   | 0.214           |
| Gm8590                                     | XR_033658                 | ref PREDICTED: Mus musculus similar to SET domain-containing protein (LOC667353), misc RNA [XR_033658]                                         | -0.37            | 0.016   | 0.274           |
| Mrs2                                       | NM_001013389              | ref Mus musculus MRS2 magnesium homeostasis factor homolog (S. cerevisiae) (Mrs2), mRNA [NM_001013389]                                         | -0.37            | 0.036   | 0.393           |
| ENSMUST00000065533                         | ENSMUST00000065533        | ens Putative uncharacterized protein [Source:UniProtKB/TrEMBL;Acc:Q3USW9] [ENSMUST00000065533]                                                 | -0.37            | 0.003   | 0.123           |
| Slc2a12                                    | ENSMUST00000042261        | ens solute carrier family 2 (facilitated glucose transporter), member 12 Gene [Source:MGI Symbol;Acc:MGI:3052471] [ENSMUST00000042261]         | -0.37            | 0.004   | 0.129           |
| Vangl2                                     | ENSMUST00000111263        | ens vang-like 2 (van gogh, Drosophila) Gene [Source:MGI (curated);Acc:MGI:2135272] [ENSMUST00000111263]                                        | -0.37            | 0.007   | 0.182           |
| Zfp384                                     | NM_175557                 | ref Mus musculus zinc finger protein 384 (Zfp384), mRNA [NM_175557]                                                                            | -0.38            | 0.034   | 0.385           |
| ENSMUST00000111835                         | ENSMUST00000111835        | ens serine/threonine/tyrosine interaction protein Gene [Source:MGI Symbol;Acc:MGI:1891150] [ENSMUST00000111835]                                | -0.38            | 0.033   | 0.376           |
| Klhdc1                                     | NM_178253                 | ref Mus musculus kelch domain containing 1 (Klhdc1), mRNA [NM_178253]                                                                          | -0.38            | 0.005   | 0.147           |
| Smardc1                                    | NM_031842                 | ref Mus musculus SWI/SNF related, matrix associated, actin dependent regulator of chromatin, subfamily d, member 1 (Smardc1), mRNA [NM_031842] | -0.38            | 0.031   | 0.367           |
| Adam17                                     | NM_009615                 | ref Mus musculus a disintegrin and metallopeptidase domain 17 (Adam17), mRNA [NM_009615]                                                       | -0.38            | 0.023   | 0.317           |
| 2010204K13Rik                              | NR_027924                 | ref Mus musculus RIKEN cDNA 2010204K13 gene (2010204K13Rik), transcript variant 1, non-coding RNA [NR_027924]                                  | -0.38            | 0.029   | 0.358           |
| Pdhx                                       | NM_175094                 | ref Mus musculus pyruvate dehydrogenase complex, component X (Pdhx), nuclear gene encoding mitochondrial protein, mRNA [NM_175094]             | -0.38            | 0.023   | 0.318           |
| Opa3                                       | ENSMUST00000063976        | ens optic atrophy 3 (human) Gene [Source:MGI Symbol;Acc:MGI:2686271] [ENSMUST00000063976]                                                      | -0.38            | 0.002   | 0.102           |
| chr1:63264155-63345773_F                   | chr1:63264155-63345773_F  | lincRNA:chr1:63264155-63345773 forward strand                                                                                                  | -0.38            | 0.043   | 0.428           |
| Rxrg                                       | NM_009107                 | ref Mus musculus retinoid X receptor gamma (Rxrg), transcript variant 1, mRNA [NM_009107]                                                      | -0.38            | 0.037   | 0.399           |
| Metap11                                    | NM_025633                 | ref Mus musculus methionine aminopeptidase-like 1 (Metap11), mRNA [NM_025633]                                                                  | -0.38            | 0.023   | 0.321           |
| Mrpl42                                     | NM_026065                 | ref Mus musculus mitochondrial ribosomal protein L42 (Mrpl42), nuclear gene encoding mitochondrial protein, mRNA [NM_026065]                   | -0.38            | 0.003   | 0.108           |
| chr12:9117250-9128800_F                    | chr12:9117250-9128800_F   | lincRNA:chr12:9117250-9128800 forward strand                                                                                                   | -0.38            | 0.005   | 0.154           |
| Olfir763                                   | NM_146862                 | ref Mus musculus olfactory receptor 763 (Olfir763), mRNA [NM_146862]                                                                           | -0.38            | 0.031   | 0.370           |
| chr10:18047851-18049641_R                  | chr10:18047851-18049641_R | lincRNA:chr10:18047851-18049641 reverse strand                                                                                                 | -0.38            | 0.013   | 0.245           |
| Zfyve28                                    | NM_001015039              | ref Mus musculus zinc finger, FYVE domain containing 28 (Zfyve28), mRNA [NM_001015039]                                                         | -0.38            | 0.025   | 0.331           |
| chr18:25622407-25635118_R                  | chr18:25622407-25635118_R | lincRNA:chr18:25622407-25635118 reverse strand                                                                                                 | -0.38            | 0.042   | 0.425           |
| chr12:88172043-88172731_R                  | chr12:88172043-88172731_R | lincRNA:chr12:88172043-88172731 reverse strand                                                                                                 | -0.38            | 0.018   | 0.285           |
| Nqo2                                       | NM_020282                 | ref Mus musculus NAD(P)H dehydrogenase, quinone 2 (Nqo2), transcript variant 1, mRNA [NM_020282]                                               | -0.38            | 0.013   | 0.242           |
| Fam82a2                                    | NM_001033136              | ref Mus musculus family with sequence similarity 82, member A2 (Fam82a2), mRNA [NM_001033136]                                                  | -0.38            | 0.024   | 0.327           |

Online Supplemental Table IV: Con-STZ Only

| Gene Symbol                 | RefSeq                      | Description                                                                                                                                                               | logFC<br>Con-STZ | P-value | Adj.<br>P-value |
|-----------------------------|-----------------------------|---------------------------------------------------------------------------------------------------------------------------------------------------------------------------|------------------|---------|-----------------|
| Atl2                        | NM_019717                   | ref Mus musculus atlastin GTPase 2 (Atl2), transcript variant 1, mRNA [NM_019717]                                                                                         | -0.38            | 0.002   | 0.085           |
| Crtac1                      | NM_145123                   | ref Mus musculus cartilage acidic protein 1 (Crtac1), mRNA [NM_145123]                                                                                                    | -0.38            | 0.029   | 0.357           |
| ENSMUST00000089252          | ENSMUST00000089252          | ens RIKEN cDNA I730030J21 gene Gene [Source:MGI Symbol;Acc:MGI:3588279] [ENSMUST00000089252]                                                                              | -0.38            | 0.001   | 0.076           |
| Dock4                       | NM_172803                   | ref Mus musculus dedicator of cytokinesis 4 (Dock4), mRNA [NM_172803]                                                                                                     | -0.38            | 0.013   | 0.240           |
| chr7:4827340-4863315_F      | chr7:4827340-4863315_F      | lincRNA:chr7:4827340-4863315 forward strand                                                                                                                               | -0.38            | 0.045   | 0.440           |
| Slc25a26                    | NM_026255                   | ref Mus musculus solute carrier family 25 (mitochondrial carrier, phosphate carrier), member 26 (Slc25a26), nuclear gene encoding mitochondrial protein, mRNA [NM_026255] | -0.38            | 0.003   | 0.112           |
| 1700040L02Rik               | NM_028491                   | ref Mus musculus RIKEN cDNA 1700040L02 gene (1700040L02Rik), mRNA [NM_028491]                                                                                             | -0.38            | 0.007   | 0.174           |
| 4932438A13Rik               | NM_172679                   | ref Mus musculus RIKEN cDNA 4932438A13 gene (4932438A13Rik), mRNA [NM_172679]                                                                                             | -0.38            | 0.016   | 0.273           |
| Traf3ip3                    | NM_153137                   | ref Mus musculus TRAF3 interacting protein 3 (Traf3ip3), mRNA [NM_153137]                                                                                                 | -0.38            | 0.001   | 0.071           |
| Socs1                       | NM_009896                   | ref Mus musculus suppressor of cytokine signaling 1 (Socs1), mRNA [NM_009896]                                                                                             | -0.38            | 0.011   | 0.228           |
| chr14:105987405-106063477_F | chr14:105987405-106063477_F | lincRNA:chr14:105987405-106063477 forward strand                                                                                                                          | -0.38            | 0.042   | 0.422           |
| XM_975100                   | XM_975100                   | ref PREDICTED: Mus musculus hypothetical LOC666709 (LOC666709), mRNA [XM_975100]                                                                                          | -0.38            | 0.014   | 0.252           |
| Sfxn4                       | NM_053198                   | ref Mus musculus sideroflexin 4 (Sfxn4), mRNA [NM_053198]                                                                                                                 | -0.38            | 0.002   | 0.085           |
| chr16:39984031-40081556_R   | chr16:39984031-40081556_R   | lincRNA:chr16:39984031-40081556 reverse strand                                                                                                                            | -0.38            | 0.044   | 0.433           |
| chr2:77146893-77155643_R    | chr2:77146893-77155643_R    | lincRNA:chr2:77146893-77155643 reverse strand                                                                                                                             | -0.38            | 0.042   | 0.426           |
| chr6:126766225-126771309_F  | chr6:126766225-126771309_F  | lincRNA:chr6:126766225-126771309 forward strand                                                                                                                           | -0.38            | 0.006   | 0.161           |
| ENSMUST00000074862          | ENSMUST00000074862          | ens Putative uncharacterized protein [Source:UniProtKB/TrEMBL;Acc:Q8C9R0] [ENSMUST00000074862]                                                                            | -0.38            | 0.019   | 0.290           |
| Slc35e1                     | NM_177766                   | ref Mus musculus solute carrier family 35, member E1 (Slc35e1), mRNA [NM_177766]                                                                                          | -0.38            | 0.007   | 0.176           |
| Lef1                        | NM_010703                   | ref Mus musculus lymphoid enhancer binding factor 1 (Lef1), mRNA [NM_010703]                                                                                              | -0.38            | 0.048   | 0.450           |
| Nrxn1                       | NM_020252                   | ref Mus musculus neurexin I (Nrxn1), transcript variant 1, mRNA [NM_020252]                                                                                               | -0.38            | 0.024   | 0.327           |
| chr14:105497388-105511063_R | chr14:105497388-105511063_R | lincRNA:chr14:105497388-105511063 reverse strand                                                                                                                          | -0.38            | 0.043   | 0.429           |
| Slc12a5                     | NM_020333                   | ref Mus musculus solute carrier family 12, member 5 (Slc12a5), mRNA [NM_020333]                                                                                           | -0.38            | 0.001   | 0.072           |
| Fasn                        | NM_007988                   | ref Mus musculus fatty acid synthase (Fasn), mRNA [NM_007988]                                                                                                             | -0.38            | 0.009   | 0.199           |
| A330044P14Rik               | AK039452                    | gb Mus musculus adult male spinal cord cDNA, RIKEN full-length enriched library, clone:A330044P14 product:unclassifiable, full insert sequence. [AK039452]                | -0.38            | 0.022   | 0.315           |
| Gm3105                      | XM_001475665                | ref PREDICTED: Mus musculus hypothetical protein LOC100041029 (LOC100041029), mRNA [XM_001475665]                                                                         | -0.38            | 0.034   | 0.385           |
| Rhox2c                      | NM_001099318                | ref Mus musculus reproductive homeobox 2C (Rhox2c), mRNA [NM_001099318]                                                                                                   | -0.38            | 0.027   | 0.343           |
| Sema6d                      | NM_199241                   | ref Mus musculus sema domain, transmembrane domain (TM), and cytoplasmic domain, (semaphorin) 6D (Sema6d), transcript variant 4, mRNA [NM_199241]                         | -0.38            | 0.009   | 0.202           |
| chr11:50994911-51050704_R   | chr11:50994911-51050704_R   | lincRNA:chr11:50994911-51050704 reverse strand                                                                                                                            | -0.38            | 0.017   | 0.280           |
| Gm7632                      | XM_976882                   | ref PREDICTED: Mus musculus predicted gene, EG665429 (EG665429), mRNA [XM_976882]                                                                                         | -0.38            | 0.036   | 0.394           |

| Online Supplemental Table IV: Con-STZ Only |                            |                                                                                                                                                                |                  |         |                 |
|--------------------------------------------|----------------------------|----------------------------------------------------------------------------------------------------------------------------------------------------------------|------------------|---------|-----------------|
| Gene Symbol                                | RefSeq                     | Description                                                                                                                                                    | logFC<br>Con-STZ | P-value | Adj.<br>P-value |
| Fbxw7                                      | NM_080428                  | ref Mus musculus F-box and WD-40 domain protein 7 (Fbxw7), transcript variant 3, mRNA [NM_080428]                                                              | -0.38            | 0.015   | 0.265           |
| chr13:26649529-26838004_R                  | chr13:26649529-26838004_R  | lincRNA:chr13:26649529-26838004 reverse strand                                                                                                                 | -0.39            | 0.041   | 0.419           |
| Tsc22d4                                    | NM_023910                  | ref Mus musculus TSC22 domain family, member 4 (Tsc22d4), mRNA [NM_023910]                                                                                     | -0.39            | 0.001   | 0.070           |
| Wdr7                                       | NM_001014981               | ref Mus musculus WD repeat domain 7 (Wdr7), mRNA [NM_001014981]                                                                                                | -0.39            | 0.047   | 0.446           |
| Ncapd2                                     | NM_146171                  | ref Mus musculus non-SMC condensin I complex, subunit D2 (Ncapd2), mRNA [NM_146171]                                                                            | -0.39            | 0.015   | 0.260           |
| Lrrc20                                     | NM_153542                  | ref Mus musculus leucine rich repeat containing 20 (Lrrc20), mRNA [NM_153542]                                                                                  | -0.39            | 0.010   | 0.208           |
| chr6:83391748-83398316_F                   | chr6:83391748-83398316_F   | lincRNA:chr6:83391748-83398316 forward strand                                                                                                                  | -0.39            | 0.031   | 0.370           |
| Setd8                                      | NM_030241                  | ref Mus musculus SET domain containing (lysine methyltransferase) 8 (Setd8), mRNA [NM_030241]                                                                  | -0.39            | 0.003   | 0.123           |
| chrX:146827709-146913398_R                 | chrX:146827709-146913398_R | lincRNA:chrX:146827709-146913398 reverse strand                                                                                                                | -0.39            | 0.003   | 0.123           |
| Gdpd2                                      | NM_023608                  | ref Mus musculus glycerophosphodiester phosphodiesterase domain containing 2 (Gdpd2), mRNA [NM_023608]                                                         | -0.39            | 0.024   | 0.326           |
| Pms1                                       | NM_153556                  | ref Mus musculus postmeiotic segregation increased 1 (S. cerevisiae) (Pms1), mRNA [NM_153556]                                                                  | -0.39            | 0.016   | 0.273           |
| Ube2n                                      | NM_080560                  | ref Mus musculus ubiquitin-conjugating enzyme E2N (Ube2n), mRNA [NM_080560]                                                                                    | -0.39            | 0.011   | 0.219           |
| BC062258                                   | AK144577                   | gb Mus musculus lung RCB-0558 LLC cDNA, RIKEN full-length enriched library, clone:G730002O11 product:unclassifiable, full insert sequence. [AK144577]          | -0.39            | 0.001   | 0.060           |
| Brd3                                       | NM_023336                  | ref Mus musculus bromodomain containing 3 (Brd3), transcript variant 3, mRNA [NM_023336]                                                                       | -0.39            | 0.003   | 0.118           |
| A430088P11Rik                              | AK040361                   | gb Mus musculus 0 day neonate thymus cDNA, RIKEN full-length enriched library, clone:A430088P11 product:unclassifiable, full insert sequence. [AK040361]       | -0.39            | 0.001   | 0.046           |
| 2010002M09Rik                              | AK008051                   | gb Mus musculus adult male small intestine cDNA, RIKEN full-length enriched library, clone:2010002M09 product:unclassifiable, full insert sequence. [AK008051] | -0.39            | 0.038   | 0.402           |
| Dcaf12l2                                   | NM_175539                  | ref Mus musculus DDB1 and CUL4 associated factor 12-like 2 (Dcaf12l2), mRNA [NM_175539]                                                                        | -0.39            | 0.015   | 0.260           |
| Gm5710                                     | XR_033066                  | ref PREDICTED: Mus musculus similar to Glyceraldehyde-3-phosphate dehydrogenase (LOC435752), misc RNA [XR_033066]                                              | -0.39            | 0.001   | 0.051           |
| chr6:36790208-36792056_R                   | chr6:36790208-36792056_R   | lincRNA:chr6:36790208-36792056 reverse strand                                                                                                                  | -0.39            | 0.021   | 0.303           |
| Prune2                                     | NM_181348                  | ref Mus musculus prune homolog 2 (Drosophila) (Prune2), mRNA [NM_181348]                                                                                       | -0.39            | 0.042   | 0.425           |
| Mapkapk3                                   | NM_178907                  | ref Mus musculus mitogen-activated protein kinase-activated protein kinase 3 (Mapkapk3), mRNA [NM_178907]                                                      | -0.39            | 0.001   | 0.078           |
| Slc28a2                                    | NM_172980                  | ref Mus musculus solute carrier family 28 (sodium-coupled nucleoside transporter), member 2 (Slc28a2), mRNA [NM_172980]                                        | -0.39            | 0.042   | 0.424           |
| chr3:9628206-9631521_F                     | chr3:9628206-9631521_F     | lincRNA:chr3:9628206-9631521 forward strand                                                                                                                    | -0.39            | 0.008   | 0.192           |
| chr15:38630866-38640611_R                  | chr15:38630866-38640611_R  | lincRNA:chr15:38630866-38640611 reverse strand                                                                                                                 | -0.39            | 0.015   | 0.263           |
| chr3:70581406-70614856_F                   | chr3:70581406-70614856_F   | lincRNA:chr3:70581406-70614856 forward strand                                                                                                                  | -0.39            | 0.006   | 0.158           |
| 2310030N02Rik                              | NM_001085493               | ref Mus musculus RIKEN cDNA 2310030N02 gene (2310030N02Rik), mRNA [NM_001085493]                                                                               | -0.39            | 0.001   | 0.077           |
| ENSMUST00000084243                         | ENSMUST00000084243         | ens Putative uncharacterized protein [Source:UniProtKB/TrEMBL;Acc:Q6R5G1] [ENSMUST00000084243]                                                                 | -0.39            | 0.025   | 0.332           |



Online Supplemental Table IV: Con-STZ Only

| Gene Symbol                | RefSeq                     | Description                                                                                                                                             | logFC<br>Con-STZ | P-value | Adj.<br>P-value |
|----------------------------|----------------------------|---------------------------------------------------------------------------------------------------------------------------------------------------------|------------------|---------|-----------------|
| chr11:20369534-20371458_F  | chr11:20369534-20371458_F  | lincRNA:chr11:20369534-20371458 forward strand                                                                                                          | -0.39            | 0.034   | 0.384           |
| Bai3                       | NM_175642                  | ref Mus musculus brain-specific angiogenesis inhibitor 3 (Bai3), mRNA [NM_175642]                                                                       | -0.39            | 0.048   | 0.449           |
| Arl5c                      | NM_207231                  | ref Mus musculus ADP-ribosylation factor-like 5C (Arl5c), mRNA [NM_207231]                                                                              | -0.39            | 0.049   | 0.452           |
| chr14:62267786-62285335_F  | chr14:62267786-62285335_F  | lincRNA:chr14:62267786-62285335 forward strand                                                                                                          | -0.39            | 0.003   | 0.115           |
| Ccdc85c                    | NM_001159910               | ref Mus musculus coiled-coil domain containing 85C (Ccdc85c), mRNA [NM_001159910]                                                                       | -0.39            | 0.003   | 0.106           |
| ENSMUST00000090640         | ENSMUST00000090640         | ens RIKEN cDNA 1700110I01 gene Gene [Source:MGI Symbol;Acc:MGI:1920799] [ENSMUST00000100902]                                                            | -0.40            | 0.001   | 0.057           |
| Stk10                      | NM_009288                  | ref Mus musculus serine/threonine kinase 10 (Stk10), mRNA [NM_009288]                                                                                   | -0.40            | 0.011   | 0.227           |
| Gm3855                     | XM_001478261               | ref PREDICTED: Mus musculus similar to Activated in Blocked Unfolded protein response family member (abu-2) (LOC100042461), mRNA [XM_001478261]         | -0.40            | 0.022   | 0.314           |
| Ung                        | NM_001040691               | ref Mus musculus uracil DNA glycosylase (Ung), transcript variant 1, mRNA [NM_001040691]                                                                | -0.40            | 0.001   | 0.050           |
| Fancb                      | NM_175027                  | ref Mus musculus Fanconi anemia, complementation group B (Fancb), transcript variant 2, mRNA [NM_175027]                                                | -0.40            | 0.003   | 0.117           |
| LOC100039037               | XR_032542                  | ref PREDICTED: Mus musculus similar to EMO2 (LOC665680), misc RNA [XR_032542]                                                                           | -0.40            | 0.014   | 0.249           |
| chr4:118723941-118757032_R | chr4:118723941-118757032_R | lincRNA:chr4:118723941-118757032 reverse strand                                                                                                         | -0.40            | 0.024   | 0.326           |
| chr9:30529709-30589042_R   | chr9:30529709-30589042_R   | lincRNA:chr9:30529709-30589042 reverse strand                                                                                                           | -0.40            | 0.011   | 0.223           |
| Neur1B                     | NM_001081656               | ref Mus musculus neuralized homolog 1B (Drosophila) (Neur1B), mRNA [NM_001081656]                                                                       | -0.40            | 0.000   | 0.035           |
| Hmgn2                      | NM_016957                  | ref Mus musculus high mobility group nucleosomal binding domain 2 (Hmgn2), mRNA [NM_016957]                                                             | -0.40            | 0.018   | 0.284           |
| Capn3                      | NM_007601                  | ref Mus musculus calpain 3 (Capn3), transcript variant a, mRNA [NM_007601]                                                                              | -0.40            | 0.025   | 0.330           |
| Nebi                       | NM_028757                  | ref Mus musculus nebulin (Nebi), mRNA [NM_028757]                                                                                                       | -0.40            | 0.046   | 0.443           |
| Gm5588                     | XM_001480058               | ref PREDICTED: Mus musculus similar to novel androgen binding protein (Abp) family member (LOC434161), mRNA [XM_001480058]                              | -0.40            | 0.030   | 0.364           |
| Mast1                      | NM_019945                  | ref Mus musculus microtubule associated serine/threonine kinase 1 (Mast1), mRNA [NM_019945]                                                             | -0.40            | 0.017   | 0.274           |
| Pdxk                       | NM_172134                  | ref Mus musculus pyridoxal (pyridoxine, vitamin B6) kinase (Pdxk), mRNA [NM_172134]                                                                     | -0.40            | 0.005   | 0.145           |
| chr16:46384974-46391331_F  | chr16:46384974-46391331_F  | lincRNA:chr16:46384974-46391331 forward strand                                                                                                          | -0.40            | 0.034   | 0.383           |
| chr6:100162756-100178531_F | chr6:100162756-100178531_F | lincRNA:chr6:100162756-100178531 forward strand                                                                                                         | -0.40            | 0.018   | 0.282           |
| Taar9                      | NM_001010831               | ref Mus musculus trace amine-associated receptor 9 (Taar9), mRNA [NM_001010831]                                                                         | -0.40            | 0.037   | 0.401           |
| Slc22a23                   | NM_001033167               | ref Mus musculus solute carrier family 22, member 23 (Slc22a23), mRNA [NM_001033167]                                                                    | -0.40            | 0.011   | 0.218           |
| Gm2212                     | XM_001472797               | ref PREDICTED: Mus musculus hypothetical protein LOC100039404 (LOC100039404), mRNA [XM_001472797]                                                       | -0.40            | 0.002   | 0.091           |
| Gxylt2                     | NM_198612                  | ref Mus musculus glucoside xylosyltransferase 2 (Gxylt2), mRNA [NM_198612]                                                                              | -0.40            | 0.003   | 0.105           |
| Tubb1                      | NM_001080971               | ref Mus musculus tubulin, beta 1 (Tubb1), mRNA [NM_001080971]                                                                                           | -0.40            | 0.043   | 0.428           |
| 8430437L04Rik              | AK018472                   | gb Mus musculus 16 days embryo lung cDNA, RIKEN full-length enriched library, clone:8430437L04 product:unclassifiable, full insert sequence. [AK018472] | -0.40            | 0.050   | 0.456           |
| Hba-a1                     | NM_008218                  | ref Mus musculus hemoglobin alpha, adult chain 1 (Hba-a1), mRNA [NM_008218]                                                                             | -0.40            | 0.014   | 0.251           |

Online Supplemental Table IV: Con-STZ Only

| Gene Symbol                 | RefSeq                      | Description                                                                                                                                   | logFC<br>Con-STZ | P-value | Adj.<br>P-value |
|-----------------------------|-----------------------------|-----------------------------------------------------------------------------------------------------------------------------------------------|------------------|---------|-----------------|
| Fabp12                      | NM_029310                   | ref Mus musculus fatty acid binding protein 12 (Fabp12), mRNA [NM_029310]                                                                     | -0.40            | 0.019   | 0.293           |
| chr10:93774693-93893616_F   | chr10:93774693-93893616_F   | lincRNA:chr10:93774693-93893616 forward strand                                                                                                | -0.40            | 0.035   | 0.387           |
| Oosp1                       | NM_133353                   | ref Mus musculus oocyte secreted protein 1 (Oosp1), mRNA [NM_133353]                                                                          | -0.40            | 0.049   | 0.455           |
| St8sia4                     | NM_009183                   | ref Mus musculus ST8 alpha-N-acetyl-neuraminide alpha-2,8-sialyltransferase 4 (St8sia4), transcript variant 1, mRNA [NM_009183]               | -0.40            | 0.019   | 0.291           |
| chr11:102878974-102888924_F | chr11:102878974-102888924_F | lincRNA:chr11:102878974-102888924 forward strand                                                                                              | -0.40            | 0.048   | 0.452           |
| chr8:18592437-18593034_R    | chr8:18592437-18593034_R    | lincRNA:chr8:18592437-18593034 reverse strand                                                                                                 | -0.41            | 0.033   | 0.380           |
| Rab9b                       | NM_176971                   | ref Mus musculus RAB9B, member RAS oncogene family (Rab9b), mRNA [NM_176971]                                                                  | -0.41            | 0.004   | 0.142           |
| Stard4                      | NM_133774                   | ref Mus musculus StAR-related lipid transfer (START) domain containing 4 (Stard4), mRNA [NM_133774]                                           | -0.41            | 0.026   | 0.338           |
| chr2:174917150-174935618_R  | chr2:174917150-174935618_R  | lincRNA:chr2:174917150-174935618 reverse strand                                                                                               | -0.41            | 0.024   | 0.325           |
| Gm5678                      | XM_487442                   | ref PREDICTED: Mus musculus predicted gene, EG435489 (EG435489), mRNA [XM_487442]                                                             | -0.41            | 0.009   | 0.199           |
| chr8:119732348-119749198_R  | chr8:119732348-119749198_R  | lincRNA:chr8:119732348-119749198 reverse strand                                                                                               | -0.41            | 0.032   | 0.372           |
| Btla                        | NM_001037719                | ref Mus musculus B and T lymphocyte associated (Btla), transcript variant 1, mRNA [NM_001037719]                                              | -0.41            | 0.042   | 0.423           |
| chr6:134846715-134847933_R  | chr6:134846715-134847933_R  | lincRNA:chr6:134846715-134847933 reverse strand                                                                                               | -0.41            | 0.002   | 0.093           |
| Arhgap26                    | NM_175164                   | ref Mus musculus Rho GTPase activating protein 26 (Arhgap26), mRNA [NM_175164]                                                                | -0.41            | 0.001   | 0.051           |
| Cars2                       | NM_024248                   | ref Mus musculus cysteinyl-tRNA synthetase 2 (mitochondrial)(putative) (Cars2), nuclear gene encoding mitochondrial protein, mRNA [NM_024248] | -0.41            | 0.002   | 0.094           |
| Hecw1                       | NM_001081348                | ref Mus musculus HECT, C2 and WW domain containing E3 ubiquitin protein ligase 1 (Hecw1), mRNA [NM_001081348]                                 | -0.41            | 0.001   | 0.059           |
| Gm15478                     | XM_001478433                | ref PREDICTED: Mus musculus hypothetical protein LOC100047384 (LOC100047384), mRNA [XM_001478433]                                             | -0.41            | 0.029   | 0.354           |
| ENSMUST00000106800          | ENSMUST00000106800          | ens endoplasmic reticulum (ER) to nucleus signalling 1 Gene [Source:MGI (curated);Acc:MGI:1930134] [ENSMUST00000106800]                       | -0.41            | 0.044   | 0.435           |
| Upk2                        | NM_009476                   | ref Mus musculus uroplakin 2 (Upk2), mRNA [NM_009476]                                                                                         | -0.41            | 0.046   | 0.444           |
| Edil3                       | NM_010103                   | ref Mus musculus EGF-like repeats and discoidin I-like domains 3 (Edil3), transcript variant 2, mRNA [NM_010103]                              | -0.41            | 0.022   | 0.314           |
| Ezr                         | NM_009510                   | ref Mus musculus ezrin (Ezr), mRNA [NM_009510]                                                                                                | -0.41            | 0.019   | 0.288           |
| Acsl6                       | NM_001033599                | ref Mus musculus acyl-CoA synthetase long-chain family member 6 (Acsl6), transcript variant 4, mRNA [NM_001033599]                            | -0.41            | 0.033   | 0.380           |
| Krt6b                       | NM_010669                   | ref Mus musculus keratin 6B (Krt6b), mRNA [NM_010669]                                                                                         | -0.41            | 0.022   | 0.312           |
| Stmn1                       | NM_019641                   | ref Mus musculus stathmin 1 (Stmn1), mRNA [NM_019641]                                                                                         | -0.41            | 0.019   | 0.288           |
| chr10:66559716-66647841_F   | chr10:66559716-66647841_F   | lincRNA:chr10:66559716-66647841 forward strand                                                                                                | -0.41            | 0.018   | 0.282           |
| chr13:74568375-74601000_F   | chr13:74568375-74601000_F   | lincRNA:chr13:74568375-74601000 forward strand                                                                                                | -0.41            | 0.019   | 0.294           |
| ENSMUST00000103749          | ENSMUST00000103749          | ens immunoglobulin lambda chain, variable 1 Gene [Source:MGI Symbol;Acc:MGI:96530] [ENSMUST00000103749]                                       | -0.41            | 0.044   | 0.432           |
| Hunk                        | NM_015755                   | ref Mus musculus hormonally upregulated Neu-associated kinase (Hunk), mRNA [NM_015755]                                                        | -0.41            | 0.028   | 0.353           |

Online Supplemental Table IV: Con-STZ Only

| Gene Symbol                | RefSeq                     | Description                                                                                                                                                                  | logFC<br>Con-STZ | P-value | Adj.<br>P-value |
|----------------------------|----------------------------|------------------------------------------------------------------------------------------------------------------------------------------------------------------------------|------------------|---------|-----------------|
| chr11:51003332-51033057_R  | chr11:51003332-51033057_R  | lincRNA:chr11:51003332-51033057 reverse strand                                                                                                                               | -0.41            | 0.036   | 0.393           |
| chr2:78767440-78768949_F   | chr2:78767440-78768949_F   | lincRNA:chr2:78767440-78768949 forward strand                                                                                                                                | -0.41            | 0.013   | 0.240           |
| Btn1a1                     | NM_013483                  | ref  Mus musculus butyrophilin, subfamily 1, member A1 (Btn1a1), mRNA [NM_013483]                                                                                            | -0.41            | 0.000   | 0.045           |
| chrX:148720661-148763177_F | chrX:148720661-148763177_F | lincRNA:chrX:148720661-148763177 forward strand                                                                                                                              | -0.41            | 0.048   | 0.450           |
| Slc16a10                   | NM_028247                  | ref Mus musculus solute carrier family 16 (monocarboxylic acid transporters), member 10 (Slc16a10), transcript variant 2, mRNA [NM_028247]                                   | -0.41            | 0.036   | 0.394           |
| Hsbp1l1                    | NM_001136181               | ref  Mus musculus heat shock factor binding protein 1-like 1 (Hsbp1l1), mRNA [NM_001136181]                                                                                  | -0.41            | 0.021   | 0.304           |
| C130026I21Rik              | NM_175219                  | ref  Mus musculus RIKEN cDNA C130026I21 gene (C130026I21Rik), transcript variant 1, mRNA [NM_175219]                                                                         | -0.41            | 0.050   | 0.457           |
| Fhdc1                      | NM_001033301               | ref  Mus musculus FH2 domain containing 1 (Fhdc1), mRNA [NM_001033301]                                                                                                       | -0.41            | 0.031   | 0.368           |
| ENSMUST00000062809         | ENSMUST00000062809         | gb Mus musculus 12 days embryo head cDNA, RIKEN full-length enriched library, clone:3010024O21 product:hypothetical protein, full insert sequence. [AK013898]                | -0.41            | 0.010   | 0.208           |
| Alas2                      | NM_009653                  | ref  Mus musculus aminolevulinic acid synthase 2, erythroid (Alas2), nuclear gene encoding mitochondrial protein, transcript variant 1, mRNA [NM_009653]                     | -0.41            | 0.033   | 0.376           |
| Slc25a11                   | NM_024211                  | ref  Mus musculus solute carrier family 25 (mitochondrial carrier oxoglutarate carrier), member 11 (Slc25a11), nuclear gene encoding mitochondrial protein, mRNA [NM_024211] | -0.41            | 0.003   | 0.117           |
| 1700112E06Rik              | NM_028275                  | ref Mus musculus RIKEN cDNA 1700112E06 gene (1700112E06Rik), mRNA [NM_028275]                                                                                                | -0.41            | 0.001   | 0.078           |
| Epha5                      | NM_007937                  | ref  Mus musculus Eph receptor A5 (Epha5), mRNA [NM_007937]                                                                                                                  | -0.41            | 0.001   | 0.067           |
| chr3:84609788-84618062_R   | chr3:84609788-84618062_R   | lincRNA:chr3:84609788-84618062 reverse strand                                                                                                                                | -0.41            | 0.044   | 0.436           |
| Epb4.2                     | NM_013513                  | ref  Mus musculus erythrocyte protein band 4.2 (Epb4.2), mRNA [NM_013513]                                                                                                    | -0.41            | 0.028   | 0.352           |
| Kcnj3                      | NM_008426                  | ref  Mus musculus potassium inwardly-rectifying channel, subfamily J, member 3 (Kcnj3), mRNA [NM_008426]                                                                     | -0.41            | 0.004   | 0.138           |
| Phactr2                    | NM_001033257               | ref  Mus musculus phosphatase and actin regulator 2 (Phactr2), mRNA [NM_001033257]                                                                                           | -0.42            | 0.000   | 0.030           |
| Memo1                      | NM_133771                  | ref Mus musculus mediator of cell motility 1 (Memo1), mRNA [NM_133771]                                                                                                       | -0.42            | 0.004   | 0.128           |
| Gm5066                     | XR_034763                  | ref  PREDICTED: Mus musculus predicted gene, EG272633 (EG272633), misc RNA [XR_034763]                                                                                       | -0.42            | 0.037   | 0.396           |
| Kcnj5                      | NM_010605                  | ref Mus musculus potassium inwardly-rectifying channel, subfamily J, member 5 (Kcnj5), mRNA [NM_010605]                                                                      | -0.42            | 0.001   | 0.080           |
| chr17:32213027-32228368_R  | chr17:32213027-32228368_R  | lincRNA:chr17:32213027-32228368 reverse strand                                                                                                                               | -0.42            | 0.013   | 0.243           |
| C87882                     | BG067895                   | gb H3059D09-3 NIA Mouse 15K cDNA Clone Set Mus musculus cDNA clone H3059D09 3', mRNA sequence [BG067895]                                                                     | -0.42            | 0.035   | 0.388           |
| Proca1                     | ENSMUST00000108317         | ens  protein interacting with cyclin A1 Gene [Source:MGI (curated);Acc:MGI:1918274] [ENSMUST00000108317]                                                                     | -0.42            | 0.045   | 0.440           |
| Igsf9                      | NM_033608                  | ref  Mus musculus immunoglobulin superfamily, member 9 (Igsf9), transcript variant 1, mRNA [NM_033608]                                                                       | -0.42            | 0.001   | 0.058           |
| Ccng1                      | NM_009831                  | ref Mus musculus cyclin G1 (Ccng1), mRNA [NM_009831]                                                                                                                         | -0.42            | 0.001   | 0.053           |
| Abhd8                      | NM_022419                  | ref  Mus musculus abhydrolase domain containing 8 (Abhd8), mRNA [NM_022419]                                                                                                  | -0.42            | 0.001   | 0.063           |

| Online Supplemental Table IV: Con-STZ Only |                           |                                                                                                                                                                    |                  |         |                 |
|--------------------------------------------|---------------------------|--------------------------------------------------------------------------------------------------------------------------------------------------------------------|------------------|---------|-----------------|
| Gene Symbol                                | RefSeq                    | Description                                                                                                                                                        | logFC<br>Con-STZ | P-value | Adj.<br>P-value |
| Gm4118                                     | XR_034065                 | ref PREDICTED: Mus musculus similar to proteasome (prosome, macropain) subunit, alpha type 2 (LOC100042941), misc RNA [XR_034065]                                  | -0.42            | 0.040   | 0.413           |
| 5830487J09Rik                              | AK051760                  | gb Mus musculus 12 days embryo spinal ganglion cDNA, RIKEN full-length enriched library, clone:D130074J01 product:unclassifiable, full insert sequence. [AK051760] | -0.42            | 0.012   | 0.230           |
| Depdc7                                     | NM_144804                 | ref Mus musculus DEP domain containing 7 (Depdc7), mRNA [NM_144804]                                                                                                | -0.42            | 0.042   | 0.426           |
| Txn14a                                     | NM_025299                 | ref Mus musculus thioredoxin-like 4A (Txn14a), transcript variant 1, mRNA [NM_025299]                                                                              | -0.42            | 0.016   | 0.272           |
| Gm2091                                     | XM_001472298              | ref PREDICTED: Mus musculus similar to chemokine (C-C motif) ligand 27 (LOC100039193), mRNA [XM_001472298]                                                         | -0.42            | 0.001   | 0.063           |
| LOC100047831                               | XM_001478956              | ref PREDICTED: Mus musculus similar to cyclic nucleotide gated channel beta 1 (LOC100047831), mRNA [XM_001478956]                                                  | -0.42            | 0.015   | 0.260           |
| Nr2f1                                      | NM_010151                 | ref Mus musculus nuclear receptor subfamily 2, group F, member 1 (Nr2f1), mRNA [NM_010151]                                                                         | -0.42            | 0.015   | 0.266           |
| chr6:86524425-86524935_F                   | chr6:86524425-86524935_F  | lincRNA:chr6:86524425-86524935 forward strand                                                                                                                      | -0.42            | 0.033   | 0.378           |
| ENSMUST00000097953                         | ENSMUST00000097953        | ens Putative uncharacterized protein Fragment [Source:UniProtKB/TrEMBL;Acc:Q3U0A7] [ENSMUST00000097953]                                                            | -0.42            | 0.000   | 0.042           |
| Nhlrc1                                     | NM_175340                 | ref Mus musculus NHL repeat containing 1 (Nhlrc1), mRNA [NM_175340]                                                                                                | -0.42            | 0.022   | 0.316           |
| chr9:67414463-67483185_R                   | chr9:67414463-67483185_R  | lincRNA:chr9:67414463-67483185 reverse strand                                                                                                                      | -0.42            | 0.029   | 0.357           |
| Oip5                                       | NM_001042653              | ref Mus musculus Opa interacting protein 5 (Oip5), mRNA [NM_001042653]                                                                                             | -0.42            | 0.033   | 0.376           |
| 4933427D06Rik                              | NM_175017                 | ref Mus musculus RIKEN cDNA 4933427D06 gene (4933427D06Rik), mRNA [NM_175017]                                                                                      | -0.42            | 0.002   | 0.092           |
| chr18:32389816-32394927_R                  | chr18:32389816-32394927_R | lincRNA:chr18:32389816-32394927 reverse strand                                                                                                                     | -0.43            | 0.045   | 0.439           |
| Cplx3                                      | NM_146223                 | ref Mus musculus complexin 3 (Cplx3), mRNA [NM_146223]                                                                                                             | -0.43            | 0.032   | 0.375           |
| Faim3                                      | NM_026976                 | ref Mus musculus Fas apoptotic inhibitory molecule 3 (Faim3), mRNA [NM_026976]                                                                                     | -0.43            | 0.034   | 0.381           |
| Ankrd40                                    | NM_146024                 | ref Mus musculus ankyrin repeat domain 40 (Ankrd40), transcript variant 2, mRNA [NM_146024]                                                                        | -0.43            | 0.036   | 0.395           |
| A_55_P2106815                              | A_55_P2106815             | Unknown                                                                                                                                                            | -0.43            | 0.043   | 0.428           |
| Atpaf1                                     | NM_181040                 | ref Mus musculus ATP synthase mitochondrial F1 complex assembly factor 1 (Atpaf1), nuclear gene encoding mitochondrial protein, mRNA [NM_181040]                   | -0.43            | 0.023   | 0.319           |
| Gm13140                                    | XR_032815                 | ref PREDICTED: Mus musculus similar to DNA-dependent ATPase SNF2H (LOC626288), misc RNA [XR_032815]                                                                | -0.43            | 0.016   | 0.270           |
| Spata2                                     | NM_170756                 | ref Mus musculus spermatogenesis associated 2 (Spata2), mRNA [NM_170756]                                                                                           | -0.43            | 0.004   | 0.127           |
| Rpl3l                                      | NM_025425                 | ref Mus musculus ribosomal protein L3-like (Rpl3l), transcript variant 2, mRNA [NM_025425]                                                                         | -0.43            | 0.002   | 0.099           |
| Pard3                                      | NM_001013581              | ref Mus musculus par-3 (partitioning defective 3) homolog (C. elegans) (Pard3), transcript variant 1, mRNA [NM_001013581]                                          | -0.43            | 0.019   | 0.287           |
| Zfp791                                     | NM_001037745              | ref Mus musculus zinc finger protein 791 (Zfp791), mRNA [NM_001037745]                                                                                             | -0.43            | 0.001   | 0.069           |
| Kcnh6                                      | NM_001037712              | ref Mus musculus potassium voltage-gated channel, subfamily H (eag-related), member 6 (Kcnh6), mRNA [NM_001037712]                                                 | -0.43            | 0.008   | 0.194           |
| Atp5f1                                     | NM_009725                 | ref Mus musculus ATP synthase, H+ transporting, mitochondrial F0 complex, subunit B1 (Atp5f1), nuclear gene encoding mitochondrial protein, mRNA [NM_009725]       | -0.43            | 0.010   | 0.208           |

Online Supplemental Table IV: Con-STZ Only

| Gene Symbol                | RefSeq                     | Description                                                                                                                                           | logFC<br>Con-<br>STZ | P-value | Adj.<br>P-value |
|----------------------------|----------------------------|-------------------------------------------------------------------------------------------------------------------------------------------------------|----------------------|---------|-----------------|
| chr1:182686731-182709331_F | chr1:182686731-182709331_F | lincRNA:chr1:182686731-182709331 forward strand                                                                                                       | -0.43                | 0.007   | 0.182           |
| chr4:146890596-146891297_F | chr4:146890596-146891297_F | lincRNA:chr4:146890596-146891297 forward strand                                                                                                       | -0.43                | 0.048   | 0.452           |
| Cenpa                      | NM_007681                  | ref Mus musculus centromere protein A (Cenpa), mRNA [NM_007681]                                                                                       | -0.43                | 0.002   | 0.084           |
| chr6:91928958-91936887_R   | chr6:91928958-91936887_R   | lincRNA:chr6:91928958-91936887 reverse strand                                                                                                         | -0.43                | 0.005   | 0.153           |
| chrX:47893703-47996700_R   | chrX:47893703-47996700_R   | lincRNA:chrX:47893703-47996700 reverse strand                                                                                                         | -0.43                | 0.047   | 0.446           |
| Cox15                      | NM_144874                  | ref Mus musculus COX15 homolog, cytochrome c oxidase assembly protein (yeast) (Cox15), nuclear gene encoding mitochondrial protein, mRNA [NM_144874]  | -0.43                | 0.029   | 0.356           |
| 2810417H13Rik              | NM_026515                  | ref Mus musculus RIKEN cDNA 2810417H13 gene (2810417H13Rik), mRNA [NM_026515]                                                                         | -0.43                | 0.029   | 0.356           |
| ENSMUST00000105050         | ENSMUST00000105050         | ens Putative keratin-associated protein 10-like ENSP00000375147 homolog. [Source:UniProtKB/Swiss-Prot;Acc:A2A5X5] [ENSMUST00000105050]                | -0.43                | 0.013   | 0.242           |
| Gfra4                      | NM_020014                  | ref Mus musculus glial cell line derived neurotrophic factor family receptor alpha 4 (Gfra4), transcript variant 2, mRNA [NM_020014]                  | -0.43                | 0.012   | 0.238           |
| Gm4942                     | XM_139402                  | ref PREDICTED: Mus musculus predicted gene, EG239502 (EG239502), mRNA [XM_139402]                                                                     | -0.43                | 0.008   | 0.184           |
| 4930552N02Rik              | AK016098                   | gb Mus musculus adult male testis cDNA, RIKEN full-length enriched library, clone:4930552N02 product:unclassifiable, full insert sequence. [AK016098] | -0.43                | 0.004   | 0.138           |
| Dhfr                       | NM_010049                  | ref Mus musculus dihydrofolate reductase (Dhfr), mRNA [NM_010049]                                                                                     | -0.43                | 0.001   | 0.065           |
| chrX:90997595-91009570_F   | chrX:90997595-91009570_F   | lincRNA:chrX:90997595-91009570 forward strand                                                                                                         | -0.43                | 0.009   | 0.199           |
| Fam160b2                   | NM_194345                  | ref Mus musculus family with sequence similarity 160, member B2 (Fam160b2), mRNA [NM_194345]                                                          | -0.43                | 0.001   | 0.062           |
| Gm5347                     | NM_001079931               | ref Mus musculus predicted gene 5347 (Gm5347), mRNA [NM_001079931]                                                                                    | -0.43                | 0.028   | 0.352           |
| Gm11375                    | XM_001478246               | ref PREDICTED: Mus musculus hypothetical protein LOC100042491 (LOC100042491), mRNA [XM_001478246]                                                     | -0.43                | 0.025   | 0.330           |
| Dennd2c                    | NM_177857                  | ref Mus musculus DENN/MADD domain containing 2C (Dennd2c), mRNA [NM_177857]                                                                           | -0.43                | 0.039   | 0.410           |
| Sh3rf2                     | NM_172966                  | ref Mus musculus SH3 domain containing ring finger 2 (Sh3rf2), transcript variant 2, mRNA [NM_172966]                                                 | -0.43                | 0.006   | 0.157           |
| Ssx2ip                     | NM_138744                  | ref Mus musculus synovial sarcoma, X breakpoint 2 interacting protein (Ssx2ip), mRNA [NM_138744]                                                      | -0.43                | 0.036   | 0.395           |
| Ppapdc3                    | NM_145521                  | ref Mus musculus phosphatidic acid phosphatase type 2 domain containing 3 (Ppapdc3), mRNA [NM_145521]                                                 | -0.43                | 0.011   | 0.222           |
| Pilra                      | NM_153510                  | ref Mus musculus paired immunoglobulin-like type 2 receptor alpha (Pilra), mRNA [NM_153510]                                                           | -0.43                | 0.024   | 0.329           |
| ENSMUST00000107381         | ENSMUST00000107381         | ens tubulin tyrosine ligase-like family, member 13 Gene [Source:MGI (curated);Acc:MGI:1920845] [ENSMUST00000107381]                                   | -0.43                | 0.019   | 0.294           |
| Dpysl5                     | NM_023047                  | ref Mus musculus dihydropyrimidinase-like 5 (Dpysl5), mRNA [NM_023047]                                                                                | -0.43                | 0.001   | 0.074           |
| chr3:35236023-35241498_R   | chr3:35236023-35241498_R   | lincRNA:chr3:35236023-35241498 reverse strand                                                                                                         | -0.44                | 0.047   | 0.447           |
| Arfrp1                     | NM_029702                  | ref Mus musculus ADP-ribosylation factor related protein 1 (Arfrp1), transcript variant 2, mRNA [NM_029702]                                           | -0.44                | 0.011   | 0.227           |
| Lix1                       | NM_025681                  | ref Mus musculus limb expression 1 homolog (chicken) (Lix1), mRNA [NM_025681]                                                                         | -0.44                | 0.026   | 0.340           |
| Sept3                      | NM_011889                  | ref Mus musculus septin 3 (Sept3), mRNA [NM_011889]                                                                                                   | -0.44                | 0.000   | 0.043           |
| Slc1a4                     | NM_018861                  | ref Mus musculus solute carrier family 1 (glutamate/neutral amino acid transporter), member 4 (Slc1a4), mRNA [NM_018861]                              | -0.44                | 0.002   | 0.104           |
| 4933425O20Rik              | NM_025753                  | ref Mus musculus RIKEN cDNA 4933425O20 gene (4933425O20Rik), mRNA [NM_025753]                                                                         | -0.44                | 0.001   | 0.066           |

| Online Supplemental Table IV: Con-STZ Only |                           |                                                                                                                                                                |                      |         |                 |
|--------------------------------------------|---------------------------|----------------------------------------------------------------------------------------------------------------------------------------------------------------|----------------------|---------|-----------------|
| Gene Symbol                                | RefSeq                    | Description                                                                                                                                                    | logFC<br>Con-<br>STZ | P-value | Adj.<br>P-value |
| <b>Olf648</b>                              | NM_146751                 | ref Mus musculus olfactory receptor 648 (Olf648), mRNA [NM_146751]                                                                                             | -0.44                | 0.040   | 0.415           |
| <b>Traip</b>                               | NM_011634                 | ref Mus musculus TRAF-interacting protein (Traip), mRNA [NM_011634]                                                                                            | -0.44                | 0.046   | 0.444           |
| <b>Hrh3</b>                                | NM_133849                 | ref Mus musculus histamine receptor H3 (Hrh3), mRNA [NM_133849]                                                                                                | -0.44                | 0.021   | 0.303           |
| <b>Kbtbd13</b>                             | NM_028974                 | ref Mus musculus kelch repeat and BTB (POZ) domain containing 13 (Kbtbd13), mRNA [NM_028974]                                                                   | -0.44                | 0.024   | 0.327           |
| <b>Gm11223</b>                             | XM_001474074              | ref PREDICTED: Mus musculus similar to Pr22, transcript variant 1 (LOC100039888), mRNA [XM_001474074]                                                          | -0.44                | 0.013   | 0.247           |
| <b>Gm14004</b>                             | XM_001480066              | ref PREDICTED: Mus musculus hypothetical protein LOC100043375 (LOC100043375), mRNA [XM_001480066]                                                              | -0.44                | 0.048   | 0.452           |
| <b>Afmid</b>                               | NM_027827                 | ref Mus musculus arylformamidase (Afmid), mRNA [NM_027827]                                                                                                     | -0.44                | 0.002   | 0.080           |
| <b>Hfe2</b>                                | NM_027126                 | ref Mus musculus hemochromatosis type 2 (juvenile) (human homolog) (Hfe2), mRNA [NM_027126]                                                                    | -0.44                | 0.003   | 0.117           |
| <b>Hpca</b>                                | NM_001130419              | ref Mus musculus hippocalcin (Hpca), mRNA [NM_001130419]                                                                                                       | -0.44                | 0.003   | 0.119           |
| <b>1700025C18Rik</b>                       | NR_033448                 | ref Mus musculus RIKEN cDNA 1700025C18 gene (1700025C18Rik), non-coding RNA [NR_033448]                                                                        | -0.44                | 0.031   | 0.369           |
| <b>Pak4</b>                                | NM_027470                 | ref Mus musculus p21 protein (Cdc42/Rac)-activated kinase 4 (Pak4), mRNA [NM_027470]                                                                           | -0.44                | 0.000   | 0.032           |
| <b>B930025P03Rik</b>                       | AK047141                  | gb Mus musculus 10 days neonate cerebellum cDNA, RIKEN full-length enriched library, clone:B930025P03 product:unclassifiable, full insert sequence. [AK047141] | -0.44                | 0.014   | 0.250           |
| <b>ENSMUST00000099167</b>                  | ENSMUST00000099167        | ens phosphatidylinositol glycan anchor biosynthesis, class U Gene [Source:MGI (curated);Acc:MGI:3039607] [ENSMUST00000099167]                                  | -0.44                | 0.032   | 0.374           |
| <b>chr17:33995525-34028025_F</b>           | chr17:33995525-34028025_F | lincRNA:chr17:33995525-34028025 forward strand                                                                                                                 | -0.44                | 0.045   | 0.439           |
| <b>ENSMUST00000111089</b>                  | ENSMUST00000111089        | ens neurofilament, medium polypeptide Gene [Source:MGI (curated);Acc:MGI:97314] [ENSMUST00000111089]                                                           | -0.45                | 0.047   | 0.447           |
| <b>LOC100046848</b>                        | XR_032971                 | ref PREDICTED: Mus musculus hypothetical protein LOC100046848 (LOC100046848), misc RNA [XR_032971]                                                             | -0.45                | 0.020   | 0.295           |
| <b>chr13:78341864-78375825_R</b>           | chr13:78341864-78375825_R | lincRNA:chr13:78341864-78375825 reverse strand                                                                                                                 | -0.45                | 0.029   | 0.358           |
| <b>Slc41a3</b>                             | NM_027868                 | ref Mus musculus solute carrier family 41, member 3 (Slc41a3), transcript variant 1, mRNA [NM_027868]                                                          | -0.45                | 0.000   | 0.039           |
| <b>Zbtb49</b>                              | NM_029162                 | ref Mus musculus zinc finger and BTB domain containing 49 (Zbtb49), mRNA [NM_029162]                                                                           | -0.45                | 0.012   | 0.235           |
| <b>chr8:41730287-41746862_F</b>            | chr8:41730287-41746862_F  | lincRNA:chr8:41730287-41746862 forward strand                                                                                                                  | -0.45                | 0.036   | 0.393           |
| <b>Fam70b</b>                              | NM_001143671              | ref Mus musculus family with sequence similarity 70, member B (Fam70b), transcript variant 1, mRNA [NM_001143671]                                              | -0.45                | 0.018   | 0.282           |
| <b>Hist2h3c1</b>                           | NM_178216                 | ref Mus musculus histone cluster 2, H3c1 (Hist2h3c1), mRNA [NM_178216]                                                                                         | -0.45                | 0.002   | 0.087           |
| <b>Gm3501</b>                              | XM_001478132              | ref PREDICTED: Mus musculus hypothetical protein LOC100041760 (LOC100041760), mRNA [XM_001478132]                                                              | -0.45                | 0.019   | 0.290           |
| <b>Gm826</b>                               | NM_001033411              | ref Mus musculus predicted gene 826 (Gm826), mRNA [NM_001033411]                                                                                               | -0.45                | 0.001   | 0.077           |
| <b>Trav13n-1</b>                           | ENSMUST00000110630        | ens TRAV13-1 Fragment [Source:UniProtKB/TrEMBL;Acc:Q5R1D4] [ENSMUST00000110630]                                                                                | -0.45                | 0.032   | 0.375           |
| <b>Bicap</b>                               | NM_016916                 | ref Mus musculus bladder cancer associated protein homolog (human) (Bicap), mRNA [NM_016916]                                                                   | -0.45                | 0.000   | 0.037           |



| Online Supplemental Table IV: Con-STZ Only |                            |                                                                                                                                                                                                |                  |         |                 |
|--------------------------------------------|----------------------------|------------------------------------------------------------------------------------------------------------------------------------------------------------------------------------------------|------------------|---------|-----------------|
| Gene Symbol                                | RefSeq                     | Description                                                                                                                                                                                    | logFC<br>Con-STZ | P-value | Adj.<br>P-value |
| LOC100047628                               | ENSMUST00000103404         | ref PREDICTED: Mus musculus similar to Chain L, Structural Basis Of Antigen Mimicry In A Clinically Relevant Melanoma Antigen System, transcript variant 1 (LOC100047628), mRNA [XM_001476664] | -0.45            | 0.024   | 0.325           |
| chr15:73227424-73257474_R                  | chr15:73227424-73257474_R  | lincRNA:chr15:73227424-73257474 reverse strand                                                                                                                                                 | -0.45            | 0.011   | 0.221           |
| 4921504E06Rik                              | NM_027600                  | ref Mus musculus RIKEN cDNA 4921504E06 gene (4921504E06Rik), mRNA [NM_027600]                                                                                                                  | -0.45            | 0.047   | 0.449           |
| Nt5dc2                                     | NM_027289                  | ref Mus musculus 5'-nucleotidase domain containing 2 (Nt5dc2), mRNA [NM_027289]                                                                                                                | -0.45            | 0.009   | 0.200           |
| Clasp1                                     | NM_001081276               | ref Mus musculus CLIP associating protein 1 (Clasp1), transcript variant 1, mRNA [NM_001081276]                                                                                                | -0.45            | 0.037   | 0.400           |
| Mtx1                                       | NM_013604                  | ref Mus musculus metaxin 1 (Mtx1), nuclear gene encoding mitochondrial protein, transcript variant 1, mRNA [NM_013604]                                                                         | -0.45            | 0.035   | 0.388           |
| A430089I19Rik                              | NM_177913                  | ref Mus musculus RIKEN cDNA A430089I19 gene (A430089I19Rik), mRNA [NM_177913]                                                                                                                  | -0.45            | 0.025   | 0.330           |
| Kcnh2                                      | NM_013569                  | ref Mus musculus potassium voltage-gated channel, subfamily H (eag-related), member 2 (Kcnh2), mRNA [NM_013569]                                                                                | -0.45            | 0.003   | 0.118           |
| chr3:38320928-38341869_F                   | chr3:38320928-38341869_F   | lincRNA:chr3:38320928-38341869 forward strand                                                                                                                                                  | -0.45            | 0.002   | 0.095           |
| BC023202                                   | AK141429                   | gb Mus musculus 12 days embryo spinal cord cDNA, RIKEN full-length enriched library, clone:C530014B18 product:unclassifiable, full insert sequence. [AK141429]                                 | -0.45            | 0.002   | 0.103           |
| Olf20                                      | NM_146923                  | ref Mus musculus olfactory receptor 20 (Olf20), mRNA [NM_146923]                                                                                                                               | -0.46            | 0.030   | 0.362           |
| chr12:76744947-76778372_R                  | chr12:76744947-76778372_R  | lincRNA:chr12:76744947-76778372 reverse strand                                                                                                                                                 | -0.46            | 0.007   | 0.171           |
| LOC676620                                  | XM_991601                  | ref PREDICTED: Mus musculus similar to ATPase type 13A2 (LOC676620), mRNA [XM_991601]                                                                                                          | -0.46            | 0.012   | 0.237           |
| 4933421D24Rik                              | AK016858                   | gb Mus musculus adult male testis cDNA, RIKEN full-length enriched library, clone:4933421D24 product:unclassifiable, full insert sequence. [AK016858]                                          | -0.46            | 0.014   | 0.253           |
| ENSMUST00000109606                         | ENSMUST00000109606         | ens Rho-related BTB domain containing 3 Gene [Source:MGI (curated);Acc:MGI:1920546] [ENSMUST00000109606]                                                                                       | -0.46            | 0.001   | 0.052           |
| chr15:8463685-8494960_R                    | chr15:8463685-8494960_R    | lincRNA:chr15:8463685-8494960 reverse strand                                                                                                                                                   | -0.46            | 0.020   | 0.299           |
| chr11:55315017-55322092_F                  | chr11:55315017-55322092_F  | lincRNA:chr11:55315017-55322092 forward strand                                                                                                                                                 | -0.46            | 0.016   | 0.273           |
| Tspan18                                    | NM_183180                  | ref Mus musculus tetraspanin 18 (Tspan18), mRNA [NM_183180]                                                                                                                                    | -0.46            | 0.036   | 0.391           |
| chr2:153166892-153171546_R                 | chr2:153166892-153171546_R | lincRNA:chr2:153166892-153171546 reverse strand                                                                                                                                                | -0.46            | 0.002   | 0.094           |
| chr17:95255725-95272425_R                  | chr17:95255725-95272425_R  | lincRNA:chr17:95255725-95272425 reverse strand                                                                                                                                                 | -0.46            | 0.002   | 0.099           |
| chr2:156654934-156665632_R                 | chr2:156654934-156665632_R | lincRNA:chr2:156654934-156665632 reverse strand                                                                                                                                                | -0.46            | 0.031   | 0.367           |
| ENSMUST00000050571                         | ENSMUST00000050571         | ens RIKEN cDNA A730020M07 gene Gene [Source:MGI Symbol;Acc:MGI:2442643] [ENSMUST00000050571]                                                                                                   | -0.46            | 0.009   | 0.201           |
| Eif4e1b                                    | NM_001033269               | ref Mus musculus eukaryotic translation initiation factor 4E family member 1B (Eif4e1b), transcript variant 1, mRNA [NM_001033269]                                                             | -0.46            | 0.028   | 0.349           |
| chr1:134867906-134885481_F                 | chr1:134867906-134885481_F | lincRNA:chr1:134867906-134885481 forward strand                                                                                                                                                | -0.46            | 0.035   | 0.388           |
| Gm12273                                    | XM_001479118               | ref PREDICTED: Mus musculus hypothetical protein D630015H07 (D630015H07), mRNA [XM_001479118]                                                                                                  | -0.46            | 0.012   | 0.233           |
| Tcp10a                                     | NM_009340                  | ref Mus musculus t-complex protein 10a (Tcp10a), mRNA [NM_009340]                                                                                                                              | -0.46            | 0.010   | 0.208           |
| chr1:71730139-71730720_F                   | chr1:71730139-71730720_F   | lincRNA:chr1:71730139-71730720 forward strand                                                                                                                                                  | -0.46            | 0.027   | 0.345           |

Online Supplemental Table IV: Con-STZ Only

| Gene Symbol                | RefSeq                     | Description                                                                                                                                                           | logFC<br>Con-<br>STZ | P-value | Adj.<br>P-value |
|----------------------------|----------------------------|-----------------------------------------------------------------------------------------------------------------------------------------------------------------------|----------------------|---------|-----------------|
| 1110032F04Rik              | NM_001167996               | ref Mus musculus RIKEN cDNA 1110032F04 gene (1110032F04Rik), mRNA [NM_001167996]                                                                                      | -0.46                | 0.032   | 0.374           |
| 1700007G11Rik              | NM_001024614               | ref Mus musculus RIKEN cDNA 1700007G11 gene (1700007G11Rik), mRNA [NM_001024614]                                                                                      | -0.46                | 0.040   | 0.415           |
| chr15:68161768-68193518_F  | chr15:68161768-68193518_F  | lincRNA:chr15:68161768-68193518 forward strand                                                                                                                        | -0.46                | 0.036   | 0.393           |
| Cabc1                      | NM_023341                  | ref Mus musculus chaperone, ABC1 activity of bc1 complex like (S. pombe) (Cabc1), nuclear gene encoding mitochondrial protein, transcript variant 1, mRNA [NM_023341] | -0.46                | 0.007   | 0.179           |
| Enpep                      | NM_007934                  | ref Mus musculus glutamyl aminopeptidase (Enpep), mRNA [NM_007934]                                                                                                    | -0.46                | 0.011   | 0.219           |
| ENSMUST00000027162         | ENSMUST00000027162         | ens inducible T-cell co-stimulator Gene [Source:MGI (curated);Acc:MGI:1858745] [ENSMUST00000027162]                                                                   | -0.46                | 0.014   | 0.253           |
| chr2:31001976-31006755_R   | chr2:31001976-31006755_R   | lincRNA:chr2:31001976-31006755 reverse strand                                                                                                                         | -0.46                | 0.023   | 0.317           |
| Sh3kbp1                    | NM_001135727               | ref Mus musculus SH3-domain kinase binding protein 1 (Sh3kbp1), transcript variant 1, mRNA [NM_001135727]                                                             | -0.46                | 0.009   | 0.199           |
| Tlr11                      | NM_205819                  | ref Mus musculus toll-like receptor 11 (Tlr11), mRNA [NM_205819]                                                                                                      | -0.46                | 0.042   | 0.426           |
| D430040D24Rik              | AK052542                   | gb Mus musculus 13 days embryo lung cDNA, RIKEN full-length enriched library, clone:D430047J20 product:unclassifiable, full insert sequence. [AK052542]               | -0.46                | 0.047   | 0.446           |
| chr7:134620707-134626739_F | chr7:134620707-134626739_F | lincRNA:chr7:134620707-134626739 forward strand                                                                                                                       | -0.46                | 0.019   | 0.290           |
| Mkks                       | NM_021527                  | ref Mus musculus McKusick-Kaufman syndrome protein (Mkks), transcript variant 1, mRNA [NM_021527]                                                                     | -0.46                | 0.023   | 0.319           |
| chr18:84737058-84737644_F  | chr18:84737058-84737644_F  | lincRNA:chr18:84737058-84737644 forward strand                                                                                                                        | -0.46                | 0.020   | 0.302           |
| Sox4                       | NM_009238                  | ref Mus musculus SRY-box containing gene 4 (Sox4), mRNA [NM_009238]                                                                                                   | -0.46                | 0.024   | 0.329           |
| chr9:75316023-75344401_F   | chr9:75316023-75344401_F   | lincRNA:chr9:75316023-75344401 forward strand                                                                                                                         | -0.46                | 0.041   | 0.420           |
| Gm7747                     | XR_032780                  | ref PREDICTED: Mus musculus similar to Ac1158 (LOC665681), misc RNA [XR_032780]                                                                                       | -0.46                | 0.024   | 0.325           |
| Mov10l1                    | NM_031260                  | ref Mus musculus Moloney leukemia virus 10-like 1 (Mov10l1), mRNA [NM_031260]                                                                                         | -0.46                | 0.000   | 0.023           |
| Scn8a                      | NM_001077499               | ref Mus musculus sodium channel, voltage-gated, type VIII, alpha (Scn8a), transcript variant 1, mRNA [NM_001077499]                                                   | -0.46                | 0.002   | 0.091           |
| Ramp1                      | NM_016894                  | ref Mus musculus receptor (calcitonin) activity modifying protein 1 (Ramp1), transcript variant 1, mRNA [NM_016894]                                                   | -0.47                | 0.009   | 0.200           |
| ENSMUST00000099983         | ENSMUST00000099983         | ens Putative uncharacterized protein Fragment [Source:UniProtKB/TrEMBL;Acc:Q9CRL8] [ENSMUST00000099983]                                                               | -0.47                | 0.031   | 0.369           |
| chr13:65610375-65634500_R  | chr13:65610375-65634500_R  | lincRNA:chr13:65610375-65634500 reverse strand                                                                                                                        | -0.47                | 0.042   | 0.423           |
| ENSMUST00000096043         | ENSMUST00000096043         | ens Putative uncharacterized protein [Source:UniProtKB/TrEMBL;Acc:Q8C8M4] [ENSMUST00000096043]                                                                        | -0.47                | 0.004   | 0.130           |
| Olf1449                    | NM_146303                  | ref Mus musculus olfactory receptor 1449 (Olf1449), mRNA [NM_146303]                                                                                                  | -0.47                | 0.047   | 0.446           |
| LOC100044378               | XM_001472125               | ref PREDICTED: Mus musculus similar to CDNA sequence BC061237 (LOC100044378), mRNA [XM_001472125]                                                                     | -0.47                | 0.031   | 0.369           |
| Cd59b                      | NM_181858                  | ref Mus musculus CD59b antigen (Cd59b), mRNA [NM_181858]                                                                                                              | -0.47                | 0.007   | 0.179           |
| Ncr1                       | NM_010746                  | ref Mus musculus natural cytotoxicity triggering receptor 1 (Ncr1), mRNA [NM_010746]                                                                                  | -0.47                | 0.030   | 0.361           |
| Ppp1r16b                   | NM_001159662               | ref Mus musculus protein phosphatase 1, regulatory (inhibitor) subunit 16B (Ppp1r16b), transcript variant 1, mRNA [NM_001159662]                                      | -0.47                | 0.025   | 0.330           |
| Rimklb                     | NM_027664                  | ref Mus musculus ribosomal modification protein rimK-like family member B (Rimklb), mRNA [NM_027664]                                                                  | -0.47                | 0.047   | 0.447           |

Online Supplemental Table IV: Con-STZ Only

| Gene Symbol                | RefSeq                     | Description                                                                                                               | logFC<br>Con-STZ | P-value | Adj.<br>P-value |
|----------------------------|----------------------------|---------------------------------------------------------------------------------------------------------------------------|------------------|---------|-----------------|
| Cspg5                      | NM_001166273               | ref Mus musculus chondroitin sulfate proteoglycan 5 (Cspg5), transcript variant 2, mRNA [NM_001166273]                    | -0.47            | 0.002   | 0.087           |
| Celf5                      | NM_176954                  | ref Mus musculus CUGBP, Elav-like family member 5 (Celf5), mRNA [NM_176954]                                               | -0.47            | 0.050   | 0.457           |
| chr8:47813487-47824869_R   | chr8:47813487-47824869_R   | lincRNA:chr8:47813487-47824869 reverse strand                                                                             | -0.47            | 0.023   | 0.319           |
| Vmn2r112                   | NM_001104575               | ref Mus musculus vomeronasal 2, receptor 112 (Vmn2r112), mRNA [NM_001104575]                                              | -0.47            | 0.009   | 0.198           |
| Gkn3                       | NM_026860                  | ref Mus musculus gastroke 3 (Gkn3), mRNA [NM_026860]                                                                      | -0.47            | 0.003   | 0.116           |
| Gm8956                     | XR_030853                  | ref PREDICTED: Mus musculus similar to ubiquitin-conjugating enzyme E2C (LOC668063), misc RNA [XR_030853]                 | -0.47            | 0.006   | 0.163           |
| ENSMUST00000103608         | ENSMUST00000103608         | ens TRAV14-3 Fragment [Source:UniProtKB/TrEMBL;Acc:Q5R1B3] [ENSMUST00000103608]                                           | -0.47            | 0.027   | 0.343           |
| Lxn                        | NM_016753                  | ref Mus musculus latexin (Lxn), mRNA [NM_016753]                                                                          | -0.47            | 0.042   | 0.423           |
| chr4:135138014-135174889_R | chr4:135138014-135174889_R | lincRNA:chr4:135138014-135174889 reverse strand                                                                           | -0.47            | 0.044   | 0.430           |
| Gapdh                      | NM_008084                  | ref Mus musculus glyceraldehyde-3-phosphate dehydrogenase (Gapdh), mRNA [NM_008084]                                       | -0.47            | 0.002   | 0.085           |
| chr8:67542714-67561694_F   | chr8:67542714-67561694_F   | lincRNA:chr8:67542714-67561694 forward strand                                                                             | -0.47            | 0.036   | 0.393           |
| chr6:127111250-127142925_F | chr6:127111250-127142925_F | lincRNA:chr6:127111250-127142925 forward strand                                                                           | -0.47            | 0.038   | 0.405           |
| LOC676177                  | XM_987925                  | ref PREDICTED: Mus musculus similar to doublesex and mab-3 related transcription factor 8.2 (LOC676177), mRNA [XM_987925] | -0.47            | 0.033   | 0.376           |
| Spna1                      | NM_011465                  | ref Mus musculus spectrin alpha 1 (Spna1), mRNA [NM_011465]                                                               | -0.47            | 0.005   | 0.152           |
| chr14:77077374-77086910_F  | chr14:77077374-77086910_F  | lincRNA:chr14:77077374-77086910 forward strand                                                                            | -0.47            | 0.001   | 0.078           |
| LOC100048891               | XR_031602                  | ref PREDICTED: Mus musculus similar to spermiogenesis specific transcript on the Y1 (LOC100048891), misc RNA [XR_031602]  | -0.48            | 0.048   | 0.452           |
| Aqp11                      | NM_175105                  | ref Mus musculus aquaporin 11 (Aqp11), mRNA [NM_175105]                                                                   | -0.48            | 0.025   | 0.330           |
| Gm4720                     | XM_001481217               | ref PREDICTED: Mus musculus similar to ORF1 (LOC100043907), mRNA [XM_001481217]                                           | -0.48            | 0.010   | 0.209           |
| chr8:89996710-90049453_F   | chr8:89996710-90049453_F   | lincRNA:chr8:89996710-90049453 forward strand                                                                             | -0.48            | 0.011   | 0.223           |
| Pipox                      | NM_008952                  | ref Mus musculus pipecolic acid oxidase (Pipox), mRNA [NM_008952]                                                         | -0.48            | 0.033   | 0.377           |
| Gbp3                       | NM_018734                  | ref Mus musculus guanylate binding protein 3 (Gbp3), mRNA [NM_018734]                                                     | -0.48            | 0.040   | 0.413           |
| Ces3                       | NM_053200                  | ref Mus musculus carboxylesterase 3 (Ces3), mRNA [NM_053200]                                                              | -0.48            | 0.045   | 0.439           |
| Rad51c                     | ENSMUST00000067692         | ens RAD51 homolog c (S. cerevisiae) Gene [Source:MGI (curated);Acc:MGI:2150020] [ENSMUST00000067692]                      | -0.48            | 0.009   | 0.206           |
| Ccdc138                    | NM_001162956               | ref Mus musculus coiled-coil domain containing 138 (Ccdc138), mRNA [NM_001162956]                                         | -0.48            | 0.001   | 0.053           |
| Arl6ip6                    | NM_022989                  | ref Mus musculus ADP-ribosylation factor-like 6 interacting protein 6 (Arl6ip6), mRNA [NM_022989]                         | -0.48            | 0.000   | 0.023           |
| Larp7                      | NM_138593                  | ref Mus musculus La ribonucleoprotein domain family, member 7 (Larp7), mRNA [NM_138593]                                   | -0.48            | 0.045   | 0.439           |
| chr2:10237649-10287591_F   | chr2:10237649-10287591_F   | lincRNA:chr2:10237649-10287591 forward strand                                                                             | -0.48            | 0.037   | 0.398           |
| chr15:61153994-61285386_F  | chr15:61153994-61285386_F  | lincRNA:chr15:61153994-61285386 forward strand                                                                            | -0.48            | 0.004   | 0.131           |
| Nik                        | NM_008702                  | ref Mus musculus nemo like kinase (Nik), mRNA [NM_008702]                                                                 | -0.48            | 0.001   | 0.070           |

Online Supplemental Table IV: Con-STZ Only

| Gene Symbol                 | RefSeq                      | Description                                                                                                                                                               | logFC<br>Con-STZ | P-value | Adj.<br>P-value |
|-----------------------------|-----------------------------|---------------------------------------------------------------------------------------------------------------------------------------------------------------------------|------------------|---------|-----------------|
| Mpzl3                       | NM_001093749                | ref Mus musculus myelin protein zero-like 3 (Mpzl3), transcript variant 2, mRNA [NM_001093749]                                                                            | -0.48            | 0.015   | 0.266           |
| chr13:28490070-28492645_R   | chr13:28490070-28492645_R   | lincRNA:chr13:28490070-28492645 reverse strand                                                                                                                            | -0.48            | 0.008   | 0.186           |
| Vil1                        | NM_009509                   | ref Mus musculus villin 1 (Vil1), mRNA [NM_009509]                                                                                                                        | -0.48            | 0.028   | 0.348           |
| Tnfsf10                     | NM_009425                   | ref Mus musculus tumor necrosis factor (ligand) superfamily, member 10 (Tnfsf10), mRNA [NM_009425]                                                                        | -0.48            | 0.039   | 0.409           |
| Itga1                       | NM_001033228                | ref Mus musculus integrin alpha 1 (Itga1), mRNA [NM_001033228]                                                                                                            | -0.49            | 0.011   | 0.225           |
| Ube2c                       | NM_026785                   | ref Mus musculus ubiquitin-conjugating enzyme E2C (Ube2c), mRNA [NM_026785]                                                                                               | -0.49            | 0.023   | 0.322           |
| Arntl                       | NM_007489                   | ref Mus musculus aryl hydrocarbon receptor nuclear translocator-like (Arntl), mRNA [NM_007489]                                                                            | -0.49            | 0.047   | 0.445           |
| AI593442                    | NM_178906                   | ref Mus musculus expressed sequence AI593442 (AI593442), transcript variant 2, mRNA [NM_178906]                                                                           | -0.49            | 0.037   | 0.400           |
| Mlxip1                      | NM_021455                   | ref Mus musculus MLX interacting protein-like (Mlxip1), mRNA [NM_021455]                                                                                                  | -0.49            | 0.000   | 0.029           |
| Trim7                       | NM_053166                   | ref Mus musculus tripartite motif-containing 7 (Trim7), mRNA [NM_053166]                                                                                                  | -0.49            | 0.001   | 0.068           |
| chr9:55925993-55926583_R    | chr9:55925993-55926583_R    | lincRNA:chr9:55925993-55926583 reverse strand                                                                                                                             | -0.49            | 0.023   | 0.320           |
| Tgtp2                       | NM_001145164                | ref Mus musculus T-cell specific GTPase 2 (Tgtp2), mRNA [NM_001145164]                                                                                                    | -0.49            | 0.009   | 0.200           |
| chr11:102983499-102994170_R | chr11:102983499-102994170_R | lincRNA:chr11:102983499-102994170 reverse strand                                                                                                                          | -0.49            | 0.003   | 0.109           |
| Pabpc6                      | NM_001163836                | ref Mus musculus poly(A) binding protein, cytoplasmic 6 (Pabpc6), mRNA [NM_001163836]                                                                                     | -0.49            | 0.009   | 0.203           |
| Mrps14                      | NM_025474                   | ref Mus musculus mitochondrial ribosomal protein S14 (Mrps14), nuclear gene encoding mitochondrial protein, mRNA [NM_025474]                                              | -0.49            | 0.018   | 0.280           |
| Hbb-b1                      | NM_008220                   | ref Mus musculus hemoglobin, beta adult major chain (Hbb-b1), mRNA [NM_008220]                                                                                            | -0.49            | 0.010   | 0.208           |
| chr4:146345650-146356650_F  | chr4:146345650-146356650_F  | lincRNA:chr4:146345650-146356650 forward strand                                                                                                                           | -0.49            | 0.046   | 0.443           |
| Cd1d1                       | NM_007639                   | ref Mus musculus CD1d1 antigen (Cd1d1), mRNA [NM_007639]                                                                                                                  | -0.49            | 0.004   | 0.129           |
| Slc25a26                    | NM_026255                   | ref Mus musculus solute carrier family 25 (mitochondrial carrier, phosphate carrier), member 26 (Slc25a26), nuclear gene encoding mitochondrial protein, mRNA [NM_026255] | -0.49            | 0.011   | 0.221           |
| Zmynd19                     | NM_026021                   | ref Mus musculus zinc finger, MYND domain containing 19 (Zmynd19), mRNA [NM_026021]                                                                                       | -0.49            | 0.007   | 0.181           |
| 6530418L21Rik               | NM_175398                   | ref Mus musculus RIKEN cDNA 6530418L21 gene (6530418L21Rik), transcript variant 1, mRNA [NM_175398]                                                                       | -0.49            | 0.008   | 0.183           |
| Cngb3                       | NM_013927                   | ref Mus musculus cyclic nucleotide gated channel beta 3 (Cngb3), mRNA [NM_013927]                                                                                         | -0.49            | 0.042   | 0.425           |
| chr12:89519675-89533975_F   | chr12:89519675-89533975_F   | lincRNA:chr12:89519675-89533975 forward strand                                                                                                                            | -0.50            | 0.017   | 0.280           |
| chr7:69005291-69007813_R    | chr7:69005291-69007813_R    | lincRNA:chr7:69005291-69007813 reverse strand                                                                                                                             | -0.50            | 0.015   | 0.260           |
| Mia1                        | NM_019394                   | ref Mus musculus melanoma inhibitory activity 1 (Mia1), mRNA [NM_019394]                                                                                                  | -0.50            | 0.024   | 0.326           |
| ENSMUST00000033744          | ENSMUST00000033744          | ens ATPase, Ca++ transporting, plasma membrane 3 Gene [Source:MGI (curated);Acc:MGI:1347353] [ENSMUST00000033744]                                                         | -0.50            | 0.029   | 0.355           |
| Dcaf12l2                    | NM_175539                   | ref Mus musculus DDB1 and CUL4 associated factor 12-like 2 (Dcaf12l2), mRNA [NM_175539]                                                                                   | -0.50            | 0.012   | 0.236           |
| Olf220                      | NM_207694                   | ref Mus musculus olfactory receptor 220 (Olf220), mRNA [NM_207694]                                                                                                        | -0.50            | 0.011   | 0.224           |
| Myh6                        | NM_001164171                | ref Mus musculus myosin, heavy polypeptide 6, cardiac muscle, alpha (Myh6), transcript variant 1, mRNA [NM_001164171]                                                     | -0.50            | 0.004   | 0.129           |

| Online Supplemental Table IV: Con-STZ Only |                            |                                                                                                                                                       |                  |         |                 |
|--------------------------------------------|----------------------------|-------------------------------------------------------------------------------------------------------------------------------------------------------|------------------|---------|-----------------|
| Gene Symbol                                | RefSeq                     | Description                                                                                                                                           | logFC<br>Con-STZ | P-value | Adj.<br>P-value |
| Gm4934                                     | NM_001167593               | ref Mus musculus predicted gene 4934 (Gm4934), mRNA [NM_001167593]                                                                                    | -0.50            | 0.024   | 0.329           |
| chr13:78341864-78375825_R                  | chr13:78341864-78375825_R  | lincRNA:chr13:78341864-78375825 reverse strand                                                                                                        | -0.50            | 0.008   | 0.192           |
| ENSMUST00000097692                         | ENSMUST00000097692         | ens Putative uncharacterized protein [Source:UniProtKB/TrEMBL;Acc:Q9D1Y2] [ENSMUST00000097692]                                                        | -0.50            | 0.002   | 0.088           |
| Chchd7                                     | ENSMUST00000119403         | ens coiled-coil-helix-coiled-coil-helix domain containing 7 Gene [Source:MGI (curated);Acc:MGI:1913683] [ENSMUST00000119403]                          | -0.50            | 0.001   | 0.047           |
| Rgs6                                       | NM_015812                  | ref Mus musculus regulator of G-protein signaling 6 (Rgs6), mRNA [NM_015812]                                                                          | -0.50            | 0.000   | 0.017           |
| chr17:87674225-87682154_R                  | chr17:87674225-87682154_R  | lincRNA:chr17:87674225-87682154 reverse strand                                                                                                        | -0.50            | 0.034   | 0.383           |
| Adcy8                                      | NM_009623                  | ref Mus musculus adenylate cyclase 8 (Adcy8), mRNA [NM_009623]                                                                                        | -0.50            | 0.043   | 0.428           |
| Gm8860                                     | XR_031014                  | ref PREDICTED: Mus musculus similar to ribosomal protein (LOC667886), misc RNA [XR_031014]                                                            | -0.50            | 0.025   | 0.332           |
| chr8:12535648-12544923_R                   | chr8:12535648-12544923_R   | lincRNA:chr8:12535648-12544923 reverse strand                                                                                                         | -0.50            | 0.029   | 0.357           |
| Pax5                                       | NM_008782                  | ref Mus musculus paired box gene 5 (Pax5), mRNA [NM_008782]                                                                                           | -0.50            | 0.030   | 0.366           |
| Tff2                                       | NM_009363                  | ref Mus musculus trefoil factor 2 (spasmolytic protein 1) (Tff2), mRNA [NM_009363]                                                                    | -0.50            | 0.013   | 0.245           |
| ENSMUST00000103306                         | ENSMUST00000103306         | Unknown                                                                                                                                               | -0.51            | 0.004   | 0.141           |
| ENSMUST00000098605                         | ENSMUST00000098605         | ens Putative uncharacterized protein [Source:UniProtKB/TrEMBL;Acc:Q3UPY1] [ENSMUST00000098605]                                                        | -0.51            | 0.015   | 0.259           |
| Tuba8                                      | NM_017379                  | ref Mus musculus tubulin, alpha 8 (Tuba8), mRNA [NM_017379]                                                                                           | -0.51            | 0.025   | 0.331           |
| chr2:176908707-176991202_R                 | chr2:176908707-176991202_R | lincRNA:chr2:176908707-176991202 reverse strand                                                                                                       | -0.51            | 0.017   | 0.280           |
| Sesn3                                      | NM_030261                  | ref Mus musculus sestrin 3 (Sesn3), mRNA [NM_030261]                                                                                                  | -0.51            | 0.010   | 0.215           |
| LOC100040905                               | XM_001475464               | ref PREDICTED: Mus musculus similar to cyclic nucleotide gated channel beta 1 (LOC100040905), mRNA [XM_001475464]                                     | -0.51            | 0.037   | 0.396           |
| Skint7                                     | NM_177818                  | ref Mus musculus selection and upkeep of intraepithelial T cells 7 (Skint7), transcript variant 2, mRNA [NM_177818]                                   | -0.51            | 0.001   | 0.058           |
| AI426330                                   | AK133434                   | gb Mus musculus adult male testis cDNA, RIKEN full-length enriched library, clone:4933430M05 product:unclassifiable, full insert sequence. [AK133434] | -0.51            | 0.000   | 0.030           |
| Ms4a4c                                     | NM_029499                  | ref Mus musculus membrane-spanning 4-domains, subfamily A, member 4C (Ms4a4c), mRNA [NM_029499]                                                       | -0.51            | 0.000   | 0.032           |
| Nlr1                                       | NM_001163743               | ref Mus musculus NLR family member X1 (Nlr1), transcript variant 1, mRNA [NM_001163743]                                                               | -0.51            | 0.036   | 0.392           |
| chr7:86651948-86675223_R                   | chr7:86651948-86675223_R   | lincRNA:chr7:86651948-86675223 reverse strand                                                                                                         | -0.51            | 0.037   | 0.398           |
| Gm2820                                     | XM_001474152               | ref PREDICTED: Mus musculus hypothetical protein LOC100040520 (LOC100040520), mRNA [XM_001474152]                                                     | -0.51            | 0.008   | 0.192           |
| Slc46a2                                    | NM_021053                  | ref Mus musculus solute carrier family 46, member 2 (Slc46a2), mRNA [NM_021053]                                                                       | -0.51            | 0.005   | 0.154           |
| Cdh20                                      | NM_011800                  | ref Mus musculus cadherin 20 (Cdh20), mRNA [NM_011800]                                                                                                | -0.51            | 0.003   | 0.124           |
| Lrrc3b                                     | NM_146052                  | ref Mus musculus leucine rich repeat containing 3B (Lrrc3b), mRNA [NM_146052]                                                                         | -0.51            | 0.007   | 0.176           |
| Sim2                                       | NM_011377                  | ref Mus musculus single-minded homolog 2 (Drosophila) (Sim2), mRNA [NM_011377]                                                                        | -0.51            | 0.045   | 0.441           |
| Fam84b                                     | NM_001162926               | ref Mus musculus family with sequence similarity 84, member B (Fam84b), mRNA [NM_001162926]                                                           | -0.51            | 0.007   | 0.182           |

| Online Supplemental Table IV: Con-STZ Only |                            |                                                                                                                                                         |                  |         |                 |
|--------------------------------------------|----------------------------|---------------------------------------------------------------------------------------------------------------------------------------------------------|------------------|---------|-----------------|
| Gene Symbol                                | RefSeq                     | Description                                                                                                                                             | logFC<br>Con-STZ | P-value | Adj.<br>P-value |
| chr9:43921700-43939600_F                   | chr9:43921700-43939600_F   | lincRNA:chr9:43921700-43939600 forward strand                                                                                                           | -0.51            | 0.006   | 0.157           |
| Egflam                                     | NM_178748                  | ref Mus musculus EGF-like, fibronectin type III and laminin G domains (Egflam), mRNA [NM_178748]                                                        | -0.51            | 0.020   | 0.295           |
| Hist1h2an                                  | NM_178184                  | ref Mus musculus histone cluster 1, H2an (Hist1h2an), mRNA [NM_178184]                                                                                  | -0.51            | 0.002   | 0.096           |
| chr2:143992000-143992611_F                 | chr2:143992000-143992611_F | lincRNA:chr2:143992000-143992611 forward strand                                                                                                         | -0.51            | 0.006   | 0.162           |
| chr3:9401052-9415202_F                     | chr3:9401052-9415202_F     | lincRNA:chr3:9401052-9415202 forward strand                                                                                                             | -0.52            | 0.008   | 0.194           |
| Gm10586                                    | XM_001480373               | ref PREDICTED: Mus musculus hypothetical protein LOC100043589 (LOC100043589), mRNA [XM_001480373]                                                       | -0.52            | 0.000   | 0.036           |
| Ccl1                                       | NM_011329                  | ref Mus musculus chemokine (C-C motif) ligand 1 (Ccl1), mRNA [NM_011329]                                                                                | -0.52            | 0.006   | 0.166           |
| 2310040G24Rik                              | XM_001479091               | ref PREDICTED: Mus musculus RIKEN cDNA 2310040G24 gene (2310040G24Rik), mRNA [XM_001479091]                                                             | -0.52            | 0.006   | 0.157           |
| Shisa2                                     | NM_145463                  | ref Mus musculus shisa homolog 2 (Xenopus laevis) (Shisa2), mRNA [NM_145463]                                                                            | -0.52            | 0.017   | 0.278           |
| chr13:28490070-28492645_R                  | chr13:28490070-28492645_R  | lincRNA:chr13:28490070-28492645 reverse strand                                                                                                          | -0.52            | 0.046   | 0.443           |
| chr14:77042348-77042645_R                  | chr14:77042348-77042645_R  | lincRNA:chr14:77042348-77042645 reverse strand                                                                                                          | -0.52            | 0.022   | 0.312           |
| ENSMUST00000103352                         | ENSMUST00000103352         | gb Mus musculus immunoglobulin kappa light chain variable region mRNA, clone MRL1-56, partial cds. [U19317]                                             | -0.52            | 0.021   | 0.308           |
| Hnrnp3                                     | NM_001079824               | ref Mus musculus heterogeneous nuclear ribonucleoprotein H3 (Hnrnp3), mRNA [NM_001079824]                                                               | -0.52            | 0.028   | 0.348           |
| Magix                                      | NM_018832                  | ref Mus musculus MAGI family member, X-linked (Magix), mRNA [NM_018832]                                                                                 | -0.52            | 0.008   | 0.192           |
| Smok2a                                     | NM_013741                  | ref Mus musculus sperm motility kinase 2A (Smok2a), mRNA [NM_013741]                                                                                    | -0.53            | 0.049   | 0.454           |
| Spin2                                      | NM_001005370               | ref Mus musculus spindlin family, member 2 (Spin2), mRNA [NM_001005370]                                                                                 | -0.53            | 0.027   | 0.344           |
| Ankrd35                                    | NM_001081139               | ref Mus musculus ankyrin repeat domain 35 (Ankrd35), mRNA [NM_001081139]                                                                                | -0.53            | 0.001   | 0.075           |
| 2310015D24Rik                              | XM_001474641               | ref PREDICTED: Mus musculus RIKEN cDNA 2310015D24 gene (2310015D24Rik), mRNA [XM_001474641]                                                             | -0.53            | 0.022   | 0.310           |
| Cd27                                       | NM_001033126               | ref Mus musculus CD27 antigen (Cd27), transcript variant 1, mRNA [NM_001033126]                                                                         | -0.53            | 0.019   | 0.288           |
| Zmat1                                      | NM_175446                  | ref Mus musculus zinc finger, matrin type 1 (Zmat1), mRNA [NM_175446]                                                                                   | -0.53            | 0.046   | 0.441           |
| Klhl32                                     | NM_001163020               | ref Mus musculus kelch-like 32 (Drosophila) (Klhl32), transcript variant 1, mRNA [NM_001163020]                                                         | -0.53            | 0.006   | 0.159           |
| chr1:158979050-159007700_F                 | chr1:158979050-159007700_F | lincRNA:chr1:158979050-159007700 forward strand                                                                                                         | -0.54            | 0.021   | 0.302           |
| Lpin1                                      | NM_001130412               | ref Mus musculus lipin 1 (Lpin1), transcript variant 3, mRNA [NM_001130412]                                                                             | -0.54            | 0.001   | 0.065           |
| D7Wsu130e                                  | AK081893                   | gb Mus musculus 16 days embryo head cDNA, RIKEN full-length enriched library, clone:C130085H20 product:unclassifiable, full insert sequence. [AK081893] | -0.54            | 0.004   | 0.135           |
| Gm5863                                     | XM_001487781               | ref PREDICTED: Mus musculus predicted gene, EG545741, transcript variant 1 (EG545741), mRNA [XM_001487781]                                              | -0.54            | 0.000   | 0.041           |
| Arl4d                                      | NM_025404                  | ref Mus musculus ADP-ribosylation factor-like 4D (Arl4d), mRNA [NM_025404]                                                                              | -0.54            | 0.001   | 0.052           |
| 4930503E14Rik                              | NM_029131                  | ref Mus musculus RIKEN cDNA 4930503E14 gene (4930503E14Rik), mRNA [NM_029131]                                                                           | -0.54            | 0.042   | 0.423           |
| Ndc80                                      | NM_023294                  | ref Mus musculus NDC80 homolog, kinetochore complex component (S. cerevisiae) (Ndc80), mRNA [NM_023294]                                                 | -0.54            | 0.028   | 0.349           |



Online Supplemental Table IV: Con-STZ Only

| Gene Symbol                       | RefSeq                     | Description                                                                                                                                               | logFC<br>Con-STZ | P-value | Adj.<br>P-value |
|-----------------------------------|----------------------------|-----------------------------------------------------------------------------------------------------------------------------------------------------------|------------------|---------|-----------------|
| <b>Zdhhc22</b>                    | NM_001080943               | ref Mus musculus zinc finger, DHHC-type containing 22 (Zdhhc22), mRNA [NM_001080943]                                                                      | -0.54            | 0.050   | 0.457           |
| <b>Tnfaip2</b>                    | NM_009396                  | ref Mus musculus tumor necrosis factor, alpha-induced protein 2 (Tnfaip2), mRNA [NM_009396]                                                               | -0.54            | 0.021   | 0.309           |
| <b>chr12:74135916-74142780_R</b>  | chr12:74135916-74142780_R  | lincRNA:chr12:74135916-74142780 reverse strand                                                                                                            | -0.54            | 0.048   | 0.452           |
| <b>Arl4d</b>                      | NM_025404                  | ref Mus musculus ADP-ribosylation factor-like 4D (Arl4d), mRNA [NM_025404]                                                                                | -0.54            | 0.002   | 0.094           |
| <b>chr8:90048940-90049461_F</b>   | chr8:90048940-90049461_F   | lincRNA:chr8:90048940-90049461 forward strand                                                                                                             | -0.54            | 0.045   | 0.436           |
| <b>chr10:69842010-69842465_F</b>  | chr10:69842010-69842465_F  | lincRNA:chr10:69842010-69842465 forward strand                                                                                                            | -0.54            | 0.026   | 0.340           |
| <b>Tet1</b>                       | NM_027384                  | ref Mus musculus tet oncogene 1 (Tet1), mRNA [NM_027384]                                                                                                  | -0.54            | 0.013   | 0.241           |
| <b>Dennd4a</b>                    | AK158840                   | gb Mus musculus visual cortex cDNA, RIKEN full-length enriched library, clone:K430341N21 product:hypothetical protein, full insert sequence. [AK158840]   | -0.54            | 0.001   | 0.059           |
| <b>Exo1</b>                       | NM_012012                  | ref Mus musculus exonuclease 1 (Exo1), mRNA [NM_012012]                                                                                                   | -0.54            | 0.015   | 0.264           |
| <b>4930563J15Rik</b>              | AK030044                   | gb Mus musculus adult male testis cDNA, RIKEN full-length enriched library, clone:4932416O05 product:unclassifiable, full insert sequence. [AK030044]     | -0.54            | 0.009   | 0.201           |
| <b>Lrp2bp</b>                     | NM_026278                  | ref Mus musculus Lrp2 binding protein (Lrp2bp), mRNA [NM_026278]                                                                                          | -0.54            | 0.040   | 0.415           |
| <b>Ubtf</b>                       | NM_011551                  | ref Mus musculus upstream binding transcription factor, RNA polymerase I (Ubtf), transcript variant 1, mRNA [NM_011551]                                   | -0.55            | 0.000   | 0.036           |
| <b>ENSMUST00000113902</b>         | ENSMUST00000113902         | ens RIKEN cDNA 4932442L08 gene Gene [Source:MGI Symbol;Acc:MGI:1921682] [ENSMUST00000113902]                                                              | -0.55            | 0.041   | 0.418           |
| <b>LOC100047586</b>               | XM_001478463               | ref PREDICTED: Mus musculus similar to Ly6/Plaur domain containing 5 (LOC100047586), mRNA [XM_001478463]                                                  | -0.55            | 0.008   | 0.194           |
| <b>chr12:81217572-81233910_R</b>  | chr12:81217572-81233910_R  | lincRNA:chr12:81217572-81233910 reverse strand                                                                                                            | -0.55            | 0.000   | 0.043           |
| <b>Gng13</b>                      | NM_022422                  | ref Mus musculus guanine nucleotide binding protein (G protein), gamma 13 (Gng13), mRNA [NM_022422]                                                       | -0.55            | 0.030   | 0.365           |
| <b>Gm3240</b>                     | XM_001473170               | ref PREDICTED: Mus musculus hypothetical protein LOC100044944 (LOC100044944), mRNA [XM_001473170]                                                         | -0.55            | 0.020   | 0.300           |
| <b>chrX:148819227-148844227_F</b> | chrX:148819227-148844227_F | lincRNA:chrX:148819227-148844227 forward strand                                                                                                           | -0.55            | 0.014   | 0.250           |
| <b>Al663975</b>                   | AK033778                   | gb Mus musculus adult male epididymis cDNA, RIKEN full-length enriched library, clone:9230106H08 product:unclassifiable, full insert sequence. [AK033778] | -0.55            | 0.001   | 0.048           |
| <b>chr19:40663924-40669352_F</b>  | chr19:40663924-40669352_F  | lincRNA:chr19:40663924-40669352 forward strand                                                                                                            | -0.55            | 0.018   | 0.283           |
| <b>Ccdc30</b>                     | NM_029286                  | ref Mus musculus coiled-coil domain containing 30 (Ccdc30), mRNA [NM_029286]                                                                              | -0.55            | 0.034   | 0.384           |
| <b>Clmn</b>                       | NM_053155                  | ref Mus musculus calmin (Clmn), transcript variant 1, mRNA [NM_053155]                                                                                    | -0.55            | 0.011   | 0.217           |
| <b>Gli1</b>                       | NM_010296                  | ref Mus musculus GLI-Kruppel family member GLI1 (Gli1), mRNA [NM_010296]                                                                                  | -0.55            | 0.027   | 0.344           |
| <b>Cntln</b>                      | NM_177385                  | ref Mus musculus centlein, centrosomal protein (Cntln), transcript variant 2, mRNA [NM_177385]                                                            | -0.55            | 0.006   | 0.161           |
| <b>Tnfaip811</b>                  | NM_025566                  | ref Mus musculus tumor necrosis factor, alpha-induced protein 8-like 1 (Tnfaip811), mRNA [NM_025566]                                                      | -0.56            | 0.004   | 0.142           |
| <b>Agtr2</b>                      | NM_007429                  | ref Mus musculus angiotensin II receptor, type 2 (Agtr2), mRNA [NM_007429]                                                                                | -0.56            | 0.010   | 0.208           |
| <b>Col6a6</b>                     | NM_001102607               | ref Mus musculus collagen, type VI, alpha 6 (Col6a6), transcript variant 1, mRNA [NM_001102607]                                                           | -0.56            | 0.026   | 0.337           |

| Online Supplemental Table IV: Con-STZ Only |                             |                                                                                                                              |                  |         |                 |
|--------------------------------------------|-----------------------------|------------------------------------------------------------------------------------------------------------------------------|------------------|---------|-----------------|
| Gene Symbol                                | RefSeq                      | Description                                                                                                                  | logFC<br>Con-STZ | P-value | Adj.<br>P-value |
| chr4:115639749-115641787_R                 | chr4:115639749-115641787_R  | lincRNA:chr4:115639749-115641787 reverse strand                                                                              | -0.56            | 0.023   | 0.318           |
| chr11:22510175-22522025_R                  | chr11:22510175-22522025_R   | lincRNA:chr11:22510175-22522025 reverse strand                                                                               | -0.56            | 0.009   | 0.204           |
| E030037K03Rik                              | NM_001177349                | ref Mus musculus RIKEN cDNA E030037K03 gene (E030037K03Rik), transcript variant 1, mRNA [NM_001177349]                       | -0.56            | 0.039   | 0.408           |
| Myct1                                      | NM_026793                   | ref Mus musculus myc target 1 (Myct1), mRNA [NM_026793]                                                                      | -0.56            | 0.003   | 0.106           |
| Olfr676                                    | NM_147095                   | ref Mus musculus olfactory receptor 676 (Olfr676), mRNA [NM_147095]                                                          | -0.56            | 0.043   | 0.429           |
| chr6:52046805-52072744_F                   | chr6:52046805-52072744_F    | lincRNA:chr6:52046805-52072744 forward strand                                                                                | -0.56            | 0.004   | 0.140           |
| Pex10                                      | NM_001042407                | ref Mus musculus peroxisomal biogenesis factor 10 (Pex10), mRNA [NM_001042407]                                               | -0.56            | 0.028   | 0.351           |
| chr8:89996710-90049453_F                   | chr8:89996710-90049453_F    | lincRNA:chr8:89996710-90049453 forward strand                                                                                | -0.57            | 0.012   | 0.229           |
| Lrba                                       | NM_030695                   | ref Mus musculus LPS-responsive beige-like anchor (Lrba), transcript variant 1, mRNA [NM_030695]                             | -0.57            | 0.000   | 0.032           |
| Lactbl1                                    | ENSMUST00000094599          | ref PREDICTED: Mus musculus cDNA sequence BC029684 (BC029684), mRNA [XM_205950]                                              | -0.57            | 0.003   | 0.126           |
| Nrn1                                       | NM_153529                   | ref Mus musculus neuritin 1 (Nm1), mRNA [NM_153529]                                                                          | -0.57            | 0.026   | 0.338           |
| LOC634100                                  | ENSMUST00000103511          | Unknown                                                                                                                      | -0.57            | 0.005   | 0.146           |
| chr13:108577843-108679708_R                | chr13:108577843-108679708_R | lincRNA:chr13:108577843-108679708 reverse strand                                                                             | -0.57            | 0.004   | 0.138           |
| BC030867                                   | NM_153544                   | ref Mus musculus cDNA sequence BC030867 (BC030867), mRNA [NM_153544]                                                         | -0.57            | 0.012   | 0.234           |
| Pcdh15                                     | NM_001142743                | ref Mus musculus protocadherin 15 (Pcdh15), transcript variant J, mRNA [NM_001142743]                                        | -0.57            | 0.024   | 0.327           |
| Pitpnm3                                    | NM_001024927                | ref Mus musculus PITPNM family member 3 (Pitpnm3), transcript variant 1, mRNA [NM_001024927]                                 | -0.57            | 0.017   | 0.278           |
| Car5b                                      | NM_181315                   | ref Mus musculus carbonic anhydrase 5b, mitochondrial (Car5b), nuclear gene encoding mitochondrial protein, mRNA [NM_181315] | -0.57            | 0.011   | 0.225           |
| Gm5887                                     | NM_001034903                | ref Mus musculus predicted gene 5887 (Gm5887), mRNA [NM_001034903]                                                           | -0.57            | 0.005   | 0.154           |
| LOC100048858                               | XM_001472990                | ref PREDICTED: Mus musculus similar to Ribosomal protein S6 kinase, polypeptide 2 (LOC100048858), mRNA [XM_001472990]        | -0.57            | 0.008   | 0.192           |
| LOC641199                                  | XM_918544                   | ref PREDICTED: Mus musculus similar to preserine protease (LOC641199), mRNA [XM_918544]                                      | -0.57            | 0.031   | 0.367           |
| Gpt2                                       | NM_173866                   | ref Mus musculus glutamic pyruvate transaminase (alanine aminotransferase) 2 (Gpt2), mRNA [NM_173866]                        | -0.57            | 0.001   | 0.070           |
| Hist1h2ag                                  | NM_178186                   | ref Mus musculus histone cluster 1, H2ag (Hist1h2ag), mRNA [NM_178186]                                                       | -0.58            | 0.020   | 0.301           |
| Plk5                                       | NM_183152                   | ref Mus musculus polo-like kinase 5 (Drosophila) (Plk5), mRNA [NM_183152]                                                    | -0.58            | 0.003   | 0.119           |
| A2bp1                                      | NM_021477                   | ref Mus musculus ataxin 2 binding protein 1 (A2bp1), transcript variant 2, mRNA [NM_021477]                                  | -0.58            | 0.014   | 0.251           |
| chr1:182180931-182186106_F                 | chr1:182180931-182186106_F  | lincRNA:chr1:182180931-182186106 forward strand                                                                              | -0.58            | 0.041   | 0.419           |
| Pde4a                                      | NM_183408                   | ref Mus musculus phosphodiesterase 4A, cAMP specific (Pde4a), transcript variant 5, mRNA [NM_183408]                         | -0.58            | 0.021   | 0.309           |
| Tk1                                        | NM_009387                   | ref Mus musculus thymidine kinase 1 (Tk1), mRNA [NM_009387]                                                                  | -0.58            | 0.036   | 0.394           |
| Dppa2                                      | NM_028615                   | ref Mus musculus developmental pluripotency associated 2 (Dppa2), mRNA [NM_028615]                                           | -0.58            | 0.010   | 0.208           |
| Gm5330                                     | XM_357735                   | ref PREDICTED: Mus musculus predicted gene, EG384596 (EG384596), mRNA [XM_357735]                                            | -0.58            | 0.042   | 0.422           |

Online Supplemental Table IV: Con-STZ Only

| Gene Symbol                | RefSeq                     | Description                                                                                                                                             | logFC<br>Con-<br>STZ | P-value | Adj.<br>P-value |
|----------------------------|----------------------------|---------------------------------------------------------------------------------------------------------------------------------------------------------|----------------------|---------|-----------------|
| Mapk8                      | NM_016700                  | ref Mus musculus mitogen-activated protein kinase 8 (Mapk8), mRNA [NM_016700]                                                                           | -0.58                | 0.034   | 0.383           |
| chr7:28588159-28617009_R   | chr7:28588159-28617009_R   | lincRNA:chr7:28588159-28617009 reverse strand                                                                                                           | -0.58                | 0.029   | 0.358           |
| Espn                       | NM_207687                  | ref Mus musculus espin (Espn), transcript variant 1, mRNA [NM_207687]                                                                                   | -0.58                | 0.007   | 0.171           |
| chr18:35985999-35986376_R  | chr18:35985999-35986376_R  | lincRNA:chr18:35985999-35986376 reverse strand                                                                                                          | -0.58                | 0.001   | 0.073           |
| 9030617O03Rik              | NM_145448                  | ref Mus musculus RIKEN cDNA 9030617O03 gene (9030617O03Rik), mRNA [NM_145448]                                                                           | -0.58                | 0.001   | 0.046           |
| chr4:136871882-136872469_R | chr4:136871882-136872469_R | lincRNA:chr4:136871882-136872469 reverse strand                                                                                                         | -0.59                | 0.017   | 0.274           |
| Prkg2                      | NM_008926                  | ref Mus musculus protein kinase, cGMP-dependent, type II (Prkg2), mRNA [NM_008926]                                                                      | -0.59                | 0.001   | 0.053           |
| 4930432B10Rik              | AK015283                   | gb Mus musculus adult male testis cDNA, RIKEN full-length enriched library, clone:4930432B10 product:unclassifiable, full insert sequence. [AK015283]   | -0.59                | 0.022   | 0.312           |
| 5430405H02Rik              | AK017271                   | gb Mus musculus 6 days neonate head cDNA, RIKEN full-length enriched library, clone:5430405H02 product:unclassifiable, full insert sequence. [AK017271] | -0.59                | 0.044   | 0.431           |
| Auts2                      | NM_177047                  | ref Mus musculus autism susceptibility candidate 2 (Auts2), mRNA [NM_177047]                                                                            | -0.59                | 0.027   | 0.345           |
| Galm                       | NM_176963                  | ref Mus musculus galactose mutarotase (Galm), mRNA [NM_176963]                                                                                          | -0.59                | 0.008   | 0.193           |
| Gm10270                    | XM_001474128               | ref PREDICTED: Mus musculus similar to put. HMG-17 protein (LOC100040129), mRNA [XM_001474128]                                                          | -0.59                | 0.034   | 0.386           |
| Gm15855                    | XR_002073                  | ref PREDICTED: Mus musculus similar to killer cell lectin-like receptor subfamily A member 29 (LOC667769), misc RNA [XR_002073]                         | -0.60                | 0.040   | 0.414           |
| chr4:126710640-126721240_R | chr4:126710640-126721240_R | lincRNA:chr4:126710640-126721240 reverse strand                                                                                                         | -0.60                | 0.010   | 0.211           |
| ENSMUST00000100177         | ENSMUST00000100177         | ens RIKEN cDNA 2310015D24 gene Gene [Source:MGI Symbol;Acc:MGI:1917350] [ENSMUST00000100177]                                                            | -0.60                | 0.003   | 0.118           |
| Mest                       | NM_008590                  | ref Mus musculus mesoderm specific transcript (Mest), mRNA [NM_008590]                                                                                  | -0.60                | 0.016   | 0.274           |
| chr18:38776580-38841080_F  | chr18:38776580-38841080_F  | lincRNA:chr18:38776580-38841080 forward strand                                                                                                          | -0.60                | 0.034   | 0.383           |
| 4833419G08Rik              | XM_994760                  | ref PREDICTED: Mus musculus RIKEN cDNA 4833419G08 gene (4833419G08Rik), mRNA [XM_994760]                                                                | -0.60                | 0.007   | 0.177           |
| chr7:69024136-69131056_F   | chr7:69024136-69131056_F   | lincRNA:chr7:69024136-69131056 forward strand                                                                                                           | -0.60                | 0.040   | 0.415           |
| Grpr                       | NM_008177                  | ref Mus musculus gastrin releasing peptide receptor (Grpr), mRNA [NM_008177]                                                                            | -0.60                | 0.044   | 0.436           |
| ENSMUST00000114306         | ENSMUST00000114306         | ens neuregulin 4 Gene [Source:MGI (curated);Acc:MGI:1933833] [ENSMUST00000114306]                                                                       | -0.60                | 0.036   | 0.394           |
| LOC633056                  | XM_907391                  | ref PREDICTED: Mus musculus similar to TL antigen (LOC633056), mRNA [XM_907391]                                                                         | -0.60                | 0.015   | 0.263           |
| Olf270                     | NM_146607                  | ref Mus musculus olfactory receptor 270 (Olf270), mRNA [NM_146607]                                                                                      | -0.60                | 0.009   | 0.201           |
| Ube2c                      | NM_026785                  | ref Mus musculus ubiquitin-conjugating enzyme E2C (Ube2c), mRNA [NM_026785]                                                                             | -0.61                | 0.004   | 0.133           |
| LOC100048852               | XM_001472342               | ref PREDICTED: Mus musculus similar to phospholipase A2, group V (LOC100048852), mRNA [XM_001472342]                                                    | -0.61                | 0.002   | 0.083           |
| Gp5                        | NM_008148                  | ref Mus musculus glycoprotein 5 (platelet) (Gp5), mRNA [NM_008148]                                                                                      | -0.61                | 0.012   | 0.237           |
| chr17:74595885-74597555_R  | chr17:74595885-74597555_R  | lincRNA:chr17:74595885-74597555 reverse strand                                                                                                          | -0.61                | 0.009   | 0.198           |
| Hbb-b2                     | NM_016956                  | ref Mus musculus hemoglobin, beta adult minor chain (Hbb-b2), mRNA [NM_016956]                                                                          | -0.61                | 0.005   | 0.145           |
| A630073D07Rik              | NM_001142969               | ref Mus musculus RIKEN cDNA A630073D07 gene (A630073D07Rik), mRNA [NM_001142969]                                                                        | -0.61                | 0.029   | 0.355           |

Online Supplemental Table IV: Con-STZ Only

| Gene Symbol                | RefSeq                     | Description                                                                                                                                                    | logFC<br>Con-STZ | P-value | Adj.<br>P-value |
|----------------------------|----------------------------|----------------------------------------------------------------------------------------------------------------------------------------------------------------|------------------|---------|-----------------|
| Mxi1                       | NM_001008542               | ref Mus musculus Max interacting protein 1 (Mxi1), transcript variant 2, mRNA [NM_001008542]                                                                   | -0.61            | 0.026   | 0.341           |
| Cd200                      | NM_010818                  | ref Mus musculus CD200 antigen (Cd200), mRNA [NM_010818]                                                                                                       | -0.61            | 0.043   | 0.428           |
| Vmn2r80                    | NM_001103368               | ref Mus musculus vomeronasal 2, receptor 80 (Vmn2r80), mRNA [NM_001103368]                                                                                     | -0.61            | 0.011   | 0.220           |
| chr14:78214602-78226287_F  | chr14:78214602-78226287_F  | lincRNA:chr14:78214602-78226287 forward strand                                                                                                                 | -0.61            | 0.050   | 0.456           |
| Tdrd5                      | AK138828                   | gb Mus musculus 0 day neonate thymus cDNA, RIKEN full-length enriched library, clone:A430087N04 product:hypothetical protein, full insert sequence. [AK138828] | -0.61            | 0.045   | 0.437           |
| chrX:120963050-120963598_F | chrX:120963050-120963598_F | lincRNA:chrX:120963050-120963598 forward strand                                                                                                                | -0.61            | 0.000   | 0.032           |
| Gm5782                     | XM_622131                  | ref PREDICTED: Mus musculus predicted gene, EG544767 (EG544767), mRNA [XM_622131]                                                                              | -0.62            | 0.035   | 0.390           |
| LOC633720                  | XM_908200                  | ref PREDICTED: Mus musculus hypothetical LOC633720 (LOC633720), mRNA [XM_908200]                                                                               | -0.62            | 0.046   | 0.442           |
| Gm3654                     | XM_001477536               | ref PREDICTED: Mus musculus similar to 2810047C21Rik protein (LOC100042083), mRNA [XM_001477536]                                                               | -0.62            | 0.028   | 0.348           |
| chr12:8451791-8452287_R    | chr12:8451791-8452287_R    | lincRNA:chr12:8451791-8452287 reverse strand                                                                                                                   | -0.62            | 0.030   | 0.360           |
| Lmnb1                      | NM_010721                  | ref Mus musculus lamin B1 (Lmnb1), mRNA [NM_010721]                                                                                                            | -0.62            | 0.008   | 0.193           |
| Cd3g                       | NM_009850                  | ref Mus musculus CD3 antigen, gamma polypeptide (Cd3g), mRNA [NM_009850]                                                                                       | -0.62            | 0.041   | 0.422           |
| Gadd45a                    | NM_007836                  | ref Mus musculus growth arrest and DNA-damage-inducible 45 alpha (Gadd45a), mRNA [NM_007836]                                                                   | -0.62            | 0.005   | 0.150           |
| AU015230                   | BG083149                   | gb H3085A07-5 NIA Mouse 15K cDNA Clone Set Mus musculus cDNA clone H3085A07 5', mRNA sequence [BG083149]                                                       | -0.62            | 0.019   | 0.291           |
| Lpin1                      | NM_001130412               | ref Mus musculus lipin 1 (Lpin1), transcript variant 3, mRNA [NM_001130412]                                                                                    | -0.62            | 0.002   | 0.096           |
| chr13:51248135-51248633_R  | chr13:51248135-51248633_R  | lincRNA:chr13:51248135-51248633 reverse strand                                                                                                                 | -0.62            | 0.047   | 0.448           |
| Myct1                      | NM_026793                  | ref Mus musculus myc target 1 (Myct1), mRNA [NM_026793]                                                                                                        | -0.62            | 0.015   | 0.260           |
| chr6:52046805-52072744_F   | chr6:52046805-52072744_F   | lincRNA:chr6:52046805-52072744 forward strand                                                                                                                  | -0.63            | 0.047   | 0.446           |
| chr13:28490070-28492645_R  | chr13:28490070-28492645_R  | lincRNA:chr13:28490070-28492645 reverse strand                                                                                                                 | -0.63            | 0.017   | 0.280           |
| ENSMUST00000035088         | ENSMUST00000035088         | ens CLIP associating protein 2 Gene [Source:MGI Symbol;Acc:MGI:1923749] [ENSMUST00000035088]                                                                   | -0.63            | 0.010   | 0.210           |
| BC117090                   | NM_001001332               | ref Mus musculus cDNA sequence BC117090 (BC117090), mRNA [NM_001001332]                                                                                        | -0.63            | 0.034   | 0.386           |
| Trim67                     | NM_198632                  | ref Mus musculus tripartite motif-containing 67 (Trim67), mRNA [NM_198632]                                                                                     | -0.63            | 0.003   | 0.116           |
| Tbx22                      | NM_181319                  | ref Mus musculus T-box 22 (Tbx22), transcript variant 2, mRNA [NM_181319]                                                                                      | -0.63            | 0.016   | 0.272           |
| chrX:18810088-18814982_R   | chrX:18810088-18814982_R   | lincRNA:chrX:18810088-18814982 reverse strand                                                                                                                  | -0.63            | 0.021   | 0.303           |
| Cdh23                      | NM_023370                  | ref Mus musculus cadherin 23 (otocadherin) (Cdh23), mRNA [NM_023370]                                                                                           | -0.63            | 0.023   | 0.316           |
| chr13:65338067-65365992_F  | chr13:65338067-65365992_F  | lincRNA:chr13:65338067-65365992 forward strand                                                                                                                 | -0.63            | 0.005   | 0.155           |
| 4921528I01Rik              | NM_027616                  | ref Mus musculus RIKEN cDNA 4921528I01 gene (4921528I01Rik), mRNA [NM_027616]                                                                                  | -0.63            | 0.046   | 0.444           |
| chr6:52046805-52072744_F   | chr6:52046805-52072744_F   | lincRNA:chr6:52046805-52072744 forward strand                                                                                                                  | -0.63            | 0.017   | 0.277           |
| LOC100044631               | XM_001472620               | ref PREDICTED: Mus musculus hypothetical protein LOC100044631 (LOC100044631), mRNA [XM_001472620]                                                              | -0.64            | 0.012   | 0.237           |
| 4921531C22Rik              | NR_033782                  | ref Mus musculus RIKEN cDNA 4921531C22 gene (4921531C22Rik), non-coding RNA [NR_033782]                                                                        | -0.64            | 0.021   | 0.302           |

| Online Supplemental Table IV: Con-STZ Only |                            |                                                                                                                                                             |                  |         |                 |
|--------------------------------------------|----------------------------|-------------------------------------------------------------------------------------------------------------------------------------------------------------|------------------|---------|-----------------|
| Gene Symbol                                | RefSeq                     | Description                                                                                                                                                 | logFC<br>Con-STZ | P-value | Adj.<br>P-value |
| chr8:90048940-90049461_F                   | chr8:90048940-90049461_F   | lincRNA:chr8:90048940-90049461 forward strand                                                                                                               | -0.64            | 0.003   | 0.108           |
| chr16:40312038-40315564_F                  | chr16:40312038-40315564_F  | lincRNA:chr16:40312038-40315564 forward strand                                                                                                              | -0.64            | 0.034   | 0.384           |
| ENSMUST00000023934                         | ENSMUST00000023934         | ens hemoglobin, beta adult minor chain Gene [Source:MGI (curated);Acc:MGI:96022] [ENSMUST00000023934]                                                       | -0.64            | 0.003   | 0.108           |
| Mybl2                                      | NM_008652                  | ref Mus musculus myeloblastosis oncogene-like 2 (Mybl2), mRNA [NM_008652]                                                                                   | -0.64            | 0.041   | 0.418           |
| ENSMUST00000084362                         | ENSMUST00000084362         | ens RIKEN cDNA 9630013D21 gene Gene [Source:MGI Symbol;Acc:MGI:2442649] [ENSMUST00000084362]                                                                | -0.64            | 0.003   | 0.123           |
| D630004K10Rik                              | AK052609                   | gb Mus musculus 0 day neonate kidney cDNA, RIKEN full-length enriched library, clone:D630004K10 product:unclassifiable, full insert sequence. [AK052609]    | -0.64            | 0.005   | 0.143           |
| Klra4                                      | NM_010649                  | ref Mus musculus killer cell lectin-like receptor, subfamily A, member 4 (Klra4), mRNA [NM_010649]                                                          | -0.64            | 0.010   | 0.216           |
| Ctnnd2                                     | NM_008729                  | ref Mus musculus catenin (cadherin associated protein), delta 2 (Ctnnd2), mRNA [NM_008729]                                                                  | -0.65            | 0.033   | 0.377           |
| A930029G22Rik                              | XM_001480148               | ref PREDICTED: Mus musculus RIKEN cDNA A930029G22 gene (A930029G22Rik), mRNA [XM_001480148]                                                                 | -0.65            | 0.010   | 0.213           |
| Nkx6-2                                     | NM_183248                  | ref Mus musculus NK6 homeobox 2 (Nkx6-2), transcript variant 1, mRNA [NM_183248]                                                                            | -0.66            | 0.046   | 0.444           |
| Cc2d2a                                     | NM_172274                  | ref Mus musculus coiled-coil and C2 domain containing 2A (Cc2d2a), mRNA [NM_172274]                                                                         | -0.66            | 0.018   | 0.284           |
| chr2:157838320-157853495_F                 | chr2:157838320-157853495_F | lincRNA:chr2:157838320-157853495 forward strand                                                                                                             | -0.66            | 0.010   | 0.208           |
| ENSMUST00000100889                         | ENSMUST00000100889         | ens Putative uncharacterized protein [Source:UniProtKB/TrEMBL;Acc:Q3UUH2] [ENSMUST00000100889]                                                              | -0.66            | 0.020   | 0.295           |
| Mcam                                       | NM_023061                  | ref Mus musculus melanoma cell adhesion molecule (Mcam), mRNA [NM_023061]                                                                                   | -0.66            | 0.022   | 0.315           |
| chr12:76776232-76776905_F                  | chr12:76776232-76776905_F  | lincRNA:chr12:76776232-76776905 forward strand                                                                                                              | -0.66            | 0.026   | 0.342           |
| chr15:5969454-5994540_F                    | chr15:5969454-5994540_F    | lincRNA:chr15:5969454-5994540 forward strand                                                                                                                | -0.66            | 0.030   | 0.365           |
| Fcrl5                                      | NM_001113238               | ref Mus musculus Fc receptor-like 5 (Fcrl5), transcript variant 2, mRNA [NM_001113238]                                                                      | -0.67            | 0.008   | 0.193           |
| Dpy19l2                                    | NM_001166207               | ref Mus musculus dpy-19-like 2 (C. elegans) (Dpy19l2), mRNA [NM_001166207]                                                                                  | -0.67            | 0.007   | 0.178           |
| Gm8709                                     | NR_033633                  | ref Mus musculus predicted gene 8709 (Gm8709), non-coding RNA [NR_033633]                                                                                   | -0.67            | 0.023   | 0.321           |
| chr5:23349978-23402028_R                   | chr5:23349978-23402028_R   | lincRNA:chr5:23349978-23402028 reverse strand                                                                                                               | -0.67            | 0.045   | 0.439           |
| chr8:90048940-90049461_F                   | chr8:90048940-90049461_F   | lincRNA:chr8:90048940-90049461 forward strand                                                                                                               | -0.67            | 0.008   | 0.185           |
| A930018M24Rik                              | AK034241                   | gb Mus musculus adult male diencephalon cDNA, RIKEN full-length enriched library, clone:9330167E06 product:unclassifiable, full insert sequence. [AK034241] | -0.68            | 0.025   | 0.332           |
| Olfr281                                    | NM_146280                  | ref Mus musculus olfactory receptor 281 (Olfr281), mRNA [NM_146280]                                                                                         | -0.68            | 0.002   | 0.091           |
| Cd79b                                      | NM_008339                  | ref Mus musculus CD79B antigen (Cd79b), mRNA [NM_008339]                                                                                                    | -0.68            | 0.033   | 0.377           |
| ENSMUST00000095981                         | ENSMUST00000095981         | ref PREDICTED: Mus musculus similar to CDNA sequence BC061237 (LOC100040976), mRNA [XM_001475591]                                                           | -0.68            | 0.019   | 0.291           |
| chr10:21710544-21710942_F                  | chr10:21710544-21710942_F  | lincRNA:chr10:21710544-21710942 forward strand                                                                                                              | -0.68            | 0.026   | 0.337           |
| LOC100045932                               | XM_001475199               | ref PREDICTED: Mus musculus similar to Glyceraldehyde-3-phosphate dehydrogenase (GAPDH) (LOC100045932), mRNA [XM_001475199]                                 | -0.68            | 0.042   | 0.422           |
| 5830405N20Rik                              | NM_183264                  | ref Mus musculus RIKEN cDNA 5830405N20 gene (5830405N20Rik), mRNA [NM_183264]                                                                               | -0.68            | 0.007   | 0.178           |

| Online Supplemental Table IV: Con-STZ Only |                            |                                                                                                                                                                                       |                  |         |                 |
|--------------------------------------------|----------------------------|---------------------------------------------------------------------------------------------------------------------------------------------------------------------------------------|------------------|---------|-----------------|
| Gene Symbol                                | RefSeq                     | Description                                                                                                                                                                           | logFC<br>Con-STZ | P-value | Adj.<br>P-value |
| Slc16a10                                   | NM_001114332               | ref Mus musculus solute carrier family 16 (monocarboxylic acid transporters), member 10 (Slc16a10), transcript variant 1, mRNA [NM_001114332]                                         | -0.68            | 0.002   | 0.100           |
| 4930433I11Rik                              | NM_207248                  | ref Mus musculus RIKEN cDNA 4930433I11 gene (4930433I11Rik), mRNA [NM_207248]                                                                                                         | -0.68            | 0.010   | 0.215           |
| Umodl1                                     | NM_177465                  | ref Mus musculus uromodulin-like 1 (Umodl1), mRNA [NM_177465]                                                                                                                         | -0.68            | 0.001   | 0.077           |
| Hist1h2ak                                  | NM_178183                  | ref Mus musculus histone cluster 1, H2ak (Hist1h2ak), mRNA [NM_178183]                                                                                                                | -0.68            | 0.021   | 0.302           |
| LOC100041579                               | XM_001473364               | ref PREDICTED: Mus musculus similar to chemokine (C-C motif) ligand 27, transcript variant 1 (LOC100041579), mRNA [XM_001473364]                                                      | -0.69            | 0.015   | 0.260           |
| ENSMUST00000056086                         | ENSMUST00000056086         | ens RIKEN cDNA 4930442H23 gene Gene [Source:MGI Symbol;Acc:MGI:1922144] [ENSMUST00000056086]                                                                                          | -0.69            | 0.004   | 0.135           |
| 4930428E23Rik                              | NM_001033786               | ref Mus musculus RIKEN cDNA 4930428E23 gene (4930428E23Rik), mRNA [NM_001033786]                                                                                                      | -0.69            | 0.006   | 0.167           |
| Mif1                                       | NM_010801                  | ref Mus musculus myeloid leukemia factor 1 (Mif1), transcript variant 2, mRNA [NM_010801]                                                                                             | -0.69            | 0.030   | 0.361           |
| chr1:82892851-82943201_F                   | chr1:82892851-82943201_F   | lincRNA:chr1:82892851-82943201 forward strand                                                                                                                                         | -0.69            | 0.016   | 0.273           |
| chr5:35975265-35982561_F                   | chr5:35975265-35982561_F   | lincRNA:chr5:35975265-35982561 forward strand                                                                                                                                         | -0.69            | 0.002   | 0.103           |
| ENSMUST00000103743                         | ENSMUST00000103743         | ens Ig lambda-3 chain C region [Source:UniProtKB/Swiss-Prot;Acc:P01845] [ENSMUST00000103743]                                                                                          | -0.69            | 0.044   | 0.434           |
| Hist2h3c2-ps                               | NM_054045                  | ref Mus musculus histone cluster 2, H3c2, pseudogene (Hist2h3c2-ps), mRNA [NM_054045]                                                                                                 | -0.69            | 0.000   | 0.004           |
| Gm8046                                     | XM_001476034               | ref PREDICTED: Mus musculus hypothetical LOC666322 (LOC666322), mRNA [XM_001476034]                                                                                                   | -0.69            | 0.039   | 0.412           |
| E2f2                                       | NM_177733                  | ref Mus musculus E2F transcription factor 2 (E2f2), mRNA [NM_177733]                                                                                                                  | -0.70            | 0.005   | 0.145           |
| Wnt5b                                      | NM_009525                  | ref Mus musculus wingless-related MMTV integration site 5B (Wnt5b), mRNA [NM_009525]                                                                                                  | -0.70            | 0.007   | 0.173           |
| chrX:100745320-100819322_R                 | chrX:100745320-100819322_R | lincRNA:chrX:100745320-100819322 reverse strand                                                                                                                                       | -0.70            | 0.002   | 0.102           |
| chr5:122982442-123000053_F                 | chr5:122982442-123000053_F | lincRNA:chr5:122982442-123000053 forward strand                                                                                                                                       | -0.70            | 0.020   | 0.295           |
| TC1666469                                  | TC1666469                  | tc RNF19_MOUSE (P50636) RING finger protein 19 (XY body protein) (XYbp) (Gametogenesis expressed protein GEG-154) (UBCM4-interacting protein 117) (UIP117), partial (48%) [TC1666469] | -0.70            | 0.007   | 0.178           |
| chr1:166985480-166986024_R                 | chr1:166985480-166986024_R | lincRNA:chr1:166985480-166986024 reverse strand                                                                                                                                       | -0.71            | 0.031   | 0.366           |
| chr14:75770673-75771326_F                  | chr14:75770673-75771326_F  | lincRNA:chr14:75770673-75771326 forward strand                                                                                                                                        | -0.71            | 0.018   | 0.285           |
| Gm4322                                     | XR_034577                  | ref PREDICTED: Mus musculus similar to Bex4 protein (LOC100043261), misc RNA [XR_034577]                                                                                              | -0.71            | 0.004   | 0.135           |
| Slc15a1                                    | NM_053079                  | ref Mus musculus solute carrier family 15 (oligopeptide transporter), member 1 (Slc15a1), mRNA [NM_053079]                                                                            | -0.72            | 0.022   | 0.314           |
| Col22a1                                    | NM_027174                  | ref Mus musculus collagen, type XXII, alpha 1 (Col22a1), mRNA [NM_027174]                                                                                                             | -0.72            | 0.033   | 0.376           |
| chr14:28231577-28242027_R                  | chr14:28231577-28242027_R  | lincRNA:chr14:28231577-28242027 reverse strand                                                                                                                                        | -0.72            | 0.048   | 0.450           |
| Gm4727                                     | XM_001481245               | ref PREDICTED: Mus musculus similar to cyclic nucleotide gated channel beta 1 (LOC100043936), mRNA [XM_001481245]                                                                     | -0.72            | 0.041   | 0.419           |
| chr5:35975265-35982561_F                   | chr5:35975265-35982561_F   | lincRNA:chr5:35975265-35982561 forward strand                                                                                                                                         | -0.72            | 0.001   | 0.065           |
| LOC636713                                  | XM_912206                  | ref PREDICTED: Mus musculus similar to SRF-dependent transcription regulation associated protein (LOC636713), mRNA [XM_912206]                                                        | -0.72            | 0.042   | 0.425           |
| ENSMUST00000103558                         | ENSMUST00000103558         | ens T-cell receptor gamma chain C region C7.5 [Source:UniProtKB/Swiss-Prot;Acc:P03985] [ENSMUST00000103558]                                                                           | -0.72            | 0.048   | 0.450           |



Online Supplemental Table IV: Con-STZ Only

| Gene Symbol                | RefSeq                     | Description                                                                                                                                                         | logFC<br>Con-STZ | P-value | Adj.<br>P-value |
|----------------------------|----------------------------|---------------------------------------------------------------------------------------------------------------------------------------------------------------------|------------------|---------|-----------------|
| 2310002F09Rik              | AK086402                   | gb Mus musculus 15 days embryo head cDNA, RIKEN full-length enriched library, clone:D930025P12 product:RIKEN cDNA 2310002F09 gene, full insert sequence. [AK086402] | -0.73            | 0.017   | 0.279           |
| LOC100044327               | XM_001471985               | ref PREDICTED: Mus musculus hypothetical protein LOC100044327 (LOC100044327), mRNA [XM_001471985]                                                                   | -0.73            | 0.013   | 0.247           |
| ENSMUST00000097363         | ENSMUST00000097363         | ens Putative uncharacterized protein [Source:UniProtKB/TrEMBL;Acc:Q3UUN7] [ENSMUST00000097363]                                                                      | -0.73            | 0.036   | 0.394           |
| Olf1153                    | NM_146640                  | ref Mus musculus olfactory receptor 1153 (Olf1153), mRNA [NM_146640]                                                                                                | -0.73            | 0.013   | 0.246           |
| Gm9441                     | XM_001473953               | ref PREDICTED: Mus musculus hypothetical LOC669079 (LOC669079), mRNA [XM_001473953]                                                                                 | -0.73            | 0.031   | 0.370           |
| Fbxo15                     | NM_015798                  | ref Mus musculus F-box protein 15 (Fbxo15), mRNA [NM_015798]                                                                                                        | -0.74            | 0.017   | 0.276           |
| chr9:31834945-32015745_F   | chr9:31834945-32015745_F   | lincRNA:chr9:31834945-32015745 forward strand                                                                                                                       | -0.74            | 0.028   | 0.349           |
| Pkd2l2                     | NM_016927                  | ref Mus musculus polycystic kidney disease 2-like 2 (Pkd2l2), transcript variant 1, mRNA [NM_016927]                                                                | -0.74            | 0.025   | 0.332           |
| chr6:52046805-52072744_F   | chr6:52046805-52072744_F   | lincRNA:chr6:52046805-52072744 forward strand                                                                                                                       | -0.74            | 0.000   | 0.042           |
| Olf1461                    | NM_146302                  | ref Mus musculus olfactory receptor 1461 (Olf1461), mRNA [NM_146302]                                                                                                | -0.74            | 0.018   | 0.282           |
| ENSMUST00000110843         | ENSMUST00000110843         | ens dispatched homolog 2 (Drosophila) Gene [Source:MGI (curated);Acc:MGI:2388733] [ENSMUST00000110843]                                                              | -0.75            | 0.031   | 0.368           |
| 1700011F03Rik              | NM_028825                  | ref Mus musculus RIKEN cDNA 1700011F03 gene (1700011F03Rik), mRNA [NM_028825]                                                                                       | -0.75            | 0.016   | 0.274           |
| ENSMUST00000115043         | ENSMUST00000115043         | ens Fas-activated serine/threonine kinase Gene [Source:MGI (curated);Acc:MGI:1913837] [ENSMUST00000115043]                                                          | -0.75            | 0.005   | 0.145           |
| chrX:20376867-20377837_F   | chrX:20376867-20377837_F   | lincRNA:chrX:20376867-20377837 forward strand                                                                                                                       | -0.75            | 0.039   | 0.412           |
| Olf433                     | NM_146717                  | ref Mus musculus olfactory receptor 433 (Olf433), mRNA [NM_146717]                                                                                                  | -0.75            | 0.031   | 0.368           |
| chr19:38392796-38398771_R  | chr19:38392796-38398771_R  | lincRNA:chr19:38392796-38398771 reverse strand                                                                                                                      | -0.76            | 0.007   | 0.171           |
| chr17:38132217-38157667_F  | chr17:38132217-38157667_F  | lincRNA:chr17:38132217-38157667 forward strand                                                                                                                      | -0.76            | 0.049   | 0.456           |
| chr5:35975265-35982561_F   | chr5:35975265-35982561_F   | lincRNA:chr5:35975265-35982561 forward strand                                                                                                                       | -0.76            | 0.001   | 0.049           |
| chr5:35975265-35982561_F   | chr5:35975265-35982561_F   | lincRNA:chr5:35975265-35982561 forward strand                                                                                                                       | -0.77            | 0.002   | 0.095           |
| Gm2750                     | XM_001474616               | ref PREDICTED: Mus musculus similar to Ubt1 protein (LOC100040397), mRNA [XM_001474616]                                                                             | -0.77            | 0.028   | 0.351           |
| 2210407C18Rik              | NM_144544                  | ref Mus musculus RIKEN cDNA 2210407C18 gene (2210407C18Rik), mRNA [NM_144544]                                                                                       | -0.77            | 0.001   | 0.068           |
| Fbxw18                     | NM_001033794               | ref Mus musculus F-box and WD-40 domain protein 18 (Fbxw18), mRNA [NM_001033794]                                                                                    | -0.78            | 0.001   | 0.080           |
| chr2:75492010-75492464_F   | chr2:75492010-75492464_F   | lincRNA:chr2:75492010-75492464 forward strand                                                                                                                       | -0.78            | 0.032   | 0.373           |
| Osbpl6                     | NM_145525                  | ref Mus musculus oxysterol binding protein-like 6 (Osbpl6), mRNA [NM_145525]                                                                                        | -0.78            | 0.002   | 0.083           |
| Brca1                      | NM_009764                  | ref Mus musculus breast cancer 1 (Brca1), mRNA [NM_009764]                                                                                                          | -0.78            | 0.024   | 0.326           |
| Nacad                      | NM_001081652               | ref Mus musculus NAC alpha domain containing (Nacad), mRNA [NM_001081652]                                                                                           | -0.79            | 0.004   | 0.140           |
| chr5:113594167-113645342_R | chr5:113594167-113645342_R | lincRNA:chr5:113594167-113645342 reverse strand                                                                                                                     | -0.79            | 0.008   | 0.190           |
| chr1:42689799-42749799_F   | chr1:42689799-42749799_F   | lincRNA:chr1:42689799-42749799 forward strand                                                                                                                       | -0.80            | 0.006   | 0.157           |

Online Supplemental Table IV: Con-STZ Only

| Gene Symbol                 | RefSeq                      | Description                                                                                                                                                                          | logFC<br>Con-<br>STZ | P-value | Adj.<br>P-value |
|-----------------------------|-----------------------------|--------------------------------------------------------------------------------------------------------------------------------------------------------------------------------------|----------------------|---------|-----------------|
| 2010015L04Rik               | NM_177674                   | ref Mus musculus RIKEN cDNA 2010015L04 gene (2010015L04Rik), transcript variant 1, mRNA [NM_177674]                                                                                  | -0.80                | 0.012   | 0.228           |
| chr1:73664661-73911040_R    | chr1:73664661-73911040_R    | lincRNA:chr1:73664661-73911040 reverse strand                                                                                                                                        | -0.80                | 0.050   | 0.457           |
| chr18:84297418-84297745_R   | chr18:84297418-84297745_R   | lincRNA:chr18:84297418-84297745 reverse strand                                                                                                                                       | -0.81                | 0.007   | 0.180           |
| Pate4                       | NM_020264                   | ref Mus musculus prostate and testis expressed 4 (Pate4), mRNA [NM_020264]                                                                                                           | -0.81                | 0.020   | 0.300           |
| Hapln1                      | NM_013500                   | ref Mus musculus hyaluronan and proteoglycan link protein 1 (Hapln1), mRNA [NM_013500]                                                                                               | -0.81                | 0.028   | 0.349           |
| Gm6258                      | XM_896627                   | ref PREDICTED: Mus musculus predicted gene, EG621771 (EG621771), mRNA [XM_896627]                                                                                                    | -0.81                | 0.037   | 0.401           |
| Ltb                         | NM_008518                   | ref Mus musculus lymphotoxin B (Ltb), mRNA [NM_008518]                                                                                                                               | -0.82                | 0.036   | 0.391           |
| chr15:5969454-5994540_R     | chr15:5969454-5994540_R     | lincRNA:chr15:5969454-5994540 reverse strand                                                                                                                                         | -0.83                | 0.013   | 0.239           |
| Rab42-ps                    | NM_001081651                | ref Mus musculus RAB42, member RAS oncogene family, pseudogene (Rab42-ps), mRNA [NM_001081651]                                                                                       | -0.83                | 0.010   | 0.215           |
| A530088E08Rik               | NR_029458                   | ref Mus musculus RIKEN cDNA A530088E08 gene (A530088E08Rik), non-coding RNA [NR_029458]                                                                                              | -0.84                | 0.025   | 0.331           |
| chr2:104702675-104736600_R  | chr2:104702675-104736600_R  | lincRNA:chr2:104702675-104736600 reverse strand                                                                                                                                      | -0.84                | 0.046   | 0.445           |
| Lrrc4                       | NM_138682                   | ref Mus musculus leucine rich repeat containing 4 (Lrrc4), mRNA [NM_138682]                                                                                                          | -0.84                | 0.000   | 0.038           |
| A330009N23Rik               | AK038079                    | gb Mus musculus 16 days neonate thymus cDNA, RIKEN full-length enriched library, clone:A130076P06 product:unclassifiable, full insert sequence. [AK038079]                           | -0.85                | 0.045   | 0.441           |
| Ptchd2                      | NM_001083342                | ref Mus musculus patched domain containing 2 (Ptchd2), mRNA [NM_001083342]                                                                                                           | -0.85                | 0.016   | 0.267           |
| chr5:137392195-137426421_R  | chr5:137392195-137426421_R  | lincRNA:chr5:137392195-137426421 reverse strand                                                                                                                                      | -0.86                | 0.032   | 0.374           |
| C030047K22Rik               | AK021157                    | gb Mus musculus adult male corpus striatum cDNA, RIKEN full-length enriched library, clone:C030047K22 product:inferred: RIKEN cDNA C030047K22 gene, full insert sequence. [AK021157] | -0.86                | 0.039   | 0.408           |
| LOC676603                   | XR_035487                   | ref PREDICTED: Mus musculus similar to Xlr-like (LOC676603), misc RNA [XR_035487]                                                                                                    | -0.87                | 0.011   | 0.222           |
| chr5:115806200-115834425_R  | chr5:115806200-115834425_R  | lincRNA:chr5:115806200-115834425 reverse strand                                                                                                                                      | -0.87                | 0.041   | 0.421           |
| Vmn1r168                    | NM_001166842                | ref Mus musculus vomeronasal 1 receptor 168 (Vmn1r168), mRNA [NM_001166842]                                                                                                          | -0.87                | 0.019   | 0.293           |
| chr11:104304424-104329824_F | chr11:104304424-104329824_F | lincRNA:chr11:104304424-104329824 forward strand                                                                                                                                     | -0.88                | 0.029   | 0.357           |
| Gm9513                      | NM_001128510                | ref Mus musculus predicted gene 9513 (Gm9513), mRNA [NM_001128510]                                                                                                                   | -0.89                | 0.041   | 0.421           |
| 4930440C22Rik               | AK015347                    | gb Mus musculus adult male testis cDNA, RIKEN full-length enriched library, clone:4930440C22 product:unclassifiable, full insert sequence. [AK015347]                                | -0.89                | 0.047   | 0.447           |
| chr11:6748267-6818192_R     | chr11:6748267-6818192_R     | lincRNA:chr11:6748267-6818192 reverse strand                                                                                                                                         | -0.90                | 0.023   | 0.317           |
| Cd300lf                     | NM_001169153                | ref Mus musculus CD300 antigen like family member F (Cd300lf), transcript variant 1, mRNA [NM_001169153]                                                                             | -0.91                | 0.025   | 0.332           |
| Krt12                       | NM_010661                   | ref Mus musculus keratin 12 (Krt12), mRNA [NM_010661]                                                                                                                                | -0.92                | 0.042   | 0.426           |
| Il15                        | NM_008357                   | ref Mus musculus interleukin 15 (Il15), mRNA [NM_008357]                                                                                                                             | -0.93                | 0.000   | 0.006           |
| chr17:66802920-66834745_F   | chr17:66802920-66834745_F   | lincRNA:chr17:66802920-66834745 forward strand                                                                                                                                       | -0.97                | 0.032   | 0.373           |
| 4932414N04Rik               | NM_183113                   | ref Mus musculus RIKEN cDNA 4932414N04 gene (4932414N04Rik), mRNA [NM_183113]                                                                                                        | -0.97                | 0.031   | 0.367           |

Online Supplemental Table IV: Con-STZ Only

| Gene Symbol                      | RefSeq                    | Description                                                                                                                                                                | logFC<br>Con-STZ | P-value | Adj.<br>P-value |
|----------------------------------|---------------------------|----------------------------------------------------------------------------------------------------------------------------------------------------------------------------|------------------|---------|-----------------|
| <b>Rbms3</b>                     | NM_001172123              | ref Mus musculus RNA binding motif, single stranded interacting protein (Rbms3), transcript variant 1, mRNA [NM_001172123]                                                 | -1.02            | 0.004   | 0.126           |
| <b>Gm5114</b>                    | NM_177890                 | ref Mus musculus predicted gene 5114 (Gm5114), mRNA [NM_177890]                                                                                                            | -1.04            | 0.017   | 0.274           |
| <b>chr11:96112907-96125798_F</b> | chr11:96112907-96125798_F | lincRNA:chr11:96112907-96125798 forward strand                                                                                                                             | -1.05            | 0.010   | 0.208           |
| <b>Mycn</b>                      | NM_008709                 | ref Mus musculus v-myc myelocytomatosis viral related oncogene, neuroblastoma derived (avian) (Mycn), mRNA [NM_008709]                                                     | -1.06            | 0.017   | 0.276           |
| <b>Speer4e</b>                   | NM_001122661              | ref Mus musculus spermatogenesis associated glutamate (E)-rich protein 4e (Speer4e), mRNA [NM_001122661]                                                                   | -1.08            | 0.044   | 0.432           |
| <b>Ccne1</b>                     | NM_007633                 | ref Mus musculus cyclin E1 (Ccne1), mRNA [NM_007633]                                                                                                                       | -1.13            | 0.002   | 0.088           |
| <b>4930579P08Rik</b>             | AK016333                  | gb Mus musculus adult male testis cDNA, RIKEN full-length enriched library, clone:4930579P08 product:unclassifiable, full insert sequence. [AK016333]                      | -1.14            | 0.001   | 0.061           |
| <b>5330427O13Rik</b>             | AK036170                  | gb Mus musculus 16 days neonate cerebellum cDNA, RIKEN full-length enriched library, clone:9630043I15 product:hypothetical protein, full insert sequence. [AK036170]       | -1.15            | 0.014   | 0.255           |
| <b>LOC630474</b>                 | XM_903912                 | ref PREDICTED: Mus musculus hypothetical LOC630474 (LOC630474), mRNA [XM_903912]                                                                                           | -1.27            | 0.020   | 0.295           |
| <b>ENSMUST00000103369</b>        | ENSMUST00000103369        | ens Ig kappa chain V-V region K2 Precursor; Fragment [Source:UniProtKB/Swiss-Prot;Acc:P01635] [ENSMUST00000103369]                                                         | -1.37            | 0.020   | 0.295           |
| <b>9630001P10Rik</b>             | XM_981317                 | ref PREDICTED: Mus musculus RIKEN cDNA 9630001P10 gene (9630001P10Rik), mRNA [XM_981317]                                                                                   | -1.39            | 0.005   | 0.154           |
| <b>Dab1</b>                      | NM_010014                 | ref Mus musculus disabled homolog 1 (Drosophila) (Dab1), transcript variant 1, mRNA [NM_010014]                                                                            | -1.45            | 0.036   | 0.392           |
| <b>G930009F23Rik</b>             | AK145170                  | gb Mus musculus mammary gland RCB-0527 Jyg-MC(B) cDNA, RIKEN full-length enriched library, clone:G930009F23 product:hypothetical protein, full insert sequence. [AK145170] | -1.48            | 0.048   | 0.451           |
| <b>Gm6605</b>                    | XM_893307                 | ref PREDICTED: Mus musculus predicted gene, EG625594, transcript variant 1 (EG625594), mRNA [XM_893307]                                                                    | -1.48            | 0.026   | 0.340           |
| <b>chr5:22058025-22072475_R</b>  | chr5:22058025-22072475_R  | lincRNA:chr5:22058025-22072475 reverse strand                                                                                                                              | -1.65            | 0.042   | 0.426           |
| <b>Gm6084</b>                    | NM_001038500              | ref Mus musculus predicted gene 6084 (Gm6084), mRNA [NM_001038500]                                                                                                         | -1.92            | 0.006   | 0.162           |

| Online Supplemental Table IV: mG4H-Veh and mG4H-STZ Both |                          |                                                                                                                                                                |                       |         |                 |                       |         |                 |
|----------------------------------------------------------|--------------------------|----------------------------------------------------------------------------------------------------------------------------------------------------------------|-----------------------|---------|-----------------|-----------------------|---------|-----------------|
| Gene Symbol                                              | RefSeq                   | Description                                                                                                                                                    | logFC<br>mG4H-<br>STZ | P-value | Adj.<br>P-value | logFC<br>mG4H-<br>Veh | P-value | Adj.<br>P-value |
| <b>Ttc25</b>                                             | NM_028918                | ref Mus musculus tetratricopeptide repeat domain 25 (Ttc25), mRNA [NM_028918]                                                                                  | 1.27                  | 0.000   | 0.026           | 1.55                  | 0.000   | 0.008           |
| <b>chr6:50339188-50409363_F</b>                          | chr6:50339188-50409363_F | lincRNA:chr6:50339188-50409363 forward strand                                                                                                                  | 1.11                  | 0.000   | 0.034           | 1.03                  | 0.000   | 0.012           |
| <b>Krt35</b>                                             | NM_016880                | ref Mus musculus keratin 35 (Krt35), mRNA [NM_016880]                                                                                                          | 0.74                  | 0.000   | 0.136           | 0.34                  | 0.035   | 1.000           |
| <b>Olfr1273-ps</b>                                       | NM_146975                | ref Mus musculus olfactory receptor 1273, pseudogene (Olfr1273-ps), mRNA [NM_146975]                                                                           | 0.54                  | 0.000   | 0.160           | 0.47                  | 0.004   | 0.538           |
| <b>Gm5182</b>                                            | XR_033425                | ref PREDICTED: Mus musculus similar to acetyl-Coenzyme A carboxylase (LOC382567), misc RNA [XR_033425]                                                         | 0.61                  | 0.000   | 0.160           | 1.06                  | 0.000   | 0.002           |
| <b>Rorc</b>                                              | NM_011281                | ref Mus musculus RAR-related orphan receptor gamma (Rorc), mRNA [NM_011281]                                                                                    | 0.62                  | 0.001   | 0.163           | 0.62                  | 0.000   | 0.031           |
| <b>B930042K01Rik</b>                                     | AK047256                 | gb Mus musculus 10 days neonate cerebellum cDNA, RIKEN full-length enriched library, clone:B930042K01 product:unclassifiable, full insert sequence. [AK047256] | 0.51                  | 0.001   | 0.171           | 0.36                  | 0.005   | 0.606           |
| <b>ENSMUST00000103482</b>                                | ENSMUST00000103482       | ens predicted gene 7175 Gene [Source:MGI Symbol;Acc:MGI:3646379] [ENSMUST00000103482]                                                                          | 0.64                  | 0.001   | 0.183           | 0.48                  | 0.029   | 0.986           |
| <b>H2-T3-like</b>                                        | XM_622848                | ref PREDICTED: Mus musculus MHC class I antigen, transcript variant 1 (H2-T3-like), mRNA [XM_622848]                                                           | 0.59                  | 0.001   | 0.183           | 0.41                  | 0.001   | 0.231           |
| <b>A630055G03Rik</b>                                     | NM_001162932             | ref Mus musculus RIKEN cDNA A630055G03 gene (A630055G03Rik), mRNA [NM_001162932]                                                                               | 0.60                  | 0.001   | 0.208           | 0.46                  | 0.031   | 1.000           |
| <b>Acaca</b>                                             | NM_133360                | ref Mus musculus acetyl-Coenzyme A carboxylase alpha (Acaca), mRNA [NM_133360]                                                                                 | 0.56                  | 0.001   | 0.210           | 0.99                  | 0.000   | 0.002           |
| <b>4933436C20Rik</b>                                     | NR_033641                | ref Mus musculus RIKEN cDNA 4933436C20 gene (4933436C20Rik), non-coding RNA [NR_033641]                                                                        | 0.63                  | 0.001   | 0.248           | 0.34                  | 0.004   | 0.550           |
| <b>chr2:25182970-25188091_F</b>                          | chr2:25182970-25188091_F | lincRNA:chr2:25182970-25188091 forward strand                                                                                                                  | 1.00                  | 0.001   | 0.248           | 0.78                  | 0.007   | 0.672           |
| <b>Vmn1r69</b>                                           | NM_145842                | ref Mus musculus vomeronasal 1 receptor 69 (Vmn1r69), mRNA [NM_145842]                                                                                         | 1.04                  | 0.002   | 0.248           | 0.62                  | 0.037   | 1.000           |
| <b>Gm5091</b>                                            | XM_001474131             | ref PREDICTED: Mus musculus hypothetical protein C330048F19 (C330048F19), mRNA [XM_001474131]                                                                  | 0.74                  | 0.002   | 0.256           | 1.09                  | 0.000   | 0.039           |

| Online Supplemental Table IV: mG4H-Veh and mG4H-STZ Both |                           |                                                                                                                                   |                       |         |                 |                       |         |                 |
|----------------------------------------------------------|---------------------------|-----------------------------------------------------------------------------------------------------------------------------------|-----------------------|---------|-----------------|-----------------------|---------|-----------------|
| Gene Symbol                                              | RefSeq                    | Description                                                                                                                       | logFC<br>mG4H-<br>STZ | P-value | Adj.<br>P-value | logFC<br>mG4H-<br>Veh | P-value | Adj.<br>P-value |
| <b>Col13a1</b>                                           | NM_007731                 | ref Mus musculus collagen, type XIII, alpha 1 (Col13a1), mRNA [NM_007731]                                                         | 0.74                  | 0.002   | 0.259           | 0.50                  | 0.021   | 0.904           |
| <b>Kbtbd10</b>                                           | NM_001081087              | ref Mus musculus kelch repeat and BTB (POZ) domain containing 10 (Kbtbd10), mRNA [NM_001081087]                                   | 0.47                  | 0.002   | 0.262           | 0.22                  | 0.011   | 0.770           |
| <b>ENSMUST00000111824</b>                                | ENSMUST00000111824        | ens CWC22 spliceosome-associated protein homolog (S. cerevisiae) Gene [Source:MGI (curated);Acc:MGI:2136773] [ENSMUST00000111824] | 0.42                  | 0.002   | 0.266           | 0.23                  | 0.045   | 1.000           |
| <b>C80998</b>                                            | BG066927                  | gb H3048F03-3 NIA Mouse 15K cDNA Clone Set Mus musculus cDNA clone H3048F03 3', mRNA sequence [BG066927]                          | 0.57                  | 0.002   | 0.269           | 0.41                  | 0.005   | 0.621           |
| <b>Acaca</b>                                             | NM_133360                 | ref Mus musculus acetyl-Coenzyme A carboxylase alpha (Acaca), mRNA [NM_133360]                                                    | 0.67                  | 0.002   | 0.279           | 0.63                  | 0.001   | 0.293           |
| <b>chr8:91471819-91551119_F</b>                          | chr8:91471819-91551119_F  | lincRNA:chr8:91471819-91551119 forward strand                                                                                     | 0.95                  | 0.002   | 0.281           | 0.82                  | 0.008   | 0.694           |
| <b>Defb50</b>                                            | NM_199067                 | ref Mus musculus defensin beta 50 (Defb50), mRNA [NM_199067]                                                                      | 0.88                  | 0.002   | 0.281           | 0.76                  | 0.012   | 0.786           |
| <b>Olfr653</b>                                           | NM_147074                 | ref Mus musculus olfactory receptor 653 (Olfr653), mRNA [NM_147074]                                                               | 0.48                  | 0.002   | 0.281           | 0.41                  | 0.004   | 0.538           |
| <b>Ces6</b>                                              | NM_133960                 | ref Mus musculus carboxylesterase 6 (Ces6), transcript variant 1, mRNA [NM_133960]                                                | 0.68                  | 0.003   | 0.281           | 0.33                  | 0.049   | 1.000           |
| <b>ENSMUST00000103534</b>                                | ENSMUST00000103534        | gb Mus musculus clone J558.15 immunoglobulin heavy chain variable region mRNA, partial cds. [AF303846]                            | 0.81                  | 0.003   | 0.290           | 0.56                  | 0.045   | 1.000           |
| <b>Cdk5rap2</b>                                          | ENSMUST00000144099        | ens CDK5 regulatory subunit associated protein 2 Gene [Source:MGI (curated);Acc:MGI:2384875] [ENSMUST00000144099]                 | 0.93                  | 0.004   | 0.308           | 0.67                  | 0.024   | 0.957           |
| <b>Pou3f2</b>                                            | NM_008899                 | ref Mus musculus POU domain, class 3, transcription factor 2 (Pou3f2), mRNA [NM_008899]                                           | 0.46                  | 0.004   | 0.315           | 0.35                  | 0.034   | 1.000           |
| <b>Slc25a36</b>                                          | NM_138756                 | ref Mus musculus solute carrier family 25, member 36 (Slc25a36), mRNA [NM_138756]                                                 | 0.46                  | 0.004   | 0.316           | 0.44                  | 0.000   | 0.144           |
| <b>chr17:15357376-15385701_R</b>                         | chr17:15357376-15385701_R | lincRNA:chr17:15357376-15385701 reverse strand                                                                                    | 0.65                  | 0.004   | 0.323           | 0.48                  | 0.046   | 1.000           |

Online Supplemental Table IV: mG4H-Veh and mG4H-STZ Both

| Gene Symbol                      | RefSeq                    | Description                                                                                                                                                      | logFC<br>mG4H-<br>STZ | P-value | Adj.<br>P-value | logFC<br>mG4H-<br>Veh | P-value | Adj.<br>P-value |
|----------------------------------|---------------------------|------------------------------------------------------------------------------------------------------------------------------------------------------------------|-----------------------|---------|-----------------|-----------------------|---------|-----------------|
| <b>Chst5</b>                     | NM_019950                 | ref Mus musculus carbohydrate (N-acetylglucosamine 6-O) sulfotransferase 5 (Chst5), mRNA [NM_019950]                                                             | 0.62                  | 0.004   | 0.323           | 0.58                  | 0.008   | 0.696           |
| <b>Gnrhr</b>                     | NM_010323                 | ref Mus musculus gonadotropin releasing hormone receptor (Gnrhr), mRNA [NM_010323]                                                                               | 1.24                  | 0.004   | 0.324           | 0.90                  | 0.014   | 0.821           |
| <b>9130015G15Rik</b>             | XM_001477673              | ref PREDICTED: Mus musculus RIKEN cDNA 9130015G15 gene (9130015G15Rik), mRNA [XM_001477673]                                                                      | 0.62                  | 0.004   | 0.325           | 0.53                  | 0.011   | 0.781           |
| <b>Baiap3</b>                    | NM_001163270              | ref Mus musculus BAI1-associated protein 3 (Baiap3), mRNA [NM_001163270]                                                                                         | 0.66                  | 0.005   | 0.349           | 0.48                  | 0.016   | 0.848           |
| <b>Slc17a7</b>                   | NM_182993                 | ref Mus musculus solute carrier family 17 (sodium-dependent inorganic phosphate cotransporter), member 7 (Slc17a7), mRNA [NM_182993]                             | 0.36                  | 0.005   | 0.349           | 0.27                  | 0.010   | 0.762           |
| <b>ENSMUST00000097350</b>        | ENSMUST00000097350        | ens a disintegrin-like and metallopeptidase (reprolysin type) with thrombospondin type 1 motif, 10 Gene [Source:MGI Symbol;Acc:MGI:2449112] [ENSMUST00000097350] | 0.51                  | 0.005   | 0.349           | 0.44                  | 0.044   | 1.000           |
| <b>chr9:88333945-88342370_F</b>  | chr9:88333945-88342370_F  | lincRNA:chr9:88333945-88342370 forward strand                                                                                                                    | 0.70                  | 0.005   | 0.353           | 0.62                  | 0.037   | 1.000           |
| <b>LOC100045247</b>              | XM_001473923              | ref PREDICTED: Mus musculus hypothetical protein LOC100045247 (LOC100045247), mRNA [XM_001473923]                                                                | 0.79                  | 0.006   | 0.366           | 0.61                  | 0.050   | 1.000           |
| <b>LOC677565</b>                 | XR_034928                 | ref PREDICTED: Mus musculus similar to neural visinin-like Ca2+-binding protein type 3 (LOC677565), misc RNA [XR_034928]                                         | 0.52                  | 0.006   | 0.366           | 0.34                  | 0.049   | 1.000           |
| <b>2010300C02Rik</b>             | NM_028096                 | ref Mus musculus RIKEN cDNA 2010300C02 gene (2010300C02Rik), mRNA [NM_028096]                                                                                    | 0.65                  | 0.006   | 0.366           | 0.69                  | 0.000   | 0.041           |
| <b>chr8:19959345-20020379_R</b>  | chr8:19959345-20020379_R  | lincRNA:chr8:19959345-20020379 reverse strand                                                                                                                    | 0.54                  | 0.006   | 0.366           | 0.57                  | 0.013   | 0.808           |
| <b>A430054B03</b>                | AK040058                  | gb Mus musculus 0 day neonate thymus cDNA, RIKEN full-length enriched library, clone:A430054B03 product:unclassifiable, full insert sequence. [AK040058]         | 0.66                  | 0.006   | 0.366           | 0.47                  | 0.036   | 1.000           |
| <b>chr12:76759861-76760240_R</b> | chr12:76759861-76760240_R | lincRNA:chr12:76759861-76760240 reverse strand                                                                                                                   | 0.56                  | 0.006   | 0.366           | 0.39                  | 0.044   | 1.000           |



| Online Supplemental Table IV: mG4H-Veh and mG4H-STZ Both |                            |                                                                                                                                     |                       |         |                 |                       |         |                 |
|----------------------------------------------------------|----------------------------|-------------------------------------------------------------------------------------------------------------------------------------|-----------------------|---------|-----------------|-----------------------|---------|-----------------|
| Gene Symbol                                              | RefSeq                     | Description                                                                                                                         | logFC<br>mG4H-<br>STZ | P-value | Adj.<br>P-value | logFC<br>mG4H-<br>Veh | P-value | Adj.<br>P-value |
| chr14:14688472-14747272_R                                | chr14:14688472-14747272_R  | lincRNA:chr14:14688472-14747272 reverse strand                                                                                      | 0.87                  | 0.006   | 0.369           | 0.72                  | 0.023   | 0.935           |
| Gm5116                                                   | ENSMUST00000094572         | ref  PREDICTED: Mus musculus predicted gene, EG330689 (EG330689), mRNA [XM_286083]                                                  | 0.46                  | 0.006   | 0.369           | 0.42                  | 0.009   | 0.731           |
| Sema3a                                                   | NM_009152                  | ref  Mus musculus sema domain, immunoglobulin domain (Ig), short basic domain, secreted, (semaphorin) 3A (Sema3a), mRNA [NM_009152] | 0.37                  | 0.007   | 0.370           | 0.29                  | 0.028   | 0.983           |
| Agxt2                                                    | NM_001031851               | ref  Mus musculus alanine-glyoxylate aminotransferase 2 (Agxt2), nuclear gene encoding mitochondrial protein, mRNA [NM_001031851]   | 0.43                  | 0.007   | 0.377           | 0.36                  | 0.009   | 0.719           |
| Gm5565                                                   | XM_485697                  | ref  PREDICTED: Mus musculus hypothetical LOC433961 (LOC433961), mRNA [XM_485697]                                                   | 0.52                  | 0.007   | 0.377           | 0.33                  | 0.033   | 1.000           |
| chr8:128933150-128943375_F                               | chr8:128933150-128943375_F | lincRNA:chr8:128933150-128943375 forward strand                                                                                     | 0.38                  | 0.008   | 0.387           | 0.27                  | 0.049   | 1.000           |
| chr17:15357376-15385701_F                                | chr17:15357376-15385701_F  | lincRNA:chr17:15357376-15385701 forward strand                                                                                      | 0.65                  | 0.008   | 0.391           | 0.46                  | 0.046   | 1.000           |
| chr9:67414463-67483185_F                                 | chr9:67414463-67483185_F   | lincRNA:chr9:67414463-67483185 forward strand                                                                                       | 0.47                  | 0.008   | 0.391           | 0.30                  | 0.018   | 0.871           |
| ENSMUST00000056756                                       | ENSMUST00000056756         | ens  GATS protein-like 2 Gene [Source:MGI (curated);Acc:MGI:1933384] [ENSMUST00000016088]                                           | 0.71                  | 0.008   | 0.391           | 0.28                  | 0.003   | 0.481           |
| Nhlrc4                                                   | NM_001039038               | ref  Mus musculus NHL repeat containing 4 (Nhlrc4), mRNA [NM_001039038]                                                             | 0.52                  | 0.009   | 0.395           | 0.38                  | 0.030   | 0.998           |
| Phkg1                                                    | NM_011079                  | ref  Mus musculus phosphorylase kinase gamma 1 (Phkg1), mRNA [NM_011079]                                                            | 0.35                  | 0.009   | 0.397           | 0.30                  | 0.035   | 1.000           |
| chr7:88668435-88674440_F                                 | chr7:88668435-88674440_F   | lincRNA:chr7:88668435-88674440 forward strand                                                                                       | 0.45                  | 0.009   | 0.398           | 0.39                  | 0.009   | 0.743           |
| 1810013D15Rik                                            | CD766363                   | gb  AGENCOURT_14718497 NIH_MGC_190 Mus musculus cDNA clone IMAGE:30501211 5', mRNA sequence [CD766363]                              | 0.49                  | 0.009   | 0.398           | 0.41                  | 0.013   | 0.810           |
| Pdlim7                                                   | NM_026131                  | ref  Mus musculus PDZ and LIM domain 7 (Pdlim7), transcript variant c, mRNA [NM_026131]                                             | 0.38                  | 0.009   | 0.398           | 0.60                  | 0.000   | 0.050           |

| Online Supplemental Table IV: mG4H-Veh and mG4H-STZ Both |                            |                                                                                                                                                               |                       |         |                 |                       |         |                 |
|----------------------------------------------------------|----------------------------|---------------------------------------------------------------------------------------------------------------------------------------------------------------|-----------------------|---------|-----------------|-----------------------|---------|-----------------|
| Gene Symbol                                              | RefSeq                     | Description                                                                                                                                                   | logFC<br>mG4H-<br>STZ | P-value | Adj.<br>P-value | logFC<br>mG4H-<br>Veh | P-value | Adj.<br>P-value |
| chr8:111766396-111772271_F                               | chr8:111766396-111772271_F | lincRNA:chr8:111766396-111772271 forward strand                                                                                                               | 0.59                  | 0.009   | 0.399           | 0.61                  | 0.004   | 0.538           |
| ENSMUST00000103523                                       | ENSMUST00000103523         | ens Ig heavy chain V region 23 Precursor [Source:UniProtKB/Swiss-Prot;Acc:P01748] [ENSMUST00000103523]                                                        | 0.86                  | 0.009   | 0.400           | 0.71                  | 0.027   | 0.983           |
| Rprml                                                    | NM_001033212               | ref Mus musculus reprimin-like (Rprml), mRNA [NM_001033212]                                                                                                   | 0.49                  | 0.010   | 0.401           | 0.59                  | 0.001   | 0.311           |
| chr2:75493715-75494227_R                                 | chr2:75493715-75494227_R   | lincRNA:chr2:75493715-75494227 reverse strand                                                                                                                 | 0.47                  | 0.010   | 0.401           | 0.40                  | 0.025   | 0.963           |
| Pou2f3                                                   | NM_011139                  | ref Mus musculus POU domain, class 2, transcription factor 3 (Pou2f3), mRNA [NM_011139]                                                                       | 0.44                  | 0.010   | 0.403           | 0.32                  | 0.030   | 0.998           |
| LOC640869                                                | XM_918061                  | ref PREDICTED: Mus musculus similar to Leo1, Paf1/RNA polymerase II complex component, homolog (S. cerevisiae) (LOC640869), mRNA [XM_918061]                  | 0.38                  | 0.010   | 0.403           | 0.34                  | 0.030   | 0.998           |
| chr2:27394711-27402186_F                                 | chr2:27394711-27402186_F   | lincRNA:chr2:27394711-27402186 forward strand                                                                                                                 | 0.50                  | 0.010   | 0.403           | 0.56                  | 0.003   | 0.495           |
| AI844685                                                 | DV038867                   | gb BalbClig05_01_E19.x1 FH BalbClig05 Mus musculus cDNA clone BalbClig05_01_E19 similar to Prostaglandin E receptor 3 (subtype EP3), mRNA sequence [DV038867] | 0.59                  | 0.010   | 0.405           | 0.46                  | 0.017   | 0.854           |
| XM_001479485                                             | XM_001479485               | ref PREDICTED: Mus musculus hypothetical protein LOC100043178 (LOC100043178), mRNA [XM_001479485]                                                             | 0.46                  | 0.010   | 0.406           | 0.45                  | 0.014   | 0.821           |
| LOC628062                                                | AK081638                   | gb Mus musculus 16 days embryo head cDNA, RIKEN full-length enriched library, clone:C130058A18 product:unclassifiable, full insert sequence. [AK081638]       | 0.63                  | 0.011   | 0.406           | 0.68                  | 0.010   | 0.764           |
| LOC100045098                                             | XR_031396                  | ref PREDICTED: Mus musculus similar to spermatogenesis-related gene 4 (LOC100045098), misc RNA [XR_031396]                                                    | 0.64                  | 0.011   | 0.407           | 0.52                  | 0.029   | 0.986           |
| Aacs                                                     | NM_030210                  | ref Mus musculus acetoacetyl-CoA synthetase (Aacs), mRNA [NM_030210]                                                                                          | 0.41                  | 0.011   | 0.407           | 0.67                  | 0.000   | 0.024           |
| ENSMUST00000098471                                       | ENSMUST00000098471         | ens ataxia telangiectasia and Rad3 related Gene [Source:MGI Symbol;Acc:MGI:108028] [ENSMUST00000098471]                                                       | 0.47                  | 0.011   | 0.407           | 0.42                  | 0.011   | 0.766           |

Online Supplemental Table IV: mG4H-Veh and mG4H-STZ Both

| Gene Symbol                | RefSeq                     | Description                                                                                        | logFC<br>mG4H-<br>STZ | P-value | Adj.<br>P-value | logFC<br>mG4H-<br>Veh | P-value | Adj.<br>P-value |
|----------------------------|----------------------------|----------------------------------------------------------------------------------------------------|-----------------------|---------|-----------------|-----------------------|---------|-----------------|
| chr3:93582250-93592950_F   | chr3:93582250-93592950_F   | lincRNA:chr3:93582250-93592950 forward strand                                                      | 0.63                  | 0.011   | 0.407           | 0.45                  | 0.045   | 1.000           |
| Etv2                       | NM_007959                  | ref Mus musculus ets variant gene 2 (Etv2), mRNA [NM_007959]                                       | 0.40                  | 0.012   | 0.408           | 0.48                  | 0.025   | 0.960           |
| Olf223                     | NM_146429                  | ref Mus musculus olfactory receptor 223 (Olf223), mRNA [NM_146429]                                 | 0.51                  | 0.012   | 0.408           | 0.59                  | 0.020   | 0.895           |
| Acpl2                      | NM_153420                  | ref Mus musculus acid phosphatase-like 2 (Acpl2), mRNA [NM_153420]                                 | 0.31                  | 0.012   | 0.410           | 0.20                  | 0.040   | 1.000           |
| 2310004N24Rik              | NM_027107                  | ref Mus musculus RIKEN cDNA 2310004N24 gene (2310004N24Rik), mRNA [NM_027107]                      | 0.44                  | 0.012   | 0.411           | 0.42                  | 0.007   | 0.672           |
| Snrpn                      | NM_013670                  | ref Mus musculus small nuclear ribonucleoprotein N (Snrpn), transcript variant 1, mRNA [NM_013670] | 0.75                  | 0.013   | 0.412           | 0.69                  | 0.001   | 0.195           |
| chr3:68867193-68876128_F   | chr3:68867193-68876128_F   | lincRNA:chr3:68867193-68876128 forward strand                                                      | 0.61                  | 0.013   | 0.412           | 0.57                  | 0.043   | 1.000           |
| chr8:122728333-122752130_R | chr8:122728333-122752130_R | lincRNA:chr8:122728333-122752130 reverse strand                                                    | 0.36                  | 0.013   | 0.412           | 0.26                  | 0.037   | 1.000           |
| ENSMUST00000086681         | ENSMUST00000086681         | ens cadherin 7, type 2 Gene [Source:MGI (curated);Acc:MGI:2442792] [ENSMUST00000086681]            | 0.71                  | 0.013   | 0.412           | 0.44                  | 0.040   | 1.000           |
| ENSMUST00000105620         | ENSMUST00000105620         | ens RIKEN cDNA C030017K20 gene Gene [Source:MGI Symbol;Acc:MGI:2686516] [ENSMUST00000105620]       | 0.49                  | 0.013   | 0.412           | 0.41                  | 0.024   | 0.957           |
| Gm4566                     | NR_028023                  | ref Mus musculus predicted gene 4566 (Gm4566), non-coding RNA [NR_028023]                          | 0.65                  | 0.013   | 0.412           | 0.57                  | 0.031   | 1.000           |
| Jakmip2                    | NM_001163637               | ref Mus musculus janus kinase and microtubule interacting protein 2 (Jakmip2), mRNA [NM_001163637] | 0.61                  | 0.013   | 0.412           | 0.44                  | 0.034   | 1.000           |
| Fam170a                    | NM_001004061               | ref Mus musculus family with sequence similarity 170, member A (Fam170a), mRNA [NM_001004061]      | 0.65                  | 0.013   | 0.412           | 0.68                  | 0.027   | 0.983           |
| Lyg1                       | NM_027111                  | ref Mus musculus lysozyme G-like 1 (Lyg1), mRNA [NM_027111]                                        | 0.55                  | 0.014   | 0.414           | 0.47                  | 0.029   | 0.986           |
| chr9:27148989-27155714_R   | chr9:27148989-27155714_R   | lincRNA:chr9:27148989-27155714 reverse strand                                                      | 0.73                  | 0.015   | 0.419           | 0.62                  | 0.031   | 1.000           |
| chr4:135138014-135174889_F | chr4:135138014-135174889_F | lincRNA:chr4:135138014-135174889 forward strand                                                    | 0.67                  | 0.015   | 0.419           | 0.50                  | 0.029   | 0.988           |

| Online Supplemental Table IV: mG4H-Veh and mG4H-STZ Both |                            |                                                                                                                                                       |                       |         |                 |                       |         |                 |
|----------------------------------------------------------|----------------------------|-------------------------------------------------------------------------------------------------------------------------------------------------------|-----------------------|---------|-----------------|-----------------------|---------|-----------------|
| Gene Symbol                                              | RefSeq                     | Description                                                                                                                                           | logFC<br>mG4H-<br>STZ | P-value | Adj.<br>P-value | logFC<br>mG4H-<br>Veh | P-value | Adj.<br>P-value |
| <b>Snrpn</b>                                             | NM_001082962               | ref Mus musculus small nuclear ribonucleoprotein N (Snrpn), transcript variant 3, mRNA [NM_001082962]                                                 | 0.69                  | 0.015   | 0.423           | 0.70                  | 0.001   | 0.229           |
| <b>AU017674</b>                                          | CK334688                   | gb H3092H12-5 NIA Mouse 15K cDNA Clone Set Mus musculus cDNA clone H3092H12 5', mRNA sequence [CK334688]                                              | 0.34                  | 0.016   | 0.425           | 0.36                  | 0.013   | 0.808           |
| <b>chr8:49865327-49865639_R</b>                          | chr8:49865327-49865639_R   | lincRNA:chr8:49865327-49865639 reverse strand                                                                                                         | 0.40                  | 0.016   | 0.426           | 0.33                  | 0.034   | 1.000           |
| <b>2310043D23Rik</b>                                     | AK009774                   | gb Mus musculus adult male tongue cDNA, RIKEN full-length enriched library, clone:2310043D23 product:unclassifiable, full insert sequence. [AK009774] | 0.50                  | 0.016   | 0.426           | 0.44                  | 0.028   | 0.983           |
| <b>chr8:24329249-24329541_F</b>                          | chr8:24329249-24329541_F   | lincRNA:chr8:24329249-24329541 forward strand                                                                                                         | 0.40                  | 0.018   | 0.435           | 0.48                  | 0.002   | 0.343           |
| <b>chr2:158169020-158191295_F</b>                        | chr2:158169020-158191295_F | lincRNA:chr2:158169020-158191295 forward strand                                                                                                       | 0.39                  | 0.018   | 0.435           | 0.45                  | 0.010   | 0.747           |
| <b>Olfr922</b>                                           | NM_146781                  | ref Mus musculus olfactory receptor 922 (Olfr922), mRNA [NM_146781]                                                                                   | 0.44                  | 0.018   | 0.436           | 0.49                  | 0.007   | 0.686           |
| <b>Phkg1</b>                                             | NM_011079                  | ref Mus musculus phosphorylase kinase gamma 1 (Phkg1), mRNA [NM_011079]                                                                               | 0.38                  | 0.018   | 0.437           | 0.43                  | 0.002   | 0.345           |
| <b>Klhl31</b>                                            | NM_172925                  | ref Mus musculus kelch-like 31 (Drosophila) (Klhl31), mRNA [NM_172925]                                                                                | 0.27                  | 0.018   | 0.437           | 0.29                  | 0.004   | 0.538           |
| <b>chrX:50087925-50101700_R</b>                          | chrX:50087925-50101700_R   | lincRNA:chrX:50087925-50101700 reverse strand                                                                                                         | 0.43                  | 0.019   | 0.437           | 0.35                  | 0.032   | 1.000           |
| <b>Kctd6</b>                                             | NM_027782                  | ref Mus musculus potassium channel tetramerisation domain containing 6 (Kctd6), mRNA [NM_027782]                                                      | 0.42                  | 0.019   | 0.437           | 0.25                  | 0.009   | 0.720           |
| <b>Gm10451</b>                                           | NR_028520                  | ref Mus musculus predicted gene 10451 (Gm10451), non-coding RNA [NR_028520]                                                                           | 0.35                  | 0.019   | 0.439           | 0.31                  | 0.034   | 1.000           |
| <b>ENSMUST00000109244</b>                                | ENSMUST00000109244         | ref PREDICTED: Mus musculus cell division cycle 20 homolog B (S. cerevisiae) (Cdc20b), mRNA [XM_138861]                                               | 0.55                  | 0.019   | 0.439           | 0.49                  | 0.045   | 1.000           |
| <b>chr17:88466300-88495175_R</b>                         | chr17:88466300-88495175_R  | lincRNA:chr17:88466300-88495175 reverse strand                                                                                                        | 0.60                  | 0.019   | 0.439           | 0.55                  | 0.019   | 0.881           |

Online Supplemental Table IV: mG4H-Veh and mG4H-STZ Both

| Gene Symbol                       | RefSeq                     | Description                                                                                 | logFC<br>mG4H-<br>STZ | P-value | Adj.<br>P-value | logFC<br>mG4H-<br>Veh | P-value | Adj.<br>P-value |
|-----------------------------------|----------------------------|---------------------------------------------------------------------------------------------|-----------------------|---------|-----------------|-----------------------|---------|-----------------|
| <b>1110038D17Rik</b>              | NM_175133                  | ref Mus musculus RIKEN cDNA 1110038D17 gene (1110038D17Rik), mRNA [NM_175133]               | 0.29                  | 0.020   | 0.444           | 0.21                  | 0.011   | 0.770           |
| <b>Irx2</b>                       | NM_010574                  | ref Mus musculus Iroquois related homeobox 2 (Drosophila) (Irx2), mRNA [NM_010574]          | 0.77                  | 0.020   | 0.445           | 0.92                  | 0.000   | 0.119           |
| <b>chr15:73227424-73257474_R</b>  | chr15:73227424-73257474_R  | lincRNA:chr15:73227424-73257474 reverse strand                                              | 0.40                  | 0.020   | 0.447           | 0.47                  | 0.000   | 0.156           |
| <b>chr12:88216358-88221647_F</b>  | chr12:88216358-88221647_F  | lincRNA:chr12:88216358-88221647 forward strand                                              | 0.38                  | 0.021   | 0.447           | 0.43                  | 0.039   | 1.000           |
| <b>Gm15303</b>                    | XR_001809                  | ref PREDICTED: Mus musculus predicted gene, EG665969 (EG665969), misc RNA [XR_001809]       | 0.78                  | 0.021   | 0.449           | 0.68                  | 0.042   | 1.000           |
| <b>Gm16042</b>                    | XR_031071                  | ref PREDICTED: Mus musculus similar to F-box protein 5 (LOC100044855), misc RNA [XR_031071] | 0.75                  | 0.021   | 0.450           | 0.72                  | 0.019   | 0.881           |
| <b>Gm6309</b>                     | XM_886734                  | ref PREDICTED: Mus musculus predicted gene, EG622306 (EG622306), mRNA [XM_886734]           | 0.53                  | 0.021   | 0.450           | 0.55                  | 0.014   | 0.825           |
| <b>Aqp4</b>                       | NM_009700                  | ref Mus musculus aquaporin 4 (Aqp4), mRNA [NM_009700]                                       | 0.40                  | 0.022   | 0.450           | 0.52                  | 0.010   | 0.743           |
| <b>chr4:126710640-126721240_R</b> | chr4:126710640-126721240_R | lincRNA:chr4:126710640-126721240 reverse strand                                             | 0.73                  | 0.022   | 0.450           | 0.72                  | 0.048   | 1.000           |
| <b>Olfr823</b>                    | NM_146673                  | ref Mus musculus olfactory receptor 823 (Olfr823), mRNA [NM_146673]                         | 0.62                  | 0.022   | 0.452           | 0.57                  | 0.026   | 0.973           |
| <b>chr13:70745306-70837331_F</b>  | chr13:70745306-70837331_F  | lincRNA:chr13:70745306-70837331 forward strand                                              | 0.48                  | 0.022   | 0.452           | 0.52                  | 0.004   | 0.574           |
| <b>chr3:26982754-26983352_R</b>   | chr3:26982754-26983352_R   | lincRNA:chr3:26982754-26983352 reverse strand                                               | 0.58                  | 0.022   | 0.452           | 0.68                  | 0.009   | 0.712           |
| <b>Pom121</b>                     | NM_148932                  | ref Mus musculus nuclear pore membrane protein 121 (Pom121), mRNA [NM_148932]               | 0.28                  | 0.022   | 0.453           | 0.24                  | 0.020   | 0.897           |
| <b>chr4:147156425-147183949_R</b> | chr4:147156425-147183949_R | lincRNA:chr4:147156425-147183949 reverse strand                                             | 0.47                  | 0.023   | 0.453           | 0.62                  | 0.023   | 0.935           |
| <b>Tcfec</b>                      | NM_031198                  | ref Mus musculus transcription factor EC (Tcfec), mRNA [NM_031198]                          | 0.36                  | 0.023   | 0.453           | 0.35                  | 0.007   | 0.686           |
| <b>Ch25h</b>                      | NM_009890                  | ref Mus musculus cholesterol 25-hydroxylase (Ch25h), mRNA [NM_009890]                       | 0.63                  | 0.023   | 0.453           | 0.44                  | 0.027   | 0.982           |

Online Supplemental Table IV: mG4H-Veh and mG4H-STZ Both

| Gene Symbol                       | RefSeq                     | Description                                                                                                            | logFC<br>mG4H-<br>STZ | P-value | Adj.<br>P-value | logFC<br>mG4H-<br>Veh | P-value | Adj.<br>P-value |
|-----------------------------------|----------------------------|------------------------------------------------------------------------------------------------------------------------|-----------------------|---------|-----------------|-----------------------|---------|-----------------|
| <b>ENSMUST00000071867</b>         | ENSMUST00000071867         | ens vomeronasal 2, receptor 66 Gene [Source:MGI (curated);Acc:MGI:3588220] [ENSMUST00000071867]                        | 0.84                  | 0.023   | 0.455           | 0.76                  | 0.047   | 1.000           |
| <b>LOC673387</b>                  | XM_001476321               | ref PREDICTED: Mus musculus similar to olfactory receptor Olfr471 (LOC673387), mRNA [XM_001476321]                     | 0.81                  | 0.023   | 0.456           | 0.59                  | 0.049   | 1.000           |
| <b>Col25a1</b>                    | ENSMUST00000106353         | ens collagen, type XXV, alpha 1 Gene [Source:MGI (curated);Acc:MGI:1924268] [ENSMUST00000106353]                       | 0.49                  | 0.024   | 0.459           | 0.58                  | 0.024   | 0.957           |
| <b>chr2:157236070-157249445_R</b> | chr2:157236070-157249445_R | lincRNA:chr2:157236070-157249445 reverse strand                                                                        | 1.00                  | 0.024   | 0.459           | 0.90                  | 0.044   | 1.000           |
| <b>Olfr1296-ps1</b>               | XM_001002254               | ref PREDICTED: Mus musculus similar to olfactory receptor MOR248-10 (LOC668822), mRNA [XM_001002254]                   | 0.45                  | 0.024   | 0.459           | 0.42                  | 0.030   | 0.994           |
| <b>chr13:28551902-28975446_R</b>  | chr13:28551902-28975446_R  | lincRNA:chr13:28551902-28975446 reverse strand                                                                         | 0.43                  | 0.024   | 0.459           | 0.41                  | 0.038   | 1.000           |
| <b>Cxadr</b>                      | NM_009988                  | ref Mus musculus coxsackie virus and adenovirus receptor (Cxadr), transcript variant 2, mRNA [NM_009988]               | 0.45                  | 0.025   | 0.464           | 0.27                  | 0.039   | 1.000           |
| <b>Tox</b>                        | NM_145711                  | ref Mus musculus thymocyte selection-associated high mobility group box (Tox), mRNA [NM_145711]                        | 0.58                  | 0.025   | 0.467           | 0.25                  | 0.037   | 1.000           |
| <b>Irxf1</b>                      | NM_010573                  | ref Mus musculus Iroquois related homeobox 1 (Drosophila) (Irxf1), mRNA [NM_010573]                                    | 0.67                  | 0.026   | 0.468           | 0.58                  | 0.001   | 0.244           |
| <b>Caps2</b>                      | NM_178278                  | ref Mus musculus calcyphosphine 2 (Caps2), mRNA [NM_178278]                                                            | 0.66                  | 0.027   | 0.471           | 0.62                  | 0.032   | 1.000           |
| <b>Eif4e3</b>                     | NM_025829                  | ref Mus musculus eukaryotic translation initiation factor 4E member 3 (Eif4e3), mRNA [NM_025829]                       | 0.24                  | 0.027   | 0.472           | 0.26                  | 0.011   | 0.770           |
| <b>Palmd</b>                      | NM_023245                  | ref Mus musculus palmdelphin (Palmd), mRNA [NM_023245]                                                                 | 0.26                  | 0.027   | 0.472           | 0.23                  | 0.014   | 0.825           |
| <b>LOC666181</b>                  | XR_030614                  | ref PREDICTED: Mus musculus similar to spermiogenesis specific transcript on the Y 1 (LOC666181), misc RNA [XR_030614] | 0.42                  | 0.027   | 0.472           | 0.41                  | 0.023   | 0.943           |
| <b>chr16:8748982-8757165_R</b>    | chr16:8748982-8757165_R    | lincRNA:chr16:8748982-8757165 reverse strand                                                                           | 0.61                  | 0.027   | 0.472           | 0.55                  | 0.029   | 0.986           |
| <b>chr2:104702675-104736600_R</b> | chr2:104702675-104736600_R | lincRNA:chr2:104702675-104736600 reverse strand                                                                        | 0.56                  | 0.028   | 0.474           | 0.63                  | 0.028   | 0.985           |



Online Supplemental Table IV: mG4H-Veh and mG4H-STZ Both

| Gene Symbol                       | RefSeq                     | Description                                                                                                                                                 | logFC<br>mG4H-<br>STZ | P-value | Adj.<br>P-value | logFC<br>mG4H-<br>Veh | P-value | Adj.<br>P-value |
|-----------------------------------|----------------------------|-------------------------------------------------------------------------------------------------------------------------------------------------------------|-----------------------|---------|-----------------|-----------------------|---------|-----------------|
| <b>Ttc25</b>                      | NM_028918                  | ref Mus musculus tetratricopeptide repeat domain 25 (Ttc25), mRNA [NM_028918]                                                                               | 0.38                  | 0.028   | 0.476           | 0.83                  | 0.001   | 0.327           |
| <b>4930542D17Rik</b>              | AK016020                   | gb Mus musculus adult male testis cDNA, RIKEN full-length enriched library, clone:4930542D17 product:hypothetical protein, full insert sequence. [AK016020] | 0.73                  | 0.028   | 0.476           | 0.73                  | 0.035   | 1.000           |
| <b>ENSMUST00000101619</b>         | ENSMUST00000101619         | ens Putative uncharacterized protein [Source:UniProtKB/TrEMBL;Acc:Q3UEV0] [ENSMUST00000101619]                                                              | 0.38                  | 0.029   | 0.477           | 0.32                  | 0.022   | 0.929           |
| <b>LOC100045846</b>               | XM_001475017               | ref PREDICTED: Mus musculus similar to CDNA sequence AK129341 (LOC100045846), mRNA [XM_001475017]                                                           | 0.45                  | 0.029   | 0.477           | 0.51                  | 0.003   | 0.503           |
| <b>ENSMUST00000053799</b>         | ENSMUST00000053799         | ens RIKEN cDNA 9330101J02 gene Gene [Source:MGI Symbol;Acc:MGI:2444387] [ENSMUST00000053799]                                                                | 0.71                  | 0.029   | 0.477           | 0.72                  | 0.033   | 1.000           |
| <b>chr6:140557582-140557917_F</b> | chr6:140557582-140557917_F | lincRNA:chr6:140557582-140557917 forward strand                                                                                                             | 0.37                  | 0.030   | 0.477           | 0.32                  | 0.025   | 0.960           |
| <b>Gm3293</b>                     | XM_001476247               | ref PREDICTED: Mus musculus similar to Ubtff protein (LOC100041366), mRNA [XM_001476247]                                                                    | 0.45                  | 0.030   | 0.479           | 0.53                  | 0.008   | 0.708           |
| <b>2310001K24Rik</b>              | NR_028122                  | ref Mus musculus RIKEN cDNA 2310001K24 gene (2310001K24Rik), non-coding RNA [NR_028122]                                                                     | 0.42                  | 0.030   | 0.479           | 0.26                  | 0.019   | 0.882           |
| <b>Zfp523</b>                     | NM_172617                  | ref Mus musculus zinc finger protein 523 (Zfp523), mRNA [NM_172617]                                                                                         | 0.27                  | 0.030   | 0.479           | 0.23                  | 0.020   | 0.885           |
| <b>4930455C13Rik</b>              | AK015459                   | gb Mus musculus adult male testis cDNA, RIKEN full-length enriched library, clone:4930455C13 product:unclassifiable, full insert sequence. [AK015459]       | 0.48                  | 0.031   | 0.480           | 0.44                  | 0.038   | 1.000           |
| <b>chr4:11049325-11072075_R</b>   | chr4:11049325-11072075_R   | lincRNA:chr4:11049325-11072075 reverse strand                                                                                                               | 0.36                  | 0.031   | 0.483           | 0.47                  | 0.006   | 0.628           |
| <b>AI132487</b>                   | NM_001012310               | ref Mus musculus expressed sequence AI132487 (AI132487), mRNA [NM_001012310]                                                                                | 0.31                  | 0.031   | 0.483           | 0.66                  | 0.000   | 0.008           |
| <b>Ddhd2</b>                      | NM_028102                  | ref Mus musculus DDHD domain containing 2 (Ddhd2), mRNA [NM_028102]                                                                                         | 0.25                  | 0.032   | 0.485           | 0.20                  | 0.026   | 0.975           |
| <b>Gm6725</b>                     | XM_891592                  | ref PREDICTED: Mus musculus predicted gene, EG626970 (EG626970), mRNA [XM_891592]                                                                           | 0.61                  | 0.033   | 0.489           | 0.76                  | 0.012   | 0.793           |

| Online Supplemental Table IV: mG4H-Veh and mG4H-STZ Both |                            |                                                                                                                                                       |                       |         |                 |                       |         |                 |
|----------------------------------------------------------|----------------------------|-------------------------------------------------------------------------------------------------------------------------------------------------------|-----------------------|---------|-----------------|-----------------------|---------|-----------------|
| Gene Symbol                                              | RefSeq                     | Description                                                                                                                                           | logFC<br>mG4H-<br>STZ | P-value | Adj.<br>P-value | logFC<br>mG4H-<br>Veh | P-value | Adj.<br>P-value |
| Gbp8                                                     | NM_029509                  | ref Mus musculus guanylate-binding protein 8 (Gbp8), mRNA [NM_029509]                                                                                 | 0.53                  | 0.033   | 0.489           | 0.67                  | 0.013   | 0.794           |
| Onecut3                                                  | NM_139226                  | ref Mus musculus one cut domain, family member 3 (Onecut3), mRNA [NM_139226]                                                                          | 0.52                  | 0.033   | 0.490           | 0.52                  | 0.017   | 0.854           |
| LOC100040235                                             | XM_001474135               | ref PREDICTED: Mus musculus similar to spermiogenesis specific transcript on the Y 1 (LOC100040235), mRNA [XM_001474135]                              | 0.37                  | 0.034   | 0.491           | 0.35                  | 0.034   | 1.000           |
| PrI8a2                                                   | NM_010088                  | ref Mus musculus prolactin family 8, subfamily a, member 2 (PrI8a2), mRNA [NM_010088]                                                                 | 0.57                  | 0.034   | 0.493           | 0.66                  | 0.013   | 0.808           |
| Gm14460                                                  | XR_032600                  | ref PREDICTED: Mus musculus similar to RPL10L protein (LOC383717), misc RNA [XR_032600]                                                               | 0.80                  | 0.034   | 0.493           | 0.80                  | 0.034   | 1.000           |
| ENSMUST00000065159                                       | ENSMUST00000065159         | ens Putative uncharacterized protein Fragment [Source:UniProtKB/TrEMBL;Acc:Q8BT27] [ENSMUST00000065159]                                               | 0.33                  | 0.034   | 0.493           | 0.28                  | 0.006   | 0.654           |
| chrX:132445535-132448486_F                               | chrX:132445535-132448486_F | lincRNA:chrX:132445535-132448486 forward strand                                                                                                       | 0.60                  | 0.034   | 0.493           | 0.71                  | 0.015   | 0.827           |
| Rp1l1                                                    | NM_146246                  | ref Mus musculus retinitis pigmentosa 1 homolog (human)-like 1 (Rp1l1), mRNA [NM_146246]                                                              | 0.49                  | 0.035   | 0.493           | 0.47                  | 0.049   | 1.000           |
| chr19:7458725-7474825_F                                  | chr19:7458725-7474825_F    | lincRNA:chr19:7458725-7474825 forward strand                                                                                                          | 0.31                  | 0.035   | 0.494           | 0.21                  | 0.022   | 0.930           |
| Cyp2b23                                                  | NM_001081148               | ref Mus musculus cytochrome P450, family 2, subfamily b, polypeptide 23 (Cyp2b23), mRNA [NM_001081148]                                                | 0.48                  | 0.035   | 0.495           | 0.52                  | 0.042   | 1.000           |
| Kdm4dl                                                   | XM_911001                  | ref PREDICTED: Mus musculus predicted gene, EG547035 (EG547035), mRNA [XM_911001]                                                                     | 0.41                  | 0.035   | 0.495           | 0.47                  | 0.013   | 0.808           |
| LOC100045381                                             | XM_001474708               | ref PREDICTED: Mus musculus hypothetical protein LOC100045381 (LOC100045381), mRNA [XM_001474708]                                                     | 0.85                  | 0.036   | 0.495           | 1.08                  | 0.009   | 0.718           |
| 4930413F20Rik                                            | AK015129                   | gb Mus musculus adult male testis cDNA, RIKEN full-length enriched library, clone:4930413F20 product:unclassifiable, full insert sequence. [AK015129] | 0.97                  | 0.036   | 0.495           | 1.08                  | 0.035   | 1.000           |
| 2010111I01Rik                                            | ENSMUST00000021911         | ens RIKEN cDNA 2010111I01 gene Gene [Source:MGI Symbol;Acc:MGI:1919311] [ENSMUST00000021911]                                                          | 0.27                  | 0.036   | 0.495           | 0.24                  | 0.023   | 0.943           |
| Muc3                                                     | ENSMUST00000041226         | ens mucin 3, intestinal Gene [Source:MGI Symbol;Acc:MGI:1203527] [ENSMUST00000041226]                                                                 | 0.61                  | 0.036   | 0.495           | 0.78                  | 0.013   | 0.808           |

| Online Supplemental Table IV: mG4H-Veh and mG4H-STZ Both |                            |                                                                                                                            |                       |         |                 |                       |         |                 |
|----------------------------------------------------------|----------------------------|----------------------------------------------------------------------------------------------------------------------------|-----------------------|---------|-----------------|-----------------------|---------|-----------------|
| Gene Symbol                                              | RefSeq                     | Description                                                                                                                | logFC<br>mG4H-<br>STZ | P-value | Adj.<br>P-value | logFC<br>mG4H-<br>Veh | P-value | Adj.<br>P-value |
| Gm1587                                                   | NM_001033440               | ref Mus musculus predicted gene 1587 (Gm1587), mRNA [NM_001033440]                                                         | 0.49                  | 0.036   | 0.495           | 0.42                  | 0.040   | 1.000           |
| Olfr622                                                  | NM_147083                  | ref Mus musculus olfactory receptor 622 (Olfr622), mRNA [NM_147083]                                                        | 0.58                  | 0.036   | 0.495           | 0.55                  | 0.036   | 1.000           |
| chr10:92798725-92811622_F                                | chr10:92798725-92811622_F  | lincRNA:chr10:92798725-92811622 forward strand                                                                             | 0.33                  | 0.038   | 0.499           | 0.32                  | 0.034   | 1.000           |
| chr5:122994397-122995017_R                               | chr5:122994397-122995017_R | lincRNA:chr5:122994397-122995017 reverse strand                                                                            | 0.40                  | 0.038   | 0.499           | 0.43                  | 0.008   | 0.694           |
| Zfp93                                                    | NM_009567                  | ref Mus musculus zinc finger protein 93 (Zfp93), mRNA [NM_009567]                                                          | 0.48                  | 0.038   | 0.499           | 0.51                  | 0.027   | 0.983           |
| chr3:41158056-41173053_F                                 | chr3:41158056-41173053_F   | lincRNA:chr3:41158056-41173053 forward strand                                                                              | 0.37                  | 0.039   | 0.501           | 0.42                  | 0.035   | 1.000           |
| LOC100047087                                             | XM_001477933               | ref PREDICTED: Mus musculus hypothetical protein LOC100047087 (LOC100047087), mRNA [XM_001477933]                          | 0.38                  | 0.040   | 0.502           | 0.52                  | 0.027   | 0.981           |
| chr11:68200716-68214458_F                                | chr11:68200716-68214458_F  | lincRNA:chr11:68200716-68214458 forward strand                                                                             | 0.33                  | 0.040   | 0.504           | 0.38                  | 0.038   | 1.000           |
| ENSMUST00000028141                                       | ENSMUST00000028141         | ens RIKEN cDNA 6530402F18 gene Gene [Source:MGI Symbol;Acc:MGI:1923470] [ENSMUST00000028141]                               | 0.43                  | 0.040   | 0.504           | 0.51                  | 0.049   | 1.000           |
| LOC100045031                                             | XM_001473537               | ref  PREDICTED: Mus musculus similar to transcription elongation factor A (SII)-like 8 (LOC100045031), mRNA [XM_001473537] | 0.54                  | 0.040   | 0.504           | 0.54                  | 0.026   | 0.972           |
| chr4:119406384-119407856_F                               | chr4:119406384-119407856_F | lincRNA:chr4:119406384-119407856 forward strand                                                                            | 0.34                  | 0.041   | 0.505           | 0.33                  | 0.019   | 0.882           |
| chr13:83867711-83878140_F                                | chr13:83867711-83878140_F  | lincRNA:chr13:83867711-83878140 forward strand                                                                             | 0.49                  | 0.041   | 0.505           | 0.65                  | 0.007   | 0.679           |
| Gm7546                                                   | XM_975528                  | ref  PREDICTED: Mus musculus predicted gene, EG665234 (EG665234), mRNA [XM_975528]                                         | 0.76                  | 0.041   | 0.506           | 0.74                  | 0.041   | 1.000           |
| chr6:39205913-39248468_R                                 | chr6:39205913-39248468_R   | lincRNA:chr6:39205913-39248468 reverse strand                                                                              | 0.32                  | 0.042   | 0.508           | 0.38                  | 0.011   | 0.766           |

| Online Supplemental Table IV: mG4H-Veh and mG4H-STZ Both |                           |                                                                                                          |                       |         |                 |                       |         |                 |
|----------------------------------------------------------|---------------------------|----------------------------------------------------------------------------------------------------------|-----------------------|---------|-----------------|-----------------------|---------|-----------------|
| Gene Symbol                                              | RefSeq                    | Description                                                                                              | logFC<br>mG4H-<br>STZ | P-value | Adj.<br>P-value | logFC<br>mG4H-<br>Veh | P-value | Adj.<br>P-value |
| <b>Slco1a6</b>                                           | NM_023718                 | ref Mus musculus solute carrier organic anion transporter family, member 1a6 (Slco1a6), mRNA [NM_023718] | 1.06                  | 0.043   | 0.510           | 1.03                  | 0.044   | 1.000           |
| <b>chr11:6421951-6429173_R</b>                           | chr11:6421951-6429173_R   | lincRNA:chr11:6421951-6429173 reverse strand                                                             | 0.70                  | 0.043   | 0.510           | 0.95                  | 0.011   | 0.766           |
| <b>Klk6</b>                                              | NM_011177                 | ref Mus musculus kallikrein related-peptidase 6 (Klk6), transcript variant 1, mRNA [NM_011177]           | 0.22                  | 0.044   | 0.512           | 0.33                  | 0.016   | 0.848           |
| <b>3632451O06Rik</b>                                     | NM_026142                 | ref Mus musculus RIKEN cDNA 3632451O06 gene (3632451O06Rik), mRNA [NM_026142]                            | 0.31                  | 0.044   | 0.512           | 0.36                  | 0.001   | 0.263           |
| <b>Zfp187</b>                                            | NM_001013786              | ref Mus musculus zinc finger protein 187 (Zfp187), mRNA [NM_001013786]                                   | 0.33                  | 0.044   | 0.513           | 0.30                  | 0.040   | 1.000           |
| <b>HOTAIR</b>                                            | HOTAIR                    | lincRNA:chr15:102774492-102778161 reverse strand                                                         | 0.61                  | 0.044   | 0.513           | 0.78                  | 0.016   | 0.848           |
| <b>4930473D10Rik</b>                                     | XM_001480387              | ref PREDICTED: Mus musculus RIKEN cDNA 4930473D10 gene (4930473D10Rik), mRNA [XM_001480387]              | 0.44                  | 0.045   | 0.513           | 0.46                  | 0.042   | 1.000           |
| <b>ENSMUST00000103468</b>                                | ENSMUST00000103468        | gb Mus musculus (clone 16-P) IgM chain mRNA, VDNJ3 region. [M26464]                                      | 0.60                  | 0.046   | 0.513           | 0.56                  | 0.011   | 0.774           |
| <b>Rnf10</b>                                             | NM_016698                 | ref Mus musculus ring finger protein 10 (Rnf10), mRNA [NM_016698]                                        | 0.25                  | 0.046   | 0.513           | 0.26                  | 0.006   | 0.651           |
| <b>chr3:35782698-35789748_F</b>                          | chr3:35782698-35789748_F  | lincRNA:chr3:35782698-35789748 forward strand                                                            | 0.85                  | 0.046   | 0.513           | 0.97                  | 0.045   | 1.000           |
| <b>Wisp3</b>                                             | NM_001127376              | ref Mus musculus WNT1 inducible signaling pathway protein 3 (Wisp3), mRNA [NM_001127376]                 | 0.28                  | 0.047   | 0.514           | 0.37                  | 0.012   | 0.793           |
| <b>chr13:94180737-94182912_F</b>                         | chr13:94180737-94182912_F | lincRNA:chr13:94180737-94182912 forward strand                                                           | 0.33                  | 0.047   | 0.514           | 0.26                  | 0.012   | 0.793           |
| <b>Grif1</b>                                             | NM_172739                 | ref Mus musculus glucocorticoid receptor DNA binding factor 1 (Grif1), mRNA [NM_172739]                  | 0.26                  | 0.047   | 0.515           | 0.22                  | 0.048   | 1.000           |
| <b>Gpi1</b>                                              | NM_008155                 | ref Mus musculus glucose phosphate isomerase 1 (Gpi1), mRNA [NM_008155]                                  | 0.19                  | 0.048   | 0.517           | 0.19                  | 0.012   | 0.786           |
| <b>4930404A10Rik</b>                                     | NM_029105                 | ref Mus musculus RIKEN cDNA 4930404A10 gene (4930404A10Rik), mRNA [NM_029105]                            | 0.47                  | 0.049   | 0.519           | 0.42                  | 0.048   | 1.000           |

Online Supplemental Table IV: mG4H-Veh and mG4H-STZ Both

| Gene Symbol                    | RefSeq                  | Description                                                                                                    | logFC<br>mG4H-<br>STZ | P-value | Adj.<br>P-value | logFC<br>mG4H-<br>Veh | P-value | Adj.<br>P-value |
|--------------------------------|-------------------------|----------------------------------------------------------------------------------------------------------------|-----------------------|---------|-----------------|-----------------------|---------|-----------------|
| <b>Pias3</b>                   | NM_018812               | ref Mus musculus protein inhibitor of activated STAT 3 (Pias3), transcript variant 2, mRNA [NM_018812]         | 0.40                  | 0.049   | 0.519           | 0.40                  | 0.008   | 0.708           |
| <b>Gfra2</b>                   | NM_008115               | ref Mus musculus glial cell line derived neurotrophic factor family receptor alpha 2 (Gfra2), mRNA [NM_008115] | -0.50                 | 0.028   | 0.476           | 0.23                  | 0.041   | 1.000           |
| <b>Mboat1</b>                  | NM_153546               | ref Mus musculus membrane bound O-acyltransferase domain containing 1 (Mboat1), mRNA [NM_153546]               | -0.74                 | 0.036   | 0.495           | 0.20                  | 0.026   | 0.973           |
| <b>Dbh</b>                     | NM_138942               | ref Mus musculus dopamine beta hydroxylase (Dbh), mRNA [NM_138942]                                             | -0.99                 | 0.041   | 0.505           | 0.48                  | 0.001   | 0.259           |
| <b>Ap1s1</b>                   | NM_007457               | ref Mus musculus adaptor protein complex AP-1, sigma 1 (Ap1s1), mRNA [NM_007457]                               | -0.58                 | 0.000   | 0.090           | -0.34                 | 0.002   | 0.377           |
| <b>Ap1s1</b>                   | NM_007457               | ref Mus musculus adaptor protein complex AP-1, sigma 1 (Ap1s1), mRNA [NM_007457]                               | -0.55                 | 0.000   | 0.123           | -0.32                 | 0.001   | 0.311           |
| <b>Cd160</b>                   | NM_018767               | ref Mus musculus CD160 antigen (Cd160), transcript variant 2, mRNA [NM_018767]                                 | -0.56                 | 0.001   | 0.167           | -0.47                 | 0.016   | 0.854           |
| <b>chr12:8401014-8407169_F</b> | chr12:8401014-8407169_F | lincRNA:chr12:8401014-8407169 forward strand                                                                   | -1.02                 | 0.001   | 0.169           | -0.44                 | 0.025   | 0.966           |
| <b>LOC640020</b>               | XM_916728               | ref PREDICTED: Mus musculus similar to intestinal mucin (LOC640020), mRNA [XM_916728]                          | -0.74                 | 0.001   | 0.227           | -0.77                 | 0.001   | 0.227           |
| <b>2200002J24Rik</b>           | NM_026961               | ref Mus musculus RIKEN cDNA 2200002J24 gene (2200002J24Rik), mRNA [NM_026961]                                  | -0.99                 | 0.001   | 0.234           | -0.44                 | 0.037   | 1.000           |
| <b>Gck</b>                     | NM_010292               | ref Mus musculus glucokinase (Gck), mRNA [NM_010292]                                                           | -0.57                 | 0.001   | 0.246           | -0.29                 | 0.023   | 0.946           |
| <b>ENSMUST00000054384</b>      | ENSMUST00000054384      | ens tripartite motif-containing 56 Gene [Source:MGI (curated);Acc:MGI:2685298] [ENSMUST00000054384]            | -0.63                 | 0.002   | 0.262           | -0.65                 | 0.000   | 0.022           |
| <b>Trim56</b>                  | NM_201373               | ref Mus musculus tripartite motif-containing 56 (Trim56), mRNA [NM_201373]                                     | -0.51                 | 0.002   | 0.279           | -0.61                 | 0.000   | 0.039           |
| <b>Hpn</b>                     | NM_001110252            | ref Mus musculus hepsin (Hpn), transcript variant 1, mRNA [NM_001110252]                                       | -0.51                 | 0.003   | 0.281           | -0.57                 | 0.000   | 0.188           |
| <b>Klra23</b>                  | NM_024470               | ref Mus musculus killer cell lectin-like receptor subfamily A, member 23 (Klra23), mRNA [NM_024470]            | -0.95                 | 0.003   | 0.281           | -0.59                 | 0.015   | 0.832           |

| Online Supplemental Table IV: mG4H-Veh and mG4H-STZ Both |                            |                                                                                                           |                       |         |                 |                       |         |                 |
|----------------------------------------------------------|----------------------------|-----------------------------------------------------------------------------------------------------------|-----------------------|---------|-----------------|-----------------------|---------|-----------------|
| Gene Symbol                                              | RefSeq                     | Description                                                                                               | logFC<br>mG4H-<br>STZ | P-value | Adj.<br>P-value | logFC<br>mG4H-<br>Veh | P-value | Adj.<br>P-value |
| <b>Ttc7</b>                                              | NM_028639                  | ref Mus musculus tetratricopeptide repeat domain 7 (Ttc7), mRNA [NM_028639]                               | -0.51                 | 0.003   | 0.281           | -0.19                 | 0.025   | 0.966           |
| <b>chr10:5950116-5958250_F</b>                           | chr10:5950116-5958250_F    | lincRNA:chr10:5950116-5958250 forward strand                                                              | -0.64                 | 0.003   | 0.290           | -0.43                 | 0.034   | 1.000           |
| <b>chr8:113968152-113973727_R</b>                        | chr8:113968152-113973727_R | lincRNA:chr8:113968152-113973727 reverse strand                                                           | -0.46                 | 0.004   | 0.308           | -0.25                 | 0.049   | 1.000           |
| <b>ENSMUST00000072180</b>                                | ENSMUST00000072180         | ens Putative uncharacterized protein [Source:UniProtKB/TrEMBL;Acc:Q3USB9] [ENSMUST00000072180]            | -0.73                 | 0.004   | 0.308           | -0.57                 | 0.008   | 0.708           |
| <b>Bmper</b>                                             | NM_028472                  | ref Mus musculus BMP-binding endothelial regulator (Bmper), mRNA [NM_028472]                              | -0.35                 | 0.004   | 0.316           | -0.26                 | 0.005   | 0.578           |
| <b>Hint3</b>                                             | NM_025798                  | ref Mus musculus histidine triad nucleotide binding protein 3 (Hint3), mRNA [NM_025798]                   | -0.38                 | 0.004   | 0.330           | -0.32                 | 0.007   | 0.675           |
| <b>chr6:115468025-115489250_R</b>                        | chr6:115468025-115489250_R | lincRNA:chr6:115468025-115489250 reverse strand                                                           | -0.82                 | 0.005   | 0.341           | -0.64                 | 0.022   | 0.935           |
| <b>chrX:120353972-120361170_R</b>                        | chrX:120353972-120361170_R | lincRNA:chrX:120353972-120361170 reverse strand                                                           | -0.67                 | 0.005   | 0.343           | -0.85                 | 0.050   | 1.000           |
| <b>Xist</b>                                              | NR_001463                  | ref Mus musculus inactive X specific transcripts (Xist), transcript variant 1, non-coding RNA [NR_001463] | -0.67                 | 0.005   | 0.354           | -0.57                 | 0.001   | 0.256           |
| <b>chr5:33773842-33942967_R</b>                          | chr5:33773842-33942967_R   | lincRNA:chr5:33773842-33942967 reverse strand                                                             | -0.55                 | 0.005   | 0.354           | -0.37                 | 0.041   | 1.000           |
| <b>Cst6</b>                                              | NM_028623                  | ref Mus musculus cystatin E/M (Cst6), mRNA [NM_028623]                                                    | -0.51                 | 0.005   | 0.354           | -0.59                 | 0.000   | 0.023           |
| <b>Gm3181</b>                                            | XM_001476516               | ref PREDICTED: Mus musculus hypothetical protein LOC100041175 (LOC100041175), mRNA [XM_001476516]         | -0.51                 | 0.006   | 0.356           | -0.40                 | 0.018   | 0.865           |
| <b>chr6:108157117-108162492_R</b>                        | chr6:108157117-108162492_R | lincRNA:chr6:108157117-108162492 reverse strand                                                           | -0.47                 | 0.006   | 0.366           | -0.46                 | 0.013   | 0.799           |
| <b>chr3:37659958-37665945_F</b>                          | chr3:37659958-37665945_F   | lincRNA:chr3:37659958-37665945 forward strand                                                             | -1.05                 | 0.006   | 0.369           | -0.58                 | 0.040   | 1.000           |
| <b>chr11:6748267-6818192_F</b>                           | chr11:6748267-6818192_F    | lincRNA:chr11:6748267-6818192 forward strand                                                              | -0.70                 | 0.007   | 0.370           | -0.63                 | 0.015   | 0.831           |



| Online Supplemental Table IV: mG4H-Veh and mG4H-STZ Both |                           |                                                                                                                         |                       |         |                 |                       |         |                 |
|----------------------------------------------------------|---------------------------|-------------------------------------------------------------------------------------------------------------------------|-----------------------|---------|-----------------|-----------------------|---------|-----------------|
| Gene Symbol                                              | RefSeq                    | Description                                                                                                             | logFC<br>mG4H-<br>STZ | P-value | Adj.<br>P-value | logFC<br>mG4H-<br>Veh | P-value | Adj.<br>P-value |
| <b>chr3:84609788-84618062_F</b>                          | chr3:84609788-84618062_F  | lincRNA:chr3:84609788-84618062 forward strand                                                                           | -0.51                 | 0.007   | 0.370           | -0.36                 | 0.048   | 1.000           |
| <b>Gm3346</b>                                            | XM_001477605              | ref PREDICTED: Mus musculus hypothetical protein LOC100041451, transcript variant 1 (LOC100041451), mRNA [XM_001477605] | -0.48                 | 0.007   | 0.377           | -0.29                 | 0.012   | 0.793           |
| <b>Gm5821</b>                                            | XR_002016                 | ref PREDICTED: Mus musculus predicted gene, EG545257 (EG545257), misc RNA [XR_002016]                                   | -0.50                 | 0.007   | 0.380           | -0.39                 | 0.046   | 1.000           |
| <b>Slc9a10</b>                                           | NM_198106                 | ref Mus musculus solute carrier family 9, member 10 (Slc9a10), mRNA [NM_198106]                                         | -0.70                 | 0.007   | 0.381           | -0.61                 | 0.035   | 1.000           |
| <b>Fbxl21</b>                                            | NM_178674                 | ref Mus musculus F-box and leucine-rich repeat protein 21 (Fbxl21), mRNA [NM_178674]                                    | -0.68                 | 0.007   | 0.384           | -0.43                 | 0.014   | 0.820           |
| <b>Slc24a3</b>                                           | NM_053195                 | ref Mus musculus solute carrier family 24 (sodium/potassium/calcium exchanger), member 3 (Slc24a3), mRNA [NM_053195]    | -0.38                 | 0.007   | 0.384           | -0.17                 | 0.037   | 1.000           |
| <b>Doc2g</b>                                             | NM_021791                 | ref Mus musculus double C2, gamma (Doc2g), mRNA [NM_021791]                                                             | -0.57                 | 0.008   | 0.391           | -0.50                 | 0.002   | 0.404           |
| <b>chr14:77511189-77522852_R</b>                         | chr14:77511189-77522852_R | lincRNA:chr14:77511189-77522852 reverse strand                                                                          | -0.67                 | 0.008   | 0.392           | -0.61                 | 0.050   | 1.000           |
| <b>Rcor2</b>                                             | NM_054048                 | ref Mus musculus REST corepressor 2 (Rcor2), mRNA [NM_054048]                                                           | -0.51                 | 0.009   | 0.394           | -0.32                 | 0.011   | 0.770           |
| <b>Gm3798</b>                                            | XM_001478340              | ref PREDICTED: Mus musculus hypothetical protein LOC100042341 (LOC100042341), mRNA [XM_001478340]                       | -0.59                 | 0.009   | 0.394           | -0.45                 | 0.012   | 0.793           |
| <b>ENSMUST00000070754</b>                                | ENSMUST00000070754        | ens family with sequence similarity 154, member A Gene [Source:MGI (curated);Acc:MGI:1923061] [ENSMUST00000070754]      | -1.44                 | 0.009   | 0.394           | -1.01                 | 0.028   | 0.983           |
| <b>chr8:67213300-67271700_F</b>                          | chr8:67213300-67271700_F  | lincRNA:chr8:67213300-67271700 forward strand                                                                           | -0.63                 | 0.009   | 0.398           | -0.52                 | 0.009   | 0.731           |
| <b>chr14:33923944-34003394_R</b>                         | chr14:33923944-34003394_R | lincRNA:chr14:33923944-34003394 reverse strand                                                                          | -1.70                 | 0.009   | 0.398           | -0.55                 | 0.048   | 1.000           |
| <b>Palb2</b>                                             | NM_001081238              | ref Mus musculus partner and localizer of BRCA2 (Palb2), mRNA [NM_001081238]                                            | -0.35                 | 0.010   | 0.404           | -0.33                 | 0.029   | 0.986           |

Online Supplemental Table IV: mG4H-Veh and mG4H-STZ Both

| Gene Symbol                      | RefSeq                    | Description                                                                                                       | logFC<br>mG4H-<br>STZ | P-value | Adj.<br>P-value | logFC<br>mG4H-<br>Veh | P-value | Adj.<br>P-value |
|----------------------------------|---------------------------|-------------------------------------------------------------------------------------------------------------------|-----------------------|---------|-----------------|-----------------------|---------|-----------------|
| <b>Gm14700</b>                   | XM_001474363              | ref PREDICTED: Mus musculus hypothetical protein LOC100040255 (LOC100040255), mRNA [XM_001474363]                 | -0.43                 | 0.010   | 0.405           | -0.38                 | 0.002   | 0.357           |
| <b>Lce3f</b>                     | NM_001018079              | ref Mus musculus late cornified envelope 3F (Lce3f), mRNA [NM_001018079]                                          | -0.82                 | 0.011   | 0.406           | -0.54                 | 0.034   | 1.000           |
| <b>Olf66</b>                     | NM_013618                 | ref Mus musculus olfactory receptor 66 (Olf66), mRNA [NM_013618]                                                  | -0.80                 | 0.011   | 0.406           | -0.33                 | 0.036   | 1.000           |
| <b>A430033K04Rik</b>             | NM_183025                 | ref Mus musculus RIKEN cDNA A430033K04 gene (A430033K04Rik), mRNA [NM_183025]                                     | -0.40                 | 0.011   | 0.407           | -0.39                 | 0.039   | 1.000           |
| <b>AW549877</b>                  | NM_145930                 | ref Mus musculus expressed sequence AW549877 (AW549877), mRNA [NM_145930]                                         | -0.30                 | 0.011   | 0.407           | -0.31                 | 0.007   | 0.664           |
| <b>Dhdds</b>                     | NM_026144                 | ref Mus musculus dehydrodolichyl diphosphate synthase (Dhdds), mRNA [NM_026144]                                   | -0.28                 | 0.012   | 0.408           | -0.33                 | 0.001   | 0.263           |
| <b>LOC100045752</b>              | XM_001475359              | ref PREDICTED: Mus musculus hypothetical protein LOC100045752 (LOC100045752), mRNA [XM_001475359]                 | -0.48                 | 0.012   | 0.408           | -0.67                 | 0.000   | 0.090           |
| <b>chr15:73227424-73257474_F</b> | chr15:73227424-73257474_F | lincRNA:chr15:73227424-73257474 forward strand                                                                    | -0.35                 | 0.012   | 0.410           | -0.31                 | 0.003   | 0.503           |
| <b>Zar1</b>                      | NM_174877                 | ref Mus musculus zygote arrest 1 (Zar1), mRNA [NM_174877]                                                         | -0.63                 | 0.012   | 0.410           | -0.64                 | 0.027   | 0.983           |
| <b>Mybpc2</b>                    | NM_146189                 | ref Mus musculus myosin binding protein C, fast-type (Mybpc2), transcript variant 2, mRNA [NM_146189]             | -0.39                 | 0.013   | 0.412           | -0.36                 | 0.028   | 0.983           |
| <b>Gm3390</b>                    | XM_001476541              | ref PREDICTED: Mus musculus similar to Ubtg protein (LOC100041529), mRNA [XM_001476541]                           | -0.63                 | 0.013   | 0.412           | -0.61                 | 0.048   | 1.000           |
| <b>Psd4</b>                      | NM_177611                 | ref Mus musculus pleckstrin and Sec7 domain containing 4 (Psd4), mRNA [NM_177611]                                 | -0.37                 | 0.014   | 0.414           | -0.49                 | 0.003   | 0.488           |
| <b>Tecpr1</b>                    | NM_027410                 | ref Mus musculus tectonin beta-propeller repeat containing 1 (Tecpr1), mRNA [NM_027410]                           | -0.29                 | 0.014   | 0.415           | -0.29                 | 0.004   | 0.560           |
| <b>Hist1h2bb</b>                 | NM_175664                 | ref Mus musculus histone cluster 1, H2bb (Hist1h2bb), mRNA [NM_175664]                                            | -0.32                 | 0.015   | 0.421           | -0.47                 | 0.001   | 0.205           |
| <b>Glud1</b>                     | NM_008133                 | ref Mus musculus glutamate dehydrogenase 1 (Glud1), nuclear gene encoding mitochondrial protein, mRNA [NM_008133] | -0.31                 | 0.015   | 0.422           | -0.34                 | 0.000   | 0.154           |

| Online Supplemental Table IV: mG4H-Veh and mG4H-STZ Both |                            |                                                                                                   |                       |         |                 |                       |         |                 |
|----------------------------------------------------------|----------------------------|---------------------------------------------------------------------------------------------------|-----------------------|---------|-----------------|-----------------------|---------|-----------------|
| Gene Symbol                                              | RefSeq                     | Description                                                                                       | logFC<br>mG4H-<br>STZ | P-value | Adj.<br>P-value | logFC<br>mG4H-<br>Veh | P-value | Adj.<br>P-value |
| <b>Scd3</b>                                              | NM_024450                  | ref Mus musculus stearyl-coenzyme A desaturase 3 (Scd3), mRNA [NM_024450]                         | -0.36                 | 0.015   | 0.423           | -0.23                 | 0.035   | 1.000           |
| <b>Casp1</b>                                             | NM_009807                  | ref Mus musculus caspase 1 (Casp1), mRNA [NM_009807]                                              | -0.58                 | 0.016   | 0.426           | -0.20                 | 0.036   | 1.000           |
| <b>chr8:19759348-19759959_R</b>                          | chr8:19759348-19759959_R   | lincRNA:chr8:19759348-19759959 reverse strand                                                     | -0.59                 | 0.016   | 0.428           | -0.68                 | 0.004   | 0.541           |
| <b>Bex1</b>                                              | NM_009052                  | ref Mus musculus brain expressed gene 1 (Bex1), mRNA [NM_009052]                                  | -0.94                 | 0.017   | 0.429           | -0.91                 | 0.000   | 0.016           |
| <b>Fam179a</b>                                           | NM_177087                  | ref Mus musculus family with sequence similarity 179, member A (Fam179a), mRNA [NM_177087]        | -0.34                 | 0.017   | 0.435           | -0.48                 | 0.002   | 0.385           |
| <b>Gm501</b>                                             | XM_146277                  | ref PREDICTED: Mus musculus gene model 501, (NCBI) (Gm501), mRNA [XM_146277]                      | -0.51                 | 0.018   | 0.435           | -0.37                 | 0.016   | 0.848           |
| <b>chr6:122341396-122342710_F</b>                        | chr6:122341396-122342710_F | lincRNA:chr6:122341396-122342710 forward strand                                                   | -0.78                 | 0.019   | 0.437           | -0.63                 | 0.005   | 0.602           |
| <b>1700025K23Rik</b>                                     | NM_183254                  | ref Mus musculus RIKEN cDNA 1700025K23 gene (1700025K23Rik), mRNA [NM_183254]                     | -0.26                 | 0.019   | 0.441           | -0.23                 | 0.019   | 0.881           |
| <b>Ccl21a</b>                                            | NM_011124                  | ref Mus musculus chemokine (C-C motif) ligand 21A (Ccl21a), mRNA [NM_011124]                      | -0.64                 | 0.019   | 0.441           | -0.54                 | 0.032   | 1.000           |
| <b>Lmo2</b>                                              | NM_008505                  | ref Mus musculus LIM domain only 2 (Lmo2), transcript variant 1, mRNA [NM_008505]                 | -0.28                 | 0.020   | 0.442           | -0.22                 | 0.015   | 0.828           |
| <b>chr17:7002731-7032535_R</b>                           | chr17:7002731-7032535_R    | lincRNA:chr17:7002731-7032535 reverse strand                                                      | -0.38                 | 0.020   | 0.443           | -0.29                 | 0.028   | 0.983           |
| <b>Pdzd3</b>                                             | NM_133226                  | ref Mus musculus PDZ domain containing 3 (Pdzd3), mRNA [NM_133226]                                | -0.88                 | 0.020   | 0.447           | -0.37                 | 0.034   | 1.000           |
| <b>S100a1</b>                                            | NM_011309                  | ref Mus musculus S100 calcium binding protein A1 (S100a1), mRNA [NM_011309]                       | -0.25                 | 0.021   | 0.448           | -0.22                 | 0.017   | 0.857           |
| <b>Gm2662</b>                                            | XM_001474583               | ref PREDICTED: Mus musculus hypothetical protein LOC100040206 (LOC100040206), mRNA [XM_001474583] | -0.92                 | 0.021   | 0.450           | -1.08                 | 0.006   | 0.650           |
| <b>Ccdc153</b>                                           | NM_001081369               | ref Mus musculus coiled-coil domain containing 153 (Ccdc153), mRNA [NM_001081369]                 | -0.49                 | 0.022   | 0.450           | -0.47                 | 0.000   | 0.101           |
| <b>chr7:4827340-4863315_R</b>                            | chr7:4827340-4863315_R     | lincRNA:chr7:4827340-4863315 reverse strand                                                       | -0.35                 | 0.022   | 0.450           | -0.29                 | 0.048   | 1.000           |

| Online Supplemental Table IV: mG4H-Veh and mG4H-STZ Both |                            |                                                                                                                                                                                                                                      |                       |         |                 |                       |         |                 |
|----------------------------------------------------------|----------------------------|--------------------------------------------------------------------------------------------------------------------------------------------------------------------------------------------------------------------------------------|-----------------------|---------|-----------------|-----------------------|---------|-----------------|
| Gene Symbol                                              | RefSeq                     | Description                                                                                                                                                                                                                          | logFC<br>mG4H-<br>STZ | P-value | Adj.<br>P-value | logFC<br>mG4H-<br>Veh | P-value | Adj.<br>P-value |
| Gstm2                                                    | NM_008183                  | ref Mus musculus glutathione S-transferase, mu 2 (Gstm2), mRNA [NM_008183]                                                                                                                                                           | -0.36                 | 0.022   | 0.450           | -0.66                 | 0.000   | 0.009           |
| 2810454L23Rik                                            | AK013346                   | gb Mus musculus 10, 11 days embryo whole body cDNA, RIKEN full-length enriched library, clone:2810454L23 product:weakly similar to KINETOPLAST MITOCHONDRIAL MURF2 PROTEIN [Leishmania tarentolae], full insert sequence. [AK013346] | -0.32                 | 0.022   | 0.451           | -0.22                 | 0.037   | 1.000           |
| Tmsb10                                                   | NM_001190327               | ref Mus musculus thymosin, beta 10 (Tmsb10), mRNA [NM_001190327]                                                                                                                                                                     | -0.63                 | 0.022   | 0.453           | -0.22                 | 0.016   | 0.851           |
| chr6:127588224-127609749_R                               | chr6:127588224-127609749_R | lincRNA:chr6:127588224-127609749 reverse strand                                                                                                                                                                                      | -0.36                 | 0.023   | 0.453           | -0.30                 | 0.011   | 0.772           |
| chr8:91471819-91551119_R                                 | chr8:91471819-91551119_R   | lincRNA:chr8:91471819-91551119 reverse strand                                                                                                                                                                                        | -0.47                 | 0.023   | 0.454           | -0.50                 | 0.044   | 1.000           |
| chr16:21247571-21296945_R                                | chr16:21247571-21296945_R  | lincRNA:chr16:21247571-21296945 reverse strand                                                                                                                                                                                       | -0.43                 | 0.023   | 0.456           | -0.36                 | 0.023   | 0.936           |
| chr7:67111261-67120645_F                                 | chr7:67111261-67120645_F   | lincRNA:chr7:67111261-67120645 forward strand                                                                                                                                                                                        | -0.65                 | 0.024   | 0.458           | -0.38                 | 0.040   | 1.000           |
| ENSMUST00000064410                                       | ENSMUST00000064410         | ens carbohydrate sulfotransferase 10 Gene [Source:MGI Symbol;Acc:MGI:2138283] [ENSMUST00000064410]                                                                                                                                   | -0.55                 | 0.024   | 0.458           | -0.38                 | 0.007   | 0.672           |
| chr1:72983462-72987115_F                                 | chr1:72983462-72987115_F   | lincRNA:chr1:72983462-72987115 forward strand                                                                                                                                                                                        | -0.27                 | 0.024   | 0.459           | -0.28                 | 0.011   | 0.773           |
| Ehd2                                                     | ENSMUST00000098799         | ens EH-domain containing 2 Gene [Source:MGI (curated);Acc:MGI:2154274] [ENSMUST00000098799]                                                                                                                                          | -0.23                 | 0.025   | 0.463           | -0.18                 | 0.033   | 1.000           |
| Gm10639                                                  | NM_001122660               | ref Mus musculus predicted gene 10639 (Gm10639), mRNA [NM_001122660]                                                                                                                                                                 | -0.44                 | 0.026   | 0.468           | -0.51                 | 0.023   | 0.948           |
| chr13:98038568-98068079_R                                | chr13:98038568-98068079_R  | lincRNA:chr13:98038568-98068079 reverse strand                                                                                                                                                                                       | -0.79                 | 0.026   | 0.468           | -0.30                 | 0.030   | 0.998           |
| Dock1                                                    | NM_001033420               | ref Mus musculus dedicator of cytokinesis 1 (Dock1), mRNA [NM_001033420]                                                                                                                                                             | -0.25                 | 0.026   | 0.470           | -0.14                 | 0.037   | 1.000           |
| Gm8384                                                   | XM_001473438               | ref PREDICTED: Mus musculus similar to ALY (LOC627530), mRNA [XM_001473438]                                                                                                                                                          | -0.42                 | 0.026   | 0.471           | -0.57                 | 0.006   | 0.643           |

| Online Supplemental Table IV: mG4H-Veh and mG4H-STZ Both |                           |                                                                                                      |                       |         |                 |                       |         |                 |
|----------------------------------------------------------|---------------------------|------------------------------------------------------------------------------------------------------|-----------------------|---------|-----------------|-----------------------|---------|-----------------|
| Gene Symbol                                              | RefSeq                    | Description                                                                                          | logFC<br>mG4H-<br>STZ | P-value | Adj.<br>P-value | logFC<br>mG4H-<br>Veh | P-value | Adj.<br>P-value |
| chr14:43929100-43945100_R                                | chr14:43929100-43945100_R | lincRNA:chr14:43929100-43945100 reverse strand                                                       | -0.50                 | 0.027   | 0.471           | -0.55                 | 0.016   | 0.851           |
| 4930506M07Rik                                            | NM_175172                 | ref  Mus musculus RIKEN cDNA 4930506M07 gene (4930506M07Rik), transcript variant 2, mRNA [NM_175172] | -0.33                 | 0.027   | 0.472           | -0.31                 | 0.006   | 0.648           |
| Man1c1                                                   | NM_207237                 | ref  Mus musculus mannosidase, alpha, class 1C, member 1 (Man1c1), mRNA [NM_207237]                  | -0.36                 | 0.027   | 0.472           | -0.22                 | 0.039   | 1.000           |
| LOC100045690                                             | XM_001474757              | ref  PREDICTED: Mus musculus hypothetical protein LOC100045690 (LOC100045690), mRNA [XM_001474757]   | -0.70                 | 0.027   | 0.473           | -0.51                 | 0.039   | 1.000           |
| chr12:88154776-88184372_F                                | chr12:88154776-88184372_F | lincRNA:chr12:88154776-88184372 forward strand                                                       | -0.85                 | 0.028   | 0.474           | -0.61                 | 0.025   | 0.968           |
| chr5:92548501-92566401_R                                 | chr5:92548501-92566401_R  | lincRNA:chr5:92548501-92566401 reverse strand                                                        | -0.49                 | 0.028   | 0.474           | -0.67                 | 0.017   | 0.854           |
| Gm3002                                                   | NR_033388                 | ref  Mus musculus predicted gene 3002 (Gm3002), non-coding RNA [NR_033388]                           | -0.34                 | 0.029   | 0.477           | -0.30                 | 0.050   | 1.000           |
| Gm5985                                                   | XM_001475858              | ref  PREDICTED: Mus musculus predicted gene, EG546855 (EG546855), mRNA [XM_001475858]                | -0.59                 | 0.030   | 0.477           | -0.76                 | 0.010   | 0.764           |
| 4833441D16Rik                                            | BP770359                  | gb  BP770359 mouse (C57BL [BP770359]                                                                 | -0.37                 | 0.030   | 0.477           | -0.39                 | 0.001   | 0.274           |
| Ccl21b                                                   | NM_011335                 | ref  Mus musculus chemokine (C-C motif) ligand 21B (Ccl21b), mRNA [NM_011335]                        | -0.47                 | 0.030   | 0.480           | -0.39                 | 0.029   | 0.991           |
| chr8:27129927-27137444_F                                 | chr8:27129927-27137444_F  | lincRNA:chr8:27129927-27137444 forward strand                                                        | -0.29                 | 0.031   | 0.481           | -0.37                 | 0.042   | 1.000           |
| Il13                                                     | NM_008355                 | ref  Mus musculus interleukin 13 (Il13), mRNA [NM_008355]                                            | -0.82                 | 0.031   | 0.481           | -0.69                 | 0.022   | 0.922           |
| Vav3                                                     | NM_020505                 | ref  Mus musculus vav 3 oncogene (Vav3), transcript variant 1, mRNA [NM_020505]                      | -0.27                 | 0.031   | 0.482           | -0.22                 | 0.047   | 1.000           |
| chr7:48794017-48815817_R                                 | chr7:48794017-48815817_R  | lincRNA:chr7:48794017-48815817 reverse strand                                                        | -0.44                 | 0.031   | 0.483           | -0.35                 | 0.039   | 1.000           |
| Duoxa2                                                   | NM_025777                 | ref  Mus musculus dual oxidase maturation factor 2 (Duoxa2), mRNA [NM_025777]                        | -0.68                 | 0.032   | 0.485           | -0.63                 | 0.028   | 0.983           |

| Online Supplemental Table IV: mG4H-Veh and mG4H-STZ Both |                            |                                                                                                                             |                       |         |                 |                       |         |                 |
|----------------------------------------------------------|----------------------------|-----------------------------------------------------------------------------------------------------------------------------|-----------------------|---------|-----------------|-----------------------|---------|-----------------|
| Gene Symbol                                              | RefSeq                     | Description                                                                                                                 | logFC<br>mG4H-<br>STZ | P-value | Adj.<br>P-value | logFC<br>mG4H-<br>Veh | P-value | Adj.<br>P-value |
| LOC100048142                                             | XM_001479830               | ref PREDICTED: Mus musculus similar to thymosin, beta 10 (LOC100048142), mRNA [XM_001479830]                                | -0.65                 | 0.033   | 0.488           | -0.26                 | 0.032   | 1.000           |
| LOC676051                                                | XR_033788                  | ref PREDICTED: Mus musculus similar to adaptor-related protein complex 1, sigma 3 subunit (LOC676051), misc RNA [XR_033788] | -0.33                 | 0.033   | 0.490           | -0.41                 | 0.007   | 0.664           |
| Lig3                                                     | NM_010716                  | ref Mus musculus ligase III, DNA, ATP-dependent (Lig3), nuclear gene encoding mitochondrial protein, mRNA [NM_010716]       | -0.23                 | 0.033   | 0.490           | -0.16                 | 0.048   | 1.000           |
| E030030I06Rik                                            | ENSMUST00000069372         | ens RIKEN cDNA E030030I06 gene Gene [Source:MGI Symbol;Acc:MGI:2442914] [ENSMUST00000069372]                                | -0.31                 | 0.035   | 0.493           | -0.40                 | 0.005   | 0.588           |
| chr1:167797581-167803031_F                               | chr1:167797581-167803031_F | lincRNA:chr1:167797581-167803031 forward strand                                                                             | -0.47                 | 0.035   | 0.495           | -0.40                 | 0.030   | 0.998           |
| Olfr701                                                  | NM_028910                  | ref Mus musculus olfactory receptor 701 (Olfr701), mRNA [NM_028910]                                                         | -0.54                 | 0.035   | 0.495           | -0.40                 | 0.023   | 0.941           |
| chr17:95255725-95272425_F                                | chr17:95255725-95272425_F  | lincRNA:chr17:95255725-95272425 forward strand                                                                              | -0.40                 | 0.036   | 0.495           | -0.39                 | 0.027   | 0.975           |
| chr13:60508775-60534625_F                                | chr13:60508775-60534625_F  | lincRNA:chr13:60508775-60534625 forward strand                                                                              | -0.64                 | 0.036   | 0.495           | -0.62                 | 0.019   | 0.883           |
| Sypl2                                                    | NM_008596                  | ref Mus musculus synaptophysin-like 2 (Sypl2), mRNA [NM_008596]                                                             | -0.51                 | 0.036   | 0.495           | -0.52                 | 0.039   | 1.000           |
| E2f8                                                     | NM_001013368               | ref Mus musculus E2F transcription factor 8 (E2f8), mRNA [NM_001013368]                                                     | -0.33                 | 0.037   | 0.496           | -0.45                 | 0.002   | 0.377           |
| Tmem205                                                  | NM_178577                  | ref Mus musculus transmembrane protein 205 (Tmem205), mRNA [NM_178577]                                                      | -0.31                 | 0.037   | 0.497           | -0.30                 | 0.025   | 0.966           |
| chr3:96205368-96217943_F                                 | chr3:96205368-96217943_F   | lincRNA:chr3:96205368-96217943 forward strand                                                                               | -0.53                 | 0.037   | 0.498           | -0.68                 | 0.018   | 0.864           |
| chr2:31001736-31006911_F                                 | chr2:31001736-31006911_F   | lincRNA:chr2:31001736-31006911 forward strand                                                                               | -0.35                 | 0.038   | 0.499           | -0.40                 | 0.024   | 0.957           |
| chr6:47692090-47713542_F                                 | chr6:47692090-47713542_F   | lincRNA:chr6:47692090-47713542 forward strand                                                                               | -0.29                 | 0.039   | 0.499           | -0.30                 | 0.011   | 0.766           |
| chr8:110196655-110390197_F                               | chr8:110196655-110390197_F | lincRNA:chr8:110196655-110390197 forward strand                                                                             | -0.42                 | 0.039   | 0.500           | -0.49                 | 0.043   | 1.000           |



Online Supplemental Table IV: mG4H-Veh and mG4H-STZ Both

| Gene Symbol                       | RefSeq                     | Description                                                                                                                                                    | logFC<br>mG4H-<br>STZ | P-value | Adj.<br>P-value | logFC<br>mG4H-<br>Veh | P-value | Adj.<br>P-value |
|-----------------------------------|----------------------------|----------------------------------------------------------------------------------------------------------------------------------------------------------------|-----------------------|---------|-----------------|-----------------------|---------|-----------------|
| <b>9630017O17</b>                 | AK035916                   | gb Mus musculus 16 days neonate cerebellum cDNA, RIKEN full-length enriched library, clone:9630017O17 product:unclassifiable, full insert sequence. [AK035916] | -0.40                 | 0.039   | 0.500           | -0.27                 | 0.030   | 0.998           |
| <b>Ctsl3</b>                      | NM_027344                  | ref Mus musculus cathepsin L-like 3 (Ctsl3), mRNA [NM_027344]                                                                                                  | -0.49                 | 0.040   | 0.502           | -0.63                 | 0.004   | 0.567           |
| <b>Smok4a</b>                     | NR_030763                  | ref Mus musculus sperm motility kinase 4A (Smok4a), non-coding RNA [NR_030763]                                                                                 | -0.37                 | 0.040   | 0.504           | -0.47                 | 0.038   | 1.000           |
| <b>4930452L12Rik</b>              | BY714998                   | gb BY714998 RIKEN full-length enriched, adult male testis Mus musculus cDNA clone 4930452L12 5'. [BY714998]                                                    | -0.37                 | 0.042   | 0.507           | -0.54                 | 0.037   | 1.000           |
| <b>Bex1</b>                       | NM_009052                  | ref Mus musculus brain expressed gene 1 (Bex1), mRNA [NM_009052]                                                                                               | -0.72                 | 0.043   | 0.511           | -0.77                 | 0.000   | 0.131           |
| <b>Sstr1</b>                      | NM_009216                  | ref Mus musculus somatostatin receptor 1 (Sstr1), mRNA [NM_009216]                                                                                             | -0.33                 | 0.043   | 0.511           | -0.35                 | 0.026   | 0.972           |
| <b>LOC637477</b>                  | XM_001476893               | ref PREDICTED: Mus musculus hypothetical LOC637477 (LOC637477), mRNA [XM_001476893]                                                                            | -0.48                 | 0.044   | 0.511           | -0.61                 | 0.017   | 0.854           |
| <b>chr1:167218236-167218418_F</b> | chr1:167218236-167218418_F | lincRNA:chr1:167218236-167218418 forward strand                                                                                                                | -0.32                 | 0.044   | 0.511           | -0.30                 | 0.043   | 1.000           |
| <b>ENSMUST00000097955</b>         | ENSMUST00000097955         | ens cache domain containing 1 Gene [Source:MGI (curated);Acc:MGI:2444177] [ENSMUST00000097955]                                                                 | -0.27                 | 0.044   | 0.512           | -0.37                 | 0.032   | 1.000           |
| <b>chr17:26613904-26614277_F</b>  | chr17:26613904-26614277_F  | lincRNA:chr17:26613904-26614277 forward strand                                                                                                                 | -0.44                 | 0.044   | 0.512           | -0.55                 | 0.044   | 1.000           |
| <b>Adhfe1</b>                     | NM_175236                  | ref Mus musculus alcohol dehydrogenase, iron containing, 1 (Adhfe1), nuclear gene encoding mitochondrial protein, transcript variant 1, mRNA [NM_175236]       | -0.30                 | 0.045   | 0.513           | -0.39                 | 0.002   | 0.384           |
| <b>ENSMUST00000110689</b>         | ENSMUST00000110689         | Unknown                                                                                                                                                        | -0.28                 | 0.046   | 0.513           | -0.51                 | 0.001   | 0.317           |
| <b>G630022F23Rik</b>              | AK144327                   | gb Mus musculus 0 day neonate cortex cDNA, RIKEN full-length enriched library, clone:G630022F23 product:hypothetical protein, full insert sequence. [AK144327] | -0.47                 | 0.046   | 0.513           | -0.36                 | 0.049   | 1.000           |

| Online Supplemental Table IV: mG4H-Veh and mG4H-STZ Both |                            |                                                                                                    |                       |         |                 |                       |         |                 |
|----------------------------------------------------------|----------------------------|----------------------------------------------------------------------------------------------------|-----------------------|---------|-----------------|-----------------------|---------|-----------------|
| Gene Symbol                                              | RefSeq                     | Description                                                                                        | logFC<br>mG4H-<br>STZ | P-value | Adj.<br>P-value | logFC<br>mG4H-<br>Veh | P-value | Adj.<br>P-value |
| chr1:115829055-115854155_F                               | chr1:115829055-115854155_F | lincRNA:chr1:115829055-115854155 forward strand                                                    | -0.49                 | 0.046   | 0.513           | -0.52                 | 0.021   | 0.916           |
| Slc34a1                                                  | NM_011392                  | ref Mus musculus solute carrier family 34 (sodium phosphate), member 1 (Slc34a1), mRNA [NM_011392] | -0.39                 | 0.046   | 0.513           | -0.41                 | 0.009   | 0.730           |
| chr7:99879368-99889978_F                                 | chr7:99879368-99889978_F   | lincRNA:chr7:99879368-99889978 forward strand                                                      | -0.59                 | 0.047   | 0.515           | -0.47                 | 0.040   | 1.000           |
| LOC100045610                                             | XM_001474598               | ref PREDICTED: Mus musculus hypothetical protein LOC100045610 (LOC100045610), mRNA [XM_001474598]  | -0.34                 | 0.047   | 0.515           | -0.28                 | 0.009   | 0.720           |
| Fads6                                                    | NM_178035                  | ref Mus musculus fatty acid desaturase domain family, member 6 (Fads6), mRNA [NM_178035]           | -0.28                 | 0.048   | 0.516           | -0.24                 | 0.011   | 0.766           |

| Online Supplemental Table IV: mG4H-Veh and Con-STZ Both |                            |                                                                                                   |                       |         |                 |                      |         |                 |
|---------------------------------------------------------|----------------------------|---------------------------------------------------------------------------------------------------|-----------------------|---------|-----------------|----------------------|---------|-----------------|
| Gene Symbol                                             | RefSeq                     | Description                                                                                       | logFC<br>mG4H-<br>Veh | P-value | Adj.<br>P-value | logFC<br>Con-<br>STZ | P-value | Adj.<br>P-value |
| <b>Epyc</b>                                             | NM_007884                  | ref Mus musculus epiphykan (Epyc), mRNA [NM_007884]                                               | 0.90                  | 0.036   | 1.000           | 0.43                 | 0.041   | 0.422           |
| <b>Sfrp5</b>                                            | NM_018780                  | ref Mus musculus secreted frizzled-related sequence protein 5 (Sfrp5), mRNA [NM_018780]           | 0.84                  | 0.002   | 0.357           | 0.37                 | 0.020   | 0.298           |
| <b>chr16:13752215-13764390_R</b>                        | chr16:13752215-13764390_R  | lincRNA:chr16:13752215-13764390 reverse strand                                                    | 0.84                  | 0.001   | 0.272           | 0.52                 | 0.027   | 0.344           |
| <b>ENSMUST00000099100</b>                               | ENSMUST00000099100         | ens Putative uncharacterized protein [Source:UniProtKB/TrEMBL;Acc:Q3V179] [ENSMUST00000099100]    | 0.83                  | 0.007   | 0.664           | 0.68                 | 0.015   | 0.263           |
| <b>chr8:72178035-72200445_R</b>                         | chr8:72178035-72200445_R   | lincRNA:chr8:72178035-72200445 reverse strand                                                     | 0.83                  | 0.005   | 0.606           | 0.69                 | 0.026   | 0.338           |
| <b>Vmn1r32</b>                                          | NM_134170                  | ref Mus musculus vomeronasal 1 receptor 32 (Vmn1r32), mRNA [NM_134170]                            | 0.77                  | 0.043   | 1.000           | 0.75                 | 0.031   | 0.368           |
| <b>Ccl8</b>                                             | NM_021443                  | ref Mus musculus chemokine (C-C motif) ligand 8 (Ccl8), mRNA [NM_021443]                          | 0.66                  | 0.023   | 0.935           | 1.50                 | 0.025   | 0.330           |
| <b>Zfp287</b>                                           | NM_133208                  | ref Mus musculus zinc finger protein 287 (Zfp287), mRNA [NM_133208]                               | 0.64                  | 0.041   | 1.000           | 0.83                 | 0.018   | 0.280           |
| <b>Gfi1</b>                                             | NM_010278                  | ref Mus musculus growth factor independent 1 (Gfi1), mRNA [NM_010278]                             | 0.63                  | 0.008   | 0.708           | 0.50                 | 0.015   | 0.261           |
| <b>chr4:89048647-89066563_F</b>                         | chr4:89048647-89066563_F   | lincRNA:chr4:89048647-89066563 forward strand                                                     | 0.61                  | 0.014   | 0.812           | 0.69                 | 0.010   | 0.208           |
| <b>Ifne</b>                                             | NM_177348                  | ref Mus musculus interferon epsilon (Ifne), mRNA [NM_177348]                                      | 0.61                  | 0.015   | 0.826           | 0.67                 | 0.001   | 0.075           |
| <b>Lhx5</b>                                             | NM_008499                  | ref Mus musculus LIM homeobox protein 5 (Lhx5), mRNA [NM_008499]                                  | 0.59                  | 0.027   | 0.983           | 0.50                 | 0.028   | 0.352           |
| <b>chr8:126278269-126291621_F</b>                       | chr8:126278269-126291621_F | lincRNA:chr8:126278269-126291621 forward strand                                                   | 0.59                  | 0.006   | 0.624           | 0.46                 | 0.047   | 0.446           |
| <b>Gal3st4</b>                                          | NM_001033416               | ref Mus musculus galactose-3-O-sulfotransferase 4 (Gal3st4), mRNA [NM_001033416]                  | 0.57                  | 0.000   | 0.119           | 0.39                 | 0.005   | 0.154           |
| <b>Gm2043</b>                                           | XM_001472249               | ref PREDICTED: Mus musculus hypothetical protein LOC100039094 (LOC100039094), mRNA [XM_001472249] | 0.55                  | 0.047   | 1.000           | 0.79                 | 0.031   | 0.370           |

| Online Supplemental Table IV: mG4H-Veh and Con-STZ Both |                             |                                                                                                              |                       |         |                 |                      |         |                 |
|---------------------------------------------------------|-----------------------------|--------------------------------------------------------------------------------------------------------------|-----------------------|---------|-----------------|----------------------|---------|-----------------|
| Gene Symbol                                             | RefSeq                      | Description                                                                                                  | logFC<br>mG4H-<br>Veh | P-value | Adj.<br>P-value | logFC<br>Con-<br>STZ | P-value | Adj.<br>P-value |
| chr14:100858641-100878744_F                             | chr14:100858641-100878744_F | lincRNA:chr14:100858641-100878744 forward strand                                                             | 0.54                  | 0.019   | 0.881           | 0.49                 | 0.048   | 0.451           |
| Prss21                                                  | NM_020487                   | ref  Mus musculus protease, serine, 21 (Prss21), mRNA [NM_020487]                                            | 0.53                  | 0.026   | 0.971           | 0.34                 | 0.046   | 0.443           |
| Gm2170                                                  | XM_001472717                | ref  PREDICTED: Mus musculus hypothetical protein LOC100039341 (LOC100039341), mRNA [XM_001472717]           | 0.52                  | 0.017   | 0.855           | 0.48                 | 0.018   | 0.283           |
| Caskin1                                                 | NM_027937                   | ref  Mus musculus CASK interacting protein 1 (Caskin1), mRNA [NM_027937]                                     | 0.52                  | 0.041   | 1.000           | 0.56                 | 0.014   | 0.252           |
| LOC100048500                                            | XM_001480545                | ref  PREDICTED: Mus musculus hypothetical protein LOC100048500 (LOC100048500), mRNA [XM_001480545]           | 0.51                  | 0.029   | 0.989           | 0.52                 | 0.036   | 0.393           |
| Ccl2                                                    | NM_011333                   | ref  Mus musculus chemokine (C-C motif) ligand 2 (Ccl2), mRNA [NM_011333]                                    | 0.51                  | 0.020   | 0.895           | 1.11                 | 0.016   | 0.274           |
| chr6:86477309-86537554_F                                | chr6:86477309-86537554_F    | lincRNA:chr6:86477309-86537554 forward strand                                                                | 0.50                  | 0.017   | 0.858           | 0.47                 | 0.023   | 0.316           |
| Art2a-ps                                                | NM_007490                   | ref  Mus musculus ADP-ribosyltransferase 2a, pseudogene (Art2a-ps), transcript variant 1, mRNA [NM_007490]   | 0.50                  | 0.047   | 1.000           | 0.50                 | 0.046   | 0.445           |
| Rnase9                                                  | NM_183032                   | ref  Mus musculus ribonuclease, RNase A family, 9 (non-active) (Rnase9), mRNA [NM_183032]                    | 0.49                  | 0.036   | 1.000           | 0.46                 | 0.026   | 0.337           |
| 4930404H11Rik                                           | BY714608                    | gb  BY714608 RIKEN full-length enriched, adult male testis Mus musculus cDNA clone 4930404H11 5'. [BY714608] | 0.47                  | 0.024   | 0.952           | 0.51                 | 0.023   | 0.320           |
| chr15:41486232-41499767_R                               | chr15:41486232-41499767_R   | lincRNA:chr15:41486232-41499767 reverse strand                                                               | 0.47                  | 0.032   | 1.000           | 0.37                 | 0.047   | 0.449           |
| chr9:78368697-78369095_R                                | chr9:78368697-78369095_R    | lincRNA:chr9:78368697-78369095 reverse strand                                                                | 0.47                  | 0.032   | 1.000           | 0.43                 | 0.046   | 0.443           |
| LOC100044408                                            | XM_001472202                | ref  PREDICTED: Mus musculus similar to candidate taste receptor mt2r58 (LOC100044408), mRNA [XM_001472202]  | 0.46                  | 0.033   | 1.000           | 0.44                 | 0.026   | 0.341           |

| Online Supplemental Table IV: mG4H-Veh and Con-STZ Both |                            |                                                                                                                    |                       |         |                 |                      |         |                 |
|---------------------------------------------------------|----------------------------|--------------------------------------------------------------------------------------------------------------------|-----------------------|---------|-----------------|----------------------|---------|-----------------|
| Gene Symbol                                             | RefSeq                     | Description                                                                                                        | logFC<br>mG4H-<br>Veh | P-value | Adj.<br>P-value | logFC<br>Con-<br>STZ | P-value | Adj.<br>P-value |
| Enpp6                                                   | NM_177304                  | ref Mus musculus ectonucleotide pyrophosphatase/phosphodiesterase 6 (Enpp6), mRNA [NM_177304]                      | 0.46                  | 0.016   | 0.851           | 0.39                 | 0.007   | 0.179           |
| chr7:140012053-140012509_R                              | chr7:140012053-140012509_R | lincRNA:chr7:140012053-140012509 reverse strand                                                                    | 0.45                  | 0.012   | 0.783           | 0.44                 | 0.014   | 0.257           |
| ENSMUST00000063230                                      | ENSMUST00000063230         | ens RIKEN cDNA 4930544M13 gene Gene [Source:MGI Symbol;Acc:MGI:1922411] [ENSMUST00000063230]                       | 0.45                  | 0.008   | 0.705           | 0.47                 | 0.018   | 0.287           |
| LOC100047422                                            | XM_001478117               | ref PREDICTED: Mus musculus similar to RIKEN cDNA 3110050K21 (LOC100047422), mRNA [XM_001478117]                   | 0.44                  | 0.001   | 0.285           | 0.28                 | 0.019   | 0.294           |
| Gm3750                                                  | NM_001099643               | ref Mus musculus predicted gene 3750 (Gm3750), mRNA [NM_001099643]                                                 | 0.44                  | 0.041   | 1.000           | 0.44                 | 0.046   | 0.443           |
| XM_001476966                                            | XM_001476966               | ref PREDICTED: Mus musculus similar to sterile alpha motif domain containing 1 (LOC100041764), mRNA [XM_001476966] | 0.44                  | 0.020   | 0.895           | 0.72                 | 0.004   | 0.132           |
| chr8:12278818-12280657_F                                | chr8:12278818-12280657_F   | lincRNA:chr8:12278818-12280657 forward strand                                                                      | 0.42                  | 0.017   | 0.861           | 0.42                 | 0.021   | 0.307           |
| chrX:6982891-7008528_R                                  | chrX:6982891-7008528_R     | lincRNA:chrX:6982891-7008528 reverse strand                                                                        | 0.42                  | 0.011   | 0.773           | 0.35                 | 0.045   | 0.440           |
| Gm5126                                                  | NR_026596                  | ref Mus musculus predicted pseudogene 5126 (Gm5126), non-coding RNA [NR_026596]                                    | 0.41                  | 0.041   | 1.000           | 0.31                 | 0.028   | 0.350           |
| Dok7                                                    | NM_172708                  | ref Mus musculus docking protein 7 (Dok7), mRNA [NM_172708]                                                        | 0.40                  | 0.010   | 0.762           | 0.33                 | 0.016   | 0.269           |
| Bcat1                                                   | NM_007532                  | ref Mus musculus branched chain aminotransferase 1, cytosolic (Bcat1), transcript variant 2, mRNA [NM_007532]      | 0.39                  | 0.008   | 0.694           | 0.37                 | 0.013   | 0.241           |
| chr15:73455424-73477275_R                               | chr15:73455424-73477275_R  | lincRNA:chr15:73455424-73477275 reverse strand                                                                     | 0.39                  | 0.003   | 0.503           | 0.37                 | 0.004   | 0.137           |
| Gm2654                                                  | XR_031664                  | ref PREDICTED: Mus musculus similar to mKIAA1897 protein (LOC100040190), misc RNA [XR_031664]                      | 0.38                  | 0.026   | 0.970           | 0.23                 | 0.017   | 0.280           |
| Amd2                                                    | NM_007444                  | ref Mus musculus S-adenosylmethionine decarboxylase 2 (Amd2), mRNA [NM_007444]                                     | 0.38                  | 0.005   | 0.589           | 0.41                 | 0.006   | 0.156           |

| Online Supplemental Table IV: mG4H-Veh and Con-STZ Both |                           |                                                                                                                                                                                         |                       |         |                 |                      |         |                 |
|---------------------------------------------------------|---------------------------|-----------------------------------------------------------------------------------------------------------------------------------------------------------------------------------------|-----------------------|---------|-----------------|----------------------|---------|-----------------|
| Gene Symbol                                             | RefSeq                    | Description                                                                                                                                                                             | logFC<br>mG4H-<br>Veh | P-value | Adj.<br>P-value | logFC<br>Con-<br>STZ | P-value | Adj.<br>P-value |
| <b>Atf2</b>                                             | NM_001025093              | ref Mus musculus activating transcription factor 2 (Atf2), transcript variant 1, mRNA [NM_001025093]                                                                                    | 0.37                  | 0.050   | 1.000           | 0.57                 | 0.018   | 0.281           |
| <b>chr12:88154776-88184372_F</b>                        | chr12:88154776-88184372_F | lincRNA:chr12:88154776-88184372 forward strand                                                                                                                                          | 0.37                  | 0.020   | 0.897           | 0.43                 | 0.011   | 0.227           |
| <b>Cdkn2b</b>                                           | NM_007670                 | ref Mus musculus cyclin-dependent kinase inhibitor 2B (p15, inhibits CDK4) (Cdkn2b), mRNA [NM_007670]                                                                                   | 0.37                  | 0.006   | 0.661           | 0.30                 | 0.024   | 0.325           |
| <b>Gm6225</b>                                           | NR_033457                 | ref Mus musculus predicted gene 6225 (Gm6225), non-coding RNA [NR_033457]                                                                                                               | 0.37                  | 0.001   | 0.245           | 0.32                 | 0.010   | 0.208           |
| <b>LOC100044768</b>                                     | XM_001473012              | ref PREDICTED: Mus musculus hypothetical protein LOC100044768 (LOC100044768), mRNA [XM_001473012]                                                                                       | 0.37                  | 0.015   | 0.833           | 0.44                 | 0.033   | 0.376           |
| <b>Stk35</b>                                            | NM_183262                 | ref Mus musculus serine/threonine kinase 35 (Stk35), transcript variant 1, mRNA [NM_183262]                                                                                             | 0.36                  | 0.017   | 0.862           | 0.51                 | 0.002   | 0.081           |
| <b>Otor</b>                                             | NM_020595                 | ref Mus musculus otoraplin (Otor), mRNA [NM_020595]                                                                                                                                     | 0.35                  | 0.019   | 0.881           | 0.38                 | 0.043   | 0.428           |
| <b>Slc25a22</b>                                         | NM_026646                 | ref Mus musculus solute carrier family 25 (mitochondrial carrier, glutamate), member 22 (Slc25a22), nuclear gene encoding mitochondrial protein, transcript variant 1, mRNA [NM_026646] | 0.35                  | 0.014   | 0.825           | 0.33                 | 0.011   | 0.226           |
| <b>chr13:64018565-64082570_F</b>                        | chr13:64018565-64082570_F | lincRNA:chr13:64018565-64082570 forward strand                                                                                                                                          | 0.35                  | 0.019   | 0.881           | 0.39                 | 0.011   | 0.227           |
| <b>Dhh</b>                                              | NM_007857                 | ref Mus musculus desert hedgehog (Dhh), mRNA [NM_007857]                                                                                                                                | 0.35                  | 0.044   | 1.000           | 0.43                 | 0.009   | 0.200           |
| <b>Gm11295</b>                                          | XR_032538                 | ref PREDICTED: Mus musculus similar to fatty acyl elongase (LOC675480), misc RNA [XR_032538]                                                                                            | 0.34                  | 0.024   | 0.957           | 0.38                 | 0.010   | 0.216           |
| <b>Amd-ps6</b>                                          | XR_032961                 | ref PREDICTED: Mus musculus similar to S-adenosylmethionine decarboxylase (LOC666251), misc RNA [XR_032961]                                                                             | 0.34                  | 0.034   | 1.000           | 0.46                 | 0.039   | 0.411           |
| <b>A530020G20Rik</b>                                    | AK040960                  | gb Mus musculus adult male aorta and vein cDNA, RIKEN full-length enriched library, clone:A530051K04 product:unclassifiable, full insert sequence. [AK040960]                           | 0.34                  | 0.029   | 0.986           | 0.36                 | 0.029   | 0.356           |
| <b>Ubiad1</b>                                           | NM_027873                 | ref Mus musculus UbiA prenyltransferase domain containing 1 (Ubiad1), mRNA [NM_027873]                                                                                                  | 0.34                  | 0.001   | 0.263           | 0.20                 | 0.041   | 0.420           |



| Online Supplemental Table IV: mG4H-Veh and Con-STZ Both |                          |                                                                                                                                                                    |                       |         |                 |                      |         |                 |
|---------------------------------------------------------|--------------------------|--------------------------------------------------------------------------------------------------------------------------------------------------------------------|-----------------------|---------|-----------------|----------------------|---------|-----------------|
| Gene Symbol                                             | RefSeq                   | Description                                                                                                                                                        | logFC<br>mG4H-<br>Veh | P-value | Adj.<br>P-value | logFC<br>Con-<br>STZ | P-value | Adj.<br>P-value |
| <b>chr8:28345511-28361105_F</b>                         | chr8:28345511-28361105_F | lincRNA:chr8:28345511-28361105 forward strand                                                                                                                      | 0.33                  | 0.026   | 0.974           | 0.41                 | 0.049   | 0.452           |
| <b>LOC641137</b>                                        | XM_918476                | ref  PREDICTED: Mus musculus similar to G protein-coupled receptor, family C, group 2, member A, related sequence 5 (LOC641137), mRNA [XM_918476]                  | 0.32                  | 0.035   | 1.000           | 0.34                 | 0.039   | 0.411           |
| <b>ENSMUST00000095675</b>                               | ENSMUST00000095675       | ens a disintegrin-like and metallopeptidase (reprolysin type) with thrombospondin type 1 motif, 9 Gene [Source:MGI (curated);Acc:MGI:1916320] [ENSMUST00000095675] | 0.32                  | 0.042   | 1.000           | 0.42                 | 0.008   | 0.193           |
| <b>Fam196a</b>                                          | ENSMUST00000097984       | ens family with sequence similarity 196, member A Gene [Source:MGI Symbol;Acc:MGI:3605068] [ENSMUST00000097984]                                                    | 0.31                  | 0.007   | 0.674           | 0.34                 | 0.012   | 0.232           |
| <b>Slc30a7</b>                                          | NM_023214                | ref  Mus musculus solute carrier family 30 (zinc transporter), member 7 (Slc30a7), mRNA [NM_023214]                                                                | 0.31                  | 0.040   | 1.000           | 0.37                 | 0.029   | 0.356           |
| <b>Mmd</b>                                              | NM_026178                | ref  Mus musculus monocyte to macrophage differentiation-associated (Mmd), mRNA [NM_026178]                                                                        | 0.30                  | 0.018   | 0.863           | 0.30                 | 0.021   | 0.303           |
| <b>Sumf2</b>                                            | NM_026445                | ref Mus musculus sulfatase modifying factor 2 (Sumf2), mRNA [NM_026445]                                                                                            | 0.30                  | 0.030   | 0.998           | 0.36                 | 0.012   | 0.236           |
| <b>Gpi1</b>                                             | NM_008155                | ref Mus musculus glucose phosphate isomerase 1 (Gpi1), mRNA [NM_008155]                                                                                            | 0.29                  | 0.011   | 0.781           | 0.29                 | 0.032   | 0.374           |
| <b>chr6:47687025-47728525_F</b>                         | chr6:47687025-47728525_F | lincRNA:chr6:47687025-47728525 forward strand                                                                                                                      | 0.29                  | 0.040   | 1.000           | 0.31                 | 0.042   | 0.425           |
| <b>Csrp2</b>                                            | NM_007792                | ref  Mus musculus cysteine and glycine-rich protein 2 (Csrp2), mRNA [NM_007792]                                                                                    | 0.29                  | 0.012   | 0.793           | 0.32                 | 0.021   | 0.302           |
| <b>chr6:54592523-54593344_R</b>                         | chr6:54592523-54593344_R | lincRNA:chr6:54592523-54593344 reverse strand                                                                                                                      | 0.29                  | 0.042   | 1.000           | 0.23                 | 0.050   | 0.457           |
| <b>Dyx1c1</b>                                           | NM_026314                | ref Mus musculus dyslexia susceptibility 1 candidate 1 homolog (human) (Dyx1c1), transcript variant 1, mRNA [NM_026314]                                            | 0.28                  | 0.030   | 0.998           | 0.25                 | 0.048   | 0.452           |
| <b>Zcchc2</b>                                           | NM_001122676             | ref Mus musculus zinc finger, CCHC domain containing 2 (Zcchc2), transcript variant A, mRNA [NM_001122676]                                                         | 0.27                  | 0.050   | 1.000           | 0.31                 | 0.041   | 0.421           |

| Online Supplemental Table IV: mG4H-Veh and Con-STZ Both |                          |                                                                                                                         |                       |         |                 |                      |         |                 |
|---------------------------------------------------------|--------------------------|-------------------------------------------------------------------------------------------------------------------------|-----------------------|---------|-----------------|----------------------|---------|-----------------|
| Gene Symbol                                             | RefSeq                   | Description                                                                                                             | logFC<br>mG4H-<br>Veh | P-value | Adj.<br>P-value | logFC<br>Con-<br>STZ | P-value | Adj.<br>P-value |
| LOC625164                                               | XM_001477567             | ref PREDICTED: Mus musculus similar to novel member of the interferon zeta family Ifnz (LOC625164), mRNA [XM_001477567] | 0.27                  | 0.044   | 1.000           | 0.35                 | 0.034   | 0.384           |
| ENSMUST00000089248                                      | ENSMUST00000089248       | ref PREDICTED: Mus musculus similar to polyQ-containing protein CAG-8 (LOC100046794), mRNA [XM_001476824]               | 0.26                  | 0.027   | 0.981           | 0.32                 | 0.025   | 0.332           |
| Sulf2                                                   | NM_028072                | ref Mus musculus sulfatase 2 (Sulf2), mRNA [NM_028072]                                                                  | 0.26                  | 0.004   | 0.572           | 0.42                 | 0.003   | 0.122           |
| Tmem39a                                                 | NM_026407                | ref Mus musculus transmembrane protein 39a (Tmem39a), mRNA [NM_026407]                                                  | 0.26                  | 0.019   | 0.881           | 0.24                 | 0.041   | 0.419           |
| Pcgf2                                                   | NM_009545                | ref Mus musculus polycomb group ring finger 2 (Pcgf2), transcript variant 1, mRNA [NM_009545]                           | 0.26                  | 0.038   | 1.000           | 0.32                 | 0.035   | 0.387           |
| Skil                                                    | NM_011386                | ref Mus musculus SKI-like (Skil), transcript variant 1, mRNA [NM_011386]                                                | 0.25                  | 0.018   | 0.865           | 0.27                 | 0.018   | 0.284           |
| chr7:88131123-88136898_R                                | chr7:88131123-88136898_R | lincRNA:chr7:88131123-88136898 reverse strand                                                                           | 0.24                  | 0.005   | 0.606           | 0.21                 | 0.033   | 0.377           |
| Hmga1                                                   | NM_016660                | ref Mus musculus high mobility group AT-hook 1 (Hmga1), transcript variant 1, mRNA [NM_016660]                          | 0.22                  | 0.015   | 0.831           | 0.24                 | 0.025   | 0.330           |
| Hsd12                                                   | NM_024255                | ref Mus musculus hydroxysteroid dehydrogenase like 2 (Hsd12), mRNA [NM_024255]                                          | 0.22                  | 0.011   | 0.781           | 0.33                 | 0.004   | 0.137           |
| Abcg1                                                   | NM_009593                | ref Mus musculus ATP-binding cassette, sub-family G (WHITE), member 1 (Abcg1), mRNA [NM_009593]                         | 0.21                  | 0.039   | 1.000           | 0.42                 | 0.011   | 0.216           |
| Retsat                                                  | NM_026159                | ref Mus musculus retinol saturase (all trans retinol 13,14 reductase) (Retsat), mRNA [NM_026159]                        | 0.20                  | 0.010   | 0.758           | 0.60                 | 0.000   | 0.010           |
| Ppp1r14b                                                | NM_008889                | ref Mus musculus protein phosphatase 1, regulatory (inhibitor) subunit 14B (Ppp1r14b), mRNA [NM_008889]                 | 0.20                  | 0.018   | 0.869           | 0.28                 | 0.016   | 0.272           |
| Zdhhc3                                                  | NM_026917                | ref Mus musculus zinc finger, DHHC domain containing 3 (Zdhhc3), mRNA [NM_026917]                                       | 0.19                  | 0.043   | 1.000           | 0.20                 | 0.043   | 0.428           |
| Plin5                                                   | NM_001077348             | ref Mus musculus perilipin 5 (Plin5), transcript variant 2, mRNA [NM_001077348]                                         | 0.19                  | 0.025   | 0.965           | 0.56                 | 0.004   | 0.135           |
| Chmp4b                                                  | NM_029362                | ref Mus musculus chromatin modifying protein 4B (Chmp4b), mRNA [NM_029362]                                              | 0.16                  | 0.038   | 1.000           | 0.21                 | 0.021   | 0.302           |

| Online Supplemental Table IV: mG4H-Veh and Con-STZ Both |                            |                                                                                                                                               |                       |         |                 |                      |         |                 |
|---------------------------------------------------------|----------------------------|-----------------------------------------------------------------------------------------------------------------------------------------------|-----------------------|---------|-----------------|----------------------|---------|-----------------|
| Gene Symbol                                             | RefSeq                     | Description                                                                                                                                   | logFC<br>mG4H-<br>Veh | P-value | Adj.<br>P-value | logFC<br>Con-<br>STZ | P-value | Adj.<br>P-value |
| Lgi3                                                    | NM_145219                  | ref Mus musculus leucine-rich repeat LGI family, member 3 (Lgi3), mRNA [NM_145219]                                                            | 1.17                  | 0.000   | 0.004           | -0.67                | 0.000   | 0.012           |
| Aldob                                                   | NM_144903                  | ref Mus musculus aldolase B, fructose-bisphosphate (Aldob), mRNA [NM_144903]                                                                  | 0.68                  | 0.007   | 0.679           | -1.02                | 0.002   | 0.095           |
| Gsg1l                                                   | NM_001101488               | ref Mus musculus GSG1-like (Gsg1l), mRNA [NM_001101488]                                                                                       | 0.65                  | 0.000   | 0.022           | -0.69                | 0.000   | 0.043           |
| Ralgapa2                                                | NM_001033348               | ref Mus musculus Ral GTPase activating protein, alpha subunit 2 (catalytic) (Ralgapa2), mRNA [NM_001033348]                                   | 0.62                  | 0.000   | 0.012           | -0.32                | 0.006   | 0.166           |
| Gsg1l                                                   | NM_001101488               | ref Mus musculus GSG1-like (Gsg1l), mRNA [NM_001101488]                                                                                       | 0.52                  | 0.010   | 0.746           | -0.59                | 0.003   | 0.118           |
| Mas1                                                    | NM_008552                  | ref Mus musculus MAS1 oncogene (Mas1), mRNA [NM_008552]                                                                                       | 0.51                  | 0.003   | 0.469           | -0.53                | 0.017   | 0.278           |
| 2310015K22Rik                                           | XM_001473304               | ref PREDICTED: Mus musculus RIKEN cDNA 2310015K22 gene (2310015K22Rik), mRNA [XM_001473304]                                                   | 0.50                  | 0.003   | 0.503           | -0.33                | 0.026   | 0.335           |
| Ybx2                                                    | ENSMUST00000018698         | ens Y box protein 2 Gene [Source:MGI (curated);Acc:MGI:1096372] [ENSMUST00000018698]                                                          | 0.50                  | 0.001   | 0.316           | -0.78                | 0.000   | 0.021           |
| March11                                                 | NM_177597                  | ref Mus musculus membrane-associated ring finger (C3HC4) 11 (March11), mRNA [NM_177597]                                                       | 0.47                  | 0.005   | 0.602           | -0.62                | 0.035   | 0.390           |
| chr2:136340642-136341256_F                              | chr2:136340642-136341256_F | lincRNA:chr2:136340642-136341256 forward strand                                                                                               | 0.43                  | 0.033   | 1.000           | -0.78                | 0.031   | 0.370           |
| AI852064                                                | BC058714                   | gb Mus musculus cDNA clone IMAGE:6842867, partial cds. [BC058714]                                                                             | 0.42                  | 0.001   | 0.251           | -0.29                | 0.046   | 0.444           |
| Mid1ip1                                                 | NM_001166635               | ref Mus musculus Mid1 interacting protein 1 (gastrulation specific G12-like (zebrafish)) (Mid1ip1), transcript variant 1, mRNA [NM_001166635] | 0.42                  | 0.001   | 0.214           | -0.31                | 0.017   | 0.279           |
| Pdhb                                                    | NM_024221                  | ref Mus musculus pyruvate dehydrogenase (lipoamide) beta (Pdhb), nuclear gene encoding mitochondrial protein, mRNA [NM_024221]                | 0.42                  | 0.000   | 0.075           | -0.37                | 0.003   | 0.117           |
| 6530418L21Rik                                           | NM_175398                  | ref Mus musculus RIKEN cDNA 6530418L21 gene (6530418L21Rik), transcript variant 1, mRNA [NM_175398]                                           | 0.36                  | 0.008   | 0.694           | -0.36                | 0.017   | 0.278           |

| Online Supplemental Table IV: mG4H-Veh and Con-STZ Both |                           |                                                                                                                           |                       |         |                 |                      |         |                 |
|---------------------------------------------------------|---------------------------|---------------------------------------------------------------------------------------------------------------------------|-----------------------|---------|-----------------|----------------------|---------|-----------------|
| Gene Symbol                                             | RefSeq                    | Description                                                                                                               | logFC<br>mG4H-<br>Veh | P-value | Adj.<br>P-value | logFC<br>Con-<br>STZ | P-value | Adj.<br>P-value |
| Gm8513                                                  | XR_031090                 | ref PREDICTED: Mus musculus similar to Predicted gene, EG277333 (LOC667204), misc RNA [XR_031090]                         | 0.36                  | 0.008   | 0.696           | -0.25                | 0.023   | 0.319           |
| Ppp1r3b                                                 | NM_177741                 | ref Mus musculus protein phosphatase 1, regulatory (inhibitor) subunit 3B (Ppp1r3b), mRNA [NM_177741]                     | 0.36                  | 0.001   | 0.331           | -0.34                | 0.005   | 0.154           |
| Mrgprh                                                  | NM_030726                 | ref Mus musculus MAS-related GPR, member H (Mrgprh), mRNA [NM_030726]                                                     | 0.35                  | 0.002   | 0.404           | -0.37                | 0.024   | 0.328           |
| Vax2                                                    | NM_011912                 | ref Mus musculus ventral anterior homeobox containing gene 2 (Vax2), mRNA [NM_011912]                                     | 0.33                  | 0.002   | 0.392           | -0.51                | 0.000   | 0.029           |
| Gm9127                                                  | XR_002168                 | ref PREDICTED: Mus musculus predicted gene, EG668361 (EG668361), misc RNA [XR_002168]                                     | 0.33                  | 0.013   | 0.793           | -0.24                | 0.036   | 0.392           |
| Rpia                                                    | NM_009075                 | ref Mus musculus ribose 5-phosphate isomerase A (Rpia), mRNA [NM_009075]                                                  | 0.32                  | 0.003   | 0.488           | -0.38                | 0.011   | 0.218           |
| Hs2st1                                                  | NM_011828                 | ref Mus musculus heparan sulfate 2-O-sulfotransferase 1 (Hs2st1), mRNA [NM_011828]                                        | 0.32                  | 0.007   | 0.675           | -0.42                | 0.003   | 0.117           |
| Gm9034                                                  | XM_001477881              | ref PREDICTED: Mus musculus predicted gene, EG668192 (EG668192), mRNA [XM_001477881]                                      | 0.32                  | 0.001   | 0.256           | -0.26                | 0.007   | 0.181           |
| Gm15294                                                 | XR_004747                 | ref PREDICTED: Mus musculus similar to Glyceraldehyde-3-phosphate dehydrogenase (LOC675199), misc RNA [XR_004747]         | 0.32                  | 0.009   | 0.737           | -0.32                | 0.009   | 0.201           |
| Gm8565                                                  | XR_030907                 | ref PREDICTED: Mus musculus similar to uracil DNA glycosylase (LOC674410), misc RNA [XR_030907]                           | 0.31                  | 0.002   | 0.403           | -0.58                | 0.040   | 0.417           |
| Ccdc69                                                  | NM_177471                 | ref Mus musculus coiled-coil domain containing 69 (Ccdc69), mRNA [NM_177471]                                              | 0.31                  | 0.021   | 0.897           | -0.90                | 0.001   | 0.059           |
| chr17:29571806-29603008_F                               | chr17:29571806-29603008_F | lincRNA:chr17:29571806-29603008 forward strand                                                                            | 0.31                  | 0.038   | 1.000           | -0.36                | 0.008   | 0.194           |
| Gcgr                                                    | NM_008101                 | ref Mus musculus glucagon receptor (Gcgr), mRNA [NM_008101]                                                               | 0.31                  | 0.037   | 1.000           | -0.22                | 0.027   | 0.345           |
| Gm5976                                                  | XR_031113                 | ref PREDICTED: Mus musculus similar to Glyceraldehyde-3-phosphate dehydrogenase (GAPDH) (LOC546736), misc RNA [XR_031113] | 0.30                  | 0.002   | 0.357           | -0.38                | 0.001   | 0.074           |
| Gapdh                                                   | NM_008084                 | ref Mus musculus glyceraldehyde-3-phosphate dehydrogenase (Gapdh), mRNA [NM_008084]                                       | 0.30                  | 0.007   | 0.672           | -0.26                | 0.020   | 0.298           |

| Online Supplemental Table IV: mG4H-Veh and Con-STZ Both |                           |                                                                                                                           |                       |         |                 |                      |         |                 |
|---------------------------------------------------------|---------------------------|---------------------------------------------------------------------------------------------------------------------------|-----------------------|---------|-----------------|----------------------|---------|-----------------|
| Gene Symbol                                             | RefSeq                    | Description                                                                                                               | logFC<br>mG4H-<br>Veh | P-value | Adj.<br>P-value | logFC<br>Con-<br>STZ | P-value | Adj.<br>P-value |
| Gm7189                                                  | XM_912249                 | ref PREDICTED: Mus musculus predicted gene, EG636756 (EG636756), mRNA [XM_912249]                                         | 0.30                  | 0.017   | 0.862           | -0.32                | 0.011   | 0.216           |
| Zfp462                                                  | NM_172867                 | ref Mus musculus zinc finger protein 462 (Zfp462), mRNA [NM_172867]                                                       | 0.29                  | 0.038   | 1.000           | -0.45                | 0.010   | 0.208           |
| Gm5327                                                  | XM_357732                 | ref PREDICTED: Mus musculus predicted gene, EG384591 (EG384591), mRNA [XM_357732]                                         | 0.29                  | 0.002   | 0.397           | -0.66                | 0.035   | 0.388           |
| LOC674958                                               | XR_031712                 | ref PREDICTED: Mus musculus similar to uracil DNA glycosylase (LOC674958), misc RNA [XR_031712]                           | 0.29                  | 0.003   | 0.447           | -0.41                | 0.001   | 0.067           |
| Gm8864                                                  | XR_031141                 | ref PREDICTED: Mus musculus similar to glyceraldehyde-3-phosphate-dehydrogenase (LOC667891), misc RNA [XR_031141]         | 0.29                  | 0.001   | 0.209           | -0.36                | 0.001   | 0.073           |
| chr17:29571806-29603008_F                               | chr17:29571806-29603008_F | lincRNA:chr17:29571806-29603008 forward strand                                                                            | 0.29                  | 0.026   | 0.971           | -0.96                | 0.001   | 0.064           |
| Gm14130                                                 | XR_034976                 | ref PREDICTED: Mus musculus predicted gene, EG667048 (EG667048), misc RNA [XR_034976]                                     | 0.29                  | 0.001   | 0.218           | -0.35                | 0.001   | 0.057           |
| Gm3809                                                  | XR_032441                 | ref PREDICTED: Mus musculus similar to glyceraldehyde-3-phosphate dehydrogenase (LOC100046117), misc RNA [XR_032441]      | 0.28                  | 0.008   | 0.708           | -0.24                | 0.010   | 0.214           |
| Gm7784                                                  | XR_031875                 | ref PREDICTED: Mus musculus similar to Glyceraldehyde-3-phosphate dehydrogenase (GAPDH) (LOC665782), misc RNA [XR_031875] | 0.28                  | 0.004   | 0.523           | -0.33                | 0.007   | 0.175           |
| Gm8357                                                  | XR_033155                 | ref PREDICTED: Mus musculus similar to uracil DNA glycosylase (LOC666909), misc RNA [XR_033155]                           | 0.28                  | 0.014   | 0.813           | -0.33                | 0.006   | 0.160           |
| Ppp1r3c                                                 | NM_016854                 | ref Mus musculus protein phosphatase 1, regulatory (inhibitor) subunit 3C (Ppp1r3c), mRNA [NM_016854]                     | 0.28                  | 0.008   | 0.708           | -0.49                | 0.002   | 0.093           |
| LOC677301                                               | XR_033212                 | ref PREDICTED: Mus musculus similar to Glyceraldehyde-3-phosphate dehydrogenase (LOC677301), misc RNA [XR_033212]         | 0.28                  | 0.003   | 0.457           | -0.37                | 0.002   | 0.086           |
| Gm6981                                                  | NR_023357                 | ref Mus musculus predicted pseudogene 6981 (Gm6981), non-coding RNA [NR_023357]                                           | 0.28                  | 0.004   | 0.538           | -0.28                | 0.005   | 0.150           |
| Cmb1                                                    | NM_181588                 | ref Mus musculus carboxymethylenebutenolidase-like (Pseudomonas) (Cmb1), mRNA [NM_181588]                                 | 0.27                  | 0.008   | 0.694           | -0.33                | 0.007   | 0.172           |

| Online Supplemental Table IV: mG4H-Veh and Con-STZ Both |           |                                                                                                                      |                       |         |                 |                      |         |                 |
|---------------------------------------------------------|-----------|----------------------------------------------------------------------------------------------------------------------|-----------------------|---------|-----------------|----------------------|---------|-----------------|
| Gene Symbol                                             | RefSeq    | Description                                                                                                          | logFC<br>mG4H-<br>Veh | P-value | Adj.<br>P-value | logFC<br>Con-<br>STZ | P-value | Adj.<br>P-value |
| <b>Relt</b>                                             | NM_177073 | ref[Mus musculus RELT tumor necrosis factor receptor (Relt), mRNA [NM_177073]                                        | 0.27                  | 0.009   | 0.737           | -0.47                | 0.005   | 0.147           |
| <b>Gm2076</b>                                           | XR_030703 | ref[PREDICTED: Mus musculus similar to glyceraldehyde-3-phosphate-dehydrogenase (LOC100039163), misc RNA [XR_030703] | 0.27                  | 0.004   | 0.547           | -0.27                | 0.005   | 0.154           |
| <b>Gm9568</b>                                           | XR_032493 | ref[PREDICTED: Mus musculus similar to glyceraldehyde-3-phosphate dehydrogenase (LOC672572), misc RNA [XR_032493]    | 0.27                  | 0.005   | 0.613           | -0.44                | 0.000   | 0.028           |
| <b>LOC676449</b>                                        | XR_032886 | ref[PREDICTED: Mus musculus similar to Glyceraldehyde-3-phosphate dehydrogenase (LOC676449), misc RNA [XR_032886]    | 0.27                  | 0.009   | 0.737           | -0.29                | 0.005   | 0.152           |
| <b>Gm5210</b>                                           | XR_031075 | ref[PREDICTED: Mus musculus similar to uracil DNA glycosylase (LOC382969), misc RNA [XR_031075]                      | 0.26                  | 0.003   | 0.487           | -0.42                | 0.000   | 0.034           |
| <b>Ociad2</b>                                           | NM_026950 | ref[Mus musculus OCIA domain containing 2 (Ociad2), mRNA [NM_026950]                                                 | 0.26                  | 0.043   | 1.000           | -0.62                | 0.000   | 0.015           |
| <b>Gm5069</b>                                           | NR_003623 | ref[Mus musculus predicted pseudogene 5069 (Gm5069), non-coding RNA [NR_003623]                                      | 0.26                  | 0.006   | 0.630           | -0.33                | 0.005   | 0.150           |
| <b>Gm11214</b>                                          | XR_031348 | ref[PREDICTED: Mus musculus similar to glyceraldehyde-3-phosphate dehydrogenase (LOC667451), misc RNA [XR_031348]    | 0.26                  | 0.011   | 0.781           | -0.31                | 0.005   | 0.152           |
| <b>Golt1a</b>                                           | NM_026680 | ref[Mus musculus golgi transport 1 homolog A (S. cerevisiae) (Golt1a), mRNA [NM_026680]                              | 0.26                  | 0.037   | 1.000           | -0.41                | 0.004   | 0.127           |
| <b>Gm5069</b>                                           | NR_003623 | ref[Mus musculus predicted pseudogene 5069 (Gm5069), non-coding RNA [NR_003623]                                      | 0.26                  | 0.028   | 0.984           | -0.30                | 0.012   | 0.235           |
| <b>Gm8756</b>                                           | XR_030992 | ref[PREDICTED: Mus musculus similar to uracil DNA glycosylase (LOC667676), misc RNA [XR_030992]                      | 0.26                  | 0.010   | 0.762           | -0.27                | 0.004   | 0.139           |
| <b>4930447J18Rik</b>                                    | XM_898953 | ref[PREDICTED: Mus musculus RIKEN cDNA 4930447J18 gene (4930447J18Rik), mRNA [XM_898953]                             | 0.26                  | 0.030   | 0.998           | -0.32                | 0.031   | 0.369           |
| <b>Gm6981</b>                                           | NR_023357 | ref[Mus musculus predicted pseudogene 6981 (Gm6981), non-coding RNA [NR_023357]                                      | 0.26                  | 0.007   | 0.677           | -0.31                | 0.004   | 0.130           |



| Online Supplemental Table IV: mG4H-Veh and Con-STZ Both |                    |                                                                                                                              |                       |         |                 |                      |         |                 |
|---------------------------------------------------------|--------------------|------------------------------------------------------------------------------------------------------------------------------|-----------------------|---------|-----------------|----------------------|---------|-----------------|
| Gene Symbol                                             | RefSeq             | Description                                                                                                                  | logFC<br>mG4H-<br>Veh | P-value | Adj.<br>P-value | logFC<br>Con-<br>STZ | P-value | Adj.<br>P-value |
| Gm11953                                                 | XR_031516          | ref PREDICTED: Mus musculus similar to Glyceraldehyde-3-phosphate dehydrogenase (GAPDH) (LOC100044933), misc RNA [XR_031516] | 0.25                  | 0.003   | 0.434           | -0.38                | 0.000   | 0.035           |
| Gm6298                                                  | XR_032508          | ref PREDICTED: Mus musculus similar to Glyceraldehyde-3-phosphate dehydrogenase (GAPDH) (LOC622213), misc RNA [XR_032508]    | 0.25                  | 0.008   | 0.708           | -0.26                | 0.014   | 0.251           |
| Gm2546                                                  | XR_031094          | ref PREDICTED: Mus musculus similar to glyceraldehyde-3-phosphate dehydrogenase (LOC100040001), misc RNA [XR_031094]         | 0.25                  | 0.006   | 0.661           | -0.30                | 0.005   | 0.150           |
| Hlf                                                     | NM_172563          | ref Mus musculus hepatic leukemia factor (Hlf), mRNA [NM_172563]                                                             | 0.25                  | 0.014   | 0.825           | -0.52                | 0.000   | 0.028           |
| Gm3534                                                  | XM_001477082       | ref PREDICTED: Mus musculus similar to Glyceraldehyde-3-phosphate dehydrogenase (GAPDH) (LOC100041831), mRNA [XM_001477082]  | 0.25                  | 0.019   | 0.881           | -0.26                | 0.012   | 0.238           |
| Gm5760                                                  | XR_030913          | ref PREDICTED: Mus musculus similar to Glyceraldehyde-3-phosphate dehydrogenase (GAPDH) (LOC436219), misc RNA [XR_030913]    | 0.25                  | 0.009   | 0.733           | -0.32                | 0.004   | 0.140           |
| Gm9522                                                  | XR_030565          | ref PREDICTED: Mus musculus similar to glyceraldehyde-3-phosphate dehydrogenase (LOC671215), misc RNA [XR_030565]            | 0.25                  | 0.002   | 0.401           | -0.34                | 0.002   | 0.103           |
| Ralgps1                                                 | NM_175211          | ref Mus musculus Ral GEF with PH domain and SH3 binding motif 1 (Ralgps1), mRNA [NM_175211]                                  | 0.25                  | 0.008   | 0.694           | -0.43                | 0.000   | 0.039           |
| Gm4929                                                  | XR_031578          | ref PREDICTED: Mus musculus similar to Glyceraldehyde-3-phosphate dehydrogenase (LOC238091), misc RNA [XR_031578]            | 0.25                  | 0.005   | 0.581           | -0.31                | 0.002   | 0.096           |
| Gm7611                                                  | XR_031991          | ref PREDICTED: Mus musculus similar to Glyceraldehyde-3-phosphate dehydrogenase (GAPDH) (LOC675163), misc RNA [XR_031991]    | 0.25                  | 0.002   | 0.409           | -0.46                | 0.002   | 0.097           |
| Gm8170                                                  | XR_034355          | ref PREDICTED: Mus musculus similar to uracil DNA glycosylase (LOC666571), misc RNA [XR_034355]                              | 0.25                  | 0.017   | 0.860           | -0.29                | 0.005   | 0.154           |
| BC034090                                                | ENSMUST00000035914 | ens MKIAA1614 protein Fragment [Source:UniProtKB/TrEMBL;Acc:Q6ZPL5] [ENSMUST00000035914]                                     | 0.25                  | 0.032   | 1.000           | -0.34                | 0.015   | 0.260           |

| Online Supplemental Table IV: mG4H-Veh and Con-STZ Both |                           |                                                                                                                                                   |                       |         |                 |                      |         |                 |
|---------------------------------------------------------|---------------------------|---------------------------------------------------------------------------------------------------------------------------------------------------|-----------------------|---------|-----------------|----------------------|---------|-----------------|
| Gene Symbol                                             | RefSeq                    | Description                                                                                                                                       | logFC<br>mG4H-<br>Veh | P-value | Adj.<br>P-value | logFC<br>Con-<br>STZ | P-value | Adj.<br>P-value |
| Gm10290                                                 | ENSMUST00000094104        | ref PREDICTED: Mus musculus similar to Glyceraldehyde-3-phosphate dehydrogenase (GAPDH), transcript variant 1 (LOC100039258), mRNA [XM_001472531] | 0.25                  | 0.013   | 0.802           | -0.39                | 0.001   | 0.049           |
| chr17:71242333-71273533_F                               | chr17:71242333-71273533_F | lincRNA:chr17:71242333-71273533 forward strand                                                                                                    | 0.25                  | 0.041   | 1.000           | -0.50                | 0.001   | 0.060           |
| Gm16470                                                 | XM_001478412              | ref PREDICTED: Mus musculus similar to Glyceraldehyde-3-phosphate dehydrogenase (GAPDH) (LOC676923), mRNA [XM_001478412]                          | 0.24                  | 0.013   | 0.808           | -0.28                | 0.015   | 0.263           |
| Gm9081                                                  | XR_030920                 | ref PREDICTED: Mus musculus similar to glyceraldehyde-3-phosphate dehydrogenase (LOC668275), misc RNA [XR_030920]                                 | 0.24                  | 0.005   | 0.578           | -0.31                | 0.004   | 0.130           |
| Stat5a                                                  | NM_011488                 | ref Mus musculus signal transducer and activator of transcription 5A (Stat5a), transcript variant 1, mRNA [NM_011488]                             | 0.24                  | 0.023   | 0.936           | -0.41                | 0.036   | 0.392           |
| Gm8529                                                  | XR_033512                 | ref PREDICTED: Mus musculus similar to uracil DNA glycosylase (LOC667233), misc RNA [XR_033512]                                                   | 0.24                  | 0.015   | 0.827           | -0.30                | 0.002   | 0.099           |
| Gm6322                                                  | XR_031468                 | ref PREDICTED: Mus musculus similar to Glyceraldehyde-3-phosphate dehydrogenase (LOC622432), misc RNA [XR_031468]                                 | 0.24                  | 0.017   | 0.854           | -0.34                | 0.005   | 0.146           |
| Gm5069                                                  | NR_003623                 | ref Mus musculus predicted pseudogene 5069 (Gm5069), non-coding RNA [NR_003623]                                                                   | 0.24                  | 0.006   | 0.641           | -0.28                | 0.008   | 0.189           |
| BC048355                                                | NM_207161                 | ref Mus musculus cDNA sequence BC048355 (BC048355), mRNA [NM_207161]                                                                              | 0.23                  | 0.042   | 1.000           | -0.52                | 0.001   | 0.078           |
| Cblc                                                    | NM_001161844              | ref Mus musculus Casitas B-lineage lymphoma c (Cblc), transcript variant 2, mRNA [NM_001161844]                                                   | 0.23                  | 0.010   | 0.752           | -0.37                | 0.007   | 0.181           |
| ENSMUST00000108587                                      | ENSMUST00000108587        | ens troponin T1, skeletal, slow Gene [Source:MGI Symbol;Acc:MGI:1333868] [ENSMUST00000108587]                                                     | 0.23                  | 0.019   | 0.881           | -0.62                | 0.000   | 0.009           |
| Pot1a                                                   | NM_133931                 | ref Mus musculus protection of telomeres 1A (Pot1a), mRNA [NM_133931]                                                                             | 0.23                  | 0.018   | 0.864           | -0.34                | 0.001   | 0.074           |
| Gm13668                                                 | XR_032757                 | ref PREDICTED: Mus musculus similar to Glyceraldehyde-3-phosphate dehydrogenase (LOC622659), misc RNA [XR_032757]                                 | 0.23                  | 0.009   | 0.729           | -0.44                | 0.001   | 0.068           |

| Online Supplemental Table IV: mG4H-Veh and Con-STZ Both |                          |                                                                                                                           |                       |         |                 |                      |         |                 |
|---------------------------------------------------------|--------------------------|---------------------------------------------------------------------------------------------------------------------------|-----------------------|---------|-----------------|----------------------|---------|-----------------|
| Gene Symbol                                             | RefSeq                   | Description                                                                                                               | logFC<br>mG4H-<br>Veh | P-value | Adj.<br>P-value | logFC<br>Con-<br>STZ | P-value | Adj.<br>P-value |
| Gm5863                                                  | XM_001487781             | ref PREDICTED: Mus musculus predicted gene, EG545741, transcript variant 1 (EG545741), mRNA [XM_001487781]                | 0.22                  | 0.019   | 0.881           | -0.39                | 0.001   | 0.049           |
| Gm7251                                                  | ENSMUST00000091621       | ref PREDICTED: Mus musculus predicted gene, EG638833 (EG638833), mRNA [XM_914987]                                         | 0.22                  | 0.015   | 0.829           | -0.42                | 0.000   | 0.037           |
| Gm9061                                                  | XR_034310                | ref PREDICTED: Mus musculus similar to Glyceraldehyde-3-phosphate dehydrogenase (GAPDH) (LOC668242), misc RNA [XR_034310] | 0.22                  | 0.010   | 0.743           | -0.33                | 0.002   | 0.081           |
| ENSMUST00000148137                                      | ENSMUST00000148137       | ref PREDICTED: Mus musculus predicted gene, EG329055 (EG329055), mRNA [XM_991957]                                         | 0.22                  | 0.039   | 1.000           | -0.38                | 0.002   | 0.082           |
| Gm8055                                                  | XM_986164                | ref PREDICTED: Mus musculus predicted gene, EG666342 (EG666342), mRNA [XM_986164]                                         | 0.22                  | 0.008   | 0.708           | -0.32                | 0.003   | 0.117           |
| Gapdh                                                   | NM_008084                | ref Mus musculus glyceraldehyde-3-phosphate dehydrogenase (Gapdh), mRNA [NM_008084]                                       | 0.22                  | 0.020   | 0.895           | -0.26                | 0.009   | 0.196           |
| Gm8824                                                  | XR_002080                | ref PREDICTED: Mus musculus predicted gene, EG667802 (EG667802), misc RNA [XR_002080]                                     | 0.22                  | 0.016   | 0.848           | -0.37                | 0.001   | 0.067           |
| Gm6283                                                  | XR_031548                | ref PREDICTED: Mus musculus similar to Glyceraldehyde-3-phosphate dehydrogenase (LOC622075), misc RNA [XR_031548]         | 0.22                  | 0.019   | 0.881           | -0.29                | 0.002   | 0.102           |
| Man2a2                                                  | ENSMUST00000098346       | ens mannosidase 2, alpha 2 Gene [Source:MGI Symbol;Acc:MGI:2150656] [ENSMUST00000098346]                                  | 0.22                  | 0.005   | 0.589           | -0.20                | 0.025   | 0.330           |
| chr4:32294119-32294941_F                                | chr4:32294119-32294941_F | lincRNA:chr4:32294119-32294941 forward strand                                                                             | 0.22                  | 0.036   | 1.000           | -0.36                | 0.002   | 0.086           |
| Gm12969                                                 | XR_031034                | ref PREDICTED: Mus musculus similar to Glyceraldehyde-3-phosphate dehydrogenase (GAPDH) (LOC667354), misc RNA [XR_031034] | 0.22                  | 0.009   | 0.714           | -0.37                | 0.000   | 0.044           |
| Ehmt1                                                   | NM_001012518             | ref Mus musculus euchromatic histone methyltransferase 1 (Ehmt1), transcript variant 1, mRNA [NM_001012518]               | 0.21                  | 0.028   | 0.983           | -0.35                | 0.004   | 0.135           |
| Gm8927                                                  | XR_032307                | ref PREDICTED: Mus musculus similar to Glyceraldehyde-3-phosphate dehydrogenase (GAPDH) (LOC668018), misc RNA [XR_032307] | 0.21                  | 0.031   | 0.999           | -0.33                | 0.005   | 0.153           |

| Online Supplemental Table IV: mG4H-Veh and Con-STZ Both |              |                                                                                                                                   |                       |         |                 |                      |         |                 |
|---------------------------------------------------------|--------------|-----------------------------------------------------------------------------------------------------------------------------------|-----------------------|---------|-----------------|----------------------|---------|-----------------|
| Gene Symbol                                             | RefSeq       | Description                                                                                                                       | logFC<br>mG4H-<br>Veh | P-value | Adj.<br>P-value | logFC<br>Con-<br>STZ | P-value | Adj.<br>P-value |
| LOC634088                                               | XM_908700    | ref PREDICTED: Mus musculus similar to Glyceraldehyde-3-phosphate dehydrogenase (LOC634088), mRNA [XM_908700]                     | 0.21                  | 0.007   | 0.674           | -0.63                | 0.011   | 0.220           |
| Gm4929                                                  | XR_031578    | ref PREDICTED: Mus musculus similar to Glyceraldehyde-3-phosphate dehydrogenase (LOC238091), misc RNA [XR_031578]                 | 0.21                  | 0.029   | 0.988           | -0.29                | 0.009   | 0.206           |
| LOC677637                                               | XR_030830    | ref PREDICTED: Mus musculus similar to uracil DNA glycosylase (LOC677637), misc RNA [XR_030830]                                   | 0.21                  | 0.033   | 1.000           | -0.33                | 0.005   | 0.150           |
| Lmf1                                                    | NM_029624    | ref Mus musculus lipase maturation factor 1 (Lmf1), mRNA [NM_029624]                                                              | 0.21                  | 0.015   | 0.831           | -0.30                | 0.011   | 0.218           |
| LOC637280                                               | XR_033802    | ref PREDICTED: Mus musculus similar to Glyceraldehyde-3-phosphate dehydrogenase (GAPDH) (LOC637280), misc RNA [XR_033802]         | 0.21                  | 0.010   | 0.759           | -0.28                | 0.006   | 0.168           |
| Gm5507                                                  | XM_484732    | ref PREDICTED: Mus musculus predicted gene, EG433184 (EG433184), mRNA [XM_484732]                                                 | 0.21                  | 0.012   | 0.783           | -0.33                | 0.004   | 0.132           |
| Ak4                                                     | NM_001177602 | ref Mus musculus adenylate kinase 4 (Ak4), nuclear gene encoding mitochondrial protein, transcript variant 1, mRNA [NM_001177602] | 0.20                  | 0.036   | 1.000           | -0.54                | 0.009   | 0.203           |
| Gm11453                                                 | XR_032746    | ref PREDICTED: Mus musculus similar to Glyceraldehyde-3-phosphate dehydrogenase (GAPDH) (LOC241765), misc RNA [XR_032746]         | 0.20                  | 0.016   | 0.846           | -0.37                | 0.001   | 0.064           |
| Gm4398                                                  | XR_034518    | ref PREDICTED: Mus musculus similar to Glyceraldehyde-3-phosphate dehydrogenase (GAPDH) (LOC100043373), misc RNA [XR_034518]      | 0.20                  | 0.027   | 0.983           | -0.30                | 0.008   | 0.194           |
| Gm15593                                                 | XR_032736    | ref PREDICTED: Mus musculus similar to Glyceraldehyde-3-phosphate dehydrogenase (LOC386426), misc RNA [XR_032736]                 | 0.20                  | 0.037   | 1.000           | -0.26                | 0.012   | 0.234           |
| Lynx1                                                   | NM_011838    | ref Mus musculus Ly6/neurotoxin 1 (Lynx1), mRNA [NM_011838]                                                                       | 0.19                  | 0.017   | 0.854           | -0.47                | 0.001   | 0.064           |
| Gapdh                                                   | NM_008084    | ref Mus musculus glyceraldehyde-3-phosphate dehydrogenase (Gapdh), mRNA [NM_008084]                                               | 0.19                  | 0.022   | 0.934           | -0.34                | 0.002   | 0.093           |

| Online Supplemental Table IV: mG4H-Veh and Con-STZ Both |              |                                                                                                                           |                       |         |                 |                      |         |                 |
|---------------------------------------------------------|--------------|---------------------------------------------------------------------------------------------------------------------------|-----------------------|---------|-----------------|----------------------|---------|-----------------|
| Gene Symbol                                             | RefSeq       | Description                                                                                                               | logFC<br>mG4H-<br>Veh | P-value | Adj.<br>P-value | logFC<br>Con-<br>STZ | P-value | Adj.<br>P-value |
| Gm7985                                                  | XR_034366    | ref PREDICTED: Mus musculus similar to glyceraldehyde-3-phosphate dehydrogenase (LOC666213), misc RNA [XR_034366]         | 0.19                  | 0.035   | 1.000           | -0.28                | 0.010   | 0.216           |
| Slc26a6                                                 | NM_134420    | ref Mus musculus solute carrier family 26, member 6 (Slc26a6), mRNA [NM_134420]                                           | 0.19                  | 0.016   | 0.848           | -0.30                | 0.002   | 0.094           |
| Gapdh                                                   | NM_008084    | ref Mus musculus glyceraldehyde-3-phosphate dehydrogenase (Gapdh), mRNA [NM_008084]                                       | 0.19                  | 0.044   | 1.000           | -0.42                | 0.001   | 0.070           |
| Gm7191                                                  | XR_032786    | ref PREDICTED: Mus musculus similar to Glyceraldehyde-3-phosphate dehydrogenase (LOC636859), misc RNA [XR_032786]         | 0.19                  | 0.023   | 0.936           | -0.27                | 0.007   | 0.181           |
| Gapdh                                                   | NM_008084    | ref Mus musculus glyceraldehyde-3-phosphate dehydrogenase (Gapdh), mRNA [NM_008084]                                       | 0.18                  | 0.031   | 0.998           | -0.24                | 0.013   | 0.248           |
| Atxn7                                                   | NM_139227    | ref Mus musculus ataxin 7 (Atxn7), mRNA [NM_139227]                                                                       | 0.18                  | 0.024   | 0.957           | -0.35                | 0.001   | 0.059           |
| Kcna4                                                   | NM_021275    | ref Mus musculus potassium voltage-gated channel, shaker-related subfamily, member 4 (Kcna4), mRNA [NM_021275]            | 0.18                  | 0.044   | 1.000           | -0.31                | 0.005   | 0.153           |
| Pdlim4                                                  | NM_019417    | ref Mus musculus PDZ and LIM domain 4 (Pdlim4), mRNA [NM_019417]                                                          | 0.18                  | 0.039   | 1.000           | -0.65                | 0.000   | 0.017           |
| Gm10313                                                 | XM_001473650 | ref PREDICTED: Mus musculus similar to LOC654472 protein (LOC100039875), mRNA [XM_001473650]                              | 0.17                  | 0.029   | 0.987           | -0.35                | 0.005   | 0.148           |
| Gm5732                                                  | XR_005028    | ref PREDICTED: Mus musculus similar to Glyceraldehyde-3-phosphate dehydrogenase (GAPDH) (LOC435963), misc RNA [XR_005028] | 0.16                  | 0.047   | 1.000           | -0.46                | 0.001   | 0.054           |
| Gm12070                                                 | NR_002890    | ref Mus musculus predicted gene 12070 (Gm12070), non-coding RNA [NR_002890]                                               | 0.16                  | 0.033   | 1.000           | -0.23                | 0.016   | 0.273           |
| Mycbp                                                   | NM_019660    | ref Mus musculus c-myc binding protein (Mycbp), mRNA [NM_019660]                                                          | 0.15                  | 0.048   | 1.000           | -0.20                | 0.044   | 0.432           |
| Arl4a                                                   | NM_001039515 | ref Mus musculus ADP-ribosylation factor-like 4A (Arl4a), transcript variant 2, mRNA [NM_001039515]                       | -0.15                 | 0.045   | 1.000           | 0.39                 | 0.031   | 0.367           |
| Ndr1                                                    | NM_008681    | ref Mus musculus N-myc downstream regulated gene 1 (Ndr1), mRNA [NM_008681]                                               | -0.16                 | 0.049   | 1.000           | 0.27                 | 0.048   | 0.451           |

| Online Supplemental Table IV: mG4H-Veh and Con-STZ Both |                           |                                                                                                                                                                                                       |                       |         |                 |                      |         |                 |
|---------------------------------------------------------|---------------------------|-------------------------------------------------------------------------------------------------------------------------------------------------------------------------------------------------------|-----------------------|---------|-----------------|----------------------|---------|-----------------|
| Gene Symbol                                             | RefSeq                    | Description                                                                                                                                                                                           | logFC<br>mG4H-<br>Veh | P-value | Adj.<br>P-value | logFC<br>Con-<br>STZ | P-value | Adj.<br>P-value |
| <b>Slco2b1</b>                                          | NM_175316                 | ref Mus musculus solute carrier organic anion transporter family, member 2b1 (Slco2b1), mRNA [NM_175316]                                                                                              | -0.16                 | 0.043   | 1.000           | 0.29                 | 0.010   | 0.209           |
| <b>Abcg2</b>                                            | NM_011920                 | ref Mus musculus ATP-binding cassette, sub-family G (WHITE), member 2 (Abcg2), mRNA [NM_011920]                                                                                                       | -0.16                 | 0.043   | 1.000           | 0.47                 | 0.003   | 0.106           |
| <b>Sorbs1</b>                                           | NM_178362                 | ref Mus musculus sorbin and SH3 domain containing 1 (Sorbs1), transcript variant 2, mRNA [NM_178362]                                                                                                  | -0.17                 | 0.030   | 0.998           | 0.29                 | 0.013   | 0.247           |
| <b>Perp</b>                                             | NM_022032                 | ref Mus musculus PERP, TP53 apoptosis effector (Perp), mRNA [NM_022032]                                                                                                                               | -0.17                 | 0.031   | 1.000           | 0.27                 | 0.036   | 0.394           |
| <b>ENSMUST00000121334</b>                               | ENSMUST00000121334        | ens septin 8 Gene [Source:MGI (curated);Acc:MGI:894310] [ENSMUST00000121334]                                                                                                                          | -0.17                 | 0.031   | 1.000           | 0.33                 | 0.001   | 0.071           |
| <b>Nsmce2</b>                                           | NM_026746                 | ref Mus musculus non-SMC element 2 homolog (MMS21, S. cerevisiae) (Nsmce2), transcript variant 1, mRNA [NM_026746]                                                                                    | -0.17                 | 0.025   | 0.966           | 0.19                 | 0.045   | 0.441           |
| <b>chr17:35080914-35090009_R</b>                        | chr17:35080914-35090009_R | lincRNA:chr17:35080914-35090009 reverse strand                                                                                                                                                        | -0.18                 | 0.034   | 1.000           | 0.29                 | 0.033   | 0.376           |
| <b>Ilvbl</b>                                            | NM_173751                 | ref Mus musculus ilvB (bacterial acetolactate synthase)-like (Ilvbl), mRNA [NM_173751]                                                                                                                | -0.18                 | 0.016   | 0.851           | 0.23                 | 0.012   | 0.234           |
| <b>Lpar6</b>                                            | AK032901                  | gb Mus musculus 12 days embryo male wolffian duct includes surrounding region cDNA, RIKEN full-length enriched library, clone:6720469P13 product:P2Y PURINOCEPTOR 5, full insert sequence. [AK032901] | -0.18                 | 0.026   | 0.971           | 0.31                 | 0.002   | 0.104           |
| <b>Golga4</b>                                           | NM_018748                 | ref Mus musculus golgi autoantigen, golgin subfamily a, 4 (Golga4), mRNA [NM_018748]                                                                                                                  | -0.18                 | 0.032   | 1.000           | 0.22                 | 0.027   | 0.344           |
| <b>Gm5077</b>                                           | NM_173864                 | ref Mus musculus predicted gene 5077 (Gm5077), mRNA [NM_173864]                                                                                                                                       | -0.19                 | 0.048   | 1.000           | 0.35                 | 0.032   | 0.373           |
| <b>Sdf4</b>                                             | NM_011341                 | ref Mus musculus stromal cell derived factor 4 (Sdf4), mRNA [NM_011341]                                                                                                                               | -0.19                 | 0.017   | 0.858           | 0.21                 | 0.022   | 0.310           |
| <b>Skiv2l</b>                                           | NM_021337                 | ref Mus musculus superkiller viralicidic activity 2-like (S. cerevisiae) (Skiv2l), mRNA [NM_021337]                                                                                                   | -0.19                 | 0.033   | 1.000           | 0.21                 | 0.045   | 0.436           |
| <b>Ms4a4d</b>                                           | NM_025658                 | ref Mus musculus membrane-spanning 4-domains, subfamily A, member 4D (Ms4a4d), mRNA [NM_025658]                                                                                                       | -0.19                 | 0.042   | 1.000           | 0.34                 | 0.005   | 0.147           |



| Online Supplemental Table IV: mG4H-Veh and Con-STZ Both |                           |                                                                                                                      |                       |         |                 |                      |         |                 |
|---------------------------------------------------------|---------------------------|----------------------------------------------------------------------------------------------------------------------|-----------------------|---------|-----------------|----------------------|---------|-----------------|
| Gene Symbol                                             | RefSeq                    | Description                                                                                                          | logFC<br>mG4H-<br>Veh | P-value | Adj.<br>P-value | logFC<br>Con-<br>STZ | P-value | Adj.<br>P-value |
| <b>C1s</b>                                              | NM_144938                 | ref Mus musculus complement component 1, s subcomponent (C1s), transcript variant 1, mRNA [NM_144938]                | -0.21                 | 0.031   | 0.998           | 0.36                 | 0.031   | 0.368           |
| <b>Mvp</b>                                              | NM_080638                 | ref Mus musculus major vault protein (Mvp), mRNA [NM_080638]                                                         | -0.21                 | 0.029   | 0.991           | 0.26                 | 0.012   | 0.234           |
| <b>Prl2c1</b>                                           | NM_001045532              | ref Mus musculus Prolactin family 2, subfamily c, member 1 (Prl2c1), mRNA [NM_001045532]                             | -0.22                 | 0.021   | 0.898           | 0.67                 | 0.001   | 0.070           |
| <b>Ly6c1</b>                                            | NM_010741                 | ref Mus musculus lymphocyte antigen 6 complex, locus C1 (Ly6c1), mRNA [NM_010741]                                    | -0.23                 | 0.025   | 0.966           | 0.27                 | 0.040   | 0.415           |
| <b>Pbxip1</b>                                           | NM_146131                 | ref Mus musculus pre-B-cell leukemia transcription factor interacting protein 1 (Pbxip1), mRNA [NM_146131]           | -0.24                 | 0.005   | 0.588           | 0.20                 | 0.043   | 0.428           |
| <b>Gm6366</b>                                           | XR_030755                 | ref  PREDICTED: Mus musculus similar to protein phosphatase 2A inhibitor-2 I-2PP2A (LOC622870), misc RNA [XR_030755] | -0.25                 | 0.032   | 1.000           | 0.51                 | 0.001   | 0.053           |
| <b>chr11:96111499-96126224_R</b>                        | chr11:96111499-96126224_R | lincRNA:chr11:96111499-96126224 reverse strand                                                                       | -0.27                 | 0.011   | 0.772           | 0.61                 | 0.002   | 0.104           |
| <b>Ankrd1</b>                                           | NM_013468                 | ref Mus musculus ankyrin repeat domain 1 (cardiac muscle) (Ankrd1), mRNA [NM_013468]                                 | -0.28                 | 0.035   | 1.000           | 0.42                 | 0.001   | 0.055           |
| <b>chr18:61781410-61788685_R</b>                        | chr18:61781410-61788685_R | lincRNA:chr18:61781410-61788685 reverse strand                                                                       | -0.28                 | 0.012   | 0.789           | 0.44                 | 0.015   | 0.262           |
| <b>Pim3</b>                                             | NM_145478                 | ref Mus musculus proviral integration site 3 (Pim3), mRNA [NM_145478]                                                | -0.28                 | 0.016   | 0.848           | 0.72                 | 0.016   | 0.274           |
| <b>Ankrd23</b>                                          | NM_153502                 | ref Mus musculus ankyrin repeat domain 23 (Ankrd23), mRNA [NM_153502]                                                | -0.29                 | 0.028   | 0.983           | 0.38                 | 0.006   | 0.162           |
| <b>Il34</b>                                             | NM_029646                 | ref Mus musculus interleukin 34 (Il34), transcript variant 2, mRNA [NM_029646]                                       | -0.30                 | 0.001   | 0.328           | 0.32                 | 0.024   | 0.325           |
| <b>C3</b>                                               | NM_009778                 | ref Mus musculus complement component 3 (C3), mRNA [NM_009778]                                                       | -0.31                 | 0.038   | 1.000           | 0.79                 | 0.003   | 0.111           |
| <b>Ankrd23</b>                                          | NM_153502                 | ref Mus musculus ankyrin repeat domain 23 (Ankrd23), mRNA [NM_153502]                                                | -0.31                 | 0.009   | 0.720           | 0.36                 | 0.004   | 0.140           |
| <b>Hspa1l</b>                                           | NM_013558                 | ref Mus musculus heat shock protein 1-like (Hspa1l), mRNA [NM_013558]                                                | -0.33                 | 0.004   | 0.528           | 0.36                 | 0.034   | 0.385           |

| Online Supplemental Table IV: mG4H-Veh and Con-STZ Both |              |                                                                                                                     |                       |         |                 |                      |         |                 |
|---------------------------------------------------------|--------------|---------------------------------------------------------------------------------------------------------------------|-----------------------|---------|-----------------|----------------------|---------|-----------------|
| Gene Symbol                                             | RefSeq       | Description                                                                                                         | logFC<br>mG4H-<br>Veh | P-value | Adj.<br>P-value | logFC<br>Con-<br>STZ | P-value | Adj.<br>P-value |
| <b>1110034G24Rik</b>                                    | NM_028637    | ref Mus musculus RIKEN cDNA 1110034G24 gene (1110034G24Rik), mRNA [NM_028637]                                       | -0.36                 | 0.039   | 1.000           | 0.69                 | 0.035   | 0.388           |
| <b>Lrrc2</b>                                            | NM_028838    | ref Mus musculus leucine rich repeat containing 2 (Lrrc2), mRNA [NM_028838]                                         | -0.36                 | 0.002   | 0.397           | 0.34                 | 0.012   | 0.237           |
| <b>NEAT1</b>                                            | NEAT1        | lincRNA:chr19:5842306-5845476 reverse strand                                                                        | -0.37                 | 0.033   | 1.000           | 0.68                 | 0.017   | 0.277           |
| <b>Neil2</b>                                            | NM_201610    | ref Mus musculus nei like 2 (E. coli) (Neil2), mRNA [NM_201610]                                                     | -0.37                 | 0.008   | 0.708           | 0.62                 | 0.002   | 0.096           |
| <b>Car4</b>                                             | NM_007607    | ref Mus musculus carbonic anhydrase 4 (Car4), mRNA [NM_007607]                                                      | -0.38                 | 0.007   | 0.674           | 0.87                 | 0.002   | 0.104           |
| <b>NEAT1</b>                                            | NEAT1        | lincRNA:chr19:5842306-5845476 reverse strand                                                                        | -0.40                 | 0.015   | 0.830           | 0.72                 | 0.008   | 0.190           |
| <b>Glul</b>                                             | NM_008131    | ref Mus musculus glutamate-ammonia ligase (glutamine synthetase) (Glul), mRNA [NM_008131]                           | -0.40                 | 0.001   | 0.319           | 0.58                 | 0.018   | 0.284           |
| <b>Lrrc2</b>                                            | NM_028838    | ref Mus musculus leucine rich repeat containing 2 (Lrrc2), mRNA [NM_028838]                                         | -0.40                 | 0.001   | 0.205           | 0.33                 | 0.010   | 0.208           |
| <b>NEAT1</b>                                            | NEAT1        | lincRNA:chr19:5842306-5845476 reverse strand                                                                        | -0.42                 | 0.025   | 0.960           | 0.67                 | 0.011   | 0.228           |
| <b>Gm4949</b>                                           | XM_001478918 | ref  PREDICTED: Mus musculus similar to glutamine synthetase (LOC240219), mRNA [XM_001478918]                       | -0.43                 | 0.001   | 0.263           | 0.59                 | 0.032   | 0.374           |
| <b>NEAT1</b>                                            | NEAT1        | lincRNA:chr19:5842306-5845476 reverse strand                                                                        | -0.44                 | 0.010   | 0.762           | 0.74                 | 0.006   | 0.165           |
| <b>Gdf15</b>                                            | NM_011819    | ref Mus musculus growth differentiation factor 15 (Gdf15), mRNA [NM_011819]                                         | -0.44                 | 0.045   | 1.000           | 1.05                 | 0.004   | 0.130           |
| <b>A530016L24Rik</b>                                    | NM_177039    | ref Mus musculus RIKEN cDNA A530016L24 gene (A530016L24Rik), mRNA [NM_177039]                                       | -0.45                 | 0.013   | 0.799           | 0.31                 | 0.017   | 0.279           |
| <b>Neat1</b>                                            | NR_003513    | ref Mus musculus nuclear paraspeckle assembly transcript 1 (non-protein coding) (Neat1), non-coding RNA [NR_003513] | -0.47                 | 0.006   | 0.655           | 0.67                 | 0.009   | 0.201           |
| <b>NEAT1</b>                                            | NEAT1        | lincRNA:chr19:5842306-5845476 reverse strand                                                                        | -0.49                 | 0.006   | 0.641           | 0.66                 | 0.010   | 0.214           |
| <b>Timp4</b>                                            | NM_080639    | ref Mus musculus tissue inhibitor of metalloproteinase 4 (Timp4), mRNA [NM_080639]                                  | -0.66                 | 0.009   | 0.720           | 1.45                 | 0.015   | 0.263           |
| <b>Gsta2</b>                                            | NM_008182    | ref Mus musculus glutathione S-transferase, alpha 2 (Yc2) (Gsta2), mRNA [NM_008182]                                 | -0.69                 | 0.003   | 0.508           | 1.02                 | 0.023   | 0.317           |
| <b>Cnksr1</b>                                           | NM_001081047 | ref Mus musculus connector enhancer of kinase suppressor of Ras 1 (Cnksr1), mRNA [NM_001081047]                     | -0.74                 | 0.000   | 0.004           | 0.89                 | 0.001   | 0.061           |

| Online Supplemental Table IV: mG4H-Veh and Con-STZ Both |                          |                                                                                                                              |                       |         |                 |                      |         |                 |
|---------------------------------------------------------|--------------------------|------------------------------------------------------------------------------------------------------------------------------|-----------------------|---------|-----------------|----------------------|---------|-----------------|
| Gene Symbol                                             | RefSeq                   | Description                                                                                                                  | logFC<br>mG4H-<br>Veh | P-value | Adj.<br>P-value | logFC<br>Con-<br>STZ | P-value | Adj.<br>P-value |
| <b>chr9:78107225-78118850_F</b>                         | chr9:78107225-78118850_F | lincRNA:chr9:78107225-78118850 forward strand                                                                                | -0.79                 | 0.002   | 0.409           | 1.44                 | 0.009   | 0.199           |
| <b>Gsta1</b>                                            | NM_008181                | ref Mus musculus glutathione S-transferase, alpha 1 (Ya) (Gsta1), mRNA [NM_008181]                                           | -0.82                 | 0.002   | 0.432           | 1.43                 | 0.011   | 0.221           |
| <b>Nrn1l</b>                                            | NM_175024                | ref Mus musculus neuritin 1-like (Nm1l), mRNA [NM_175024]                                                                    | -0.82                 | 0.001   | 0.263           | 0.46                 | 0.008   | 0.195           |
| <b>chr9:78104935-78116974_F</b>                         | chr9:78104935-78116974_F | lincRNA:chr9:78104935-78116974 forward strand                                                                                | -0.89                 | 0.001   | 0.263           | 1.19                 | 0.015   | 0.263           |
| <b>Serpine1</b>                                         | NM_008871                | ref Mus musculus serine (or cysteine) peptidase inhibitor, clade E, member 1 (Serpine1), mRNA [NM_008871]                    | -0.92                 | 0.000   | 0.008           | 2.06                 | 0.000   | 0.003           |
| <b>chr9:78107225-78118850_F</b>                         | chr9:78107225-78118850_F | lincRNA:chr9:78107225-78118850 forward strand                                                                                | -0.93                 | 0.000   | 0.186           | 1.47                 | 0.006   | 0.158           |
| <b>Gm10639</b>                                          | NM_001122660             | ref Mus musculus predicted gene 10639 (Gm10639), mRNA [NM_001122660]                                                         | -0.96                 | 0.000   | 0.147           | 1.17                 | 0.014   | 0.250           |
| <b>Mrps30</b>                                           | NM_021556                | ref Mus musculus mitochondrial ribosomal protein S30 (Mrps30), nuclear gene encoding mitochondrial protein, mRNA [NM_021556] | -0.14                 | 0.048   | 1.000           | -0.16                | 0.049   | 0.455           |
| <b>Rnf7</b>                                             | NM_011279                | ref Mus musculus ring finger protein 7 (Rnf7), mRNA [NM_011279]                                                              | -0.15                 | 0.032   | 1.000           | -0.28                | 0.020   | 0.295           |
| <b>chr4:98943050-98959998_F</b>                         | chr4:98943050-98959998_F | lincRNA:chr4:98943050-98959998 forward strand                                                                                | -0.16                 | 0.047   | 1.000           | -0.28                | 0.014   | 0.250           |
| <b>Gm16510</b>                                          | XM_001473460             | ref PREDICTED: Mus musculus similar to High mobility group nucleosomal binding domain 2 (LOC100039766), mRNA [XM_001473460]  | -0.17                 | 0.048   | 1.000           | -0.35                | 0.005   | 0.152           |
| <b>Prosc</b>                                            | NM_054057                | ref Mus musculus proline synthetase co-transcribed (Prosc), transcript variant 1, mRNA [NM_054057]                           | -0.17                 | 0.044   | 1.000           | -0.22                | 0.020   | 0.302           |
| <b>Vipr1</b>                                            | NM_011703                | ref Mus musculus vasoactive intestinal peptide receptor 1 (Vipr1), mRNA [NM_011703]                                          | -0.18                 | 0.045   | 1.000           | -0.45                | 0.006   | 0.164           |
| <b>Gm13886</b>                                          | XR_034128                | ref PREDICTED: Mus musculus similar to Tardbp protein (LOC668744), misc RNA [XR_034128]                                      | -0.18                 | 0.028   | 0.983           | -0.19                | 0.033   | 0.377           |
| <b>Adk</b>                                              | NM_134079                | ref Mus musculus adenosine kinase (Adk), mRNA [NM_134079]                                                                    | -0.18                 | 0.041   | 1.000           | -0.25                | 0.042   | 0.423           |

| Online Supplemental Table IV: mG4H-Veh and Con-STZ Both |              |                                                                                                                           |                       |         |                 |                      |         |                 |
|---------------------------------------------------------|--------------|---------------------------------------------------------------------------------------------------------------------------|-----------------------|---------|-----------------|----------------------|---------|-----------------|
| Gene Symbol                                             | RefSeq       | Description                                                                                                               | logFC<br>mG4H-<br>Veh | P-value | Adj.<br>P-value | logFC<br>Con-<br>STZ | P-value | Adj.<br>P-value |
| LOC100045156                                            | XM_001473861 | ref PREDICTED: Mus musculus hypothetical protein LOC100045156 (LOC100045156), mRNA [XM_001473861]                         | -0.18                 | 0.032   | 1.000           | -0.29                | 0.005   | 0.145           |
| 5133401N09Rik                                           | NM_198004    | ref Mus musculus RIKEN cDNA 5133401N09 gene (5133401N09Rik), transcript variant 1, mRNA [NM_198004]                       | -0.18                 | 0.032   | 1.000           | -0.26                | 0.010   | 0.215           |
| Kctd9                                                   | NM_001111028 | ref Mus musculus potassium channel tetramerisation domain containing 9 (Kctd9), transcript variant 1, mRNA [NM_001111028] | -0.18                 | 0.033   | 1.000           | -0.20                | 0.019   | 0.292           |
| E430025E21Rik                                           | NM_153548    | ref Mus musculus RIKEN cDNA E430025E21 gene (E430025E21Rik), mRNA [NM_153548]                                             | -0.18                 | 0.044   | 1.000           | -0.19                | 0.049   | 0.455           |
| Nudt8                                                   | NM_025529    | ref Mus musculus nudix (nucleoside diphosphate linked moiety X)-type motif 8 (Nudt8), mRNA [NM_025529]                    | -0.18                 | 0.027   | 0.982           | -0.22                | 0.043   | 0.427           |
| Llgl2                                                   | NM_145438    | ref Mus musculus lethal giant larvae homolog 2 (Drosophila) (Llgl2), mRNA [NM_145438]                                     | -0.18                 | 0.047   | 1.000           | -0.28                | 0.014   | 0.253           |
| Itga1                                                   | NM_001033228 | ref Mus musculus integrin alpha 1 (Itga1), mRNA [NM_001033228]                                                            | -0.19                 | 0.050   | 1.000           | -0.36                | 0.004   | 0.133           |
| Tie1                                                    | NM_011587    | ref Mus musculus tyrosine kinase with immunoglobulin-like and EGF-like domains 1 (Tie1), mRNA [NM_011587]                 | -0.19                 | 0.015   | 0.832           | -0.35                | 0.006   | 0.170           |
| H2afv                                                   | NM_029938    | ref Mus musculus H2A histone family, member V (H2afv), mRNA [NM_029938]                                                   | -0.19                 | 0.021   | 0.909           | -0.31                | 0.001   | 0.077           |
| Nrbp1                                                   | NM_147201    | ref Mus musculus nuclear receptor binding protein 1 (Nrbp1), mRNA [NM_147201]                                             | -0.19                 | 0.037   | 1.000           | -0.25                | 0.019   | 0.293           |
| Gtf2h2                                                  | NM_022011    | ref Mus musculus general transcription factor II H, polypeptide 2 (Gtf2h2), mRNA [NM_022011]                              | -0.19                 | 0.026   | 0.974           | -0.21                | 0.045   | 0.441           |
| 9430020K01Rik                                           | NM_001081963 | ref Mus musculus RIKEN cDNA 9430020K01 gene (9430020K01Rik), mRNA [NM_001081963]                                          | -0.19                 | 0.025   | 0.965           | -0.28                | 0.003   | 0.126           |
| 5730469M10Rik                                           | NM_027464    | ref Mus musculus RIKEN cDNA 5730469M10 gene (5730469M10Rik), mRNA [NM_027464]                                             | -0.20                 | 0.044   | 1.000           | -0.39                | 0.001   | 0.076           |
| Gins2                                                   | NM_178856    | ref Mus musculus GINS complex subunit 2 (Psf2 homolog) (Gins2), mRNA [NM_178856]                                          | -0.20                 | 0.045   | 1.000           | -0.43                | 0.012   | 0.231           |

| Online Supplemental Table IV: mG4H-Veh and Con-STZ Both |                            |                                                                                                                                     |                       |         |                 |                      |         |                 |
|---------------------------------------------------------|----------------------------|-------------------------------------------------------------------------------------------------------------------------------------|-----------------------|---------|-----------------|----------------------|---------|-----------------|
| Gene Symbol                                             | RefSeq                     | Description                                                                                                                         | logFC<br>mG4H-<br>Veh | P-value | Adj.<br>P-value | logFC<br>Con-<br>STZ | P-value | Adj.<br>P-value |
| Gm3224                                                  | XM_001475694               | ref PREDICTED: Mus musculus hypothetical protein LOC100041238 (LOC100041238), mRNA [XM_001475694]                                   | -0.20                 | 0.015   | 0.830           | -0.21                | 0.019   | 0.290           |
| Lrrc68                                                  | NM_199149                  | ref Mus musculus leucine rich repeat containing 68 (Lrrc68), mRNA [NM_199149]                                                       | -0.20                 | 0.014   | 0.824           | -0.20                | 0.032   | 0.372           |
| Psmb8                                                   | NM_010724                  | ref Mus musculus proteasome (prosome, macropain) subunit, beta type 8 (large multifunctional peptidase 7) (Psmb8), mRNA [NM_010724] | -0.21                 | 0.042   | 1.000           | -0.29                | 0.042   | 0.425           |
| Itpka                                                   | NM_146125                  | ref Mus musculus inositol 1,4,5-trisphosphate 3-kinase A (Itpka), mRNA [NM_146125]                                                  | -0.21                 | 0.017   | 0.860           | -0.50                | 0.004   | 0.140           |
| Osbp2                                                   | NM_152818                  | ref Mus musculus oxysterol binding protein 2 (Osbp2), mRNA [NM_152818]                                                              | -0.21                 | 0.031   | 0.998           | -0.36                | 0.003   | 0.113           |
| Gm3051                                                  | XM_001476309               | ref PREDICTED: Mus musculus hypothetical protein LOC100040936 (LOC100040936), mRNA [XM_001476309]                                   | -0.21                 | 0.012   | 0.786           | -0.24                | 0.012   | 0.238           |
| Mum1                                                    | NM_023431                  | ref Mus musculus melanoma associated antigen (mutated) 1 (Mum1), mRNA [NM_023431]                                                   | -0.21                 | 0.011   | 0.782           | -0.26                | 0.014   | 0.258           |
| Hnrnpa2b1                                               | NM_182650                  | ref Mus musculus heterogeneous nuclear ribonucleoprotein A2/B1 (Hnmpa2b1), transcript variant 2, mRNA [NM_182650]                   | -0.22                 | 0.043   | 1.000           | -0.33                | 0.011   | 0.218           |
| Med22                                                   | NM_011513                  | ref Mus musculus mediator complex subunit 22 (Med22), transcript variant 1, mRNA [NM_011513]                                        | -0.22                 | 0.031   | 1.000           | -0.23                | 0.017   | 0.278           |
| Cpne4                                                   | NM_028719                  | ref Mus musculus copine IV (Cpne4), mRNA [NM_028719]                                                                                | -0.22                 | 0.037   | 1.000           | -0.26                | 0.028   | 0.349           |
| Wbscr16                                                 | NM_033572                  | ref Mus musculus Williams-Beuren syndrome chromosome region 16 homolog (human) (Wbscr16), mRNA [NM_033572]                          | -0.22                 | 0.007   | 0.677           | -0.21                | 0.029   | 0.358           |
| Rad51ap1                                                | NM_009013                  | ref Mus musculus RAD51 associated protein 1 (Rad51ap1), mRNA [NM_009013]                                                            | -0.22                 | 0.044   | 1.000           | -0.49                | 0.004   | 0.138           |
| chr6:116092274-116144199_R                              | chr6:116092274-116144199_R | lincRNA:chr6:116092274-116144199 reverse strand                                                                                     | -0.22                 | 0.027   | 0.983           | -0.21                | 0.041   | 0.420           |
| Sft2d2                                                  | NM_145512                  | ref Mus musculus SFT2 domain containing 2 (Sft2d2), mRNA [NM_145512]                                                                | -0.22                 | 0.006   | 0.661           | -0.26                | 0.009   | 0.199           |

| Online Supplemental Table IV: mG4H-Veh and Con-STZ Both |                           |                                                                                                                                    |                       |         |                 |                      |         |                 |
|---------------------------------------------------------|---------------------------|------------------------------------------------------------------------------------------------------------------------------------|-----------------------|---------|-----------------|----------------------|---------|-----------------|
| Gene Symbol                                             | RefSeq                    | Description                                                                                                                        | logFC<br>mG4H-<br>Veh | P-value | Adj.<br>P-value | logFC<br>Con-<br>STZ | P-value | Adj.<br>P-value |
| <b>Plxnb3</b>                                           | NM_019587                 | ref Mus musculus plexin B3 (Plxnb3), mRNA [NM_019587]                                                                              | -0.22                 | 0.037   | 1.000           | -0.60                | 0.003   | 0.118           |
| <b>Slc4a3</b>                                           | NM_009208                 | ref Mus musculus solute carrier family 4 (anion exchanger), member 3 (Slc4a3), mRNA [NM_009208]                                    | -0.23                 | 0.011   | 0.773           | -0.34                | 0.003   | 0.105           |
| <b>ND6</b>                                              | ENSMUST00000082419        | ens mitochondrially encoded NADH dehydrogenase 6 Gene [Source:MGI Symbol;Acc:MGI:102495] [ENSMUST00000082419]                      | -0.23                 | 0.046   | 1.000           | -0.37                | 0.026   | 0.341           |
| <b>Bend5</b>                                            | NM_026279                 | ref Mus musculus BEN domain containing 5 (Bend5), transcript variant 1, mRNA [NM_026279]                                           | -0.24                 | 0.037   | 1.000           | -0.43                | 0.038   | 0.402           |
| <b>BC004004</b>                                         | NM_030561                 | ref Mus musculus cDNA sequence BC004004 (BC004004), mRNA [NM_030561]                                                               | -0.24                 | 0.015   | 0.830           | -0.24                | 0.011   | 0.226           |
| <b>Pick1</b>                                            | NM_008837                 | ref Mus musculus protein interacting with C kinase 1 (Pick1), transcript variant 1, mRNA [NM_008837]                               | -0.24                 | 0.010   | 0.762           | -0.22                | 0.026   | 0.340           |
| <b>Abcb1b</b>                                           | NM_011075                 | ref Mus musculus ATP-binding cassette, sub-family B (MDR/TAP), member 1B (Abcb1b), mRNA [NM_011075]                                | -0.25                 | 0.019   | 0.881           | -0.31                | 0.022   | 0.310           |
| <b>Sec14l5</b>                                          | NM_001127725              | ref Mus musculus SEC14-like 5 (S. cerevisiae) (Sec14l5), mRNA [NM_001127725]                                                       | -0.25                 | 0.017   | 0.863           | -0.26                | 0.016   | 0.272           |
| <b>Rnf13</b>                                            | NM_001113413              | ref Mus musculus ring finger protein 13 (Rnf13), transcript variant 1, mRNA [NM_001113413]                                         | -0.26                 | 0.004   | 0.559           | -0.20                | 0.035   | 0.388           |
| <b>Ogdh</b>                                             | NM_010956                 | ref Mus musculus oxoglutarate dehydrogenase (lipoamide) (Ogdh), nuclear gene encoding mitochondrial protein, mRNA [NM_010956]      | -0.26                 | 0.015   | 0.826           | -0.22                | 0.037   | 0.400           |
| <b>chr16:30170306-30223193_F</b>                        | chr16:30170306-30223193_F | lincRNA:chr16:30170306-30223193 forward strand                                                                                     | -0.27                 | 0.025   | 0.957           | -0.29                | 0.030   | 0.365           |
| <b>Sort1</b>                                            | NM_019972                 | ref Mus musculus sortilin 1 (Sort1), mRNA [NM_019972]                                                                              | -0.28                 | 0.013   | 0.810           | -0.28                | 0.034   | 0.385           |
| <b>chr4:59093718-59108018_F</b>                         | chr4:59093718-59108018_F  | lincRNA:chr4:59093718-59108018 forward strand                                                                                      | -0.28                 | 0.047   | 1.000           | -0.29                | 0.027   | 0.347           |
| <b>E430024P14Rik</b>                                    | BY763003                  | gb BY763003 RIKEN full-length enriched, 2 days neonate thymus thymic cells (NOD) Mus musculus cDNA clone E430024P14 3'. [BY763003] | -0.29                 | 0.044   | 1.000           | -0.42                | 0.029   | 0.358           |
| <b>chr17:9898206-9919226_R</b>                          | chr17:9898206-9919226_R   | lincRNA:chr17:9898206-9919226 reverse strand                                                                                       | -0.29                 | 0.042   | 1.000           | -0.38                | 0.048   | 0.451           |



| Online Supplemental Table IV: mG4H-Veh and Con-STZ Both |                            |                                                                                                                           |                       |         |                 |                      |         |                 |
|---------------------------------------------------------|----------------------------|---------------------------------------------------------------------------------------------------------------------------|-----------------------|---------|-----------------|----------------------|---------|-----------------|
| Gene Symbol                                             | RefSeq                     | Description                                                                                                               | logFC<br>mG4H-<br>Veh | P-value | Adj.<br>P-value | logFC<br>Con-<br>STZ | P-value | Adj.<br>P-value |
| Paip2b                                                  | NM_146169                  | ref Mus musculus poly(A) binding protein interacting protein 2B (Paip2b), mRNA [NM_146169]                                | -0.29                 | 0.002   | 0.405           | -0.39                | 0.004   | 0.128           |
| Zfyve28                                                 | NM_001015039               | ref Mus musculus zinc finger, FYVE domain containing 28 (Zfyve28), mRNA [NM_001015039]                                    | -0.29                 | 0.033   | 1.000           | -0.30                | 0.024   | 0.327           |
| 1700022A21Rik                                           | NR_003953                  | ref Mus musculus RIKEN cDNA 1700022A21 gene (1700022A21Rik), non-coding RNA [NR_003953]                                   | -0.29                 | 0.013   | 0.808           | -0.34                | 0.036   | 0.394           |
| Lnpep                                                   | NM_172827                  | ref Mus musculus leucyl/cystinyl aminopeptidase (Lnpep), mRNA [NM_172827]                                                 | -0.29                 | 0.006   | 0.632           | -0.38                | 0.001   | 0.078           |
| Tmem52                                                  | ENSMUST00000023920         | ens transmembrane protein 52 Gene [Source:MGI (curated);Acc:MGI:1916921] [ENSMUST00000023920]                             | -0.30                 | 0.046   | 1.000           | -1.04                | 0.001   | 0.053           |
| Abcc8                                                   | NM_011510                  | ref Mus musculus ATP-binding cassette, sub-family C (CFTR/MRP), member 8 (Abcc8), mRNA [NM_011510]                        | -0.30                 | 0.002   | 0.391           | -0.46                | 0.021   | 0.306           |
| Epm2a                                                   | NM_010146                  | ref Mus musculus epilepsy, progressive myoclonic epilepsy, type 2 gene alpha (Epm2a), mRNA [NM_010146]                    | -0.30                 | 0.040   | 1.000           | -0.53                | 0.009   | 0.205           |
| chr5:111612191-111652286_F                              | chr5:111612191-111652286_F | lincRNA:chr5:111612191-111652286 forward strand                                                                           | -0.30                 | 0.027   | 0.983           | -0.23                | 0.036   | 0.395           |
| Ankdd1a                                                 | ENSMUST000000061766        | ref PREDICTED: Mus musculus ankyrin repeat and death domain containing 1A (Ankdd1a), mRNA [XM_357954]                     | -0.32                 | 0.019   | 0.883           | -0.45                | 0.003   | 0.120           |
| Tnfrsf19                                                | NM_013869                  | ref Mus musculus tumor necrosis factor receptor superfamily, member 19 (Tnfrsf19), transcript variant 1, mRNA [NM_013869] | -0.32                 | 0.042   | 1.000           | -0.44                | 0.025   | 0.334           |
| Slc46a3                                                 | NM_027872                  | ref Mus musculus solute carrier family 46, member 3 (Slc46a3), mRNA [NM_027872]                                           | -0.32                 | 0.008   | 0.705           | -0.33                | 0.049   | 0.455           |
| Bend5                                                   | NM_026279                  | ref Mus musculus BEN domain containing 5 (Bend5), transcript variant 1, mRNA [NM_026279]                                  | -0.32                 | 0.006   | 0.625           | -0.35                | 0.013   | 0.239           |
| Pilrb2                                                  | NM_001024932               | ref Mus musculus paired immunoglobulin-like type 2 receptor beta 2 (Pilrb2), mRNA [NM_001024932]                          | -0.35                 | 0.021   | 0.914           | -0.50                | 0.031   | 0.370           |
| Gm5583                                                  | XM_485851                  | ref PREDICTED: Mus musculus predicted gene, EG434109, transcript variant 1 (EG434109), mRNA [XM_485851]                   | -0.36                 | 0.038   | 1.000           | -0.52                | 0.005   | 0.154           |

| Online Supplemental Table IV: mG4H-Veh and Con-STZ Both |                           |                                                                                                           |                       |         |                 |                      |         |                 |
|---------------------------------------------------------|---------------------------|-----------------------------------------------------------------------------------------------------------|-----------------------|---------|-----------------|----------------------|---------|-----------------|
| Gene Symbol                                             | RefSeq                    | Description                                                                                               | logFC<br>mG4H-<br>Veh | P-value | Adj.<br>P-value | logFC<br>Con-<br>STZ | P-value | Adj.<br>P-value |
| chr12:56607657-56613582_F                               | chr12:56607657-56613582_F | lincRNA:chr12:56607657-56613582 forward strand                                                            | -0.37                 | 0.024   | 0.957           | -0.35                | 0.042   | 0.423           |
| Gm6458                                                  | XR_031488                 | ref PREDICTED: Mus musculus similar to Expressed sequence AI840826 (LOC623872), misc RNA [XR_031488]      | -0.38                 | 0.043   | 1.000           | -0.35                | 0.028   | 0.349           |
| ENSMUST00000100305                                      | ENSMUST00000100305        | ens helicase with zinc finger domain Gene [Source:MGI (curated);Acc:MGI:1925705] [ENSMUST00000100305]     | -0.41                 | 0.011   | 0.777           | -0.41                | 0.012   | 0.237           |
| chr9:20313342-20323517_F                                | chr9:20313342-20323517_F  | lincRNA:chr9:20313342-20323517 forward strand                                                             | -0.42                 | 0.018   | 0.878           | -0.47                | 0.008   | 0.194           |
| Sfxn2                                                   | NM_053196                 | ref Mus musculus sideroflexin 2 (Sfxn2), mRNA [NM_053196]                                                 | -0.42                 | 0.016   | 0.848           | -0.55                | 0.027   | 0.344           |
| Hoxc13                                                  | NM_010464                 | ref Mus musculus homeobox C13 (Hoxc13), mRNA [NM_010464]                                                  | -0.42                 | 0.040   | 1.000           | -0.64                | 0.006   | 0.169           |
| chr12:7530807-7866572_R                                 | chr12:7530807-7866572_R   | lincRNA:chr12:7530807-7866572 reverse strand                                                              | -0.43                 | 0.024   | 0.957           | -0.51                | 0.005   | 0.149           |
| Gm3653                                                  | XM_001477534              | ref PREDICTED: Mus musculus hypothetical protein LOC100042082 (LOC100042082), mRNA [XM_001477534]         | -0.44                 | 0.018   | 0.875           | -0.35                | 0.040   | 0.414           |
| Gpr158                                                  | NM_001004761              | ref Mus musculus G protein-coupled receptor 158 (Gpr158), mRNA [NM_001004761]                             | -0.44                 | 0.008   | 0.708           | -1.24                | 0.000   | 0.006           |
| Chrna1                                                  | NM_007389                 | ref Mus musculus cholinergic receptor, nicotinic, alpha polypeptide 1 (muscle) (Chrna1), mRNA [NM_007389] | -0.44                 | 0.003   | 0.472           | -0.44                | 0.004   | 0.140           |
| chr17:26911397-26917047_R                               | chr17:26911397-26917047_R | lincRNA:chr17:26911397-26917047 reverse strand                                                            | -0.45                 | 0.030   | 0.998           | -0.35                | 0.016   | 0.267           |
| Sla2                                                    | NM_029983                 | ref Mus musculus Src-like-adaptor 2 (Sla2), mRNA [NM_029983]                                              | -0.45                 | 0.018   | 0.873           | -0.41                | 0.032   | 0.374           |
| Tas2r129                                                | NM_207029                 | ref Mus musculus taste receptor, type 2, member 129 (Tas2r129), mRNA [NM_207029]                          | -0.46                 | 0.023   | 0.935           | -0.61                | 0.024   | 0.329           |
| Slc38a5                                                 | NM_172479                 | ref Mus musculus solute carrier family 38, member 5 (Slc38a5), mRNA [NM_172479]                           | -0.46                 | 0.047   | 1.000           | -0.91                | 0.007   | 0.182           |
| Hoxa3                                                   | NM_010452                 | ref Mus musculus homeobox A3 (Hoxa3), mRNA [NM_010452]                                                    | -0.48                 | 0.002   | 0.343           | -0.32                | 0.040   | 0.415           |

| Online Supplemental Table IV: mG4H-Veh and Con-STZ Both |                            |                                                                                                                                         |                       |         |                 |                      |         |                 |
|---------------------------------------------------------|----------------------------|-----------------------------------------------------------------------------------------------------------------------------------------|-----------------------|---------|-----------------|----------------------|---------|-----------------|
| Gene Symbol                                             | RefSeq                     | Description                                                                                                                             | logFC<br>mG4H-<br>Veh | P-value | Adj.<br>P-value | logFC<br>Con-<br>STZ | P-value | Adj.<br>P-value |
| <b>Cxx1c</b>                                            | NM_028375                  | ref Mus musculus CAAX box 1 homolog C (human) (Cxx1c), mRNA [NM_028375]                                                                 | -0.48                 | 0.002   | 0.392           | -0.41                | 0.013   | 0.245           |
| <b>chr1:162933979-162944379_F</b>                       | chr1:162933979-162944379_F | lincRNA:chr1:162933979-162944379 forward strand                                                                                         | -0.49                 | 0.027   | 0.981           | -0.47                | 0.039   | 0.412           |
| <b>Zfyve21</b>                                          | NM_026752                  | ref Mus musculus zinc finger, FYVE domain containing 21 (Zfyve21), mRNA [NM_026752]                                                     | -0.51                 | 0.000   | 0.012           | -0.36                | 0.017   | 0.280           |
| <b>Tigit</b>                                            | NM_001146325               | ref Mus musculus T cell immunoreceptor with Ig and ITIM domains (Tigit), mRNA [NM_001146325]                                            | -0.51                 | 0.043   | 1.000           | -0.49                | 0.046   | 0.444           |
| <b>chr7:48854599-48868579_F</b>                         | chr7:48854599-48868579_F   | lincRNA:chr7:48854599-48868579 forward strand                                                                                           | -0.51                 | 0.038   | 1.000           | -0.50                | 0.038   | 0.402           |
| <b>chr7:137669440-137672712_F</b>                       | chr7:137669440-137672712_F | lincRNA:chr7:137669440-137672712 forward strand                                                                                         | -0.53                 | 0.033   | 1.000           | -0.49                | 0.019   | 0.294           |
| <b>chrX:18810088-18814982_R</b>                         | chrX:18810088-18814982_R   | lincRNA:chrX:18810088-18814982 reverse strand                                                                                           | -0.55                 | 0.019   | 0.882           | -0.54                | 0.019   | 0.289           |
| <b>Rgs7bp</b>                                           | NM_029879                  | ref Mus musculus regulator of G-protein signalling 7 binding protein (Rgs7bp), mRNA [NM_029879]                                         | -0.57                 | 0.021   | 0.916           | -0.63                | 0.024   | 0.326           |
| <b>chr4:63736566-63744848_R</b>                         | chr4:63736566-63744848_R   | lincRNA:chr4:63736566-63744848 reverse strand                                                                                           | -0.58                 | 0.046   | 1.000           | -0.46                | 0.031   | 0.368           |
| <b>chr12:88235624-88264465_R</b>                        | chr12:88235624-88264465_R  | lincRNA:chr12:88235624-88264465 reverse strand                                                                                          | -0.62                 | 0.016   | 0.848           | -0.45                | 0.043   | 0.427           |
| <b>Phgr1</b>                                            | NM_001145644               | ref Mus musculus proline/histidine/glycine-rich 1 (Phgr1), mRNA [NM_001145644]                                                          | -0.63                 | 0.016   | 0.848           | -0.33                | 0.047   | 0.447           |
| <b>Ppm1k</b>                                            | NM_175523                  | ref Mus musculus protein phosphatase 1K (PP2C domain containing) (Ppm1k), nuclear gene encoding mitochondrial protein, mRNA [NM_175523] | -0.72                 | 0.000   | 0.003           | -0.26                | 0.039   | 0.412           |
| <b>Fgl1</b>                                             | BC029734                   | gb Mus musculus fibrinogen-like protein 1, mRNA (cDNA clone MGC:25810 IMAGE:4158843), complete cds. [BC029734]                          | -0.73                 | 0.029   | 0.991           | -0.45                | 0.041   | 0.421           |
| <b>E130012A19Rik</b>                                    | NM_175332                  | ref Mus musculus RIKEN cDNA E130012A19 gene (E130012A19Rik), mRNA [NM_175332]                                                           | -0.74                 | 0.000   | 0.041           | -0.72                | 0.023   | 0.320           |
| <b>Gm2127</b>                                           | XM_001472779               | ref PREDICTED: Mus musculus hypothetical protein LOC100039268 (LOC100039268), mRNA [XM_001472779]                                       | -0.89                 | 0.025   | 0.966           | -0.53                | 0.033   | 0.376           |

| Online Supplemental Table IV: mG4H-Veh and Con-STZ Both |                          |                                                                                                          |                       |         |                 |                      |         |                 |
|---------------------------------------------------------|--------------------------|----------------------------------------------------------------------------------------------------------|-----------------------|---------|-----------------|----------------------|---------|-----------------|
| Gene Symbol                                             | RefSeq                   | Description                                                                                              | logFC<br>mG4H-<br>Veh | P-value | Adj.<br>P-value | logFC<br>Con-<br>STZ | P-value | Adj.<br>P-value |
| <b>chr8:34627209-34667814_F</b>                         | chr8:34627209-34667814_F | lincRNA:chr8:34627209-34667814 forward strand                                                            | -0.93                 | 0.041   | 1.000           | -1.11                | 0.004   | 0.141           |
| <b>Gm12670</b>                                          | BG080251                 | gb H3051E04-5 NIA Mouse 15K cDNA Clone Set Mus musculus cDNA clone H3051E04 5', mRNA sequence [BG080251] | -1.21                 | 0.028   | 0.983           | -1.16                | 0.048   | 0.449           |

Online Supplemental Table IV: mG4H-STZ and Con-STZ Both

| Gene Symbol               | RefSeq                    | Description                                                                                                                               | logFC<br>Con-<br>STZ | P-value | Adj.<br>P-value | logFC<br>mG4H-<br>STZ | P-value | Adj.<br>P-value |
|---------------------------|---------------------------|-------------------------------------------------------------------------------------------------------------------------------------------|----------------------|---------|-----------------|-----------------------|---------|-----------------|
| Hmgcs2                    | NM_008256                 | ref Mus musculus 3-hydroxy-3-methylglutaryl-Coenzyme A synthase 2 (Hmgcs2), nuclear gene encoding mitochondrial protein, mRNA [NM_008256] | 3.07                 | 0.000   | 0.000           | 2.07                  | 0.000   | 0.123           |
| Hmgcs2                    | NM_008256                 | ref Mus musculus 3-hydroxy-3-methylglutaryl-Coenzyme A synthase 2 (Hmgcs2), nuclear gene encoding mitochondrial protein, mRNA [NM_008256] | 2.04                 | 0.000   | 0.000           | 1.26                  | 0.001   | 0.199           |
| Fbp2                      | NM_007994                 | ref Mus musculus fructose biphosphatase 2 (Fbp2), mRNA [NM_007994]                                                                        | 1.28                 | 0.000   | 0.000           | 0.91                  | 0.001   | 0.169           |
| chr19:36699712-36763966_R | chr19:36699712-36763966_R | lincRNA:chr19:36699712-36763966 reverse strand                                                                                            | 1.07                 | 0.000   | 0.001           | 0.77                  | 0.001   | 0.184           |
| Comt1                     | NM_001111062              | ref Mus musculus catechol-O-methyltransferase 1 (Comt1), transcript variant 1, mRNA [NM_001111062]                                        | 0.83                 | 0.000   | 0.002           | 0.53                  | 0.002   | 0.280           |
| chr19:36699712-36763966_R | chr19:36699712-36763966_R | lincRNA:chr19:36699712-36763966 reverse strand                                                                                            | 0.88                 | 0.000   | 0.002           | 0.64                  | 0.001   | 0.185           |
| Fam183b                   | NM_029283                 | ref Mus musculus family with sequence similarity 183, member B (Fam183b), transcript variant 1, mRNA [NM_029283]                          | 1.24                 | 0.000   | 0.002           | 1.30                  | 0.001   | 0.231           |
| Plin2                     | NM_007408                 | ref Mus musculus perilipin 2 (Plin2), mRNA [NM_007408]                                                                                    | 0.92                 | 0.000   | 0.003           | 0.66                  | 0.000   | 0.083           |
| Rbp7                      | NM_022020                 | ref Mus musculus retinol binding protein 7, cellular (Rbp7), mRNA [NM_022020]                                                             | 0.97                 | 0.000   | 0.003           | 0.69                  | 0.002   | 0.265           |
| Ephx1                     | NM_010145                 | ref Mus musculus epoxide hydrolase 1, microsomal (Ephx1), mRNA [NM_010145]                                                                | 0.84                 | 0.000   | 0.003           | 0.62                  | 0.001   | 0.222           |
| Hsd17b11                  | NM_053262                 | ref Mus musculus hydroxysteroid (17-beta) dehydrogenase 11 (Hsd17b11), mRNA [NM_053262]                                                   | 0.71                 | 0.000   | 0.003           | 0.50                  | 0.003   | 0.281           |
| Btnl9                     | ENSMUST00000046522        | ens butyrophilin-like 9 Gene [Source:MGI (curated);Acc:MGI:2442439] [ENSMUST00000046522]                                                  | 0.89                 | 0.000   | 0.003           | 0.63                  | 0.000   | 0.115           |
| Cldn15                    | NM_021719                 | ref Mus musculus claudin 15 (Cldn15), mRNA [NM_021719]                                                                                    | 1.41                 | 0.000   | 0.003           | 1.14                  | 0.005   | 0.349           |
| ENSMUST00000021120        | ENSMUST00000021120        | ens tripartite motif-containing 47 Gene [Source:MGI (curated);Acc:MGI:1917374] [ENSMUST00000021120]                                       | 1.08                 | 0.000   | 0.003           | 0.71                  | 0.000   | 0.064           |
| ENSMUST00000092316        | ENSMUST00000092316        | ens strawberry notch homolog 2 (Drosophila) Gene [Source:MGI Symbol;Acc:MGI:2448490] [ENSMUST00000092316]                                 | 0.92                 | 0.000   | 0.004           | 0.97                  | 0.004   | 0.310           |

Online Supplemental Table IV: mG4H-STZ and Con-STZ Both

| Gene Symbol          | RefSeq    | Description                                                                                                                                               | logFC<br>Con-<br>STZ | P-value | Adj.<br>P-value | logFC<br>mG4H-<br>STZ | P-value | Adj.<br>P-value |
|----------------------|-----------|-----------------------------------------------------------------------------------------------------------------------------------------------------------|----------------------|---------|-----------------|-----------------------|---------|-----------------|
| <b>1500017E21Rik</b> | AK005275  | gb Mus musculus adult male cerebellum cDNA, RIKEN full-length enriched library, clone:1500017E21 product:unclassifiable, full insert sequence. [AK005275] | 0.88                 | 0.000   | 0.004           | 0.58                  | 0.002   | 0.263           |
| <b>Slc38a4</b>       | NM_027052 | ref Mus musculus solute carrier family 38, member 4 (Slc38a4), mRNA [NM_027052]                                                                           | 0.69                 | 0.000   | 0.004           | 0.50                  | 0.001   | 0.183           |
| <b>Angptl4</b>       | NM_020581 | ref Mus musculus angiopoietin-like 4 (Angptl4), mRNA [NM_020581]                                                                                          | 2.44                 | 0.000   | 0.004           | 1.54                  | 0.002   | 0.270           |
| <b>Vwa3a</b>         | NM_177697 | ref Mus musculus von Willebrand factor A domain containing 3A (Vwa3a), mRNA [NM_177697]                                                                   | 1.07                 | 0.000   | 0.004           | 0.52                  | 0.001   | 0.173           |
| <b>Cyp1a1</b>        | NM_009992 | ref Mus musculus cytochrome P450, family 1, subfamily a, polypeptide 1 (Cyp1a1), transcript variant 1, mRNA [NM_009992]                                   | 2.73                 | 0.000   | 0.004           | 2.56                  | 0.001   | 0.173           |
| <b>Slc6a9</b>        | NM_008135 | ref Mus musculus solute carrier family 6 (neurotransmitter transporter, glycine), member 9 (Slc6a9), mRNA [NM_008135]                                     | 0.84                 | 0.000   | 0.004           | 0.77                  | 0.007   | 0.377           |
| <b>Npr3</b>          | NM_008728 | ref Mus musculus natriuretic peptide receptor 3 (Npr3), transcript variant 1, mRNA [NM_008728]                                                            | 0.68                 | 0.000   | 0.004           | 0.40                  | 0.034   | 0.491           |
| <b>Slc6a9</b>        | NM_008135 | ref Mus musculus solute carrier family 6 (neurotransmitter transporter, glycine), member 9 (Slc6a9), mRNA [NM_008135]                                     | 0.98                 | 0.000   | 0.004           | 0.84                  | 0.004   | 0.313           |
| <b>Tnfrsf12a</b>     | NM_013749 | ref Mus musculus tumor necrosis factor receptor superfamily, member 12a (Tnfrsf12a), transcript variant 1, mRNA [NM_013749]                               | 0.92                 | 0.000   | 0.004           | 0.46                  | 0.024   | 0.457           |
| <b>Trim47</b>        | NM_172570 | ref Mus musculus tripartite motif-containing 47 (Trim47), mRNA [NM_172570]                                                                                | 1.07                 | 0.000   | 0.004           | 0.71                  | 0.000   | 0.084           |
| <b>Dusp26</b>        | NM_025869 | ref Mus musculus dual specificity phosphatase 26 (putative) (Dusp26), mRNA [NM_025869]                                                                    | 1.17                 | 0.000   | 0.004           | 1.02                  | 0.000   | 0.148           |
| <b>Nppa</b>          | NM_008725 | ref Mus musculus natriuretic peptide precursor type A (Nppa), mRNA [NM_008725]                                                                            | 2.36                 | 0.000   | 0.004           | 1.57                  | 0.003   | 0.281           |
| <b>Gsdma</b>         | NM_021347 | ref Mus musculus gasdermin A (Gsdma), mRNA [NM_021347]                                                                                                    | 0.69                 | 0.000   | 0.005           | 0.46                  | 0.018   | 0.435           |
| <b>Ctgf</b>          | NM_010217 | ref Mus musculus connective tissue growth factor (Ctgf), mRNA [NM_010217]                                                                                 | 2.03                 | 0.000   | 0.005           | 1.58                  | 0.001   | 0.227           |



| Online Supplemental Table IV: mG4H-STZ and Con-STZ Both |                            |                                                                                                                                    |                      |         |                 |                       |         |                 |
|---------------------------------------------------------|----------------------------|------------------------------------------------------------------------------------------------------------------------------------|----------------------|---------|-----------------|-----------------------|---------|-----------------|
| Gene Symbol                                             | RefSeq                     | Description                                                                                                                        | logFC<br>Con-<br>STZ | P-value | Adj.<br>P-value | logFC<br>mG4H-<br>STZ | P-value | Adj.<br>P-value |
| Per2                                                    | NM_011066                  | ref Mus musculus period homolog 2 (Drosophila) (Per2), mRNA [NM_011066]                                                            | 1.60                 | 0.000   | 0.005           | 1.36                  | 0.011   | 0.407           |
| Txnip                                                   | NM_001009935               | ref Mus musculus thioredoxin interacting protein (Txnip), transcript variant 1, mRNA [NM_001009935]                                | 1.26                 | 0.000   | 0.005           | 1.26                  | 0.000   | 0.109           |
| ENSMUST00000107402                                      | ENSMUST00000107402         | ens RIKEN cDNA 1110036O03 gene Gene [Source:MGI Symbol;Acc:MGI:1913430] [ENSMUST00000107402]                                       | 0.82                 | 0.000   | 0.006           | 0.76                  | 0.003   | 0.281           |
| Cp                                                      | NM_007752                  | ref Mus musculus ceruloplasmin (Cp), transcript variant 2, mRNA [NM_007752]                                                        | 0.92                 | 0.000   | 0.006           | 0.77                  | 0.004   | 0.312           |
| Slc27a1                                                 | NM_011977                  | ref Mus musculus solute carrier family 27 (fatty acid transporter), member 1 (Slc27a1), mRNA [NM_011977]                           | 0.68                 | 0.000   | 0.006           | 0.52                  | 0.007   | 0.380           |
| chr10:83181374-83249774_F                               | chr10:83181374-83249774_F  | lincRNA:chr10:83181374-83249774 forward strand                                                                                     | 0.76                 | 0.000   | 0.006           | 0.31                  | 0.048   | 0.516           |
| Sphk1                                                   | NM_025367                  | ref Mus musculus sphingosine kinase 1 (Sphk1), transcript variant 2, mRNA [NM_025367]                                              | 1.13                 | 0.000   | 0.006           | 1.09                  | 0.021   | 0.449           |
| chr3:146645022-146646977_F                              | chr3:146645022-146646977_F | lincRNA:chr3:146645022-146646977 forward strand                                                                                    | 0.72                 | 0.000   | 0.006           | 0.63                  | 0.002   | 0.281           |
| Gfpt2                                                   | NM_013529                  | ref Mus musculus glutamine fructose-6-phosphate transaminase 2 (Gfpt2), mRNA [NM_013529]                                           | 0.98                 | 0.000   | 0.006           | 0.61                  | 0.003   | 0.281           |
| Ptp4a1                                                  | NM_011200                  | ref Mus musculus protein tyrosine phosphatase 4a1 (Ptp4a1), mRNA [NM_011200]                                                       | 0.70                 | 0.000   | 0.006           | 0.50                  | 0.001   | 0.222           |
| Ech1                                                    | NM_016772                  | ref Mus musculus enoyl coenzyme A hydratase 1, peroxisomal (Ech1), mRNA [NM_016772]                                                | 0.62                 | 0.000   | 0.006           | 0.53                  | 0.001   | 0.184           |
| Decr1                                                   | NM_026172                  | ref Mus musculus 2,4-dienoyl CoA reductase 1, mitochondrial (Decr1), nuclear gene encoding mitochondrial protein, mRNA [NM_026172] | 0.71                 | 0.000   | 0.007           | 0.74                  | 0.000   | 0.088           |
| Elmod3                                                  | NM_144917                  | ref Mus musculus ELMO/CED-12 domain containing 3 (Elmod3), mRNA [NM_144917]                                                        | 0.60                 | 0.000   | 0.007           | 0.44                  | 0.001   | 0.227           |
| Myc                                                     | NM_010849                  | ref Mus musculus myelocytomatosis oncogene (Myc), transcript variant 1, mRNA [NM_010849]                                           | 1.10                 | 0.000   | 0.008           | 1.07                  | 0.007   | 0.370           |
| Txnip                                                   | NM_001009935               | ref Mus musculus thioredoxin interacting protein (Txnip), transcript variant 1, mRNA [NM_001009935]                                | 1.16                 | 0.000   | 0.009           | 1.06                  | 0.000   | 0.134           |
| Cyp1b1                                                  | NM_009994                  | ref Mus musculus cytochrome P450, family 1, subfamily b, polypeptide 1 (Cyp1b1), mRNA [NM_009994]                                  | 1.65                 | 0.000   | 0.009           | 1.13                  | 0.022   | 0.452           |

| Online Supplemental Table IV: mG4H-STZ and Con-STZ Both |                           |                                                                                                                                                               |                      |         |                 |                       |         |                 |
|---------------------------------------------------------|---------------------------|---------------------------------------------------------------------------------------------------------------------------------------------------------------|----------------------|---------|-----------------|-----------------------|---------|-----------------|
| Gene Symbol                                             | RefSeq                    | Description                                                                                                                                                   | logFC<br>Con-<br>STZ | P-value | Adj.<br>P-value | logFC<br>mG4H-<br>STZ | P-value | Adj.<br>P-value |
| chr17:10057283-10075014_F                               | chr17:10057283-10075014_F | lincRNA:chr17:10057283-10075014 forward strand                                                                                                                | 1.56                 | 0.000   | 0.009           | 0.75                  | 0.019   | 0.439           |
| 6230400D17Rik                                           | AK018074                  | gb Mus musculus 11 days embryo head cDNA, RIKEN full-length enriched library, clone:6230400D17 product:hypothetical protein, full insert sequence. [AK018074] | 0.76                 | 0.000   | 0.009           | 0.72                  | 0.000   | 0.121           |
| chr15:32167516-32174427_R                               | chr15:32167516-32174427_R | lincRNA:chr15:32167516-32174427 reverse strand                                                                                                                | 0.57                 | 0.000   | 0.009           | 0.46                  | 0.001   | 0.197           |
| chr10:83181374-83249774_F                               | chr10:83181374-83249774_F | lincRNA:chr10:83181374-83249774 forward strand                                                                                                                | 0.78                 | 0.000   | 0.010           | 0.36                  | 0.044   | 0.513           |
| Ugt1a6b                                                 | NM_201410                 | ref Mus musculus UDP glucuronosyltransferase 1 family, polypeptide A6B (Ugt1a6b), mRNA [NM_201410]                                                            | 0.91                 | 0.000   | 0.010           | 0.55                  | 0.010   | 0.400           |
| Serpina3i                                               | XM_893705                 | ref PREDICTED: Mus musculus predicted gene, EG628900 (EG628900), mRNA [XM_893705]                                                                             | 1.49                 | 0.000   | 0.010           | 1.15                  | 0.031   | 0.481           |
| Tusc5                                                   | NM_177709                 | ref Mus musculus tumor suppressor candidate 5 (Tusc5), mRNA [NM_177709]                                                                                       | 0.95                 | 0.000   | 0.011           | 0.57                  | 0.007   | 0.377           |
| Enc1                                                    | NM_007930                 | ref Mus musculus ectodermal-neural cortex 1 (Enc1), mRNA [NM_007930]                                                                                          | 1.03                 | 0.000   | 0.011           | 0.81                  | 0.010   | 0.405           |
| Lipe                                                    | NM_010719                 | ref Mus musculus lipase, hormone sensitive (Lipe), transcript variant 1, mRNA [NM_010719]                                                                     | 1.04                 | 0.000   | 0.011           | 0.96                  | 0.007   | 0.372           |
| Thbs3                                                   | NM_013691                 | ref Mus musculus thrombospondin 3 (Thbs3), mRNA [NM_013691]                                                                                                   | 0.78                 | 0.000   | 0.011           | 0.33                  | 0.034   | 0.491           |
| 6430548M08Rik                                           | NM_172286                 | ref Mus musculus RIKEN cDNA 6430548M08 gene (6430548M08Rik), transcript variant 1, mRNA [NM_172286]                                                           | 0.94                 | 0.000   | 0.011           | 0.72                  | 0.000   | 0.084           |
| Gm10638                                                 | NR_027829                 | ref Mus musculus predicted gene 10638 (Gm10638), non-coding RNA [NR_027829]                                                                                   | 1.62                 | 0.000   | 0.012           | 1.46                  | 0.005   | 0.342           |
| Corin                                                   | NM_016869                 | ref Mus musculus corin (Corin), transcript variant 1, mRNA [NM_016869]                                                                                        | 0.73                 | 0.000   | 0.012           | 0.73                  | 0.002   | 0.262           |
| Adck5                                                   | NM_172960                 | ref Mus musculus aarF domain containing kinase 5 (Adck5), mRNA [NM_172960]                                                                                    | 0.62                 | 0.000   | 0.012           | 0.39                  | 0.024   | 0.461           |
| Ptp4a1                                                  | NM_011200                 | ref Mus musculus protein tyrosine phosphatase 4a1 (Ptp4a1), mRNA [NM_011200]                                                                                  | 0.71                 | 0.000   | 0.012           | 0.60                  | 0.005   | 0.338           |

Online Supplemental Table IV: mG4H-STZ and Con-STZ Both

| Gene Symbol                       | RefSeq                     | Description                                                                                                    | logFC<br>Con-<br>STZ | P-value | Adj.<br>P-value | logFC<br>mG4H-<br>STZ | P-value | Adj.<br>P-value |
|-----------------------------------|----------------------------|----------------------------------------------------------------------------------------------------------------|----------------------|---------|-----------------|-----------------------|---------|-----------------|
| <b>Arhgdig</b>                    | NM_008113                  | ref Mus musculus Rho GDP dissociation inhibitor (GDI) gamma (Arhgdig), mRNA [NM_008113]                        | 0.87                 | 0.000   | 0.013           | 0.57                  | 0.015   | 0.423           |
| <b>Ptp4a1</b>                     | NM_011200                  | ref Mus musculus protein tyrosine phosphatase 4a1 (Ptp4a1), mRNA [NM_011200]                                   | 0.72                 | 0.000   | 0.014           | 0.63                  | 0.008   | 0.389           |
| <b>Lgals3</b>                     | NM_001145953               | ref Mus musculus lectin, galactose binding, soluble 3 (Lgals3), transcript variant 1, mRNA [NM_001145953]      | 1.42                 | 0.000   | 0.014           | 1.11                  | 0.008   | 0.391           |
| <b>H19</b>                        | H19                        | lincRNA:chr7:149761435-149764019 reverse strand                                                                | 1.03                 | 0.000   | 0.014           | 1.14                  | 0.000   | 0.141           |
| <b>chr3:146645022-146646977_F</b> | chr3:146645022-146646977_F | lincRNA:chr3:146645022-146646977 forward strand                                                                | 0.66                 | 0.000   | 0.014           | 0.64                  | 0.003   | 0.306           |
| <b>Nppb</b>                       | NM_008726                  | ref Mus musculus natriuretic peptide precursor type B (Nppb), mRNA [NM_008726]                                 | 1.30                 | 0.000   | 0.015           | 0.62                  | 0.042   | 0.509           |
| <b>Gadd45g</b>                    | NM_011817                  | ref Mus musculus growth arrest and DNA-damage-inducible 45 gamma (Gadd45g), mRNA [NM_011817]                   | 0.99                 | 0.000   | 0.015           | 0.59                  | 0.015   | 0.420           |
| <b>ENSMUST00000115995</b>         | ENSMUST00000115995         | ens Putative uncharacterized protein [Source:UniProtKB/TrEMBL;Acc:Q3TRN0] [ENSMUST00000115995]                 | 0.52                 | 0.000   | 0.015           | 0.34                  | 0.039   | 0.500           |
| <b>H19</b>                        | H19                        | lincRNA:chr7:149761435-149764019 reverse strand                                                                | 1.04                 | 0.000   | 0.016           | 1.11                  | 0.000   | 0.153           |
| <b>Sgk1</b>                       | NM_001161845               | ref Mus musculus serum/glucocorticoid regulated kinase 1 (Sgk1), transcript variant 1, mRNA [NM_001161845]     | 0.95                 | 0.000   | 0.016           | 0.91                  | 0.001   | 0.240           |
| <b>Fibin</b>                      | NM_026271                  | ref Mus musculus fin bud initiation factor homolog (zebrafish) (Fibin), mRNA [NM_026271]                       | 0.64                 | 0.000   | 0.017           | 0.57                  | 0.003   | 0.288           |
| <b>chr3:146629425-146649125_F</b> | chr3:146629425-146649125_F | lincRNA:chr3:146629425-146649125 forward strand                                                                | 0.71                 | 0.000   | 0.017           | 0.64                  | 0.001   | 0.227           |
| <b>Gpx3</b>                       | NM_008161                  | ref Mus musculus glutathione peroxidase 3 (Gpx3), transcript variant 2, mRNA [NM_008161]                       | 0.81                 | 0.000   | 0.017           | 0.79                  | 0.001   | 0.210           |
| <b>Chkb</b>                       | NM_007692                  | ref Mus musculus choline kinase beta (Chkb), mRNA [NM_007692]                                                  | 0.49                 | 0.000   | 0.017           | 0.41                  | 0.019   | 0.439           |
| <b>Twist2</b>                     | NM_007855                  | ref Mus musculus twist homolog 2 (Drosophila) (Twist2), mRNA [NM_007855]                                       | 0.57                 | 0.000   | 0.017           | 0.46                  | 0.010   | 0.403           |
| <b>Arid5a</b>                     | NM_001172205               | ref Mus musculus AT rich interactive domain 5A (MRF1-like) (Arid5a), transcript variant 1, mRNA [NM_001172205] | 1.42                 | 0.000   | 0.017           | 1.10                  | 0.001   | 0.222           |

| Online Supplemental Table IV: mG4H-STZ and Con-STZ Both |                            |                                                                                                                                            |                      |         |                 |                       |         |                 |
|---------------------------------------------------------|----------------------------|--------------------------------------------------------------------------------------------------------------------------------------------|----------------------|---------|-----------------|-----------------------|---------|-----------------|
| Gene Symbol                                             | RefSeq                     | Description                                                                                                                                | logFC<br>Con-<br>STZ | P-value | Adj.<br>P-value | logFC<br>mG4H-<br>STZ | P-value | Adj.<br>P-value |
| <b>Adamts1</b>                                          | NM_009621                  | ref Mus musculus a disintegrin-like and metallopeptidase (reprolysin type) with thrombospondin type 1 motif, 1 (Adamts1), mRNA [NM_009621] | 0.87                 | 0.000   | 0.017           | 0.79                  | 0.003   | 0.288           |
| <b>Tgfb2</b>                                            | NM_009367                  | ref Mus musculus transforming growth factor, beta 2 (Tgfb2), mRNA [NM_009367]                                                              | 0.96                 | 0.000   | 0.017           | 0.56                  | 0.023   | 0.453           |
| <b>H19</b>                                              | NR_001592                  | ref Mus musculus H19 fetal liver mRNA (H19), non-coding RNA [NR_001592]                                                                    | 1.09                 | 0.000   | 0.018           | 1.19                  | 0.000   | 0.088           |
| <b>Cpt1a</b>                                            | NM_013495                  | ref Mus musculus carnitine palmitoyltransferase 1a, liver (Cpt1a), nuclear gene encoding mitochondrial protein, mRNA [NM_013495]           | 0.61                 | 0.000   | 0.019           | 0.41                  | 0.010   | 0.401           |
| <b>Adam8</b>                                            | NM_007403                  | ref Mus musculus a disintegrin and metallopeptidase domain 8 (Adam8), mRNA [NM_007403]                                                     | 1.87                 | 0.000   | 0.019           | 1.52                  | 0.028   | 0.474           |
| <b>Rab15</b>                                            | NM_134050                  | ref Mus musculus RAB15, member RAS oncogene family (Rab15), mRNA [NM_134050]                                                               | 1.10                 | 0.000   | 0.019           | 0.65                  | 0.003   | 0.297           |
| <b>Tmtc1</b>                                            | NM_198967                  | ref Mus musculus transmembrane and tetratricopeptide repeat containing 1 (Tmtc1), mRNA [NM_198967]                                         | 0.73                 | 0.000   | 0.019           | 0.80                  | 0.002   | 0.262           |
| <b>chr3:146629425-146649125_F</b>                       | chr3:146629425-146649125_F | lincRNA:chr3:146629425-146649125 forward strand                                                                                            | 0.76                 | 0.000   | 0.019           | 0.68                  | 0.002   | 0.264           |
| <b>Rbm3</b>                                             | NM_001166410               | ref Mus musculus RNA binding motif protein 3 (Rbm3), transcript variant 3, mRNA [NM_001166410]                                             | 0.51                 | 0.000   | 0.020           | 0.66                  | 0.013   | 0.412           |
| <b>Cat</b>                                              | NM_009804                  | ref Mus musculus catalase (Cat), mRNA [NM_009804]                                                                                          | 0.66                 | 0.000   | 0.020           | 0.53                  | 0.009   | 0.398           |
| <b>LOC100046468</b>                                     | XM_001477130               | ref PREDICTED: Mus musculus hypothetical protein LOC100046468 (LOC100046468), mRNA [XM_001477130]                                          | 0.57                 | 0.000   | 0.021           | 0.44                  | 0.001   | 0.184           |
| <b>Serpina3n</b>                                        | NM_009252                  | ref Mus musculus serine (or cysteine) peptidase inhibitor, clade A, member 3N (Serpina3n), mRNA [NM_009252]                                | 2.10                 | 0.000   | 0.021           | 1.60                  | 0.029   | 0.477           |
| <b>Grn</b>                                              | NM_008175                  | ref Mus musculus granulin (Gm), mRNA [NM_008175]                                                                                           | 0.66                 | 0.000   | 0.021           | 0.51                  | 0.016   | 0.428           |
| <b>chr3:146645022-146646977_F</b>                       | chr3:146645022-146646977_F | lincRNA:chr3:146645022-146646977 forward strand                                                                                            | 0.69                 | 0.000   | 0.021           | 0.58                  | 0.003   | 0.290           |
| <b>Elmod3</b>                                           | NM_144917                  | ref Mus musculus ELMO/CED-12 domain containing 3 (Elmod3), mRNA [NM_144917]                                                                | 0.58                 | 0.000   | 0.021           | 0.47                  | 0.001   | 0.208           |
| <b>Sphk1</b>                                            | NM_001172472               | ref Mus musculus sphingosine kinase 1 (Sphk1), transcript variant 4, mRNA [NM_001172472]                                                   | 0.97                 | 0.000   | 0.022           | 0.98                  | 0.036   | 0.495           |

Online Supplemental Table IV: mG4H-STZ and Con-STZ Both

| Gene Symbol                       | RefSeq                     | Description                                                                                                   | logFC<br>Con-<br>STZ | P-value | Adj.<br>P-value | logFC<br>mG4H-<br>STZ | P-value | Adj.<br>P-value |
|-----------------------------------|----------------------------|---------------------------------------------------------------------------------------------------------------|----------------------|---------|-----------------|-----------------------|---------|-----------------|
| <b>Itih4</b>                      | NM_018746                  | ref Mus musculus inter alpha-trypsin inhibitor, heavy chain 4 (Itih4), transcript variant 1, mRNA [NM_018746] | 1.03                 | 0.000   | 0.023           | 0.53                  | 0.034   | 0.491           |
| <b>Ehd4</b>                       | NM_133838                  | ref Mus musculus EH-domain containing 4 (Ehd4), mRNA [NM_133838]                                              | 0.54                 | 0.000   | 0.023           | 0.65                  | 0.002   | 0.266           |
| <b>chr3:146515333-146557069_F</b> | chr3:146515333-146557069_F | lincRNA:chr3:146515333-146557069 forward strand                                                               | 0.82                 | 0.000   | 0.023           | 0.77                  | 0.003   | 0.281           |
| <b>Carhsp1</b>                    | NM_025821                  | ref Mus musculus calcium regulated heat stable protein 1 (Carhsp1), mRNA [NM_025821]                          | 0.56                 | 0.000   | 0.023           | 0.37                  | 0.025   | 0.463           |
| <b>Lrrc36</b>                     | NM_001170788               | ref Mus musculus leucine rich repeat containing 36 (Lrrc36), transcript variant 1, mRNA [NM_001170788]        | 0.67                 | 0.000   | 0.024           | 0.40                  | 0.013   | 0.412           |
| <b>Fstl3</b>                      | NM_031380                  | ref Mus musculus follistatin-like 3 (Fstl3), mRNA [NM_031380]                                                 | 1.03                 | 0.000   | 0.024           | 0.59                  | 0.016   | 0.426           |
| <b>Me1</b>                        | NM_008615                  | ref Mus musculus malic enzyme 1, NADP(+)-dependent, cytosolic (Me1), mRNA [NM_008615]                         | 0.47                 | 0.000   | 0.024           | 0.41                  | 0.008   | 0.393           |
| <b>Scarb2</b>                     | NM_007644                  | ref Mus musculus scavenger receptor class B, member 2 (Scarb2), mRNA [NM_007644]                              | 0.47                 | 0.000   | 0.024           | 0.37                  | 0.005   | 0.354           |
| <b>Ccl9</b>                       | NM_011338                  | ref Mus musculus chemokine (C-C motif) ligand 9 (Ccl9), mRNA [NM_011338]                                      | 1.11                 | 0.000   | 0.024           | 0.63                  | 0.027   | 0.471           |
| <b>Fgd3</b>                       | ENSMUST00000110087         | ens FYVE, RhoGEF and PH domain containing 3 Gene [Source:MGI (curated);Acc:MGI:1353657] [ENSMUST00000110087]  | 0.60                 | 0.000   | 0.024           | 0.39                  | 0.006   | 0.356           |
| <b>Crll1</b>                      | NM_018827                  | ref Mus musculus cytokine receptor-like factor 1 (Crll1), mRNA [NM_018827]                                    | 1.54                 | 0.000   | 0.024           | 1.08                  | 0.013   | 0.412           |
| <b>Rasgef1b</b>                   | NM_145839                  | ref Mus musculus RasGEF domain family, member 1B (Rasgef1b), transcript variant 1, mRNA [NM_145839]           | 1.17                 | 0.000   | 0.025           | 0.96                  | 0.041   | 0.504           |
| <b>Spink10</b>                    | NM_177829                  | ref Mus musculus serine peptidase inhibitor, Kazal type 10 (Spink10), mRNA [NM_177829]                        | 1.22                 | 0.000   | 0.025           | 1.25                  | 0.000   | 0.151           |
| <b>ENSMUST00000098762</b>         | ENSMUST00000098762         | ens RIKEN cDNA 1700095B22 gene Gene [Source:MGI Symbol;Acc:MGI:1925885] [ENSMUST00000098762]                  | 0.70                 | 0.000   | 0.025           | 0.70                  | 0.005   | 0.354           |
| <b>Fam105b</b>                    | NM_001013792               | ref Mus musculus family with sequence similarity 105, member B (Fam105b), mRNA [NM_001013792]                 | 0.72                 | 0.000   | 0.026           | 0.45                  | 0.014   | 0.412           |

| Online Supplemental Table IV: mG4H-STZ and Con-STZ Both |              |                                                                                                                                                     |                      |         |                 |                       |         |                 |
|---------------------------------------------------------|--------------|-----------------------------------------------------------------------------------------------------------------------------------------------------|----------------------|---------|-----------------|-----------------------|---------|-----------------|
| Gene Symbol                                             | RefSeq       | Description                                                                                                                                         | logFC<br>Con-<br>STZ | P-value | Adj.<br>P-value | logFC<br>mG4H-<br>STZ | P-value | Adj.<br>P-value |
| <b>Lgals4</b>                                           | NM_010706    | ref Mus musculus lectin, galactose binding, soluble 4 (Lgals4), mRNA [NM_010706]                                                                    | 0.78                 | 0.000   | 0.026           | 0.45                  | 0.009   | 0.396           |
| <b>Me1</b>                                              | NM_008615    | ref Mus musculus malic enzyme 1, NADP(+)-dependent, cytosolic (Me1), mRNA [NM_008615]                                                               | 0.45                 | 0.000   | 0.026           | 0.32                  | 0.012   | 0.412           |
| <b>Pitpnm1</b>                                          | NM_001136078 | ref Mus musculus phosphatidylinositol transfer protein, membrane-associated 1 (Pitpnm1), transcript variant 2, mRNA [NM_001136078]                  | 0.46                 | 0.000   | 0.027           | 0.47                  | 0.019   | 0.440           |
| <b>4831440E17Rik</b>                                    | NR_030700    | ref Mus musculus RIKEN cDNA 4831440E17 gene (4831440E17Rik), non-coding RNA [NR_030700]                                                             | 0.70                 | 0.000   | 0.027           | 0.44                  | 0.017   | 0.429           |
| <b>Thbs3</b>                                            | NM_013691    | ref Mus musculus thrombospondin 3 (Thbs3), mRNA [NM_013691]                                                                                         | 0.78                 | 0.000   | 0.027           | 0.36                  | 0.028   | 0.474           |
| <b>H19</b>                                              | H19          | lincRNA:chr7:149761435-149764019 reverse strand                                                                                                     | 1.08                 | 0.000   | 0.028           | 1.12                  | 0.000   | 0.160           |
| <b>H19</b>                                              | H19          | lincRNA:chr7:149761435-149764019 reverse strand                                                                                                     | 0.95                 | 0.000   | 0.028           | 1.03                  | 0.001   | 0.167           |
| <b>Tuba1c</b>                                           | NM_009448    | ref Mus musculus tubulin, alpha 1C (Tuba1c), mRNA [NM_009448]                                                                                       | 0.63                 | 0.000   | 0.028           | 0.45                  | 0.013   | 0.412           |
| <b>Fads3</b>                                            | NM_021890    | ref Mus musculus fatty acid desaturase 3 (Fads3), mRNA [NM_021890]                                                                                  | 0.50                 | 0.000   | 0.028           | 0.29                  | 0.038   | 0.499           |
| <b>H19</b>                                              | H19          | lincRNA:chr7:149761435-149764019 reverse strand                                                                                                     | 1.02                 | 0.000   | 0.028           | 1.18                  | 0.001   | 0.167           |
| <b>Cat</b>                                              | NM_009804    | ref Mus musculus catalase (Cat), mRNA [NM_009804]                                                                                                   | 0.73                 | 0.000   | 0.028           | 0.65                  | 0.005   | 0.346           |
| <b>Gm3448</b>                                           | NM_001123367 | ref Mus musculus predicted gene 3448 (Gm3448), mRNA [NM_001123367]                                                                                  | 0.71                 | 0.000   | 0.028           | 0.67                  | 0.001   | 0.222           |
| <b>Gm428</b>                                            | NM_001081644 | ref Mus musculus predicted gene 428 (Gm428), mRNA [NM_001081644]                                                                                    | 0.48                 | 0.000   | 0.028           | 0.52                  | 0.001   | 0.222           |
| <b>Nrap</b>                                             | NM_008733    | ref Mus musculus nebulin-related anchoring protein (Nrap), transcript variant 2, mRNA [NM_008733]                                                   | 0.50                 | 0.000   | 0.028           | 0.33                  | 0.030   | 0.477           |
| <b>Elovl1</b>                                           | NM_001039176 | ref Mus musculus elongation of very long chain fatty acids (FEN1/Elo2, SUR4/Elo3, yeast)-like 1 (Elovl1), transcript variant 1, mRNA [NM_001039176] | 0.54                 | 0.000   | 0.028           | 0.35                  | 0.016   | 0.426           |
| <b>Tiam2</b>                                            | NM_011878    | ref Mus musculus T-cell lymphoma invasion and metastasis 2 (Tiam2), transcript variant 1, mRNA [NM_011878]                                          | 0.75                 | 0.000   | 0.028           | 0.40                  | 0.019   | 0.441           |
| <b>Plaur</b>                                            | NM_011113    | ref Mus musculus plasminogen activator, urokinase receptor (Plaur), mRNA [NM_011113]                                                                | 0.79                 | 0.000   | 0.028           | 1.02                  | 0.002   | 0.253           |



| Online Supplemental Table IV: mG4H-STZ and Con-STZ Both |                          |                                                                                                                                                       |                      |         |                 |                       |         |                 |
|---------------------------------------------------------|--------------------------|-------------------------------------------------------------------------------------------------------------------------------------------------------|----------------------|---------|-----------------|-----------------------|---------|-----------------|
| Gene Symbol                                             | RefSeq                   | Description                                                                                                                                           | logFC<br>Con-<br>STZ | P-value | Adj.<br>P-value | logFC<br>mG4H-<br>STZ | P-value | Adj.<br>P-value |
| <b>Chi3l3</b>                                           | NM_009892                | ref Mus musculus chitinase 3-like 3 (Chi3l3), mRNA [NM_009892]                                                                                        | 1.37                 | 0.000   | 0.029           | 1.63                  | 0.002   | 0.257           |
| <b>Prg4</b>                                             | NM_021400                | ref Mus musculus proteoglycan 4 (megakaryocyte stimulating factor, articular superficial zone protein) (Prg4), transcript variant 1, mRNA [NM_021400] | 1.76                 | 0.000   | 0.029           | 1.34                  | 0.049   | 0.519           |
| <b>Flnc</b>                                             | NM_001081185             | ref Mus musculus filamin C, gamma (Flnc), mRNA [NM_001081185]                                                                                         | 0.47                 | 0.000   | 0.029           | 0.29                  | 0.014   | 0.414           |
| <b>Btnl9</b>                                            | NM_172793                | ref Mus musculus butyrophilin-like 9 (Btnl9), mRNA [NM_172793]                                                                                        | 0.81                 | 0.000   | 0.029           | 0.65                  | 0.000   | 0.084           |
| <b>Ear12</b>                                            | NM_001012766             | ref Mus musculus eosinophil-associated, ribonuclease A family, member 12 (Ear12), mRNA [NM_001012766]                                                 | 0.97                 | 0.000   | 0.029           | 1.29                  | 0.010   | 0.403           |
| <b>Me1</b>                                              | NM_008615                | ref Mus musculus malic enzyme 1, NADP(+)-dependent, cytosolic (Me1), mRNA [NM_008615]                                                                 | 0.44                 | 0.000   | 0.029           | 0.34                  | 0.010   | 0.401           |
| <b>Clec4d</b>                                           | NM_010819                | ref Mus musculus C-type lectin domain family 4, member d (Clec4d), transcript variant 1, mRNA [NM_010819]                                             | 1.84                 | 0.000   | 0.029           | 1.71                  | 0.019   | 0.441           |
| <b>Gpr160</b>                                           | NM_001134385             | ref Mus musculus G protein-coupled receptor 160 (Gpr160), transcript variant 1, mRNA [NM_001134385]                                                   | 1.49                 | 0.000   | 0.029           | 1.09                  | 0.012   | 0.408           |
| <b>chr3:30754871-30776438_F</b>                         | chr3:30754871-30776438_F | lincRNA:chr3:30754871-30776438 forward strand                                                                                                         | 0.79                 | 0.000   | 0.029           | 0.71                  | 0.026   | 0.470           |
| <b>Kirrel</b>                                           | NM_001170985             | ref Mus musculus kin of IRRE like (Drosophila) (Kirrel), transcript variant 1, mRNA [NM_001170985]                                                    | 0.39                 | 0.000   | 0.029           | 0.28                  | 0.043   | 0.510           |
| <b>Gm13105</b>                                          | XM_001475876             | ref PREDICTED: Mus musculus similar to pol protein (LOC100041144), mRNA [XM_001475876]                                                                | 1.65                 | 0.000   | 0.029           | 1.33                  | 0.031   | 0.482           |
| <b>Aldh16a1</b>                                         | NM_145954                | ref Mus musculus aldehyde dehydrogenase 16 family, member A1 (Aldh16a1), mRNA [NM_145954]                                                             | 0.41                 | 0.000   | 0.029           | 0.35                  | 0.011   | 0.406           |
| <b>ENSMUST00000114270</b>                               | ENSMUST00000114270       | ens docking protein 7 Gene [Source:MGI (curated);Acc:MGI:3584043] [ENSMUST00000114270]                                                                | 0.53                 | 0.000   | 0.030           | 0.36                  | 0.014   | 0.414           |
| <b>ENSMUST00000066583</b>                               | ENSMUST00000066583       | ens Putative uncharacterized protein Fragment [Source:UniProtKB/TrEMBL;Acc:Q8CBC5] [ENSMUST00000066583]                                               | 0.84                 | 0.000   | 0.030           | 0.41                  | 0.040   | 0.504           |
| <b>Cxcr6</b>                                            | NM_030712                | ref Mus musculus chemokine (C-X-C motif) receptor 6 (Cxcr6), mRNA [NM_030712]                                                                         | 1.41                 | 0.000   | 0.030           | 1.02                  | 0.016   | 0.428           |

| Online Supplemental Table IV: mG4H-STZ and Con-STZ Both |                           |                                                                                                                                   |                      |         |                 |                       |         |                 |
|---------------------------------------------------------|---------------------------|-----------------------------------------------------------------------------------------------------------------------------------|----------------------|---------|-----------------|-----------------------|---------|-----------------|
| Gene Symbol                                             | RefSeq                    | Description                                                                                                                       | logFC<br>Con-<br>STZ | P-value | Adj.<br>P-value | logFC<br>mG4H-<br>STZ | P-value | Adj.<br>P-value |
| Gm3992                                                  | XM_001478693              | ref PREDICTED: Mus musculus similar to Discs, large homolog-associated protein 4 (Drosophila) (LOC100042726), mRNA [XM_001478693] | 0.45                 | 0.000   | 0.030           | 0.41                  | 0.019   | 0.441           |
| Tacc2                                                   | NM_001004468              | ref Mus musculus transforming, acidic coiled-coil containing protein 2 (Tacc2), transcript variant 3, mRNA [NM_001004468]         | 0.94                 | 0.000   | 0.031           | 0.71                  | 0.003   | 0.303           |
| Abca6                                                   | NM_147218                 | ref Mus musculus ATP-binding cassette, sub-family A (ABC1), member 6 (Abca6), transcript variant 1, mRNA [NM_147218]              | 0.58                 | 0.000   | 0.031           | 0.52                  | 0.002   | 0.257           |
| chr15:32167516-32174417_R                               | chr15:32167516-32174417_R | lincRNA:chr15:32167516-32174417 reverse strand                                                                                    | 0.56                 | 0.000   | 0.032           | 0.37                  | 0.016   | 0.428           |
| Cd63                                                    | NM_001042580              | ref Mus musculus CD63 antigen (Cd63), transcript variant 1, mRNA [NM_001042580]                                                   | 0.47                 | 0.000   | 0.032           | 0.27                  | 0.014   | 0.416           |
| Cd300lg                                                 | NM_001160711              | ref Mus musculus CD300 antigen like family member G (Cd300lg), transcript variant 1, mRNA [NM_001160711]                          | 0.52                 | 0.000   | 0.032           | 0.41                  | 0.025   | 0.467           |
| Lman1l                                                  | NM_199222                 | ref Mus musculus lectin, mannose-binding 1 like (Lman1l), mRNA [NM_199222]                                                        | 0.94                 | 0.000   | 0.033           | 0.62                  | 0.016   | 0.425           |
| Atp6v1h                                                 | NM_133826                 | ref Mus musculus ATPase, H <sup>+</sup> transporting, lysosomal V1 subunit H (Atp6v1h), mRNA [NM_133826]                          | 0.43                 | 0.000   | 0.034           | 0.24                  | 0.044   | 0.513           |
| Sbno2                                                   | NM_183426                 | ref Mus musculus strawberry notch homolog 2 (Drosophila) (Sbno2), mRNA [NM_183426]                                                | 0.59                 | 0.000   | 0.034           | 0.44                  | 0.007   | 0.383           |
| Ptp4a1                                                  | NM_011200                 | ref Mus musculus protein tyrosine phosphatase 4a1 (Ptp4a1), mRNA [NM_011200]                                                      | 0.73                 | 0.000   | 0.034           | 0.58                  | 0.007   | 0.374           |
| Cp                                                      | NM_001042611              | ref Mus musculus ceruloplasmin (Cp), transcript variant 1, mRNA [NM_001042611]                                                    | 0.56                 | 0.000   | 0.034           | 0.53                  | 0.010   | 0.403           |
| Tmem212                                                 | NM_001164437              | ref Mus musculus transmembrane protein 212 (Tmem212), mRNA [NM_001164437]                                                         | 0.68                 | 0.000   | 0.034           | 0.79                  | 0.011   | 0.406           |
| chr13:21856097-21859200_R                               | chr13:21856097-21859200_R | lincRNA:chr13:21856097-21859200 reverse strand                                                                                    | 2.01                 | 0.000   | 0.035           | 1.56                  | 0.023   | 0.453           |
| Rod1                                                    | NM_144904                 | ref Mus musculus ROD1 regulator of differentiation 1 (S. pombe) (Rod1), transcript variant 1, mRNA [NM_144904]                    | 0.42                 | 0.000   | 0.035           | 0.56                  | 0.030   | 0.478           |
| LOC669787                                               | XM_001473812              | ref PREDICTED: Mus musculus similar to avena1 (LOC669787), mRNA [XM_001473812]                                                    | 0.47                 | 0.000   | 0.035           | 0.38                  | 0.011   | 0.406           |

| Online Supplemental Table IV: mG4H-STZ and Con-STZ Both |                            |                                                                                                                                                                                                                               |                      |         |                 |                       |         |                 |
|---------------------------------------------------------|----------------------------|-------------------------------------------------------------------------------------------------------------------------------------------------------------------------------------------------------------------------------|----------------------|---------|-----------------|-----------------------|---------|-----------------|
| Gene Symbol                                             | RefSeq                     | Description                                                                                                                                                                                                                   | logFC<br>Con-<br>STZ | P-value | Adj.<br>P-value | logFC<br>mG4H-<br>STZ | P-value | Adj.<br>P-value |
| <b>Des</b>                                              | NM_010043                  | ref Mus musculus desmin (Des), mRNA [NM_010043]                                                                                                                                                                               | 0.49                 | 0.000   | 0.035           | 0.42                  | 0.021   | 0.448           |
| <b>Tpbg</b>                                             | NM_011627                  | ref Mus musculus trophoblast glycoprotein (Tpbg), transcript variant 1, mRNA [NM_011627]                                                                                                                                      | 0.82                 | 0.000   | 0.035           | 0.61                  | 0.038   | 0.499           |
| <b>Ptp4a3</b>                                           | NM_008975                  | ref Mus musculus protein tyrosine phosphatase 4a3 (Ptp4a3), transcript variant 2, mRNA [NM_008975]                                                                                                                            | 0.53                 | 0.000   | 0.035           | 0.48                  | 0.007   | 0.382           |
| <b>Hyi</b>                                              | NM_026601                  | ref Mus musculus hydroxypyruvate isomerase homolog (E. coli) (Hyi), mRNA [NM_026601]                                                                                                                                          | 0.56                 | 0.000   | 0.035           | 0.41                  | 0.018   | 0.435           |
| <b>Aldh1a1</b>                                          | NM_013467                  | ref Mus musculus aldehyde dehydrogenase family 1, subfamily A1 (Aldh1a1), mRNA [NM_013467]                                                                                                                                    | 0.73                 | 0.000   | 0.035           | 0.62                  | 0.034   | 0.493           |
| <b>chr5:107504871-107507830_F</b>                       | chr5:107504871-107507830_F | lincRNA:chr5:107504871-107507830 forward strand                                                                                                                                                                               | 0.70                 | 0.000   | 0.036           | 0.68                  | 0.004   | 0.325           |
| <b>Gstm1</b>                                            | NM_010358                  | ref Mus musculus glutathione S-transferase, mu 1 (Gstm1), mRNA [NM_010358]                                                                                                                                                    | 0.50                 | 0.000   | 0.036           | 0.47                  | 0.015   | 0.422           |
| <b>Aox1</b>                                             | NM_009676                  | ref Mus musculus aldehyde oxidase 1 (Aox1), mRNA [NM_009676]                                                                                                                                                                  | 0.65                 | 0.000   | 0.036           | 0.56                  | 0.006   | 0.365           |
| <b>1810022C23Rik</b>                                    | NM_026947                  | ref Mus musculus RIKEN cDNA 1810022C23 gene (1810022C23Rik), mRNA [NM_026947]                                                                                                                                                 | 0.48                 | 0.000   | 0.037           | 0.39                  | 0.007   | 0.377           |
| <b>chr1:183783306-183834531_R</b>                       | chr1:183783306-183834531_R | lincRNA:chr1:183783306-183834531 reverse strand                                                                                                                                                                               | 0.70                 | 0.000   | 0.037           | 0.61                  | 0.011   | 0.406           |
| <b>Tcf23</b>                                            | NM_053085                  | ref Mus musculus transcription factor 23 (Tcf23), mRNA [NM_053085]                                                                                                                                                            | 1.59                 | 0.000   | 0.037           | 1.25                  | 0.008   | 0.389           |
| <b>Lta</b>                                              | NM_010735                  | ref Mus musculus lymphotoxin A (Lta), mRNA [NM_010735]                                                                                                                                                                        | 0.53                 | 0.000   | 0.037           | 0.70                  | 0.028   | 0.474           |
| <b>Hadha</b>                                            | NM_178878                  | ref Mus musculus hydroxyacyl-Coenzyme A dehydrogenase/3-ketoacyl-Coenzyme A thiolase/enoyl-Coenzyme A hydratase (trifunctional protein), alpha subunit (Hadha), nuclear gene encoding mitochondrial protein, mRNA [NM_178878] | 0.49                 | 0.000   | 0.037           | 0.39                  | 0.019   | 0.440           |
| <b>Tgm3</b>                                             | NM_009374                  | ref Mus musculus transglutaminase 3, E polypeptide (Tgm3), mRNA [NM_009374]                                                                                                                                                   | 0.76                 | 0.000   | 0.037           | 0.61                  | 0.005   | 0.354           |
| <b>Procr</b>                                            | NM_011171                  | ref Mus musculus protein C receptor, endothelial (Procr), mRNA [NM_011171]                                                                                                                                                    | 0.68                 | 0.000   | 0.037           | 0.59                  | 0.022   | 0.452           |

Online Supplemental Table IV: mG4H-STZ and Con-STZ Both

| Gene Symbol                | RefSeq                     | Description                                                                                                                          | logFC<br>Con-<br>STZ | P-value | Adj.<br>P-value | logFC<br>mG4H-<br>STZ | P-value | Adj.<br>P-value |
|----------------------------|----------------------------|--------------------------------------------------------------------------------------------------------------------------------------|----------------------|---------|-----------------|-----------------------|---------|-----------------|
| Osmr                       | NM_011019                  | ref Mus musculus oncostatin M receptor (Osmr), mRNA [NM_011019]                                                                      | 0.79                 | 0.000   | 0.038           | 0.40                  | 0.030   | 0.480           |
| chr1:183783306-183834531_R | chr1:183783306-183834531_R | lincRNA:chr1:183783306-183834531 reverse strand                                                                                      | 0.68                 | 0.000   | 0.039           | 0.62                  | 0.009   | 0.398           |
| Cxcr6                      | NM_030712                  | ref Mus musculus chemokine (C-X-C motif) receptor 6 (Cxcr6), mRNA [NM_030712]                                                        | 1.33                 | 0.000   | 0.039           | 0.90                  | 0.041   | 0.505           |
| Gm11758                    | NM_001097978               | ref Mus musculus predicted gene 11758 (Gm11758), mRNA [NM_001097978]                                                                 | 0.49                 | 0.000   | 0.039           | 0.51                  | 0.005   | 0.353           |
| Agt                        | NM_007428                  | ref Mus musculus angiotensinogen (serpin peptidase inhibitor, clade A, member 8) (Agt), mRNA [NM_007428]                             | 1.36                 | 0.000   | 0.039           | 1.34                  | 0.009   | 0.398           |
| Eli2                       | NM_138953                  | ref Mus musculus elongation factor RNA polymerase II 2 (Eli2), mRNA [NM_138953]                                                      | 0.58                 | 0.000   | 0.040           | 0.51                  | 0.006   | 0.366           |
| Lyve1                      | NM_053247                  | ref Mus musculus lymphatic vessel endothelial hyaluronan receptor 1 (Lyve1), mRNA [NM_053247]                                        | 0.99                 | 0.000   | 0.040           | 0.79                  | 0.022   | 0.453           |
| Gldc                       | NM_138595                  | ref Mus musculus glycine decarboxylase (Gldc), nuclear gene encoding mitochondrial protein, mRNA [NM_138595]                         | 1.05                 | 0.000   | 0.040           | 0.81                  | 0.019   | 0.437           |
| Ccl6                       | NM_009139                  | ref Mus musculus chemokine (C-C motif) ligand 6 (Ccl6), mRNA [NM_009139]                                                             | 1.35                 | 0.000   | 0.041           | 0.97                  | 0.019   | 0.437           |
| Gm2627                     | XM_001474216               | ref PREDICTED: Mus musculus similar to gag protein (LOC100040148), mRNA [XM_001474216]                                               | 1.76                 | 0.000   | 0.041           | 1.38                  | 0.019   | 0.439           |
| Zfp352                     | NM_153102                  | ref Mus musculus zinc finger protein 352 (Zfp352), mRNA [NM_153102]                                                                  | 0.64                 | 0.000   | 0.042           | 0.52                  | 0.014   | 0.412           |
| Atf3                       | NM_007498                  | ref Mus musculus activating transcription factor 3 (Atf3), mRNA [NM_007498]                                                          | 1.52                 | 0.000   | 0.042           | 1.27                  | 0.009   | 0.400           |
| chr14:79311982-79334451_F  | chr14:79311982-79334451_F  | lincRNA:chr14:79311982-79334451 forward strand                                                                                       | 0.65                 | 0.000   | 0.042           | 0.61                  | 0.004   | 0.316           |
| Serpina3f                  | NM_001168294               | ref Mus musculus serine (or cysteine) peptidase inhibitor, clade A, member 3F (Serpina3f), transcript variant 1, mRNA [NM_001168294] | 0.96                 | 0.000   | 0.042           | 0.71                  | 0.001   | 0.227           |
| Ctla2a                     | NM_007796                  | ref Mus musculus cytotoxic T lymphocyte-associated protein 2 alpha (Ctla2a), transcript variant 1, mRNA [NM_007796]                  | 0.50                 | 0.000   | 0.042           | 0.44                  | 0.002   | 0.266           |

Online Supplemental Table IV: mG4H-STZ and Con-STZ Both

| Gene Symbol                      | RefSeq                    | Description                                                                                                                       | logFC<br>Con-<br>STZ | P-value | Adj.<br>P-value | logFC<br>mG4H-<br>STZ | P-value | Adj.<br>P-value |
|----------------------------------|---------------------------|-----------------------------------------------------------------------------------------------------------------------------------|----------------------|---------|-----------------|-----------------------|---------|-----------------|
| <b>Cpt1b</b>                     | NM_009948                 | ref Mus musculus carnitine palmitoyltransferase 1b, muscle (Cpt1b), nuclear gene encoding mitochondrial protein, mRNA [NM_009948] | 0.46                 | 0.000   | 0.042           | 0.37                  | 0.014   | 0.412           |
| <b>Gm4148</b>                    | XM_001479389              | ref PREDICTED: Mus musculus similar to gag protein (LOC100042984), mRNA [XM_001479389]                                            | 1.98                 | 0.000   | 0.042           | 1.65                  | 0.011   | 0.407           |
| <b>Fbln5</b>                     | NM_011812                 | ref Mus musculus fibulin 5 (Fbln5), mRNA [NM_011812]                                                                              | 0.55                 | 0.000   | 0.043           | 0.33                  | 0.023   | 0.456           |
| <b>Abra</b>                      | NM_175456                 | ref Mus musculus actin-binding Rho activating protein (Abra), mRNA [NM_175456]                                                    | 0.92                 | 0.000   | 0.043           | 0.60                  | 0.008   | 0.390           |
| <b>Ear2</b>                      | NM_007895                 | ref Mus musculus eosinophil-associated, ribonuclease A family, member 2 (Ear2), mRNA [NM_007895]                                  | 1.06                 | 0.000   | 0.043           | 1.42                  | 0.008   | 0.393           |
| <b>Itih3</b>                     | NM_008407                 | ref Mus musculus inter-alpha trypsin inhibitor, heavy chain 3 (Itih3), mRNA [NM_008407]                                           | 0.84                 | 0.000   | 0.043           | 0.95                  | 0.013   | 0.412           |
| <b>Mpzi2</b>                     | NM_007962                 | ref Mus musculus myelin protein zero-like 2 (Mpzi2), mRNA [NM_007962]                                                             | 0.98                 | 0.000   | 0.043           | 0.94                  | 0.015   | 0.421           |
| <b>Synpo</b>                     | NM_001109975              | ref Mus musculus synaptopodin (Synpo), transcript variant B, mRNA [NM_001109975]                                                  | 0.59                 | 0.000   | 0.043           | 0.47                  | 0.001   | 0.233           |
| <b>Rhou</b>                      | NM_133955                 | ref Mus musculus ras homolog gene family, member U (Rhou), mRNA [NM_133955]                                                       | 0.79                 | 0.000   | 0.043           | 0.52                  | 0.035   | 0.494           |
| <b>chr15:32167516-32174427_R</b> | chr15:32167516-32174427_R | lincRNA:chr15:32167516-32174427 reverse strand                                                                                    | 0.49                 | 0.000   | 0.043           | 0.31                  | 0.025   | 0.467           |
| <b>Ccbp2</b>                     | NM_021609                 | ref Mus musculus chemokine binding protein 2 (Ccbp2), mRNA [NM_021609]                                                            | 0.75                 | 0.000   | 0.043           | 0.55                  | 0.004   | 0.310           |
| <b>Slc2a2</b>                    | NM_031197                 | ref Mus musculus solute carrier family 2 (facilitated glucose transporter), member 2 (Slc2a2), mRNA [NM_031197]                   | 0.57                 | 0.000   | 0.045           | 0.57                  | 0.005   | 0.341           |
| <b>Cpt1b</b>                     | NM_009948                 | ref Mus musculus carnitine palmitoyltransferase 1b, muscle (Cpt1b), nuclear gene encoding mitochondrial protein, mRNA [NM_009948] | 0.44                 | 0.000   | 0.045           | 0.41                  | 0.014   | 0.418           |
| <b>Erf</b>                       | NM_010155                 | ref Mus musculus Ets2 repressor factor (Erf), mRNA [NM_010155]                                                                    | 0.53                 | 0.000   | 0.045           | 0.50                  | 0.006   | 0.356           |
| <b>Enah</b>                      | NM_010135                 | ref Mus musculus enabled homolog (Drosophila) (Enah), transcript variant 1, mRNA [NM_010135]                                      | 0.47                 | 0.000   | 0.045           | 0.32                  | 0.012   | 0.411           |

Online Supplemental Table IV: mG4H-STZ and Con-STZ Both

| Gene Symbol                      | RefSeq                    | Description                                                                                                                                                                                                         | logFC<br>Con-<br>STZ | P-value | Adj.<br>P-value | logFC<br>mG4H-<br>STZ | P-value | Adj.<br>P-value |
|----------------------------------|---------------------------|---------------------------------------------------------------------------------------------------------------------------------------------------------------------------------------------------------------------|----------------------|---------|-----------------|-----------------------|---------|-----------------|
| <b>Rtn4</b>                      | NM_194054                 | ref Mus musculus reticulon 4 (Rtn4), transcript variant 1, mRNA [NM_194054]                                                                                                                                         | 0.77                 | 0.001   | 0.046           | 0.54                  | 0.046   | 0.513           |
| <b>Tmem43</b>                    | NM_028766                 | ref Mus musculus transmembrane protein 43 (Tmem43), mRNA [NM_028766]                                                                                                                                                | 0.54                 | 0.001   | 0.046           | 0.53                  | 0.011   | 0.407           |
| <b>Cdc42ep4</b>                  | NM_020006                 | ref Mus musculus CDC42 effector protein (Rho GTPase binding) 4 (Cdc42ep4), transcript variant 1, mRNA [NM_020006]                                                                                                   | 0.89                 | 0.001   | 0.046           | 0.62                  | 0.029   | 0.477           |
| <b>E330037I15Rik</b>             | AK087890                  | gb Mus musculus 2 days pregnant adult female ovary cDNA, RIKEN full-length enriched library, clone:E330037I15 product:hypothetical Proline-rich region profile containing protein, full insert sequence. [AK087890] | 2.03                 | 0.001   | 0.046           | 1.62                  | 0.000   | 0.048           |
| <b>Asb4</b>                      | NM_023048                 | ref Mus musculus ankyrin repeat and SOCS box-containing 4 (Asb4), mRNA [NM_023048]                                                                                                                                  | 0.51                 | 0.001   | 0.046           | 0.42                  | 0.010   | 0.404           |
| <b>Serinc2</b>                   | NM_172702                 | ref Mus musculus serine incorporator 2 (Serinc2), mRNA [NM_172702]                                                                                                                                                  | 0.51                 | 0.001   | 0.049           | 0.47                  | 0.024   | 0.459           |
| <b>A130040M12Rik</b>             | NR_002860                 | ref Mus musculus RIKEN cDNA A130040M12 gene (A130040M12Rik), non-coding RNA [NR_002860]                                                                                                                             | 1.97                 | 0.001   | 0.049           | 1.59                  | 0.011   | 0.407           |
| <b>Ms4a6d</b>                    | NM_026835                 | ref Mus musculus membrane-spanning 4-domains, subfamily A, member 6D (Ms4a6d), mRNA [NM_026835]                                                                                                                     | 1.14                 | 0.001   | 0.049           | 0.70                  | 0.036   | 0.495           |
| <b>Hmox1</b>                     | NM_010442                 | ref Mus musculus heme oxygenase (decycling) 1 (Hmox1), mRNA [NM_010442]                                                                                                                                             | 1.17                 | 0.001   | 0.049           | 1.10                  | 0.021   | 0.449           |
| <b>chr7:86651948-86675223_R</b>  | chr7:86651948-86675223_R  | lincRNA:chr7:86651948-86675223 reverse strand                                                                                                                                                                       | 0.63                 | 0.001   | 0.050           | 0.52                  | 0.001   | 0.233           |
| <b>Timp3</b>                     | NM_011595                 | ref Mus musculus tissue inhibitor of metalloproteinase 3 (Timp3), mRNA [NM_011595]                                                                                                                                  | 1.11                 | 0.001   | 0.050           | 1.13                  | 0.016   | 0.426           |
| <b>chr11:97457180-97487074_F</b> | chr11:97457180-97487074_F | lincRNA:chr11:97457180-97487074 forward strand                                                                                                                                                                      | 0.47                 | 0.001   | 0.050           | 0.47                  | 0.002   | 0.279           |
| <b>Gm3651</b>                    | XM_001477698              | ref PREDICTED: Mus musculus similar to gag protein (LOC100042075), mRNA [XM_001477698]                                                                                                                              | 1.80                 | 0.001   | 0.050           | 1.45                  | 0.015   | 0.419           |
| <b>XM_001472371</b>              | XM_001472371              | ref PREDICTED: Mus musculus RIKEN cDNA 1200016E24 gene (1200016E24Rik), mRNA [XM_001472371]                                                                                                                         | 1.73                 | 0.001   | 0.051           | 1.33                  | 0.015   | 0.423           |



Online Supplemental Table IV: mG4H-STZ and Con-STZ Both

| Gene Symbol          | RefSeq       | Description                                                                                                                     | logFC<br>Con-<br>STZ | P-value | Adj.<br>P-value | logFC<br>mG4H-<br>STZ | P-value | Adj.<br>P-value |
|----------------------|--------------|---------------------------------------------------------------------------------------------------------------------------------|----------------------|---------|-----------------|-----------------------|---------|-----------------|
| <b>Atp13a3</b>       | NM_001128094 | ref Mus musculus ATPase type 13A3 (Atp13a3), transcript variant 2, mRNA [NM_001128094]                                          | 0.53                 | 0.001   | 0.051           | 0.59                  | 0.015   | 0.420           |
| <b>Socs3</b>         | NM_007707    | ref Mus musculus suppressor of cytokine signaling 3 (Socs3), mRNA [NM_007707]                                                   | 1.02                 | 0.001   | 0.051           | 0.71                  | 0.043   | 0.510           |
| <b>Pitpnm1</b>       | NM_008851    | ref Mus musculus phosphatidylinositol transfer protein, membrane-associated 1 (Pitpnm1), transcript variant 1, mRNA [NM_008851] | 0.48                 | 0.001   | 0.051           | 0.55                  | 0.009   | 0.398           |
| <b>Ahsg</b>          | NM_013465    | ref Mus musculus alpha-2-HS-glycoprotein (Ahsg), mRNA [NM_013465]                                                               | 1.63                 | 0.001   | 0.051           | 1.20                  | 0.030   | 0.477           |
| <b>Rab3b</b>         | NM_023537    | ref Mus musculus RAB3B, member RAS oncogene family (Rab3b), mRNA [NM_023537]                                                    | 0.50                 | 0.001   | 0.053           | 0.43                  | 0.045   | 0.513           |
| <b>Arfgap3</b>       | NM_025445    | ref Mus musculus ADP-ribosylation factor GTPase activating protein 3 (Arfgap3), mRNA [NM_025445]                                | 0.49                 | 0.001   | 0.053           | 0.41                  | 0.031   | 0.482           |
| <b>Uhrf1bp1l</b>     | NM_029166    | ref Mus musculus UHRF1 (ICBP90) binding protein 1-like (Uhrf1bp1l), mRNA [NM_029166]                                            | 0.50                 | 0.001   | 0.053           | 0.46                  | 0.005   | 0.355           |
| <b>Pdpk1</b>         | NM_011062    | ref Mus musculus 3-phosphoinositide dependent protein kinase-1 (Pdpk1), transcript variant 1, mRNA [NM_011062]                  | 0.43                 | 0.001   | 0.053           | 0.29                  | 0.013   | 0.412           |
| <b>Ednrb</b>         | NM_007904    | ref Mus musculus endothelin receptor type B (Ednrb), transcript variant 1, mRNA [NM_007904]                                     | 0.45                 | 0.001   | 0.053           | 0.38                  | 0.027   | 0.472           |
| <b>2310002L09Rik</b> | NM_027104    | ref Mus musculus RIKEN cDNA 2310002L09 gene (2310002L09Rik), transcript variant 2, mRNA [NM_027104]                             | 0.79                 | 0.001   | 0.053           | 0.86                  | 0.003   | 0.281           |
| <b>Cyb5r2</b>        | NM_177216    | ref Mus musculus cytochrome b5 reductase 2 (Cyb5r2), mRNA [NM_177216]                                                           | 0.83                 | 0.001   | 0.054           | 0.59                  | 0.013   | 0.412           |
| <b>Fgd3</b>          | NM_015759    | ref Mus musculus FYVE, RhoGEF and PH domain containing 3 (Fgd3), mRNA [NM_015759]                                               | 0.53                 | 0.001   | 0.054           | 0.58                  | 0.006   | 0.369           |
| <b>Hipk3</b>         | NM_010434    | ref Mus musculus homeodomain interacting protein kinase 3 (Hipk3), transcript variant 1, mRNA [NM_010434]                       | 0.49                 | 0.001   | 0.054           | 0.57                  | 0.008   | 0.393           |
| <b>Snord123</b>      | NR_028575    | ref Mus musculus small nucleolar RNA, C/D box 123 (Snord123), small nucleolar RNA [NR_028575]                                   | 0.41                 | 0.001   | 0.055           | 0.41                  | 0.003   | 0.281           |

| Online Supplemental Table IV: mG4H-STZ and Con-STZ Both |                            |                                                                                                                    |                      |         |                 |                       |         |                 |
|---------------------------------------------------------|----------------------------|--------------------------------------------------------------------------------------------------------------------|----------------------|---------|-----------------|-----------------------|---------|-----------------|
| Gene Symbol                                             | RefSeq                     | Description                                                                                                        | logFC<br>Con-<br>STZ | P-value | Adj.<br>P-value | logFC<br>mG4H-<br>STZ | P-value | Adj.<br>P-value |
| <b>Rbm3</b>                                             | NM_001166409               | ref Mus musculus RNA binding motif protein 3 (Rbm3), transcript variant 2, mRNA [NM_001166409]                     | 0.48                 | 0.001   | 0.055           | 0.59                  | 0.028   | 0.474           |
| <b>Fam124a</b>                                          | ENSMUST00000039064         | ref PREDICTED: Mus musculus predicted gene, EG629059 (EG629059), mRNA [XM_127791]                                  | 0.59                 | 0.001   | 0.056           | 0.49                  | 0.045   | 0.513           |
| <b>Calr3</b>                                            | NM_028500                  | ref Mus musculus calreticulin 3 (Calr3), transcript variant 1, mRNA [NM_028500]                                    | 0.53                 | 0.001   | 0.056           | 0.52                  | 0.048   | 0.516           |
| <b>Tfpi</b>                                             | NM_001177319               | ref Mus musculus tissue factor pathway inhibitor (Tfpi), transcript variant 2, mRNA [NM_001177319]                 | 0.34                 | 0.001   | 0.056           | 0.31                  | 0.007   | 0.383           |
| <b>Picalm</b>                                           | NM_146194                  | ref Mus musculus phosphatidylinositol binding clathrin assembly protein (Picalm), mRNA [NM_146194]                 | 0.77                 | 0.001   | 0.056           | 0.54                  | 0.004   | 0.313           |
| <b>Mt2</b>                                              | NM_008630                  | ref Mus musculus metallothionein 2 (Mt2), mRNA [NM_008630]                                                         | 2.53                 | 0.001   | 0.056           | 2.02                  | 0.023   | 0.454           |
| <b>Lamp2</b>                                            | NM_001017959               | ref Mus musculus lysosomal-associated membrane protein 2 (Lamp2), transcript variant 1, mRNA [NM_001017959]        | 0.57                 | 0.001   | 0.057           | 0.62                  | 0.004   | 0.308           |
| <b>S100a4</b>                                           | NM_011311                  | ref Mus musculus S100 calcium binding protein A4 (S100a4), mRNA [NM_011311]                                        | 0.88                 | 0.001   | 0.057           | 0.76                  | 0.039   | 0.500           |
| <b>Mafk</b>                                             | NM_010757                  | ref Mus musculus v-maf musculoaponeurotic fibrosarcoma oncogene family, protein K (avian) (Mafk), mRNA [NM_010757] | 0.76                 | 0.001   | 0.057           | 0.84                  | 0.012   | 0.407           |
| <b>chr3:146629425-146649125_F</b>                       | chr3:146629425-146649125_F | lincRNA:chr3:146629425-146649125 forward strand                                                                    | 0.67                 | 0.001   | 0.058           | 0.66                  | 0.004   | 0.308           |
| <b>BC029214</b>                                         | NM_153557                  | ref Mus musculus cDNA sequence BC029214 (BC029214), mRNA [NM_153557]                                               | 0.50                 | 0.001   | 0.058           | 0.42                  | 0.019   | 0.439           |
| <b>Gpihbp1</b>                                          | NM_026730                  | ref Mus musculus GPI-anchored HDL-binding protein 1 (Gpihbp1), mRNA [NM_026730]                                    | 0.65                 | 0.001   | 0.058           | 0.52                  | 0.020   | 0.441           |
| <b>Etv5</b>                                             | NM_023794                  | ref Mus musculus ets variant gene 5 (Etv5), mRNA [NM_023794]                                                       | 0.54                 | 0.001   | 0.058           | 0.77                  | 0.000   | 0.037           |
| <b>Serping1</b>                                         | NM_009776                  | ref Mus musculus serine (or cysteine) peptidase inhibitor, clade G, member 1 (Serping1), mRNA [NM_009776]          | 0.74                 | 0.001   | 0.058           | 0.49                  | 0.044   | 0.511           |
| <b>Gm11757</b>                                          | NM_001085538               | ref Mus musculus predicted gene 11757 (Gm11757), mRNA [NM_001085538]                                               | 0.43                 | 0.001   | 0.059           | 0.51                  | 0.017   | 0.432           |

Online Supplemental Table IV: mG4H-STZ and Con-STZ Both

| Gene Symbol                      | RefSeq                    | Description                                                                                                           | logFC<br>Con-<br>STZ | P-value | Adj.<br>P-value | logFC<br>mG4H-<br>STZ | P-value | Adj.<br>P-value |
|----------------------------------|---------------------------|-----------------------------------------------------------------------------------------------------------------------|----------------------|---------|-----------------|-----------------------|---------|-----------------|
| <b>Ms4a4a</b>                    | XM_889011                 | ref PREDICTED: Mus musculus similar to MS4A4A protein (LOC624461), mRNA [XM_889011]                                   | 1.37                 | 0.001   | 0.059           | 1.05                  | 0.047   | 0.514           |
| <b>Cd44</b>                      | NM_009851                 | ref Mus musculus CD44 antigen (Cd44), transcript variant 1, mRNA [NM_009851]                                          | 0.82                 | 0.001   | 0.059           | 0.80                  | 0.012   | 0.408           |
| <b>Cyp4b1</b>                    | NM_007823                 | ref Mus musculus cytochrome P450, family 4, subfamily b, polypeptide 1 (Cyp4b1), mRNA [NM_007823]                     | 0.90                 | 0.001   | 0.059           | 0.65                  | 0.046   | 0.513           |
| <b>chr18:61781410-61788685_R</b> | chr18:61781410-61788685_R | lincRNA:chr18:61781410-61788685 reverse strand                                                                        | 0.60                 | 0.001   | 0.059           | 0.45                  | 0.046   | 0.514           |
| <b>Calr3</b>                     | NM_028500                 | ref Mus musculus calreticulin 3 (Calr3), transcript variant 1, mRNA [NM_028500]                                       | 0.53                 | 0.001   | 0.060           | 0.55                  | 0.031   | 0.481           |
| <b>Tuba1c</b>                    | BC022182                  | gb Mus musculus tubulin, alpha 1C, mRNA (cDNA clone MGC:14067 IMAGE:3661220), complete cds. [BC022182]                | 0.60                 | 0.001   | 0.060           | 0.45                  | 0.006   | 0.365           |
| <b>Slain2</b>                    | NM_153567                 | ref Mus musculus SLAIN motif family, member 2 (Slain2), transcript variant 1, mRNA [NM_153567]                        | 0.35                 | 0.001   | 0.060           | 0.34                  | 0.008   | 0.391           |
| <b>Nbl1</b>                      | NM_008675                 | ref Mus musculus neuroblastoma, suppression of tumorigenicity 1 (Nbl1), mRNA [NM_008675]                              | 0.48                 | 0.001   | 0.060           | 0.31                  | 0.032   | 0.484           |
| <b>Vsig4</b>                     | NM_177789                 | ref Mus musculus V-set and immunoglobulin domain containing 4 (Vsig4), mRNA [NM_177789]                               | 1.03                 | 0.001   | 0.060           | 0.91                  | 0.029   | 0.477           |
| <b>ENSMUST00000031781</b>        | ENSMUST00000031781        | ens coiled-coil domain containing 136 Gene [Source:MGI (curated);Acc:MGI:1918128] [ENSMUST00000031781]                | 0.61                 | 0.001   | 0.060           | 0.39                  | 0.045   | 0.513           |
| <b>Rrbp1</b>                     | NM_133626                 | ref Mus musculus ribosome binding protein 1 (Rrbp1), transcript variant 2, mRNA [NM_133626]                           | 0.37                 | 0.001   | 0.060           | 0.39                  | 0.027   | 0.471           |
| <b>Rps6kb1</b>                   | NM_028259                 | ref Mus musculus ribosomal protein S6 kinase, polypeptide 1 (Rps6kb1), transcript variant 2, mRNA [NM_028259]         | 0.79                 | 0.001   | 0.060           | 0.85                  | 0.003   | 0.305           |
| <b>Prx</b>                       | NM_019412                 | ref Mus musculus periaxin (Prx), transcript variant 2, mRNA [NM_019412]                                               | 0.60                 | 0.001   | 0.060           | 0.54                  | 0.017   | 0.429           |
| <b>Gnl3</b>                      | NM_153547                 | ref Mus musculus guanine nucleotide binding protein-like 3 (nucleolar) (Gnl3), transcript variant 1, mRNA [NM_153547] | 0.39                 | 0.001   | 0.060           | 0.34                  | 0.031   | 0.481           |
| <b>Podn</b>                      | NM_172874                 | ref Mus musculus podocan (Podn), mRNA [NM_172874]                                                                     | 0.57                 | 0.001   | 0.060           | 0.40                  | 0.025   | 0.464           |

| Online Supplemental Table IV: mG4H-STZ and Con-STZ Both |                            |                                                                                                                                                              |                      |         |                 |                       |         |                 |
|---------------------------------------------------------|----------------------------|--------------------------------------------------------------------------------------------------------------------------------------------------------------|----------------------|---------|-----------------|-----------------------|---------|-----------------|
| Gene Symbol                                             | RefSeq                     | Description                                                                                                                                                  | logFC<br>Con-<br>STZ | P-value | Adj.<br>P-value | logFC<br>mG4H-<br>STZ | P-value | Adj.<br>P-value |
| Gm2708                                                  | XM_001474512               | ref PREDICTED: Mus musculus hypothetical protein LOC100040315 (LOC100040315), mRNA [XM_001474512]                                                            | 0.41                 | 0.001   | 0.060           | 0.34                  | 0.014   | 0.415           |
| Gm2251                                                  | XM_001472850               | ref PREDICTED: Mus musculus similar to gag protein, transcript variant 1 (LOC100039464), mRNA [XM_001472850]                                                 | 1.34                 | 0.001   | 0.060           | 1.11                  | 0.025   | 0.463           |
| Fam26e                                                  | NM_178908                  | ref Mus musculus family with sequence similarity 26, member E (Fam26e), mRNA [NM_178908]                                                                     | 1.02                 | 0.001   | 0.061           | 0.66                  | 0.010   | 0.400           |
| Bcr                                                     | NM_001081412               | ref Mus musculus breakpoint cluster region (Bcr), mRNA [NM_001081412]                                                                                        | 0.55                 | 0.001   | 0.061           | 0.39                  | 0.036   | 0.495           |
| St6galnac4                                              | NM_011373                  | ref Mus musculus ST6 (alpha-N-acetyl-neuraminy-2,3-beta-galactosyl-1,3)-N-acetylgalactosaminide alpha-2,6-sialyltransferase 4 (St6galnac4), mRNA [NM_011373] | 0.46                 | 0.001   | 0.062           | 0.46                  | 0.003   | 0.308           |
| Uchl1                                                   | NM_011670                  | ref Mus musculus ubiquitin carboxy-terminal hydrolase L1 (Uchl1), mRNA [NM_011670]                                                                           | 0.82                 | 0.001   | 0.063           | 0.76                  | 0.009   | 0.394           |
| Myom2                                                   | NM_008664                  | ref Mus musculus myomesin 2 (Myom2), mRNA [NM_008664]                                                                                                        | 0.44                 | 0.001   | 0.063           | 0.36                  | 0.012   | 0.410           |
| Csrnp1                                                  | NM_153287                  | ref Mus musculus cysteine-serine-rich nuclear protein 1 (Csrnp1), mRNA [NM_153287]                                                                           | 0.90                 | 0.001   | 0.063           | 1.08                  | 0.032   | 0.484           |
| chr3:146629425-146649125_F                              | chr3:146629425-146649125_F | lincRNA:chr3:146629425-146649125 forward strand                                                                                                              | 0.66                 | 0.001   | 0.063           | 0.60                  | 0.008   | 0.393           |
| BB166591                                                | AK037728                   | gb Mus musculus 16 days neonate thymus cDNA, RIKEN full-length enriched library, clone:A130042K21 product:unclassifiable, full insert sequence. [AK037728]   | 1.01                 | 0.001   | 0.064           | 0.81                  | 0.012   | 0.409           |
| Bgn                                                     | NM_007542                  | ref Mus musculus biglycan (Bgn), mRNA [NM_007542]                                                                                                            | 0.66                 | 0.001   | 0.064           | 0.41                  | 0.029   | 0.477           |
| Ddx21                                                   | NM_019553                  | ref Mus musculus DEAD (Asp-Glu-Ala-Asp) box polypeptide 21 (Ddx21), mRNA [NM_019553]                                                                         | 0.60                 | 0.001   | 0.065           | 0.62                  | 0.006   | 0.369           |
| Acadl                                                   | NM_007381                  | ref Mus musculus acyl-Coenzyme A dehydrogenase, long-chain (Acadl), nuclear gene encoding mitochondrial protein, mRNA [NM_007381]                            | 0.41                 | 0.001   | 0.065           | 0.35                  | 0.024   | 0.458           |
| Arhgdig                                                 | NM_008113                  | ref Mus musculus Rho GDP dissociation inhibitor (GDI) gamma (Arhgdig), mRNA [NM_008113]                                                                      | 0.73                 | 0.001   | 0.066           | 0.58                  | 0.009   | 0.398           |

Online Supplemental Table IV: mG4H-STZ and Con-STZ Both

| Gene Symbol                       | RefSeq                     | Description                                                                                                                                         | logFC<br>Con-<br>STZ | P-value | Adj.<br>P-value | logFC<br>mG4H-<br>STZ | P-value | Adj.<br>P-value |
|-----------------------------------|----------------------------|-----------------------------------------------------------------------------------------------------------------------------------------------------|----------------------|---------|-----------------|-----------------------|---------|-----------------|
| <b>Inf2</b>                       | NM_198411                  | ref Mus musculus inverted formin, FH2 and WH2 domain containing (Inf2), mRNA [NM_198411]                                                            | 0.41                 | 0.001   | 0.066           | 0.23                  | 0.050   | 0.519           |
| <b>Tmtc1</b>                      | NM_198967                  | ref Mus musculus transmembrane and tetratricopeptide repeat containing 1 (Tmtc1), mRNA [NM_198967]                                                  | 0.55                 | 0.001   | 0.066           | 0.63                  | 0.001   | 0.173           |
| <b>Dlgap4</b>                     | NM_146128                  | ref Mus musculus discs, large homolog-associated protein 4 (Drosophila) (Dlgap4), transcript variant 1, mRNA [NM_146128]                            | 0.36                 | 0.001   | 0.066           | 0.28                  | 0.032   | 0.485           |
| <b>Myh14</b>                      | NM_028021                  | ref Mus musculus myosin, heavy polypeptide 14 (Myh14), mRNA [NM_028021]                                                                             | 0.43                 | 0.001   | 0.067           | 0.38                  | 0.016   | 0.425           |
| <b>chr19:56815544-56821403_R</b>  | chr19:56815544-56821403_R  | lincRNA:chr19:56815544-56821403 reverse strand                                                                                                      | 0.60                 | 0.001   | 0.068           | 0.37                  | 0.016   | 0.425           |
| <b>chr4:146507925-146532650_R</b> | chr4:146507925-146532650_R | lincRNA:chr4:146507925-146532650 reverse strand                                                                                                     | 0.45                 | 0.001   | 0.068           | 0.43                  | 0.020   | 0.443           |
| <b>Fam168a</b>                    | NM_178764                  | ref Mus musculus family with sequence similarity 168, member A (Fam168a), mRNA [NM_178764]                                                          | 0.42                 | 0.001   | 0.068           | 0.33                  | 0.008   | 0.391           |
| <b>D2Ert391e</b>                  | NM_145528                  | ref Mus musculus DNA segment, Chr 2, ERATO Doi 391, expressed (D2Ert391e), mRNA [NM_145528]                                                         | 0.71                 | 0.001   | 0.068           | 0.71                  | 0.012   | 0.411           |
| <b>Clip1</b>                      | NM_019765                  | ref Mus musculus CAP-GLY domain containing linker protein 1 (Clip1), mRNA [NM_019765]                                                               | 0.58                 | 0.001   | 0.068           | 0.51                  | 0.016   | 0.428           |
| <b>Elov11</b>                     | NM_001039176               | ref Mus musculus elongation of very long chain fatty acids (FEN1/Elo2, SUR4/Elo3, yeast)-like 1 (Elov11), transcript variant 1, mRNA [NM_001039176] | 0.50                 | 0.001   | 0.068           | 0.42                  | 0.012   | 0.408           |
| <b>chr15:32167516-32174427_R</b>  | chr15:32167516-32174427_R  | lincRNA:chr15:32167516-32174427 reverse strand                                                                                                      | 0.47                 | 0.001   | 0.069           | 0.39                  | 0.004   | 0.323           |
| <b>Casz1</b>                      | NM_027195                  | ref Mus musculus castor homolog 1, zinc finger (Drosophila) (Casz1), transcript variant 2, mRNA [NM_027195]                                         | 0.43                 | 0.001   | 0.069           | 0.55                  | 0.001   | 0.183           |
| <b>1700011I03Rik</b>              | NM_029290                  | ref Mus musculus RIKEN cDNA 1700011I03 gene (1700011I03Rik), mRNA [NM_029290]                                                                       | 1.44                 | 0.001   | 0.070           | 1.50                  | 0.045   | 0.513           |
| <b>8430408G22Rik</b>              | NM_145980                  | ref Mus musculus RIKEN cDNA 8430408G22 gene (8430408G22Rik), transcript variant 1, mRNA [NM_145980]                                                 | 1.23                 | 0.001   | 0.070           | 1.04                  | 0.023   | 0.453           |

Online Supplemental Table IV: mG4H-STZ and Con-STZ Both

| Gene Symbol                 | RefSeq                      | Description                                                                                                                | logFC<br>Con-<br>STZ | P-value | Adj.<br>P-value | logFC<br>mG4H-<br>STZ | P-value | Adj.<br>P-value |
|-----------------------------|-----------------------------|----------------------------------------------------------------------------------------------------------------------------|----------------------|---------|-----------------|-----------------------|---------|-----------------|
| Pik3r5                      | NM_177320                   | ref Mus musculus phosphoinositide-3-kinase, regulatory subunit 5, p101 (Pik3r5), mRNA [NM_177320]                          | 0.70                 | 0.001   | 0.070           | 0.57                  | 0.011   | 0.407           |
| chr15:32167516-32174427_R   | chr15:32167516-32174427_R   | lincRNA:chr15:32167516-32174427 reverse strand                                                                             | 0.43                 | 0.001   | 0.070           | 0.36                  | 0.014   | 0.418           |
| 4931408A02Rik               | NM_027627                   | ref Mus musculus RIKEN cDNA 4931408A02 gene (4931408A02Rik), mRNA [NM_027627]                                              | 1.17                 | 0.001   | 0.070           | 1.03                  | 0.033   | 0.490           |
| Gcnt2                       | NM_133219                   | ref Mus musculus glucosaminyl (N-acetyl) transferase 2, l-branching enzyme (Gcnt2), transcript variant 3, mRNA [NM_133219] | 0.87                 | 0.001   | 0.071           | 0.91                  | 0.016   | 0.426           |
| Ptpro                       | NM_011216                   | ref Mus musculus protein tyrosine phosphatase, receptor type, O (Ptpro), transcript variant 1, mRNA [NM_011216]            | 0.79                 | 0.001   | 0.071           | 0.51                  | 0.002   | 0.257           |
| chr13:113555055-113564665_F | chr13:113555055-113564665_F | lincRNA:chr13:113555055-113564665 forward strand                                                                           | 0.76                 | 0.001   | 0.071           | 0.50                  | 0.018   | 0.437           |
| Fos                         | NM_010234                   | ref Mus musculus FBJ osteosarcoma oncogene (Fos), mRNA [NM_010234]                                                         | 1.02                 | 0.001   | 0.072           | 1.02                  | 0.019   | 0.437           |
| Pgf                         | NM_008827                   | ref Mus musculus placental growth factor (Pgf), mRNA [NM_008827]                                                           | 0.66                 | 0.001   | 0.072           | 0.58                  | 0.042   | 0.508           |
| Lsr                         | NM_017405                   | ref Mus musculus lipolysis stimulated lipoprotein receptor (Lsr), transcript variant 1, mRNA [NM_017405]                   | 0.72                 | 0.001   | 0.072           | 0.59                  | 0.017   | 0.429           |
| chr3:146515333-146557069_F  | chr3:146515333-146557069_F  | lincRNA:chr3:146515333-146557069 forward strand                                                                            | 0.67                 | 0.001   | 0.073           | 0.62                  | 0.018   | 0.435           |
| AI429363                    | CF532098                    | gb UI-M-FY0-cgr-m-18-0-UI.r1 NIH_BMAP_FY0 Mus musculus cDNA clone IMAGE:30363281 5', mRNA sequence [CF532098]              | 0.63                 | 0.001   | 0.074           | 0.40                  | 0.033   | 0.490           |
| Dennd5a                     | NM_021494                   | ref Mus musculus DENN/MADD domain containing 5A (Dennd5a), mRNA [NM_021494]                                                | 0.34                 | 0.001   | 0.074           | 0.37                  | 0.002   | 0.281           |
| Vwa5a                       | NM_172767                   | ref Mus musculus von Willebrand factor A domain containing 5A (Vwa5a), mRNA [NM_172767]                                    | 0.41                 | 0.001   | 0.074           | 0.36                  | 0.010   | 0.401           |
| Pthlh                       | NM_008970                   | ref Mus musculus parathyroid hormone-like peptide (Pthlh), mRNA [NM_008970]                                                | 0.68                 | 0.001   | 0.075           | 0.79                  | 0.035   | 0.494           |
| Smtnl1                      | NM_024230                   | ref Mus musculus smoothelin-like 1 (Smtnl1), mRNA [NM_024230]                                                              | 0.68                 | 0.001   | 0.075           | 0.71                  | 0.006   | 0.369           |



Online Supplemental Table IV: mG4H-STZ and Con-STZ Both

| Gene Symbol                       | RefSeq                     | Description                                                                                                                                                               | logFC<br>Con-<br>STZ | P-value | Adj.<br>P-value | logFC<br>mG4H-<br>STZ | P-value | Adj.<br>P-value |
|-----------------------------------|----------------------------|---------------------------------------------------------------------------------------------------------------------------------------------------------------------------|----------------------|---------|-----------------|-----------------------|---------|-----------------|
| <b>Junb</b>                       | NM_008416                  | ref Mus musculus Jun-B oncogene (Junb), mRNA [NM_008416]                                                                                                                  | 0.56                 | 0.001   | 0.076           | 0.52                  | 0.038   | 0.499           |
| <b>Ppp1r15a</b>                   | NM_008654                  | ref Mus musculus protein phosphatase 1, regulatory (inhibitor) subunit 15A (Ppp1r15a), mRNA [NM_008654]                                                                   | 0.71                 | 0.001   | 0.076           | 0.76                  | 0.014   | 0.418           |
| <b>Ppap2a</b>                     | NM_008903                  | ref Mus musculus phosphatidic acid phosphatase type 2A (Ppap2a), transcript variant 2, mRNA [NM_008903]                                                                   | 0.57                 | 0.001   | 0.077           | 0.37                  | 0.043   | 0.511           |
| <b>chr4:146507925-146532650_R</b> | chr4:146507925-146532650_R | lincRNA:chr4:146507925-146532650 reverse strand                                                                                                                           | 0.49                 | 0.001   | 0.077           | 0.42                  | 0.009   | 0.396           |
| <b>Lgals4</b>                     | NM_010706                  | ref Mus musculus lectin, galactose binding, soluble 4 (Lgals4), mRNA [NM_010706]                                                                                          | 0.77                 | 0.001   | 0.077           | 0.49                  | 0.009   | 0.398           |
| <b>Rpp25</b>                      | NM_133982                  | ref Mus musculus ribonuclease P 25 subunit (human) (Rpp25), mRNA [NM_133982]                                                                                              | 0.75                 | 0.001   | 0.078           | 0.67                  | 0.003   | 0.299           |
| <b>Spg7</b>                       | NM_153176                  | ref Mus musculus spastic paraplegia 7 homolog (human) (Spg7), nuclear gene encoding mitochondrial protein, mRNA [NM_153176]                                               | 0.36                 | 0.001   | 0.078           | 0.23                  | 0.047   | 0.515           |
| <b>Acaa2</b>                      | NM_177470                  | ref Mus musculus acetyl-Coenzyme A acyltransferase 2 (mitochondrial 3-oxoacyl-Coenzyme A thiolase) (Acaa2), nuclear gene encoding mitochondrial protein, mRNA [NM_177470] | 0.32                 | 0.001   | 0.078           | 0.21                  | 0.038   | 0.499           |
| <b>Slco2a1</b>                    | NM_033314                  | ref Mus musculus solute carrier organic anion transporter family, member 2a1 (Slco2a1), mRNA [NM_033314]                                                                  | 0.48                 | 0.001   | 0.078           | 0.43                  | 0.042   | 0.508           |
| <b>Frzb</b>                       | NM_011356                  | ref Mus musculus frizzled-related protein (Frzb), mRNA [NM_011356]                                                                                                        | 0.59                 | 0.001   | 0.078           | 0.35                  | 0.046   | 0.513           |
| <b>Rad52</b>                      | NM_011236                  | ref Mus musculus RAD52 homolog (S. cerevisiae) (Rad52), transcript variant 4, mRNA [NM_011236]                                                                            | 0.55                 | 0.001   | 0.078           | 0.51                  | 0.041   | 0.507           |
| <b>Tlr13</b>                      | NM_205820                  | ref Mus musculus toll-like receptor 13 (Tlr13), mRNA [NM_205820]                                                                                                          | 0.56                 | 0.001   | 0.078           | 0.49                  | 0.021   | 0.450           |
| <b>Adora2b</b>                    | NM_007413                  | ref Mus musculus adenosine A2b receptor (Adora2b), mRNA [NM_007413]                                                                                                       | 0.65                 | 0.001   | 0.079           | 0.47                  | 0.008   | 0.391           |
| <b>Tnfrsf1a</b>                   | NM_011609                  | ref Mus musculus tumor necrosis factor receptor superfamily, member 1a (Tnfrsf1a), mRNA [NM_011609]                                                                       | 0.58                 | 0.001   | 0.079           | 0.42                  | 0.014   | 0.414           |
| <b>Hrct1</b>                      | NM_027511                  | ref Mus musculus histidine rich carboxyl terminus 1 (Hrct1), mRNA [NM_027511]                                                                                             | 0.77                 | 0.001   | 0.080           | 0.80                  | 0.019   | 0.439           |

| Online Supplemental Table IV: mG4H-STZ and Con-STZ Both |                            |                                                                                                                                                          |                      |         |                 |                       |         |                 |
|---------------------------------------------------------|----------------------------|----------------------------------------------------------------------------------------------------------------------------------------------------------|----------------------|---------|-----------------|-----------------------|---------|-----------------|
| Gene Symbol                                             | RefSeq                     | Description                                                                                                                                              | logFC<br>Con-<br>STZ | P-value | Adj.<br>P-value | logFC<br>mG4H-<br>STZ | P-value | Adj.<br>P-value |
| <b>Il4ra</b>                                            | NM_001008700               | ref Mus musculus interleukin 4 receptor, alpha (Il4ra), mRNA [NM_001008700]                                                                              | 0.51                 | 0.001   | 0.080           | 0.44                  | 0.024   | 0.459           |
| <b>Tox3</b>                                             | NM_172913                  | ref Mus musculus TOX high mobility group box family member 3 (Tox3), mRNA [NM_172913]                                                                    | 0.38                 | 0.001   | 0.080           | 0.39                  | 0.007   | 0.382           |
| <b>Mmp17</b>                                            | NM_011846                  | ref Mus musculus matrix metalloproteinase 17 (Mmp17), mRNA [NM_011846]                                                                                   | 0.41                 | 0.002   | 0.081           | 0.35                  | 0.008   | 0.391           |
| <b>Vsig10l</b>                                          | ENSMUST00000107977         | ens ZV-set and immunoglobulin domain containing 10 like Gene [Source:MGI (curated);Acc:MGI:1922940] [ENSMUST00000107977]                                 | 0.52                 | 0.002   | 0.082           | 0.43                  | 0.006   | 0.366           |
| <b>Fam161b</b>                                          | NM_172581                  | ref Mus musculus family with sequence similarity 161, member B (Fam161b), mRNA [NM_172581]                                                               | 0.57                 | 0.002   | 0.083           | 0.42                  | 0.020   | 0.441           |
| <b>Coq10b</b>                                           | NM_001039710               | ref Mus musculus coenzyme Q10 homolog B (S. cerevisiae) (Coq10b), nuclear gene encoding mitochondrial protein, transcript variant 1, mRNA [NM_001039710] | 0.45                 | 0.002   | 0.085           | 0.35                  | 0.026   | 0.470           |
| <b>Ctla2b</b>                                           | NM_007797                  | ref Mus musculus cytotoxic T lymphocyte-associated protein 2 beta (Ctla2b), transcript variant 1, mRNA [NM_007797]                                       | 0.50                 | 0.002   | 0.085           | 0.43                  | 0.004   | 0.325           |
| <b>Cyb5r3</b>                                           | NM_029787                  | ref Mus musculus cytochrome b5 reductase 3 (Cyb5r3), mRNA [NM_029787]                                                                                    | 0.41                 | 0.002   | 0.086           | 0.32                  | 0.049   | 0.519           |
| <b>Nr2c2ap</b>                                          | NM_001025586               | ref Mus musculus nuclear receptor 2C2-associated protein (Nr2c2ap), transcript variant 1, mRNA [NM_001025586]                                            | 0.63                 | 0.002   | 0.086           | 0.65                  | 0.004   | 0.316           |
| <b>chr5:107504871-107507830_F</b>                       | chr5:107504871-107507830_F | lincRNA:chr5:107504871-107507830 forward strand                                                                                                          | 0.69                 | 0.002   | 0.086           | 0.58                  | 0.032   | 0.484           |
| <b>ENSMUST00000097978</b>                               | ENSMUST00000097978         | ens Putative uncharacterized protein [Source:UniProtKB/TrEMBL;Acc:Q3V0B3] [ENSMUST00000097978]                                                           | 1.09                 | 0.002   | 0.086           | 0.94                  | 0.016   | 0.426           |
| <b>Pnp2</b>                                             | NM_001123371               | ref Mus musculus purine-nucleoside phosphorylase 2 (Pnp2), mRNA [NM_001123371]                                                                           | 1.17                 | 0.002   | 0.086           | 1.25                  | 0.027   | 0.471           |
| <b>Csnk1d</b>                                           | NM_139059                  | ref Mus musculus casein kinase 1, delta (Csnk1d), transcript variant 1, mRNA [NM_139059]                                                                 | 0.41                 | 0.002   | 0.087           | 0.54                  | 0.024   | 0.458           |

Online Supplemental Table IV: mG4H-STZ and Con-STZ Both

| Gene Symbol                       | RefSeq                     | Description                                                                                                                         | logFC<br>Con-<br>STZ | P-value | Adj.<br>P-value | logFC<br>mG4H-<br>STZ | P-value | Adj.<br>P-value |
|-----------------------------------|----------------------------|-------------------------------------------------------------------------------------------------------------------------------------|----------------------|---------|-----------------|-----------------------|---------|-----------------|
| <b>Tmem164</b>                    | NM_177592                  | ref Mus musculus transmembrane protein 164 (Tmem164), mRNA [NM_177592]                                                              | 0.64                 | 0.002   | 0.088           | 0.53                  | 0.008   | 0.391           |
| <b>Cnksr3</b>                     | NM_172546                  | ref Mus musculus Cnksr family member 3 (Cnksr3), mRNA [NM_172546]                                                                   | 0.67                 | 0.002   | 0.089           | 0.46                  | 0.039   | 0.501           |
| <b>Serpine2</b>                   | NM_009255                  | ref Mus musculus serine (or cysteine) peptidase inhibitor, clade E, member 2 (Serpine2), mRNA [NM_009255]                           | 0.79                 | 0.002   | 0.091           | 0.47                  | 0.042   | 0.507           |
| <b>Apoc2</b>                      | NM_009695                  | ref Mus musculus apolipoprotein C-II (Apoc2), mRNA [NM_009695]                                                                      | 1.04                 | 0.002   | 0.091           | 1.22                  | 0.005   | 0.356           |
| <b>Limd1</b>                      | NM_013860                  | ref Mus musculus LIM domains containing 1 (Limd1), mRNA [NM_013860]                                                                 | 0.54                 | 0.002   | 0.091           | 0.45                  | 0.015   | 0.419           |
| <b>Hecw2</b>                      | NM_001001883               | ref Mus musculus HECT, C2 and WW domain containing E3 ubiquitin protein ligase 2 (Hecw2), transcript variant 1, mRNA [NM_001001883] | 0.57                 | 0.002   | 0.091           | 0.35                  | 0.021   | 0.449           |
| <b>Tiparp</b>                     | NM_178892                  | ref Mus musculus TCDD-inducible poly(ADP-ribose) polymerase (Tiparp), mRNA [NM_178892]                                              | 0.45                 | 0.002   | 0.092           | 0.54                  | 0.030   | 0.477           |
| <b>Itgb3</b>                      | NM_016780                  | ref Mus musculus integrin beta 3 (Itgb3), mRNA [NM_016780]                                                                          | 0.73                 | 0.002   | 0.093           | 0.62                  | 0.034   | 0.493           |
| <b>chr9:118291593-118324230_F</b> | chr9:118291593-118324230_F | lincRNA:chr9:118291593-118324230 forward strand                                                                                     | 0.58                 | 0.002   | 0.093           | 0.43                  | 0.025   | 0.464           |
| <b>Rab11b</b>                     | NM_008997                  | ref Mus musculus RAB11B, member RAS oncogene family (Rab11b), mRNA [NM_008997]                                                      | 0.31                 | 0.002   | 0.093           | 0.27                  | 0.035   | 0.495           |
| <b>Fam181b</b>                    | NM_021427                  | ref Mus musculus family with sequence similarity 181, member B (Fam181b), mRNA [NM_021427]                                          | 0.48                 | 0.002   | 0.093           | 0.42                  | 0.008   | 0.389           |
| <b>chr4:146507925-146532650_R</b> | chr4:146507925-146532650_R | lincRNA:chr4:146507925-146532650 reverse strand                                                                                     | 0.50                 | 0.002   | 0.094           | 0.47                  | 0.023   | 0.453           |
| <b>Eif4ebp1</b>                   | NM_007918                  | ref Mus musculus eukaryotic translation initiation factor 4E binding protein 1 (Eif4ebp1), mRNA [NM_007918]                         | 0.79                 | 0.002   | 0.094           | 0.69                  | 0.019   | 0.439           |
| <b>Hdac6</b>                      | NM_010413                  | ref Mus musculus histone deacetylase 6 (Hdac6), transcript variant 1, mRNA [NM_010413]                                              | 0.31                 | 0.002   | 0.094           | 0.34                  | 0.005   | 0.346           |
| <b>Tnfaip6</b>                    | NM_009398                  | ref Mus musculus tumor necrosis factor alpha induced protein 6 (Tnfaip6), mRNA [NM_009398]                                          | 0.95                 | 0.002   | 0.094           | 0.56                  | 0.034   | 0.493           |

Online Supplemental Table IV: mG4H-STZ and Con-STZ Both

| Gene Symbol                     | RefSeq                   | Description                                                                                                             | logFC<br>Con-<br>STZ | P-value | Adj.<br>P-value | logFC<br>mG4H-<br>STZ | P-value | Adj.<br>P-value |
|---------------------------------|--------------------------|-------------------------------------------------------------------------------------------------------------------------|----------------------|---------|-----------------|-----------------------|---------|-----------------|
| <b>chr3:62895551-62896444_R</b> | chr3:62895551-62896444_R | lincRNA:chr3:62895551-62896444 reverse strand                                                                           | 0.67                 | 0.002   | 0.096           | 0.89                  | 0.001   | 0.188           |
| <b>Gm2563</b>                   | XM_001473985             | ref PREDICTED: Mus musculus similar to pol protein (LOC100040034), mRNA [XM_001473985]                                  | 1.33                 | 0.002   | 0.096           | 1.13                  | 0.010   | 0.400           |
| <b>Gm2805</b>                   | XR_031827                | ref PREDICTED: Mus musculus similar to myosin regulatory light chain-like (LOC100040496), misc RNA [XR_031827]          | 0.37                 | 0.002   | 0.096           | 0.25                  | 0.042   | 0.507           |
| <b>Azin1</b>                    | NM_018745                | ref Mus musculus antizyme inhibitor 1 (Azin1), transcript variant 2, mRNA [NM_018745]                                   | 0.46                 | 0.002   | 0.097           | 0.45                  | 0.004   | 0.308           |
| <b>Tbx20</b>                    | NM_020496                | ref Mus musculus T-box 20 (Tbx20), transcript variant 2, mRNA [NM_020496]                                               | 0.66                 | 0.002   | 0.099           | 0.81                  | 0.007   | 0.383           |
| <b>Clca2</b>                    | NM_030601                | ref Mus musculus chloride channel calcium activated 2 (Clca2), mRNA [NM_030601]                                         | 0.80                 | 0.002   | 0.099           | 0.83                  | 0.026   | 0.471           |
| <b>Timp1</b>                    | NM_001044384             | ref Mus musculus tissue inhibitor of metalloproteinase 1 (Timp1), transcript variant 1, mRNA [NM_001044384]             | 1.78                 | 0.002   | 0.099           | 1.17                  | 0.013   | 0.412           |
| <b>Nrxn2</b>                    | NM_020253                | ref Mus musculus neurexin II (Nrxn2), mRNA [NM_020253]                                                                  | 0.60                 | 0.002   | 0.099           | 0.42                  | 0.011   | 0.407           |
| <b>Slc10a3</b>                  | NM_145406                | ref Mus musculus solute carrier family 10 (sodium/bile acid cotransporter family), member 3 (Slc10a3), mRNA [NM_145406] | 0.30                 | 0.002   | 0.100           | 0.26                  | 0.041   | 0.507           |
| <b>Tinagl1</b>                  | NM_023476                | ref Mus musculus tubulointerstitial nephritis antigen-like 1 (Tinagl1), transcript variant 1, mRNA [NM_023476]          | 0.73                 | 0.002   | 0.100           | 0.76                  | 0.027   | 0.472           |
| <b>Baiap2l1</b>                 | NM_025833                | ref Mus musculus BAI1-associated protein 2-like 1 (Baiap2l1), mRNA [NM_025833]                                          | 0.42                 | 0.002   | 0.100           | 0.26                  | 0.037   | 0.496           |
| <b>Gdnf</b>                     | NM_010275                | ref Mus musculus glial cell line derived neurotrophic factor (Gdnf), mRNA [NM_010275]                                   | 0.59                 | 0.002   | 0.101           | 0.75                  | 0.036   | 0.495           |
| <b>Cilp</b>                     | NM_173385                | ref Mus musculus cartilage intermediate layer protein, nucleotide pyrophosphohydrolase (Cilp), mRNA [NM_173385]         | 1.41                 | 0.002   | 0.102           | 0.90                  | 0.002   | 0.279           |
| <b>Rbp1</b>                     | NM_011254                | ref Mus musculus retinol binding protein 1, cellular (Rbp1), mRNA [NM_011254]                                           | 0.53                 | 0.002   | 0.102           | 0.29                  | 0.045   | 0.513           |

| Online Supplemental Table IV: mG4H-STZ and Con-STZ Both |                           |                                                                                                                               |                      |         |                 |                       |         |                 |
|---------------------------------------------------------|---------------------------|-------------------------------------------------------------------------------------------------------------------------------|----------------------|---------|-----------------|-----------------------|---------|-----------------|
| Gene Symbol                                             | RefSeq                    | Description                                                                                                                   | logFC<br>Con-<br>STZ | P-value | Adj.<br>P-value | logFC<br>mG4H-<br>STZ | P-value | Adj.<br>P-value |
| <b>Khk</b>                                              | NM_008439                 | ref Mus musculus ketohexokinase (Khk), mRNA [NM_008439]                                                                       | 0.38                 | 0.002   | 0.102           | 0.47                  | 0.000   | 0.157           |
| <b>Vat1</b>                                             | NM_012037                 | ref Mus musculus vesicle amine transport protein 1 homolog (T californica) (Vat1), mRNA [NM_012037]                           | 0.38                 | 0.002   | 0.102           | 0.30                  | 0.022   | 0.452           |
| <b>Tinagl1</b>                                          | NM_023476                 | ref Mus musculus tubulointerstitial nephritis antigen-like 1 (Tinagl1), transcript variant 1, mRNA [NM_023476]                | 0.75                 | 0.002   | 0.103           | 0.65                  | 0.021   | 0.449           |
| <b>Apod</b>                                             | NM_007470                 | ref Mus musculus apolipoprotein D (Apod), mRNA [NM_007470]                                                                    | 1.22                 | 0.002   | 0.103           | 1.03                  | 0.043   | 0.509           |
| <b>chr11:51003332-51033057_R</b>                        | chr11:51003332-51033057_R | lincRNA:chr11:51003332-51033057 reverse strand                                                                                | 0.95                 | 0.002   | 0.103           | 0.98                  | 0.008   | 0.391           |
| <b>Clca1</b>                                            | NM_009899                 | ref Mus musculus chloride channel calcium activated 1 (Clca1), mRNA [NM_009899]                                               | 0.65                 | 0.002   | 0.104           | 0.68                  | 0.046   | 0.513           |
| <b>B4galt1</b>                                          | NM_022305                 | ref Mus musculus UDP-Gal:betaGlcNAc beta 1,4-galactosyltransferase, polypeptide 1 (B4galt1), mRNA [NM_022305]                 | 0.44                 | 0.003   | 0.105           | 0.42                  | 0.011   | 0.406           |
| <b>Plin4</b>                                            | NM_020568                 | ref Mus musculus perilipin 4 (Plin4), mRNA [NM_020568]                                                                        | 0.76                 | 0.003   | 0.105           | 0.55                  | 0.046   | 0.513           |
| <b>Gm11488</b>                                          | XR_031206                 | ref PREDICTED: Mus musculus similar to heterogeneous nuclear ribonucleoprotein D-like (LOC623115), misc RNA [XR_031206]       | 0.46                 | 0.003   | 0.105           | 0.53                  | 0.010   | 0.401           |
| <b>Cnnm2</b>                                            | NM_033569                 | ref Mus musculus cyclin M2 (Cnnm2), transcript variant 1, mRNA [NM_033569]                                                    | 0.40                 | 0.003   | 0.105           | 0.36                  | 0.009   | 0.393           |
| <b>Dusp27</b>                                           | NM_001033344              | ref Mus musculus dual specificity phosphatase 27 (putative) (Dusp27), transcript variant 1, mRNA [NM_001033344]               | 0.35                 | 0.003   | 0.105           | 0.41                  | 0.006   | 0.369           |
| <b>C77080</b>                                           | NM_001033189              | ref Mus musculus expressed sequence C77080 (C77080), mRNA [NM_001033189]                                                      | 0.38                 | 0.003   | 0.105           | 0.30                  | 0.027   | 0.471           |
| <b>Ace2</b>                                             | NM_001130513              | ref Mus musculus angiotensin I converting enzyme (peptidyl-dipeptidase A) 2 (Ace2), transcript variant 1, mRNA [NM_001130513] | 0.70                 | 0.003   | 0.105           | 0.64                  | 0.046   | 0.513           |
| <b>Gtdc1</b>                                            | NM_172662                 | ref Mus musculus glycosyltransferase-like domain containing 1 (Gtdc1), mRNA [NM_172662]                                       | 0.32                 | 0.003   | 0.106           | 0.32                  | 0.038   | 0.499           |
| <b>Sorbs2</b>                                           | NM_172752                 | ref Mus musculus sorbin and SH3 domain containing 2 (Sorbs2), mRNA [NM_172752]                                                | 0.45                 | 0.003   | 0.106           | 0.31                  | 0.042   | 0.507           |

Online Supplemental Table IV: mG4H-STZ and Con-STZ Both

| Gene Symbol                       | RefSeq                     | Description                                                                                                                              | logFC<br>Con-<br>STZ | P-value | Adj.<br>P-value | logFC<br>mG4H-<br>STZ | P-value | Adj.<br>P-value |
|-----------------------------------|----------------------------|------------------------------------------------------------------------------------------------------------------------------------------|----------------------|---------|-----------------|-----------------------|---------|-----------------|
| <b>Fgl2</b>                       | NM_008013                  | ref[Mus musculus fibrinogen-like protein 2 (Fgl2), mRNA [NM_008013]                                                                      | 0.73                 | 0.003   | 0.106           | 0.42                  | 0.029   | 0.477           |
| <b>Gadd45b</b>                    | NM_008655                  | ref[Mus musculus growth arrest and DNA-damage-inducible 45 beta (Gadd45b), mRNA [NM_008655]                                              | 0.59                 | 0.003   | 0.109           | 0.43                  | 0.050   | 0.520           |
| <b>chr3:146515333-146557069_F</b> | chr3:146515333-146557069_F | lincRNA:chr3:146515333-146557069 forward strand                                                                                          | 0.59                 | 0.003   | 0.109           | 0.69                  | 0.011   | 0.406           |
| <b>Ppfibp1</b>                    | NM_001170433               | ref[Mus musculus PTPRF interacting protein, binding protein 1 (liprin beta 1) (Ppfibp1), transcript variant 1, mRNA [NM_001170433]       | 0.42                 | 0.003   | 0.109           | 0.44                  | 0.015   | 0.419           |
| <b>Gm2562</b>                     | XM_001473982               | ref[PREDICTED: Mus musculus similar to Ubtg protein (LOC100040033), mRNA [XM_001473982]                                                  | 1.34                 | 0.003   | 0.109           | 1.26                  | 0.008   | 0.391           |
| <b>Sox17</b>                      | NM_011441                  | ref[Mus musculus SRY-box containing gene 17 (Sox17), mRNA [NM_011441]                                                                    | 0.79                 | 0.003   | 0.111           | 0.82                  | 0.031   | 0.480           |
| <b>Star</b>                       | NM_011485                  | ref[Mus musculus steroidogenic acute regulatory protein (Star), nuclear gene encoding mitochondrial protein, mRNA [NM_011485]            | 0.83                 | 0.003   | 0.112           | 0.67                  | 0.015   | 0.421           |
| <b>Anxa1</b>                      | NM_010730                  | ref[Mus musculus annexin A1 (Anxa1), mRNA [NM_010730]                                                                                    | 0.50                 | 0.003   | 0.113           | 0.30                  | 0.020   | 0.443           |
| <b>Peci</b>                       | NM_011868                  | ref[Mus musculus peroxisomal delta3, delta2-enoyl-Coenzyme A isomerase (Peci), transcript variant 2, mRNA [NM_011868]                    | 0.40                 | 0.003   | 0.114           | 0.33                  | 0.023   | 0.456           |
| <b>Magi1</b>                      | NM_001029850               | ref[Mus musculus membrane associated guanylate kinase, WW and PDZ domain containing 1 (Magi1), transcript variant 3, mRNA [NM_001029850] | 0.43                 | 0.003   | 0.114           | 0.56                  | 0.042   | 0.507           |
| <b>chr9:118059348-118079494_F</b> | chr9:118059348-118079494_F | lincRNA:chr9:118059348-118079494 forward strand                                                                                          | 0.67                 | 0.003   | 0.114           | 0.56                  | 0.029   | 0.477           |
| <b>NEAT2</b>                      | NEAT2                      | lincRNA:chr19:5795689-5802671 reverse strand                                                                                             | 0.54                 | 0.003   | 0.115           | 0.58                  | 0.035   | 0.495           |
| <b>Tspo</b>                       | NM_009775                  | ref[Mus musculus translocator protein (Tspo), mRNA [NM_009775]                                                                           | 0.46                 | 0.003   | 0.115           | 0.43                  | 0.028   | 0.476           |
| <b>Srxn1</b>                      | NM_029688                  | ref[Mus musculus sulfiredoxin 1 homolog (S. cerevisiae) (Srxn1), mRNA [NM_029688]                                                        | 0.52                 | 0.003   | 0.115           | 0.39                  | 0.016   | 0.426           |
| <b>Mr1</b>                        | NM_008209                  | ref[Mus musculus major histocompatibility complex, class I-related (Mr1), mRNA [NM_008209]                                               | 0.40                 | 0.003   | 0.115           | 0.30                  | 0.028   | 0.475           |



| Online Supplemental Table IV: mG4H-STZ and Con-STZ Both |                            |                                                                                                                                                                                           |                      |         |                 |                       |         |                 |
|---------------------------------------------------------|----------------------------|-------------------------------------------------------------------------------------------------------------------------------------------------------------------------------------------|----------------------|---------|-----------------|-----------------------|---------|-----------------|
| Gene Symbol                                             | RefSeq                     | Description                                                                                                                                                                               | logFC<br>Con-<br>STZ | P-value | Adj.<br>P-value | logFC<br>mG4H-<br>STZ | P-value | Adj.<br>P-value |
| chr2:150496011-150496503_R                              | chr2:150496011-150496503_R | lincRNA:chr2:150496011-150496503 reverse strand                                                                                                                                           | 0.64                 | 0.003   | 0.116           | 0.61                  | 0.002   | 0.279           |
| Ifit2                                                   | NM_008332                  | ref Mus musculus interferon-induced protein with tetratricopeptide repeats 2 (Ifit2), mRNA [NM_008332]                                                                                    | 0.58                 | 0.003   | 0.116           | 0.41                  | 0.025   | 0.463           |
| Ugt1a6b                                                 | NM_201410                  | ref Mus musculus UDP glucuronosyltransferase 1 family, polypeptide A6B (Ugt1a6b), mRNA [NM_201410]                                                                                        | 0.59                 | 0.003   | 0.116           | 0.35                  | 0.029   | 0.477           |
| Sema3g                                                  | NM_001025379               | ref Mus musculus sema domain, immunoglobulin domain (Ig), short basic domain, secreted, (semaphorin) 3G (Sema3g), mRNA [NM_001025379]                                                     | 0.57                 | 0.003   | 0.116           | 0.55                  | 0.041   | 0.505           |
| Slc37a1                                                 | NM_153062                  | ref Mus musculus solute carrier family 37 (glycerol-3-phosphate transporter), member 1 (Slc37a1), mRNA [NM_153062]                                                                        | 0.51                 | 0.003   | 0.117           | 0.57                  | 0.002   | 0.271           |
| Pmm1                                                    | NM_013872                  | ref Mus musculus phosphomannomutase 1 (Pmm1), mRNA [NM_013872]                                                                                                                            | 0.61                 | 0.003   | 0.118           | 0.42                  | 0.022   | 0.450           |
| Ptpn14                                                  | NM_008976                  | ref Mus musculus protein tyrosine phosphatase, non-receptor type 14 (Ptpn14), mRNA [NM_008976]                                                                                            | 1.21                 | 0.003   | 0.118           | 0.88                  | 0.017   | 0.431           |
| Gm1078                                                  | ENSMUST00000144863         | ens Putative uncharacterized serine/threonine-protein kinase SgK110 (EC 2.7.11.1)(Sugen kinase 110) [Source:UniProtKB/Swiss-Prot;Acc:P0C5K0] [ENSMUST00000144863]                         | 1.57                 | 0.003   | 0.118           | 1.42                  | 0.013   | 0.412           |
| Hecw2                                                   | NM_001001883               | ref Mus musculus HECT, C2 and WW domain containing E3 ubiquitin protein ligase 2 (Hecw2), transcript variant 1, mRNA [NM_001001883]                                                       | 0.59                 | 0.003   | 0.119           | 0.39                  | 0.027   | 0.471           |
| Tor3a                                                   | NM_023141                  | ref Mus musculus torsin family 3, member A (Tor3a), mRNA [NM_023141]                                                                                                                      | 0.55                 | 0.003   | 0.123           | 0.52                  | 0.008   | 0.391           |
| Qsox1                                                   | NM_001024945               | ref Mus musculus quiescin Q6 sulfhydryl oxidase 1 (Qsox1), transcript variant 1, mRNA [NM_001024945]                                                                                      | 0.67                 | 0.003   | 0.124           | 0.52                  | 0.026   | 0.469           |
| 4930415C11Rik                                           | AI606402                   | gb mr62b05.y1 Stratagene mouse testis (#937308) Mus musculus cDNA clone IMAGE:602001 5' similar to gb:J03952 Mouse, glutathione transferase GT8.7 mRNA, complete cds (MOUSE);. [AI606402] | 0.51                 | 0.003   | 0.124           | 0.54                  | 0.037   | 0.496           |

Online Supplemental Table IV: mG4H-STZ and Con-STZ Both

| Gene Symbol                        | RefSeq                      | Description                                                                                                  | logFC<br>Con-<br>STZ | P-value | Adj.<br>P-value | logFC<br>mG4H-<br>STZ | P-value | Adj.<br>P-value |
|------------------------------------|-----------------------------|--------------------------------------------------------------------------------------------------------------|----------------------|---------|-----------------|-----------------------|---------|-----------------|
| <b>ENSMUST00000114667</b>          | ENSMUST00000114667          | ens teashirt zinc finger family member 1 Gene [Source:MGI Symbol;Acc:MGI:1346031] [ENSMUST00000114667]       | 0.35                 | 0.003   | 0.124           | 0.48                  | 0.009   | 0.398           |
| <b>Adamtsl4</b>                    | NM_144899                   | ref Mus musculus ADAMTS-like 4 (Adamtsl4), mRNA [NM_144899]                                                  | 0.41                 | 0.003   | 0.124           | 0.42                  | 0.021   | 0.449           |
| <b>Slc40a1</b>                     | NM_016917                   | ref Mus musculus solute carrier family 40 (iron-regulated transporter), member 1 (Slc40a1), mRNA [NM_016917] | 0.43                 | 0.003   | 0.124           | 0.30                  | 0.031   | 0.482           |
| <b>Ehd4</b>                        | NM_133838                   | ref Mus musculus EH-domain containing 4 (Ehd4), mRNA [NM_133838]                                             | 0.38                 | 0.004   | 0.127           | 0.44                  | 0.003   | 0.305           |
| <b>Pdzk1ip1</b>                    | NM_001164557                | ref Mus musculus PDZK1 interacting protein 1 (Pdzk1ip1), transcript variant 1, mRNA [NM_001164557]           | 0.52                 | 0.004   | 0.127           | 0.44                  | 0.010   | 0.404           |
| <b>Tlr7</b>                        | NM_133211                   | ref Mus musculus toll-like receptor 7 (Tlr7), mRNA [NM_133211]                                               | 0.57                 | 0.004   | 0.128           | 0.73                  | 0.002   | 0.281           |
| <b>Itgb5</b>                       | NM_010580                   | ref Mus musculus integrin beta 5 (Itgb5), transcript variant 2, mRNA [NM_010580]                             | 0.34                 | 0.004   | 0.128           | 0.38                  | 0.009   | 0.398           |
| <b>Sfxn3</b>                       | NM_053197                   | ref Mus musculus sideroflexin 3 (Sfxn3), transcript variant 1, mRNA [NM_053197]                              | 0.34                 | 0.004   | 0.128           | 0.21                  | 0.042   | 0.507           |
| <b>Klhl13</b>                      | NM_026167                   | ref Mus musculus kelch-like 13 (Drosophila) (Klhl13), mRNA [NM_026167]                                       | 0.41                 | 0.004   | 0.128           | 0.46                  | 0.025   | 0.467           |
| <b>Ear1</b>                        | NM_007894                   | ref Mus musculus eosinophil-associated, ribonuclease A family, member 1 (Ear1), mRNA [NM_007894]             | 0.84                 | 0.004   | 0.129           | 1.15                  | 0.015   | 0.423           |
| <b>chr11:104304424-104329824_F</b> | chr11:104304424-104329824_F | lincRNA:chr11:104304424-104329824 forward strand                                                             | 0.70                 | 0.004   | 0.129           | 0.56                  | 0.043   | 0.509           |
| <b>Sltm</b>                        | NM_026337                   | ref Mus musculus SAFB-like, transcription modulator (Sltm), transcript variant 2, mRNA [NM_026337]           | 0.27                 | 0.004   | 0.129           | 0.33                  | 0.032   | 0.485           |
| <b>Drap1</b>                       | NM_024176                   | ref Mus musculus Dr1 associated protein 1 (negative cofactor 2 alpha) (Drap1), mRNA [NM_024176]              | 0.35                 | 0.004   | 0.129           | 0.38                  | 0.012   | 0.409           |
| <b>chr17:85418489-85427364_F</b>   | chr17:85418489-85427364_F   | lincRNA:chr17:85418489-85427364 forward strand                                                               | 0.50                 | 0.004   | 0.129           | 0.65                  | 0.043   | 0.511           |
| <b>Itgb1</b>                       | NM_010578                   | ref Mus musculus integrin beta 1 (fibronectin receptor beta) (Itgb1), mRNA [NM_010578]                       | 0.32                 | 0.004   | 0.130           | 0.29                  | 0.025   | 0.465           |

Online Supplemental Table IV: mG4H-STZ and Con-STZ Both

| Gene Symbol                      | RefSeq                    | Description                                                                                                                         | logFC<br>Con-<br>STZ | P-value | Adj.<br>P-value | logFC<br>mG4H-<br>STZ | P-value | Adj.<br>P-value |
|----------------------------------|---------------------------|-------------------------------------------------------------------------------------------------------------------------------------|----------------------|---------|-----------------|-----------------------|---------|-----------------|
| <b>1700012B15Rik</b>             | NR_015551                 | ref Mus musculus RIKEN cDNA 1700012B15 gene (1700012B15Rik), non-coding RNA [NR_015551]                                             | 0.46                 | 0.004   | 0.130           | 0.45                  | 0.039   | 0.499           |
| <b>Ddi2</b>                      | NM_001017966              | ref Mus musculus DNA-damage inducible protein 2 (Ddi2), mRNA [NM_001017966]                                                         | 0.43                 | 0.004   | 0.130           | 0.54                  | 0.015   | 0.420           |
| <b>chr10:97196521-97207471_F</b> | chr10:97196521-97207471_F | lincRNA:chr10:97196521-97207471 forward strand                                                                                      | 0.65                 | 0.004   | 0.131           | 0.51                  | 0.018   | 0.435           |
| <b>Trpm7</b>                     | NM_021450                 | ref Mus musculus transient receptor potential cation channel, subfamily M, member 7 (Trpm7), transcript variant 1, mRNA [NM_021450] | 0.38                 | 0.004   | 0.131           | 0.41                  | 0.015   | 0.419           |
| <b>Tmed5</b>                     | NM_028876                 | ref Mus musculus transmembrane emp24 protein transport domain containing 5 (Tmed5), mRNA [NM_028876]                                | 0.43                 | 0.004   | 0.132           | 0.38                  | 0.022   | 0.452           |
| <b>Hif3a</b>                     | NM_016868                 | ref Mus musculus hypoxia inducible factor 3, alpha subunit (Hif3a), transcript variant 2, mRNA [NM_016868]                          | 1.09                 | 0.004   | 0.134           | 0.77                  | 0.032   | 0.485           |
| <b>Gm12824</b>                   | NM_001085549              | ref Mus musculus predicted gene 12824 (Gm12824), mRNA [NM_001085549]                                                                | 0.43                 | 0.004   | 0.135           | 0.58                  | 0.030   | 0.477           |
| <b>Dusp4</b>                     | NM_176933                 | ref Mus musculus dual specificity phosphatase 4 (Dusp4), mRNA [NM_176933]                                                           | 0.67                 | 0.004   | 0.135           | 1.06                  | 0.024   | 0.463           |
| <b>Ddi2</b>                      | NM_001017966              | ref Mus musculus DNA-damage inducible protein 2 (Ddi2), mRNA [NM_001017966]                                                         | 0.49                 | 0.004   | 0.136           | 0.57                  | 0.021   | 0.450           |
| <b>Bnip3</b>                     | NM_009760                 | ref Mus musculus BCL2/adenovirus E1B interacting protein 3 (Bnip3), nuclear gene encoding mitochondrial protein, mRNA [NM_009760]   | 0.60                 | 0.004   | 0.136           | 0.70                  | 0.011   | 0.407           |
| <b>Gja4</b>                      | NM_008120                 | ref Mus musculus gap junction protein, alpha 4 (Gja4), mRNA [NM_008120]                                                             | 0.38                 | 0.004   | 0.137           | 0.51                  | 0.031   | 0.480           |
| <b>Fam46a</b>                    | NM_001160378              | ref Mus musculus family with sequence similarity 46, member A (Fam46a), transcript variant 1, mRNA [NM_001160378]                   | 0.93                 | 0.004   | 0.137           | 0.98                  | 0.020   | 0.447           |
| <b>Acbd5</b>                     | NM_028793                 | ref Mus musculus acyl-Coenzyme A binding domain containing 5 (Acbd5), transcript variant 3, mRNA [NM_028793]                        | 0.31                 | 0.004   | 0.137           | 0.26                  | 0.043   | 0.510           |
| <b>Klf11</b>                     | NM_178357                 | ref Mus musculus Kruppel-like factor 11 (Klf11), mRNA [NM_178357]                                                                   | 0.47                 | 0.004   | 0.138           | 0.58                  | 0.010   | 0.400           |

Online Supplemental Table IV: mG4H-STZ and Con-STZ Both

| Gene Symbol                       | RefSeq                     | Description                                                                                                   | logFC<br>Con-<br>STZ | P-value | Adj.<br>P-value | logFC<br>mG4H-<br>STZ | P-value | Adj.<br>P-value |
|-----------------------------------|----------------------------|---------------------------------------------------------------------------------------------------------------|----------------------|---------|-----------------|-----------------------|---------|-----------------|
| <b>Tnfrsf1a</b>                   | NM_011609                  | ref Mus musculus tumor necrosis factor receptor superfamily, member 1a (Tnfrsf1a), mRNA [NM_011609]           | 0.43                 | 0.004   | 0.138           | 0.34                  | 0.035   | 0.493           |
| <b>Lin28a</b>                     | NM_145833                  | ref Mus musculus lin-28 homolog A (C. elegans) (Lin28a), mRNA [NM_145833]                                     | 0.41                 | 0.004   | 0.138           | 0.48                  | 0.008   | 0.390           |
| <b>Hsf4</b>                       | NM_011939                  | ref Mus musculus heat shock transcription factor 4 (Hsf4), mRNA [NM_011939]                                   | 0.35                 | 0.004   | 0.138           | 0.39                  | 0.037   | 0.496           |
| <b>Tnfaip6</b>                    | NM_009398                  | ref Mus musculus tumor necrosis factor alpha induced protein 6 (Tnfaip6), mRNA [NM_009398]                    | 0.84                 | 0.004   | 0.139           | 0.76                  | 0.021   | 0.447           |
| <b>Itga5</b>                      | NM_010577                  | ref Mus musculus integrin alpha 5 (fibronectin receptor alpha) (Itga5), mRNA [NM_010577]                      | 0.56                 | 0.004   | 0.139           | 0.48                  | 0.044   | 0.512           |
| <b>B4galt1</b>                    | NM_022305                  | ref Mus musculus UDP-Gal:betaGlcNAc beta 1,4-galactosyltransferase, polypeptide 1 (B4galt1), mRNA [NM_022305] | 0.33                 | 0.004   | 0.139           | 0.38                  | 0.003   | 0.281           |
| <b>Pcdh20</b>                     | NM_178685                  | ref Mus musculus protocadherin 20 (Pcdh20), mRNA [NM_178685]                                                  | 0.66                 | 0.004   | 0.140           | 0.73                  | 0.005   | 0.346           |
| <b>Clip1</b>                      | NM_019765                  | ref Mus musculus CAP-GLY domain containing linker protein 1 (Clip1), mRNA [NM_019765]                         | 0.48                 | 0.004   | 0.140           | 0.40                  | 0.032   | 0.483           |
| <b>Spock2</b>                     | NM_052994                  | ref Mus musculus sparc/osteonectin, cwcv and kazal-like domains proteoglycan 2 (Spock2), mRNA [NM_052994]     | 1.13                 | 0.004   | 0.140           | 1.35                  | 0.011   | 0.407           |
| <b>Pdlim3</b>                     | NM_016798                  | ref Mus musculus PDZ and LIM domain 3 (Pdlim3), mRNA [NM_016798]                                              | 0.84                 | 0.004   | 0.140           | 0.60                  | 0.017   | 0.434           |
| <b>Gm3804</b>                     | XM_001478041               | ref PREDICTED: Mus musculus similar to pol protein (LOC100042361), mRNA [XM_001478041]                        | 1.02                 | 0.004   | 0.141           | 0.92                  | 0.038   | 0.498           |
| <b>Acsf2</b>                      | NM_153807                  | ref Mus musculus acyl-CoA synthetase family member 2 (Acsf2), mRNA [NM_153807]                                | 0.62                 | 0.005   | 0.143           | 0.56                  | 0.041   | 0.507           |
| <b>Mgst1</b>                      | NM_019946                  | ref Mus musculus microsomal glutathione S-transferase 1 (Mgst1), mRNA [NM_019946]                             | 0.77                 | 0.005   | 0.143           | 0.84                  | 0.006   | 0.369           |
| <b>chr4:146507925-146532650_R</b> | chr4:146507925-146532650_R | lincRNA:chr4:146507925-146532650 reverse strand                                                               | 0.43                 | 0.005   | 0.143           | 0.48                  | 0.029   | 0.477           |
| <b>Mt1</b>                        | NM_013602                  | ref Mus musculus metallothionein 1 (Mt1), mRNA [NM_013602]                                                    | 0.94                 | 0.005   | 0.144           | 0.82                  | 0.042   | 0.507           |
| <b>Efhd2</b>                      | NM_025994                  | ref Mus musculus EF hand domain containing 2 (Efhd2), mRNA [NM_025994]                                        | 0.75                 | 0.005   | 0.144           | 0.71                  | 0.007   | 0.371           |

| Online Supplemental Table IV: mG4H-STZ and Con-STZ Both |                          |                                                                                                                                                         |                      |         |                 |                       |         |                 |
|---------------------------------------------------------|--------------------------|---------------------------------------------------------------------------------------------------------------------------------------------------------|----------------------|---------|-----------------|-----------------------|---------|-----------------|
| Gene Symbol                                             | RefSeq                   | Description                                                                                                                                             | logFC<br>Con-<br>STZ | P-value | Adj.<br>P-value | logFC<br>mG4H-<br>STZ | P-value | Adj.<br>P-value |
| <b>ENSMUST00000036858</b>                               | ENSMUST00000036858       | ens ankyrin repeat and SOCS box-containing 11 Gene [Source:MGI (curated);Acc:MGI:1916104] [ENSMUST00000036858]                                          | 0.42                 | 0.005   | 0.144           | 0.45                  | 0.022   | 0.452           |
| <b>EG214403</b>                                         | NM_001029977             | ref Mus musculus predicted gene, EG214403 (EG214403), transcript variant 1, mRNA [NM_001029977]                                                         | 0.74                 | 0.005   | 0.144           | 0.61                  | 0.047   | 0.514           |
| <b>Sqstm1</b>                                           | NM_011018                | ref Mus musculus sequestosome 1 (Sqstm1), mRNA [NM_011018]                                                                                              | 0.57                 | 0.005   | 0.144           | 0.59                  | 0.049   | 0.519           |
| <b>Txnrd1</b>                                           | NM_001042523             | ref Mus musculus thioredoxin reductase 1 (Txnrd1), transcript variant 1, mRNA [NM_001042523]                                                            | 0.50                 | 0.005   | 0.145           | 0.48                  | 0.012   | 0.408           |
| <b>Tmed5</b>                                            | NM_028876                | ref Mus musculus transmembrane emp24 protein transport domain containing 5 (Tmed5), mRNA [NM_028876]                                                    | 0.43                 | 0.005   | 0.145           | 0.44                  | 0.019   | 0.441           |
| <b>A130040M12Rik</b>                                    | NR_002860                | ref Mus musculus RIKEN cDNA A130040M12 gene (A130040M12Rik), non-coding RNA [NR_002860]                                                                 | 1.75                 | 0.005   | 0.145           | 1.65                  | 0.015   | 0.418           |
| <b>chr3:30754871-30776438_F</b>                         | chr3:30754871-30776438_F | lincRNA:chr3:30754871-30776438 forward strand                                                                                                           | 0.56                 | 0.005   | 0.145           | 0.66                  | 0.010   | 0.400           |
| <b>Srpx2</b>                                            | NM_026838                | ref Mus musculus sushi-repeat-containing protein, X-linked 2 (Srpx2), transcript variant 1, mRNA [NM_026838]                                            | 0.63                 | 0.005   | 0.145           | 0.75                  | 0.003   | 0.303           |
| <b>C130057D09Rik</b>                                    | AK081630                 | gb Mus musculus 16 days embryo head cDNA, RIKEN full-length enriched library, clone:C130057D09 product:unclassifiable, full insert sequence. [AK081630] | 0.45                 | 0.005   | 0.145           | 0.31                  | 0.025   | 0.467           |
| <b>Rab43</b>                                            | NM_001039394             | ref Mus musculus RAB43, member RAS oncogene family (Rab43), transcript variant 1, mRNA [NM_001039394]                                                   | 0.29                 | 0.005   | 0.145           | 0.34                  | 0.007   | 0.379           |
| <b>Pdcd6ip</b>                                          | NM_001164677             | ref Mus musculus programmed cell death 6 interacting protein (Pdcd6ip), transcript variant 1, mRNA [NM_001164677]                                       | 0.35                 | 0.005   | 0.145           | 0.36                  | 0.020   | 0.443           |
| <b>Nr1d1</b>                                            | NM_145434                | ref Mus musculus nuclear receptor subfamily 1, group D, member 1 (Nr1d1), mRNA [NM_145434]                                                              | 0.46                 | 0.005   | 0.145           | 0.75                  | 0.029   | 0.477           |
| <b>Plbd1</b>                                            | NM_025806                | ref Mus musculus phospholipase B domain containing 1 (Plbd1), mRNA [NM_025806]                                                                          | 0.37                 | 0.005   | 0.145           | 0.30                  | 0.013   | 0.412           |
| <b>Cul4b</b>                                            | NM_001110142             | ref Mus musculus cullin 4B (Cul4b), transcript variant 2, mRNA [NM_001110142]                                                                           | 0.33                 | 0.005   | 0.146           | 0.32                  | 0.034   | 0.493           |

Online Supplemental Table IV: mG4H-STZ and Con-STZ Both

| Gene Symbol                       | RefSeq                     | Description                                                                                                    | logFC<br>Con-<br>STZ | P-value | Adj.<br>P-value | logFC<br>mG4H-<br>STZ | P-value | Adj.<br>P-value |
|-----------------------------------|----------------------------|----------------------------------------------------------------------------------------------------------------|----------------------|---------|-----------------|-----------------------|---------|-----------------|
| <b>Gata6</b>                      | NM_010258                  | ref Mus musculus GATA binding protein 6 (Gata6), mRNA [NM_010258]                                              | 0.37                 | 0.005   | 0.146           | 0.35                  | 0.044   | 0.512           |
| <b>Jund</b>                       | NM_010592                  | ref Mus musculus Jun proto-oncogene related gene d (Jund), mRNA [NM_010592]                                    | 0.35                 | 0.005   | 0.146           | 0.31                  | 0.018   | 0.435           |
| <b>Peg3</b>                       | NM_008817                  | ref Mus musculus paternally expressed 3 (Peg3), mRNA [NM_008817]                                               | 0.56                 | 0.005   | 0.146           | 0.42                  | 0.016   | 0.427           |
| <b>Bcl2l1</b>                     | NM_009743                  | ref Mus musculus BCL2-like 1 (Bcl2l1), nuclear gene encoding mitochondrial protein, mRNA [NM_009743]           | 0.79                 | 0.005   | 0.147           | 0.91                  | 0.025   | 0.466           |
| <b>BC023263</b>                   | BC023263                   | gb Mus musculus, clone IMAGE:3979169, mRNA. [BC023263]                                                         | 0.29                 | 0.005   | 0.148           | 0.22                  | 0.045   | 0.513           |
| <b>5430410E06Rik</b>              | XM_001475205               | ref PREDICTED: Mus musculus RIKEN cDNA 5430410E06 gene (5430410E06Rik), mRNA [XM_001475205]                    | 0.31                 | 0.005   | 0.149           | 0.33                  | 0.045   | 0.513           |
| <b>Ngef</b>                       | NM_001111314               | ref Mus musculus neuronal guanine nucleotide exchange factor (Ngef), transcript variant 1, mRNA [NM_001111314] | 0.95                 | 0.005   | 0.149           | 0.50                  | 0.011   | 0.406           |
| <b>chr1:138570107-138632310_R</b> | chr1:138570107-138632310_R | lincRNA:chr1:138570107-138632310 reverse strand                                                                | 0.49                 | 0.005   | 0.150           | 0.77                  | 0.000   | 0.090           |
| <b>Cxcl1</b>                      | NM_008176                  | ref Mus musculus chemokine (C-X-C motif) ligand 1 (Cxcl1), mRNA [NM_008176]                                    | 0.77                 | 0.005   | 0.152           | 0.73                  | 0.036   | 0.495           |
| <b>Usp47</b>                      | NM_133758                  | ref Mus musculus ubiquitin specific peptidase 47 (Usp47), mRNA [NM_133758]                                     | 0.29                 | 0.005   | 0.152           | 0.40                  | 0.005   | 0.354           |
| <b>Psat1</b>                      | NM_177420                  | ref Mus musculus phosphoserine aminotransferase 1 (Psat1), mRNA [NM_177420]                                    | 0.63                 | 0.005   | 0.152           | 0.46                  | 0.039   | 0.499           |
| <b>Gda</b>                        | NM_010266                  | ref Mus musculus guanine deaminase (Gda), mRNA [NM_010266]                                                     | 0.46                 | 0.005   | 0.153           | 0.39                  | 0.040   | 0.501           |
| <b>Inhba</b>                      | NM_008380                  | ref Mus musculus inhibin beta-A (Inhba), mRNA [NM_008380]                                                      | 0.70                 | 0.005   | 0.154           | 0.65                  | 0.000   | 0.104           |
| <b>Trnp1</b>                      | NM_001081156               | ref Mus musculus TMF1-regulated nuclear protein 1 (Trnp1), mRNA [NM_001081156]                                 | 0.78                 | 0.005   | 0.154           | 0.69                  | 0.014   | 0.412           |
| <b>Rps6ka3</b>                    | NM_148945                  | ref Mus musculus ribosomal protein S6 kinase polypeptide 3 (Rps6ka3), mRNA [NM_148945]                         | 0.31                 | 0.005   | 0.154           | 0.38                  | 0.015   | 0.418           |



Online Supplemental Table IV: mG4H-STZ and Con-STZ Both

| Gene Symbol               | RefSeq             | Description                                                                                                                                                    | logFC<br>Con-<br>STZ | P-value | Adj.<br>P-value | logFC<br>mG4H-<br>STZ | P-value | Adj.<br>P-value |
|---------------------------|--------------------|----------------------------------------------------------------------------------------------------------------------------------------------------------------|----------------------|---------|-----------------|-----------------------|---------|-----------------|
| <b>LOC100039402</b>       | XM_001472829       | ref PREDICTED: Mus musculus similar to pol protein (LOC100039402), mRNA [XM_001472829]                                                                         | 1.50                 | 0.005   | 0.155           | 1.46                  | 0.011   | 0.406           |
| <b>Stat3</b>              | NM_011486          | ref Mus musculus signal transducer and activator of transcription 3 (Stat3), transcript variant 3, mRNA [NM_011486]                                            | 0.45                 | 0.005   | 0.156           | 0.51                  | 0.023   | 0.454           |
| <b>ENSMUST00000071053</b> | ENSMUST00000071053 | ens RIKEN cDNA A730036I17 gene Gene [Source:MGI Symbol;Acc:MGI:3041182] [ENSMUST00000071053]                                                                   | 0.54                 | 0.005   | 0.156           | 0.48                  | 0.006   | 0.369           |
| <b>Ppp1r12c</b>           | NM_029834          | ref Mus musculus protein phosphatase 1, regulatory (inhibitor) subunit 12C (Ppp1r12c), mRNA [NM_029834]                                                        | 0.61                 | 0.005   | 0.156           | 0.57                  | 0.014   | 0.418           |
| <b>Leprel1</b>            | NM_173379          | ref Mus musculus leprecan-like 1 (Leprel1), mRNA [NM_173379]                                                                                                   | 0.68                 | 0.006   | 0.157           | 0.57                  | 0.013   | 0.412           |
| <b>Glipr1</b>             | NM_028608          | ref Mus musculus GII pathogenesis-related 1 (glioma) (Glipr1), mRNA [NM_028608]                                                                                | 0.62                 | 0.006   | 0.157           | 0.44                  | 0.023   | 0.453           |
| <b>Ptgs2</b>              | NM_011198          | ref Mus musculus prostaglandin-endoperoxide synthase 2 (Ptgs2), mRNA [NM_011198]                                                                               | 0.49                 | 0.006   | 0.157           | 0.55                  | 0.013   | 0.412           |
| <b>Wnt9b</b>              | NM_011719          | ref Mus musculus wingless-type MMTV integration site 9B (Wnt9b), mRNA [NM_011719]                                                                              | 0.45                 | 0.006   | 0.157           | 0.44                  | 0.017   | 0.429           |
| <b>1700084D21Rik</b>      | XM_001000188       | ref PREDICTED: Mus musculus RIKEN cDNA 1700084D21 gene (1700084D21Rik), mRNA [XM_001000188]                                                                    | 0.50                 | 0.006   | 0.158           | 0.37                  | 0.030   | 0.477           |
| <b>C030011L09Rik</b>      | AK021067           | gb Mus musculus adult male corpus striatum cDNA, RIKEN full-length enriched library, clone:C030011L09 product:unclassifiable, full insert sequence. [AK021067] | 0.53                 | 0.006   | 0.158           | 0.61                  | 0.004   | 0.308           |
| <b>Myd88</b>              | NM_010851          | ref Mus musculus myeloid differentiation primary response gene 88 (Myd88), mRNA [NM_010851]                                                                    | 0.33                 | 0.006   | 0.158           | 0.30                  | 0.008   | 0.391           |
| <b>Gpr176</b>             | NM_201367          | ref Mus musculus G protein-coupled receptor 176 (Gpr176), mRNA [NM_201367]                                                                                     | 0.63                 | 0.006   | 0.159           | 0.36                  | 0.047   | 0.515           |
| <b>D630024D03Rik</b>      | AK158188           | gb Mus musculus adult inner ear cDNA, RIKEN full-length enriched library, clone:F930039G01 product:unclassifiable, full insert sequence. [AK158188]            | 0.64                 | 0.006   | 0.159           | 0.55                  | 0.009   | 0.393           |
| <b>ENSMUST00000112253</b> | ENSMUST00000112253 | ens Von Willebrand factor homolog Gene [Source:MGI (curated);Acc:MGI:98941] [ENSMUST00000112253]                                                               | 0.46                 | 0.006   | 0.161           | 0.39                  | 0.004   | 0.324           |

| Online Supplemental Table IV: mG4H-STZ and Con-STZ Both |                            |                                                                                                                          |                      |         |                 |                       |         |                 |
|---------------------------------------------------------|----------------------------|--------------------------------------------------------------------------------------------------------------------------|----------------------|---------|-----------------|-----------------------|---------|-----------------|
| Gene Symbol                                             | RefSeq                     | Description                                                                                                              | logFC<br>Con-<br>STZ | P-value | Adj.<br>P-value | logFC<br>mG4H-<br>STZ | P-value | Adj.<br>P-value |
| <b>Dedd2</b>                                            | NM_207677                  | ref Mus musculus death effector domain-containing DNA binding protein 2 (Dedd2), mRNA [NM_207677]                        | 0.33                 | 0.006   | 0.162           | 0.45                  | 0.023   | 0.453           |
| <b>Uvrag</b>                                            | NM_178635                  | ref Mus musculus UV radiation resistance associated gene (Uvrag), mRNA [NM_178635]                                       | 0.54                 | 0.006   | 0.162           | 0.61                  | 0.004   | 0.325           |
| <b>Raph1</b>                                            | XM_001479477               | ref PREDICTED: Mus musculus Ras association (RalGDS/AF-6) and pleckstrin homology domains 1 (Raph1), mRNA [XM_001479477] | 0.57                 | 0.006   | 0.162           | 1.05                  | 0.017   | 0.433           |
| <b>Gm4080</b>                                           | XM_001478955               | ref PREDICTED: Mus musculus similar to pol protein (LOC100042868), mRNA [XM_001478955]                                   | 1.57                 | 0.006   | 0.162           | 1.57                  | 0.009   | 0.397           |
| <b>Olfir714</b>                                         | NM_147033                  | ref Mus musculus olfactory receptor 714 (Olfir714), mRNA [NM_147033]                                                     | 1.20                 | 0.006   | 0.162           | 0.91                  | 0.011   | 0.407           |
| <b>ENSMUST00000100759</b>                               | ENSMUST00000100759         | ref  PREDICTED: Mus musculus similar to Sycp3 like Y-linked, transcript variant 2 (LOC100042050), mRNA [XM_001476868]    | 0.46                 | 0.006   | 0.164           | 0.32                  | 0.046   | 0.513           |
| <b>Hmox1</b>                                            | NM_010442                  | ref Mus musculus heme oxygenase (decycling) 1 (Hmox1), mRNA [NM_010442]                                                  | 0.54                 | 0.006   | 0.164           | 0.59                  | 0.044   | 0.512           |
| <b>Apold1</b>                                           | NM_001109914               | ref Mus musculus apolipoprotein L domain containing 1 (Apold1), mRNA [NM_001109914]                                      | 0.53                 | 0.006   | 0.165           | 0.73                  | 0.019   | 0.437           |
| <b>Ttll7</b>                                            | NM_027594                  | ref Mus musculus tubulin tyrosine ligase-like family, member 7 (Ttll7), mRNA [NM_027594]                                 | 0.68                 | 0.006   | 0.165           | 0.58                  | 0.049   | 0.519           |
| <b>Syt2</b>                                             | NM_009307                  | ref Mus musculus synaptotagmin II (Syt2), mRNA [NM_009307]                                                               | 0.89                 | 0.006   | 0.166           | 0.69                  | 0.021   | 0.450           |
| <b>chr9:113676535-113677163_F</b>                       | chr9:113676535-113677163_F | lincRNA:chr9:113676535-113677163 forward strand                                                                          | 0.49                 | 0.006   | 0.166           | 0.30                  | 0.041   | 0.507           |
| <b>Crlf1</b>                                            | NM_018827                  | ref Mus musculus cytokine receptor-like factor 1 (Crlf1), mRNA [NM_018827]                                               | 0.76                 | 0.006   | 0.166           | 0.67                  | 0.033   | 0.490           |
| <b>Pawr</b>                                             | NM_054056                  | ref Mus musculus PRKC, apoptosis, WT1, regulator (Pawr), mRNA [NM_054056]                                                | 0.46                 | 0.006   | 0.166           | 0.46                  | 0.048   | 0.516           |
| <b>ENSMUST00000061419</b>                               | ENSMUST00000061419         | ens Myelin expression factor 2 (MyEF-2)(MEF-2) [Source:UniProtKB/Swiss-Prot;Acc:Q8C854] [ENSMUST00000061419]             | 0.57                 | 0.006   | 0.166           | 0.50                  | 0.014   | 0.418           |

| Online Supplemental Table IV: mG4H-STZ and Con-STZ Both |                           |                                                                                                                                                         |                      |         |                 |                       |         |                 |
|---------------------------------------------------------|---------------------------|---------------------------------------------------------------------------------------------------------------------------------------------------------|----------------------|---------|-----------------|-----------------------|---------|-----------------|
| Gene Symbol                                             | RefSeq                    | Description                                                                                                                                             | logFC<br>Con-<br>STZ | P-value | Adj.<br>P-value | logFC<br>mG4H-<br>STZ | P-value | Adj.<br>P-value |
| 2310044G17Rik                                           | NM_173735                 | ref Mus musculus RIKEN cDNA 2310044G17 gene (2310044G17Rik), transcript variant 1, mRNA [NM_173735]                                                     | 0.44                 | 0.006   | 0.168           | 0.56                  | 0.037   | 0.496           |
| ENSMUST00000098457                                      | ENSMUST00000098457        | ens microtubule associated monooxygenase, calponin and LIM domain containing 3 Gene [Source:MGI (curated);Acc:MGI:2442733] [ENSMUST00000098457]         | 0.27                 | 0.006   | 0.169           | 0.26                  | 0.013   | 0.412           |
| Galnt6                                                  | NM_001161767              | ref Mus musculus UDP-N-acetyl-alpha-D-galactosamine:polypeptide N-acetylgalactosaminyltransferase 6 (Galnt6), transcript variant 1, mRNA [NM_001161767] | 0.65                 | 0.006   | 0.170           | 0.66                  | 0.034   | 0.493           |
| chr16:90038086-90127636_F                               | chr16:90038086-90127636_F | lincRNA:chr16:90038086-90127636 forward strand                                                                                                          | 0.65                 | 0.006   | 0.170           | 0.59                  | 0.049   | 0.519           |
| chr13:70745306-70837331_R                               | chr13:70745306-70837331_R | lincRNA:chr13:70745306-70837331 reverse strand                                                                                                          | 0.29                 | 0.007   | 0.171           | 0.47                  | 0.036   | 0.495           |
| chr18:6144775-6202105_R                                 | chr18:6144775-6202105_R   | lincRNA:chr18:6144775-6202105 reverse strand                                                                                                            | 0.29                 | 0.007   | 0.171           | 0.25                  | 0.033   | 0.489           |
| chr17:85418489-85427364_F                               | chr17:85418489-85427364_F | lincRNA:chr17:85418489-85427364 forward strand                                                                                                          | 0.50                 | 0.007   | 0.171           | 0.80                  | 0.029   | 0.477           |
| Fbxo30                                                  | NM_027968                 | ref Mus musculus F-box protein 30 (Fbxo30), transcript variant 1, mRNA [NM_027968]                                                                      | 0.48                 | 0.007   | 0.172           | 0.70                  | 0.037   | 0.498           |
| Wdr92                                                   | NM_178909                 | ref Mus musculus WD repeat domain 92 (Wdr92), mRNA [NM_178909]                                                                                          | 1.43                 | 0.007   | 0.172           | 1.40                  | 0.014   | 0.415           |
| Gng2                                                    | NM_010315                 | ref Mus musculus guanine nucleotide binding protein (G protein), gamma 2 (Gng2), transcript variant 1, mRNA [NM_010315]                                 | 0.36                 | 0.007   | 0.173           | 0.33                  | 0.018   | 0.435           |
| Akap13                                                  | NM_029332                 | ref Mus musculus A kinase (PRKA) anchor protein 13 (Akap13), mRNA [NM_029332]                                                                           | 0.27                 | 0.007   | 0.173           | 0.32                  | 0.028   | 0.474           |
| Golga3                                                  | ENSMUST00000112512        | ens golgi autoantigen, golgin subfamily a, 3 Gene [Source:MGI (curated);Acc:MGI:96958] [ENSMUST00000112512]                                             | 0.30                 | 0.007   | 0.173           | 0.25                  | 0.024   | 0.458           |
| Sox17                                                   | NM_011441                 | ref Mus musculus SRY-box containing gene 17 (Sox17), mRNA [NM_011441]                                                                                   | 0.56                 | 0.007   | 0.174           | 0.44                  | 0.044   | 0.513           |

| Online Supplemental Table IV: mG4H-STZ and Con-STZ Both |                           |                                                                                                                                 |                      |         |                 |                       |         |                 |
|---------------------------------------------------------|---------------------------|---------------------------------------------------------------------------------------------------------------------------------|----------------------|---------|-----------------|-----------------------|---------|-----------------|
| Gene Symbol                                             | RefSeq                    | Description                                                                                                                     | logFC<br>Con-<br>STZ | P-value | Adj.<br>P-value | logFC<br>mG4H-<br>STZ | P-value | Adj.<br>P-value |
| Nfkbia                                                  | NM_010907                 | ref Mus musculus nuclear factor of kappa light polypeptide gene enhancer in B-cells inhibitor, alpha (Nfkbia), mRNA [NM_010907] | 0.55                 | 0.007   | 0.176           | 0.72                  | 0.044   | 0.511           |
| Nr4a1                                                   | NM_010444                 | ref Mus musculus nuclear receptor subfamily 4, group A, member 1 (Nr4a1), mRNA [NM_010444]                                      | 0.83                 | 0.007   | 0.176           | 0.80                  | 0.030   | 0.478           |
| Krt39                                                   | NM_213730                 | ref Mus musculus keratin 39 (Krt39), mRNA [NM_213730]                                                                           | 0.63                 | 0.007   | 0.177           | 0.56                  | 0.011   | 0.406           |
| AA408251                                                | BG076663                  | gb H3004C07-5 NIA Mouse 15K cDNA Clone Set Mus musculus cDNA clone H3004C07 5', mRNA sequence [BG076663]                        | 0.52                 | 0.007   | 0.178           | 0.66                  | 0.022   | 0.450           |
| Gm2034                                                  | XM_001472204              | ref PREDICTED: Mus musculus similar to pol protein (LOC100039073), mRNA [XM_001472204]                                          | 1.51                 | 0.007   | 0.179           | 1.47                  | 0.015   | 0.419           |
| chr17:85422370-85423168_F                               | chr17:85422370-85423168_F | lincRNA:chr17:85422370-85423168 forward strand                                                                                  | 0.56                 | 0.007   | 0.179           | 0.81                  | 0.022   | 0.451           |
| Gm2016                                                  | NM_001122662              | ref Mus musculus predicted gene 2016 (Gm2016), mRNA [NM_001122662]                                                              | 0.67                 | 0.007   | 0.179           | 0.59                  | 0.020   | 0.442           |
| Filip1l                                                 | NM_001040397              | ref Mus musculus filamin A interacting protein 1-like (Filip1l), transcript variant 1, mRNA [NM_001040397]                      | 0.32                 | 0.007   | 0.179           | 0.24                  | 0.045   | 0.513           |
| Ccr1l                                                   | NM_145700                 | ref Mus musculus chemokine (C-C motif) receptor-like 1 (Ccr1l), mRNA [NM_145700]                                                | 0.64                 | 0.007   | 0.179           | 0.45                  | 0.026   | 0.471           |
| Retnlg                                                  | NM_181596                 | ref Mus musculus resistin like gamma (Retnlg), mRNA [NM_181596]                                                                 | 1.06                 | 0.007   | 0.179           | 1.23                  | 0.029   | 0.477           |
| Chrm1                                                   | NM_001112697              | ref Mus musculus cholinergic receptor, muscarinic 1, CNS (Chrm1), transcript variant 1, mRNA [NM_001112697]                     | 0.52                 | 0.007   | 0.181           | 0.50                  | 0.029   | 0.477           |
| Pdpk1                                                   | NM_011062                 | ref Mus musculus 3-phosphoinositide dependent protein kinase-1 (Pdpk1), transcript variant 1, mRNA [NM_011062]                  | 0.40                 | 0.007   | 0.182           | 0.36                  | 0.013   | 0.412           |
| Nptn                                                    | NM_009145                 | ref Mus musculus neuroplastin (Nptn), mRNA [NM_009145]                                                                          | 0.31                 | 0.007   | 0.182           | 0.30                  | 0.016   | 0.423           |
| chr15:77575125-77585575_F                               | chr15:77575125-77585575_F | lincRNA:chr15:77575125-77585575 forward strand                                                                                  | 0.58                 | 0.007   | 0.182           | 0.53                  | 0.023   | 0.456           |
| Alpk2                                                   | NM_001037294              | ref Mus musculus alpha-kinase 2 (Alpk2), mRNA [NM_001037294]                                                                    | 0.34                 | 0.007   | 0.182           | 0.31                  | 0.027   | 0.472           |

| Online Supplemental Table IV: mG4H-STZ and Con-STZ Both |                            |                                                                                                                                                       |                      |         |                 |                       |         |                 |
|---------------------------------------------------------|----------------------------|-------------------------------------------------------------------------------------------------------------------------------------------------------|----------------------|---------|-----------------|-----------------------|---------|-----------------|
| Gene Symbol                                             | RefSeq                     | Description                                                                                                                                           | logFC<br>Con-<br>STZ | P-value | Adj.<br>P-value | logFC<br>mG4H-<br>STZ | P-value | Adj.<br>P-value |
| Igf1r                                                   | NM_010513                  | ref Mus musculus insulin-like growth factor I receptor (Igf1r), mRNA [NM_010513]                                                                      | 0.73                 | 0.007   | 0.183           | 0.73                  | 0.009   | 0.397           |
| Foxp4                                                   | NM_001110824               | ref Mus musculus forkhead box P4 (Foxp4), transcript variant 1, mRNA [NM_001110824]                                                                   | 0.33                 | 0.008   | 0.183           | 0.47                  | 0.004   | 0.323           |
| Gm8288                                                  | XR_034140                  | ref PREDICTED: Mus musculus similar to high-mobility group box 1 (LOC666786), misc RNA [XR_034140]                                                    | 0.92                 | 0.008   | 0.184           | 1.12                  | 0.003   | 0.304           |
| Pam                                                     | NM_013626                  | ref Mus musculus peptidylglycine alpha-amidating monooxygenase (Pam), mRNA [NM_013626]                                                                | 0.51                 | 0.008   | 0.185           | 0.60                  | 0.004   | 0.335           |
| Mst1r                                                   | NM_009074                  | ref Mus musculus macrophage stimulating 1 receptor (c-met-related tyrosine kinase) (Mst1r), mRNA [NM_009074]                                          | 0.38                 | 0.008   | 0.187           | 0.27                  | 0.038   | 0.499           |
| Mgst1                                                   | NM_019946                  | ref Mus musculus microsomal glutathione S-transferase 1 (Mgst1), mRNA [NM_019946]                                                                     | 0.71                 | 0.008   | 0.189           | 0.75                  | 0.008   | 0.390           |
| Pip5k1a                                                 | AK167816                   | gb Mus musculus CRL-1722 L5178Y-R cDNA, RIKEN full-length enriched library, clone:l730030E20 product:unclassifiable, full insert sequence. [AK167816] | 1.70                 | 0.008   | 0.190           | 1.47                  | 0.044   | 0.512           |
| chr3:145313275-145315057_F                              | chr3:145313275-145315057_F | lincRNA:chr3:145313275-145315057 forward strand                                                                                                       | 0.60                 | 0.008   | 0.190           | 0.72                  | 0.011   | 0.407           |
| chr4:146507925-146532650_R                              | chr4:146507925-146532650_R | lincRNA:chr4:146507925-146532650 reverse strand                                                                                                       | 0.47                 | 0.008   | 0.190           | 0.45                  | 0.046   | 0.513           |
| Dennd5a                                                 | NM_021494                  | ref Mus musculus DENN/MADD domain containing 5A (Dennd5a), mRNA [NM_021494]                                                                           | 0.30                 | 0.008   | 0.191           | 0.37                  | 0.003   | 0.281           |
| Zwint                                                   | NM_025635                  | ref Mus musculus ZW10 interactor (Zwint), mRNA [NM_025635]                                                                                            | 0.48                 | 0.008   | 0.192           | 0.48                  | 0.045   | 0.513           |
| Aspg                                                    | NM_001081169               | ref Mus musculus asparaginase homolog (S. cerevisiae) (Aspg), mRNA [NM_001081169]                                                                     | 0.54                 | 0.008   | 0.192           | 0.58                  | 0.010   | 0.403           |
| 1600029D21Rik                                           | NM_029639                  | ref Mus musculus RIKEN cDNA 1600029D21 gene (1600029D21Rik), mRNA [NM_029639]                                                                         | 0.52                 | 0.008   | 0.192           | 0.45                  | 0.026   | 0.471           |
| chr13:3497296-3500441_F                                 | chr13:3497296-3500441_F    | lincRNA:chr13:3497296-3500441 forward strand                                                                                                          | 0.66                 | 0.008   | 0.192           | 0.54                  | 0.042   | 0.508           |
| Dusp1                                                   | NM_013642                  | ref Mus musculus dual specificity phosphatase 1 (Dusp1), mRNA [NM_013642]                                                                             | 0.39                 | 0.008   | 0.193           | 0.48                  | 0.027   | 0.473           |
| Grhl1                                                   | NM_145890                  | ref Mus musculus grainyhead-like 1 (Drosophila) (Grhl1), transcript variant 2, mRNA [NM_145890]                                                       | 0.61                 | 0.008   | 0.193           | 0.62                  | 0.050   | 0.520           |

Online Supplemental Table IV: mG4H-STZ and Con-STZ Both

| Gene Symbol                      | RefSeq                    | Description                                                                                                                                                                                               | logFC<br>Con-<br>STZ | P-value | Adj.<br>P-value | logFC<br>mG4H-<br>STZ | P-value | Adj.<br>P-value |
|----------------------------------|---------------------------|-----------------------------------------------------------------------------------------------------------------------------------------------------------------------------------------------------------|----------------------|---------|-----------------|-----------------------|---------|-----------------|
| <b>Herpud2</b>                   | NM_020586                 | ref Mus musculus HERPUD family member 2 (Herpud2), mRNA [NM_020586]                                                                                                                                       | 0.34                 | 0.008   | 0.193           | 0.41                  | 0.014   | 0.414           |
| <b>Mettl7b</b>                   | NM_027853                 | ref Mus musculus methyltransferase like 7B (Mettl7b), mRNA [NM_027853]                                                                                                                                    | 0.92                 | 0.008   | 0.193           | 1.07                  | 0.009   | 0.394           |
| <b>Usp46</b>                     | NM_177561                 | ref Mus musculus ubiquitin specific peptidase 46 (Usp46), mRNA [NM_177561]                                                                                                                                | 0.31                 | 0.008   | 0.194           | 0.45                  | 0.005   | 0.350           |
| <b>ENSMUST00000121210</b>        | ENSMUST00000121210        | ens coiled-coil-helix-coiled-coil-helix domain containing 7 Gene [Source:MGI (curated);Acc:MGI:1913683] [ENSMUST00000121210]                                                                              | 0.43                 | 0.008   | 0.194           | 0.58                  | 0.010   | 0.401           |
| <b>chr1:71984564-71985074_R</b>  | chr1:71984564-71985074_R  | lincRNA:chr1:71984564-71985074 reverse strand                                                                                                                                                             | 0.62                 | 0.009   | 0.195           | 0.76                  | 0.002   | 0.271           |
| <b>chr13:70745306-70837331_R</b> | chr13:70745306-70837331_R | lincRNA:chr13:70745306-70837331 reverse strand                                                                                                                                                            | 0.35                 | 0.009   | 0.195           | 0.45                  | 0.037   | 0.498           |
| <b>Nkd2</b>                      | NM_028186                 | ref Mus musculus naked cuticle 2 homolog (Drosophila) (Nkd2), mRNA [NM_028186]                                                                                                                            | 0.42                 | 0.009   | 0.198           | 0.26                  | 0.044   | 0.513           |
| <b>Hic2</b>                      | NM_178922                 | ref Mus musculus hypermethylated in cancer 2 (Hic2), mRNA [NM_178922]                                                                                                                                     | 0.47                 | 0.009   | 0.198           | 0.43                  | 0.037   | 0.498           |
| <b>chr17:15100982-15115630_R</b> | chr17:15100982-15115630_R | lincRNA:chr17:15100982-15115630 reverse strand                                                                                                                                                            | 0.41                 | 0.009   | 0.199           | 0.41                  | 0.030   | 0.477           |
| <b>C78339</b>                    | NM_001033192              | ref Mus musculus expressed sequence C78339 (C78339), mRNA [NM_001033192]                                                                                                                                  | 0.47                 | 0.009   | 0.199           | 0.57                  | 0.026   | 0.470           |
| <b>chr12:9117250-9128800_R</b>   | chr12:9117250-9128800_R   | lincRNA:chr12:9117250-9128800 reverse strand                                                                                                                                                              | 0.52                 | 0.009   | 0.200           | 0.73                  | 0.001   | 0.183           |
| <b>Gm10848</b>                   | AK034833                  | gb Mus musculus 12 days embryo embryonic body between diaphragm region and neck cDNA, RIKEN full-length enriched library, clone:9430045C13 product:hypothetical protein, full insert sequence. [AK034833] | 0.84                 | 0.009   | 0.200           | 0.77                  | 0.012   | 0.411           |
| <b>Gm608</b>                     | NM_001029889              | ref Mus musculus predicted gene 608 (Gm608), mRNA [NM_001029889]                                                                                                                                          | 0.45                 | 0.009   | 0.200           | 0.36                  | 0.032   | 0.486           |
| <b>Pou6f1</b>                    | NM_010127                 | ref Mus musculus POU domain, class 6, transcription factor 1 (Pou6f1), mRNA [NM_010127]                                                                                                                   | 0.28                 | 0.009   | 0.200           | 0.32                  | 0.046   | 0.513           |



| Online Supplemental Table IV: mG4H-STZ and Con-STZ Both |                           |                                                                                                                                        |                      |         |                 |                       |         |                 |
|---------------------------------------------------------|---------------------------|----------------------------------------------------------------------------------------------------------------------------------------|----------------------|---------|-----------------|-----------------------|---------|-----------------|
| Gene Symbol                                             | RefSeq                    | Description                                                                                                                            | logFC<br>Con-<br>STZ | P-value | Adj.<br>P-value | logFC<br>mG4H-<br>STZ | P-value | Adj.<br>P-value |
| <b>Mbd1</b>                                             | NM_013594                 | ref Mus musculus methyl-CpG binding domain protein 1 (Mbd1), mRNA [NM_013594]                                                          | 0.50                 | 0.009   | 0.201           | 0.43                  | 0.029   | 0.477           |
| <b>Ahnak</b>                                            | NM_001039959              | ref Mus musculus AHNAK nucleoprotein (desmoyokin) (Ahnak), transcript variant 3, mRNA [NM_001039959]                                   | 0.40                 | 0.009   | 0.201           | 0.53                  | 0.033   | 0.489           |
| <b>Xirp1</b>                                            | NM_011724                 | ref Mus musculus xin actin-binding repeat containing 1 (Xirp1), mRNA [NM_011724]                                                       | 0.59                 | 0.009   | 0.202           | 0.42                  | 0.027   | 0.472           |
| <b>Slc6a6</b>                                           | NM_009320                 | ref Mus musculus solute carrier family 6 (neurotransmitter transporter, taurine), member 6 (Slc6a6), mRNA [NM_009320]                  | 0.56                 | 0.009   | 0.203           | 0.76                  | 0.001   | 0.246           |
| <b>1700025G04Rik</b>                                    | NM_197990                 | ref Mus musculus RIKEN cDNA 1700025G04 gene (1700025G04Rik), mRNA [NM_197990]                                                          | 0.33                 | 0.009   | 0.203           | 0.44                  | 0.003   | 0.281           |
| <b>Rgs2</b>                                             | NM_009061                 | ref Mus musculus regulator of G-protein signaling 2 (Rgs2), mRNA [NM_009061]                                                           | 0.47                 | 0.009   | 0.204           | 0.52                  | 0.011   | 0.407           |
| <b>chr17:15100982-15115630_R</b>                        | chr17:15100982-15115630_R | lincRNA:chr17:15100982-15115630 reverse strand                                                                                         | 0.50                 | 0.009   | 0.204           | 0.53                  | 0.009   | 0.394           |
| <b>Slk</b>                                              | NM_009289                 | ref Mus musculus STE20-like kinase (yeast) (Slk), transcript variant 1, mRNA [NM_009289]                                               | 0.34                 | 0.010   | 0.207           | 0.38                  | 0.034   | 0.493           |
| <b>Mical2</b>                                           | NM_177282                 | ref Mus musculus microtubule associated monooxygenase, calponin and LIM domain containing 2 (Mical2), mRNA [NM_177282]                 | 0.40                 | 0.010   | 0.207           | 0.35                  | 0.038   | 0.499           |
| <b>Loxl4</b>                                            | NM_001164311              | ref Mus musculus lysyl oxidase-like 4 (Loxl4), transcript variant 1, mRNA [NM_001164311]                                               | 0.71                 | 0.010   | 0.208           | 0.58                  | 0.010   | 0.400           |
| <b>NEAT2</b>                                            | NEAT2                     | lincRNA:chr19:5795689-5802671 reverse strand                                                                                           | 0.51                 | 0.010   | 0.208           | 0.63                  | 0.032   | 0.485           |
| <b>Hhip1</b>                                            | NM_001044380              | ref Mus musculus hedgehog interacting protein-like 1 (Hhip1), mRNA [NM_001044380]                                                      | 0.40                 | 0.010   | 0.208           | 0.28                  | 0.042   | 0.507           |
| <b>Zcchc5</b>                                           | NM_199468                 | ref Mus musculus zinc finger, CCHC domain containing 5 (Zcchc5), mRNA [NM_199468]                                                      | 0.72                 | 0.010   | 0.208           | 0.54                  | 0.027   | 0.473           |
| <b>chr17:15132576-15147002_R</b>                        | chr17:15132576-15147002_R | lincRNA:chr17:15132576-15147002 reverse strand                                                                                         | 0.46                 | 0.010   | 0.209           | 0.60                  | 0.003   | 0.290           |
| <b>Gcnt4</b>                                            | NM_001166065              | ref Mus musculus glucosaminyl (N-acetyl) transferase 4, core 2 (beta-1,6-N-acetylglucosaminyltransferase) (Gcnt4), mRNA [NM_001166065] | 0.41                 | 0.010   | 0.210           | 0.38                  | 0.027   | 0.472           |

Online Supplemental Table IV: mG4H-STZ and Con-STZ Both

| Gene Symbol                | RefSeq                     | Description                                                                                                           | logFC<br>Con-<br>STZ | P-value | Adj.<br>P-value | logFC<br>mG4H-<br>STZ | P-value | Adj.<br>P-value |
|----------------------------|----------------------------|-----------------------------------------------------------------------------------------------------------------------|----------------------|---------|-----------------|-----------------------|---------|-----------------|
| chr6:28870220-28870692_R   | chr6:28870220-28870692_R   | lincRNA:chr6:28870220-28870692 reverse strand                                                                         | 0.78                 | 0.010   | 0.210           | 0.94                  | 0.005   | 0.353           |
| Foxp4                      | NM_001110824               | ref Mus musculus forkhead box P4 (Foxp4), transcript variant 1, mRNA [NM_001110824]                                   | 0.34                 | 0.010   | 0.210           | 0.35                  | 0.013   | 0.412           |
| chr19:23254618-23268776_R  | chr19:23254618-23268776_R  | lincRNA:chr19:23254618-23268776 reverse strand                                                                        | 0.50                 | 0.010   | 0.211           | 0.53                  | 0.035   | 0.495           |
| chrX:165758353-165806110_F | chrX:165758353-165806110_F | lincRNA:chrX:165758353-165806110 forward strand                                                                       | 0.33                 | 0.010   | 0.212           | 0.27                  | 0.033   | 0.489           |
| Get4                       | NM_026269                  | ref Mus musculus golgi to ER traffic protein 4 homolog (S. cerevisiae) (Get4), transcript variant 1, mRNA [NM_026269] | 0.46                 | 0.010   | 0.212           | 0.50                  | 0.041   | 0.504           |
| Slx1l                      | NM_029181                  | ref Mus musculus Slx-like 1 (Slx1l), mRNA [NM_029181]                                                                 | 0.52                 | 0.010   | 0.213           | 0.72                  | 0.018   | 0.435           |
| Sbds                       | NM_023248                  | ref Mus musculus Shwachman-Bodian-Diamond syndrome homolog (human) (Sbds), mRNA [NM_023248]                           | 0.39                 | 0.010   | 0.216           | 0.42                  | 0.034   | 0.491           |
| Pdpk1                      | NM_001080773               | ref Mus musculus 3-phosphoinositide dependent protein kinase-1 (Pdpk1), transcript variant 2, mRNA [NM_001080773]     | 0.36                 | 0.010   | 0.216           | 0.30                  | 0.026   | 0.469           |
| EII                        | NM_007924                  | ref Mus musculus elongation factor RNA polymerase II (EII), mRNA [NM_007924]                                          | 0.54                 | 0.011   | 0.216           | 0.52                  | 0.033   | 0.490           |
| Arl5a                      | NM_182994                  | ref Mus musculus ADP-ribosylation factor-like 5A (Arl5a), mRNA [NM_182994]                                            | 0.33                 | 0.011   | 0.217           | 0.31                  | 0.016   | 0.426           |
| Ear11                      | NM_053113                  | ref Mus musculus eosinophil-associated, ribonuclease A family, member 11 (Ear11), mRNA [NM_053113]                    | 0.55                 | 0.011   | 0.218           | 0.85                  | 0.038   | 0.499           |
| Tgfb2                      | NM_009367                  | ref Mus musculus transforming growth factor, beta 2 (Tgfb2), mRNA [NM_009367]                                         | 0.52                 | 0.011   | 0.220           | 0.35                  | 0.036   | 0.495           |
| Fas                        | NM_007987                  | ref Mus musculus Fas (TNF receptor superfamily member 6) (Fas), transcript variant 1, mRNA [NM_007987]                | 0.69                 | 0.011   | 0.222           | 0.69                  | 0.044   | 0.512           |
| NEAT2                      | NEAT2                      | lincRNA:chr19:5795689-5802671 reverse strand                                                                          | 0.53                 | 0.011   | 0.225           | 0.77                  | 0.034   | 0.491           |
| Brd2                       | NM_001025387               | ref Mus musculus bromodomain containing 2 (Brd2), transcript variant 2, mRNA [NM_001025387]                           | 0.27                 | 0.011   | 0.225           | 0.37                  | 0.029   | 0.477           |
| chr15:74474704-74474770_F  | chr15:74474704-74474770_F  | lincRNA:chr15:74474704-74474770 forward strand                                                                        | 1.16                 | 0.011   | 0.227           | 1.18                  | 0.018   | 0.436           |

Online Supplemental Table IV: mG4H-STZ and Con-STZ Both

| Gene Symbol                | RefSeq                     | Description                                                                                                       | logFC<br>Con-<br>STZ | P-value | Adj.<br>P-value | logFC<br>mG4H-<br>STZ | P-value | Adj.<br>P-value |
|----------------------------|----------------------------|-------------------------------------------------------------------------------------------------------------------|----------------------|---------|-----------------|-----------------------|---------|-----------------|
| Gm4499                     | XM_001479558               | ref PREDICTED: Mus musculus similar to pol protein (LOC100048118), mRNA [XM_001479558]                            | 1.50                 | 0.012   | 0.228           | 1.56                  | 0.015   | 0.419           |
| Hip1                       | NM_146001                  | ref Mus musculus huntingtin interacting protein 1 (Hip1), mRNA [NM_146001]                                        | 0.35                 | 0.012   | 0.228           | 0.28                  | 0.030   | 0.477           |
| Zkscan5                    | NM_016683                  | ref Mus musculus zinc finger with KRAB and SCAN domains 5 (Zkscan5), transcript variant 1, mRNA [NM_016683]       | 0.47                 | 0.012   | 0.230           | 0.48                  | 0.033   | 0.487           |
| chr5:106353430-106353843_F | chr5:106353430-106353843_F | lincRNA:chr5:106353430-106353843 forward strand                                                                   | 0.60                 | 0.012   | 0.231           | 0.47                  | 0.033   | 0.490           |
| Trib1                      | NM_144549                  | ref Mus musculus tribbles homolog 1 (Drosophila) (Trib1), mRNA [NM_144549]                                        | 0.35                 | 0.012   | 0.232           | 0.31                  | 0.045   | 0.513           |
| Gm12684                    | XR_031097                  | ref PREDICTED: Mus musculus similar to glyceraldehyde-3-phosphate dehydrogenase (LOC665212), misc RNA [XR_031097] | 0.49                 | 0.012   | 0.232           | 0.39                  | 0.042   | 0.508           |
| Sgcd                       | NM_011891                  | ref Mus musculus sarcoglycan, delta (dystrophin-associated glycoprotein) (Sgcd), mRNA [NM_011891]                 | 0.25                 | 0.012   | 0.234           | 0.39                  | 0.003   | 0.304           |
| Gas5                       | NR_002840                  | ref Mus musculus growth arrest specific 5 (Gas5), non-coding RNA [NR_002840]                                      | 0.36                 | 0.012   | 0.234           | 0.44                  | 0.036   | 0.495           |
| Tbx3                       | NM_011535                  | ref Mus musculus T-box 3 (Tbx3), transcript variant 1, mRNA [NM_011535]                                           | 0.40                 | 0.012   | 0.234           | 0.36                  | 0.028   | 0.476           |
| chr18:6144775-6202105_R    | chr18:6144775-6202105_R    | lincRNA:chr18:6144775-6202105 reverse strand                                                                      | 0.29                 | 0.012   | 0.234           | 0.32                  | 0.010   | 0.405           |
| Gm12164                    | XR_031806                  | ref PREDICTED: Mus musculus similar to ferritin light chain 2 (LOC633082), misc RNA [XR_031806]                   | 0.50                 | 0.012   | 0.234           | 0.35                  | 0.024   | 0.458           |
| Inadl                      | NM_001005784               | ref Mus musculus InaD-like (Drosophila) (Inadl), transcript variant 2, mRNA [NM_001005784]                        | 0.41                 | 0.012   | 0.235           | 0.52                  | 0.008   | 0.391           |
| Ptpfr                      | NM_011213                  | ref Mus musculus protein tyrosine phosphatase, receptor type, F (Ptpfr), mRNA [NM_011213]                         | 0.45                 | 0.012   | 0.237           | 0.35                  | 0.038   | 0.499           |
| Sp1                        | NM_013672                  | ref Mus musculus trans-acting transcription factor 1 (Sp1), mRNA [NM_013672]                                      | 0.25                 | 0.012   | 0.238           | 0.23                  | 0.038   | 0.499           |
| Stk38l                     | NM_172734                  | ref Mus musculus serine/threonine kinase 38 like (Stk38l), mRNA [NM_172734]                                       | 0.30                 | 0.013   | 0.239           | 0.35                  | 0.017   | 0.429           |

| Online Supplemental Table IV: mG4H-STZ and Con-STZ Both |                         |                                                                                                                                                                                    |                      |         |                 |                       |         |                 |
|---------------------------------------------------------|-------------------------|------------------------------------------------------------------------------------------------------------------------------------------------------------------------------------|----------------------|---------|-----------------|-----------------------|---------|-----------------|
| Gene Symbol                                             | RefSeq                  | Description                                                                                                                                                                        | logFC<br>Con-<br>STZ | P-value | Adj.<br>P-value | logFC<br>mG4H-<br>STZ | P-value | Adj.<br>P-value |
| <b>Tcp10c</b>                                           | NM_009341               | ref Mus musculus t-complex protein 10c (Tcp10c), mRNA [NM_009341]                                                                                                                  | 0.39                 | 0.013   | 0.240           | 0.48                  | 0.028   | 0.474           |
| <b>Spp1</b>                                             | NM_009263               | ref Mus musculus secreted phosphoprotein 1 (Spp1), mRNA [NM_009263]                                                                                                                | 1.12                 | 0.013   | 0.243           | 0.63                  | 0.046   | 0.513           |
| <b>Pacrg</b>                                            | NM_027032               | ref Mus musculus PARK2 co-regulated (Pacrg), mRNA [NM_027032]                                                                                                                      | 0.41                 | 0.013   | 0.243           | 0.51                  | 0.031   | 0.482           |
| <b>Efhd2</b>                                            | NM_025994               | ref Mus musculus EF hand domain containing 2 (Efhd2), mRNA [NM_025994]                                                                                                             | 0.58                 | 0.013   | 0.244           | 0.76                  | 0.012   | 0.410           |
| <b>Tmem132e</b>                                         | NM_023438               | ref Mus musculus transmembrane protein 132E (Tmem132e), mRNA [NM_023438]                                                                                                           | 0.44                 | 0.013   | 0.244           | 0.33                  | 0.011   | 0.406           |
| <b>AW551984</b>                                         | NM_178737               | ref Mus musculus expressed sequence AW551984 (AW551984), mRNA [NM_178737]                                                                                                          | 0.60                 | 0.013   | 0.246           | 0.44                  | 0.013   | 0.412           |
| <b>ENSMUST00000062980</b>                               | ENSMUST00000062980      | ens metallothionein 1 Gene [Source:MGI Symbol;Acc:MGI:97171] [ENSMUST00000062980]                                                                                                  | 0.80                 | 0.014   | 0.249           | 0.88                  | 0.029   | 0.477           |
| <b>Popdc3</b>                                           | NM_024286               | ref Mus musculus popeye domain containing 3 (Popdc3), mRNA [NM_024286]                                                                                                             | 0.37                 | 0.014   | 0.252           | 0.54                  | 0.028   | 0.476           |
| <b>chr18:6144775-6202232_R</b>                          | chr18:6144775-6202232_R | lincRNA:chr18:6144775-6202232 reverse strand                                                                                                                                       | 0.28                 | 0.014   | 0.254           | 0.30                  | 0.008   | 0.392           |
| <b>Gm3430</b>                                           | XM_001476688            | ref PREDICTED: Mus musculus similar to pol protein (LOC100041612), mRNA [XM_001476688]                                                                                             | 1.37                 | 0.014   | 0.254           | 1.46                  | 0.018   | 0.435           |
| <b>Slc25a20</b>                                         | NM_020520               | ref Mus musculus solute carrier family 25 (mitochondrial carnitine/acylcarnitine translocase), member 20 (Slc25a20), nuclear gene encoding mitochondrial protein, mRNA [NM_020520] | 0.61                 | 0.014   | 0.255           | 0.61                  | 0.014   | 0.412           |
| <b>chr18:6144775-6202105_R</b>                          | chr18:6144775-6202105_R | lincRNA:chr18:6144775-6202105 reverse strand                                                                                                                                       | 0.28                 | 0.014   | 0.256           | 0.36                  | 0.006   | 0.369           |
| <b>Fpr1</b>                                             | NM_013521               | ref Mus musculus formyl peptide receptor 1 (Fpr1), mRNA [NM_013521]                                                                                                                | 0.71                 | 0.014   | 0.256           | 0.58                  | 0.042   | 0.508           |
| <b>LOC434624</b>                                        | XM_486478               | ref PREDICTED: Mus musculus similar to ferritin light chain 2 (LOC434624), mRNA [XM_486478]                                                                                        | 0.46                 | 0.014   | 0.257           | 0.30                  | 0.025   | 0.464           |
| <b>Pygb</b>                                             | NM_153781               | ref Mus musculus brain glycogen phosphorylase (Pygb), mRNA [NM_153781]                                                                                                             | 0.31                 | 0.014   | 0.257           | 0.45                  | 0.032   | 0.486           |

Online Supplemental Table IV: mG4H-STZ and Con-STZ Both

| Gene Symbol                       | RefSeq                     | Description                                                                                                         | logFC<br>Con-<br>STZ | P-value | Adj.<br>P-value | logFC<br>mG4H-<br>STZ | P-value | Adj.<br>P-value |
|-----------------------------------|----------------------------|---------------------------------------------------------------------------------------------------------------------|----------------------|---------|-----------------|-----------------------|---------|-----------------|
| <b>Fbxo30</b>                     | NM_027968                  | ref Mus musculus F-box protein 30 (Fbxo30), transcript variant 1, mRNA [NM_027968]                                  | 0.39                 | 0.014   | 0.258           | 0.42                  | 0.024   | 0.459           |
| <b>Spry1</b>                      | NM_011896                  | ref Mus musculus sprouty homolog 1 (Drosophila) (Spry1), mRNA [NM_011896]                                           | 0.32                 | 0.015   | 0.259           | 0.42                  | 0.015   | 0.419           |
| <b>Tulp4</b>                      | NM_054040                  | ref Mus musculus tubby like protein 4 (Tulp4), transcript variant 1, mRNA [NM_054040]                               | 0.29                 | 0.015   | 0.260           | 0.33                  | 0.012   | 0.408           |
| <b>chr11:31647436-31647791_R</b>  | chr11:31647436-31647791_R  | lincRNA:chr11:31647436-31647791 reverse strand                                                                      | 0.68                 | 0.015   | 0.260           | 0.84                  | 0.002   | 0.266           |
| <b>chr3:30052149-30052393_R</b>   | chr3:30052149-30052393_R   | lincRNA:chr3:30052149-30052393 reverse strand                                                                       | 0.87                 | 0.015   | 0.260           | 0.80                  | 0.029   | 0.477           |
| <b>Ppm1a</b>                      | NM_008910                  | ref Mus musculus protein phosphatase 1A, magnesium dependent, alpha isoform (Ppm1a), mRNA [NM_008910]               | 0.28                 | 0.015   | 0.260           | 0.38                  | 0.015   | 0.418           |
| <b>chr6:31007184-31007725_R</b>   | chr6:31007184-31007725_R   | lincRNA:chr6:31007184-31007725 reverse strand                                                                       | 0.55                 | 0.015   | 0.260           | 1.19                  | 0.014   | 0.416           |
| <b>Neb</b>                        | NM_010889                  | ref Mus musculus nebulin (Neb), mRNA [NM_010889]                                                                    | 0.56                 | 0.015   | 0.260           | 1.00                  | 0.000   | 0.160           |
| <b>Stat3</b>                      | NM_213659                  | ref Mus musculus signal transducer and activator of transcription 3 (Stat3), transcript variant 1, mRNA [NM_213659] | 0.44                 | 0.015   | 0.260           | 0.36                  | 0.016   | 0.425           |
| <b>Hipk1</b>                      | NM_010432                  | ref Mus musculus homeodomain interacting protein kinase 1 (Hipk1), mRNA [NM_010432]                                 | 0.49                 | 0.015   | 0.260           | 0.72                  | 0.007   | 0.377           |
| <b>Dnttip2</b>                    | NM_153806                  | ref Mus musculus deoxynucleotidyltransferase, terminal, interacting protein 2 (Dnttip2), mRNA [NM_153806]           | 0.49                 | 0.015   | 0.261           | 0.55                  | 0.020   | 0.443           |
| <b>Mfap2</b>                      | NM_008546                  | ref Mus musculus microfibrillar-associated protein 2 (Mfap2), transcript variant 1, mRNA [NM_008546]                | 0.60                 | 0.015   | 0.261           | 0.37                  | 0.028   | 0.475           |
| <b>Dhx32</b>                      | NM_133941                  | ref Mus musculus DEAH (Asp-Glu-Ala-His) box polypeptide 32 (Dhx32), mRNA [NM_133941]                                | 0.33                 | 0.015   | 0.264           | 0.39                  | 0.003   | 0.281           |
| <b>Mib1</b>                       | NM_144860                  | ref Mus musculus mindbomb homolog 1 (Drosophila) (Mib1), mRNA [NM_144860]                                           | 0.39                 | 0.015   | 0.264           | 0.57                  | 0.004   | 0.325           |
| <b>A130040M12Rik</b>              | NR_002860                  | ref Mus musculus RIKEN cDNA A130040M12 gene (A130040M12Rik), non-coding RNA [NR_002860]                             | 1.50                 | 0.015   | 0.266           | 1.60                  | 0.021   | 0.448           |
| <b>chr6:149221500-149237350_R</b> | chr6:149221500-149237350_R | lincRNA:chr6:149221500-149237350 reverse strand                                                                     | 0.72                 | 0.016   | 0.268           | 0.69                  | 0.050   | 0.520           |

Online Supplemental Table IV: mG4H-STZ and Con-STZ Both

| Gene Symbol                      | RefSeq                    | Description                                                                                                                                                                   | logFC<br>Con-<br>STZ | P-value | Adj.<br>P-value | logFC<br>mG4H-<br>STZ | P-value | Adj.<br>P-value |
|----------------------------------|---------------------------|-------------------------------------------------------------------------------------------------------------------------------------------------------------------------------|----------------------|---------|-----------------|-----------------------|---------|-----------------|
| <b>Bcl2l1</b>                    | NM_009743                 | ref Mus musculus BCL2-like 1 (Bcl2l1), nuclear gene encoding mitochondrial protein, mRNA [NM_009743]                                                                          | 0.66                 | 0.016   | 0.268           | 0.82                  | 0.049   | 0.519           |
| <b>Nr1d2</b>                     | NM_011584                 | ref Mus musculus nuclear receptor subfamily 1, group D, member 2 (Nr1d2), mRNA [NM_011584]                                                                                    | 0.50                 | 0.016   | 0.269           | 0.66                  | 0.016   | 0.423           |
| <b>Irx3</b>                      | NM_008393                 | ref Mus musculus Iroquois related homeobox 3 (Drosophila) (Irx3), mRNA [NM_008393]                                                                                            | 0.32                 | 0.016   | 0.269           | 0.40                  | 0.006   | 0.366           |
| <b>Sertad1</b>                   | NM_018820                 | ref Mus musculus SERTA domain containing 1 (Sertad1), mRNA [NM_018820]                                                                                                        | 0.32                 | 0.016   | 0.270           | 0.30                  | 0.027   | 0.471           |
| <b>Irak1bp1</b>                  | NM_022986                 | ref Mus musculus interleukin-1 receptor-associated kinase 1 binding protein 1 (Irak1bp1), transcript variant 1, mRNA [NM_022986]                                              | 0.39                 | 0.016   | 0.270           | 0.48                  | 0.011   | 0.407           |
| <b>Slc20a1</b>                   | NM_015747                 | ref Mus musculus solute carrier family 20, member 1 (Slc20a1), transcript variant 1, mRNA [NM_015747]                                                                         | 0.31                 | 0.016   | 0.270           | 0.25                  | 0.028   | 0.474           |
| <b>Dstn</b>                      | NM_019771                 | ref Mus musculus destrin (Dstn), mRNA [NM_019771]                                                                                                                             | 0.33                 | 0.016   | 0.270           | 0.34                  | 0.015   | 0.418           |
| <b>Tgif1</b>                     | NM_001164075              | ref Mus musculus TGFB-induced factor homeobox 1 (Tgif1), transcript variant 1, mRNA [NM_001164075]                                                                            | 0.30                 | 0.016   | 0.271           | 0.30                  | 0.025   | 0.467           |
| <b>chr13:9185198-9185778_F</b>   | chr13:9185198-9185778_F   | lincRNA:chr13:9185198-9185778 forward strand                                                                                                                                  | 0.42                 | 0.016   | 0.271           | 0.43                  | 0.023   | 0.453           |
| <b>7120432I05Rik</b>             | AK148667                  | gb Mus musculus 2 days neonate sympathetic ganglion cDNA, RIKEN full-length enriched library, clone:7120432I05 product:hypothetical protein, full insert sequence. [AK148667] | 0.64                 | 0.016   | 0.272           | 0.60                  | 0.011   | 0.406           |
| <b>ENSMUST00000076791</b>        | ENSMUST00000076791        | ens RIKEN cDNA 4632433K11 gene Gene [Source:MGI Symbol;Acc:MGI:1924293] [ENSMUST00000076791]                                                                                  | 0.27                 | 0.016   | 0.273           | 0.42                  | 0.017   | 0.429           |
| <b>Krba1</b>                     | NM_133922                 | ref Mus musculus KRAB-A domain containing 1 (Krba1), mRNA [NM_133922]                                                                                                         | 0.24                 | 0.016   | 0.273           | 0.28                  | 0.011   | 0.406           |
| <b>Iscu</b>                      | NM_025526                 | ref Mus musculus IscU iron-sulfur cluster scaffold homolog (E. coli) (Iscu), nuclear gene encoding mitochondrial protein, mRNA [NM_025526]                                    | 0.29                 | 0.016   | 0.273           | 0.29                  | 0.035   | 0.495           |
| <b>chr17:10057283-10075014_F</b> | chr17:10057283-10075014_F | lincRNA:chr17:10057283-10075014 forward strand                                                                                                                                | 0.83                 | 0.017   | 0.274           | 0.87                  | 0.010   | 0.403           |



| Online Supplemental Table IV: mG4H-STZ and Con-STZ Both |                          |                                                                                                                                                                |                      |         |                 |                       |         |                 |
|---------------------------------------------------------|--------------------------|----------------------------------------------------------------------------------------------------------------------------------------------------------------|----------------------|---------|-----------------|-----------------------|---------|-----------------|
| Gene Symbol                                             | RefSeq                   | Description                                                                                                                                                    | logFC<br>Con-<br>STZ | P-value | Adj.<br>P-value | logFC<br>mG4H-<br>STZ | P-value | Adj.<br>P-value |
| <b>ENSMUST00000115233</b>                               | ENSMUST00000115233       | ens protein phosphatase 1, regulatory (inhibitor) subunit 2 Gene [Source:MGI (curated);Acc:MGI:1914099] [ENSMUST00000115233]                                   | 0.28                 | 0.017   | 0.274           | 0.40                  | 0.013   | 0.412           |
| <b>Gpr35</b>                                            | NM_022320                | ref Mus musculus G protein-coupled receptor 35 (Gpr35), transcript variant 1, mRNA [NM_022320]                                                                 | 0.73                 | 0.017   | 0.274           | 0.83                  | 0.005   | 0.339           |
| <b>Ccdc152</b>                                          | NM_001166063             | ref Mus musculus coiled-coil domain containing 152 (Ccdc152), mRNA [NM_001166063]                                                                              | 0.65                 | 0.017   | 0.275           | 0.68                  | 0.030   | 0.480           |
| <b>Ankrd10</b>                                          | NM_133971                | ref Mus musculus ankyrin repeat domain 10 (Ankrd10), transcript variant 1, mRNA [NM_133971]                                                                    | 0.24                 | 0.017   | 0.276           | 0.38                  | 0.019   | 0.437           |
| <b>Ttc12</b>                                            | NM_172770                | ref Mus musculus tetratricopeptide repeat domain 12 (Ttc12), mRNA [NM_172770]                                                                                  | 0.28                 | 0.017   | 0.276           | 0.29                  | 0.048   | 0.518           |
| <b>chrX:34354757-34357195_R</b>                         | chrX:34354757-34357195_R | lincRNA:chrX:34354757-34357195 reverse strand                                                                                                                  | 0.30                 | 0.017   | 0.278           | 0.40                  | 0.010   | 0.406           |
| <b>Cry2</b>                                             | NM_009963                | ref Mus musculus cryptochrome 2 (photolyase-like) (Cry2), transcript variant 1, mRNA [NM_009963]                                                               | 0.30                 | 0.017   | 0.278           | 0.45                  | 0.031   | 0.483           |
| <b>Insr</b>                                             | NM_010568                | ref Mus musculus insulin receptor (Insr), mRNA [NM_010568]                                                                                                     | 0.31                 | 0.017   | 0.279           | 0.57                  | 0.003   | 0.290           |
| <b>Slc48a1</b>                                          | NM_026353                | ref Mus musculus solute carrier family 48 (heme transporter), member 1 (Slc48a1), mRNA [NM_026353]                                                             | 0.24                 | 0.017   | 0.279           | 0.35                  | 0.018   | 0.436           |
| <b>Odf3</b>                                             | ENSMUST00000106049       | ens outer dense fiber of sperm tails 3 Gene [Source:MGI (curated);Acc:MGI:1916537] [ENSMUST00000106049]                                                        | 0.46                 | 0.017   | 0.279           | 0.59                  | 0.006   | 0.356           |
| <b>9530020I12Rik</b>                                    | AK020565                 | gb Mus musculus adult male urinary bladder cDNA, RIKEN full-length enriched library, clone:9530020I12 product:unclassifiable, full insert sequence. [AK020565] | 0.50                 | 0.017   | 0.280           | 0.50                  | 0.019   | 0.441           |
| <b>Igsf11</b>                                           | NM_170599                | ref Mus musculus immunoglobulin superfamily, member 11 (Igsf11), mRNA [NM_170599]                                                                              | 0.28                 | 0.017   | 0.280           | 0.51                  | 0.011   | 0.407           |
| <b>Gm1153</b>                                           | XM_356464                | ref PREDICTED: Mus musculus gene model 1153, (NCBI) (Gm1153), mRNA [XM_356464]                                                                                 | 0.50                 | 0.018   | 0.280           | 0.51                  | 0.024   | 0.463           |
| <b>Zeb2</b>                                             | NM_015753                | ref Mus musculus zinc finger E-box binding homeobox 2 (Zeb2), transcript variant 2, mRNA [NM_015753]                                                           | 0.27                 | 0.018   | 0.281           | 0.26                  | 0.018   | 0.437           |
| <b>chr10:5950116-5958250_R</b>                          | chr10:5950116-5958250_R  | lincRNA:chr10:5950116-5958250 reverse strand                                                                                                                   | 0.42                 | 0.018   | 0.281           | 0.40                  | 0.039   | 0.501           |

Online Supplemental Table IV: mG4H-STZ and Con-STZ Both

| Gene Symbol                       | RefSeq                     | Description                                                                                                                                                 | logFC<br>Con-<br>STZ | P-value | Adj.<br>P-value | logFC<br>mG4H-<br>STZ | P-value | Adj.<br>P-value |
|-----------------------------------|----------------------------|-------------------------------------------------------------------------------------------------------------------------------------------------------------|----------------------|---------|-----------------|-----------------------|---------|-----------------|
| <b>Tmem200b</b>                   | ENSMUST00000094666         | ref  PREDICTED: Mus musculus predicted gene, EG623230 (EG623230), mRNA [XM_001475812]                                                                       | 0.25                 | 0.018   | 0.281           | 0.26                  | 0.050   | 0.520           |
| <b>chr7:134620707-134626739_F</b> | chr7:134620707-134626739_F | lincRNA:chr7:134620707-134626739 forward strand                                                                                                             | 0.47                 | 0.018   | 0.281           | 0.40                  | 0.022   | 0.452           |
| <b>9330162B11Rik</b>              | XM_001476061               | ref  PREDICTED: Mus musculus RIKEN cDNA 9330162B11 gene (9330162B11Rik), mRNA [XM_001476061]                                                                | 0.76                 | 0.018   | 0.282           | 0.77                  | 0.019   | 0.437           |
| <b>Nrl</b>                        | NM_001136074               | ref  Mus musculus neural retina leucine zipper gene (Nrl), transcript variant 2, mRNA [NM_001136074]                                                        | 0.77                 | 0.018   | 0.283           | 0.63                  | 0.029   | 0.477           |
| <b>ENSMUST00000071866</b>         | ENSMUST00000071866         | ref  PREDICTED: Mus musculus predicted gene, EG433251 (EG433251), mRNA [XM_484811]                                                                          | 0.23                 | 0.018   | 0.283           | 0.30                  | 0.030   | 0.478           |
| <b>Acacb</b>                      | NM_133904                  | ref  Mus musculus acetyl-Coenzyme A carboxylase beta (Acacb), mRNA [NM_133904]                                                                              | 0.27                 | 0.018   | 0.284           | 0.44                  | 0.018   | 0.437           |
| <b>Lass2</b>                      | NM_029789                  | ref  Mus musculus LAG1 homolog, ceramide synthase 2 (Lass2), mRNA [NM_029789]                                                                               | 0.22                 | 0.018   | 0.285           | 0.21                  | 0.039   | 0.501           |
| <b>Plagl1</b>                     | NM_009538                  | ref  Mus musculus pleiomorphic adenoma gene-like 1 (Plagl1), mRNA [NM_009538]                                                                               | 0.27                 | 0.018   | 0.286           | 0.40                  | 0.012   | 0.407           |
| <b>Gm4382</b>                     | XM_001480011               | ref  PREDICTED: Mus musculus similar to pol protein (LOC100043353), mRNA [XM_001480011]                                                                     | 1.47                 | 0.018   | 0.286           | 1.55                  | 0.015   | 0.419           |
| <b>Csnk1a1</b>                    | NM_146087                  | ref  Mus musculus casein kinase 1, alpha 1 (Csnk1a1), mRNA [NM_146087]                                                                                      | 0.23                 | 0.018   | 0.286           | 0.26                  | 0.033   | 0.490           |
| <b>Mctp1</b>                      | NM_030174                  | ref  Mus musculus multiple C2 domains, transmembrane 1 (Mctp1), mRNA [NM_030174]                                                                            | 0.77                 | 0.018   | 0.286           | 0.83                  | 0.046   | 0.514           |
| <b>A330044H09</b>                 | AK039451                   | gb  Mus musculus adult male spinal cord cDNA, RIKEN full-length enriched library, clone:A330044H09 product:unclassifiable, full insert sequence. [AK039451] | 0.27                 | 0.018   | 0.287           | 0.24                  | 0.033   | 0.490           |
| <b>LOC676884</b>                  | XR_032012                  | ref  PREDICTED: Mus musculus hypothetical LOC676884 (LOC676884), misc RNA [XR_032012]                                                                       | 0.39                 | 0.019   | 0.288           | 0.31                  | 0.013   | 0.412           |
| <b>Rabgap1l</b>                   | NM_001038621               | ref  Mus musculus RAB GTPase activating protein 1-like (Rabgap1l), transcript variant 2, mRNA [NM_001038621]                                                | 0.38                 | 0.019   | 0.288           | 0.58                  | 0.044   | 0.512           |
| <b>ENSMUST00000111548</b>         | ENSMUST00000111548         | ens  RIKEN cDNA 4833442J19 gene Gene [Source:MGI Symbol;Acc:MGI:2443575] [ENSMUST00000111548]                                                               | 0.62                 | 0.019   | 0.289           | 0.79                  | 0.017   | 0.433           |

Online Supplemental Table IV: mG4H-STZ and Con-STZ Both

| Gene Symbol                       | RefSeq                     | Description                                                                                                             | logFC<br>Con-<br>STZ | P-value | Adj.<br>P-value | logFC<br>mG4H-<br>STZ | P-value | Adj.<br>P-value |
|-----------------------------------|----------------------------|-------------------------------------------------------------------------------------------------------------------------|----------------------|---------|-----------------|-----------------------|---------|-----------------|
| <b>BC030336</b>                   | NM_001164580               | ref[Mus musculus cDNA sequence BC030336 (BC030336), mRNA [NM_001164580]                                                 | 0.29                 | 0.019   | 0.289           | 0.32                  | 0.045   | 0.513           |
| <b>ENSMUST00000115107</b>         | ENSMUST00000115107         | ens[Brain cDNA, clone MNCb-1768cDNA sequence AB041803 ; [Source:UniProtKB/TrEMBL;Acc:Q8K5E3] [ENSMUST00000115107]       | 0.39                 | 0.019   | 0.290           | 0.40                  | 0.018   | 0.435           |
| <b>Cacnb4</b>                     | NM_001037099               | ref[Mus musculus calcium channel, voltage-dependent, beta 4 subunit (Cacnb4), transcript variant 1, mRNA [NM_001037099] | 0.37                 | 0.019   | 0.290           | 0.34                  | 0.048   | 0.517           |
| <b>Rgs1</b>                       | NM_015811                  | ref[Mus musculus regulator of G-protein signaling 1 (Rgs1), mRNA [NM_015811]                                            | 0.81                 | 0.019   | 0.291           | 0.74                  | 0.048   | 0.518           |
| <b>Olfr466</b>                    | NM_146819                  | ref[Mus musculus olfactory receptor 466 (Olfr466), mRNA [NM_146819]                                                     | 0.42                 | 0.019   | 0.293           | 0.59                  | 0.019   | 0.441           |
| <b>chr9:118060025-118085050_R</b> | chr9:118060025-118085050_R | lincRNA:chr9:118060025-118085050 reverse strand                                                                         | 0.58                 | 0.019   | 0.293           | 0.64                  | 0.012   | 0.410           |
| <b>Rnft1</b>                      | NM_029788                  | ref[Mus musculus ring finger protein, transmembrane 1 (Rnft1), mRNA [NM_029788]                                         | 0.26                 | 0.019   | 0.293           | 0.27                  | 0.012   | 0.412           |
| <b>ENSMUST00000038090</b>         | ENSMUST00000038090         | ens[tubulin tyrosine ligase-like family, member 7 Gene [Source:MGI (curated);Acc:MGI:1918142] [ENSMUST00000038090]      | 0.42                 | 0.019   | 0.294           | 0.59                  | 0.006   | 0.356           |
| <b>chr8:41730287-41746862_R</b>   | chr8:41730287-41746862_R   | lincRNA:chr8:41730287-41746862 reverse strand                                                                           | 0.85                 | 0.019   | 0.294           | 0.78                  | 0.039   | 0.501           |
| <b>Myh3</b>                       | NM_001099635               | ref[Mus musculus myosin, heavy polypeptide 3, skeletal muscle, embryonic (Myh3), mRNA [NM_001099635]                    | 0.47                 | 0.020   | 0.295           | 0.34                  | 0.036   | 0.495           |
| <b>Sfrs16</b>                     | NM_016680                  | ref[Mus musculus splicing factor, arginine/serine-rich 16 (Sfrs16), transcript variant L, mRNA [NM_016680]              | 0.25                 | 0.020   | 0.296           | 0.36                  | 0.016   | 0.425           |
| <b>chr19:27448093-27462793_R</b>  | chr19:27448093-27462793_R  | lincRNA:chr19:27448093-27462793 reverse strand                                                                          | 0.40                 | 0.020   | 0.297           | 0.41                  | 0.027   | 0.472           |
| <b>Tmem11</b>                     | NM_173453                  | ref[Mus musculus transmembrane protein 11 (Tmem11), transcript variant 1, mRNA [NM_173453]                              | 0.21                 | 0.020   | 0.297           | 0.26                  | 0.033   | 0.490           |
| <b>chr6:86477309-86537554_R</b>   | chr6:86477309-86537554_R   | lincRNA:chr6:86477309-86537554 reverse strand                                                                           | 0.49                 | 0.020   | 0.298           | 0.47                  | 0.029   | 0.477           |

Online Supplemental Table IV: mG4H-STZ and Con-STZ Both

| Gene Symbol                      | RefSeq                    | Description                                                                                                                                           | logFC<br>Con-<br>STZ | P-value | Adj.<br>P-value | logFC<br>mG4H-<br>STZ | P-value | Adj.<br>P-value |
|----------------------------------|---------------------------|-------------------------------------------------------------------------------------------------------------------------------------------------------|----------------------|---------|-----------------|-----------------------|---------|-----------------|
| <b>Malat1</b>                    | NR_002847                 | ref Mus musculus metastasis associated lung adenocarcinoma transcript 1 (non-coding RNA) (Malat1), non-coding RNA [NR_002847]                         | 0.49                 | 0.021   | 0.302           | 0.78                  | 0.034   | 0.493           |
| <b>Pi4kb</b>                     | NM_175356                 | ref Mus musculus phosphatidylinositol 4-kinase, catalytic, beta polypeptide (Pi4kb), mRNA [NM_175356]                                                 | 0.26                 | 0.021   | 0.303           | 0.30                  | 0.029   | 0.477           |
| <b>chr18:6144775-6202105_R</b>   | chr18:6144775-6202105_R   | lincRNA:chr18:6144775-6202105 reverse strand                                                                                                          | 0.42                 | 0.021   | 0.304           | 0.41                  | 0.025   | 0.463           |
| <b>Ttr</b>                       | NM_013697                 | ref Mus musculus transthyretin (Ttr), mRNA [NM_013697]                                                                                                | 0.64                 | 0.021   | 0.304           | 0.82                  | 0.026   | 0.470           |
| <b>chr1:4898552-4899347_R</b>    | chr1:4898552-4899347_R    | lincRNA:chr1:4898552-4899347 reverse strand                                                                                                           | 0.48                 | 0.021   | 0.304           | 0.50                  | 0.024   | 0.459           |
| <b>Zbtb38</b>                    | ENSMUST00000152594        | ens zinc finger and BTB domain containing 38 Gene [Source:MGI (curated);Acc:MGI:2442866] [ENSMUST00000152594]                                         | 0.48                 | 0.021   | 0.305           | 0.44                  | 0.048   | 0.518           |
| <b>Fam46b</b>                    | NM_175307                 | ref Mus musculus family with sequence similarity 46, member B (Fam46b), mRNA [NM_175307]                                                              | 1.59                 | 0.021   | 0.306           | 1.52                  | 0.020   | 0.447           |
| <b>Loxl4</b>                     | NM_001164311              | ref Mus musculus lysyl oxidase-like 4 (Loxl4), transcript variant 1, mRNA [NM_001164311]                                                              | 0.51                 | 0.021   | 0.307           | 0.52                  | 0.014   | 0.412           |
| <b>4930511J24Rik</b>             | AK015759                  | gb Mus musculus adult male testis cDNA, RIKEN full-length enriched library, clone:4930511J24 product:unclassifiable, full insert sequence. [AK015759] | 0.28                 | 0.022   | 0.310           | 0.42                  | 0.012   | 0.408           |
| <b>chr15:41486232-41499767_R</b> | chr15:41486232-41499767_R | lincRNA:chr15:41486232-41499767 reverse strand                                                                                                        | 0.60                 | 0.022   | 0.310           | 0.74                  | 0.008   | 0.391           |
| <b>Gm2045</b>                    | XM_001472254              | ref PREDICTED: Mus musculus similar to pol protein (LOC100039096), mRNA [XM_001472254]                                                                | 0.94                 | 0.022   | 0.310           | 1.02                  | 0.040   | 0.504           |
| <b>chr11:68200716-68214458_R</b> | chr11:68200716-68214458_R | lincRNA:chr11:68200716-68214458 reverse strand                                                                                                        | 0.34                 | 0.022   | 0.310           | 0.46                  | 0.033   | 0.487           |
| <b>Ctdp1</b>                     | NM_026295                 | ref Mus musculus CTD (carboxy-terminal domain, RNA polymerase II, polypeptide A) phosphatase, subunit 1 (Ctdp1), mRNA [NM_026295]                     | 0.28                 | 0.022   | 0.310           | 0.39                  | 0.039   | 0.499           |
| <b>Mios</b>                      | NM_145374                 | ref Mus musculus missing oocyte, meiosis regulator, homolog (Drosophila) (Mios), mRNA [NM_145374]                                                     | 0.29                 | 0.022   | 0.310           | 0.31                  | 0.047   | 0.516           |

| Online Supplemental Table IV: mG4H-STZ and Con-STZ Both |                           |                                                                                                                                                             |                      |         |                 |                       |         |                 |
|---------------------------------------------------------|---------------------------|-------------------------------------------------------------------------------------------------------------------------------------------------------------|----------------------|---------|-----------------|-----------------------|---------|-----------------|
| Gene Symbol                                             | RefSeq                    | Description                                                                                                                                                 | logFC<br>Con-<br>STZ | P-value | Adj.<br>P-value | logFC<br>mG4H-<br>STZ | P-value | Adj.<br>P-value |
| chr3:83120454-83152078_F                                | chr3:83120454-83152078_F  | lincRNA:chr3:83120454-83152078 forward strand                                                                                                               | 0.41                 | 0.022   | 0.310           | 0.30                  | 0.014   | 0.414           |
| Peg3                                                    | NM_008817                 | ref[Mus musculus paternally expressed 3 (Peg3), mRNA [NM_008817]                                                                                            | 0.53                 | 0.022   | 0.313           | 0.55                  | 0.038   | 0.499           |
| Papd7                                                   | NM_198600                 | ref[Mus musculus PAP associated domain containing 7 (Papd7), transcript variant 1, mRNA [NM_198600]                                                         | 0.21                 | 0.022   | 0.313           | 0.33                  | 0.028   | 0.474           |
| Gm8743                                                  | XM_984659                 | ref[PREDICTED: Mus musculus predicted gene, EG667649 (EG667649), mRNA [XM_984659]                                                                           | 0.62                 | 0.022   | 0.315           | 0.59                  | 0.011   | 0.407           |
| E4f1                                                    | NM_007893                 | ref[Mus musculus E4F transcription factor 1 (E4f1), mRNA [NM_007893]                                                                                        | 0.24                 | 0.022   | 0.315           | 0.38                  | 0.018   | 0.435           |
| Lin7c                                                   | NM_011699                 | ref[Mus musculus lin-7 homolog C (C. elegans) (Lin7c), mRNA [NM_011699]                                                                                     | 0.33                 | 0.022   | 0.315           | 0.51                  | 0.029   | 0.477           |
| Ccl11                                                   | NM_011330                 | ref[Mus musculus chemokine (C-C motif) ligand 11 (Ccl11), mRNA [NM_011330]                                                                                  | 0.67                 | 0.023   | 0.316           | 0.56                  | 0.045   | 0.513           |
| Nedd4l                                                  | NM_031881                 | ref[Mus musculus neural precursor cell expressed, developmentally down-regulated gene 4-like (Nedd4l), transcript variant 2, mRNA [NM_031881]               | 0.23                 | 0.023   | 0.316           | 0.29                  | 0.013   | 0.412           |
| Ptpn23                                                  | NM_001081043              | ref[Mus musculus protein tyrosine phosphatase, non-receptor type 23 (Ptpn23), mRNA [NM_001081043]                                                           | 0.21                 | 0.023   | 0.317           | 0.23                  | 0.037   | 0.497           |
| Gnal                                                    | NM_177137                 | ref[Mus musculus guanine nucleotide binding protein, alpha stimulating, olfactory type (Gnal), transcript variant 2, mRNA [NM_177137]                       | 0.44                 | 0.023   | 0.317           | 0.84                  | 0.017   | 0.429           |
| Sema3g                                                  | ENSMUST00000090180        | ens[sema domain, immunoglobulin domain (Ig), short basic domain, secreted, (semaphorin) 3G Gene [Source:MGI (curated);Acc:MGI:3041242] [ENSMUST00000090180] | 0.83                 | 0.023   | 0.317           | 0.84                  | 0.011   | 0.406           |
| Mtus1                                                   | NM_001005863              | ref[Mus musculus mitochondrial tumor suppressor 1 (Mtus1), nuclear gene encoding mitochondrial protein, transcript variant 1, mRNA [NM_001005863]           | 0.28                 | 0.023   | 0.317           | 0.31                  | 0.019   | 0.437           |
| chr13:94182877-94203935_R                               | chr13:94182877-94203935_R | lincRNA:chr13:94182877-94203935 reverse strand                                                                                                              | 0.40                 | 0.023   | 0.318           | 0.54                  | 0.017   | 0.433           |
| Dsg2                                                    | NM_007883                 | ref[Mus musculus desmoglein 2 (Dsg2), mRNA [NM_007883]                                                                                                      | 0.35                 | 0.023   | 0.319           | 0.60                  | 0.007   | 0.382           |

Online Supplemental Table IV: mG4H-STZ and Con-STZ Both

| Gene Symbol                      | RefSeq                    | Description                                                                                                 | logFC<br>Con-<br>STZ | P-value | Adj.<br>P-value | logFC<br>mG4H-<br>STZ | P-value | Adj.<br>P-value |
|----------------------------------|---------------------------|-------------------------------------------------------------------------------------------------------------|----------------------|---------|-----------------|-----------------------|---------|-----------------|
| <b>Foxq1</b>                     | NM_008239                 | ref Mus musculus forkhead box Q1 (Foxq1), mRNA [NM_008239]                                                  | 0.36                 | 0.023   | 0.319           | 0.66                  | 0.011   | 0.406           |
| <b>Gm12824</b>                   | NM_001085549              | ref Mus musculus predicted gene 12824 (Gm12824), mRNA [NM_001085549]                                        | 0.41                 | 0.023   | 0.319           | 0.54                  | 0.038   | 0.499           |
| <b>Sms</b>                       | NM_009214                 | ref Mus musculus spermine synthase (Sms), mRNA [NM_009214]                                                  | 0.28                 | 0.023   | 0.320           | 0.36                  | 0.027   | 0.472           |
| <b>chr1:81657350-81765250_F</b>  | chr1:81657350-81765250_F  | lincRNA:chr1:81657350-81765250 forward strand                                                               | 0.37                 | 0.023   | 0.320           | 0.48                  | 0.013   | 0.412           |
| <b>chr19:21653968-21671718_F</b> | chr19:21653968-21671718_F | lincRNA:chr19:21653968-21671718 forward strand                                                              | 0.84                 | 0.023   | 0.321           | 0.77                  | 0.036   | 0.496           |
| <b>Camk2n1</b>                   | NM_025451                 | ref Mus musculus calcium/calmodulin-dependent protein kinase II inhibitor 1 (Camk2n1), mRNA [NM_025451]     | 0.41                 | 0.024   | 0.322           | 0.46                  | 0.030   | 0.477           |
| <b>chr18:77291264-77299664_F</b> | chr18:77291264-77299664_F | lincRNA:chr18:77291264-77299664 forward strand                                                              | 0.70                 | 0.024   | 0.325           | 0.64                  | 0.036   | 0.495           |
| <b>Zzz3</b>                      | NM_001080755              | ref Mus musculus zinc finger, ZZ domain containing 3 (Zzz3), transcript variant 2, mRNA [NM_001080755]      | 0.23                 | 0.024   | 0.325           | 0.28                  | 0.033   | 0.490           |
| <b>Synpo</b>                     | NM_177340                 | ref Mus musculus synaptopodin (Synpo), transcript variant A, mRNA [NM_177340]                               | 0.46                 | 0.024   | 0.325           | 0.37                  | 0.019   | 0.437           |
| <b>Socs6</b>                     | NM_018821                 | ref Mus musculus suppressor of cytokine signaling 6 (Socs6), mRNA [NM_018821]                               | 0.33                 | 0.024   | 0.325           | 0.45                  | 0.039   | 0.499           |
| <b>B430105G09Rik</b>             | XM_900601                 | ref PREDICTED: Mus musculus RIKEN cDNA B430105G09 gene (B430105G09Rik), mRNA [XM_900601]                    | 0.40                 | 0.024   | 0.326           | 0.44                  | 0.037   | 0.497           |
| <b>chrX:11688787-11689145_R</b>  | chrX:11688787-11689145_R  | lincRNA:chrX:11688787-11689145 reverse strand                                                               | 0.89                 | 0.024   | 0.327           | 0.88                  | 0.049   | 0.519           |
| <b>Mttp</b>                      | NM_001163457              | ref Mus musculus microsomal triglyceride transfer protein (Mttp), transcript variant 1, mRNA [NM_001163457] | 0.44                 | 0.024   | 0.327           | 0.51                  | 0.008   | 0.391           |
| <b>Pla2g16</b>                   | NM_139269                 | ref Mus musculus phospholipase A2, group XVI (Pla2g16), mRNA [NM_139269]                                    | 0.22                 | 0.024   | 0.328           | 0.37                  | 0.005   | 0.342           |



Online Supplemental Table IV: mG4H-STZ and Con-STZ Both

| Gene Symbol               | RefSeq                    | Description                                                                                                         | logFC<br>Con-<br>STZ | P-value | Adj.<br>P-value | logFC<br>mG4H-<br>STZ | P-value | Adj.<br>P-value |
|---------------------------|---------------------------|---------------------------------------------------------------------------------------------------------------------|----------------------|---------|-----------------|-----------------------|---------|-----------------|
| Irs2                      | NM_001081212              | ref Mus musculus insulin receptor substrate 2 (Irs2), mRNA [NM_001081212]                                           | 0.99                 | 0.024   | 0.328           | 0.87                  | 0.038   | 0.499           |
| Gm3428                    | NR_030730                 | ref Mus musculus predicted gene 3428 (Gm3428), non-coding RNA [NR_030730]                                           | 0.55                 | 0.025   | 0.331           | 0.61                  | 0.013   | 0.412           |
| Acacb                     | NM_133904                 | ref Mus musculus acetyl-Coenzyme A carboxylase beta (Acacb), mRNA [NM_133904]                                       | 0.24                 | 0.025   | 0.331           | 0.35                  | 0.008   | 0.393           |
| Ear10                     | NM_053112                 | ref Mus musculus eosinophil-associated, ribonuclease A family, member 10 (Ear10), mRNA [NM_053112]                  | 0.47                 | 0.025   | 0.331           | 0.92                  | 0.010   | 0.402           |
| Ypel3                     | NM_026875                 | ref Mus musculus yippee-like 3 (Drosophila) (Ypel3), mRNA [NM_026875]                                               | 0.52                 | 0.025   | 0.332           | 0.67                  | 0.004   | 0.326           |
| Klk5                      | NM_026806                 | ref Mus musculus kallikrein related-peptidase 5 (Klk5), mRNA [NM_026806]                                            | 0.66                 | 0.025   | 0.332           | 0.82                  | 0.006   | 0.366           |
| Polr3e                    | NM_025298                 | ref Mus musculus polymerase (RNA) III (DNA directed) polypeptide E (Polr3e), transcript variant 1, mRNA [NM_025298] | 0.25                 | 0.025   | 0.332           | 0.31                  | 0.017   | 0.434           |
| Ip6k1                     | NM_013785                 | ref Mus musculus inositol hexaphosphate kinase 1 (Ip6k1), mRNA [NM_013785]                                          | 0.25                 | 0.025   | 0.332           | 0.32                  | 0.041   | 0.506           |
| chr17:17315025-17460175_R | chr17:17315025-17460175_R | lincRNA:chr17:17315025-17460175 reverse strand                                                                      | 0.41                 | 0.026   | 0.337           | 0.50                  | 0.034   | 0.493           |
| Sec63                     | NM_153055                 | ref Mus musculus SEC63-like (S. cerevisiae) (Sec63), mRNA [NM_153055]                                               | 0.27                 | 0.026   | 0.339           | 0.34                  | 0.045   | 0.513           |
| Vwf                       | NM_011708                 | ref Mus musculus Von Willebrand factor homolog (Vwf), mRNA [NM_011708]                                              | 0.32                 | 0.026   | 0.341           | 0.35                  | 0.037   | 0.497           |
| Kalrn                     | NM_177357                 | ref Mus musculus kalirin, RhoGEF kinase (Kalrn), transcript variant 1, mRNA [NM_177357]                             | 0.26                 | 0.026   | 0.341           | 0.36                  | 0.014   | 0.412           |
| Gtsf1                     | NM_028797                 | ref Mus musculus gametocyte specific factor 1 (Gtsf1), mRNA [NM_028797]                                             | 0.27                 | 0.027   | 0.342           | 0.34                  | 0.008   | 0.392           |
| Foxf2                     | NM_010225                 | ref Mus musculus forkhead box F2 (Foxf2), mRNA [NM_010225]                                                          | 0.45                 | 0.027   | 0.344           | 0.48                  | 0.020   | 0.447           |
| Cdk9                      | NM_130860                 | ref Mus musculus cyclin-dependent kinase 9 (CDC2-related kinase) (Cdk9), mRNA [NM_130860]                           | 0.69                 | 0.027   | 0.344           | 0.86                  | 0.015   | 0.418           |

| Online Supplemental Table IV: mG4H-STZ and Con-STZ Both |                           |                                                                                                                  |                      |         |                 |                       |         |                 |
|---------------------------------------------------------|---------------------------|------------------------------------------------------------------------------------------------------------------|----------------------|---------|-----------------|-----------------------|---------|-----------------|
| Gene Symbol                                             | RefSeq                    | Description                                                                                                      | logFC<br>Con-<br>STZ | P-value | Adj.<br>P-value | logFC<br>mG4H-<br>STZ | P-value | Adj.<br>P-value |
| Vsx1                                                    | NM_054068                 | ref Mus musculus visual system homeobox 1 homolog (zebrafish) (Vsx1), mRNA [NM_054068]                           | 0.58                 | 0.027   | 0.345           | 0.54                  | 0.018   | 0.435           |
| Pbld                                                    | NM_026701                 | ref Mus musculus phenazine biosynthesis-like protein domain containing (Pbld), mRNA [NM_026701]                  | 0.71                 | 0.027   | 0.345           | 0.70                  | 0.029   | 0.477           |
| chr17:13220550-13236900_R                               | chr17:13220550-13236900_R | lincRNA:chr17:13220550-13236900 reverse strand                                                                   | 0.49                 | 0.027   | 0.346           | 0.54                  | 0.030   | 0.480           |
| Gm4672                                                  | XM_001481025              | ref PREDICTED: Mus musculus hypothetical protein LOC100043822 (LOC100043822), mRNA [XM_001481025]                | 0.30                 | 0.027   | 0.347           | 0.41                  | 0.012   | 0.410           |
| Anxa7                                                   | NM_009674                 | ref Mus musculus annexin A7 (Anxa7), transcript variant 1, mRNA [NM_009674]                                      | 0.24                 | 0.027   | 0.347           | 0.25                  | 0.034   | 0.491           |
| chr18:61799195-61807139_F                               | chr18:61799195-61807139_F | lincRNA:chr18:61799195-61807139 forward strand                                                                   | 0.33                 | 0.027   | 0.348           | 0.50                  | 0.002   | 0.281           |
| Fam65c                                                  | NM_001080708              | ref Mus musculus family with sequence similarity 65, member C (Fam65c), mRNA [NM_001080708]                      | 0.46                 | 0.028   | 0.348           | 0.36                  | 0.045   | 0.513           |
| Slc19a3                                                 | NM_030556                 | ref Mus musculus solute carrier family 19 (sodium/hydrogen exchanger), member 3 (Slc19a3), mRNA [NM_030556]      | 0.41                 | 0.028   | 0.348           | 0.39                  | 0.024   | 0.463           |
| Plcd3                                                   | NM_152813                 | ref Mus musculus phospholipase C, delta 3 (Plcd3), mRNA [NM_152813]                                              | 0.28                 | 0.028   | 0.349           | 0.39                  | 0.050   | 0.520           |
| Tmem184a                                                | ENSMUST00000110832        | ens transmembrane protein 184a Gene [Source:MGI (curated);Acc:MGI:2385897] [ENSMUST00000110832]                  | 0.43                 | 0.028   | 0.351           | 0.54                  | 0.029   | 0.477           |
| Ppp2cb                                                  | NM_017374                 | ref Mus musculus protein phosphatase 2 (formerly 2A), catalytic subunit, beta isoform (Ppp2cb), mRNA [NM_017374] | 0.19                 | 0.028   | 0.351           | 0.19                  | 0.044   | 0.511           |
| Ppp1r2                                                  | NM_025800                 | ref Mus musculus protein phosphatase 1, regulatory (inhibitor) subunit 2 (Ppp1r2), mRNA [NM_025800]              | 0.29                 | 0.028   | 0.351           | 0.45                  | 0.022   | 0.450           |
| chr6:31017987-31174287_F                                | chr6:31017987-31174287_F  | lincRNA:chr6:31017987-31174287 forward strand                                                                    | 0.50                 | 0.028   | 0.353           | 0.58                  | 0.034   | 0.493           |
| Phf15                                                   | NM_199299                 | ref Mus musculus PHD finger protein 15 (Phf15), mRNA [NM_199299]                                                 | 0.49                 | 0.029   | 0.353           | 0.60                  | 0.023   | 0.456           |
| Zxdc                                                    | NM_173002                 | ref Mus musculus ZXD family zinc finger C (Zxdc), transcript variant 2, mRNA [NM_173002]                         | 0.37                 | 0.029   | 0.354           | 0.48                  | 0.035   | 0.495           |

Online Supplemental Table IV: mG4H-STZ and Con-STZ Both

| Gene Symbol                     | RefSeq                   | Description                                                                                                                                                  | logFC<br>Con-<br>STZ | P-value | Adj.<br>P-value | logFC<br>mG4H-<br>STZ | P-value | Adj.<br>P-value |
|---------------------------------|--------------------------|--------------------------------------------------------------------------------------------------------------------------------------------------------------|----------------------|---------|-----------------|-----------------------|---------|-----------------|
| <b>chr8:74333475-74384150_F</b> | chr8:74333475-74384150_F | lincRNA:chr8:74333475-74384150 forward strand                                                                                                                | 0.93                 | 0.029   | 0.354           | 0.98                  | 0.023   | 0.454           |
| <b>Gm12824</b>                  | NM_001085549             | ref  Mus musculus predicted gene 12824 (Gm12824), mRNA [NM_001085549]                                                                                        | 0.40                 | 0.029   | 0.354           | 0.57                  | 0.043   | 0.511           |
| <b>Magi1</b>                    | NM_001083321             | ref  Mus musculus membrane associated guanylate kinase, WW and PDZ domain containing 1 (Magi1), transcript variant 4, mRNA [NM_001083321]                    | 0.37                 | 0.029   | 0.355           | 0.41                  | 0.015   | 0.422           |
| <b>9030622O22Rik</b>            | XM_001481064             | ref PREDICTED: Mus musculus hypothetical protein LOC100048732 (LOC100048732), mRNA [XM_001481064]                                                            | 0.35                 | 0.029   | 0.356           | 0.53                  | 0.002   | 0.281           |
| <b>Sgcg</b>                     | NM_011892                | ref  Mus musculus sarcoglycan, gamma (dystrophin-associated glycoprotein) (Sgcg), mRNA [NM_011892]                                                           | 0.31                 | 0.029   | 0.358           | 0.41                  | 0.016   | 0.426           |
| <b>Rab3d</b>                    | NM_031874                | ref  Mus musculus RAB3D, member RAS oncogene family (Rab3d), mRNA [NM_031874]                                                                                | 0.27                 | 0.029   | 0.358           | 0.27                  | 0.023   | 0.454           |
| <b>LOC100041369</b>             | XM_001476252             | ref PREDICTED: Mus musculus hypothetical protein LOC100041369 (LOC100041369), mRNA [XM_001476252]                                                            | 0.40                 | 0.030   | 0.360           | 0.37                  | 0.033   | 0.488           |
| <b>Dcaf8</b>                    | NM_153555                | ref  Mus musculus DDB1 and CUL4 associated factor 8 (Dcaf8), mRNA [NM_153555]                                                                                | 0.24                 | 0.030   | 0.360           | 0.35                  | 0.009   | 0.398           |
| <b>chr1:85117750-85129200_R</b> | chr1:85117750-85129200_R | lincRNA:chr1:85117750-85129200 reverse strand                                                                                                                | 0.32                 | 0.030   | 0.361           | 0.38                  | 0.024   | 0.459           |
| <b>Etv4</b>                     | NM_008815                | ref  Mus musculus ets variant gene 4 (E1A enhancer binding protein, E1AF) (Etv4), mRNA [NM_008815]                                                           | 0.30                 | 0.030   | 0.362           | 0.44                  | 0.007   | 0.384           |
| <b>Nob1</b>                     | NM_026277                | ref  Mus musculus NIN1/RPN12 binding protein 1 homolog (S. cerevisiae) (Nob1), mRNA [NM_026277]                                                              | 0.20                 | 0.030   | 0.362           | 0.24                  | 0.019   | 0.439           |
| <b>Pparg</b>                    | NM_011146                | ref  Mus musculus peroxisome proliferator activated receptor gamma (Pparg), transcript variant 2, mRNA [NM_011146]                                           | 0.37                 | 0.030   | 0.362           | 0.42                  | 0.043   | 0.511           |
| <b>Gm1973</b>                   | AK005583                 | gb Mus musculus adult male testis cDNA, RIKEN full-length enriched library, clone:1700001E04 product: hypothetical protein, full insert sequence. [AK005583] | 0.32                 | 0.030   | 0.365           | 0.62                  | 0.001   | 0.210           |

| Online Supplemental Table IV: mG4H-STZ and Con-STZ Both |                            |                                                                                                                                                                                         |                      |         |                 |                       |         |                 |
|---------------------------------------------------------|----------------------------|-----------------------------------------------------------------------------------------------------------------------------------------------------------------------------------------|----------------------|---------|-----------------|-----------------------|---------|-----------------|
| Gene Symbol                                             | RefSeq                     | Description                                                                                                                                                                             | logFC<br>Con-<br>STZ | P-value | Adj.<br>P-value | logFC<br>mG4H-<br>STZ | P-value | Adj.<br>P-value |
| Phf7                                                    | NM_027949                  | ref Mus musculus PHD finger protein 7 (Phf7), mRNA [NM_027949]                                                                                                                          | 0.22                 | 0.031   | 0.367           | 0.31                  | 0.025   | 0.464           |
| Fcrl6                                                   | NM_001164725               | ref Mus musculus Fc receptor-like 6 (Fcrl6), mRNA [NM_001164725]                                                                                                                        | 0.45                 | 0.031   | 0.368           | 0.80                  | 0.002   | 0.281           |
| Sema5a                                                  | NM_009154                  | ref Mus musculus sema domain, seven thrombospondin repeats (type 1 and type 1-like), transmembrane domain (TM) and short cytoplasmic domain, (semaphorin) 5A (Sema5a), mRNA [NM_009154] | 0.51                 | 0.031   | 0.368           | 0.68                  | 0.024   | 0.458           |
| Cntf                                                    | NM_170786                  | ref Mus musculus ciliary neurotrophic factor (Cntf), mRNA [NM_170786]                                                                                                                   | 0.34                 | 0.031   | 0.368           | 0.61                  | 0.041   | 0.505           |
| Gm6611                                                  | XM_894394                  | ref PREDICTED: Mus musculus predicted gene, EG625660 (EG625660), mRNA [XM_894394]                                                                                                       | 0.45                 | 0.031   | 0.368           | 0.50                  | 0.018   | 0.436           |
| Ddx3x                                                   | NM_010028                  | ref Mus musculus DEAD/H (Asp-Glu-Ala-Asp/His) box polypeptide 3, X-linked (Ddx3x), mRNA [NM_010028]                                                                                     | 0.29                 | 0.031   | 0.370           | 0.41                  | 0.024   | 0.459           |
| Myoz2                                                   | NM_021503                  | ref Mus musculus myozenin 2 (Myoz2), mRNA [NM_021503]                                                                                                                                   | 0.29                 | 0.031   | 0.370           | 0.32                  | 0.026   | 0.468           |
| Olf117-ps                                               | ENSMUST00000099826         | ens olfactory receptor 1177 Gene [Source:MGI (curated);Acc:MGI:3031011] [ENSMUST00000099826]                                                                                            | 0.69                 | 0.031   | 0.371           | 0.81                  | 0.018   | 0.435           |
| Sf3b4                                                   | NM_153053                  | ref Mus musculus splicing factor 3b, subunit 4 (Sf3b4), mRNA [NM_153053]                                                                                                                | 0.19                 | 0.032   | 0.372           | 0.23                  | 0.027   | 0.472           |
| chr3:95443575-95462543_R                                | chr3:95443575-95462543_R   | lincRNA:chr3:95443575-95462543 reverse strand                                                                                                                                           | 0.25                 | 0.032   | 0.372           | 0.52                  | 0.001   | 0.169           |
| Heca                                                    | NM_001033432               | ref Mus musculus headcase homolog (Drosophila) (Heca), mRNA [NM_001033432]                                                                                                              | 0.44                 | 0.032   | 0.372           | 0.80                  | 0.013   | 0.412           |
| Uchl5                                                   | NM_019562                  | ref Mus musculus ubiquitin carboxyl-terminal esterase L5 (Uchl5), transcript variant 1, mRNA [NM_019562]                                                                                | 0.21                 | 0.032   | 0.373           | 0.30                  | 0.025   | 0.463           |
| chr1:183951156-183986156_F                              | chr1:183951156-183986156_F | lincRNA:chr1:183951156-183986156 forward strand                                                                                                                                         | 0.37                 | 0.032   | 0.374           | 0.36                  | 0.032   | 0.486           |
| Rsph1                                                   | NM_025290                  | ref Mus musculus radial spoke head 1 homolog (Chlamydomonas) (Rsph1), mRNA [NM_025290]                                                                                                  | 0.36                 | 0.032   | 0.375           | 0.35                  | 0.032   | 0.484           |
| Bnip3                                                   | NM_009760                  | ref Mus musculus BCL2/adenovirus E1B interacting protein 3 (Bnip3), nuclear gene encoding mitochondrial protein, mRNA [NM_009760]                                                       | 0.60                 | 0.032   | 0.376           | 0.64                  | 0.016   | 0.426           |

Online Supplemental Table IV: mG4H-STZ and Con-STZ Both

| Gene Symbol                       | RefSeq                     | Description                                                                                                         | logFC<br>Con-<br>STZ | P-value | Adj.<br>P-value | logFC<br>mG4H-<br>STZ | P-value | Adj.<br>P-value |
|-----------------------------------|----------------------------|---------------------------------------------------------------------------------------------------------------------|----------------------|---------|-----------------|-----------------------|---------|-----------------|
| <b>Plg</b>                        | NM_008877                  | ref Mus musculus plasminogen (Plg), mRNA [NM_008877]                                                                | 0.63                 | 0.033   | 0.376           | 0.94                  | 0.024   | 0.459           |
| <b>chr13:21860993-21862345_F</b>  | chr13:21860993-21862345_F  | lincRNA:chr13:21860993-21862345 forward strand                                                                      | 0.30                 | 0.033   | 0.376           | 0.38                  | 0.048   | 0.518           |
| <b>Nr1h4</b>                      | NM_001163504               | ref Mus musculus nuclear receptor subfamily 1, group H, member 4 (Nr1h4), transcript variant 2, mRNA [NM_001163504] | 0.32                 | 0.033   | 0.376           | 0.38                  | 0.027   | 0.472           |
| <b>ENSMUST00000066244</b>         | ENSMUST00000066244         | ens Uncharacterized protein KIAA0232 [Source:UniProtKB/Swiss-Prot;Acc:Q80U59] [ENSMUST00000066244]                  | 0.32                 | 0.033   | 0.377           | 0.46                  | 0.037   | 0.497           |
| <b>Sik3</b>                       | NM_027498                  | ref Mus musculus SIK family kinase 3 (Sik3), mRNA [NM_027498]                                                       | 0.37                 | 0.034   | 0.380           | 0.49                  | 0.039   | 0.501           |
| <b>D9Ertd788e</b>                 | BG295362                   | gb 602392661F1 NIH_MGC_94 Mus musculus cDNA clone IMAGE:4504431 5', mRNA sequence [BG295362]                        | 0.48                 | 0.034   | 0.382           | 0.36                  | 0.025   | 0.465           |
| <b>chr5:106353430-106353843_F</b> | chr5:106353430-106353843_F | lincRNA:chr5:106353430-106353843 forward strand                                                                     | 0.44                 | 0.034   | 0.382           | 0.44                  | 0.026   | 0.470           |
| <b>ErbB2ip</b>                    | NM_001005868               | ref Mus musculus ErbB2 interacting protein (ErbB2ip), transcript variant 1, mRNA [NM_001005868]                     | 0.23                 | 0.034   | 0.383           | 0.31                  | 0.019   | 0.439           |
| <b>Tmcc3</b>                      | NM_172051                  | ref Mus musculus transmembrane and coiled coil domains 3 (Tmcc3), transcript variant 1, mRNA [NM_172051]            | 0.35                 | 0.034   | 0.383           | 0.45                  | 0.021   | 0.450           |
| <b>Speer4b</b>                    | NM_028561                  | ref Mus musculus spermatogenesis associated glutamate (E)-rich protein 4b (Speer4b), mRNA [NM_028561]               | 0.55                 | 0.034   | 0.384           | 0.99                  | 0.013   | 0.412           |
| <b>Gm16515</b>                    | NM_025294                  | ref Mus musculus predicted gene, Gm16515 (Gm16515), mRNA [NM_025294]                                                | 0.29                 | 0.034   | 0.385           | 0.38                  | 0.018   | 0.435           |
| <b>Psat1</b>                      | NM_177420                  | ref Mus musculus phosphoserine aminotransferase 1 (Psat1), mRNA [NM_177420]                                         | 0.37                 | 0.034   | 0.386           | 0.35                  | 0.041   | 0.506           |
| <b>chr8:26343277-26352902_R</b>   | chr8:26343277-26352902_R   | lincRNA:chr8:26343277-26352902 reverse strand                                                                       | 0.35                 | 0.035   | 0.387           | 0.40                  | 0.035   | 0.495           |
| <b>chr8:26428975-26490975_R</b>   | chr8:26428975-26490975_R   | lincRNA:chr8:26428975-26490975 reverse strand                                                                       | 0.48                 | 0.035   | 0.388           | 0.68                  | 0.012   | 0.408           |

Online Supplemental Table IV: mG4H-STZ and Con-STZ Both

| Gene Symbol                | RefSeq                     | Description                                                                                                   | logFC<br>Con-<br>STZ | P-value | Adj.<br>P-value | logFC<br>mG4H-<br>STZ | P-value | Adj.<br>P-value |
|----------------------------|----------------------------|---------------------------------------------------------------------------------------------------------------|----------------------|---------|-----------------|-----------------------|---------|-----------------|
| Dmd                        | NM_007868                  | ref Mus musculus dystrophin, muscular dystrophy (Dmd), mRNA [NM_007868]                                       | 0.43                 | 0.035   | 0.388           | 0.63                  | 0.038   | 0.499           |
| chr12:3199327-3200827_F    | chr12:3199327-3200827_F    | lincRNA:chr12:3199327-3200827 forward strand                                                                  | 0.28                 | 0.035   | 0.388           | 0.31                  | 0.019   | 0.439           |
| chr1:85156338-85167730_R   | chr1:85156338-85167730_R   | lincRNA:chr1:85156338-85167730 reverse strand                                                                 | 0.31                 | 0.035   | 0.388           | 0.33                  | 0.030   | 0.479           |
| chr1:161969026-162001640_F | chr1:161969026-162001640_F | lincRNA:chr1:161969026-162001640 forward strand                                                               | 0.44                 | 0.035   | 0.388           | 0.39                  | 0.023   | 0.453           |
| Psmd11                     | NM_178616                  | ref Mus musculus proteasome (prosome, macropain) 26S subunit, non-ATPase, 11 (Psmd11), mRNA [NM_178616]       | 0.31                 | 0.035   | 0.389           | 0.35                  | 0.048   | 0.517           |
| Olfr508                    | NM_146773                  | ref Mus musculus olfactory receptor 508 (Olfr508), mRNA [NM_146773]                                           | 0.51                 | 0.035   | 0.391           | 0.56                  | 0.033   | 0.490           |
| chr1:138570107-138632310_R | chr1:138570107-138632310_R | lincRNA:chr1:138570107-138632310 reverse strand                                                               | 0.37                 | 0.035   | 0.391           | 0.33                  | 0.034   | 0.493           |
| Slc30a4                    | NM_011774                  | ref Mus musculus solute carrier family 30 (zinc transporter), member 4 (Slc30a4), mRNA [NM_011774]            | 0.26                 | 0.035   | 0.391           | 0.32                  | 0.013   | 0.412           |
| Btg3                       | NM_009770                  | ref Mus musculus B-cell translocation gene 3 (Btg3), mRNA [NM_009770]                                         | 0.34                 | 0.035   | 0.391           | 0.42                  | 0.007   | 0.384           |
| Cry2                       | NM_001113333               | ref Mus musculus cryptochrome 2 (photolyase-like) (Cry2), transcript variant 2, mRNA [NM_001113333]           | 0.26                 | 0.036   | 0.391           | 0.40                  | 0.039   | 0.500           |
| chr18:5119300-5181600_R    | chr18:5119300-5181600_R    | lincRNA:chr18:5119300-5181600 reverse strand                                                                  | 0.42                 | 0.036   | 0.392           | 0.47                  | 0.044   | 0.512           |
| Zfp703                     | NM_001110508               | ref Mus musculus zinc finger protein 703 (Zfp703), transcript variant 2, mRNA [NM_001110508]                  | 0.26                 | 0.036   | 0.392           | 0.46                  | 0.022   | 0.452           |
| Gm14048                    | XR_005128                  | ref PREDICTED: Mus musculus similar to proteasome 26S non-ATPase subunit 11 (LOC627316), misc RNA [XR_005128] | 0.30                 | 0.036   | 0.393           | 0.36                  | 0.029   | 0.477           |
| XM_001477039               | XM_001477039               | ref PREDICTED: Mus musculus similar to quaking type II (LOC675815), mRNA [XM_001477039]                       | 0.46                 | 0.036   | 0.393           | 0.53                  | 0.046   | 0.513           |
| chr1:138570107-138632310_R | chr1:138570107-138632310_R | lincRNA:chr1:138570107-138632310 reverse strand                                                               | 0.38                 | 0.036   | 0.394           | 0.82                  | 0.000   | 0.098           |



Online Supplemental Table IV: mG4H-STZ and Con-STZ Both

| Gene Symbol                       | RefSeq                     | Description                                                                                                       | logFC<br>Con-<br>STZ | P-value | Adj.<br>P-value | logFC<br>mG4H-<br>STZ | P-value | Adj.<br>P-value |
|-----------------------------------|----------------------------|-------------------------------------------------------------------------------------------------------------------|----------------------|---------|-----------------|-----------------------|---------|-----------------|
| <b>Nsa2</b>                       | NM_021552                  | ref Mus musculus NSA2 ribosome biogenesis homolog (S. cerevisiae) (Nsa2), mRNA [NM_021552]                        | 0.23                 | 0.036   | 0.395           | 0.27                  | 0.027   | 0.473           |
| <b>chr9:88338621-88338923_F</b>   | chr9:88338621-88338923_F   | lincRNA:chr9:88338621-88338923 forward strand                                                                     | 0.39                 | 0.036   | 0.395           | 0.53                  | 0.012   | 0.408           |
| <b>chr19:7458725-7474825_F</b>    | chr19:7458725-7474825_F    | lincRNA:chr19:7458725-7474825 forward strand                                                                      | 0.34                 | 0.037   | 0.398           | 0.44                  | 0.050   | 0.520           |
| <b>Mlycd</b>                      | NM_019966                  | ref Mus musculus malonyl-CoA decarboxylase (Mlycd), nuclear gene encoding mitochondrial protein, mRNA [NM_019966] | 0.27                 | 0.037   | 0.399           | 0.23                  | 0.040   | 0.504           |
| <b>chr6:122725638-122752828_F</b> | chr6:122725638-122752828_F | lincRNA:chr6:122725638-122752828 forward strand                                                                   | 0.35                 | 0.037   | 0.399           | 0.49                  | 0.010   | 0.406           |
| <b>D830031N03Rik</b>              | NM_001167918               | ref Mus musculus RIKEN cDNA D830031N03 gene (D830031N03Rik), mRNA [NM_001167918]                                  | 0.59                 | 0.037   | 0.400           | 0.96                  | 0.022   | 0.453           |
| <b>lincP21</b>                    | lincP21                    | lincRNA:chr17:29194418-29215906 reverse strand                                                                    | 0.43                 | 0.037   | 0.401           | 0.56                  | 0.020   | 0.447           |
| <b>Tmem38b</b>                    | NM_028053                  | ref Mus musculus transmembrane protein 38B (Tmem38b), mRNA [NM_028053]                                            | 0.47                 | 0.038   | 0.402           | 0.70                  | 0.043   | 0.509           |
| <b>Gm8663</b>                     | XR_002172                  | ref PREDICTED: Mus musculus predicted gene, EG667490 (EG667490), misc RNA [XR_002172]                             | 0.22                 | 0.038   | 0.404           | 0.35                  | 0.042   | 0.508           |
| <b>chr18:57104718-57105355_F</b>  | chr18:57104718-57105355_F  | lincRNA:chr18:57104718-57105355 forward strand                                                                    | 0.33                 | 0.038   | 0.405           | 0.45                  | 0.027   | 0.472           |
| <b>chr2:48807211-48843911_F</b>   | chr2:48807211-48843911_F   | lincRNA:chr2:48807211-48843911 forward strand                                                                     | 0.42                 | 0.038   | 0.406           | 0.56                  | 0.006   | 0.369           |
| <b>Trib1</b>                      | NM_144549                  | ref Mus musculus tribbles homolog 1 (Drosophila) (Trib1), mRNA [NM_144549]                                        | 0.30                 | 0.038   | 0.407           | 0.37                  | 0.041   | 0.505           |
| <b>Gm5092</b>                     | XM_001477465               | ref PREDICTED: Mus musculus hypothetical protein 4933430A09 (4933430A09), mRNA [XM_001477465]                     | 1.25                 | 0.038   | 0.407           | 1.22                  | 0.041   | 0.506           |
| <b>Scyl2</b>                      | NM_198021                  | ref Mus musculus SCY1-like 2 (S. cerevisiae) (Scyl2), mRNA [NM_198021]                                            | 0.27                 | 0.039   | 0.407           | 0.47                  | 0.045   | 0.513           |
| <b>Rcc2</b>                       | NM_173867                  | ref Mus musculus regulator of chromosome condensation 2 (Rcc2), mRNA [NM_173867]                                  | 0.22                 | 0.039   | 0.407           | 0.34                  | 0.028   | 0.474           |
| <b>Pdcl3</b>                      | NM_026850                  | ref Mus musculus phosducin-like 3 (Pdcl3), mRNA [NM_026850]                                                       | 0.21                 | 0.039   | 0.409           | 0.23                  | 0.049   | 0.519           |

| Online Supplemental Table IV: mG4H-STZ and Con-STZ Both |                           |                                                                                                                                                               |                      |         |                 |                       |         |                 |
|---------------------------------------------------------|---------------------------|---------------------------------------------------------------------------------------------------------------------------------------------------------------|----------------------|---------|-----------------|-----------------------|---------|-----------------|
| Gene Symbol                                             | RefSeq                    | Description                                                                                                                                                   | logFC<br>Con-<br>STZ | P-value | Adj.<br>P-value | logFC<br>mG4H-<br>STZ | P-value | Adj.<br>P-value |
| Sumo3                                                   | NM_019929                 | ref Mus musculus SMT3 suppressor of mif two 3 homolog 3 (yeast) (Sumo3), mRNA [NM_019929]                                                                     | 0.21                 | 0.039   | 0.409           | 0.31                  | 0.018   | 0.435           |
| Csnk1e                                                  | NM_013767                 | ref Mus musculus casein kinase 1, epsilon (Csnk1e), mRNA [NM_013767]                                                                                          | 0.27                 | 0.039   | 0.412           | 0.44                  | 0.041   | 0.505           |
| chr2:79521628-79521871_F                                | chr2:79521628-79521871_F  | lincRNA:chr2:79521628-79521871 forward strand                                                                                                                 | 0.38                 | 0.039   | 0.412           | 0.47                  | 0.047   | 0.515           |
| chr2:79517813-79518321_F                                | chr2:79517813-79518321_F  | lincRNA:chr2:79517813-79518321 forward strand                                                                                                                 | 0.28                 | 0.039   | 0.412           | 0.46                  | 0.049   | 0.519           |
| chr9:14460976-14488051_R                                | chr9:14460976-14488051_R  | lincRNA:chr9:14460976-14488051 reverse strand                                                                                                                 | 0.45                 | 0.039   | 0.412           | 0.38                  | 0.041   | 0.505           |
| Ppm1e                                                   | NM_177167                 | ref Mus musculus protein phosphatase 1E (PP2C domain containing) (Ppm1e), mRNA [NM_177167]                                                                    | 0.35                 | 0.040   | 0.413           | 0.29                  | 0.036   | 0.496           |
| LOC100216343                                            | AK040843                  | gb Mus musculus adult male aorta and vein cDNA, RIKEN full-length enriched library, clone:A530029P05 product:unclassifiable, full insert sequence. [AK040843] | 0.44                 | 0.040   | 0.413           | 0.65                  | 0.018   | 0.435           |
| Rbm33                                                   | NM_028234                 | ref Mus musculus RNA binding motif protein 33 (Rbm33), mRNA [NM_028234]                                                                                       | 0.26                 | 0.040   | 0.416           | 0.52                  | 0.049   | 0.519           |
| Cpsf7                                                   | NM_172302                 | ref Mus musculus cleavage and polyadenylation specific factor 7 (Cpsf7), transcript variant 1, mRNA [NM_172302]                                               | 0.16                 | 0.040   | 0.416           | 0.22                  | 0.041   | 0.506           |
| Olfr1490                                                | NM_001011832              | ref Mus musculus olfactory receptor 1490 (Olfr1490), mRNA [NM_001011832]                                                                                      | 0.51                 | 0.040   | 0.416           | 0.50                  | 0.038   | 0.499           |
| chr14:27930334-27930974_F                               | chr14:27930334-27930974_F | lincRNA:chr14:27930334-27930974 forward strand                                                                                                                | 0.41                 | 0.040   | 0.416           | 0.63                  | 0.022   | 0.452           |
| Gm4212                                                  | XM_001479085              | ref PREDICTED: Mus musculus hypothetical protein LOC100043076 (LOC100043076), mRNA [XM_001479085]                                                             | 0.56                 | 0.040   | 0.417           | 0.63                  | 0.044   | 0.511           |
| Ptch1                                                   | ENSMUST00000021921        | ens patched homolog 1 Gene [Source:MGI Symbol;Acc:MGI:105373] [ENSMUST00000021921]                                                                            | 0.43                 | 0.041   | 0.418           | 0.63                  | 0.017   | 0.435           |
| Dhx15                                                   | NM_001042620              | ref Mus musculus DEAH (Asp-Glu-Ala-His) box polypeptide 15 (Dhx15), transcript variant 1, mRNA [NM_001042620]                                                 | 0.19                 | 0.041   | 0.418           | 0.30                  | 0.029   | 0.477           |

Online Supplemental Table IV: mG4H-STZ and Con-STZ Both

| Gene Symbol                | RefSeq                     | Description                                                                                                 | logFC<br>Con-STZ | P-value | Adj.<br>P-value | logFC<br>mG4H-STZ | P-value | Adj.<br>P-value |
|----------------------------|----------------------------|-------------------------------------------------------------------------------------------------------------|------------------|---------|-----------------|-------------------|---------|-----------------|
| LOC100048018               | XM_001479650               | ref  PREDICTED: Mus musculus similar to complement component factor H (LOC100048018), mRNA [XM_001479650]   | 0.35             | 0.041   | 0.421           | 0.37              | 0.042   | 0.507           |
| E2f3                       | NM_010093                  | ref  Mus musculus E2F transcription factor 3 (E2f3), mRNA [NM_010093]                                       | 0.21             | 0.041   | 0.421           | 0.23              | 0.048   | 0.516           |
| Spty2d1                    | NM_175318                  | ref  Mus musculus SPT2, Suppressor of Ty, domain containing 1 (S. cerevisiae) (Spty2d1), mRNA [NM_175318]   | 0.21             | 0.042   | 0.423           | 0.31              | 0.026   | 0.471           |
| Plagl1                     | NM_009538                  | ref  Mus musculus pleiomorphic adenoma gene-like 1 (Plagl1), mRNA [NM_009538]                               | 0.24             | 0.042   | 0.424           | 0.39              | 0.008   | 0.392           |
| chr15:32167516-32174417_R  | chr15:32167516-32174417_R  | lincRNA:chr15:32167516-32174417 reverse strand                                                              | 0.36             | 0.042   | 0.426           | 0.41              | 0.003   | 0.281           |
| Csnk1e                     | NM_013767                  | ref  Mus musculus casein kinase 1, epsilon (Csnk1e), mRNA [NM_013767]                                       | 0.27             | 0.043   | 0.427           | 0.41              | 0.039   | 0.501           |
| chr8:34646787-34680312_R   | chr8:34646787-34680312_R   | lincRNA:chr8:34646787-34680312 reverse strand                                                               | 0.56             | 0.043   | 0.427           | 0.63              | 0.023   | 0.454           |
| Foxk1                      | NM_199068                  | ref  Mus musculus forkhead box K1 (Foxk1), mRNA [NM_199068]                                                 | 0.27             | 0.043   | 0.429           | 0.33              | 0.027   | 0.471           |
| Gm10837                    | ENSMUST00000100294         | ens  Putative uncharacterized protein [Source:UniProtKB/TrEMBL;Acc:Q3UTT8] [ENSMUST00000100294]             | 0.33             | 0.043   | 0.429           | 0.36              | 0.040   | 0.501           |
| Gm8149                     | XM_001475155               | ref  PREDICTED: Mus musculus predicted gene, EG666529, transcript variant 1 (EG666529), mRNA [XM_001475155] | 0.57             | 0.044   | 0.430           | 0.64              | 0.042   | 0.507           |
| Prune                      | NM_173347                  | ref  Mus musculus prune homolog (Drosophila) (Prune), mRNA [NM_173347]                                      | 0.24             | 0.044   | 0.431           | 0.27              | 0.039   | 0.500           |
| Mmp27                      | NM_001030289               | ref  Mus musculus matrix metalloproteinase 27 (Mmp27), mRNA [NM_001030289]                                  | 0.28             | 0.044   | 0.435           | 0.40              | 0.019   | 0.441           |
| chr7:137669440-137672712_F | chr7:137669440-137672712_F | lincRNA:chr7:137669440-137672712 forward strand                                                             | 0.41             | 0.045   | 0.437           | 0.37              | 0.031   | 0.481           |
| Ddx27                      | NM_153065                  | ref  Mus musculus DEAD (Asp-Glu-Ala-Asp) box polypeptide 27 (Ddx27), mRNA [NM_153065]                       | 0.18             | 0.045   | 0.437           | 0.30              | 0.026   | 0.470           |

Online Supplemental Table IV: mG4H-STZ and Con-STZ Both

| Gene Symbol                | RefSeq                     | Description                                                                                                                                           | logFC<br>Con-<br>STZ | P-value | Adj.<br>P-value | logFC<br>mG4H-<br>STZ | P-value | Adj.<br>P-value |
|----------------------------|----------------------------|-------------------------------------------------------------------------------------------------------------------------------------------------------|----------------------|---------|-----------------|-----------------------|---------|-----------------|
| Vmn2r109                   | NM_001104571               | ref Mus musculus vomeronasal 2, receptor 109 (Vmn2r109), mRNA [NM_001104571]                                                                          | 0.65                 | 0.045   | 0.441           | 0.63                  | 0.044   | 0.512           |
| AA763521                   | BX523390                   | gb BX523390 Knowles Solter mouse 2 cell Mus musculus cDNA clone IMAGp998P122704 ; IMAGE:1080827, mRNA sequence [BX523390]                             | 0.29                 | 0.046   | 0.443           | 0.35                  | 0.036   | 0.495           |
| Ubqln1                     | NM_152234                  | ref Mus musculus ubiquilin 1 (Ubqln1), transcript variant 2, mRNA [NM_152234]                                                                         | 0.23                 | 0.046   | 0.443           | 0.37                  | 0.040   | 0.501           |
| Ulk3                       | NM_027895                  | ref Mus musculus unc-51-like kinase 3 (C. elegans) (Ulk3), mRNA [NM_027895]                                                                           | 0.83                 | 0.046   | 0.443           | 0.93                  | 0.008   | 0.391           |
| Prph                       | NM_013639                  | ref Mus musculus peripherin (Prph), transcript variant 1, mRNA [NM_013639]                                                                            | 0.34                 | 0.046   | 0.444           | 0.40                  | 0.018   | 0.435           |
| Ctdsp2                     | NM_146012                  | ref Mus musculus CTD (carboxy-terminal domain, RNA polymerase II, polypeptide A) small phosphatase 2 (Ctdsp2), transcript variant b, mRNA [NM_146012] | 0.27                 | 0.046   | 0.444           | 0.41                  | 0.012   | 0.410           |
| Rplp0                      | NM_007475                  | ref Mus musculus ribosomal protein, large, P0 (Rplp0), mRNA [NM_007475]                                                                               | 0.21                 | 0.046   | 0.444           | 0.29                  | 0.015   | 0.421           |
| Ppp1r12a                   | NM_027892                  | ref Mus musculus protein phosphatase 1, regulatory (inhibitor) subunit 12A (Ppp1r12a), mRNA [NM_027892]                                               | 0.28                 | 0.047   | 0.446           | 0.35                  | 0.049   | 0.519           |
| chr14:73729977-73751877_R  | chr14:73729977-73751877_R  | lincRNA:chr14:73729977-73751877 reverse strand                                                                                                        | 0.42                 | 0.047   | 0.446           | 0.58                  | 0.014   | 0.418           |
| Il1f8                      | NM_027163                  | ref Mus musculus interleukin 1 family, member 8 (Il1f8), mRNA [NM_027163]                                                                             | 0.61                 | 0.047   | 0.446           | 0.64                  | 0.015   | 0.420           |
| chr2:112014068-112049540_F | chr2:112014068-112049540_F | lincRNA:chr2:112014068-112049540 forward strand                                                                                                       | 0.37                 | 0.047   | 0.446           | 0.57                  | 0.013   | 0.412           |
| Cyp4f15                    | NM_134127                  | ref Mus musculus cytochrome P450, family 4, subfamily f, polypeptide 15 (Cyp4f15), mRNA [NM_134127]                                                   | 0.43                 | 0.047   | 0.446           | 0.54                  | 0.018   | 0.435           |
| chr9:88333945-88342370_R   | chr9:88333945-88342370_R   | lincRNA:chr9:88333945-88342370 reverse strand                                                                                                         | 0.39                 | 0.047   | 0.447           | 0.66                  | 0.014   | 0.418           |
| Spata19                    | NM_029299                  | ref Mus musculus spermatogenesis associated 19 (Spata19), mRNA [NM_029299]                                                                            | 0.53                 | 0.047   | 0.447           | 0.45                  | 0.046   | 0.513           |
| Cdon                       | NM_021339                  | ref Mus musculus cell adhesion molecule-related/down-regulated by oncogenes (Cdon), mRNA [NM_021339]                                                  | 0.30                 | 0.047   | 0.447           | 0.48                  | 0.008   | 0.391           |

| Online Supplemental Table IV: mG4H-STZ and Con-STZ Both |                           |                                                                                                                                                                        |                      |         |                 |                       |         |                 |
|---------------------------------------------------------|---------------------------|------------------------------------------------------------------------------------------------------------------------------------------------------------------------|----------------------|---------|-----------------|-----------------------|---------|-----------------|
| Gene Symbol                                             | RefSeq                    | Description                                                                                                                                                            | logFC<br>Con-<br>STZ | P-value | Adj.<br>P-value | logFC<br>mG4H-<br>STZ | P-value | Adj.<br>P-value |
| <b>ENSMUST00000116172</b>                               | ENSMUST00000116172        | ens Putative uncharacterized protein Fragment [Source:UniProtKB/TrEMBL;Acc:Q3UXY7] [ENSMUST00000116172]                                                                | 0.31                 | 0.047   | 0.447           | 0.34                  | 0.023   | 0.454           |
| <b>Sidt2</b>                                            | NM_172257                 | ref Mus musculus SID1 transmembrane family, member 2 (Sidt2), mRNA [NM_172257]                                                                                         | 0.31                 | 0.047   | 0.447           | 0.43                  | 0.016   | 0.426           |
| <b>1110015O18Rik</b>                                    | AK003731                  | gb Mus musculus 18-day embryo whole body cDNA, RIKEN full-length enriched library, clone:1110015O18 product:unclassifiable, full insert sequence. [AK003731]           | 0.52                 | 0.047   | 0.447           | 0.48                  | 0.027   | 0.472           |
| <b>Hnrpd1</b>                                           | NM_016690                 | ref Mus musculus heterogeneous nuclear ribonucleoprotein D-like (Hnrpd1), mRNA [NM_016690]                                                                             | 0.23                 | 0.047   | 0.448           | 0.37                  | 0.019   | 0.441           |
| <b>Ddx50</b>                                            | NM_053183                 | ref Mus musculus DEAD (Asp-Glu-Ala-Asp) box polypeptide 50 (Ddx50), mRNA [NM_053183]                                                                                   | 0.22                 | 0.048   | 0.449           | 0.39                  | 0.014   | 0.416           |
| <b>Gbx2</b>                                             | NM_010262                 | ref Mus musculus gastrulation brain homeobox 2 (Gbx2), mRNA [NM_010262]                                                                                                | 0.40                 | 0.048   | 0.449           | 0.51                  | 0.020   | 0.443           |
| <b>Prepl</b>                                            | NM_001163622              | ref Mus musculus prolyl endopeptidase-like (Prepl), transcript variant 1, mRNA [NM_001163622]                                                                          | 0.23                 | 0.048   | 0.449           | 0.29                  | 0.022   | 0.450           |
| <b>ENSMUST00000115034</b>                               | ENSMUST00000115034        | ens SWI/SNF related, matrix associated, actin dependent regulator of chromatin, subfamily a, member 1 Gene [Source:MGI (curated);Acc:MGI:1935127] [ENSMUST00000115034] | 0.31                 | 0.048   | 0.449           | 0.39                  | 0.018   | 0.437           |
| <b>Rassf1</b>                                           | NM_019713                 | ref Mus musculus Ras association (RalGDS/AF-6) domain family member 1 (Rassf1), mRNA [NM_019713]                                                                       | 0.22                 | 0.048   | 0.450           | 0.31                  | 0.040   | 0.501           |
| <b>Aire</b>                                             | NM_009646                 | ref Mus musculus autoimmune regulator (autoimmune polyendocrinopathy candidiasis ectodermal dystrophy) (Aire), mRNA [NM_009646]                                        | 0.40                 | 0.048   | 0.450           | 0.53                  | 0.004   | 0.338           |
| <b>Ltbp2</b>                                            | NM_013589                 | ref Mus musculus latent transforming growth factor beta binding protein 2 (Ltbp2), mRNA [NM_013589]                                                                    | 0.67                 | 0.048   | 0.451           | 0.46                  | 0.021   | 0.449           |
| <b>Ankrd34a</b>                                         | NM_001024851              | ref Mus musculus ankyrin repeat domain 34A (Ankrd34a), mRNA [NM_001024851]                                                                                             | 0.29                 | 0.049   | 0.455           | 0.40                  | 0.009   | 0.398           |
| <b>chr10:39383665-39442690_R</b>                        | chr10:39383665-39442690_R | lincRNA:chr10:39383665-39442690 reverse strand                                                                                                                         | 0.92                 | 0.049   | 0.456           | 1.02                  | 0.032   | 0.484           |

Online Supplemental Table IV: mG4H-STZ and Con-STZ Both

| Gene Symbol                      | RefSeq                    | Description                                                                                                                     | logFC<br>Con-<br>STZ | P-value | Adj.<br>P-value | logFC<br>mG4H-<br>STZ | P-value | Adj.<br>P-value |
|----------------------------------|---------------------------|---------------------------------------------------------------------------------------------------------------------------------|----------------------|---------|-----------------|-----------------------|---------|-----------------|
| <b>Klc4</b>                      | NM_029091                 | ref Mus musculus kinesin light chain 4 (Klc4), mRNA [NM_029091]                                                                 | 0.18                 | 0.049   | 0.456           | 0.30                  | 0.037   | 0.497           |
| <b>chr13:66381200-66410200_R</b> | chr13:66381200-66410200_R | lincRNA:chr13:66381200-66410200 reverse strand                                                                                  | 0.38                 | 0.049   | 0.456           | 0.75                  | 0.005   | 0.346           |
| <b>chr15:73227424-73257474_F</b> | chr15:73227424-73257474_F | lincRNA:chr15:73227424-73257474 forward strand                                                                                  | 0.41                 | 0.049   | 0.456           | 0.50                  | 0.031   | 0.482           |
| <b>Btn2a2</b>                    | NM_175938                 | ref Mus musculus butyrophilin, subfamily 2, member A2 (Btn2a2), mRNA [NM_175938]                                                | 0.96                 | 0.050   | 0.457           | 1.22                  | 0.018   | 0.436           |
| <b>Ces7</b>                      | NM_001003951              | ref Mus musculus carboxylesterase 7 (Ces7), mRNA [NM_001003951]                                                                 | 0.32                 | 0.050   | 0.458           | 0.49                  | 0.002   | 0.266           |
| <b>Rasl10a</b>                   | NM_145216                 | ref Mus musculus RAS-like, family 10, member A (Rasl10a), mRNA [NM_145216]                                                      | -1.27                | 0.000   | 0.001           | -0.92                 | 0.003   | 0.290           |
| <b>Prss55</b>                    | NM_001081063              | ref Mus musculus protease, serine, 55 (Prss55), mRNA [NM_001081063]                                                             | -1.51                | 0.000   | 0.001           | -1.02                 | 0.001   | 0.167           |
| <b>Cacna1g</b>                   | NM_009783                 | ref Mus musculus calcium channel, voltage-dependent, T type, alpha 1G subunit (Cacna1g), transcript variant 1, mRNA [NM_009783] | -1.25                | 0.000   | 0.001           | -1.07                 | 0.000   | 0.022           |
| <b>Grin3b</b>                    | NM_130455                 | ref Mus musculus glutamate receptor, ionotropic, NMDA3B (Grin3b), mRNA [NM_130455]                                              | -1.23                | 0.000   | 0.001           | -1.26                 | 0.000   | 0.042           |
| <b>Hcn2</b>                      | NM_008226                 | ref Mus musculus hyperpolarization-activated, cyclic nucleotide-gated K+ 2 (Hcn2), mRNA [NM_008226]                             | -0.96                | 0.000   | 0.002           | -0.77                 | 0.000   | 0.042           |
| <b>Snrnp25</b>                   | NM_030093                 | ref Mus musculus small nuclear ribonucleoprotein 25 (U11/U12) (Snrnp25), mRNA [NM_030093]                                       | -0.60                | 0.000   | 0.003           | -0.50                 | 0.001   | 0.169           |
| <b>Thrsp</b>                     | NM_009381                 | ref Mus musculus thyroid hormone responsive SPOT14 homolog (Rattus) (Thrsp), mRNA [NM_009381]                                   | -1.21                | 0.000   | 0.003           | -1.07                 | 0.000   | 0.048           |
| <b>Aqp1</b>                      | NM_007472                 | ref Mus musculus aquaporin 1 (Aqp1), mRNA [NM_007472]                                                                           | -1.29                | 0.000   | 0.003           | -0.81                 | 0.022   | 0.450           |
| <b>Tmem179</b>                   | NM_178915                 | ref Mus musculus transmembrane protein 179 (Tmem179), mRNA [NM_178915]                                                          | -0.72                | 0.000   | 0.003           | -0.39                 | 0.009   | 0.398           |
| <b>Dhrs7c</b>                    | NM_001013013              | ref Mus musculus dehydrogenase/reductase (SDR family) member 7C (Dhrs7c), mRNA [NM_001013013]                                   | -1.00                | 0.000   | 0.003           | -0.66                 | 0.001   | 0.248           |
| <b>chr13:28477490-28985604_R</b> | chr13:28477490-28985604_R | lincRNA:chr13:28477490-28985604 reverse strand                                                                                  | -0.88                | 0.000   | 0.003           | -0.79                 | 0.001   | 0.169           |



| Online Supplemental Table IV: mG4H-STZ and Con-STZ Both |                    |                                                                                                                           |                      |         |                 |                       |         |                 |
|---------------------------------------------------------|--------------------|---------------------------------------------------------------------------------------------------------------------------|----------------------|---------|-----------------|-----------------------|---------|-----------------|
| Gene Symbol                                             | RefSeq             | Description                                                                                                               | logFC<br>Con-<br>STZ | P-value | Adj.<br>P-value | logFC<br>mG4H-<br>STZ | P-value | Adj.<br>P-value |
| Lrp3                                                    | NM_001024707       | ref Mus musculus low density lipoprotein receptor-related protein 3 (Lrp3), mRNA [NM_001024707]                           | -0.72                | 0.000   | 0.003           | -0.44                 | 0.002   | 0.281           |
| Fam81a                                                  | NM_029784          | ref Mus musculus family with sequence similarity 81, member A (Fam81a), mRNA [NM_029784]                                  | -1.12                | 0.000   | 0.004           | -1.01                 | 0.002   | 0.257           |
| Cux2                                                    | ENSMUST00000111752 | ens cut-like homeobox 2 Gene [Source:MGI (curated);Acc:MGI:107321] [ENSMUST00000111752]                                   | -1.36                | 0.000   | 0.004           | -0.98                 | 0.001   | 0.210           |
| Cryba4                                                  | NM_021351          | ref Mus musculus crystallin, beta A4 (Cryba4), mRNA [NM_021351]                                                           | -1.32                | 0.000   | 0.004           | -1.04                 | 0.009   | 0.393           |
| Camk2b                                                  | NM_001174053       | ref Mus musculus calcium/calmodulin-dependent protein kinase II, beta (Camk2b), transcript variant 1, mRNA [NM_001174053] | -1.04                | 0.000   | 0.004           | -0.84                 | 0.002   | 0.257           |
| ENSMUST00000108435                                      | ENSMUST00000108435 | ens TLC domain containing 2 Gene [Source:MGI (curated);Acc:MGI:1917141] [ENSMUST00000108435]                              | -1.04                | 0.000   | 0.004           | -0.84                 | 0.000   | 0.118           |
| Foxo6                                                   | NM_194060          | ref Mus musculus forkhead box O6 (Foxo6), mRNA [NM_194060]                                                                | -1.92                | 0.000   | 0.004           | -1.32                 | 0.000   | 0.148           |
| Cyfp2                                                   | NM_133769          | ref Mus musculus cytoplasmic FMR1 interacting protein 2 (Cyfp2), mRNA [NM_133769]                                         | -0.87                | 0.000   | 0.004           | -0.83                 | 0.001   | 0.171           |
| Gm14492                                                 | NR_033261          | ref Mus musculus predicted gene 14492 (Gm14492), non-coding RNA [NR_033261]                                               | -1.38                | 0.000   | 0.005           | -0.96                 | 0.010   | 0.403           |
| ENSMUST00000106604                                      | ENSMUST00000106604 | ens RIKEN cDNA 1700092K14 gene Gene [Source:MGI Symbol;Acc:MGI:1920786] [ENSMUST00000106604]                              | -1.20                | 0.000   | 0.005           | -1.22                 | 0.001   | 0.227           |
| Pla2g5                                                  | NM_011110          | ref Mus musculus phospholipase A2, group V (Pla2g5), transcript variant 2, mRNA [NM_011110]                               | -0.83                | 0.000   | 0.005           | -0.47                 | 0.001   | 0.167           |
| Clvs1                                                   | NM_028940          | ref Mus musculus clavesin 1 (Clvs1), mRNA [NM_028940]                                                                     | -1.36                | 0.000   | 0.005           | -0.61                 | 0.001   | 0.222           |
| Mylk4                                                   | NM_001166030       | ref Mus musculus myosin light chain kinase family, member 4 (Mylk4), mRNA [NM_001166030]                                  | -1.55                | 0.000   | 0.006           | -0.97                 | 0.000   | 0.157           |
| Plekhh1                                                 | NM_181073          | ref Mus musculus pleckstrin homology domain containing, family H (with MyTH4 domain) member 1 (Plekhh1), mRNA [NM_181073] | -1.28                | 0.000   | 0.006           | -1.23                 | 0.000   | 0.048           |
| Ssx2ip                                                  | NM_138744          | ref Mus musculus synovial sarcoma, X breakpoint 2 interacting protein (Ssx2ip), mRNA [NM_138744]                          | -0.64                | 0.000   | 0.006           | -0.54                 | 0.000   | 0.095           |

Online Supplemental Table IV: mG4H-STZ and Con-STZ Both

| Gene Symbol                      | RefSeq                    | Description                                                                                                                     | logFC<br>Con-<br>STZ | P-value | Adj.<br>P-value | logFC<br>mG4H-<br>STZ | P-value | Adj.<br>P-value |
|----------------------------------|---------------------------|---------------------------------------------------------------------------------------------------------------------------------|----------------------|---------|-----------------|-----------------------|---------|-----------------|
| <b>Tmc7</b>                      | NM_172476                 | ref Mus musculus transmembrane channel-like gene family 7 (Tmc7), mRNA [NM_172476]                                              | -0.66                | 0.000   | 0.006           | -0.39                 | 0.035   | 0.494           |
| <b>Cryba4</b>                    | ENSMUST00000112385        | ens crystallin, beta A4 Gene [Source:MGI (curated);Acc:MGI:102716] [ENSMUST00000112385]                                         | -1.19                | 0.000   | 0.006           | -0.99                 | 0.006   | 0.369           |
| <b>Pla2g5</b>                    | NM_001122954              | ref Mus musculus phospholipase A2, group V (Pla2g5), transcript variant 1, mRNA [NM_001122954]                                  | -0.94                | 0.000   | 0.007           | -0.55                 | 0.001   | 0.205           |
| <b>D830015G02Rik</b>             | NR_033497                 | ref Mus musculus RIKEN cDNA D830015G02 gene (D830015G02Rik), non-coding RNA [NR_033497]                                         | -1.23                | 0.000   | 0.007           | -0.90                 | 0.000   | 0.157           |
| <b>chr10:69679644-69682458_F</b> | chr10:69679644-69682458_F | lincRNA:chr10:69679644-69682458 forward strand                                                                                  | -1.05                | 0.000   | 0.007           | -0.73                 | 0.002   | 0.262           |
| <b>Usf2</b>                      | NM_011680                 | ref Mus musculus upstream transcription factor 2 (Usf2), mRNA [NM_011680]                                                       | -0.57                | 0.000   | 0.007           | -0.29                 | 0.006   | 0.369           |
| <b>Cacna1g</b>                   | NM_009783                 | ref Mus musculus calcium channel, voltage-dependent, T type, alpha 1G subunit (Cacna1g), transcript variant 1, mRNA [NM_009783] | -1.33                | 0.000   | 0.007           | -1.26                 | 0.000   | 0.136           |
| <b>Tnnt1</b>                     | NM_011618                 | ref Mus musculus troponin T1, skeletal, slow (Tnnt1), mRNA [NM_011618]                                                          | -0.68                | 0.000   | 0.007           | -0.36                 | 0.014   | 0.418           |
| <b>Rnf208</b>                    | NM_176834                 | ref Mus musculus ring finger protein 208 (Rnf208), mRNA [NM_176834]                                                             | -1.01                | 0.000   | 0.008           | -0.98                 | 0.000   | 0.134           |
| <b>2310015B20Rik</b>             | ENSMUST00000020090        | ens RIKEN cDNA 2310015B20 gene Gene [Source:MGI Symbol;Acc:MGI:1916813] [ENSMUST00000020090]                                    | -1.04                | 0.000   | 0.008           | -0.80                 | 0.006   | 0.369           |
| <b>Slc22a1</b>                   | NM_009202                 | ref Mus musculus solute carrier family 22 (organic cation transporter), member 1 (Slc22a1), mRNA [NM_009202]                    | -1.28                | 0.000   | 0.008           | -1.00                 | 0.000   | 0.160           |
| <b>P2ry1</b>                     | NM_008772                 | ref Mus musculus purinergic receptor P2Y, G-protein coupled 1 (P2ry1), mRNA [NM_008772]                                         | -0.89                | 0.000   | 0.009           | -0.63                 | 0.002   | 0.281           |
| <b>Fam131a</b>                   | NM_133778                 | ref Mus musculus family with sequence similarity 131, member A (Fam131a), mRNA [NM_133778]                                      | -0.70                | 0.000   | 0.009           | -0.50                 | 0.015   | 0.421           |
| <b>Bmp7</b>                      | NM_007557                 | ref Mus musculus bone morphogenetic protein 7 (Bmp7), mRNA [NM_007557]                                                          | -0.74                | 0.000   | 0.010           | -0.48                 | 0.026   | 0.470           |
| <b>Mvk</b>                       | NM_023556                 | ref Mus musculus mevalonate kinase (Mvk), mRNA [NM_023556]                                                                      | -0.57                | 0.000   | 0.010           | -0.55                 | 0.001   | 0.183           |
| <b>chr10:69679644-69682458_F</b> | chr10:69679644-69682458_F | lincRNA:chr10:69679644-69682458 forward strand                                                                                  | -0.99                | 0.000   | 0.010           | -0.83                 | 0.006   | 0.369           |

| Online Supplemental Table IV: mG4H-STZ and Con-STZ Both |                           |                                                                                                               |                      |         |                 |                       |         |                 |
|---------------------------------------------------------|---------------------------|---------------------------------------------------------------------------------------------------------------|----------------------|---------|-----------------|-----------------------|---------|-----------------|
| Gene Symbol                                             | RefSeq                    | Description                                                                                                   | logFC<br>Con-<br>STZ | P-value | Adj.<br>P-value | logFC<br>mG4H-<br>STZ | P-value | Adj.<br>P-value |
| Padi2                                                   | NM_008812                 | ref Mus musculus peptidyl arginine deiminase, type II (Padi2), mRNA [NM_008812]                               | -1.41                | 0.000   | 0.010           | -1.43                 | 0.001   | 0.210           |
| Crybb1                                                  | NM_023695                 | ref Mus musculus crystallin, beta B1 (Crybb1), mRNA [NM_023695]                                               | -1.06                | 0.000   | 0.010           | -0.67                 | 0.007   | 0.374           |
| chr10:69669025-69686275_F                               | chr10:69669025-69686275_F | lincRNA:chr10:69669025-69686275 forward strand                                                                | -0.91                | 0.000   | 0.010           | -0.69                 | 0.003   | 0.281           |
| Ypel2                                                   | NM_001005341              | ref Mus musculus yippee-like 2 (Drosophila) (Ypel2), mRNA [NM_001005341]                                      | -0.57                | 0.000   | 0.011           | -0.40                 | 0.023   | 0.453           |
| Slc36a2                                                 | NM_153170                 | ref Mus musculus solute carrier family 36 (proton/amino acid symporter), member 2 (Slc36a2), mRNA [NM_153170] | -0.82                | 0.000   | 0.011           | -0.73                 | 0.002   | 0.258           |
| Higd1a                                                  | NM_019814                 | ref Mus musculus HIG1 domain family, member 1A (Higd1a), mRNA [NM_019814]                                     | -0.62                | 0.000   | 0.012           | -0.48                 | 0.001   | 0.210           |
| Crybb1                                                  | NM_023695                 | ref Mus musculus crystallin, beta B1 (Crybb1), mRNA [NM_023695]                                               | -1.11                | 0.000   | 0.012           | -0.93                 | 0.002   | 0.281           |
| chr10:69669025-69686275_F                               | chr10:69669025-69686275_F | lincRNA:chr10:69669025-69686275 forward strand                                                                | -0.94                | 0.000   | 0.012           | -0.70                 | 0.006   | 0.369           |
| Metrn                                                   | NM_133719                 | ref Mus musculus meteorin, glial cell differentiation regulator (Metrn), mRNA [NM_133719]                     | -1.00                | 0.000   | 0.012           | -0.81                 | 0.002   | 0.281           |
| chr10:69669025-69686275_F                               | chr10:69669025-69686275_F | lincRNA:chr10:69669025-69686275 forward strand                                                                | -0.98                | 0.000   | 0.012           | -0.81                 | 0.001   | 0.231           |
| chr10:39666719-39679959_R                               | chr10:39666719-39679959_R | lincRNA:chr10:39666719-39679959 reverse strand                                                                | -0.65                | 0.000   | 0.012           | -0.95                 | 0.012   | 0.408           |
| Htra1                                                   | NM_019564                 | ref Mus musculus HtrA serine peptidase 1 (Htra1), mRNA [NM_019564]                                            | -0.61                | 0.000   | 0.012           | -0.44                 | 0.004   | 0.318           |
| A930005I04Rik                                           | NM_207277                 | ref Mus musculus RIKEN cDNA A930005I04 gene (A930005I04Rik), mRNA [NM_207277]                                 | -1.12                | 0.000   | 0.012           | -0.98                 | 0.000   | 0.156           |
| Tceal5                                                  | NM_177919                 | ref Mus musculus transcription elongation factor A (SII)-like 5 (Tceal5), mRNA [NM_177919]                    | -0.67                | 0.000   | 0.012           | -0.54                 | 0.009   | 0.399           |
| Cdkn1c                                                  | NM_009876                 | ref Mus musculus cyclin-dependent kinase inhibitor 1C (P57) (Cdkn1c), transcript variant 2, mRNA [NM_009876]  | -0.88                | 0.000   | 0.012           | -0.61                 | 0.000   | 0.136           |
| Gamt                                                    | NM_010255                 | ref Mus musculus guanidinoacetate methyltransferase (Gamt), mRNA [NM_010255]                                  | -0.94                | 0.000   | 0.013           | -1.01                 | 0.009   | 0.398           |

Online Supplemental Table IV: mG4H-STZ and Con-STZ Both

| Gene Symbol   | RefSeq       | Description                                                                                                                 | logFC<br>Con-<br>STZ | P-value | Adj.<br>P-value | logFC<br>mG4H-<br>STZ | P-value | Adj.<br>P-value |
|---------------|--------------|-----------------------------------------------------------------------------------------------------------------------------|----------------------|---------|-----------------|-----------------------|---------|-----------------|
| Pik3r4        | NM_001081309 | ref  Mus musculus phosphatidylinositol 3 kinase, regulatory subunit, polypeptide 4, p150 (Pik3r4), mRNA [NM_001081309]      | -0.45                | 0.000   | 0.013           | -0.43                 | 0.001   | 0.248           |
| AW555464      | NM_001024602 | ref  Mus musculus expressed sequence AW555464 (AW555464), mRNA [NM_001024602]                                               | -0.50                | 0.000   | 0.014           | -0.21                 | 0.033   | 0.487           |
| Endog         | NM_007931    | ref  Mus musculus endonuclease G (Endog), nuclear gene encoding mitochondrial protein, mRNA [NM_007931]                     | -0.57                | 0.000   | 0.015           | -0.42                 | 0.007   | 0.377           |
| Ttll1         | NM_178869    | ref  Mus musculus tubulin tyrosine ligase-like 1 (Ttll1), mRNA [NM_178869]                                                  | -0.89                | 0.000   | 0.015           | -0.66                 | 0.002   | 0.258           |
| Rab40b        | NM_139147    | ref  Mus musculus Rab40b, member RAS oncogene family (Rab40b), mRNA [NM_139147]                                             | -0.58                | 0.000   | 0.015           | -0.57                 | 0.000   | 0.134           |
| Mterfd3       | NM_028832    | ref  Mus musculus MTERF domain containing 3 (Mterfd3), mRNA [NM_028832]                                                     | -0.66                | 0.000   | 0.015           | -0.63                 | 0.002   | 0.281           |
| Gzmm          | NM_008504    | ref  Mus musculus granzyme M (lymphocyte met-ase 1) (Gzmm), mRNA [NM_008504]                                                | -0.57                | 0.000   | 0.015           | -0.45                 | 0.011   | 0.407           |
| 2900008C10Rik | XM_001477165 | ref  PREDICTED: Mus musculus RIKEN cDNA 2900008C10 gene (2900008C10Rik), mRNA [XM_001477165]                                | -0.79                | 0.000   | 0.016           | -0.66                 | 0.001   | 0.248           |
| Msrb2         | NM_029619    | ref  Mus musculus methionine sulfoxide reductase B2 (Msrb2), mRNA [NM_029619]                                               | -0.55                | 0.000   | 0.016           | -0.37                 | 0.011   | 0.406           |
| Ifitm7        | NM_028968    | ref  Mus musculus interferon induced transmembrane protein 7 (Ifitm7), mRNA [NM_028968]                                     | -0.47                | 0.000   | 0.017           | -0.23                 | 0.035   | 0.494           |
| Hist1h4i      | NM_175656    | ref  Mus musculus histone cluster 1, H4i (Hist1h4i), mRNA [NM_175656]                                                       | -0.51                | 0.000   | 0.017           | -0.37                 | 0.018   | 0.435           |
| Plekhg3       | NM_153804    | ref  Mus musculus pleckstrin homology domain containing, family G (with RhoGef domain) member 3 (Plekhg3), mRNA [NM_153804] | -0.43                | 0.000   | 0.017           | -0.19                 | 0.049   | 0.519           |
| Creb5         | NM_172728    | ref  Mus musculus cAMP responsive element binding protein 5 (Creb5), mRNA [NM_172728]                                       | -0.53                | 0.000   | 0.017           | -0.29                 | 0.015   | 0.418           |
| Ephb3         | NM_010143    | ref  Mus musculus Eph receptor B3 (Ephb3), mRNA [NM_010143]                                                                 | -0.49                | 0.000   | 0.019           | -0.33                 | 0.011   | 0.406           |

| Online Supplemental Table IV: mG4H-STZ and Con-STZ Both |                            |                                                                                                                              |                      |         |                 |                       |         |                 |
|---------------------------------------------------------|----------------------------|------------------------------------------------------------------------------------------------------------------------------|----------------------|---------|-----------------|-----------------------|---------|-----------------|
| Gene Symbol                                             | RefSeq                     | Description                                                                                                                  | logFC<br>Con-<br>STZ | P-value | Adj.<br>P-value | logFC<br>mG4H-<br>STZ | P-value | Adj.<br>P-value |
| <b>ENSMUST0000068438</b>                                | ENSMUST0000068438          | ens RIKEN cDNA 4931431C16 gene Gene [Source:MGI Symbol;Acc:MGI:1921614] [ENSMUST0000068438]                                  | -0.76                | 0.000   | 0.019           | -0.94                 | 0.005   | 0.355           |
| <b>ENSMUST00000102977</b>                               | ENSMUST00000102977         | ens histone cluster 1, H4i Gene [Source:MGI (curated);Acc:MGI:2448432] [ENSMUST00000102977]                                  | -0.59                | 0.000   | 0.019           | -0.55                 | 0.010   | 0.404           |
| <b>BC057022</b>                                         | NM_001004180               | ref Mus musculus cDNA sequence BC057022 (BC057022), mRNA [NM_001004180]                                                      | -1.15                | 0.000   | 0.019           | -0.90                 | 0.013   | 0.412           |
| <b>chr4:119963954-119976499_F</b>                       | chr4:119963954-119976499_F | lincRNA:chr4:119963954-119976499 forward strand                                                                              | -0.78                | 0.000   | 0.020           | -0.77                 | 0.000   | 0.101           |
| <b>Amigo3</b>                                           | NM_177275                  | ref Mus musculus adhesion molecule with Ig like domain 3 (Amigo3), mRNA [NM_177275]                                          | -1.14                | 0.000   | 0.020           | -0.99                 | 0.005   | 0.349           |
| <b>Mdga1</b>                                            | NM_001081160               | ref Mus musculus MAM domain containing glycosylphosphatidylinositol anchor 1 (Mdga1), mRNA [NM_001081160]                    | -1.26                | 0.000   | 0.021           | -0.92                 | 0.005   | 0.354           |
| <b>Madd</b>                                             | NM_001177720               | ref Mus musculus MAP-kinase activating death domain (Madd), transcript variant 11, mRNA [NM_001177720]                       | -0.45                | 0.000   | 0.021           | -0.24                 | 0.038   | 0.499           |
| <b>Gp9</b>                                              | NM_018762                  | ref Mus musculus glycoprotein 9 (platelet) (Gp9), mRNA [NM_018762]                                                           | -0.85                | 0.000   | 0.021           | -0.68                 | 0.026   | 0.471           |
| <b>Zfp428</b>                                           | NM_146183                  | ref Mus musculus zinc finger protein 428 (Zfp428), mRNA [NM_146183]                                                          | -0.62                | 0.000   | 0.021           | -0.47                 | 0.000   | 0.136           |
| <b>Paqr4</b>                                            | NM_023824                  | ref Mus musculus progesterone and adipoQ receptor family member IV (Paqr4), mRNA [NM_023824]                                 | -0.62                | 0.000   | 0.021           | -0.72                 | 0.004   | 0.316           |
| <b>2610528E23Rik</b>                                    | NM_025599                  | ref Mus musculus RIKEN cDNA 2610528E23 gene (2610528E23Rik), mRNA [NM_025599]                                                | -0.62                | 0.000   | 0.021           | -0.36                 | 0.010   | 0.400           |
| <b>Morn4</b>                                            | NM_198108                  | ref Mus musculus MORN repeat containing 4 (Morn4), mRNA [NM_198108]                                                          | -0.59                | 0.000   | 0.022           | -0.69                 | 0.001   | 0.248           |
| <b>Cep55</b>                                            | NM_028760                  | ref Mus musculus centrosomal protein 55 (Cep55), transcript variant 2, mRNA [NM_028760]                                      | -0.53                | 0.000   | 0.023           | -0.42                 | 0.001   | 0.196           |
| <b>Mal</b>                                              | NM_010762                  | ref Mus musculus myelin and lymphocyte protein, T-cell differentiation protein (Mal), transcript variant 1, mRNA [NM_010762] | -0.58                | 0.000   | 0.023           | -0.43                 | 0.005   | 0.354           |
| <b>H2-Ob</b>                                            | NM_010389                  | ref Mus musculus histocompatibility 2, O region beta locus (H2-Ob), mRNA [NM_010389]                                         | -1.07                | 0.000   | 0.023           | -0.67                 | 0.014   | 0.414           |

| Online Supplemental Table IV: mG4H-STZ and Con-STZ Both |                            |                                                                                                                                                       |                      |         |                 |                       |         |                 |
|---------------------------------------------------------|----------------------------|-------------------------------------------------------------------------------------------------------------------------------------------------------|----------------------|---------|-----------------|-----------------------|---------|-----------------|
| Gene Symbol                                             | RefSeq                     | Description                                                                                                                                           | logFC<br>Con-<br>STZ | P-value | Adj.<br>P-value | logFC<br>mG4H-<br>STZ | P-value | Adj.<br>P-value |
| Fam54a                                                  | NM_027930                  | ref Mus musculus family with sequence similarity 54, member A (Fam54a), mRNA [NM_027930]                                                              | -0.44                | 0.000   | 0.024           | -0.21                 | 0.044   | 0.512           |
| F730047E07Rik                                           | NM_199467                  | ref Mus musculus RIKEN cDNA F730047E07 gene (F730047E07Rik), mRNA [NM_199467]                                                                         | -0.41                | 0.000   | 0.024           | -0.24                 | 0.027   | 0.473           |
| Acs16                                                   | NM_001033599               | ref Mus musculus acyl-CoA synthetase long-chain family member 6 (Acs16), transcript variant 4, mRNA [NM_001033599]                                    | -0.91                | 0.000   | 0.024           | -0.77                 | 0.000   | 0.117           |
| 5830408B19Rik                                           | AK017909                   | gb Mus musculus adult male thymus cDNA, RIKEN full-length enriched library, clone:5830408B19 product:unclassifiable, full insert sequence. [AK017909] | -0.65                | 0.000   | 0.024           | -0.64                 | 0.006   | 0.356           |
| Eya1                                                    | NM_010164                  | ref Mus musculus eyes absent 1 homolog (Drosophila) (Eya1), mRNA [NM_010164]                                                                          | -0.43                | 0.000   | 0.024           | -0.26                 | 0.023   | 0.456           |
| Gm12501                                                 | XR_032348                  | ref PREDICTED: Mus musculus similar to Siva1 protein (LOC668686), misc RNA [XR_032348]                                                                | -0.49                | 0.000   | 0.024           | -0.54                 | 0.000   | 0.157           |
| chr5:120269342-120279542_R                              | chr5:120269342-120279542_R | lincRNA:chr5:120269342-120279542 reverse strand                                                                                                       | -0.53                | 0.000   | 0.025           | -0.51                 | 0.017   | 0.435           |
| Gm8572                                                  | XR_033692                  | ref PREDICTED: Mus musculus similar to Ran-interacting protein MOG1 (LOC667317), misc RNA [XR_033692]                                                 | -0.49                | 0.000   | 0.025           | -0.44                 | 0.000   | 0.157           |
| ENSMUST00000100627                                      | ENSMUST00000100627         | ens tripartite motif-containing 25 Gene [Source:MGI (curated);Acc:MGI:102749] [ENSMUST00000100627]                                                    | -0.44                | 0.000   | 0.025           | -0.22                 | 0.037   | 0.498           |
| Tspan33                                                 | NM_146173                  | ref Mus musculus tetraspanin 33 (Tspan33), mRNA [NM_146173]                                                                                           | -0.78                | 0.000   | 0.025           | -0.47                 | 0.034   | 0.491           |
| Ghr                                                     | NM_010284                  | ref Mus musculus growth hormone receptor (Ghr), transcript variant 1, mRNA [NM_010284]                                                                | -0.52                | 0.000   | 0.026           | -0.26                 | 0.010   | 0.403           |
| Wif1                                                    | NM_011915                  | ref Mus musculus Wnt inhibitory factor 1 (Wif1), mRNA [NM_011915]                                                                                     | -1.25                | 0.000   | 0.027           | -1.01                 | 0.002   | 0.257           |
| Tmprss13                                                | NM_001013373               | ref Mus musculus transmembrane protease, serine 13 (Tmprss13), mRNA [NM_001013373]                                                                    | -1.37                | 0.000   | 0.027           | -1.25                 | 0.003   | 0.281           |
| Gamt                                                    | NM_010255                  | ref Mus musculus guanidinoacetate methyltransferase (Gamt), mRNA [NM_010255]                                                                          | -0.98                | 0.000   | 0.027           | -1.00                 | 0.010   | 0.403           |
| Sh2d4a                                                  | NM_028182                  | ref Mus musculus SH2 domain containing 4A (Sh2d4a), mRNA [NM_028182]                                                                                  | -1.27                | 0.000   | 0.027           | -0.81                 | 0.004   | 0.323           |



| Online Supplemental Table IV: mG4H-STZ and Con-STZ Both |                           |                                                                                                                                                                 |                      |         |                 |                       |         |                 |
|---------------------------------------------------------|---------------------------|-----------------------------------------------------------------------------------------------------------------------------------------------------------------|----------------------|---------|-----------------|-----------------------|---------|-----------------|
| Gene Symbol                                             | RefSeq                    | Description                                                                                                                                                     | logFC<br>Con-<br>STZ | P-value | Adj.<br>P-value | logFC<br>mG4H-<br>STZ | P-value | Adj.<br>P-value |
| <b>Osbpl6</b>                                           | NM_145525                 | ref Mus musculus oxysterol binding protein-like 6 (Osbpl6), mRNA [NM_145525]                                                                                    | -1.05                | 0.000   | 0.027           | -0.91                 | 0.002   | 0.262           |
| <b>Tmem56</b>                                           | NM_178936                 | ref Mus musculus transmembrane protein 56 (Tmem56), mRNA [NM_178936]                                                                                            | -0.89                | 0.000   | 0.028           | -0.59                 | 0.002   | 0.272           |
| <b>Itsn1</b>                                            | NM_010587                 | ref Mus musculus intersectin 1 (SH3 domain protein 1A) (Itsn1), transcript variant 1, mRNA [NM_010587]                                                          | -0.52                | 0.000   | 0.028           | -0.27                 | 0.028   | 0.474           |
| <b>Fndc5</b>                                            | NM_027402                 | ref Mus musculus fibronectin type III domain containing 5 (Fndc5), mRNA [NM_027402]                                                                             | -0.58                | 0.000   | 0.028           | -0.44                 | 0.009   | 0.398           |
| <b>Reep5</b>                                            | NM_007874                 | ref Mus musculus receptor accessory protein 5 (Reep5), mRNA [NM_007874]                                                                                         | -0.58                | 0.000   | 0.028           | -0.42                 | 0.005   | 0.353           |
| <b>Cyp2u1</b>                                           | ENSMUST00000106337        | ens cytochrome P450, family 2, subfamily u, polypeptide 1 Gene [Source:MGI Symbol;Acc:MGI:1918769] [ENSMUST00000106337]                                         | -0.50                | 0.000   | 0.028           | -0.26                 | 0.032   | 0.484           |
| <b>chr9:58301467-58323783_R</b>                         | chr9:58301467-58323783_R  | lincRNA:chr9:58301467-58323783 reverse strand                                                                                                                   | -0.80                | 0.000   | 0.028           | -0.60                 | 0.033   | 0.490           |
| <b>Sema4c</b>                                           | NM_001126047              | ref Mus musculus sema domain, immunoglobulin domain (Ig), transmembrane domain (TM) and short cytoplasmic domain, (semaphorin) 4C (Sema4c), mRNA [NM_001126047] | -0.51                | 0.000   | 0.029           | -0.25                 | 0.025   | 0.464           |
| <b>Tha1</b>                                             | NM_027919                 | ref Mus musculus threonine aldolase 1 (Tha1), mRNA [NM_027919]                                                                                                  | -0.69                | 0.000   | 0.029           | -0.65                 | 0.002   | 0.258           |
| <b>chr10:69669025-69686275_F</b>                        | chr10:69669025-69686275_F | lincRNA:chr10:69669025-69686275 forward strand                                                                                                                  | -1.12                | 0.000   | 0.029           | -0.68                 | 0.008   | 0.392           |
| <b>Eno3</b>                                             | NM_001136062              | ref Mus musculus enolase 3, beta muscle (Eno3), transcript variant 2, mRNA [NM_001136062]                                                                       | -0.45                | 0.000   | 0.029           | -0.34                 | 0.006   | 0.365           |
| <b>Gm3255</b>                                           | XM_001476107              | ref PREDICTED: Mus musculus similar to VIG (Drosophila Vasa Intronic Gene) ortholog family member (vig-1) (LOC100041289), mRNA [XM_001476107]                   | -0.48                | 0.000   | 0.029           | -0.22                 | 0.046   | 0.513           |
| <b>Sp110</b>                                            | NM_175397                 | ref Mus musculus Sp110 nuclear body protein (Sp110), mRNA [NM_175397]                                                                                           | -0.50                | 0.000   | 0.029           | -0.23                 | 0.038   | 0.499           |
| <b>Ckm</b>                                              | NM_007710                 | ref Mus musculus creatine kinase, muscle (Ckm), mRNA [NM_007710]                                                                                                | -0.47                | 0.000   | 0.029           | -0.35                 | 0.003   | 0.303           |

Online Supplemental Table IV: mG4H-STZ and Con-STZ Both

| Gene Symbol          | RefSeq       | Description                                                                                    | logFC<br>Con-<br>STZ | P-value | Adj.<br>P-value | logFC<br>mG4H-<br>STZ | P-value | Adj.<br>P-value |
|----------------------|--------------|------------------------------------------------------------------------------------------------|----------------------|---------|-----------------|-----------------------|---------|-----------------|
| <b>Sfrs12</b>        | NM_172592    | ref Mus musculus splicing factor, arginine/serine-rich 12 (Sfrs12), mRNA [NM_172592]           | -0.39                | 0.000   | 0.030           | -0.20                 | 0.033   | 0.490           |
| <b>Pla2g4e</b>       | NM_177845    | ref Mus musculus phospholipase A2, group IVE (Pla2g4e), mRNA [NM_177845]                       | -1.44                | 0.000   | 0.030           | -0.91                 | 0.000   | 0.136           |
| <b>Hemgn</b>         | NM_053149    | ref Mus musculus hemogen (Hemgn), mRNA [NM_053149]                                             | -0.50                | 0.000   | 0.030           | -0.25                 | 0.031   | 0.482           |
| <b>Gm3380</b>        | XM_001476937 | ref PREDICTED: Mus musculus similar to ribonuclease T2 (LOC100041510), mRNA [XM_001476937]     | -0.62                | 0.000   | 0.030           | -0.51                 | 0.012   | 0.408           |
| <b>Gm8219</b>        | XR_033111    | ref PREDICTED: Mus musculus similar to brain protein 44-like (LOC666659), misc RNA [XR_033111] | -0.45                | 0.000   | 0.030           | -0.41                 | 0.001   | 0.184           |
| <b>Pfn2</b>          | NM_019410    | ref Mus musculus profilin 2 (Pfn2), mRNA [NM_019410]                                           | -0.44                | 0.000   | 0.030           | -0.44                 | 0.001   | 0.239           |
| <b>Palm3</b>         | NM_028877    | ref Mus musculus paralemmi 3 (Palm3), mRNA [NM_028877]                                         | -0.49                | 0.000   | 0.030           | -0.42                 | 0.012   | 0.408           |
| <b>Wfdc1</b>         | NM_023395    | ref Mus musculus WAP four-disulfide core domain 1 (Wfdc1), mRNA [NM_023395]                    | -0.59                | 0.000   | 0.031           | -0.55                 | 0.002   | 0.266           |
| <b>Il4i1</b>         | NM_010215    | ref Mus musculus interleukin 4 induced 1 (Il4i1), mRNA [NM_010215]                             | -0.88                | 0.000   | 0.031           | -1.02                 | 0.018   | 0.435           |
| <b>Pcdh12</b>        | NM_017378    | ref Mus musculus protocadherin 12 (Pcdh12), mRNA [NM_017378]                                   | -1.05                | 0.000   | 0.032           | -1.27                 | 0.011   | 0.407           |
| <b>6330403A02Rik</b> | NM_001081227 | ref Mus musculus RIKEN cDNA 6330403A02 gene (6330403A02Rik), mRNA [NM_001081227]               | -0.63                | 0.000   | 0.032           | -0.45                 | 0.049   | 0.519           |
| <b>G630090E17Rik</b> | NM_001173500 | ref Mus musculus RIKEN cDNA G630090E17 gene (G630090E17Rik), mRNA [NM_001173500]               | -0.61                | 0.000   | 0.032           | -0.91                 | 0.005   | 0.352           |
| <b>Gja1</b>          | NM_010288    | ref Mus musculus gap junction protein, alpha 1 (Gja1), mRNA [NM_010288]                        | -0.51                | 0.000   | 0.032           | -0.38                 | 0.003   | 0.288           |
| <b>Gm6748</b>        | XM_899893    | ref PREDICTED: Mus musculus predicted gene, EG627369 (EG627369), mRNA [XM_899893]              | -0.51                | 0.000   | 0.033           | -0.27                 | 0.028   | 0.474           |
| <b>Spata20</b>       | NM_144827    | ref Mus musculus spermatogenesis associated 20 (Spata20), mRNA [NM_144827]                     | -1.11                | 0.000   | 0.033           | -0.72                 | 0.000   | 0.141           |
| <b>Amz2</b>          | NM_025275    | ref Mus musculus archaelysin family metalloproteinase 2 (Amz2), mRNA [NM_025275]               | -0.41                | 0.000   | 0.034           | -0.39                 | 0.002   | 0.281           |

| Online Supplemental Table IV: mG4H-STZ and Con-STZ Both |                             |                                                                                                                         |                      |         |                 |                       |         |                 |
|---------------------------------------------------------|-----------------------------|-------------------------------------------------------------------------------------------------------------------------|----------------------|---------|-----------------|-----------------------|---------|-----------------|
| Gene Symbol                                             | RefSeq                      | Description                                                                                                             | logFC<br>Con-<br>STZ | P-value | Adj.<br>P-value | logFC<br>mG4H-<br>STZ | P-value | Adj.<br>P-value |
| chr11:119250824-119286324_R                             | chr11:119250824-119286324_R | lincRNA:chr11:119250824-119286324 reverse strand                                                                        | -0.54                | 0.000   | 0.034           | -0.61                 | 0.000   | 0.143           |
| chr10:62267317-62269871_R                               | chr10:62267317-62269871_R   | lincRNA:chr10:62267317-62269871 reverse strand                                                                          | -1.46                | 0.000   | 0.034           | -1.34                 | 0.006   | 0.361           |
| Auts2                                                   | NM_177047                   | ref Mus musculus autism susceptibility candidate 2 (Auts2), mRNA [NM_177047]                                            | -0.58                | 0.000   | 0.034           | -0.41                 | 0.006   | 0.369           |
| Trem1                                                   | NM_027763                   | ref Mus musculus triggering receptor expressed on myeloid cells-like 1 (Trem1), mRNA [NM_027763]                        | -0.64                | 0.000   | 0.035           | -0.62                 | 0.003   | 0.281           |
| Suv39h2                                                 | NM_022724                   | ref Mus musculus suppressor of variegation 3-9 homolog 2 (Drosophila) (Suv39h2), transcript variant 1, mRNA [NM_022724] | -0.58                | 0.000   | 0.035           | -0.23                 | 0.043   | 0.511           |
| 1110021J02Rik                                           | NM_026782                   | ref Mus musculus RIKEN cDNA 1110021J02 gene (1110021J02Rik), transcript variant 2, mRNA [NM_026782]                     | -0.45                | 0.000   | 0.035           | -0.45                 | 0.002   | 0.278           |
| Zcchc9                                                  | NM_145453                   | ref Mus musculus zinc finger, CCHC domain containing 9 (Zcchc9), mRNA [NM_145453]                                       | -0.48                | 0.000   | 0.036           | -0.25                 | 0.039   | 0.501           |
| Spag7                                                   | NM_172561                   | ref Mus musculus sperm associated antigen 7 (Spag7), transcript variant 1, mRNA [NM_172561]                             | -0.53                | 0.000   | 0.036           | -0.26                 | 0.027   | 0.472           |
| Btbd11                                                  | NM_028709                   | ref Mus musculus BTB (POZ) domain containing 11 (Btbd11), transcript variant 1, mRNA [NM_028709]                        | -0.52                | 0.000   | 0.036           | -0.43                 | 0.002   | 0.275           |
| Xrcc3                                                   | NM_028875                   | ref Mus musculus X-ray repair complementing defective repair in Chinese hamster cells 3 (Xrcc3), mRNA [NM_028875]       | -1.09                | 0.000   | 0.037           | -0.80                 | 0.001   | 0.204           |
| Hist1h2be                                               | NM_178194                   | ref Mus musculus histone cluster 1, H2be (Hist1h2be), transcript variant 2, mRNA [NM_178194]                            | -0.60                | 0.000   | 0.037           | -0.61                 | 0.025   | 0.466           |
| Gm4516                                                  | XM_001480212                | ref PREDICTED: Mus musculus hypothetical protein LOC100043557 (LOC100043557), mRNA [XM_001480212]                       | -0.45                | 0.000   | 0.038           | -0.23                 | 0.048   | 0.516           |
| chr4:11899775-11931875_F                                | chr4:11899775-11931875_F    | lincRNA:chr4:11899775-11931875 forward strand                                                                           | -0.86                | 0.000   | 0.038           | -0.80                 | 0.001   | 0.198           |
| Rgs6                                                    | NM_015812                   | ref Mus musculus regulator of G-protein signaling 6 (Rgs6), mRNA [NM_015812]                                            | -0.55                | 0.000   | 0.039           | -0.30                 | 0.019   | 0.437           |

| Online Supplemental Table IV: mG4H-STZ and Con-STZ Both |              |                                                                                                                                                |                      |         |                 |                       |         |                 |
|---------------------------------------------------------|--------------|------------------------------------------------------------------------------------------------------------------------------------------------|----------------------|---------|-----------------|-----------------------|---------|-----------------|
| Gene Symbol                                             | RefSeq       | Description                                                                                                                                    | logFC<br>Con-<br>STZ | P-value | Adj.<br>P-value | logFC<br>mG4H-<br>STZ | P-value | Adj.<br>P-value |
| <b>Luc7l2</b>                                           | NM_138680    | ref Mus musculus LUC7-like 2 (S. cerevisiae) (Luc7l2), transcript variant 1, mRNA [NM_138680]                                                  | -0.51                | 0.000   | 0.039           | -0.26                 | 0.029   | 0.477           |
| <b>Nqo2</b>                                             | NM_020282    | ref Mus musculus NAD(P)H dehydrogenase, quinone 2 (Nqo2), transcript variant 1, mRNA [NM_020282]                                               | -0.45                | 0.000   | 0.040           | -0.37                 | 0.010   | 0.400           |
| <b>Intu</b>                                             | NM_175515    | ref Mus musculus intumed planar cell polarity effector homolog (Drosophila) (Intu), mRNA [NM_175515]                                           | -0.52                | 0.000   | 0.040           | -0.38                 | 0.004   | 0.320           |
| <b>Gm12059</b>                                          | XM_001477684 | ref PREDICTED: Mus musculus hypothetical protein LOC100046833 (LOC100046833), mRNA [XM_001477684]                                              | -0.54                | 0.000   | 0.040           | -0.52                 | 0.008   | 0.391           |
| <b>Gbp5</b>                                             | NM_153564    | ref Mus musculus guanylate binding protein 5 (Gbp5), mRNA [NM_153564]                                                                          | -0.51                | 0.000   | 0.040           | -0.53                 | 0.037   | 0.496           |
| <b>Ggct</b>                                             | NM_026637    | ref Mus musculus gamma-glutamyl cyclotransferase (Ggct), mRNA [NM_026637]                                                                      | -0.40                | 0.000   | 0.040           | -0.37                 | 0.026   | 0.471           |
| <b>Abcb6</b>                                            | NM_023732    | ref Mus musculus ATP-binding cassette, sub-family B (MDR/TAP), member 6 (Abcb6), nuclear gene encoding mitochondrial protein, mRNA [NM_023732] | -0.49                | 0.000   | 0.040           | -0.43                 | 0.001   | 0.184           |
| <b>Kcna7</b>                                            | NM_010596    | ref Mus musculus potassium voltage-gated channel, shaker-related subfamily, member 7 (Kcna7), mRNA [NM_010596]                                 | -0.52                | 0.000   | 0.041           | -0.36                 | 0.025   | 0.464           |
| <b>Fkbp4</b>                                            | NM_010219    | ref Mus musculus FK506 binding protein 4 (Fkbp4), mRNA [NM_010219]                                                                             | -0.66                | 0.000   | 0.041           | -0.49                 | 0.038   | 0.498           |
| <b>Tnfaip8</b>                                          | NM_134131    | ref Mus musculus tumor necrosis factor, alpha-induced protein 8 (Tnfaip8), transcript variant 1, mRNA [NM_134131]                              | -0.88                | 0.000   | 0.041           | -0.73                 | 0.000   | 0.109           |
| <b>Nubpl</b>                                            | NM_029760    | ref Mus musculus nucleotide binding protein-like (Nubpl), mRNA [NM_029760]                                                                     | -0.45                | 0.000   | 0.041           | -0.34                 | 0.025   | 0.466           |
| <b>Afap1l1</b>                                          | NM_178928    | ref Mus musculus actin filament associated protein 1-like 1 (Afap1l1), mRNA [NM_178928]                                                        | -0.41                | 0.000   | 0.041           | -0.33                 | 0.010   | 0.406           |
| <b>lfngr2</b>                                           | NM_008338    | ref Mus musculus interferon gamma receptor 2 (lfngr2), mRNA [NM_008338]                                                                        | -0.59                | 0.000   | 0.042           | -0.64                 | 0.008   | 0.391           |
| <b>N28178</b>                                           | NM_172690    | ref Mus musculus expressed sequence N28178 (N28178), mRNA [NM_172690]                                                                          | -0.47                | 0.000   | 0.042           | -0.27                 | 0.026   | 0.470           |

| Online Supplemental Table IV: mG4H-STZ and Con-STZ Both |              |                                                                                                                                                                 |                      |         |                 |                       |         |                 |
|---------------------------------------------------------|--------------|-----------------------------------------------------------------------------------------------------------------------------------------------------------------|----------------------|---------|-----------------|-----------------------|---------|-----------------|
| Gene Symbol                                             | RefSeq       | Description                                                                                                                                                     | logFC<br>Con-<br>STZ | P-value | Adj.<br>P-value | logFC<br>mG4H-<br>STZ | P-value | Adj.<br>P-value |
| Gm2268                                                  | XM_001472995 | ref PREDICTED: Mus musculus hypothetical protein LOC100039496 (LOC100039496), mRNA [XM_001472995]                                                               | -0.56                | 0.000   | 0.042           | -0.43                 | 0.032   | 0.483           |
| Mfap3l                                                  | NM_027756    | ref Mus musculus microfibrillar-associated protein 3-like (Mfap3l), transcript variant 1, mRNA [NM_027756]                                                      | -0.57                | 0.000   | 0.042           | -0.50                 | 0.012   | 0.412           |
| Ift122                                                  | NM_031177    | ref Mus musculus intraflagellar transport 122 homolog (Chlamydomonas) (Ift122), transcript variant 1, mRNA [NM_031177]                                          | -0.67                | 0.000   | 0.042           | -0.65                 | 0.027   | 0.472           |
| Gm166                                                   | NM_001033040 | ref Mus musculus predicted gene 166 (Gm166), mRNA [NM_001033040]                                                                                                | -0.62                | 0.000   | 0.043           | -0.45                 | 0.003   | 0.306           |
| 2410022L05Rik                                           | NM_025556    | ref Mus musculus RIKEN cDNA 2410022L05 gene (2410022L05Rik), mRNA [NM_025556]                                                                                   | -0.53                | 0.000   | 0.043           | -0.54                 | 0.007   | 0.380           |
| Wdr89                                                   | NM_028203    | ref Mus musculus WD repeat domain 89 (Wdr89), mRNA [NM_028203]                                                                                                  | -0.40                | 0.000   | 0.043           | -0.22                 | 0.039   | 0.499           |
| Crhr2                                                   | NM_009953    | ref Mus musculus corticotropin releasing hormone receptor 2 (Crhr2), mRNA [NM_009953]                                                                           | -0.66                | 0.000   | 0.043           | -0.43                 | 0.001   | 0.208           |
| 2310028H24Rik                                           | NM_001159583 | ref Mus musculus RIKEN cDNA 2310028H24 gene (2310028H24Rik), transcript variant 1, mRNA [NM_001159583]                                                          | -0.46                | 0.000   | 0.043           | -0.25                 | 0.035   | 0.495           |
| Neur1a                                                  | NM_021360    | ref Mus musculus neuralized homolog 1A (Drosophila) (Neur1a), transcript variant 1, mRNA [NM_021360]                                                            | -0.54                | 0.000   | 0.044           | -0.36                 | 0.022   | 0.451           |
| Cadm4                                                   | NM_153112    | ref Mus musculus cell adhesion molecule 4 (Cadm4), mRNA [NM_153112]                                                                                             | -0.61                | 0.000   | 0.044           | -0.47                 | 0.001   | 0.227           |
| Tufm                                                    | NM_001163713 | ref Mus musculus Tu translation elongation factor, mitochondrial (Tufm), nuclear gene encoding mitochondrial protein, transcript variant 2, mRNA [NM_001163713] | -0.41                | 0.000   | 0.045           | -0.41                 | 0.004   | 0.320           |
| Il16                                                    | NM_010551    | ref Mus musculus interleukin 16 (Il16), mRNA [NM_010551]                                                                                                        | -0.75                | 0.001   | 0.046           | -0.97                 | 0.006   | 0.356           |
| Gm2595                                                  | XM_001474080 | ref PREDICTED: Mus musculus hypothetical protein LOC100040093 (LOC100040093), mRNA [XM_001474080]                                                               | -0.43                | 0.001   | 0.046           | -0.24                 | 0.044   | 0.513           |

Online Supplemental Table IV: mG4H-STZ and Con-STZ Both

| Gene Symbol               | RefSeq                    | Description                                                                                                                                   | logFC<br>Con-<br>STZ | P-value | Adj.<br>P-value | logFC<br>mG4H-<br>STZ | P-value | Adj.<br>P-value |
|---------------------------|---------------------------|-----------------------------------------------------------------------------------------------------------------------------------------------|----------------------|---------|-----------------|-----------------------|---------|-----------------|
| Gm9790                    | NM_001112668              | ref Mus musculus predicted gene 9790 (Gm9790), mRNA [NM_001112668]                                                                            | -0.46                | 0.001   | 0.046           | -0.36                 | 0.005   | 0.346           |
| chr15:8463685-8494960_R   | chr15:8463685-8494960_R   | lincRNA:chr15:8463685-8494960 reverse strand                                                                                                  | -0.46                | 0.001   | 0.046           | -0.39                 | 0.005   | 0.354           |
| LOC676549                 | XR_033889                 | ref PREDICTED: Mus musculus similar to Siva-2 (LOC676549), misc RNA [XR_033889]                                                               | -0.42                | 0.001   | 0.047           | -0.45                 | 0.004   | 0.323           |
| Sgsh                      | NM_018822                 | ref Mus musculus N-sulfoglucosamine sulfohydrolase (sulfamidase) (Sgsh), mRNA [NM_018822]                                                     | -0.47                | 0.001   | 0.048           | -0.26                 | 0.030   | 0.478           |
| Neur1a                    | NM_021360                 | ref Mus musculus neuralized homolog 1A (Drosophila) (Neur1a), transcript variant 1, mRNA [NM_021360]                                          | -0.54                | 0.001   | 0.049           | -0.42                 | 0.006   | 0.369           |
| Obfc2a                    | NM_028696                 | ref Mus musculus oligonucleotide/oligosaccharide-binding fold containing 2A (Obfc2a), mRNA [NM_028696]                                        | -0.52                | 0.001   | 0.049           | -0.67                 | 0.002   | 0.270           |
| Fam78a                    | NM_175511                 | ref Mus musculus family with sequence similarity 78, member A (Fam78a), mRNA [NM_175511]                                                      | -1.54                | 0.001   | 0.049           | -1.44                 | 0.009   | 0.397           |
| Klk8                      | NM_008940                 | ref Mus musculus kallikrein related-peptidase 8 (Klk8), mRNA [NM_008940]                                                                      | -0.47                | 0.001   | 0.051           | -0.57                 | 0.013   | 0.412           |
| Fam110a                   | NM_028666                 | ref Mus musculus family with sequence similarity 110, member A (Fam110a), transcript variant 1, mRNA [NM_028666]                              | -0.52                | 0.001   | 0.051           | -0.52                 | 0.005   | 0.346           |
| chr10:39666719-39679959_R | chr10:39666719-39679959_R | lincRNA:chr10:39666719-39679959 reverse strand                                                                                                | -0.59                | 0.001   | 0.051           | -0.91                 | 0.013   | 0.412           |
| Tnfaip8                   | NM_134131                 | ref Mus musculus tumor necrosis factor, alpha-induced protein 8 (Tnfaip8), transcript variant 1, mRNA [NM_134131]                             | -0.66                | 0.001   | 0.052           | -0.63                 | 0.000   | 0.117           |
| Nubpl                     | NM_029760                 | ref Mus musculus nucleotide binding protein-like (Nubpl), mRNA [NM_029760]                                                                    | -0.44                | 0.001   | 0.052           | -0.40                 | 0.013   | 0.412           |
| Cars2                     | NM_024248                 | ref Mus musculus cysteinyl-tRNA synthetase 2 (mitochondrial)(putative) (Cars2), nuclear gene encoding mitochondrial protein, mRNA [NM_024248] | -0.41                | 0.001   | 0.052           | -0.45                 | 0.005   | 0.352           |
| Jarid2                    | NM_021878                 | ref Mus musculus jumonji, AT rich interactive domain 2 (Jarid2), mRNA [NM_021878]                                                             | -0.43                | 0.001   | 0.053           | -0.29                 | 0.016   | 0.428           |



| Online Supplemental Table IV: mG4H-STZ and Con-STZ Both |           |                                                                                                                                                              |                      |         |                 |                       |         |                 |
|---------------------------------------------------------|-----------|--------------------------------------------------------------------------------------------------------------------------------------------------------------|----------------------|---------|-----------------|-----------------------|---------|-----------------|
| Gene Symbol                                             | RefSeq    | Description                                                                                                                                                  | logFC<br>Con-<br>STZ | P-value | Adj.<br>P-value | logFC<br>mG4H-<br>STZ | P-value | Adj.<br>P-value |
| <b>Tmem218</b>                                          | NM_025464 | ref  Mus musculus transmembrane protein 218 (Tmem218), mRNA [NM_025464]                                                                                      | -0.43                | 0.001   | 0.053           | -0.30                 | 0.021   | 0.447           |
| <b>Mest</b>                                             | NM_008590 | ref  Mus musculus mesoderm specific transcript (Mest), mRNA [NM_008590]                                                                                      | -0.97                | 0.001   | 0.054           | -1.13                 | 0.024   | 0.458           |
| <b>Fn3k</b>                                             | NM_022014 | ref  Mus musculus fructosamine 3 kinase (Fn3k), transcript variant 1, mRNA [NM_022014]                                                                       | -0.45                | 0.001   | 0.054           | -0.36                 | 0.041   | 0.505           |
| <b>Lrba</b>                                             | NM_030695 | ref  Mus musculus LPS-responsive beige-like anchor (Lrba), transcript variant 1, mRNA [NM_030695]                                                            | -0.36                | 0.001   | 0.054           | -0.35                 | 0.011   | 0.406           |
| <b>Fgfr1op</b>                                          | NM_201230 | ref  Mus musculus Fgfr1 oncogene partner (Fgfr1op), mRNA [NM_201230]                                                                                         | -0.48                | 0.001   | 0.054           | -0.40                 | 0.008   | 0.390           |
| <b>Rnf208</b>                                           | NM_176834 | ref  Mus musculus ring finger protein 208 (Rnf208), mRNA [NM_176834]                                                                                         | -1.09                | 0.001   | 0.054           | -0.94                 | 0.000   | 0.160           |
| <b>Osgepl1</b>                                          | NM_028091 | ref  Mus musculus O-sialoglycoprotein endopeptidase-like 1 (Osgepl1), mRNA [NM_028091]                                                                       | -0.43                | 0.001   | 0.054           | -0.23                 | 0.032   | 0.483           |
| <b>Klra8</b>                                            | NM_010650 | ref  Mus musculus killer cell lectin-like receptor, subfamily A, member 8 (Klra8), transcript variant 2, mRNA [NM_010650]                                    | -1.25                | 0.001   | 0.055           | -1.17                 | 0.002   | 0.278           |
| <b>LOC100045975</b>                                     | XR_032163 | ref  PREDICTED: Mus musculus similar to high mobility group nucleosomal binding domain 2 (LOC100045975), misc RNA [XR_032163]                                | -0.40                | 0.001   | 0.055           | -0.53                 | 0.024   | 0.459           |
| <b>Tmem25</b>                                           | NM_027865 | ref  Mus musculus transmembrane protein 25 (Tmem25), mRNA [NM_027865]                                                                                        | -1.02                | 0.001   | 0.055           | -0.82                 | 0.012   | 0.412           |
| <b>Fitm1</b>                                            | NM_026808 | ref  Mus musculus fat storage-inducing transmembrane protein 1 (Fitm1), mRNA [NM_026808]                                                                     | -0.54                | 0.001   | 0.055           | -0.29                 | 0.012   | 0.411           |
| <b>9330177L23Rik</b>                                    | AK020385  | gb  Mus musculus adult male diencephalon cDNA, RIKEN full-length enriched library, clone:9330177L23 product:unclassifiable, full insert sequence. [AK020385] | -0.54                | 0.001   | 0.056           | -0.34                 | 0.030   | 0.480           |
| <b>Cited4</b>                                           | NM_019563 | ref  Mus musculus Cbp/p300-interacting transactivator, with Glu/Asp-rich carboxy-terminal domain, 4 (Cited4), mRNA [NM_019563]                               | -0.60                | 0.001   | 0.056           | -0.56                 | 0.032   | 0.485           |

Online Supplemental Table IV: mG4H-STZ and Con-STZ Both

| Gene Symbol                      | RefSeq                    | Description                                                                                                                  | logFC<br>Con-<br>STZ | P-value | Adj.<br>P-value | logFC<br>mG4H-<br>STZ | P-value | Adj.<br>P-value |
|----------------------------------|---------------------------|------------------------------------------------------------------------------------------------------------------------------|----------------------|---------|-----------------|-----------------------|---------|-----------------|
| <b>Cdc14b</b>                    | NM_172587                 | ref Mus musculus CDC14 cell division cycle 14 homolog B (S. cerevisiae) (Cdc14b), transcript variant 1, mRNA [NM_172587]     | -0.84                | 0.001   | 0.056           | -0.73                 | 0.003   | 0.281           |
| <b>Gsk3b</b>                     | NM_019827                 | ref Mus musculus glycogen synthase kinase 3 beta (Gsk3b), mRNA [NM_019827]                                                   | -0.43                | 0.001   | 0.057           | -0.35                 | 0.004   | 0.316           |
| <b>Tmem126a</b>                  | NM_025460                 | ref Mus musculus transmembrane protein 126A (Tmem126a), mRNA [NM_025460]                                                     | -0.40                | 0.001   | 0.057           | -0.33                 | 0.009   | 0.398           |
| <b>Sned1</b>                     | ENSMUST00000062202        | ens sushi, nidogen and EGF-like domains 1 Gene [Source:MGI Symbol;Acc:MGI:3045960] [ENSMUST00000062202]                      | -0.45                | 0.001   | 0.058           | -0.30                 | 0.023   | 0.453           |
| <b>Morn4</b>                     | NM_198108                 | ref Mus musculus MORN repeat containing 4 (Morn4), mRNA [NM_198108]                                                          | -0.56                | 0.001   | 0.058           | -0.52                 | 0.015   | 0.418           |
| <b>Ddit4l</b>                    | NM_030143                 | ref Mus musculus DNA-damage-inducible transcript 4-like (Ddit4l), mRNA [NM_030143]                                           | -0.56                | 0.001   | 0.058           | -0.32                 | 0.033   | 0.487           |
| <b>chr10:62267317-62269871_R</b> | chr10:62267317-62269871_R | lincRNA:chr10:62267317-62269871 reverse strand                                                                               | -1.29                | 0.001   | 0.058           | -1.26                 | 0.007   | 0.383           |
| <b>Pm20d1</b>                    | NM_178079                 | ref Mus musculus peptidase M20 domain containing 1 (Pm20d1), mRNA [NM_178079]                                                | -0.41                | 0.001   | 0.058           | -0.27                 | 0.022   | 0.451           |
| <b>Dock5</b>                     | NM_177780                 | ref Mus musculus dedicator of cytokinesis 5 (Dock5), mRNA [NM_177780]                                                        | -0.81                | 0.001   | 0.059           | -0.43                 | 0.014   | 0.414           |
| <b>Mrpl46</b>                    | NM_023331                 | ref Mus musculus mitochondrial ribosomal protein L46 (Mrpl46), nuclear gene encoding mitochondrial protein, mRNA [NM_023331] | -0.40                | 0.001   | 0.059           | -0.33                 | 0.003   | 0.281           |
| <b>Bcs1l</b>                     | NM_025784                 | ref Mus musculus BCS1-like (yeast) (Bcs1l), nuclear gene encoding mitochondrial protein, mRNA [NM_025784]                    | -0.37                | 0.001   | 0.059           | -0.37                 | 0.021   | 0.449           |
| <b>Grhl2</b>                     | NM_026496                 | ref Mus musculus grainyhead-like 2 (Drosophila) (Grhl2), mRNA [NM_026496]                                                    | -0.91                | 0.001   | 0.059           | -0.69                 | 0.006   | 0.369           |
| <b>Dhodh</b>                     | NM_020046                 | ref Mus musculus dihydroorotate dehydrogenase (Dhodh), nuclear gene encoding mitochondrial protein, mRNA [NM_020046]         | -0.46                | 0.001   | 0.059           | -0.33                 | 0.015   | 0.419           |

Online Supplemental Table IV: mG4H-STZ and Con-STZ Both

| Gene Symbol                     | RefSeq                   | Description                                                                                                                                          | logFC<br>Con-<br>STZ | P-value | Adj.<br>P-value | logFC<br>mG4H-<br>STZ | P-value | Adj.<br>P-value |
|---------------------------------|--------------------------|------------------------------------------------------------------------------------------------------------------------------------------------------|----------------------|---------|-----------------|-----------------------|---------|-----------------|
| <b>Cox11</b>                    | NM_199008                | ref Mus musculus COX11 homolog, cytochrome c oxidase assembly protein (yeast) (Cox11), nuclear gene encoding mitochondrial protein, mRNA [NM_199008] | -0.37                | 0.001   | 0.060           | -0.48                 | 0.009   | 0.399           |
| <b>Lysmd4</b>                   | NM_175215                | ref Mus musculus LysM, putative peptidoglycan-binding, domain containing 4 (Lysmd4), mRNA [NM_175215]                                                | -0.47                | 0.001   | 0.060           | -0.38                 | 0.019   | 0.437           |
| <b>LOC100048157</b>             | XM_001479656             | ref PREDICTED: Mus musculus hypothetical protein LOC100048157 (LOC100048157), mRNA [XM_001479656]                                                    | -0.62                | 0.001   | 0.060           | -0.56                 | 0.002   | 0.264           |
| <b>Akr1b10</b>                  | NM_172398                | ref Mus musculus aldo-keto reductase family 1, member B10 (aldose reductase) (Akr1b10), mRNA [NM_172398]                                             | -0.35                | 0.001   | 0.060           | -0.41                 | 0.002   | 0.275           |
| <b>Ajap1</b>                    | NM_001099299             | ref Mus musculus adherens junction associated protein 1 (Ajap1), mRNA [NM_001099299]                                                                 | -0.80                | 0.001   | 0.060           | -0.87                 | 0.002   | 0.257           |
| <b>Dcakd</b>                    | NM_026551                | ref Mus musculus dephospho-CoA kinase domain containing (Dcakd), mRNA [NM_026551]                                                                    | -0.87                | 0.001   | 0.060           | -0.76                 | 0.005   | 0.349           |
| <b>Entpd4</b>                   | NM_026174                | ref Mus musculus ectonucleoside triphosphate diphosphohydrolase 4 (Entpd4), mRNA [NM_026174]                                                         | -0.34                | 0.001   | 0.061           | -0.29                 | 0.012   | 0.410           |
| <b>Rom1</b>                     | NM_009073                | ref Mus musculus rod outer segment membrane protein 1 (Rom1), mRNA [NM_009073]                                                                       | -0.58                | 0.001   | 0.061           | -0.35                 | 0.015   | 0.420           |
| <b>0610009O20Rik</b>            | NM_024179                | ref Mus musculus RIKEN cDNA 0610009O20 gene (0610009O20Rik), mRNA [NM_024179]                                                                        | -0.50                | 0.001   | 0.061           | -0.36                 | 0.027   | 0.471           |
| <b>Sorl1</b>                    | ENSMUST00000060989       | ens sortilin-related receptor, LDLR class A repeats-containing Gene [Source:MGI (curated);Acc:MGI:1202296] [ENSMUST00000060989]                      | -0.42                | 0.001   | 0.061           | -0.30                 | 0.026   | 0.470           |
| <b>As3mt</b>                    | NM_020577                | ref Mus musculus arsenic (+3 oxidation state) methyltransferase (As3mt), mRNA [NM_020577]                                                            | -0.41                | 0.001   | 0.062           | -0.31                 | 0.023   | 0.453           |
| <b>chr1:38886199-38892924_R</b> | chr1:38886199-38892924_R | lincRNA:chr1:38886199-38892924 reverse strand                                                                                                        | -0.49                | 0.001   | 0.063           | -0.35                 | 0.009   | 0.400           |
| <b>Stxbp4</b>                   | NM_011505                | ref Mus musculus syntaxin binding protein 4 (Stxbp4), mRNA [NM_011505]                                                                               | -0.65                | 0.001   | 0.063           | -0.67                 | 0.000   | 0.121           |
| <b>Asb2</b>                     | NM_023049                | ref Mus musculus ankyrin repeat and SOCS box-containing 2 (Asb2), mRNA [NM_023049]                                                                   | -0.42                | 0.001   | 0.063           | -0.34                 | 0.026   | 0.469           |
| <b>Tln2</b>                     | NM_001081242             | ref Mus musculus talin 2 (Tln2), mRNA [NM_001081242]                                                                                                 | -0.36                | 0.001   | 0.063           | -0.31                 | 0.029   | 0.477           |

Online Supplemental Table IV: mG4H-STZ and Con-STZ Both

| Gene Symbol               | RefSeq                    | Description                                                                                           | logFC<br>Con-<br>STZ | P-value | Adj.<br>P-value | logFC<br>mG4H-<br>STZ | P-value | Adj.<br>P-value |
|---------------------------|---------------------------|-------------------------------------------------------------------------------------------------------|----------------------|---------|-----------------|-----------------------|---------|-----------------|
| 6330416G13Rik             | NM_144905                 | ref Mus musculus RIKEN cDNA 6330416G13 gene (6330416G13Rik), mRNA [NM_144905]                         | -0.42                | 0.001   | 0.063           | -0.21                 | 0.038   | 0.499           |
| chr10:62267317-62269871_R | chr10:62267317-62269871_R | lincRNA:chr10:62267317-62269871 reverse strand                                                        | -1.33                | 0.001   | 0.063           | -1.26                 | 0.014   | 0.412           |
| ENSMUST00000120674        | ENSMUST00000120674        | ens myc induced nuclear antigen Gene [Source:MGI (curated);Acc:MGI:1914264] [ENSMUST00000120674]      | -0.77                | 0.001   | 0.063           | -0.61                 | 0.045   | 0.513           |
| ENSMUST00000097419        | ENSMUST00000097419        | ens Fgfr1 oncogene partner Gene [Source:MGI Symbol;Acc:MGI:1922546] [ENSMUST00000097419]              | -0.49                | 0.001   | 0.064           | -0.34                 | 0.023   | 0.454           |
| ENSMUST00000047020        | ENSMUST00000047020        | ens RIKEN cDNA A930016O22 gene Gene [Source:MGI Symbol;Acc:MGI:3605623] [ENSMUST00000047020]          | -0.42                | 0.001   | 0.064           | -0.38                 | 0.014   | 0.414           |
| Lin7b                     | NM_011698                 | ref Mus musculus lin-7 homolog B (C. elegans) (Lin7b), mRNA [NM_011698]                               | -1.02                | 0.001   | 0.065           | -0.74                 | 0.003   | 0.290           |
| Ky                        | NM_024291                 | ref Mus musculus kyphoscoliosis peptidase (Ky), mRNA [NM_024291]                                      | -1.53                | 0.001   | 0.065           | -1.56                 | 0.007   | 0.384           |
| Tmem126b                  | NM_026734                 | ref Mus musculus transmembrane protein 126B (Tmem126b), mRNA [NM_026734]                              | -0.39                | 0.001   | 0.065           | -0.23                 | 0.049   | 0.519           |
| Zcchc10                   | NM_026479                 | ref Mus musculus zinc finger, CCHC domain containing 10 (Zcchc10), mRNA [NM_026479]                   | -0.74                | 0.001   | 0.066           | -0.62                 | 0.030   | 0.477           |
| Ccbl1                     | NM_172404                 | ref Mus musculus cysteine conjugate-beta lyase 1 (Ccbl1), mRNA [NM_172404]                            | -0.39                | 0.001   | 0.067           | -0.32                 | 0.009   | 0.394           |
| Rs1                       | NM_011302                 | ref Mus musculus retinoschisis (X-linked, juvenile) 1 (human) (Rs1), mRNA [NM_011302]                 | -0.66                | 0.001   | 0.067           | -0.54                 | 0.006   | 0.356           |
| 2310061I04Rik             | NM_001033630              | ref Mus musculus RIKEN cDNA 2310061I04 gene (2310061I04Rik), mRNA [NM_001033630]                      | -0.36                | 0.001   | 0.067           | -0.26                 | 0.015   | 0.418           |
| BC017612                  | NM_133214                 | ref Mus musculus cDNA sequence BC017612 (BC017612), mRNA [NM_133214]                                  | -0.65                | 0.001   | 0.068           | -0.73                 | 0.009   | 0.400           |
| Ppbbp                     | NM_023785                 | ref Mus musculus pro-platelet basic protein (Ppbbp), mRNA [NM_023785]                                 | -0.90                | 0.001   | 0.068           | -0.82                 | 0.015   | 0.418           |
| chr10:39666719-39679959_R | chr10:39666719-39679959_R | lincRNA:chr10:39666719-39679959 reverse strand                                                        | -0.59                | 0.001   | 0.068           | -0.85                 | 0.026   | 0.467           |
| Mapk10                    | NM_009158                 | ref Mus musculus mitogen-activated protein kinase 10 (Mapk10), transcript variant 1, mRNA [NM_009158] | -0.45                | 0.001   | 0.068           | -0.30                 | 0.036   | 0.495           |

| Online Supplemental Table IV: mG4H-STZ and Con-STZ Both |              |                                                                                                                                                   |                      |         |                 |                       |         |                 |
|---------------------------------------------------------|--------------|---------------------------------------------------------------------------------------------------------------------------------------------------|----------------------|---------|-----------------|-----------------------|---------|-----------------|
| Gene Symbol                                             | RefSeq       | Description                                                                                                                                       | logFC<br>Con-<br>STZ | P-value | Adj.<br>P-value | logFC<br>mG4H-<br>STZ | P-value | Adj.<br>P-value |
| <b>Oas1d</b>                                            | NM_133893    | ref Mus musculus 2'-5' oligoadenylate synthetase 1D (Oas1d), mRNA [NM_133893]                                                                     | -0.38                | 0.001   | 0.069           | -0.34                 | 0.014   | 0.414           |
| <b>Synpo2</b>                                           | NM_080451    | ref Mus musculus synaptopodin 2 (Synpo2), mRNA [NM_080451]                                                                                        | -0.41                | 0.001   | 0.070           | -0.35                 | 0.010   | 0.403           |
| <b>LOC100047308</b>                                     | XM_001477861 | ref PREDICTED: Mus musculus hypothetical protein LOC100047308 (LOC100047308), mRNA [XM_001477861]                                                 | -0.46                | 0.001   | 0.070           | -0.62                 | 0.002   | 0.272           |
| <b>D630042P16Rik</b>                                    | NM_175525    | ref Mus musculus RIKEN cDNA D630042P16 gene (D630042P16Rik), mRNA [NM_175525]                                                                     | -0.45                | 0.001   | 0.070           | -0.59                 | 0.006   | 0.361           |
| <b>Slamf1</b>                                           | NM_013730    | ref Mus musculus signaling lymphocytic activation molecule family member 1 (Slamf1), mRNA [NM_013730]                                             | -0.55                | 0.001   | 0.070           | -0.39                 | 0.004   | 0.324           |
| <b>Caprin1</b>                                          | NM_016739    | ref Mus musculus cell cycle associated protein 1 (Caprin1), transcript variant 1, mRNA [NM_016739]                                                | -0.47                | 0.001   | 0.070           | -0.52                 | 0.017   | 0.435           |
| <b>Pcnxl2</b>                                           | NM_175561    | ref Mus musculus pecanex-like 2 (Drosophila) (Pcnxl2), transcript variant 2, mRNA [NM_175561]                                                     | -0.80                | 0.001   | 0.071           | -0.59                 | 0.007   | 0.370           |
| <b>Taf9</b>                                             | NM_001015889 | ref Mus musculus TAF9 RNA polymerase II, TATA box binding protein (TBP)-associated factor (Taf9), transcript variant 3, mRNA [NM_001015889]       | -0.33                | 0.001   | 0.071           | -0.28                 | 0.022   | 0.452           |
| <b>LOC100048780</b>                                     | XM_001481225 | ref PREDICTED: Mus musculus similar to MRC OX-2 antigen homolog (LOC100048780), mRNA [XM_001481225]                                               | -0.48                | 0.001   | 0.071           | -0.61                 | 0.021   | 0.448           |
| <b>Letm1</b>                                            | NM_019694    | ref Mus musculus leucine zipper-EF-hand containing transmembrane protein 1 (Letm1), nuclear gene encoding mitochondrial protein, mRNA [NM_019694] | -0.41                | 0.001   | 0.072           | -0.32                 | 0.005   | 0.350           |
| <b>Abhd5</b>                                            | NM_026179    | ref Mus musculus abhydrolase domain containing 5 (Abhd5), mRNA [NM_026179]                                                                        | -0.40                | 0.001   | 0.072           | -0.30                 | 0.006   | 0.369           |
| <b>Ntsr2</b>                                            | NM_008747    | ref Mus musculus neurotensin receptor 2 (Ntsr2), mRNA [NM_008747]                                                                                 | -0.52                | 0.001   | 0.072           | -0.62                 | 0.005   | 0.343           |
| <b>Gm6416</b>                                           | XM_001475967 | ref PREDICTED: Mus musculus hypothetical protein LOC623312 (LOC623312), mRNA [XM_001475967]                                                       | -0.84                | 0.001   | 0.072           | -0.75                 | 0.004   | 0.312           |
| <b>Lca5l</b>                                            | NM_001001492 | ref Mus musculus Leber congenital amaurosis 5-like (Lca5l), mRNA [NM_001001492]                                                                   | -0.53                | 0.001   | 0.073           | -0.36                 | 0.009   | 0.394           |

| Online Supplemental Table IV: mG4H-STZ and Con-STZ Both |                            |                                                                                                                                                            |                      |         |                 |                       |         |                 |
|---------------------------------------------------------|----------------------------|------------------------------------------------------------------------------------------------------------------------------------------------------------|----------------------|---------|-----------------|-----------------------|---------|-----------------|
| Gene Symbol                                             | RefSeq                     | Description                                                                                                                                                | logFC<br>Con-<br>STZ | P-value | Adj.<br>P-value | logFC<br>mG4H-<br>STZ | P-value | Adj.<br>P-value |
| <b>Bcl11b</b>                                           | NM_021399                  | ref Mus musculus B-cell leukemia/lymphoma 11B (Bcl11b), transcript variant 2, mRNA [NM_021399]                                                             | -1.24                | 0.001   | 0.073           | -1.16                 | 0.008   | 0.393           |
| <b>2010007E15Rik</b>                                    | XM_001478752               | ref PREDICTED: Mus musculus RIKEN cDNA 2010007E15 gene (2010007E15Rik), mRNA [XM_001478752]                                                                | -0.57                | 0.001   | 0.073           | -0.67                 | 0.013   | 0.412           |
| <b>Tfb1m</b>                                            | NM_146074                  | ref Mus musculus transcription factor B1, mitochondrial (Tfb1m), nuclear gene encoding mitochondrial protein, mRNA [NM_146074]                             | -0.48                | 0.001   | 0.074           | -0.51                 | 0.025   | 0.466           |
| <b>Pdxk</b>                                             | NM_172134                  | ref Mus musculus pyridoxal (pyridoxine, vitamin B6) kinase (Pdxk), mRNA [NM_172134]                                                                        | -0.39                | 0.001   | 0.074           | -0.27                 | 0.046   | 0.513           |
| <b>Igdcc4</b>                                           | NM_020043                  | ref Mus musculus immunoglobulin superfamily, DCC subclass, member 4 (Igdcc4), mRNA [NM_020043]                                                             | -0.49                | 0.001   | 0.074           | -0.54                 | 0.035   | 0.495           |
| <b>Pdss1</b>                                            | NM_019501                  | ref Mus musculus prenyl (solanesyl) diphosphate synthase, subunit 1 (Pdss1), mRNA [NM_019501]                                                              | -0.54                | 0.001   | 0.076           | -0.41                 | 0.009   | 0.398           |
| <b>A730020M07Rik</b>                                    | XR_035398                  | ref PREDICTED: Mus musculus RIKEN cDNA A730020M07 gene (A730020M07Rik), misc RNA [XR_035398]                                                               | -0.39                | 0.001   | 0.076           | -0.24                 | 0.048   | 0.516           |
| <b>Kcnn2</b>                                            | NM_080465                  | ref Mus musculus potassium intermediate/small conductance calcium-activated channel, subfamily N, member 2 (Kcnn2), mRNA [NM_080465]                       | -1.03                | 0.001   | 0.076           | -0.61                 | 0.007   | 0.377           |
| <b>Gm13675</b>                                          | XR_032818                  | ref PREDICTED: Mus musculus similar to mitochondrial ribosomal protein L18 (LOC433550), misc RNA [XR_032818]                                               | -0.44                | 0.001   | 0.077           | -0.45                 | 0.005   | 0.354           |
| <b>Gm15770</b>                                          | XR_034208                  | ref PREDICTED: Mus musculus similar to mitochondrial ribosomal protein L12 (LOC677204), misc RNA [XR_034208]                                               | -0.36                | 0.001   | 0.077           | -0.28                 | 0.009   | 0.398           |
| <b>Ppil1</b>                                            | NM_026845                  | ref Mus musculus peptidylprolyl isomerase (cyclophilin)-like 1 (Ppil1), mRNA [NM_026845]                                                                   | -0.82                | 0.001   | 0.077           | -0.68                 | 0.002   | 0.279           |
| <b>Gm12337</b>                                          | XR_034801                  | ref PREDICTED: Mus musculus similar to ATP synthase, H <sup>+</sup> transporting, mitochondrial F0 complex, subunit c (LOC100043447), misc RNA [XR_034801] | -0.40                | 0.001   | 0.077           | -0.28                 | 0.013   | 0.412           |
| <b>chr4:132641388-132645061_F</b>                       | chr4:132641388-132645061_F | lincRNA:chr4:132641388-132645061 forward strand                                                                                                            | -0.58                | 0.001   | 0.077           | -0.51                 | 0.004   | 0.318           |



Online Supplemental Table IV: mG4H-STZ and Con-STZ Both

| Gene Symbol   | RefSeq             | Description                                                                                                                                         | logFC<br>Con-<br>STZ | P-value | Adj.<br>P-value | logFC<br>mG4H-<br>STZ | P-value | Adj.<br>P-value |
|---------------|--------------------|-----------------------------------------------------------------------------------------------------------------------------------------------------|----------------------|---------|-----------------|-----------------------|---------|-----------------|
| Recql5        | NM_130454          | ref Mus musculus RecQ protein-like 5 (Recql5), mRNA [NM_130454]                                                                                     | -0.68                | 0.001   | 0.078           | -0.36                 | 0.004   | 0.308           |
| Ano4          | NM_178773          | ref Mus musculus anoctamin 4 (Ano4), mRNA [NM_178773]                                                                                               | -1.22                | 0.001   | 0.078           | -1.07                 | 0.000   | 0.090           |
| Oscp1         | NM_172701          | ref Mus musculus organic solute carrier partner 1 (Oscp1), mRNA [NM_172701]                                                                         | -0.45                | 0.001   | 0.079           | -0.39                 | 0.001   | 0.227           |
| Obsl1         | NM_178884          | ref Mus musculus obscurin-like 1 (Obsl1), mRNA [NM_178884]                                                                                          | -0.32                | 0.001   | 0.080           | -0.26                 | 0.041   | 0.505           |
| Triap1        | NM_026933          | ref Mus musculus TP53 regulated inhibitor of apoptosis 1 (Triap1), mRNA [NM_026933]                                                                 | -0.36                | 0.001   | 0.080           | -0.26                 | 0.022   | 0.452           |
| A2bp1         | NM_021477          | ref Mus musculus ataxin 2 binding protein 1 (A2bp1), transcript variant 2, mRNA [NM_021477]                                                         | -0.66                | 0.001   | 0.080           | -0.41                 | 0.042   | 0.508           |
| Eepd1         | NM_026189          | ref Mus musculus endonuclease/exonuclease/phosphatase family domain containing 1 (Eepd1), mRNA [NM_026189]                                          | -1.07                | 0.001   | 0.080           | -0.65                 | 0.017   | 0.430           |
| Med29         | NM_026042          | ref Mus musculus mediator complex subunit 29 (Med29), mRNA [NM_026042]                                                                              | -0.37                | 0.001   | 0.080           | -0.34                 | 0.012   | 0.410           |
| Fam19a3       | NM_183224          | ref Mus musculus family with sequence similarity 19, member A3 (Fam19a3), mRNA [NM_183224]                                                          | -0.95                | 0.002   | 0.081           | -1.01                 | 0.016   | 0.426           |
| E030010N08Rik | ENSMUST00000138595 | ref PREDICTED: Mus musculus RIKEN cDNA E030010N08 gene (E030010N08Rik), mRNA [XM_001474855]                                                         | -0.85                | 0.002   | 0.081           | -0.60                 | 0.013   | 0.412           |
| Thyn1         | NM_144543          | ref Mus musculus thymocyte nuclear protein 1 (Thyn1), mRNA [NM_144543]                                                                              | -0.38                | 0.002   | 0.081           | -0.41                 | 0.012   | 0.410           |
| Alkbh7        | NM_025538          | ref Mus musculus alkB, alkylation repair homolog 7 (E. coli) (Alkbh7), mRNA [NM_025538]                                                             | -0.50                | 0.002   | 0.082           | -0.44                 | 0.003   | 0.290           |
| Ssbp1         | NM_212468          | ref Mus musculus single-stranded DNA binding protein 1 (Ssbp1), nuclear gene encoding mitochondrial protein, transcript variant 1, mRNA [NM_212468] | -0.36                | 0.002   | 0.083           | -0.35                 | 0.021   | 0.447           |
| Plxnd1        | NM_026376          | ref Mus musculus plexin D1 (Plxnd1), mRNA [NM_026376]                                                                                               | -0.69                | 0.002   | 0.084           | -0.54                 | 0.011   | 0.406           |
| Gpr88         | NM_022427          | ref Mus musculus G-protein coupled receptor 88 (Gpr88), mRNA [NM_022427]                                                                            | -0.51                | 0.002   | 0.084           | -0.60                 | 0.002   | 0.281           |

| Online Supplemental Table IV: mG4H-STZ and Con-STZ Both |                           |                                                                                                                                                                  |                      |         |                 |                       |         |                 |
|---------------------------------------------------------|---------------------------|------------------------------------------------------------------------------------------------------------------------------------------------------------------|----------------------|---------|-----------------|-----------------------|---------|-----------------|
| Gene Symbol                                             | RefSeq                    | Description                                                                                                                                                      | logFC<br>Con-<br>STZ | P-value | Adj.<br>P-value | logFC<br>mG4H-<br>STZ | P-value | Adj.<br>P-value |
| <b>ApIn</b>                                             | NM_013912                 | ref Mus musculus apelin (ApIn), mRNA [NM_013912]                                                                                                                 | -1.36                | 0.002   | 0.085           | -1.84                 | 0.008   | 0.391           |
| <b>Enho</b>                                             | NM_027147                 | ref Mus musculus energy homeostasis associated (Enho), mRNA [NM_027147]                                                                                          | -0.41                | 0.002   | 0.085           | -0.51                 | 0.013   | 0.412           |
| <b>Osta</b>                                             | NM_145932                 | ref Mus musculus organic solute transporter alpha (Osta), mRNA [NM_145932]                                                                                       | -0.82                | 0.002   | 0.085           | -0.53                 | 0.013   | 0.412           |
| <b>Nme4</b>                                             | NM_019731                 | ref Mus musculus non-metastatic cells 4, protein expressed in (Nme4), nuclear gene encoding mitochondrial protein, mRNA [NM_019731]                              | -0.50                | 0.002   | 0.085           | -0.77                 | 0.023   | 0.456           |
| <b>BC028528</b>                                         | NM_153513                 | ref Mus musculus cDNA sequence BC028528 (BC028528), mRNA [NM_153513]                                                                                             | -0.63                | 0.002   | 0.085           | -0.63                 | 0.012   | 0.410           |
| <b>chr17:24157887-24158104_R</b>                        | chr17:24157887-24158104_R | lincRNA:chr17:24157887-24158104 reverse strand                                                                                                                   | -0.70                | 0.002   | 0.085           | -0.64                 | 0.015   | 0.423           |
| <b>Ufsp1</b>                                            | NM_027356                 | ref Mus musculus UFM1-specific peptidase 1 (Ufsp1), mRNA [NM_027356]                                                                                             | -0.35                | 0.002   | 0.085           | -0.42                 | 0.005   | 0.353           |
| <b>C630004L07Rik</b>                                    | AK049864                  | gb Mus musculus adult male hippocampus cDNA, RIKEN full-length enriched library, clone:C630004L07 product:hypothetical protein, full insert sequence. [AK049864] | -0.50                | 0.002   | 0.085           | -0.60                 | 0.002   | 0.279           |
| <b>BC048943</b>                                         | NM_001127685              | ref Mus musculus cDNA sequence BC048943 (BC048943), mRNA [NM_001127685]                                                                                          | -1.03                | 0.002   | 0.086           | -1.10                 | 0.006   | 0.369           |
| <b>ENSMUST00000085998</b>                               | ENSMUST00000085998        | ens zinc finger protein 428 Gene [Source:MGI Symbol;Acc:MGI:1916463] [ENSMUST00000085998]                                                                        | -0.48                | 0.002   | 0.086           | -0.47                 | 0.002   | 0.262           |
| <b>Pmvk</b>                                             | NM_026784                 | ref Mus musculus phosphomevalonate kinase (Pmvk), transcript variant 1, mRNA [NM_026784]                                                                         | -0.34                | 0.002   | 0.086           | -0.28                 | 0.013   | 0.412           |
| <b>Rwdd4a</b>                                           | NM_203507                 | ref Mus musculus RWD domain containing 4A (Rwdd4a), mRNA [NM_203507]                                                                                             | -0.48                | 0.002   | 0.086           | -0.60                 | 0.007   | 0.377           |
| <b>Lactb</b>                                            | NM_030717                 | ref Mus musculus lactamase, beta (Lactb), nuclear gene encoding mitochondrial protein, mRNA [NM_030717]                                                          | -0.36                | 0.002   | 0.086           | -0.35                 | 0.008   | 0.391           |
| <b>2900009J06Rik</b>                                    | AA986756                  | gb uc73h09.x1 Sugano mouse liver mlia Mus musculus cDNA clone IMAGE:1431329 3'. [AA986756]                                                                       | -0.69                | 0.002   | 0.086           | -0.62                 | 0.001   | 0.186           |

Online Supplemental Table IV: mG4H-STZ and Con-STZ Both

| Gene Symbol          | RefSeq       | Description                                                                                                                                                       | logFC<br>Con-<br>STZ | P-value | Adj.<br>P-value | logFC<br>mG4H-<br>STZ | P-value | Adj.<br>P-value |
|----------------------|--------------|-------------------------------------------------------------------------------------------------------------------------------------------------------------------|----------------------|---------|-----------------|-----------------------|---------|-----------------|
| <b>Klra27</b>        | XM_916590    | ref PREDICTED: Mus musculus killer cell lectin-like receptor, subfamily A, member 27 (Klra27), mRNA [XM_916590]                                                   | -0.74                | 0.002   | 0.086           | -0.71                 | 0.006   | 0.366           |
| <b>Ndutf4</b>        | NM_026742    | ref Mus musculus NADH dehydrogenase (ubiquinone) 1 alpha subcomplex, assembly factor 4 (Ndutf4), nuclear gene encoding mitochondrial protein, mRNA [NM_026742]    | -0.52                | 0.002   | 0.086           | -0.35                 | 0.016   | 0.426           |
| <b>Mrpl43</b>        | NM_053164    | ref Mus musculus mitochondrial ribosomal protein L43 (Mrpl43), nuclear gene encoding mitochondrial protein, mRNA [NM_053164]                                      | -0.35                | 0.002   | 0.086           | -0.23                 | 0.048   | 0.516           |
| <b>Tmem41b</b>       | NM_153525    | ref Mus musculus transmembrane protein 41B (Tmem41b), mRNA [NM_153525]                                                                                            | -0.46                | 0.002   | 0.086           | -0.43                 | 0.014   | 0.418           |
| <b>Sept3</b>         | NM_011889    | ref Mus musculus septin 3 (Sept3), mRNA [NM_011889]                                                                                                               | -0.69                | 0.002   | 0.086           | -0.45                 | 0.026   | 0.468           |
| <b>Ntf3</b>          | NM_001164034 | ref Mus musculus neurotrophin 3 (Ntf3), transcript variant 1, mRNA [NM_001164034]                                                                                 | -0.52                | 0.002   | 0.086           | -0.43                 | 0.005   | 0.355           |
| <b>Akr1b10</b>       | NM_172398    | ref Mus musculus aldo-keto reductase family 1, member B10 (aldose reductase) (Akr1b10), mRNA [NM_172398]                                                          | -0.34                | 0.002   | 0.087           | -0.34                 | 0.005   | 0.346           |
| <b>4930455C21Rik</b> | BC002243     | gb Mus musculus RIKEN cDNA 4930455C21 gene, mRNA (cDNA clone MGC:7537 IMAGE:3492342), complete cds. [BC002243]                                                    | -0.38                | 0.002   | 0.087           | -0.27                 | 0.026   | 0.470           |
| <b>Taco1</b>         | NM_027346    | ref Mus musculus translational activator of mitochondrially encoded cytochrome c oxidase I (Taco1), nuclear gene encoding mitochondrial protein, mRNA [NM_027346] | -0.52                | 0.002   | 0.088           | -0.46                 | 0.006   | 0.369           |
| <b>LOC100047915</b>  | XM_001479122 | ref PREDICTED: Mus musculus similar to Memo1 protein (LOC100047915), mRNA [XM_001479122]                                                                          | -0.62                | 0.002   | 0.089           | -0.66                 | 0.005   | 0.355           |
| <b>Mgmt</b>          | NM_008598    | ref Mus musculus O-6-methylguanine-DNA methyltransferase (Mgmt), mRNA [NM_008598]                                                                                 | -0.50                | 0.002   | 0.089           | -0.62                 | 0.008   | 0.391           |
| <b>Nudt1</b>         | NM_008637    | ref Mus musculus nudix (nucleoside diphosphate linked moiety X)-type motif 1 (Nudt1), mRNA [NM_008637]                                                            | -0.43                | 0.002   | 0.089           | -0.47                 | 0.012   | 0.410           |
| <b>Apol10b</b>       | NM_177820    | ref Mus musculus apolipoprotein L 10b (Apol10b), mRNA [NM_177820]                                                                                                 | -1.03                | 0.002   | 0.089           | -0.99                 | 0.024   | 0.459           |

| Online Supplemental Table IV: mG4H-STZ and Con-STZ Both |              |                                                                                                                           |                      |         |                 |                       |         |                 |
|---------------------------------------------------------|--------------|---------------------------------------------------------------------------------------------------------------------------|----------------------|---------|-----------------|-----------------------|---------|-----------------|
| Gene Symbol                                             | RefSeq       | Description                                                                                                               | logFC<br>Con-<br>STZ | P-value | Adj.<br>P-value | logFC<br>mG4H-<br>STZ | P-value | Adj.<br>P-value |
| <b>Foxo6</b>                                            | NM_194060    | ref Mus musculus forkhead box O6 (Foxo6), mRNA [NM_194060]                                                                | -0.59                | 0.002   | 0.089           | -0.57                 | 0.009   | 0.400           |
| <b>Nt5m</b>                                             | NM_134029    | ref Mus musculus 5',3'-nucleotidase, mitochondrial (Nt5m), nuclear gene encoding mitochondrial protein, mRNA [NM_134029]  | -0.33                | 0.002   | 0.090           | -0.22                 | 0.030   | 0.480           |
| <b>Akap5</b>                                            | NM_001101471 | ref Mus musculus A kinase (PRKA) anchor protein 5 (Akap5), mRNA [NM_001101471]                                            | -1.75                | 0.002   | 0.091           | -1.73                 | 0.009   | 0.393           |
| <b>Itgb6</b>                                            | NM_021359    | ref Mus musculus integrin beta 6 (Itgb6), transcript variant 2, mRNA [NM_021359]                                          | -1.95                | 0.002   | 0.091           | -2.01                 | 0.016   | 0.425           |
| <b>Hist1h2bm</b>                                        | NM_178200    | ref Mus musculus histone cluster 1, H2bm (Hist1h2bm), mRNA [NM_178200]                                                    | -0.45                | 0.002   | 0.091           | -0.27                 | 0.019   | 0.440           |
| <b>Leo1</b>                                             | NM_001039522 | ref Mus musculus Leo1, Paf1/RNA polymerase II complex component, homolog (S. cerevisiae) (Leo1), mRNA [NM_001039522]      | -0.38                | 0.002   | 0.091           | -0.36                 | 0.024   | 0.458           |
| <b>LOC677553</b>                                        | XR_005086    | ref PREDICTED: Mus musculus hypothetical LOC677553 (LOC677553), misc RNA [XR_005086]                                      | -0.35                | 0.002   | 0.091           | -0.22                 | 0.036   | 0.495           |
| <b>Rasa4</b>                                            | NM_133914    | ref Mus musculus RAS p21 protein activator 4 (Rasa4), transcript variant 1, mRNA [NM_133914]                              | -0.67                | 0.002   | 0.091           | -0.66                 | 0.001   | 0.202           |
| <b>Gpt</b>                                              | NM_182805    | ref Mus musculus glutamic pyruvic transaminase, soluble (Gpt), mRNA [NM_182805]                                           | -0.69                | 0.002   | 0.091           | -0.74                 | 0.000   | 0.048           |
| <b>Ptcd3</b>                                            | NM_027275    | ref Mus musculus pentatricopeptide repeat domain 3 (Ptcd3), nuclear gene encoding mitochondrial protein, mRNA [NM_027275] | -0.44                | 0.002   | 0.091           | -0.41                 | 0.010   | 0.405           |
| <b>Flad1</b>                                            | NM_177041    | ref Mus musculus RFad1, flavin adenine dinucleotide synthetase, homolog (yeast) (Flad1), mRNA [NM_177041]                 | -0.39                | 0.002   | 0.091           | -0.37                 | 0.007   | 0.370           |
| <b>Tm7sf2</b>                                           | NM_028454    | ref Mus musculus transmembrane 7 superfamily member 2 (Tm7sf2), mRNA [NM_028454]                                          | -0.40                | 0.002   | 0.091           | -0.52                 | 0.001   | 0.202           |
| <b>Dcaf4</b>                                            | NM_030246    | ref Mus musculus DDB1 and CUL4 associated factor 4 (Dcaf4), transcript variant 2, mRNA [NM_030246]                        | -0.55                | 0.002   | 0.091           | -0.59                 | 0.027   | 0.471           |
| <b>Caprin1</b>                                          | NM_001111291 | ref Mus musculus cell cycle associated protein 1 (Caprin1), transcript variant 4, mRNA [NM_001111291]                     | -0.52                | 0.002   | 0.092           | -0.40                 | 0.006   | 0.369           |

| Online Supplemental Table IV: mG4H-STZ and Con-STZ Both |                           |                                                                                                                             |                      |         |                 |                       |         |                 |
|---------------------------------------------------------|---------------------------|-----------------------------------------------------------------------------------------------------------------------------|----------------------|---------|-----------------|-----------------------|---------|-----------------|
| Gene Symbol                                             | RefSeq                    | Description                                                                                                                 | logFC<br>Con-<br>STZ | P-value | Adj.<br>P-value | logFC<br>mG4H-<br>STZ | P-value | Adj.<br>P-value |
| <b>Txn2</b>                                             | NM_019913                 | ref[Mus musculus thioredoxin 2 (Txn2), nuclear gene encoding mitochondrial protein, mRNA [NM_019913]                        | -0.35                | 0.002   | 0.092           | -0.34                 | 0.006   | 0.356           |
| <b>chr13:15947521-15999246 F</b>                        | chr13:15947521-15999246 F | lincRNA:chr13:15947521-15999246 forward strand                                                                              | -0.47                | 0.002   | 0.092           | -0.61                 | 0.001   | 0.203           |
| <b>Scly</b>                                             | NM_016717                 | ref[Mus musculus selenocysteine lyase (Scly), mRNA [NM_016717]                                                              | -0.39                | 0.002   | 0.092           | -0.50                 | 0.003   | 0.281           |
| <b>Mmp13</b>                                            | NM_008607                 | ref[Mus musculus matrix metalloproteinase 13 (Mmp13), mRNA [NM_008607]                                                      | -1.32                | 0.002   | 0.093           | -0.99                 | 0.004   | 0.308           |
| <b>Rgs7bp</b>                                           | NM_029879                 | ref[Mus musculus regulator of G-protein signalling 7 binding protein (Rgs7bp), mRNA [NM_029879]                             | -0.78                | 0.002   | 0.093           | -0.61                 | 0.003   | 0.281           |
| <b>Tmem22</b>                                           | NM_001101483              | ref[Mus musculus transmembrane protein 22 (Tmem22), mRNA [NM_001101483]                                                     | -0.95                | 0.002   | 0.093           | -0.69                 | 0.023   | 0.453           |
| <b>Rhot2</b>                                            | NM_145999                 | ref[Mus musculus ras homolog gene family, member T2 (Rhot2), nuclear gene encoding mitochondrial protein, mRNA [NM_145999]  | -0.40                | 0.002   | 0.093           | -0.33                 | 0.004   | 0.330           |
| <b>Fam69b</b>                                           | NM_019833                 | ref[Mus musculus family with sequence similarity 69, member B (Fam69b), mRNA [NM_019833]                                    | -0.68                | 0.002   | 0.093           | -0.50                 | 0.015   | 0.420           |
| <b>Asb10</b>                                            | NM_080444                 | ref[Mus musculus ankyrin repeat and SOCS box-containing 10 (Asb10), mRNA [NM_080444]                                        | -0.53                | 0.002   | 0.093           | -0.55                 | 0.011   | 0.407           |
| <b>AI464131</b>                                         | NM_001085515              | ref[Mus musculus expressed sequence AI464131 (AI464131), mRNA [NM_001085515]                                                | -0.41                | 0.002   | 0.094           | -0.24                 | 0.038   | 0.499           |
| <b>Rfx3</b>                                             | NM_011265                 | ref[Mus musculus regulatory factor X, 3 (influences HLA class II expression) (Rfx3), transcript variant 1, mRNA [NM_011265] | -0.41                | 0.002   | 0.094           | -0.42                 | 0.017   | 0.429           |
| <b>6030429G01Rik</b>                                    | NM_001033548              | ref[Mus musculus RIKEN cDNA 6030429G01 gene (6030429G01Rik), mRNA [NM_001033548]                                            | -0.67                | 0.002   | 0.094           | -0.62                 | 0.044   | 0.512           |
| <b>Prosapip1</b>                                        | NM_197945                 | ref[Mus musculus ProSAPIp1 protein (Prosapip1), mRNA [NM_197945]                                                            | -0.85                | 0.002   | 0.094           | -0.60                 | 0.019   | 0.439           |
| <b>Krt222</b>                                           | NM_172946                 | ref[Mus musculus keratin 222 (Krt222), mRNA [NM_172946]                                                                     | -1.01                | 0.002   | 0.095           | -0.92                 | 0.001   | 0.199           |
| <b>Lynx1</b>                                            | NM_011838                 | ref[Mus musculus Ly6/neurotoxin 1 (Lynx1), mRNA [NM_011838]                                                                 | -0.59                | 0.002   | 0.095           | -0.38                 | 0.032   | 0.484           |

Online Supplemental Table IV: mG4H-STZ and Con-STZ Both

| Gene Symbol                     | RefSeq                   | Description                                                                                                                                              | logFC<br>Con-<br>STZ | P-value | Adj.<br>P-value | logFC<br>mG4H-<br>STZ | P-value | Adj.<br>P-value |
|---------------------------------|--------------------------|----------------------------------------------------------------------------------------------------------------------------------------------------------|----------------------|---------|-----------------|-----------------------|---------|-----------------|
| <b>AI415730</b>                 | AK138764                 | gb Mus musculus 0 day neonate thymus cDNA, RIKEN full-length enriched library, clone:A430056F21 product:unclassifiable, full insert sequence. [AK138764] | -0.66                | 0.002   | 0.096           | -0.55                 | 0.022   | 0.451           |
| <b>AU023871</b>                 | NM_001033221             | ref Mus musculus expressed sequence AU023871 (AU023871), mRNA [NM_001033221]                                                                             | -0.51                | 0.002   | 0.096           | -0.34                 | 0.006   | 0.366           |
| <b>Cntfr</b>                    | NM_001136056             | ref Mus musculus ciliary neurotrophic factor receptor (Cntfr), transcript variant 2, mRNA [NM_001136056]                                                 | -0.54                | 0.002   | 0.096           | -0.53                 | 0.004   | 0.336           |
| <b>2610029I01Rik</b>            | NM_029840                | ref Mus musculus RIKEN cDNA 2610029I01 gene (2610029I01Rik), mRNA [NM_029840]                                                                            | -0.41                | 0.002   | 0.096           | -0.31                 | 0.017   | 0.432           |
| <b>Lrtm1</b>                    | NM_176920                | ref Mus musculus leucine-rich repeats and transmembrane domains 1 (Lrtm1), mRNA [NM_176920]                                                              | -1.51                | 0.002   | 0.096           | -0.73                 | 0.024   | 0.463           |
| <b>Gm7781</b>                   | XR_030654                | ref PREDICTED: Mus musculus similar to prohibitin (LOC665773), misc RNA [XR_030654]                                                                      | -0.32                | 0.002   | 0.096           | -0.22                 | 0.020   | 0.447           |
| <b>Esrrg</b>                    | NM_011935                | ref Mus musculus estrogen-related receptor gamma (Esrrg), mRNA [NM_011935]                                                                               | -0.40                | 0.002   | 0.096           | -0.22                 | 0.043   | 0.510           |
| <b>Tarsl2</b>                   | NM_172310                | ref Mus musculus threonyl-tRNA synthetase-like 2 (Tarsl2), mRNA [NM_172310]                                                                              | -0.37                | 0.002   | 0.097           | -0.29                 | 0.010   | 0.403           |
| <b>Gdpd5</b>                    | NM_201352                | ref Mus musculus glycerophosphodiester phosphodiesterase domain containing 5 (Gdpd5), mRNA [NM_201352]                                                   | -0.59                | 0.002   | 0.097           | -0.43                 | 0.016   | 0.426           |
| <b>1810020D17Rik</b>            | NM_001177945             | ref Mus musculus RIKEN cDNA 1810020D17 gene (1810020D17Rik), transcript variant 1, mRNA [NM_001177945]                                                   | -0.34                | 0.002   | 0.098           | -0.27                 | 0.040   | 0.504           |
| <b>Suv420h2</b>                 | NM_146177                | ref Mus musculus suppressor of variegation 4-20 homolog 2 (Drosophila) (Suv420h2), transcript variant 1, mRNA [NM_146177]                                | -0.33                | 0.002   | 0.099           | -0.42                 | 0.014   | 0.418           |
| <b>Lgi1</b>                     | NM_020278                | ref Mus musculus leucine-rich repeat LGI family, member 1 (Lgi1), mRNA [NM_020278]                                                                       | -0.93                | 0.002   | 0.099           | -0.77                 | 0.002   | 0.281           |
| <b>chr6:11994002-11997859_F</b> | chr6:11994002-11997859_F | lincRNA:chr6:11994002-11997859 forward strand                                                                                                            | -0.43                | 0.002   | 0.099           | -0.36                 | 0.009   | 0.394           |



Online Supplemental Table IV: mG4H-STZ and Con-STZ Both

| Gene Symbol                      | RefSeq                    | Description                                                                                                                                                  | logFC<br>Con-<br>STZ | P-value | Adj.<br>P-value | logFC<br>mG4H-<br>STZ | P-value | Adj.<br>P-value |
|----------------------------------|---------------------------|--------------------------------------------------------------------------------------------------------------------------------------------------------------|----------------------|---------|-----------------|-----------------------|---------|-----------------|
| <b>St6galnac1</b>                | NM_011371                 | ref Mus musculus ST6 (alpha-N-acetyl-neuraminy-2,3-beta-galactosyl-1,3)-N-acetylgalactosaminide alpha-2,6-sialyltransferase 1 (St6galnac1), mRNA [NM_011371] | -0.98                | 0.002   | 0.099           | -0.59                 | 0.038   | 0.499           |
| <b>Mmp15</b>                     | NM_008609                 | ref Mus musculus matrix metalloproteinase 15 (Mmp15), mRNA [NM_008609]                                                                                       | -0.77                | 0.002   | 0.099           | -0.56                 | 0.008   | 0.391           |
| <b>Gm2651</b>                    | XR_031747                 | ref PREDICTED: Mus musculus similar to COX11 homolog, cytochrome c oxidase assembly protein (yeast) (LOC100040185), misc RNA [XR_031747]                     | -0.38                | 0.002   | 0.099           | -0.31                 | 0.008   | 0.391           |
| <b>chr14:77511189-77522852_F</b> | chr14:77511189-77522852_F | lincRNA:chr14:77511189-77522852 forward strand                                                                                                               | -0.58                | 0.002   | 0.099           | -0.45                 | 0.001   | 0.197           |
| <b>Camk2b</b>                    | NM_001174053              | ref Mus musculus calcium/calmodulin-dependent protein kinase II, beta (Camk2b), transcript variant 1, mRNA [NM_001174053]                                    | -0.56                | 0.002   | 0.099           | -0.35                 | 0.030   | 0.477           |
| <b>Lrrc27</b>                    | NM_027164                 | ref Mus musculus leucine rich repeat containing 27 (Lrrc27), transcript variant 1, mRNA [NM_027164]                                                          | -0.55                | 0.002   | 0.099           | -0.56                 | 0.015   | 0.418           |
| <b>S1pr5</b>                     | NM_053190                 | ref Mus musculus sphingosine-1-phosphate receptor 5 (S1pr5), mRNA [NM_053190]                                                                                | -1.11                | 0.002   | 0.100           | -0.70                 | 0.011   | 0.407           |
| <b>Gsta4</b>                     | NM_010357                 | ref Mus musculus glutathione S-transferase, alpha 4 (Gsta4), mRNA [NM_010357]                                                                                | -0.38                | 0.002   | 0.100           | -0.26                 | 0.014   | 0.418           |
| <b>Dmpk</b>                      | NM_032418                 | ref Mus musculus dystrophin myotonic-protein kinase (Dmpk), transcript variant 1, mRNA [NM_032418]                                                           | -0.35                | 0.002   | 0.100           | -0.21                 | 0.029   | 0.477           |
| <b>Six5</b>                      | NM_011383                 | ref Mus musculus sine oculis-related homeobox 5 homolog (Drosophila) (Six5), mRNA [NM_011383]                                                                | -0.45                | 0.002   | 0.100           | -0.33                 | 0.050   | 0.520           |
| <b>Deb1</b>                      | NM_026794                 | ref Mus musculus differentially expressed in B16F10 1 (Deb1), mRNA [NM_026794]                                                                               | -0.34                | 0.002   | 0.100           | -0.26                 | 0.014   | 0.418           |
| <b>Bcl11b</b>                    | NM_001079883              | ref Mus musculus B-cell leukemia/lymphoma 11B (Bcl11b), transcript variant 1, mRNA [NM_001079883]                                                            | -0.94                | 0.002   | 0.101           | -0.87                 | 0.004   | 0.324           |
| <b>Kcnj12</b>                    | NM_010603                 | ref Mus musculus potassium inwardly-rectifying channel, subfamily J, member 12 (Kcnj12), mRNA [NM_010603]                                                    | -0.47                | 0.002   | 0.101           | -0.35                 | 0.047   | 0.515           |
| <b>Cdc14b</b>                    | NM_172587                 | ref Mus musculus CDC14 cell division cycle 14 homolog B (S. cerevisiae) (Cdc14b), transcript variant 1, mRNA [NM_172587]                                     | -0.71                | 0.002   | 0.101           | -0.57                 | 0.015   | 0.423           |

| Online Supplemental Table IV: mG4H-STZ and Con-STZ Both |                    |                                                                                                                                                                 |                      |         |                 |                       |         |                 |
|---------------------------------------------------------|--------------------|-----------------------------------------------------------------------------------------------------------------------------------------------------------------|----------------------|---------|-----------------|-----------------------|---------|-----------------|
| Gene Symbol                                             | RefSeq             | Description                                                                                                                                                     | logFC<br>Con-<br>STZ | P-value | Adj.<br>P-value | logFC<br>mG4H-<br>STZ | P-value | Adj.<br>P-value |
| <b>Smtnl2</b>                                           | NM_177776          | ref Mus musculus smoothelin-like 2 (Smtnl2), mRNA [NM_177776]                                                                                                   | -0.71                | 0.002   | 0.101           | -0.69                 | 0.017   | 0.432           |
| <b>Bcs1l</b>                                            | NM_025784          | ref Mus musculus BCS1-like (yeast) (Bcs1l), nuclear gene encoding mitochondrial protein, mRNA [NM_025784]                                                       | -0.33                | 0.002   | 0.101           | -0.33                 | 0.011   | 0.407           |
| <b>A630039O03Rik</b>                                    | AK041809           | gb Mus musculus 3 days neonate thymus cDNA, RIKEN full-length enriched library, clone:A630039O03 product:unclassifiable, full insert sequence. [AK041809]       | -1.12                | 0.002   | 0.102           | -0.86                 | 0.007   | 0.374           |
| <b>Ak3</b>                                              | NM_021299          | ref Mus musculus adenylate kinase 3 (Ak3), nuclear gene encoding mitochondrial protein, mRNA [NM_021299]                                                        | -0.30                | 0.002   | 0.102           | -0.33                 | 0.017   | 0.429           |
| <b>Gm10635</b>                                          | AK142702           | gb Mus musculus 16 days neonate heart cDNA, RIKEN full-length enriched library, clone:D830014K04 product:hypothetical protein, full insert sequence. [AK142702] | -0.59                | 0.002   | 0.102           | -0.41                 | 0.022   | 0.450           |
| <b>Esm1</b>                                             | NM_023612          | ref Mus musculus endothelial cell-specific molecule 1 (Esm1), mRNA [NM_023612]                                                                                  | -1.15                | 0.002   | 0.102           | -1.18                 | 0.012   | 0.410           |
| <b>B230208H17Rik</b>                                    | NM_001024616       | ref Mus musculus RIKEN cDNA B230208H17 gene (B230208H17Rik), mRNA [NM_001024616]                                                                                | -0.34                | 0.002   | 0.102           | -0.27                 | 0.015   | 0.420           |
| <b>Vstm2l</b>                                           | NM_198627          | ref Mus musculus V-set and transmembrane domain containing 2-like (Vstm2l), mRNA [NM_198627]                                                                    | -0.56                | 0.002   | 0.103           | -0.50                 | 0.013   | 0.412           |
| <b>Adamts17</b>                                         | NM_001033877       | ref Mus musculus a disintegrin-like and metalloproteinase (reprolysin type) with thrombospondin type 1 motif, 17 (Adamts17), mRNA [NM_001033877]                | -1.53                | 0.002   | 0.103           | -1.39                 | 0.016   | 0.424           |
| <b>Zfp238</b>                                           | NM_013915          | ref Mus musculus zinc finger protein 238 (Zfp238), transcript variant 2, mRNA [NM_013915]                                                                       | -0.33                | 0.002   | 0.104           | -0.21                 | 0.038   | 0.499           |
| <b>Shc4</b>                                             | NM_199022          | ref Mus musculus SHC (Src homology 2 domain containing) family, member 4 (Shc4), mRNA [NM_199022]                                                               | -0.85                | 0.003   | 0.105           | -0.56                 | 0.024   | 0.459           |
| <b>ENSMUST00000098556</b>                               | ENSMUST00000098556 | ens guanine nucleotide binding protein (G protein), beta 5 Gene [Source:MGI Symbol;Acc:MGI:101848] [ENSMUST00000098556]                                         | -0.33                | 0.003   | 0.105           | -0.26                 | 0.020   | 0.443           |
| <b>1110058L19Rik</b>                                    | NM_026503          | ref Mus musculus RIKEN cDNA 1110058L19 gene (1110058L19Rik), mRNA [NM_026503]                                                                                   | -0.45                | 0.003   | 0.105           | -0.59                 | 0.015   | 0.423           |

| Online Supplemental Table IV: mG4H-STZ and Con-STZ Both |                            |                                                                                                                                                                               |                      |         |                 |                       |         |                 |
|---------------------------------------------------------|----------------------------|-------------------------------------------------------------------------------------------------------------------------------------------------------------------------------|----------------------|---------|-----------------|-----------------------|---------|-----------------|
| Gene Symbol                                             | RefSeq                     | Description                                                                                                                                                                   | logFC<br>Con-<br>STZ | P-value | Adj.<br>P-value | logFC<br>mG4H-<br>STZ | P-value | Adj.<br>P-value |
| Hopx                                                    | NM_175606                  | ref Mus musculus HOP homeobox (Hopx), transcript variant 1, mRNA [NM_175606]                                                                                                  | -0.38                | 0.003   | 0.106           | -0.37                 | 0.009   | 0.398           |
| Th1l                                                    | NM_020580                  | ref Mus musculus TH1-like homolog (Drosophila) (Th1l), mRNA [NM_020580]                                                                                                       | -0.35                | 0.003   | 0.106           | -0.21                 | 0.050   | 0.520           |
| Snai3                                                   | NM_013914                  | ref Mus musculus snail homolog 3 (Drosophila) (Snai3), mRNA [NM_013914]                                                                                                       | -0.46                | 0.003   | 0.106           | -0.31                 | 0.047   | 0.515           |
| Gm9755                                                  | XM_001476294               | ref  PREDICTED: Mus musculus similar to Tu translation elongation factor, mitochondrial (LOC100046745), mRNA [XM_001476294]                                                   | -0.36                | 0.003   | 0.106           | -0.36                 | 0.012   | 0.407           |
| Tmem179                                                 | NM_178915                  | ref  Mus musculus transmembrane protein 179 (Tmem179), mRNA [NM_178915]                                                                                                       | -0.49                | 0.003   | 0.106           | -0.29                 | 0.032   | 0.485           |
| Hs1bp3                                                  | NM_021429                  | ref  Mus musculus HCLS1 binding protein 3 (Hs1bp3), mRNA [NM_021429]                                                                                                          | -0.29                | 0.003   | 0.106           | -0.35                 | 0.011   | 0.407           |
| Hmgb3                                                   | NM_008253                  | ref  Mus musculus high mobility group box 3 (Hmgb3), mRNA [NM_008253]                                                                                                         | -0.40                | 0.003   | 0.107           | -0.26                 | 0.034   | 0.492           |
| Dmpk                                                    | NM_032418                  | ref  Mus musculus dystrophia myotonica-protein kinase (Dmpk), transcript variant 1, mRNA [NM_032418]                                                                          | -0.50                | 0.003   | 0.107           | -0.35                 | 0.049   | 0.519           |
| Dlat                                                    | NM_145614                  | ref  Mus musculus dihydrolipoamide S-acetyltransferase (E2 component of pyruvate dehydrogenase complex) (Dlat), nuclear gene encoding mitochondrial protein, mRNA [NM_145614] | -0.43                | 0.003   | 0.109           | -0.34                 | 0.013   | 0.412           |
| Tmem93                                                  | NM_001168470               | ref  Mus musculus transmembrane protein 93 (Tmem93), transcript variant 1, mRNA [NM_001168470]                                                                                | -0.32                | 0.003   | 0.109           | -0.27                 | 0.012   | 0.409           |
| chr3:145269449-145298239_R                              | chr3:145269449-145298239_R | lincRNA:chr3:145269449-145298239 reverse strand                                                                                                                               | -0.63                | 0.003   | 0.111           | -0.55                 | 0.008   | 0.391           |
| chr16:40307070-40308718_F                               | chr16:40307070-40308718_F  | lincRNA:chr16:40307070-40308718 forward strand                                                                                                                                | -0.36                | 0.003   | 0.111           | -0.76                 | 0.004   | 0.312           |
| Cbr4                                                    | NM_145595                  | ref  Mus musculus carbonyl reductase 4 (Cbr4), mRNA [NM_145595]                                                                                                               | -0.31                | 0.003   | 0.113           | -0.26                 | 0.019   | 0.441           |
| Hist2h4                                                 | NM_033596                  | ref  Mus musculus histone cluster 2, H4 (Hist2h4), mRNA [NM_033596]                                                                                                           | -0.59                | 0.003   | 0.113           | -0.51                 | 0.003   | 0.281           |

| Online Supplemental Table IV: mG4H-STZ and Con-STZ Both |                    |                                                                                                                                               |                      |         |                 |                       |         |                 |
|---------------------------------------------------------|--------------------|-----------------------------------------------------------------------------------------------------------------------------------------------|----------------------|---------|-----------------|-----------------------|---------|-----------------|
| Gene Symbol                                             | RefSeq             | Description                                                                                                                                   | logFC<br>Con-<br>STZ | P-value | Adj.<br>P-value | logFC<br>mG4H-<br>STZ | P-value | Adj.<br>P-value |
| <b>Mrpl12</b>                                           | NM_027204          | ref  Mus musculus mitochondrial ribosomal protein L12 (Mrpl12), nuclear gene encoding mitochondrial protein, mRNA [NM_027204]                 | -0.35                | 0.003   | 0.114           | -0.22                 | 0.041   | 0.507           |
| <b>Kcnn1</b>                                            | NM_032397          | ref  Mus musculus potassium intermediate/small conductance calcium-activated channel, subfamily N, member 1 (Kcnn1), mRNA [NM_032397]         | -0.56                | 0.003   | 0.114           | -0.64                 | 0.015   | 0.420           |
| <b>2010305A19Rik</b>                                    | NM_027250          | ref  Mus musculus RIKEN cDNA 2010305A19 gene (2010305A19Rik), mRNA [NM_027250]                                                                | -0.34                | 0.003   | 0.114           | -0.21                 | 0.034   | 0.493           |
| <b>ENSMUST00000113652</b>                               | ENSMUST00000113652 | ens ATPase, aminophospholipid transporter (APLT), class I, type 8A, member 1 Gene [Source:MGI (curated);Acc:MGI:1330848] [ENSMUST00000113652] | -0.33                | 0.003   | 0.114           | -0.31                 | 0.024   | 0.459           |
| <b>3010026O09Rik</b>                                    | NM_026543          | ref  Mus musculus RIKEN cDNA 3010026O09 gene (3010026O09Rik), mRNA [NM_026543]                                                                | -0.55                | 0.003   | 0.115           | -0.47                 | 0.010   | 0.401           |
| <b>Rhox2h</b>                                           | NM_001100465       | ref  Mus musculus reproductive homeobox 2H (Rhox2h), mRNA [NM_001100465]                                                                      | -0.55                | 0.003   | 0.115           | -0.60                 | 0.012   | 0.408           |
| <b>Syt3</b>                                             | NM_016663          | ref Mus musculus synaptotagmin III (Syt3), transcript variant 1, mRNA [NM_016663]                                                             | -0.45                | 0.003   | 0.115           | -0.35                 | 0.019   | 0.439           |
| <b>Mblac2</b>                                           | NM_028372          | ref Mus musculus metallo-beta-lactamase domain containing 2 (Mblac2), mRNA [NM_028372]                                                        | -0.47                | 0.003   | 0.115           | -0.42                 | 0.018   | 0.435           |
| <b>Pkm2</b>                                             | NM_011099          | ref  Mus musculus pyruvate kinase, muscle (Pkm2), mRNA [NM_011099]                                                                            | -0.31                | 0.003   | 0.115           | -0.23                 | 0.046   | 0.513           |
| <b>Hdac11</b>                                           | NM_144919          | ref  Mus musculus histone deacetylase 11 (Hdac11), mRNA [NM_144919]                                                                           | -0.62                | 0.003   | 0.116           | -0.27                 | 0.023   | 0.456           |
| <b>Auh</b>                                              | NM_016709          | ref  Mus musculus AU RNA binding protein/enoyl-coenzyme A hydratase (Auh), nuclear gene encoding mitochondrial protein, mRNA [NM_016709]      | -0.35                | 0.003   | 0.117           | -0.31                 | 0.009   | 0.397           |
| <b>Gm13948</b>                                          | XM_283255          | ref  PREDICTED: Mus musculus similar to T-cell receptor alpha chain V region CTL-F3 precursor (LOC328483), mRNA [XM_283255]                   | -1.09                | 0.003   | 0.117           | -1.11                 | 0.007   | 0.384           |
| <b>Pkia</b>                                             | NM_008862          | ref  Mus musculus protein kinase inhibitor, alpha (Pkia), mRNA [NM_008862]                                                                    | -0.53                | 0.003   | 0.117           | -0.38                 | 0.020   | 0.447           |

| Online Supplemental Table IV: mG4H-STZ and Con-STZ Both |                           |                                                                                                                              |                      |         |                 |                       |         |                 |
|---------------------------------------------------------|---------------------------|------------------------------------------------------------------------------------------------------------------------------|----------------------|---------|-----------------|-----------------------|---------|-----------------|
| Gene Symbol                                             | RefSeq                    | Description                                                                                                                  | logFC<br>Con-<br>STZ | P-value | Adj.<br>P-value | logFC<br>mG4H-<br>STZ | P-value | Adj.<br>P-value |
| <b>Smtn</b>                                             | NM_013870                 | ref Mus musculus smoothelin (Smtn), transcript variant 2, mRNA [NM_013870]                                                   | -0.46                | 0.003   | 0.117           | -0.35                 | 0.030   | 0.480           |
| <b>Ecm2</b>                                             | NM_001012324              | ref Mus musculus extracellular matrix protein 2, female organ and adipocyte specific (Ecm2), mRNA [NM_001012324]             | -0.62                | 0.003   | 0.117           | -0.88                 | 0.011   | 0.406           |
| <b>Nr2f1</b>                                            | NM_010151                 | ref Mus musculus nuclear receptor subfamily 2, group F, member 1 (Nr2f1), mRNA [NM_010151]                                   | -0.39                | 0.003   | 0.117           | -0.36                 | 0.038   | 0.499           |
| <b>Ift122</b>                                           | NM_031177                 | ref Mus musculus intraflagellar transport 122 homolog (Chlamydomonas) (Ift122), transcript variant 1, mRNA [NM_031177]       | -0.40                | 0.003   | 0.118           | -0.38                 | 0.042   | 0.508           |
| <b>Klf12</b>                                            | NM_010636                 | ref Mus musculus Kruppel-like factor 12 (Klf12), mRNA [NM_010636]                                                            | -0.42                | 0.003   | 0.118           | -0.35                 | 0.027   | 0.473           |
| <b>Mycbpap</b>                                          | NM_170671                 | ref Mus musculus MYCBP associated protein (Mycbpap), mRNA [NM_170671]                                                        | -0.45                | 0.003   | 0.118           | -0.52                 | 0.002   | 0.279           |
| <b>chr13:58474388-58487288_R</b>                        | chr13:58474388-58487288_R | lincRNA:chr13:58474388-58487288 reverse strand                                                                               | -0.32                | 0.003   | 0.118           | -0.27                 | 0.029   | 0.477           |
| <b>Mrpl18</b>                                           | NM_026310                 | ref Mus musculus mitochondrial ribosomal protein L18 (Mrpl18), nuclear gene encoding mitochondrial protein, mRNA [NM_026310] | -0.42                | 0.003   | 0.119           | -0.41                 | 0.008   | 0.391           |
| <b>Zcchc17</b>                                          | NM_153160                 | ref Mus musculus zinc finger, CCHC domain containing 17 (Zcchc17), mRNA [NM_153160]                                          | -0.32                | 0.003   | 0.119           | -0.26                 | 0.036   | 0.495           |
| <b>2010107G23Rik</b>                                    | NM_027251                 | ref Mus musculus RIKEN cDNA 2010107G23 gene (2010107G23Rik), mRNA [NM_027251]                                                | -0.39                | 0.003   | 0.120           | -0.49                 | 0.033   | 0.490           |
| <b>D430019H16Rik</b>                                    | BC058677                  | gb Mus musculus RIKEN cDNA D430019H16 gene, mRNA (cDNA clone IMAGE:6834465), partial cds. [BC058677]                         | -0.76                | 0.003   | 0.121           | -0.74                 | 0.012   | 0.409           |
| <b>Prkra</b>                                            | NM_011871                 | ref Mus musculus protein kinase, interferon inducible double stranded RNA dependent activator (Prkra), mRNA [NM_011871]      | -0.31                | 0.003   | 0.121           | -0.36                 | 0.005   | 0.344           |
| <b>Fabp7</b>                                            | NM_021272                 | ref Mus musculus fatty acid binding protein 7, brain (Fabp7), mRNA [NM_021272]                                               | -0.84                | 0.003   | 0.122           | -0.82                 | 0.003   | 0.290           |
| <b>ENSMUST00000107918</b>                               | ENSMUST00000107918        | ref  PREDICTED: Mus musculus similar to LOC569648 protein (LOC100040293), mRNA [XM_001474446]                                | -0.59                | 0.003   | 0.122           | -0.47                 | 0.015   | 0.423           |

Online Supplemental Table IV: mG4H-STZ and Con-STZ Both

| Gene Symbol         | RefSeq       | Description                                                                                                                                                                    | logFC<br>Con-<br>STZ | P-value | Adj.<br>P-value | logFC<br>mG4H-<br>STZ | P-value | Adj.<br>P-value |
|---------------------|--------------|--------------------------------------------------------------------------------------------------------------------------------------------------------------------------------|----------------------|---------|-----------------|-----------------------|---------|-----------------|
| <b>Alad</b>         | NM_008525    | ref Mus musculus aminolevulinate, delta-, dehydratase (Alad), mRNA [NM_008525]                                                                                                 | -0.38                | 0.003   | 0.123           | -0.41                 | 0.007   | 0.384           |
| <b>Cdh13</b>        | NM_019707    | ref Mus musculus cadherin 13 (Cdh13), mRNA [NM_019707]                                                                                                                         | -0.34                | 0.003   | 0.123           | -0.30                 | 0.017   | 0.433           |
| <b>LOC100046998</b> | XM_001477204 | ref PREDICTED: Mus musculus similar to optic atrophy 1 (autosomal dominant) (LOC100046998), mRNA [XM_001477204]                                                                | -0.34                | 0.003   | 0.123           | -0.29                 | 0.013   | 0.412           |
| <b>Bcl6</b>         | NM_009744    | ref Mus musculus B-cell leukemia/lymphoma 6 (Bcl6), mRNA [NM_009744]                                                                                                           | -0.68                | 0.003   | 0.123           | -0.64                 | 0.044   | 0.512           |
| <b>Col4a4</b>       | NM_007735    | ref Mus musculus collagen, type IV, alpha 4 (Col4a4), mRNA [NM_007735]                                                                                                         | -0.47                | 0.003   | 0.124           | -0.64                 | 0.004   | 0.325           |
| <b>Tomm5</b>        | NM_001134646 | ref Mus musculus translocase of outer mitochondrial membrane 5 homolog (yeast) (Tomm5), nuclear gene encoding mitochondrial protein, transcript variant 2, mRNA [NM_001134646] | -0.40                | 0.003   | 0.124           | -0.47                 | 0.006   | 0.369           |
| <b>Add3</b>         | NM_001164099 | ref Mus musculus adducin 3 (gamma) (Add3), transcript variant 1, mRNA [NM_001164099]                                                                                           | -0.36                | 0.003   | 0.124           | -0.38                 | 0.015   | 0.419           |
| <b>Igfbpl1</b>      | NM_018741    | ref Mus musculus insulin-like growth factor binding protein-like 1 (Igfbpl1), mRNA [NM_018741]                                                                                 | -0.72                | 0.003   | 0.124           | -0.63                 | 0.004   | 0.325           |
| <b>Ccdc51</b>       | NM_025689    | ref Mus musculus coiled-coil domain containing 51 (Ccdc51), mRNA [NM_025689]                                                                                                   | -0.37                | 0.003   | 0.124           | -0.34                 | 0.015   | 0.420           |
| <b>Clec1b</b>       | NM_019985    | ref Mus musculus C-type lectin domain family 1, member b (Clec1b), mRNA [NM_019985]                                                                                            | -0.68                | 0.003   | 0.125           | -0.53                 | 0.011   | 0.407           |
| <b>Rpusd4</b>       | NM_028040    | ref Mus musculus RNA pseudouridylate synthase domain containing 4 (Rpusd4), mRNA [NM_028040]                                                                                   | -0.38                | 0.004   | 0.126           | -0.46                 | 0.011   | 0.406           |
| <b>Gorasp1</b>      | NM_028976    | ref Mus musculus golgi reassembly stacking protein 1 (Gorasp1), mRNA [NM_028976]                                                                                               | -0.32                | 0.004   | 0.126           | -0.29                 | 0.046   | 0.513           |
| <b>Gm4535</b>       | NM_001101644 | ref Mus musculus predicted gene 4535 (Gm4535), mRNA [NM_001101644]                                                                                                             | -0.47                | 0.004   | 0.127           | -0.45                 | 0.008   | 0.390           |
| <b>Idi1</b>         | NM_145360    | ref Mus musculus isopentenyl-diphosphate delta isomerase (Idi1), mRNA [NM_145360]                                                                                              | -0.47                | 0.004   | 0.127           | -0.47                 | 0.021   | 0.448           |



Online Supplemental Table IV: mG4H-STZ and Con-STZ Both

| Gene Symbol                      | RefSeq                    | Description                                                                                                                           | logFC<br>Con-<br>STZ | P-value | Adj.<br>P-value | logFC<br>mG4H-<br>STZ | P-value | Adj.<br>P-value |
|----------------------------------|---------------------------|---------------------------------------------------------------------------------------------------------------------------------------|----------------------|---------|-----------------|-----------------------|---------|-----------------|
| <b>Tead1</b>                     | NM_001166584              | ref Mus musculus TEA domain family member 1 (Tead1), transcript variant 1, mRNA [NM_001166584]                                        | -0.26                | 0.004   | 0.127           | -0.27                 | 0.008   | 0.390           |
| <b>Dnajc15</b>                   | NM_025384                 | ref Mus musculus DnaJ (Hsp40) homolog, subfamily C, member 15 (Dnajc15), mRNA [NM_025384]                                             | -0.28                | 0.004   | 0.128           | -0.21                 | 0.030   | 0.480           |
| <b>Coq5</b>                      | NM_026504                 | ref Mus musculus coenzyme Q5 homolog, methyltransferase (yeast) (Coq5), nuclear gene encoding mitochondrial protein, mRNA [NM_026504] | -0.35                | 0.004   | 0.129           | -0.30                 | 0.011   | 0.407           |
| <b>Crygb</b>                     | NM_144761                 | ref Mus musculus crystallin, gamma B (Crygb), mRNA [NM_144761]                                                                        | -0.86                | 0.004   | 0.129           | -0.49                 | 0.018   | 0.435           |
| <b>1810030N24Rik</b>             | NM_025471                 | ref Mus musculus RIKEN cDNA 1810030N24 gene (1810030N24Rik), mRNA [NM_025471]                                                         | -0.31                | 0.004   | 0.129           | -0.31                 | 0.027   | 0.472           |
| <b>Cabp5</b>                     | NM_013877                 | ref Mus musculus calcium binding protein 5 (Cabp5), mRNA [NM_013877]                                                                  | -0.78                | 0.004   | 0.129           | -0.61                 | 0.020   | 0.445           |
| <b>Gm10078</b>                   | XM_001476956              | ref PREDICTED: Mus musculus similar to mitochondrial ribosomal protein S36 (LOC100047151), mRNA [XM_001476956]                        | -0.32                | 0.004   | 0.129           | -0.28                 | 0.019   | 0.437           |
| <b>Nipa1</b>                     | NM_153578                 | ref Mus musculus non imprinted in Prader-Willi/Angelman syndrome 1 homolog (human) (Nipa1), mRNA [NM_153578]                          | -0.46                | 0.004   | 0.129           | -0.50                 | 0.011   | 0.407           |
| <b>Nudt2</b>                     | NM_025539                 | ref Mus musculus nudix (nucleoside diphosphate linked moiety X)-type motif 2 (Nudt2), mRNA [NM_025539]                                | -0.34                | 0.004   | 0.129           | -0.37                 | 0.008   | 0.391           |
| <b>Pin1</b>                      | NM_023371                 | ref Mus musculus protein (peptidyl-prolyl cis/trans isomerase) NIMA-interacting 1 (Pin1), mRNA [NM_023371]                            | -0.29                | 0.004   | 0.129           | -0.24                 | 0.036   | 0.495           |
| <b>Gm9732</b>                    | ENSMUST00000100701        | ens RIKEN cDNA 1700049E17 gene, gene 1 Gene [Source:MGI Symbol;Acc:MGI:1920665] [ENSMUST00000100701]                                  | -0.61                | 0.004   | 0.129           | -1.29                 | 0.044   | 0.512           |
| <b>9030617O03Rik</b>             | NM_145448                 | ref Mus musculus RIKEN cDNA 9030617O03 gene (9030617O03Rik), mRNA [NM_145448]                                                         | -0.49                | 0.004   | 0.130           | -0.38                 | 0.029   | 0.477           |
| <b>chr4:21683562-21694350_R</b>  | chr4:21683562-21694350_R  | lincRNA:chr4:21683562-21694350 reverse strand                                                                                         | -0.37                | 0.004   | 0.130           | -0.36                 | 0.028   | 0.476           |
| <b>chr12:88172043-88172731_R</b> | chr12:88172043-88172731_R | lincRNA:chr12:88172043-88172731 reverse strand                                                                                        | -0.49                | 0.004   | 0.130           | -0.51                 | 0.003   | 0.281           |

Online Supplemental Table IV: mG4H-STZ and Con-STZ Both

| Gene Symbol                      | RefSeq                    | Description                                                                                                                      | logFC<br>Con-<br>STZ | P-value | Adj.<br>P-value | logFC<br>mG4H-<br>STZ | P-value | Adj.<br>P-value |
|----------------------------------|---------------------------|----------------------------------------------------------------------------------------------------------------------------------|----------------------|---------|-----------------|-----------------------|---------|-----------------|
| <b>Chac2</b>                     | NM_026527                 | ref Mus musculus ChaC, cation transport regulator homolog 2 (E. coli) (Chac2), mRNA [NM_026527]                                  | -0.38                | 0.004   | 0.130           | -0.31                 | 0.018   | 0.435           |
| <b>Spna1</b>                     | NM_011465                 | ref Mus musculus spectrin alpha 1 (Spna1), mRNA [NM_011465]                                                                      | -0.85                | 0.004   | 0.130           | -0.69                 | 0.022   | 0.452           |
| <b>Cd1d1</b>                     | NM_007639                 | ref Mus musculus CD1d1 antigen (Cd1d1), mRNA [NM_007639]                                                                         | -0.46                | 0.004   | 0.130           | -0.38                 | 0.013   | 0.412           |
| <b>chr17:6426800-6528950_R</b>   | chr17:6426800-6528950_R   | lincRNA:chr17:6426800-6528950 reverse strand                                                                                     | -0.40                | 0.004   | 0.130           | -0.31                 | 0.015   | 0.419           |
| <b>Tle2</b>                      | NM_019725                 | ref Mus musculus transducin-like enhancer of split 2, homolog of Drosophila E(spl) (Tle2), mRNA [NM_019725]                      | -0.37                | 0.004   | 0.130           | -0.32                 | 0.006   | 0.356           |
| <b>Pilra</b>                     | NM_153510                 | ref Mus musculus paired immunoglobulin-like type 2 receptor alpha (Pilra), mRNA [NM_153510]                                      | -0.38                | 0.004   | 0.131           | -0.56                 | 0.020   | 0.447           |
| <b>chr18:47254152-47254844_F</b> | chr18:47254152-47254844_F | lincRNA:chr18:47254152-47254844 forward strand                                                                                   | -0.43                | 0.004   | 0.131           | -0.51                 | 0.041   | 0.505           |
| <b>Ipo13</b>                     | NM_146152                 | ref Mus musculus importin 13 (Ipo13), mRNA [NM_146152]                                                                           | -0.41                | 0.004   | 0.131           | -0.34                 | 0.035   | 0.494           |
| <b>Tpcn1</b>                     | NM_145853                 | ref Mus musculus two pore channel 1 (Tpcn1), mRNA [NM_145853]                                                                    | -0.38                | 0.004   | 0.131           | -0.44                 | 0.010   | 0.403           |
| <b>Mrps12</b>                    | NM_011885                 | ref Mus musculus mitochondrial ribosomal protein S12 (Mrps12), nuclear gene encoding mitochondrial protein, mRNA [NM_011885]     | -0.33                | 0.004   | 0.132           | -0.39                 | 0.010   | 0.405           |
| <b>E130203B14Rik</b>             | NM_178791                 | ref Mus musculus RIKEN cDNA E130203B14 gene (E130203B14Rik), mRNA [NM_178791]                                                    | -0.64                | 0.004   | 0.132           | -0.67                 | 0.008   | 0.391           |
| <b>Gm6949</b>                    | XR_033288                 | ref PREDICTED: Mus musculus similar to Creatine kinase B-type (Creatine kinase B chain) (B-CK) (LOC629121), misc RNA [XR_033288] | -0.69                | 0.004   | 0.133           | -0.82                 | 0.003   | 0.283           |
| <b>Lrrc14b</b>                   | NM_001033042              | ref Mus musculus leucine rich repeat containing 14B (Lrrc14b), mRNA [NM_001033042]                                               | -0.61                | 0.004   | 0.133           | -0.55                 | 0.017   | 0.429           |
| <b>Fam173b</b>                   | NM_026546                 | ref Mus musculus family with sequence similarity 173, member B (Fam173b), mRNA [NM_026546]                                       | -0.40                | 0.004   | 0.133           | -0.38                 | 0.033   | 0.487           |
| <b>Tet1</b>                      | NM_027384                 | ref Mus musculus tet oncogene 1 (Tet1), mRNA [NM_027384]                                                                         | -0.96                | 0.004   | 0.134           | -0.88                 | 0.022   | 0.450           |

| Online Supplemental Table IV: mG4H-STZ and Con-STZ Both |                    |                                                                                                                                                                                         |                      |         |                 |                       |         |                 |
|---------------------------------------------------------|--------------------|-----------------------------------------------------------------------------------------------------------------------------------------------------------------------------------------|----------------------|---------|-----------------|-----------------------|---------|-----------------|
| Gene Symbol                                             | RefSeq             | Description                                                                                                                                                                             | logFC<br>Con-<br>STZ | P-value | Adj.<br>P-value | logFC<br>mG4H-<br>STZ | P-value | Adj.<br>P-value |
| Tspan13                                                 | NM_025359          | ref Mus musculus tetraspanin 13 (Tspan13), mRNA [NM_025359]                                                                                                                             | -0.49                | 0.004   | 0.134           | -0.52                 | 0.020   | 0.447           |
| H2-gs10                                                 | NM_001143689       | ref Mus musculus MHC class I like protein GS10 (H2-gs10), mRNA [NM_001143689]                                                                                                           | -0.32                | 0.004   | 0.134           | -0.34                 | 0.018   | 0.435           |
| Tpbpb                                                   | NM_026429          | ref Mus musculus trophoblast specific protein beta (Tpbpb), mRNA [NM_026429]                                                                                                            | -0.50                | 0.004   | 0.135           | -0.88                 | 0.019   | 0.441           |
| Hist1h2ba                                               | NM_175663          | ref Mus musculus histone cluster 1, H2ba (Hist1h2ba), mRNA [NM_175663]                                                                                                                  | -0.38                | 0.004   | 0.135           | -0.30                 | 0.009   | 0.393           |
| Hemk1                                                   | NM_133984          | ref Mus musculus HemK methyltransferase family member 1 (Hemk1), mRNA [NM_133984]                                                                                                       | -0.34                | 0.004   | 0.135           | -0.28                 | 0.015   | 0.420           |
| Dnmt3a                                                  | NM_007872          | ref Mus musculus DNA methyltransferase 3A (Dnmt3a), transcript variant 1, mRNA [NM_007872]                                                                                              | -0.45                | 0.004   | 0.135           | -0.58                 | 0.049   | 0.518           |
| Sema5b                                                  | NM_013661          | ref Mus musculus sema domain, seven thrombospondin repeats (type 1 and type 1-like), transmembrane domain (TM) and short cytoplasmic domain, (semaphorin) 5B (Sema5b), mRNA [NM_013661] | -0.56                | 0.004   | 0.135           | -0.54                 | 0.011   | 0.407           |
| Hemk1                                                   | NM_133984          | ref Mus musculus HemK methyltransferase family member 1 (Hemk1), mRNA [NM_133984]                                                                                                       | -0.40                | 0.004   | 0.136           | -0.28                 | 0.024   | 0.459           |
| Grb14                                                   | NM_016719          | ref Mus musculus growth factor receptor bound protein 14 (Grb14), mRNA [NM_016719]                                                                                                      | -0.41                | 0.004   | 0.136           | -0.37                 | 0.014   | 0.417           |
| Gtpbp5                                                  | NM_181424          | ref Mus musculus GTP binding protein 5 (Gtpbp5), transcript variant 1, mRNA [NM_181424]                                                                                                 | -0.33                | 0.004   | 0.137           | -0.31                 | 0.024   | 0.458           |
| ENSMUST00000075602                                      | ENSMUST00000075602 | ref PREDICTED: Mus musculus predicted gene, EG633752 (EG633752), mRNA [XM_980525]                                                                                                       | -0.34                | 0.004   | 0.137           | -0.48                 | 0.040   | 0.502           |
| Med29                                                   | NM_026042          | ref Mus musculus mediator complex subunit 29 (Med29), mRNA [NM_026042]                                                                                                                  | -0.36                | 0.004   | 0.137           | -0.39                 | 0.007   | 0.370           |
| Clstn2                                                  | NM_022319          | ref Mus musculus calyntenin 2 (Clstn2), mRNA [NM_022319]                                                                                                                                | -0.62                | 0.004   | 0.137           | -0.55                 | 0.014   | 0.414           |
| Cux2                                                    | NM_007804          | ref Mus musculus cut-like homeobox 2 (Cux2), mRNA [NM_007804]                                                                                                                           | -0.79                | 0.004   | 0.138           | -0.66                 | 0.027   | 0.473           |
| 2310003H01Rik                                           | NM_027980          | ref Mus musculus RIKEN cDNA 2310003H01 gene (2310003H01Rik), mRNA [NM_027980]                                                                                                           | -0.54                | 0.004   | 0.138           | -0.40                 | 0.020   | 0.443           |

| Online Supplemental Table IV: mG4H-STZ and Con-STZ Both |                          |                                                                                                                                                         |                      |         |                 |                       |         |                 |
|---------------------------------------------------------|--------------------------|---------------------------------------------------------------------------------------------------------------------------------------------------------|----------------------|---------|-----------------|-----------------------|---------|-----------------|
| Gene Symbol                                             | RefSeq                   | Description                                                                                                                                             | logFC<br>Con-<br>STZ | P-value | Adj.<br>P-value | logFC<br>mG4H-<br>STZ | P-value | Adj.<br>P-value |
| <b>chr6:28161665-28189840_F</b>                         | chr6:28161665-28189840_F | lincRNA:chr6:28161665-28189840 forward strand                                                                                                           | -0.69                | 0.004   | 0.139           | -0.57                 | 0.002   | 0.271           |
| <b>Coq4</b>                                             | NM_178693                | ref Mus musculus coenzyme Q4 homolog (yeast) (Coq4), nuclear gene encoding mitochondrial protein, mRNA [NM_178693]                                      | -0.35                | 0.004   | 0.139           | -0.26                 | 0.036   | 0.495           |
| <b>Nos2</b>                                             | NM_010927                | ref Mus musculus nitric oxide synthase 2, inducible (Nos2), mRNA [NM_010927]                                                                            | -0.34                | 0.004   | 0.140           | -0.42                 | 0.019   | 0.441           |
| <b>Mmaa</b>                                             | NM_133823                | ref Mus musculus methylmalonic aciduria (cobalamin deficiency) type A (Mmaa), nuclear gene encoding mitochondrial protein, mRNA [NM_133823]             | -0.30                | 0.004   | 0.140           | -0.36                 | 0.019   | 0.439           |
| <b>Gm7664</b>                                           | XM_981603                | ref PREDICTED: Mus musculus predicted gene, EG665503, transcript variant 2 (EG665503), mRNA [XM_981603]                                                 | -0.28                | 0.004   | 0.140           | -0.24                 | 0.014   | 0.412           |
| <b>Lman2l</b>                                           | NM_001013374             | ref Mus musculus lectin, mannose-binding 2-like (Lman2l), mRNA [NM_001013374]                                                                           | -0.31                | 0.004   | 0.140           | -0.38                 | 0.021   | 0.447           |
| <b>Pigo</b>                                             | NM_020035                | ref Mus musculus phosphatidylinositol glycan anchor biosynthesis, class O (Pigo), mRNA [NM_020035]                                                      | -0.44                | 0.004   | 0.140           | -0.31                 | 0.022   | 0.452           |
| <b>Timm50</b>                                           | NM_025616                | ref Mus musculus translocase of inner mitochondrial membrane 50 homolog (yeast) (Timm50), nuclear gene encoding mitochondrial protein, mRNA [NM_025616] | -0.34                | 0.004   | 0.140           | -0.30                 | 0.005   | 0.349           |
| <b>Arfrp1</b>                                           | NM_001165991             | ref Mus musculus ADP-ribosylation factor related protein 1 (Arfrp1), transcript variant 1, mRNA [NM_001165991]                                          | -0.40                | 0.004   | 0.141           | -0.35                 | 0.036   | 0.495           |
| <b>Trim7</b>                                            | NM_053166                | ref Mus musculus tripartite motif-containing 7 (Trim7), mRNA [NM_053166]                                                                                | -0.85                | 0.004   | 0.142           | -0.63                 | 0.002   | 0.259           |
| <b>Gdf1</b>                                             | NM_008107                | ref Mus musculus growth differentiation factor 1 (Gdf1), transcript variant 2, mRNA [NM_008107]                                                         | -0.48                | 0.004   | 0.142           | -0.55                 | 0.005   | 0.355           |
| <b>Tmem35</b>                                           | NM_026239                | ref Mus musculus transmembrane protein 35 (Tmem35), mRNA [NM_026239]                                                                                    | -0.56                | 0.004   | 0.142           | -0.36                 | 0.014   | 0.412           |
| <b>Sox4</b>                                             | ENSMUST00000067230       | ens SRY-box containing gene 4 Gene [Source:MGI (curated);Acc:MGI:98366] [ENSMUST00000067230]                                                            | -0.57                | 0.005   | 0.143           | -0.42                 | 0.013   | 0.412           |

Online Supplemental Table IV: mG4H-STZ and Con-STZ Both

| Gene Symbol               | RefSeq                    | Description                                                                                                                                                      | logFC<br>Con-<br>STZ | P-value | Adj.<br>P-value | logFC<br>mG4H-<br>STZ | P-value | Adj.<br>P-value |
|---------------------------|---------------------------|------------------------------------------------------------------------------------------------------------------------------------------------------------------|----------------------|---------|-----------------|-----------------------|---------|-----------------|
| P4ha2                     | NM_011031                 | ref Mus musculus procollagen-proline, 2-oxoglutarate 4-dioxygenase (proline 4-hydroxylase), alpha II polypeptide (P4ha2), transcript variant 2, mRNA [NM_011031] | -0.47                | 0.005   | 0.143           | -0.45                 | 0.004   | 0.330           |
| Csprs                     | NM_033616                 | ref Mus musculus component of Sp100-rs (Csprs), mRNA [NM_033616]                                                                                                 | -0.44                | 0.005   | 0.144           | -0.44                 | 0.029   | 0.477           |
| Snx16                     | NM_029068                 | ref Mus musculus sorting nexin 16 (Snx16), transcript variant 1, mRNA [NM_029068]                                                                                | -0.30                | 0.005   | 0.145           | -0.35                 | 0.035   | 0.494           |
| chr7:66574000-66577193_F  | chr7:66574000-66577193_F  | lincRNA:chr7:66574000-66577193 forward strand                                                                                                                    | -0.47                | 0.005   | 0.145           | -0.63                 | 0.006   | 0.361           |
| Mrpl41                    | NM_001031808              | ref Mus musculus mitochondrial ribosomal protein L41 (Mrpl41), nuclear gene encoding mitochondrial protein, mRNA [NM_001031808]                                  | -0.42                | 0.005   | 0.145           | -0.23                 | 0.037   | 0.496           |
| Prdx5                     | NM_012021                 | ref Mus musculus peroxiredoxin 5 (Prdx5), nuclear gene encoding mitochondrial protein, mRNA [NM_012021]                                                          | -0.31                | 0.005   | 0.145           | -0.22                 | 0.045   | 0.513           |
| Fam69a                    | NM_026062                 | ref Mus musculus family with sequence similarity 69, member A (Fam69a), mRNA [NM_026062]                                                                         | -0.34                | 0.005   | 0.145           | -0.26                 | 0.022   | 0.450           |
| Pitpnc1                   | NM_145823                 | ref Mus musculus phosphatidylinositol transfer protein, cytoplasmic 1 (Pitpnc1), mRNA [NM_145823]                                                                | -0.40                | 0.005   | 0.146           | -0.38                 | 0.006   | 0.369           |
| Gm11964                   | XM_979372                 | ref PREDICTED: Mus musculus similar to endothelial differentiation-related factor 1 (LOC665181), mRNA [XM_979372]                                                | -0.29                | 0.005   | 0.147           | -0.26                 | 0.018   | 0.435           |
| Fastk                     | NM_023229                 | ref Mus musculus Fas-activated serine/threonine kinase (Fastk), mRNA [NM_023229]                                                                                 | -0.36                | 0.005   | 0.147           | -0.33                 | 0.015   | 0.421           |
| Tob1                      | NM_009427                 | ref Mus musculus transducer of ErbB-2.1 (Tob1), mRNA [NM_009427]                                                                                                 | -0.29                | 0.005   | 0.147           | -0.25                 | 0.045   | 0.513           |
| Gm13713                   | XM_898561                 | ref PREDICTED: Mus musculus hypothetical LOC625033 (LOC625033), mRNA [XM_898561]                                                                                 | -0.60                | 0.005   | 0.147           | -0.81                 | 0.037   | 0.498           |
| chr16:13514223-13516070_R | chr16:13514223-13516070_R | lincRNA:chr16:13514223-13516070 reverse strand                                                                                                                   | -0.45                | 0.005   | 0.148           | -0.43                 | 0.011   | 0.407           |
| chr2:22782700-22801900_R  | chr2:22782700-22801900_R  | lincRNA:chr2:22782700-22801900 reverse strand                                                                                                                    | -0.60                | 0.005   | 0.148           | -0.58                 | 0.007   | 0.378           |

| Online Supplemental Table IV: mG4H-STZ and Con-STZ Both |                          |                                                                                                                                                              |                      |         |                 |                       |         |                 |
|---------------------------------------------------------|--------------------------|--------------------------------------------------------------------------------------------------------------------------------------------------------------|----------------------|---------|-----------------|-----------------------|---------|-----------------|
| Gene Symbol                                             | RefSeq                   | Description                                                                                                                                                  | logFC<br>Con-<br>STZ | P-value | Adj.<br>P-value | logFC<br>mG4H-<br>STZ | P-value | Adj.<br>P-value |
| Rangrf                                                  | NM_021329                | ref Mus musculus RAN guanine nucleotide release factor (Rangrf), mRNA [NM_021329]                                                                            | -0.41                | 0.005   | 0.149           | -0.42                 | 0.007   | 0.377           |
| Sirt3                                                   | NM_022433                | ref Mus musculus sirtuin 3 (silent mating type information regulation 2, homolog) 3 (S. cerevisiae) (Sirt3), transcript variant 1, mRNA [NM_022433]          | -0.39                | 0.005   | 0.149           | -0.25                 | 0.050   | 0.520           |
| Naa40                                                   | NM_027643                | ref Mus musculus N(alpha)-acetyltransferase 40, NatD catalytic subunit, homolog (S. cerevisiae) (Naa40), mRNA [NM_027643]                                    | -0.50                | 0.005   | 0.150           | -0.41                 | 0.048   | 0.516           |
| Cdc34                                                   | NM_177613                | ref Mus musculus cell division cycle 34 homolog (S. cerevisiae) (Cdc34), mRNA [NM_177613]                                                                    | -0.39                | 0.005   | 0.150           | -0.38                 | 0.024   | 0.459           |
| 1810058I24Rik                                           | AK082166                 | gb Mus musculus 0 day neonate cerebellum cDNA, RIKEN full-length enriched library, clone:C230016J21 product:unclassifiable, full insert sequence. [AK082166] | -0.46                | 0.005   | 0.151           | -0.34                 | 0.018   | 0.435           |
| Evl                                                     | NM_001163394             | ref Mus musculus Ena-vasodilator stimulated phosphoprotein (Evl), transcript variant 1, mRNA [NM_001163394]                                                  | -0.33                | 0.005   | 0.152           | -0.40                 | 0.018   | 0.437           |
| Mmab                                                    | NM_029956                | ref Mus musculus methylmalonic aciduria (cobalamin deficiency) type B homolog (human) (Mmab), nuclear gene encoding mitochondrial protein, mRNA [NM_029956]  | -0.49                | 0.005   | 0.152           | -0.47                 | 0.013   | 0.412           |
| Scd2                                                    | NM_009128                | ref Mus musculus stearyl-Coenzyme A desaturase 2 (Scd2), mRNA [NM_009128]                                                                                    | -0.33                | 0.005   | 0.152           | -0.22                 | 0.044   | 0.512           |
| Dynl12                                                  | NM_026556                | ref Mus musculus dynein light chain LC8-type 2 (Dynl12), transcript variant 1, mRNA [NM_026556]                                                              | -0.31                | 0.005   | 0.152           | -0.33                 | 0.016   | 0.426           |
| ENSMUST00000097608                                      | ENSMUST00000097608       | ens RIKEN cDNA 3222401L13 gene Gene [Source:MGI Symbol;Acc:MGI:2444186] [ENSMUST00000097608]                                                                 | -0.30                | 0.005   | 0.152           | -0.54                 | 0.012   | 0.408           |
| chr6:52046805-52072744_R                                | chr6:52046805-52072744_R | lincRNA:chr6:52046805-52072744 reverse strand                                                                                                                | -0.45                | 0.005   | 0.153           | -0.40                 | 0.031   | 0.481           |
| LOC640965                                               | ENSMUST00000112029       | ens killer cell lectin-like receptor subfamily A, member 11 Gene [Source:MGI Symbol;Acc:MGI:1321092] [ENSMUST00000112029]                                    | -0.73                | 0.005   | 0.153           | -0.72                 | 0.018   | 0.437           |



| Online Supplemental Table IV: mG4H-STZ and Con-STZ Both |                            |                                                                                                                                        |                      |         |                 |                       |         |                 |
|---------------------------------------------------------|----------------------------|----------------------------------------------------------------------------------------------------------------------------------------|----------------------|---------|-----------------|-----------------------|---------|-----------------|
| Gene Symbol                                             | RefSeq                     | Description                                                                                                                            | logFC<br>Con-<br>STZ | P-value | Adj.<br>P-value | logFC<br>mG4H-<br>STZ | P-value | Adj.<br>P-value |
| <b>ENSMUST00000025743</b>                               | ENSMUST00000025743         | ens mitochondrial ribosomal protein L21 Gene [Source:MGI (curated);Acc:MGI:2660674] [ENSMUST00000025743]                               | -0.31                | 0.005   | 0.154           | -0.33                 | 0.004   | 0.325           |
| <b>LOC100045652</b>                                     | XM_001474677               | ref PREDICTED: Mus musculus hypothetical protein LOC100045652 (LOC100045652), mRNA [XM_001474677]                                      | -0.37                | 0.005   | 0.154           | -0.40                 | 0.027   | 0.473           |
| <b>chr13:28477490-28985604_R</b>                        | chr13:28477490-28985604_R  | lincRNA:chr13:28477490-28985604 reverse strand                                                                                         | -0.90                | 0.005   | 0.154           | -0.53                 | 0.028   | 0.474           |
| <b>Grtp1</b>                                            | NM_025768                  | ref Mus musculus GH regulated TBC protein 1 (Grtp1), mRNA [NM_025768]                                                                  | -0.56                | 0.005   | 0.154           | -0.57                 | 0.012   | 0.411           |
| <b>Itga9</b>                                            | NM_133721                  | ref Mus musculus integrin alpha 9 (Itga9), transcript variant 1, mRNA [NM_133721]                                                      | -0.43                | 0.005   | 0.154           | -0.49                 | 0.031   | 0.482           |
| <b>Sybu</b>                                             | NM_176998                  | ref Mus musculus syntabulin (syntaxin-interacting) (Sybu), transcript variant a, mRNA [NM_176998]                                      | -0.78                | 0.005   | 0.154           | -0.50                 | 0.026   | 0.470           |
| <b>chrX:120300373-120302404_F</b>                       | chrX:120300373-120302404_F | lincRNA:chrX:120300373-120302404 forward strand                                                                                        | -0.45                | 0.005   | 0.154           | -0.49                 | 0.040   | 0.501           |
| <b>chr7:16633756-16634410_F</b>                         | chr7:16633756-16634410_F   | lincRNA:chr7:16633756-16634410 forward strand                                                                                          | -0.33                | 0.005   | 0.154           | -0.41                 | 0.031   | 0.483           |
| <b>Aplnr</b>                                            | NM_011784                  | ref Mus musculus apelin receptor (Aplnr), mRNA [NM_011784]                                                                             | -1.63                | 0.005   | 0.154           | -1.56                 | 0.022   | 0.450           |
| <b>Sub1</b>                                             | NM_011294                  | ref Mus musculus SUB1 homolog (S. cerevisiae) (Sub1), mRNA [NM_011294]                                                                 | -0.34                | 0.005   | 0.154           | -0.32                 | 0.049   | 0.519           |
| <b>Dot1l</b>                                            | NM_199322                  | ref Mus musculus DOT1-like, histone H3 methyltransferase (S. cerevisiae) (Dot1l), mRNA [NM_199322]                                     | -0.47                | 0.005   | 0.154           | -0.33                 | 0.027   | 0.471           |
| <b>Ccdc39</b>                                           | NM_026222                  | ref Mus musculus coiled-coil domain containing 39 (Ccdc39), mRNA [NM_026222]                                                           | -0.48                | 0.005   | 0.155           | -0.49                 | 0.017   | 0.432           |
| <b>MacroD2</b>                                          | NM_028387                  | ref Mus musculus MACRO domain containing 2 (MacroD2), transcript variant 2, mRNA [NM_028387]                                           | -0.45                | 0.005   | 0.155           | -0.36                 | 0.015   | 0.421           |
| <b>Acad8</b>                                            | NM_025862                  | ref Mus musculus acyl-Coenzyme A dehydrogenase family, member 8 (Acad8), nuclear gene encoding mitochondrial protein, mRNA [NM_025862] | -0.61                | 0.005   | 0.155           | -0.59                 | 0.020   | 0.443           |

| Online Supplemental Table IV: mG4H-STZ and Con-STZ Both |                           |                                                                                                                    |                      |         |                 |                       |         |                 |
|---------------------------------------------------------|---------------------------|--------------------------------------------------------------------------------------------------------------------|----------------------|---------|-----------------|-----------------------|---------|-----------------|
| Gene Symbol                                             | RefSeq                    | Description                                                                                                        | logFC<br>Con-<br>STZ | P-value | Adj.<br>P-value | logFC<br>mG4H-<br>STZ | P-value | Adj.<br>P-value |
| <b>Med19</b>                                            | NM_025885                 | ref Mus musculus mediator of RNA polymerase II transcription, subunit 19 homolog (yeast) (Med19), mRNA [NM_025885] | -0.41                | 0.006   | 0.156           | -0.29                 | 0.021   | 0.449           |
| <b>Sdr39u1</b>                                          | NM_001082975              | ref Mus musculus short chain dehydrogenase/reductase family 39U, member 1 (Sdr39u1), mRNA [NM_001082975]           | -0.28                | 0.006   | 0.156           | -0.22                 | 0.042   | 0.508           |
| <b>2410015M20Rik</b>                                    | NM_153152                 | ref Mus musculus RIKEN cDNA 2410015M20 gene (2410015M20Rik), mRNA [NM_153152]                                      | -0.30                | 0.006   | 0.156           | -0.27                 | 0.014   | 0.414           |
| <b>chr17:95255725-95272425_R</b>                        | chr17:95255725-95272425_R | lincRNA:chr17:95255725-95272425 reverse strand                                                                     | -0.36                | 0.006   | 0.157           | -0.25                 | 0.030   | 0.480           |
| <b>Hmgn2</b>                                            | NM_016957                 | ref Mus musculus high mobility group nucleosomal binding domain 2 (Hmgn2), mRNA [NM_016957]                        | -0.35                | 0.006   | 0.157           | -0.53                 | 0.032   | 0.485           |
| <b>2310002D06Rik</b>                                    | XM_899399                 | ref PREDICTED: Mus musculus RIKEN cDNA 2310002D06 gene (2310002D06Rik), mRNA [XM_899399]                           | -0.64                | 0.006   | 0.157           | -0.54                 | 0.048   | 0.518           |
| <b>Atxn7l1</b>                                          | NM_028139                 | ref Mus musculus ataxin 7-like 1 (Atxn7l1), transcript variant 2, mRNA [NM_028139]                                 | -0.32                | 0.006   | 0.157           | -0.44                 | 0.015   | 0.420           |
| <b>chr7:16633756-16634410_F</b>                         | chr7:16633756-16634410_F  | lincRNA:chr7:16633756-16634410 forward strand                                                                      | -0.38                | 0.006   | 0.157           | -0.38                 | 0.028   | 0.474           |
| <b>Tmtc4</b>                                            | NM_028651                 | ref Mus musculus transmembrane and tetratricopeptide repeat containing 4 (Tmtc4), mRNA [NM_028651]                 | -0.33                | 0.006   | 0.157           | -0.28                 | 0.049   | 0.519           |
| <b>Cxcr4</b>                                            | NM_009911                 | ref Mus musculus chemokine (C-X-C motif) receptor 4 (Cxcr4), mRNA [NM_009911]                                      | -0.59                | 0.006   | 0.157           | -0.68                 | 0.009   | 0.393           |
| <b>Tubg1</b>                                            | NM_134024                 | ref Mus musculus tubulin, gamma 1 (Tubg1), mRNA [NM_134024]                                                        | -0.36                | 0.006   | 0.159           | -0.27                 | 0.043   | 0.509           |
| <b>Slc16a4</b>                                          | NM_146136                 | ref Mus musculus solute carrier family 16 (monocarboxylic acid transporters), member 4 (Slc16a4), mRNA [NM_146136] | -0.45                | 0.006   | 0.159           | -0.51                 | 0.002   | 0.279           |
| <b>D3Bwg0562e</b>                                       | NM_177664                 | ref Mus musculus DNA segment, Chr 3, Brigham & Women's Genetics 0562 expressed (D3Bwg0562e), mRNA [NM_177664]      | -0.86                | 0.006   | 0.159           | -0.61                 | 0.044   | 0.512           |
| <b>Dffa</b>                                             | NM_010044                 | ref Mus musculus DNA fragmentation factor, alpha subunit (Dffa), transcript variant 2, mRNA [NM_010044]            | -0.41                | 0.006   | 0.159           | -0.29                 | 0.031   | 0.483           |

| Online Supplemental Table IV: mG4H-STZ and Con-STZ Both |                    |                                                                                                                              |                      |         |                 |                       |         |                 |
|---------------------------------------------------------|--------------------|------------------------------------------------------------------------------------------------------------------------------|----------------------|---------|-----------------|-----------------------|---------|-----------------|
| Gene Symbol                                             | RefSeq             | Description                                                                                                                  | logFC<br>Con-<br>STZ | P-value | Adj.<br>P-value | logFC<br>mG4H-<br>STZ | P-value | Adj.<br>P-value |
| <b>Ifitm7</b>                                           | ENSMUST00000090305 | ens interferon induced transmembrane protein 7 Gene [Source:MGI (curated);Acc:MGI:1921732] [ENSMUST00000090305]              | -0.43                | 0.006   | 0.160           | -0.50                 | 0.003   | 0.282           |
| <b>Tmem42</b>                                           | NM_025339          | ref Mus musculus transmembrane protein 42 (Tmem42), transcript variant 1, mRNA [NM_025339]                                   | -0.36                | 0.006   | 0.160           | -0.36                 | 0.010   | 0.404           |
| <b>Tmem41b</b>                                          | NM_153525          | ref Mus musculus transmembrane protein 41B (Tmem41b), mRNA [NM_153525]                                                       | -0.49                | 0.006   | 0.160           | -0.52                 | 0.003   | 0.281           |
| <b>Hrsp12</b>                                           | NM_008287          | ref Mus musculus heat-responsive protein 12 (Hrsp12), mRNA [NM_008287]                                                       | -0.32                | 0.006   | 0.160           | -0.36                 | 0.003   | 0.305           |
| <b>Nudt1</b>                                            | NM_008637          | ref Mus musculus nudix (nucleoside diphosphate linked moiety X)-type motif 1 (Nudt1), mRNA [NM_008637]                       | -0.33                | 0.006   | 0.161           | -0.41                 | 0.031   | 0.483           |
| <b>Lpar3</b>                                            | NM_022983          | ref Mus musculus lysophosphatidic acid receptor 3 (Lpar3), mRNA [NM_022983]                                                  | -0.56                | 0.006   | 0.161           | -0.55                 | 0.047   | 0.515           |
| <b>Sox7</b>                                             | NM_011446          | ref Mus musculus SRY-box containing gene 7 (Sox7), mRNA [NM_011446]                                                          | -0.42                | 0.006   | 0.161           | -0.56                 | 0.036   | 0.495           |
| <b>Mrpl49</b>                                           | NM_026246          | ref Mus musculus mitochondrial ribosomal protein L49 (Mrpl49), nuclear gene encoding mitochondrial protein, mRNA [NM_026246] | -0.38                | 0.006   | 0.161           | -0.46                 | 0.019   | 0.440           |
| <b>Pitpnc1</b>                                          | NM_145823          | ref Mus musculus phosphatidylinositol transfer protein, cytoplasmic 1 (Pitpnc1), mRNA [NM_145823]                            | -0.49                | 0.006   | 0.161           | -0.31                 | 0.043   | 0.509           |
| <b>ENSMUST00000113014</b>                               | ENSMUST00000113014 | ens microchidia 4 Gene [Source:MGI (curated);Acc:MGI:1922996] [ENSMUST00000113014]                                           | -0.35                | 0.006   | 0.163           | -0.41                 | 0.004   | 0.308           |
| <b>Gm6238</b>                                           | XM_887355          | ref PREDICTED: Mus musculus predicted gene, EG621542 (EG621542), mRNA [XM_887355]                                            | -0.27                | 0.006   | 0.163           | -0.22                 | 0.030   | 0.480           |
| <b>Gm6911</b>                                           | XM_893520          | ref PREDICTED: Mus musculus predicted gene, EG628747 (EG628747), mRNA [XM_893520]                                            | -0.44                | 0.006   | 0.164           | -0.35                 | 0.019   | 0.441           |
| <b>Hist1h4k</b>                                         | NM_178211          | ref Mus musculus histone cluster 1, H4k (Hist1h4k), mRNA [NM_178211]                                                         | -0.37                | 0.006   | 0.164           | -0.36                 | 0.016   | 0.425           |
| <b>Lrfn4</b>                                            | NM_153388          | ref Mus musculus leucine rich repeat and fibronectin type III domain containing 4 (Lrfn4), mRNA [NM_153388]                  | -0.61                | 0.006   | 0.164           | -0.56                 | 0.010   | 0.400           |

Online Supplemental Table IV: mG4H-STZ and Con-STZ Both

| Gene Symbol                      | RefSeq                    | Description                                                                                                                                             | logFC<br>Con-<br>STZ | P-value | Adj.<br>P-value | logFC<br>mG4H-<br>STZ | P-value | Adj.<br>P-value |
|----------------------------------|---------------------------|---------------------------------------------------------------------------------------------------------------------------------------------------------|----------------------|---------|-----------------|-----------------------|---------|-----------------|
| <b>AI596198</b>                  | CF617181                  | gb AGENCOURT_15763788 NIH_MGC_204 Mus musculus cDNA clone IMAGE:30526659 5', mRNA sequence [CF617181]                                                   | -0.69                | 0.006   | 0.164           | -0.96                 | 0.009   | 0.394           |
| <b>Gm7097</b>                    | XM_920293                 | ref PREDICTED: Mus musculus hypothetical LOC632955 (LOC632955), mRNA [XM_920293]                                                                        | -0.47                | 0.006   | 0.164           | -0.54                 | 0.034   | 0.493           |
| <b>Tmem93</b>                    | NM_025318                 | ref Mus musculus transmembrane protein 93 (Tmem93), transcript variant 2, mRNA [NM_025318]                                                              | -0.26                | 0.006   | 0.164           | -0.25                 | 0.031   | 0.482           |
| <b>Brwd1</b>                     | NM_176928                 | ref Mus musculus bromodomain and WD repeat domain containing 1 (Brwd1), transcript variant 3, mRNA [NM_176928]                                          | -0.31                | 0.006   | 0.165           | -0.29                 | 0.033   | 0.487           |
| <b>Hist4h4</b>                   | NM_175652                 | ref Mus musculus histone cluster 4, H4 (Hist4h4), mRNA [NM_175652]                                                                                      | -0.61                | 0.006   | 0.165           | -0.55                 | 0.002   | 0.261           |
| <b>Grpel1</b>                    | NM_024478                 | ref Mus musculus GrpE-like 1, mitochondrial (Grpel1), nuclear gene encoding mitochondrial protein, mRNA [NM_024478]                                     | -0.31                | 0.006   | 0.166           | -0.27                 | 0.010   | 0.403           |
| <b>chr10:74325583-74396665_R</b> | chr10:74325583-74396665_R | lincRNA:chr10:74325583-74396665 reverse strand                                                                                                          | -0.33                | 0.006   | 0.166           | -0.27                 | 0.021   | 0.448           |
| <b>C330006K01Rik</b>             | NM_172725                 | ref Mus musculus RIKEN cDNA C330006K01 gene (C330006K01Rik), mRNA [NM_172725]                                                                           | -0.34                | 0.006   | 0.166           | -0.45                 | 0.003   | 0.303           |
| <b>chr18:4415233-4415995_F</b>   | chr18:4415233-4415995_F   | lincRNA:chr18:4415233-4415995 forward strand                                                                                                            | -0.62                | 0.006   | 0.166           | -0.65                 | 0.017   | 0.433           |
| <b>Ddo</b>                       | NM_027442                 | ref Mus musculus D-aspartate oxidase (Ddo), mRNA [NM_027442]                                                                                            | -0.47                | 0.006   | 0.167           | -0.43                 | 0.014   | 0.414           |
| <b>Ccnh</b>                      | NM_023243                 | ref Mus musculus cyclin H (Ccnh), mRNA [NM_023243]                                                                                                      | -0.41                | 0.006   | 0.167           | -0.42                 | 0.014   | 0.414           |
| <b>6230415J03Rik</b>             | AK078026                  | gb Mus musculus 11 days embryo head cDNA, RIKEN full-length enriched library, clone:6230415J03 product:unclassifiable, full insert sequence. [AK078026] | -0.30                | 0.006   | 0.167           | -0.34                 | 0.011   | 0.407           |
| <b>Enho</b>                      | NM_027147                 | ref Mus musculus energy homeostasis associated (Enho), mRNA [NM_027147]                                                                                 | -0.42                | 0.006   | 0.168           | -0.51                 | 0.020   | 0.447           |
| <b>chr17:95255725-95272425_R</b> | chr17:95255725-95272425_R | lincRNA:chr17:95255725-95272425 reverse strand                                                                                                          | -0.30                | 0.006   | 0.168           | -0.24                 | 0.027   | 0.472           |

| Online Supplemental Table IV: mG4H-STZ and Con-STZ Both |                    |                                                                                                              |                      |         |                 |                       |         |                 |
|---------------------------------------------------------|--------------------|--------------------------------------------------------------------------------------------------------------|----------------------|---------|-----------------|-----------------------|---------|-----------------|
| Gene Symbol                                             | RefSeq             | Description                                                                                                  | logFC<br>Con-<br>STZ | P-value | Adj.<br>P-value | logFC<br>mG4H-<br>STZ | P-value | Adj.<br>P-value |
| Zfp536                                                  | NM_172385          | ref  Mus musculus zinc finger protein 536 (Zfp536), mRNA [NM_172385]                                         | -0.56                | 0.006   | 0.169           | -0.48                 | 0.009   | 0.400           |
| Rnf150                                                  | NM_177378          | ref  Mus musculus ring finger protein 150 (Rnf150), mRNA [NM_177378]                                         | -0.50                | 0.006   | 0.169           | -0.42                 | 0.019   | 0.441           |
| Acpp                                                    | NM_019807          | ref  Mus musculus acid phosphatase, prostate (Acpp), transcript variant 2, mRNA [NM_019807]                  | -0.50                | 0.006   | 0.170           | -0.78                 | 0.018   | 0.435           |
| Abcb9                                                   | NM_019875          | ref  Mus musculus ATP-binding cassette, sub-family B (MDR/TAP), member 9 (Abcb9), mRNA [NM_019875]           | -0.75                | 0.006   | 0.170           | -0.66                 | 0.036   | 0.495           |
| Gm3781                                                  | XM_001478003       | ref  PREDICTED: Mus musculus similar to pORF2 (LOC100042306), mRNA [XM_001478003]                            | -0.33                | 0.007   | 0.170           | -0.39                 | 0.011   | 0.407           |
| Cby1                                                    | NM_028634          | ref  Mus musculus chibby homolog 1 (Drosophila) (Cby1), mRNA [NM_028634]                                     | -0.33                | 0.007   | 0.171           | -0.24                 | 0.040   | 0.501           |
| Fam158a                                                 | NM_033146          | ref  Mus musculus family with sequence similarity 158, member A (Fam158a), mRNA [NM_033146]                  | -0.27                | 0.007   | 0.171           | -0.40                 | 0.019   | 0.441           |
| Rgs12                                                   | NM_173402          | ref  Mus musculus regulator of G-protein signaling 12 (Rgs12), transcript variant 1, mRNA [NM_173402]        | -0.32                | 0.007   | 0.171           | -0.25                 | 0.029   | 0.477           |
| Gm9481                                                  | XM_001474707       | ref  PREDICTED: Mus musculus similar to mitochondrial ribosomal protein L41 (LOC670250), mRNA [XM_001474707] | -0.28                | 0.007   | 0.171           | -0.28                 | 0.008   | 0.388           |
| Prlr                                                    | NM_011169          | ref  Mus musculus prolactin receptor (Prlr), mRNA [NM_011169]                                                | -1.15                | 0.007   | 0.172           | -0.77                 | 0.013   | 0.412           |
| ENSMUST00000103381                                      | ENSMUST00000103381 | gb  Mouse immunoglobulin variable region light chain (T5-626) mRNA. [X59193]                                 | -0.61                | 0.007   | 0.172           | -1.04                 | 0.007   | 0.374           |
| AI462493                                                | NM_001160356       | ref  Mus musculus expressed sequence AI462493 (AI462493), mRNA [NM_001160356]                                | -0.41                | 0.007   | 0.172           | -0.24                 | 0.022   | 0.452           |
| Hmgn2                                                   | NM_016957          | ref  Mus musculus high mobility group nucleosomal binding domain 2 (Hmgn2), mRNA [NM_016957]                 | -0.38                | 0.007   | 0.173           | -0.52                 | 0.050   | 0.520           |
| Ermn                                                    | NM_029972          | ref  Mus musculus ermin, ERM-like protein (Ermn), mRNA [NM_029972]                                           | -0.50                | 0.007   | 0.174           | -0.64                 | 0.014   | 0.414           |

Online Supplemental Table IV: mG4H-STZ and Con-STZ Both

| Gene Symbol                     | RefSeq                   | Description                                                                                                                                                                   | logFC<br>Con-<br>STZ | P-value | Adj.<br>P-value | logFC<br>mG4H-<br>STZ | P-value | Adj.<br>P-value |
|---------------------------------|--------------------------|-------------------------------------------------------------------------------------------------------------------------------------------------------------------------------|----------------------|---------|-----------------|-----------------------|---------|-----------------|
| <b>Timm22</b>                   | NM_019818                | ref Mus musculus translocase of inner mitochondrial membrane 22 homolog (yeast) (Timm22), nuclear gene encoding mitochondrial protein, transcript variant 1, mRNA [NM_019818] | -0.35                | 0.007   | 0.174           | -0.41                 | 0.022   | 0.452           |
| <b>chr2:84344350-84370075_R</b> | chr2:84344350-84370075_R | lincRNA:chr2:84344350-84370075 reverse strand                                                                                                                                 | -0.50                | 0.007   | 0.174           | -0.40                 | 0.022   | 0.451           |
| <b>Sh3bgr</b>                   | NM_015825                | ref Mus musculus SH3-binding domain glutamic acid-rich protein (Sh3bgr), mRNA [NM_015825]                                                                                     | -0.42                | 0.007   | 0.175           | -0.41                 | 0.002   | 0.266           |
| <b>Paqr7</b>                    | NM_027995                | ref Mus musculus progesterin and adipoQ receptor family member VII (Paqr7), mRNA [NM_027995]                                                                                  | -0.86                | 0.007   | 0.175           | -0.83                 | 0.003   | 0.285           |
| <b>Sgk3</b>                     | NM_133220                | ref Mus musculus serum/glucocorticoid regulated kinase 3 (Sgk3), transcript variant 1, mRNA [NM_133220]                                                                       | -0.29                | 0.007   | 0.176           | -0.25                 | 0.022   | 0.452           |
| <b>chr3:78982395-79094345_F</b> | chr3:78982395-79094345_F | lincRNA:chr3:78982395-79094345 forward strand                                                                                                                                 | -0.92                | 0.007   | 0.176           | -0.33                 | 0.013   | 0.412           |
| <b>Tmem147</b>                  | NM_027215                | ref Mus musculus transmembrane protein 147 (Tmem147), mRNA [NM_027215]                                                                                                        | -0.31                | 0.007   | 0.176           | -0.31                 | 0.008   | 0.391           |
| <b>Mrpl55</b>                   | NM_026035                | ref Mus musculus mitochondrial ribosomal protein L55 (Mrpl55), nuclear gene encoding mitochondrial protein, mRNA [NM_026035]                                                  | -0.43                | 0.007   | 0.176           | -0.31                 | 0.027   | 0.471           |
| <b>chr3:62895551-62896444_R</b> | chr3:62895551-62896444_R | lincRNA:chr3:62895551-62896444 reverse strand                                                                                                                                 | -0.57                | 0.007   | 0.176           | -0.36                 | 0.028   | 0.474           |
| <b>Atp1a2</b>                   | NM_178405                | ref Mus musculus ATPase, Na <sup>+</sup> /K <sup>+</sup> transporting, alpha 2 polypeptide (Atp1a2), mRNA [NM_178405]                                                         | -0.34                | 0.007   | 0.176           | -0.34                 | 0.019   | 0.441           |
| <b>Mtx2</b>                     | NM_016804                | ref Mus musculus metaxin 2 (Mtx2), nuclear gene encoding mitochondrial protein, mRNA [NM_016804]                                                                              | -0.27                | 0.007   | 0.176           | -0.23                 | 0.012   | 0.407           |
| <b>Slc6a17</b>                  | NM_172271                | ref Mus musculus solute carrier family 6 (neurotransmitter transporter), member 17 (Slc6a17), mRNA [NM_172271]                                                                | -0.54                | 0.007   | 0.177           | -0.32                 | 0.047   | 0.515           |
| <b>Pdss2</b>                    | NM_027772                | ref Mus musculus prenyl (solanesyl) diphosphate synthase, subunit 2 (Pdss2), transcript variant 1, mRNA [NM_027772]                                                           | -0.30                | 0.007   | 0.177           | -0.22                 | 0.035   | 0.495           |



| Online Supplemental Table IV: mG4H-STZ and Con-STZ Both |                           |                                                                                                                                                |                      |         |                 |                       |         |                 |
|---------------------------------------------------------|---------------------------|------------------------------------------------------------------------------------------------------------------------------------------------|----------------------|---------|-----------------|-----------------------|---------|-----------------|
| Gene Symbol                                             | RefSeq                    | Description                                                                                                                                    | logFC<br>Con-<br>STZ | P-value | Adj.<br>P-value | logFC<br>mG4H-<br>STZ | P-value | Adj.<br>P-value |
| chr15:8463685-8494960_R                                 | chr15:8463685-8494960_R   | lincRNA:chr15:8463685-8494960 reverse strand                                                                                                   | -0.36                | 0.007   | 0.177           | -0.27                 | 0.050   | 0.520           |
| chr16:90008636-90015586_R                               | chr16:90008636-90015586_R | lincRNA:chr16:90008636-90015586 reverse strand                                                                                                 | -0.79                | 0.007   | 0.177           | -0.98                 | 0.016   | 0.425           |
| Pkd2l2                                                  | NM_016927                 | ref Mus musculus polycystic kidney disease 2-like 2 (Pkd2l2), transcript variant 1, mRNA [NM_016927]                                           | -0.63                | 0.007   | 0.177           | -0.73                 | 0.016   | 0.426           |
| Gm9480                                                  | XR_031690                 | ref PREDICTED: Mus musculus similar to Ac2-008 (LOC670100), misc RNA [XR_031690]                                                               | -0.47                | 0.007   | 0.177           | -0.73                 | 0.008   | 0.389           |
| ENSMUST00000110340                                      | ENSMUST00000110340        | ens COX16 cytochrome c oxidase assembly homolog (S. cerevisiae) Gene [Source:MGI Symbol;Acc:MGI:1913522] [ENSMUST00000110340]                  | -0.26                | 0.007   | 0.178           | -0.30                 | 0.009   | 0.397           |
| Ccdc66                                                  | NM_177111                 | ref Mus musculus coiled-coil domain containing 66 (Ccdc66), mRNA [NM_177111]                                                                   | -0.31                | 0.007   | 0.178           | -0.34                 | 0.020   | 0.443           |
| Smarcd3                                                 | NM_025891                 | ref Mus musculus SWI/SNF related, matrix associated, actin dependent regulator of chromatin, subfamily d, member 3 (Smarcd3), mRNA [NM_025891] | -0.30                | 0.007   | 0.178           | -0.25                 | 0.030   | 0.480           |
| LOC637711                                               | XM_913466                 | ref PREDICTED: Mus musculus similar to mevalonate kinase (LOC637711), mRNA [XM_913466]                                                         | -0.38                | 0.007   | 0.178           | -0.35                 | 0.007   | 0.370           |
| Blvra                                                   | NM_026678                 | ref Mus musculus biliverdin reductase A (Blvra), mRNA [NM_026678]                                                                              | -0.26                | 0.007   | 0.179           | -0.22                 | 0.040   | 0.501           |
| Kit                                                     | NM_001122733              | ref Mus musculus kit oncogene (Kit), transcript variant 1, mRNA [NM_001122733]                                                                 | -0.69                | 0.007   | 0.179           | -0.91                 | 0.004   | 0.325           |
| Epb4.1l3                                                | NM_013813                 | ref Mus musculus erythrocyte protein band 4.1-like 3 (Epb4.1l3), mRNA [NM_013813]                                                              | -0.43                | 0.007   | 0.179           | -0.44                 | 0.015   | 0.418           |
| 2510049J12Rik                                           | NM_001101431              | ref Mus musculus RIKEN cDNA 2510049J12 gene (2510049J12Rik), mRNA [NM_001101431]                                                               | -0.56                | 0.007   | 0.179           | -0.62                 | 0.024   | 0.463           |
| Zfp809                                                  | NM_172763                 | ref Mus musculus zinc finger protein 809 (Zfp809), transcript variant 1, mRNA [NM_172763]                                                      | -0.30                | 0.007   | 0.179           | -0.39                 | 0.020   | 0.447           |
| Phyhip                                                  | NM_145981                 | ref Mus musculus phytanoyl-CoA hydroxylase interacting protein (Phyhip), mRNA [NM_145981]                                                      | -0.68                | 0.007   | 0.179           | -0.59                 | 0.026   | 0.470           |
| Ldoc1l                                                  | NM_177630                 | ref Mus musculus leucine zipper, down-regulated in cancer 1-like (Ldoc1l), mRNA [NM_177630]                                                    | -0.36                | 0.007   | 0.179           | -0.53                 | 0.028   | 0.474           |

| Online Supplemental Table IV: mG4H-STZ and Con-STZ Both |                    |                                                                                                                                                                |                      |         |                 |                       |         |                 |
|---------------------------------------------------------|--------------------|----------------------------------------------------------------------------------------------------------------------------------------------------------------|----------------------|---------|-----------------|-----------------------|---------|-----------------|
| Gene Symbol                                             | RefSeq             | Description                                                                                                                                                    | logFC<br>Con-<br>STZ | P-value | Adj.<br>P-value | logFC<br>mG4H-<br>STZ | P-value | Adj.<br>P-value |
| <b>ENSMUST00000031305</b>                               | ENSMUST00000031305 | ens Putative uncharacterized protein [Source:UniProtKB/TrEMBL;Acc:Q9D5H7] [ENSMUST00000031305]                                                                 | -1.62                | 0.007   | 0.179           | -1.18                 | 0.002   | 0.280           |
| <b>Ttc17</b>                                            | NM_183106          | ref Mus musculus tetratricopeptide repeat domain 17 (Ttc17), mRNA [NM_183106]                                                                                  | -0.34                | 0.007   | 0.180           | -0.30                 | 0.022   | 0.452           |
| <b>Reep1</b>                                            | NM_178608          | ref Mus musculus receptor accessory protein 1 (Reep1), nuclear gene encoding mitochondrial protein, mRNA [NM_178608]                                           | -0.98                | 0.007   | 0.180           | -1.00                 | 0.005   | 0.346           |
| <b>Rnls</b>                                             | NM_001167818       | ref Mus musculus renalase, FAD-dependent amine oxidase (Rnls), transcript variant 1, mRNA [NM_001167818]                                                       | -0.33                | 0.007   | 0.181           | -0.37                 | 0.005   | 0.342           |
| <b>Ndutf3</b>                                           | NM_023247          | ref Mus musculus NADH dehydrogenase (ubiquinone) 1 alpha subcomplex, assembly factor 3 (Ndutf3), nuclear gene encoding mitochondrial protein, mRNA [NM_023247] | -0.54                | 0.007   | 0.181           | -0.23                 | 0.047   | 0.515           |
| <b>Gpr22</b>                                            | NM_175191          | ref Mus musculus G protein-coupled receptor 22 (Gpr22), mRNA [NM_175191]                                                                                       | -0.76                | 0.007   | 0.181           | -0.56                 | 0.011   | 0.406           |
| <b>Gm11383</b>                                          | XR_001895          | ref PREDICTED: Mus musculus similar to prohibitin (LOC628301), misc RNA [XR_001895]                                                                            | -0.35                | 0.007   | 0.181           | -0.34                 | 0.010   | 0.403           |
| <b>Gm6434</b>                                           | XM_887930          | ref PREDICTED: Mus musculus predicted gene, EG623475 (EG623475), mRNA [XM_887930]                                                                              | -0.28                | 0.007   | 0.181           | -0.25                 | 0.024   | 0.458           |
| <b>Igsf1</b>                                            | NM_177591          | ref Mus musculus immunoglobulin superfamily, member 1 (Igsf1), transcript variant 1, mRNA [NM_177591]                                                          | -0.54                | 0.007   | 0.181           | -0.71                 | 0.015   | 0.421           |
| <b>Egln3</b>                                            | NM_028133          | ref Mus musculus EGL nine homolog 3 (C. elegans) (Egln3), mRNA [NM_028133]                                                                                     | -0.70                | 0.007   | 0.182           | -0.53                 | 0.035   | 0.495           |
| <b>Bola3</b>                                            | NM_175277          | ref Mus musculus bolA-like 3 (E. coli) (Bola3), mRNA [NM_175277]                                                                                               | -0.64                | 0.007   | 0.182           | -0.27                 | 0.027   | 0.472           |
| <b>LOC100044526</b>                                     | XR_030656          | ref PREDICTED: Mus musculus similar to mitochondrial ribosomal protein S14 (LOC100044526), misc RNA [XR_030656]                                                | -0.28                | 0.007   | 0.183           | -0.30                 | 0.013   | 0.412           |
| <b>Tnfrsf17</b>                                         | NM_011608          | ref Mus musculus tumor necrosis factor receptor superfamily, member 17 (Tnfrsf17), mRNA [NM_011608]                                                            | -0.55                | 0.008   | 0.183           | -0.68                 | 0.007   | 0.380           |
| <b>Aadat</b>                                            | NM_011834          | ref Mus musculus amino adipate aminotransferase (Aadat), mRNA [NM_011834]                                                                                      | -0.41                | 0.008   | 0.183           | -0.28                 | 0.048   | 0.516           |

Online Supplemental Table IV: mG4H-STZ and Con-STZ Both

| Gene Symbol                       | RefSeq                     | Description                                                                                                                                             | logFC<br>Con-<br>STZ | P-value | Adj.<br>P-value | logFC<br>mG4H-<br>STZ | P-value | Adj.<br>P-value |
|-----------------------------------|----------------------------|---------------------------------------------------------------------------------------------------------------------------------------------------------|----------------------|---------|-----------------|-----------------------|---------|-----------------|
| <b>Fam57b</b>                     | NM_026884                  | ref Mus musculus family with sequence similarity 57, member B (Fam57b), transcript variant 2, mRNA [NM_026884]                                          | -0.40                | 0.008   | 0.183           | -0.33                 | 0.031   | 0.480           |
| <b>Gm2679</b>                     | XM_001474360               | ref PREDICTED: Mus musculus hypothetical protein LOC100040253 (LOC100040253), mRNA [XM_001474360]                                                       | -0.53                | 0.008   | 0.183           | -0.88                 | 0.002   | 0.281           |
| <b>chr1:135956616-135957485_R</b> | chr1:135956616-135957485_R | lincRNA:chr1:135956616-135957485 reverse strand                                                                                                         | -0.58                | 0.008   | 0.184           | -0.39                 | 0.034   | 0.493           |
| <b>Gm5825</b>                     | XM_001473555               | ref PREDICTED: Mus musculus similar to Translocase of inner mitochondrial membrane 23 homolog (yeast) (LOC545270), mRNA [XM_001473555]                  | -0.27                | 0.008   | 0.184           | -0.22                 | 0.024   | 0.459           |
| <b>Nat8b</b>                      | XM_485799                  | ref PREDICTED: Mus musculus predicted gene, EG434057 (EG434057), mRNA [XM_485799]                                                                       | -0.32                | 0.008   | 0.184           | -0.42                 | 0.021   | 0.449           |
| <b>Gm6594</b>                     | XM_890094                  | ref PREDICTED: Mus musculus predicted gene, EG625514 (EG625514), mRNA [XM_890094]                                                                       | -0.32                | 0.008   | 0.184           | -0.52                 | 0.039   | 0.501           |
| <b>Mrps36</b>                     | NM_025369                  | ref Mus musculus mitochondrial ribosomal protein S36 (Mrps36), nuclear gene encoding mitochondrial protein, transcript variant 1, mRNA [NM_025369]      | -0.43                | 0.008   | 0.185           | -0.28                 | 0.029   | 0.477           |
| <b>Mrps22</b>                     | NM_025485                  | ref Mus musculus mitochondrial ribosomal protein S22 (Mrps22), nuclear gene encoding mitochondrial protein, mRNA [NM_025485]                            | -0.32                | 0.008   | 0.186           | -0.24                 | 0.018   | 0.437           |
| <b>Gm6651</b>                     | XR_032823                  | ref PREDICTED: Mus musculus similar to high mobility group nucleosomal binding domain 2 (LOC626075), misc RNA [XR_032823]                               | -0.33                | 0.008   | 0.186           | -0.48                 | 0.017   | 0.431           |
| <b>chr6:128393530-128394127_F</b> | chr6:128393530-128394127_F | lincRNA:chr6:128393530-128394127 forward strand                                                                                                         | -0.45                | 0.008   | 0.187           | -0.55                 | 0.013   | 0.412           |
| <b>1810046J19Rik</b>              | NM_025559                  | ref Mus musculus RIKEN cDNA 1810046J19 gene (1810046J19Rik), mRNA [NM_025559]                                                                           | -0.33                | 0.008   | 0.187           | -0.44                 | 0.006   | 0.366           |
| <b>Tomm22</b>                     | NM_172609                  | ref Mus musculus translocase of outer mitochondrial membrane 22 homolog (yeast) (Tomm22), nuclear gene encoding mitochondrial protein, mRNA [NM_172609] | -0.31                | 0.008   | 0.187           | -0.28                 | 0.027   | 0.472           |

| Online Supplemental Table IV: mG4H-STZ and Con-STZ Both |                           |                                                                                                                                                                                |                      |         |                 |                       |         |                 |
|---------------------------------------------------------|---------------------------|--------------------------------------------------------------------------------------------------------------------------------------------------------------------------------|----------------------|---------|-----------------|-----------------------|---------|-----------------|
| Gene Symbol                                             | RefSeq                    | Description                                                                                                                                                                    | logFC<br>Con-<br>STZ | P-value | Adj.<br>P-value | logFC<br>mG4H-<br>STZ | P-value | Adj.<br>P-value |
| <b>Prrx1</b>                                            | NM_175686                 | ref Mus musculus paired related homeobox 1 (Prrx1), transcript variant 2, mRNA [NM_175686]                                                                                     | -0.46                | 0.008   | 0.188           | -0.39                 | 0.018   | 0.437           |
| <b>Mrpl3</b>                                            | NM_053159                 | ref Mus musculus mitochondrial ribosomal protein L3 (Mrpl3), nuclear gene encoding mitochondrial protein, mRNA [NM_053159]                                                     | -0.37                | 0.008   | 0.188           | -0.30                 | 0.037   | 0.497           |
| <b>Hrasls</b>                                           | NM_013751                 | ref Mus musculus HRAS-like suppressor (Hrasls), mRNA [NM_013751]                                                                                                               | -0.49                | 0.008   | 0.189           | -0.62                 | 0.024   | 0.463           |
| <b>chr13:23517278-23523756_F</b>                        | chr13:23517278-23523756_F | lincRNA:chr13:23517278-23523756 forward strand                                                                                                                                 | -0.38                | 0.008   | 0.190           | -0.67                 | 0.002   | 0.273           |
| <b>C79246</b>                                           | C79246                    | gb C79246 Mouse 3.5-dpc blastocyst cDNA Mus musculus cDNA clone J0063B08 3' similar to Genomic sequence from Mouse 4; HTGS phase 3. [C79246]                                   | -0.43                | 0.008   | 0.190           | -0.29                 | 0.050   | 0.520           |
| <b>Lenep</b>                                            | NM_020517                 | ref Mus musculus lens epithelial protein (Lenep), mRNA [NM_020517]                                                                                                             | -0.40                | 0.008   | 0.191           | -0.47                 | 0.014   | 0.412           |
| <b>Tomm5</b>                                            | NM_001134646              | ref Mus musculus translocase of outer mitochondrial membrane 5 homolog (yeast) (Tomm5), nuclear gene encoding mitochondrial protein, transcript variant 2, mRNA [NM_001134646] | -0.37                | 0.008   | 0.191           | -0.42                 | 0.022   | 0.452           |
| <b>A130042E20Rik</b>                                    | NM_172550                 | ref Mus musculus RIKEN cDNA A130042E20 gene (A130042E20Rik), mRNA [NM_172550]                                                                                                  | -0.36                | 0.008   | 0.191           | -0.53                 | 0.024   | 0.461           |
| <b>chr18:23922600-23937275_R</b>                        | chr18:23922600-23937275_R | lincRNA:chr18:23922600-23937275 reverse strand                                                                                                                                 | -0.69                | 0.008   | 0.191           | -0.68                 | 0.007   | 0.375           |
| <b>Bola3</b>                                            | NM_175277                 | ref Mus musculus bolA-like 3 (E. coli) (Bola3), mRNA [NM_175277]                                                                                                               | -0.34                | 0.008   | 0.191           | -0.25                 | 0.036   | 0.495           |
| <b>Gm4759</b>                                           | NR_003967                 | ref Mus musculus predicted gene 4759 (Gm4759), non-coding RNA [NR_003967]                                                                                                      | -0.57                | 0.008   | 0.191           | -0.42                 | 0.046   | 0.513           |
| <b>Ftsj2</b>                                            | NM_026510                 | ref Mus musculus FtsJ homolog 2 (E. coli) (Ftsj2), mRNA [NM_026510]                                                                                                            | -0.55                | 0.008   | 0.192           | -0.51                 | 0.017   | 0.434           |
| <b>Mrps33</b>                                           | NM_001010930              | ref Mus musculus mitochondrial ribosomal protein S33 (Mrps33), nuclear gene encoding mitochondrial protein, transcript variant 2, mRNA [NM_001010930]                          | -0.33                | 0.008   | 0.192           | -0.30                 | 0.013   | 0.412           |

Online Supplemental Table IV: mG4H-STZ and Con-STZ Both

| Gene Symbol                     | RefSeq                   | Description                                                                                                                                   | logFC<br>Con-<br>STZ | P-value | Adj.<br>P-value | logFC<br>mG4H-<br>STZ | P-value | Adj.<br>P-value |
|---------------------------------|--------------------------|-----------------------------------------------------------------------------------------------------------------------------------------------|----------------------|---------|-----------------|-----------------------|---------|-----------------|
| <b>LOC100046032</b>             | XM_001475430             | ref PREDICTED: Mus musculus similar to brain-2 class III POU-domain protein (LOC100046032), mRNA [XM_001475430]                               | -0.61                | 0.008   | 0.192           | -0.32                 | 0.047   | 0.515           |
| <b>Mrpl39</b>                   | ENSMUST00000023607       | ens mitochondrial ribosomal protein L39 Gene [Source:MGI (curated);Acc:MGI:1351620] [ENSMUST00000023607]                                      | -0.39                | 0.008   | 0.193           | -0.58                 | 0.001   | 0.246           |
| <b>Lrat</b>                     | NM_023624                | ref Mus musculus lecithin-retinol acyltransferase (phosphatidylcholine-retinol-O-acyltransferase) (Lrat), mRNA [NM_023624]                    | -0.46                | 0.008   | 0.193           | -0.41                 | 0.042   | 0.507           |
| <b>Clec1b</b>                   | NM_019985                | ref Mus musculus C-type lectin domain family 1, member b (Clec1b), mRNA [NM_019985]                                                           | -0.59                | 0.008   | 0.194           | -0.44                 | 0.024   | 0.462           |
| <b>Grpel2</b>                   | NM_021296                | ref Mus musculus GrpE-like 2, mitochondrial (Grpel2), nuclear gene encoding mitochondrial protein, mRNA [NM_021296]                           | -0.26                | 0.008   | 0.194           | -0.22                 | 0.029   | 0.477           |
| <b>Gm11222</b>                  | XR_031539                | ref PREDICTED: Mus musculus similar to ribosomal protein L7-like 1 (LOC433716), misc RNA [XR_031539]                                          | -0.25                | 0.008   | 0.195           | -0.26                 | 0.013   | 0.412           |
| <b>Hist1h2bc</b>                | NM_023422                | ref Mus musculus histone cluster 1, H2bc (Hist1h2bc), mRNA [NM_023422]                                                                        | -0.64                | 0.009   | 0.195           | -0.30                 | 0.014   | 0.414           |
| <b>Gadd45gip1</b>               | NM_183358                | ref Mus musculus growth arrest and DNA-damage-inducible, gamma interacting protein 1 (Gadd45gip1), mRNA [NM_183358]                           | -0.27                | 0.009   | 0.196           | -0.23                 | 0.032   | 0.485           |
| <b>chr9:88575075-88611650_F</b> | chr9:88575075-88611650_F | lincRNA:chr9:88575075-88611650 forward strand                                                                                                 | -0.35                | 0.009   | 0.196           | -0.26                 | 0.029   | 0.477           |
| <b>chr8:74820025-74833350_F</b> | chr8:74820025-74833350_F | lincRNA:chr8:74820025-74833350 forward strand                                                                                                 | -0.35                | 0.009   | 0.197           | -0.56                 | 0.014   | 0.414           |
| <b>2810422O20Rik</b>            | NM_027279                | ref Mus musculus RIKEN cDNA 2810422O20 gene (2810422O20Rik), mRNA [NM_027279]                                                                 | -0.30                | 0.009   | 0.198           | -0.33                 | 0.045   | 0.513           |
| <b>Slc5a6</b>                   | NM_001177621             | ref Mus musculus solute carrier family 5 (sodium-dependent vitamin transporter), member 6 (Slc5a6), transcript variant 1, mRNA [NM_001177621] | -0.47                | 0.009   | 0.198           | -0.32                 | 0.026   | 0.470           |
| <b>ENSMUST00000099440</b>       | ENSMUST00000099440       | ens RIKEN cDNA 1810034E14 gene Gene [Source:MGI Symbol;Acc:MGI:1913753] [ENSMUST00000099440]                                                  | -0.80                | 0.009   | 0.198           | -0.85                 | 0.001   | 0.185           |

| Online Supplemental Table IV: mG4H-STZ and Con-STZ Both |                           |                                                                                                                                                               |                      |         |                 |                       |         |                 |
|---------------------------------------------------------|---------------------------|---------------------------------------------------------------------------------------------------------------------------------------------------------------|----------------------|---------|-----------------|-----------------------|---------|-----------------|
| Gene Symbol                                             | RefSeq                    | Description                                                                                                                                                   | logFC<br>Con-<br>STZ | P-value | Adj.<br>P-value | logFC<br>mG4H-<br>STZ | P-value | Adj.<br>P-value |
| <b>Gprasp2</b>                                          | NM_001163015              | ref Mus musculus G protein-coupled receptor associated sorting protein 2 (Gprasp2), transcript variant 1, mRNA [NM_001163015]                                 | -0.53                | 0.009   | 0.199           | -0.51                 | 0.041   | 0.505           |
| <b>1190007I07Rik</b>                                    | NM_001135567              | ref Mus musculus RIKEN cDNA 1190007I07 gene (1190007I07Rik), transcript variant 1, mRNA [NM_001135567]                                                        | -0.40                | 0.009   | 0.199           | -0.54                 | 0.021   | 0.448           |
| <b>Gm7250</b>                                           | XM_001479700              | ref PREDICTED: Mus musculus similar to TOM22 protein (LOC638791), mRNA [XM_001479700]                                                                         | -0.29                | 0.009   | 0.199           | -0.28                 | 0.030   | 0.480           |
| <b>Ndufs4</b>                                           | NM_010887                 | ref Mus musculus NADH dehydrogenase (ubiquinone) Fe-S protein 4 (Ndufs4), nuclear gene encoding mitochondrial protein, mRNA [NM_010887]                       | -0.30                | 0.009   | 0.199           | -0.25                 | 0.041   | 0.505           |
| <b>Snn</b>                                              | NM_009223                 | ref Mus musculus stannin (Snn), mRNA [NM_009223]                                                                                                              | -0.28                | 0.009   | 0.199           | -0.34                 | 0.012   | 0.412           |
| <b>chr13:28477490-28985604_R</b>                        | chr13:28477490-28985604_R | lincRNA:chr13:28477490-28985604 reverse strand                                                                                                                | -0.45                | 0.009   | 0.199           | -0.40                 | 0.017   | 0.429           |
| <b>Bex6</b>                                             | NM_001033539              | ref Mus musculus brain expressed gene 6 (Bex6), mRNA [NM_001033539]                                                                                           | -0.31                | 0.009   | 0.199           | -0.51                 | 0.005   | 0.342           |
| <b>Vmn1r86</b>                                          | NM_001167536              | ref Mus musculus vomeronasal 1 receptor 86 (Vmn1r86), mRNA [NM_001167536]                                                                                     | -0.45                | 0.009   | 0.200           | -0.38                 | 0.034   | 0.493           |
| <b>1700031A10Rik</b>                                    | AK006574                  | gb Mus musculus adult male testis cDNA, RIKEN full-length enriched library, clone:1700031A10 product:ring finger protein 39, full insert sequence. [AK006574] | -0.42                | 0.009   | 0.200           | -0.41                 | 0.011   | 0.406           |
| <b>Dlgap3</b>                                           | NM_198618                 | ref Mus musculus discs, large (Drosophila) homolog-associated protein 3 (Dlgap3), mRNA [NM_198618]                                                            | -0.35                | 0.009   | 0.200           | -0.41                 | 0.007   | 0.384           |
| <b>Tspan7</b>                                           | NM_019634                 | ref Mus musculus tetraspanin 7 (Tspan7), mRNA [NM_019634]                                                                                                     | -0.28                | 0.009   | 0.201           | -0.27                 | 0.031   | 0.482           |
| <b>C030030A07Rik</b>                                    | NM_001039558              | ref Mus musculus RIKEN cDNA C030030A07 gene (C030030A07Rik), mRNA [NM_001039558]                                                                              | -0.70                | 0.009   | 0.201           | -1.29                 | 0.042   | 0.508           |
| <b>Smap2</b>                                            | NM_133716                 | ref Mus musculus stromal membrane-associated GTPase-activating protein 2 (Smap2), mRNA [NM_133716]                                                            | -0.32                | 0.009   | 0.201           | -0.23                 | 0.047   | 0.515           |
| <b>Cryl1</b>                                            | NM_030004                 | ref Mus musculus crystallin, lambda 1 (Cryl1), mRNA [NM_030004]                                                                                               | -0.30                | 0.009   | 0.201           | -0.45                 | 0.011   | 0.407           |
| <b>Ptchd3</b>                                           | NM_029049                 | ref Mus musculus patched domain containing 3 (Ptchd3), mRNA [NM_029049]                                                                                       | -0.41                | 0.009   | 0.201           | -0.47                 | 0.017   | 0.433           |



| Online Supplemental Table IV: mG4H-STZ and Con-STZ Both |              |                                                                                                                                         |                      |         |                 |                       |         |                 |
|---------------------------------------------------------|--------------|-----------------------------------------------------------------------------------------------------------------------------------------|----------------------|---------|-----------------|-----------------------|---------|-----------------|
| Gene Symbol                                             | RefSeq       | Description                                                                                                                             | logFC<br>Con-<br>STZ | P-value | Adj.<br>P-value | logFC<br>mG4H-<br>STZ | P-value | Adj.<br>P-value |
| <b>Lipt1</b>                                            | NM_001037918 | ref Mus musculus lipoyltransferase 1 (Lipt1), nuclear gene encoding mitochondrial protein, mRNA [NM_001037918]                          | -0.29                | 0.009   | 0.202           | -0.23                 | 0.029   | 0.477           |
| <b>Dut</b>                                              | NM_023595    | ref Mus musculus deoxyuridine triphosphatase (Dut), nuclear gene encoding mitochondrial protein, transcript variant 2, mRNA [NM_023595] | -0.43                | 0.009   | 0.202           | -0.56                 | 0.015   | 0.420           |
| <b>Bcas2</b>                                            | NM_026602    | ref Mus musculus breast carcinoma amplified sequence 2 (Bcas2), mRNA [NM_026602]                                                        | -0.25                | 0.009   | 0.202           | -0.27                 | 0.012   | 0.408           |
| <b>Stip1</b>                                            | NM_016737    | ref Mus musculus stress-induced phosphoprotein 1 (Stip1), mRNA [NM_016737]                                                              | -0.25                | 0.009   | 0.202           | -0.20                 | 0.037   | 0.496           |
| <b>2310042D19Rik</b>                                    | NM_172417    | ref Mus musculus RIKEN cDNA 2310042D19 gene (2310042D19Rik), mRNA [NM_172417]                                                           | -0.40                | 0.009   | 0.204           | -0.34                 | 0.037   | 0.496           |
| <b>Slitrk6</b>                                          | NM_175499    | ref Mus musculus SLIT and NTRK-like family, member 6 (Slitrk6), mRNA [NM_175499]                                                        | -0.69                | 0.009   | 0.204           | -0.78                 | 0.002   | 0.266           |
| <b>Unc13d</b>                                           | NM_001009573 | ref Mus musculus unc-13 homolog D (C. elegans) (Unc13d), mRNA [NM_001009573]                                                            | -0.30                | 0.009   | 0.204           | -0.22                 | 0.033   | 0.487           |
| <b>Spryd4</b>                                           | NM_025716    | ref Mus musculus SPRY domain containing 4 (Spryd4), mRNA [NM_025716]                                                                    | -0.45                | 0.009   | 0.205           | -0.35                 | 0.041   | 0.506           |
| <b>Gm5086</b>                                           | XM_488691    | ref PREDICTED: Mus musculus predicted gene, EG328314 (EG328314), mRNA [XM_488691]                                                       | -0.54                | 0.009   | 0.206           | -0.55                 | 0.048   | 0.516           |
| <b>Syt3</b>                                             | NM_016663    | ref Mus musculus synaptotagmin III (Syt3), transcript variant 1, mRNA [NM_016663]                                                       | -0.45                | 0.010   | 0.207           | -0.32                 | 0.027   | 0.471           |
| <b>Bhlha15</b>                                          | NM_010800    | ref Mus musculus basic helix-loop-helix family, member a15 (Bhlha15), mRNA [NM_010800]                                                  | -0.42                | 0.010   | 0.207           | -0.51                 | 0.014   | 0.412           |
| <b>Rnase6</b>                                           | NM_030098    | ref Mus musculus ribonuclease, RNase A family, 6 (Rnase6), mRNA [NM_030098]                                                             | -0.57                | 0.010   | 0.207           | -0.53                 | 0.023   | 0.454           |
| <b>Def8</b>                                             | NM_054046    | ref Mus musculus differentially expressed in FDCP 8 (Def8), mRNA [NM_054046]                                                            | -0.34                | 0.010   | 0.207           | -0.38                 | 0.023   | 0.455           |
| <b>Arhgef15</b>                                         | NM_177566    | ref Mus musculus Rho guanine nucleotide exchange factor (GEF) 15 (Arhgef15), mRNA [NM_177566]                                           | -0.25                | 0.010   | 0.208           | -0.24                 | 0.024   | 0.459           |
| <b>Elovl7</b>                                           | NM_029001    | ref Mus musculus ELOVL family member 7, elongation of long chain fatty acids (yeast) (Elovl7), mRNA [NM_029001]                         | -0.96                | 0.010   | 0.208           | -1.09                 | 0.001   | 0.245           |

| Online Supplemental Table IV: mG4H-STZ and Con-STZ Both |           |                                                                                                                                                                          |                      |         |                 |                       |         |                 |
|---------------------------------------------------------|-----------|--------------------------------------------------------------------------------------------------------------------------------------------------------------------------|----------------------|---------|-----------------|-----------------------|---------|-----------------|
| Gene Symbol                                             | RefSeq    | Description                                                                                                                                                              | logFC<br>Con-<br>STZ | P-value | Adj.<br>P-value | logFC<br>mG4H-<br>STZ | P-value | Adj.<br>P-value |
| <b>Sox4</b>                                             | NM_009238 | ref Mus musculus SRY-box containing gene 4 (Sox4), mRNA [NM_009238]                                                                                                      | -0.47                | 0.010   | 0.208           | -0.31                 | 0.037   | 0.496           |
| <b>Hist1h4k</b>                                         | NM_178211 | ref Mus musculus histone cluster 1, H4k (Hist1h4k), mRNA [NM_178211]                                                                                                     | -0.52                | 0.010   | 0.208           | -0.58                 | 0.001   | 0.163           |
| <b>Mrpl53</b>                                           | NM_026744 | ref Mus musculus mitochondrial ribosomal protein L53 (Mrpl53), nuclear gene encoding mitochondrial protein, mRNA [NM_026744]                                             | -0.26                | 0.010   | 0.208           | -0.25                 | 0.017   | 0.429           |
| <b>Tmem117</b>                                          | NM_178789 | ref Mus musculus transmembrane protein 117 (Tmem117), mRNA [NM_178789]                                                                                                   | -0.28                | 0.010   | 0.208           | -0.24                 | 0.021   | 0.450           |
| <b>Gnpat</b>                                            | NM_010322 | ref Mus musculus glyceronephosphate O-acyltransferase (Gnpat), mRNA [NM_010322]                                                                                          | -0.25                | 0.010   | 0.208           | -0.20                 | 0.042   | 0.508           |
| <b>1110021J02Rik</b>                                    | NM_026782 | ref Mus musculus RIKEN cDNA 1110021J02 gene (1110021J02Rik), transcript variant 2, mRNA [NM_026782]                                                                      | -0.35                | 0.010   | 0.208           | -0.34                 | 0.019   | 0.441           |
| <b>Rtn4ip1</b>                                          | NM_130892 | ref Mus musculus reticulon 4 interacting protein 1 (Rtn4ip1), nuclear gene encoding mitochondrial protein, mRNA [NM_130892]                                              | -0.30                | 0.010   | 0.208           | -0.25                 | 0.048   | 0.516           |
| <b>1810049H13Rik</b>                                    | NM_025560 | ref Mus musculus RIKEN cDNA 1810049H13 gene (1810049H13Rik), mRNA [NM_025560]                                                                                            | -0.31                | 0.010   | 0.208           | -0.32                 | 0.017   | 0.433           |
| <b>Gm6195</b>                                           | XM_885368 | ref PREDICTED: Mus musculus predicted gene, EG620986 (EG620986), mRNA [XM_885368]                                                                                        | -0.38                | 0.010   | 0.209           | -0.45                 | 0.038   | 0.499           |
| <b>Ccdc28b</b>                                          | NM_025455 | ref Mus musculus coiled coil domain containing 28B (Ccdc28b), mRNA [NM_025455]                                                                                           | -0.28                | 0.010   | 0.210           | -0.27                 | 0.022   | 0.452           |
| <b>Chordc1</b>                                          | NM_025844 | ref Mus musculus cysteine and histidine-rich domain (CHORD)-containing, zinc-binding protein 1 (Chordc1), mRNA [NM_025844]                                               | -0.37                | 0.010   | 0.210           | -0.46                 | 0.033   | 0.489           |
| <b>Zfp454</b>                                           | NM_172794 | ref Mus musculus zinc finger protein 454 (Zfp454), mRNA [NM_172794]                                                                                                      | -0.66                | 0.010   | 0.211           | -0.66                 | 0.015   | 0.419           |
| <b>Atp5k</b>                                            | NM_007507 | ref Mus musculus ATP synthase, H <sup>+</sup> transporting, mitochondrial F1F0 complex, subunit e (Atp5k), nuclear gene encoding mitochondrial protein, mRNA [NM_007507] | -0.24                | 0.010   | 0.212           | -0.23                 | 0.029   | 0.477           |

Online Supplemental Table IV: mG4H-STZ and Con-STZ Both

| Gene Symbol                       | RefSeq                     | Description                                                                                                                  | logFC<br>Con-<br>STZ | P-value | Adj.<br>P-value | logFC<br>mG4H-<br>STZ | P-value | Adj.<br>P-value |
|-----------------------------------|----------------------------|------------------------------------------------------------------------------------------------------------------------------|----------------------|---------|-----------------|-----------------------|---------|-----------------|
| <b>Plxnd1</b>                     | NM_026376                  | ref Mus musculus plexin D1 (Plxnd1), mRNA [NM_026376]                                                                        | -0.54                | 0.010   | 0.212           | -0.59                 | 0.024   | 0.458           |
| <b>Nhlrc4</b>                     | NM_001039038               | ref Mus musculus NHL repeat containing 4 (Nhlrc4), mRNA [NM_001039038]                                                       | -0.71                | 0.010   | 0.212           | -0.75                 | 0.004   | 0.309           |
| <b>Nup210</b>                     | NM_018815                  | ref Mus musculus nucleoporin 210 (Nup210), mRNA [NM_018815]                                                                  | -0.34                | 0.010   | 0.212           | -0.43                 | 0.018   | 0.437           |
| <b>Glr3</b>                       | BC033506                   | gb Mus musculus glutaredoxin 3, mRNA (cDNA clone MGC:35818 IMAGE:2651132), complete cds. [BC033506]                          | -0.22                | 0.010   | 0.212           | -0.24                 | 0.026   | 0.470           |
| <b>chr4:140841206-140841639_F</b> | chr4:140841206-140841639_F | lincRNA:chr4:140841206-140841639 forward strand                                                                              | -0.44                | 0.010   | 0.213           | -0.65                 | 0.035   | 0.495           |
| <b>Gm3396</b>                     | XM_001474999               | ref PREDICTED: Mus musculus hypothetical protein LOC100045832 (LOC100045832), mRNA [XM_001474999]                            | -0.46                | 0.010   | 0.214           | -0.95                 | 0.032   | 0.484           |
| <b>Rpa3</b>                       | NM_026632                  | ref Mus musculus replication protein A3 (Rpa3), mRNA [NM_026632]                                                             | -0.39                | 0.010   | 0.214           | -0.52                 | 0.027   | 0.472           |
| <b>Mrps24</b>                     | NM_026080                  | ref Mus musculus mitochondrial ribosomal protein S24 (Mrps24), nuclear gene encoding mitochondrial protein, mRNA [NM_026080] | -0.27                | 0.010   | 0.215           | -0.21                 | 0.049   | 0.518           |
| <b>chr13:31736054-31781679_R</b>  | chr13:31736054-31781679_R  | lincRNA:chr13:31736054-31781679 reverse strand                                                                               | -0.48                | 0.010   | 0.216           | -0.46                 | 0.037   | 0.496           |
| <b>Klhl30</b>                     | NM_027551                  | ref Mus musculus kelch-like 30 (Drosophila) (Klhl30), mRNA [NM_027551]                                                       | -0.65                | 0.010   | 0.216           | -0.61                 | 0.012   | 0.412           |
| <b>6030458C11Rik</b>              | NM_029998                  | ref Mus musculus RIKEN cDNA 6030458C11 gene (6030458C11Rik), transcript variant 2, mRNA [NM_029998]                          | -0.26                | 0.011   | 0.216           | -0.52                 | 0.044   | 0.513           |
| <b>Ntsr2</b>                      | NM_008747                  | ref Mus musculus neurotensin receptor 2 (Ntsr2), mRNA [NM_008747]                                                            | -0.40                | 0.011   | 0.216           | -0.50                 | 0.003   | 0.305           |
| <b>Anxa13</b>                     | NM_027211                  | ref Mus musculus annexin A13 (Anxa13), mRNA [NM_027211]                                                                      | -0.53                | 0.011   | 0.216           | -0.38                 | 0.044   | 0.513           |
| <b>1190003J15Rik</b>              | NM_029821                  | ref Mus musculus RIKEN cDNA 1190003J15 gene (1190003J15Rik), mRNA [NM_029821]                                                | -0.48                | 0.011   | 0.216           | -0.41                 | 0.014   | 0.418           |
| <b>Fam92a</b>                     | NM_026558                  | ref Mus musculus family with sequence similarity 92, member A (Fam92a), mRNA [NM_026558]                                     | -0.28                | 0.011   | 0.217           | -0.39                 | 0.047   | 0.515           |

| Online Supplemental Table IV: mG4H-STZ and Con-STZ Both |                    |                                                                                                                                       |                      |         |                 |                       |         |                 |
|---------------------------------------------------------|--------------------|---------------------------------------------------------------------------------------------------------------------------------------|----------------------|---------|-----------------|-----------------------|---------|-----------------|
| Gene Symbol                                             | RefSeq             | Description                                                                                                                           | logFC<br>Con-<br>STZ | P-value | Adj.<br>P-value | logFC<br>mG4H-<br>STZ | P-value | Adj.<br>P-value |
| Rnf7                                                    | NM_011279          | ref Mus musculus ring finger protein 7 (Rnf7), mRNA [NM_011279]                                                                       | -0.28                | 0.011   | 0.217           | -0.33                 | 0.006   | 0.369           |
| LOC675695                                               | XM_984350          | ref PREDICTED: Mus musculus similar to LOC635138 protein (LOC675695), mRNA [XM_984350]                                                | -0.47                | 0.011   | 0.217           | -0.76                 | 0.010   | 0.405           |
| 2310010M20Rik                                           | NM_183283          | ref Mus musculus RIKEN cDNA 2310010M20 gene (2310010M20Rik), mRNA [NM_183283]                                                         | -0.49                | 0.011   | 0.218           | -0.36                 | 0.040   | 0.501           |
| Magi3                                                   | NM_133853          | ref Mus musculus membrane associated guanylate kinase, WW and PDZ domain containing 3 (Magi3), transcript variant 2, mRNA [NM_133853] | -0.39                | 0.011   | 0.218           | -0.25                 | 0.029   | 0.477           |
| Pop5                                                    | NM_026398          | ref Mus musculus processing of precursor 5, ribonuclease P/MRP family (S. cerevisiae) (Pop5), mRNA [NM_026398]                        | -0.26                | 0.011   | 0.220           | -0.29                 | 0.013   | 0.412           |
| Rfx8                                                    | NM_001145660       | ref Mus musculus regulatory factor X 8 (Rfx8), mRNA [NM_001145660]                                                                    | -0.61                | 0.011   | 0.220           | -0.67                 | 0.013   | 0.412           |
| Acly                                                    | NM_134037          | ref Mus musculus ATP citrate lyase (Acly), mRNA [NM_134037]                                                                           | -0.30                | 0.011   | 0.222           | -0.28                 | 0.014   | 0.418           |
| ENSMUST00000079084                                      | ENSMUST00000079084 | ens histone cluster 1, H4d Gene [Source:MGI (curated);Acc:MGI:2448423] [ENSMUST00000079084]                                           | -0.48                | 0.011   | 0.222           | -0.48                 | 0.003   | 0.303           |
| Cyp51                                                   | NM_020010          | ref Mus musculus cytochrome P450, family 51 (Cyp51), mRNA [NM_020010]                                                                 | -0.52                | 0.011   | 0.222           | -0.41                 | 0.026   | 0.467           |
| Gng11                                                   | NM_025331          | ref Mus musculus guanine nucleotide binding protein (G protein), gamma 11 (Gng11), mRNA [NM_025331]                                   | -0.44                | 0.011   | 0.223           | -0.63                 | 0.030   | 0.479           |
| Mrpl11                                                  | NM_025553          | ref Mus musculus mitochondrial ribosomal protein L11 (Mrpl11), nuclear gene encoding mitochondrial protein, mRNA [NM_025553]          | -0.26                | 0.011   | 0.223           | -0.25                 | 0.019   | 0.440           |
| Crls1                                                   | NM_001024385       | ref Mus musculus cardiolipin synthase 1 (Crls1), transcript variant 1, mRNA [NM_001024385]                                            | -0.42                | 0.011   | 0.224           | -0.46                 | 0.010   | 0.402           |
| Ctnnbip1                                                | NM_023465          | ref Mus musculus catenin beta interacting protein 1 (Ctnnbip1), transcript variant 1, mRNA [NM_023465]                                | -0.35                | 0.011   | 0.225           | -0.33                 | 0.014   | 0.418           |
| Cabp7                                                   | NM_138948          | ref Mus musculus calcium binding protein 7 (Cabp7), mRNA [NM_138948]                                                                  | -0.71                | 0.011   | 0.225           | -0.60                 | 0.045   | 0.513           |
| Tmem51                                                  | NM_145402          | ref Mus musculus transmembrane protein 51 (Tmem51), mRNA [NM_145402]                                                                  | -0.44                | 0.011   | 0.226           | -0.41                 | 0.049   | 0.519           |

| Online Supplemental Table IV: mG4H-STZ and Con-STZ Both |                            |                                                                                                                                                            |                      |         |                 |                       |         |                 |
|---------------------------------------------------------|----------------------------|------------------------------------------------------------------------------------------------------------------------------------------------------------|----------------------|---------|-----------------|-----------------------|---------|-----------------|
| Gene Symbol                                             | RefSeq                     | Description                                                                                                                                                | logFC<br>Con-<br>STZ | P-value | Adj.<br>P-value | logFC<br>mG4H-<br>STZ | P-value | Adj.<br>P-value |
| Ccbl1                                                   | NM_172404                  | ref Mus musculus cysteine conjugate-beta lyase 1 (Ccbl1), mRNA [NM_172404]                                                                                 | -0.26                | 0.011   | 0.226           | -0.29                 | 0.039   | 0.501           |
| Cmtm8                                                   | NM_027294                  | ref Mus musculus CKLF-like MARVEL transmembrane domain containing 8 (Cmtm8), mRNA [NM_027294]                                                              | -0.25                | 0.011   | 0.226           | -0.31                 | 0.007   | 0.384           |
| Gm4248                                                  | XM_001479553               | ref PREDICTED: Mus musculus similar to hCG2040565 (LOC100043129), mRNA [XM_001479553]                                                                      | -0.34                | 0.011   | 0.228           | -0.57                 | 0.045   | 0.513           |
| chr6:128393530-128394127_F                              | chr6:128393530-128394127_F | lincRNA:chr6:128393530-128394127 forward strand                                                                                                            | -0.51                | 0.012   | 0.228           | -0.45                 | 0.046   | 0.513           |
| Gorasp1                                                 | NM_028976                  | ref Mus musculus golgi reassembly stacking protein 1 (Gorasp1), mRNA [NM_028976]                                                                           | -0.36                | 0.012   | 0.229           | -0.33                 | 0.023   | 0.453           |
| ENSMUST00000101060                                      | ENSMUST00000101060         | ens Putative uncharacterized protein [Source:UniProtKB/TrEMBL;Acc:Q3UQ53] [ENSMUST00000101060]                                                             | -0.29                | 0.012   | 0.231           | -0.26                 | 0.044   | 0.512           |
| Sox11                                                   | NM_009234                  | ref Mus musculus SRY-box containing gene 11 (Sox11), mRNA [NM_009234]                                                                                      | -0.60                | 0.012   | 0.231           | -0.53                 | 0.035   | 0.494           |
| Pcdh17                                                  | NM_001013753               | ref Mus musculus protocadherin 17 (Pcdh17), mRNA [NM_001013753]                                                                                            | -0.58                | 0.012   | 0.231           | -0.50                 | 0.025   | 0.466           |
| Phkb                                                    | NM_199446                  | ref Mus musculus phosphorylase kinase beta (Phkb), mRNA [NM_199446]                                                                                        | -0.30                | 0.012   | 0.231           | -0.33                 | 0.029   | 0.477           |
| Timm8a1                                                 | NM_013898                  | ref Mus musculus translocase of inner mitochondrial membrane 8 homolog a1 (yeast) (Timm8a1), nuclear gene encoding mitochondrial protein, mRNA [NM_013898] | -0.25                | 0.012   | 0.231           | -0.23                 | 0.020   | 0.443           |
| chr2:145501249-145508811_F                              | chr2:145501249-145508811_F | lincRNA:chr2:145501249-145508811 forward strand                                                                                                            | -0.61                | 0.012   | 0.231           | -0.79                 | 0.002   | 0.279           |
| Gm239                                                   | NM_001033333               | ref Mus musculus predicted gene 239 (Gm239), mRNA [NM_001033333]                                                                                           | -0.49                | 0.012   | 0.231           | -0.70                 | 0.006   | 0.356           |
| LOC100046079                                            | XM_001475417               | ref PREDICTED: Mus musculus similar to cytochrome c oxidase, subunit Vb (LOC100046079), mRNA [XM_001475417]                                                | -0.25                | 0.012   | 0.232           | -0.23                 | 0.045   | 0.513           |
| Timd4                                                   | NM_178759                  | ref Mus musculus T-cell immunoglobulin and mucin domain containing 4 (Timd4), mRNA [NM_178759]                                                             | -0.58                | 0.012   | 0.232           | -0.60                 | 0.025   | 0.464           |

Online Supplemental Table IV: mG4H-STZ and Con-STZ Both

| Gene Symbol                      | RefSeq                    | Description                                                                                                           | logFC<br>Con-<br>STZ | P-value | Adj.<br>P-value | logFC<br>mG4H-<br>STZ | P-value | Adj.<br>P-value |
|----------------------------------|---------------------------|-----------------------------------------------------------------------------------------------------------------------|----------------------|---------|-----------------|-----------------------|---------|-----------------|
| <b>chr14:77511189-77522852_F</b> | chr14:77511189-77522852_F | lincRNA:chr14:77511189-77522852 forward strand                                                                        | -0.50                | 0.012   | 0.234           | -0.48                 | 0.001   | 0.222           |
| <b>Slc4a3</b>                    | NM_009208                 | ref Mus musculus solute carrier family 4 (anion exchanger), member 3 (Slc4a3), mRNA [NM_009208]                       | -0.28                | 0.012   | 0.235           | -0.25                 | 0.032   | 0.484           |
| <b>Tmem44</b>                    | NM_172614                 | ref Mus musculus transmembrane protein 44 (Tmem44), mRNA [NM_172614]                                                  | -0.29                | 0.012   | 0.235           | -0.28                 | 0.018   | 0.437           |
| <b>Fam58b</b>                    | NM_197989                 | ref Mus musculus family with sequence similarity 58, member B (Fam58b), mRNA [NM_197989]                              | -0.28                | 0.012   | 0.235           | -0.30                 | 0.029   | 0.477           |
| <b>Gm5595</b>                    | NM_001008427              | ref Mus musculus predicted gene 5595 (Gm5595), mRNA [NM_001008427]                                                    | -0.46                | 0.012   | 0.237           | -0.77                 | 0.009   | 0.398           |
| <b>Tmx2</b>                      | NM_025868                 | ref Mus musculus thioredoxin-related transmembrane protein 2 (Tmx2), mRNA [NM_025868]                                 | -0.53                | 0.012   | 0.237           | -0.53                 | 0.003   | 0.281           |
| <b>Rprd1a</b>                    | NM_144861                 | ref Mus musculus regulation of nuclear pre-mRNA domain containing 1A (Rprd1a), mRNA [NM_144861]                       | -0.28                | 0.012   | 0.238           | -0.30                 | 0.020   | 0.443           |
| <b>Them4</b>                     | NM_029431                 | ref Mus musculus thioesterase superfamily member 4 (Them4), mRNA [NM_029431]                                          | -0.43                | 0.012   | 0.238           | -0.38                 | 0.026   | 0.471           |
| <b>G6pc3</b>                     | NM_175935                 | ref Mus musculus glucose 6 phosphatase, catalytic, 3 (G6pc3), mRNA [NM_175935]                                        | -0.27                | 0.012   | 0.238           | -0.29                 | 0.009   | 0.398           |
| <b>Zdhhc13</b>                   | NM_028031                 | ref Mus musculus zinc finger, DHHC domain containing 13 (Zdhhc13), mRNA [NM_028031]                                   | -0.23                | 0.012   | 0.239           | -0.22                 | 0.040   | 0.501           |
| <b>Fndc4</b>                     | NM_022424                 | ref Mus musculus fibronectin type III domain containing 4 (Fndc4), mRNA [NM_022424]                                   | -0.35                | 0.012   | 0.239           | -0.34                 | 0.008   | 0.391           |
| <b>LOC100046742</b>              | XR_032893                 | ref PREDICTED: Mus musculus similar to reproductive homeobox on X chromosome, 12 (LOC100046742), misc RNA [XR_032893] | -0.41                | 0.013   | 0.239           | -0.47                 | 0.034   | 0.491           |
| <b>AW047481</b>                  | BU848224                  | gb AGENCOURT_10389307 NIH_MGC_144 Mus musculus cDNA clone IMAGE:6595514 5', mRNA sequence [BU848224]                  | -0.32                | 0.013   | 0.239           | -0.30                 | 0.016   | 0.427           |
| <b>Gemin7</b>                    | NM_027189                 | ref Mus musculus gem (nuclear organelle) associated protein 7 (Gemin7), mRNA [NM_027189]                              | -0.29                | 0.013   | 0.239           | -0.30                 | 0.029   | 0.477           |
| <b>Dusp22</b>                    | NM_001037955              | ref Mus musculus dual specificity phosphatase 22 (Dusp22), transcript variant 1, mRNA [NM_001037955]                  | -0.31                | 0.013   | 0.240           | -0.49                 | 0.003   | 0.303           |

| Online Supplemental Table IV: mG4H-STZ and Con-STZ Both |                            |                                                                                                                                                                |                      |         |                 |                       |         |                 |
|---------------------------------------------------------|----------------------------|----------------------------------------------------------------------------------------------------------------------------------------------------------------|----------------------|---------|-----------------|-----------------------|---------|-----------------|
| Gene Symbol                                             | RefSeq                     | Description                                                                                                                                                    | logFC<br>Con-<br>STZ | P-value | Adj.<br>P-value | logFC<br>mG4H-<br>STZ | P-value | Adj.<br>P-value |
| <b>chr1:135956616-135957485_R</b>                       | chr1:135956616-135957485_R | lincRNA:chr1:135956616-135957485 reverse strand                                                                                                                | -0.44                | 0.013   | 0.241           | -0.46                 | 0.018   | 0.436           |
| <b>Tmem132a</b>                                         | NM_133804                  | ref Mus musculus transmembrane protein 132A (Tmem132a), mRNA [NM_133804]                                                                                       | -0.49                | 0.013   | 0.241           | -0.39                 | 0.044   | 0.513           |
| <b>Mrps15</b>                                           | NM_025544                  | ref Mus musculus mitochondrial ribosomal protein S15 (Mrps15), nuclear gene encoding mitochondrial protein, mRNA [NM_025544]                                   | -0.25                | 0.013   | 0.242           | -0.30                 | 0.019   | 0.439           |
| <b>Siva1</b>                                            | NM_013929                  | ref Mus musculus SIVA1, apoptosis-inducing factor (Siva1), transcript variant 1, mRNA [NM_013929]                                                              | -0.77                | 0.013   | 0.242           | -0.45                 | 0.009   | 0.394           |
| <b>MacroD2</b>                                          | NM_028387                  | ref Mus musculus MACRO domain containing 2 (MacroD2), transcript variant 2, mRNA [NM_028387]                                                                   | -0.39                | 0.013   | 0.244           | -0.31                 | 0.043   | 0.510           |
| <b>ENSMUST00000093816</b>                               | ENSMUST00000093816         | ens RIKEN cDNA 2310046A06 gene Gene [Source:MGI Symbol;Acc:MGI:1916892] [ENSMUST00000093816]                                                                   | -0.29                | 0.013   | 0.244           | -0.37                 | 0.015   | 0.419           |
| <b>Tsnaxip1</b>                                         | NM_024445                  | ref Mus musculus translin-associated factor X (Tsnax) interacting protein 1 (Tsnaxip1), mRNA [NM_024445]                                                       | -0.93                | 0.013   | 0.244           | -0.78                 | 0.002   | 0.262           |
| <b>Sel1l3</b>                                           | NM_172710                  | ref Mus musculus sel-1 suppressor of lin-12-like 3 (C. elegans) (Sel1l3), mRNA [NM_172710]                                                                     | -0.56                | 0.013   | 0.245           | -0.49                 | 0.022   | 0.450           |
| <b>Gpd2</b>                                             | NM_010274                  | ref Mus musculus glycerol phosphate dehydrogenase 2, mitochondrial (Gpd2), nuclear gene encoding mitochondrial protein, transcript variant 2, mRNA [NM_010274] | -0.22                | 0.013   | 0.245           | -0.25                 | 0.048   | 0.518           |
| <b>Manba</b>                                            | NM_027288                  | ref Mus musculus mannosidase, beta A, lysosomal (Manba), mRNA [NM_027288]                                                                                      | -0.45                | 0.013   | 0.245           | -0.44                 | 0.008   | 0.390           |
| <b>chr9:30529709-30589042_R</b>                         | chr9:30529709-30589042_R   | lincRNA:chr9:30529709-30589042 reverse strand                                                                                                                  | -0.42                | 0.013   | 0.245           | -0.40                 | 0.015   | 0.421           |
| <b>chr2:153163620-153170845_R</b>                       | chr2:153163620-153170845_R | lincRNA:chr2:153163620-153170845 reverse strand                                                                                                                | -0.29                | 0.013   | 0.246           | -0.34                 | 0.040   | 0.504           |
| <b>1810063B05Rik</b>                                    | NM_174987                  | ref Mus musculus RIKEN cDNA 1810063B05 gene (1810063B05Rik), mRNA [NM_174987]                                                                                  | -0.31                | 0.013   | 0.247           | -0.40                 | 0.025   | 0.463           |



Online Supplemental Table IV: mG4H-STZ and Con-STZ Both

| Gene Symbol                       | RefSeq                     | Description                                                                                                                                                                   | logFC<br>Con-<br>STZ | P-value | Adj.<br>P-value | logFC<br>mG4H-<br>STZ | P-value | Adj.<br>P-value |
|-----------------------------------|----------------------------|-------------------------------------------------------------------------------------------------------------------------------------------------------------------------------|----------------------|---------|-----------------|-----------------------|---------|-----------------|
| <b>Slc25a19</b>                   | NM_026071                  | ref Mus musculus solute carrier family 25 (mitochondrial thiamine pyrophosphate carrier), member 19 (Slc25a19), nuclear gene encoding mitochondrial protein, mRNA [NM_026071] | -0.38                | 0.013   | 0.247           | -0.37                 | 0.039   | 0.500           |
| <b>Flad1</b>                      | NM_177041                  | ref Mus musculus RFad1, flavin adenine dinucleotide synthetase, homolog (yeast) (Flad1), mRNA [NM_177041]                                                                     | -0.30                | 0.013   | 0.248           | -0.38                 | 0.007   | 0.384           |
| <b>Ttc32</b>                      | NM_029321                  | ref Mus musculus tetratricopeptide repeat domain 32 (Ttc32), mRNA [NM_029321]                                                                                                 | -0.26                | 0.013   | 0.248           | -0.38                 | 0.012   | 0.407           |
| <b>Mrpl44</b>                     | NM_001081210               | ref Mus musculus mitochondrial ribosomal protein L44 (Mrpl44), nuclear gene encoding mitochondrial protein, mRNA [NM_001081210]                                               | -0.37                | 0.013   | 0.248           | -0.28                 | 0.046   | 0.513           |
| <b>Gm5113</b>                     | NM_001033540               | ref Mus musculus predicted gene 5113 (Gm5113), mRNA [NM_001033540]                                                                                                            | -0.32                | 0.013   | 0.249           | -0.50                 | 0.016   | 0.423           |
| <b>EG667885</b>                   | XM_986610                  | ref PREDICTED: Mus musculus predicted gene, EG667885 (EG667885), mRNA [XM_986610]                                                                                             | -0.63                | 0.014   | 0.250           | -1.21                 | 0.018   | 0.437           |
| <b>Clec7a</b>                     | NM_020008                  | ref Mus musculus C-type lectin domain family 7, member a (Clec7a), mRNA [NM_020008]                                                                                           | -0.53                | 0.014   | 0.250           | -0.55                 | 0.013   | 0.412           |
| <b>chr7:117140887-117152562_F</b> | chr7:117140887-117152562_F | lincRNA:chr7:117140887-117152562 forward strand                                                                                                                               | -0.26                | 0.014   | 0.251           | -0.35                 | 0.003   | 0.290           |
| <b>Tmed8</b>                      | NM_001033475               | ref Mus musculus transmembrane emp24 domain containing 8 (Tmed8), mRNA [NM_001033475]                                                                                         | -0.26                | 0.014   | 0.251           | -0.36                 | 0.044   | 0.512           |
| <b>Scn1b</b>                      | NM_011322                  | ref Mus musculus sodium channel, voltage-gated, type I, beta (Scn1b), mRNA [NM_011322]                                                                                        | -0.32                | 0.014   | 0.251           | -0.29                 | 0.034   | 0.491           |
| <b>Mapkapk5</b>                   | NM_010765                  | ref Mus musculus MAP kinase-activated protein kinase 5 (Mapkapk5), mRNA [NM_010765]                                                                                           | -0.66                | 0.014   | 0.251           | -0.32                 | 0.010   | 0.400           |
| <b>Pde4a</b>                      | NM_183408                  | ref Mus musculus phosphodiesterase 4A, cAMP specific (Pde4a), transcript variant 5, mRNA [NM_183408]                                                                          | -0.57                | 0.014   | 0.253           | -0.46                 | 0.040   | 0.504           |
| <b>6430571L13Rik</b>              | NM_175486                  | ref Mus musculus RIKEN cDNA 6430571L13 gene (6430571L13Rik), mRNA [NM_175486]                                                                                                 | -0.68                | 0.014   | 0.253           | -0.61                 | 0.034   | 0.493           |
| <b>Ccnjl</b>                      | NM_001045530               | ref Mus musculus cyclin J-like (Ccnjl), mRNA [NM_001045530]                                                                                                                   | -0.53                | 0.014   | 0.253           | -0.44                 | 0.028   | 0.474           |

| Online Supplemental Table IV: mG4H-STZ and Con-STZ Both |                           |                                                                                                                                                    |                      |         |                 |                       |         |                 |
|---------------------------------------------------------|---------------------------|----------------------------------------------------------------------------------------------------------------------------------------------------|----------------------|---------|-----------------|-----------------------|---------|-----------------|
| Gene Symbol                                             | RefSeq                    | Description                                                                                                                                        | logFC<br>Con-<br>STZ | P-value | Adj.<br>P-value | logFC<br>mG4H-<br>STZ | P-value | Adj.<br>P-value |
| chr14:22267795-22319045_F                               | chr14:22267795-22319045_F | lincRNA:chr14:22267795-22319045 forward strand                                                                                                     | -0.29                | 0.014   | 0.253           | -0.26                 | 0.016   | 0.424           |
| Armc1                                                   | NM_028840                 | ref Mus musculus armadillo repeat containing 1 (Armc1), mRNA [NM_028840]                                                                           | -0.31                | 0.014   | 0.253           | -0.37                 | 0.029   | 0.477           |
| Fat4                                                    | NM_183221                 | ref Mus musculus FAT tumor suppressor homolog 4 (Drosophila) (Fat4), mRNA [NM_183221]                                                              | -0.25                | 0.014   | 0.253           | -0.27                 | 0.017   | 0.435           |
| Larp4b                                                  | NM_172585                 | ref Mus musculus La ribonucleoprotein domain family, member 4B (Larp4b), mRNA [NM_172585]                                                          | -0.32                | 0.014   | 0.253           | -0.33                 | 0.048   | 0.517           |
| Elk3                                                    | NM_013508                 | ref Mus musculus ELK3, member of ETS oncogene family (Elk3), transcript variant 1, mRNA [NM_013508]                                                | -0.31                | 0.014   | 0.254           | -0.39                 | 0.030   | 0.479           |
| I7Rn6                                                   | NM_026304                 | ref Mus musculus lethal, Chr 7, Rinchik 6 (I7Rn6), mRNA [NM_026304]                                                                                | -0.26                | 0.014   | 0.254           | -0.29                 | 0.024   | 0.459           |
| Brp44l                                                  | NM_018819                 | ref Mus musculus brain protein 44-like (Brp44l), mRNA [NM_018819]                                                                                  | -0.28                | 0.014   | 0.255           | -0.28                 | 0.029   | 0.477           |
| Nat8b                                                   | XM_485799                 | ref PREDICTED: Mus musculus predicted gene, EG434057 (EG434057), mRNA [XM_485799]                                                                  | -0.42                | 0.014   | 0.256           | -0.43                 | 0.020   | 0.443           |
| Mrps36                                                  | NM_025369                 | ref Mus musculus mitochondrial ribosomal protein S36 (Mrps36), nuclear gene encoding mitochondrial protein, transcript variant 1, mRNA [NM_025369] | -0.27                | 0.014   | 0.257           | -0.24                 | 0.025   | 0.467           |
| Ndufs8                                                  | NM_144870                 | ref Mus musculus NADH dehydrogenase (ubiquinone) Fe-S protein 8 (Ndufs8), nuclear gene encoding mitochondrial protein, mRNA [NM_144870]            | -0.50                | 0.014   | 0.257           | -0.28                 | 0.009   | 0.398           |
| Plcd1                                                   | NM_019676                 | ref Mus musculus phospholipase C, delta 1 (Plcd1), mRNA [NM_019676]                                                                                | -0.28                | 0.014   | 0.257           | -0.34                 | 0.019   | 0.439           |
| Magt1                                                   | NM_025952                 | ref Mus musculus magnesium transporter 1 (Magt1), transcript variant 2, mRNA [NM_025952]                                                           | -0.38                | 0.014   | 0.257           | -0.37                 | 0.006   | 0.369           |
| Agmat                                                   | NM_001081408              | ref Mus musculus agmatine ureohydrolase (agmatinase) (Agmat), mRNA [NM_001081408]                                                                  | -0.37                | 0.014   | 0.257           | -0.40                 | 0.015   | 0.418           |
| Spnb4                                                   | NM_032610                 | ref Mus musculus spectrin beta 4 (Spnb4), mRNA [NM_032610]                                                                                         | -0.41                | 0.014   | 0.257           | -0.31                 | 0.031   | 0.481           |
| Slc22a3                                                 | NM_011395                 | ref Mus musculus solute carrier family 22 (organic cation transporter), member 3 (Slc22a3), mRNA [NM_011395]                                       | -0.73                | 0.014   | 0.258           | -0.57                 | 0.018   | 0.435           |

| Online Supplemental Table IV: mG4H-STZ and Con-STZ Both |                           |                                                                                                                                               |                      |         |                 |                       |         |                 |
|---------------------------------------------------------|---------------------------|-----------------------------------------------------------------------------------------------------------------------------------------------|----------------------|---------|-----------------|-----------------------|---------|-----------------|
| Gene Symbol                                             | RefSeq                    | Description                                                                                                                                   | logFC<br>Con-<br>STZ | P-value | Adj.<br>P-value | logFC<br>mG4H-<br>STZ | P-value | Adj.<br>P-value |
| <b>Dnlz</b>                                             | NM_026828                 | ref Mus musculus DNL-type zinc finger (Dnlz), transcript variant 1, mRNA [NM_026828]                                                          | -0.23                | 0.014   | 0.258           | -0.23                 | 0.037   | 0.496           |
| <b>Rabggta</b>                                          | NM_019519                 | ref Mus musculus Rab geranylgeranyl transferase, a subunit (Rabggta), mRNA [NM_019519]                                                        | -0.26                | 0.015   | 0.259           | -0.20                 | 0.038   | 0.499           |
| <b>2610002I17Rik</b>                                    | NM_001081381              | ref Mus musculus RIKEN cDNA 2610002I17 (2610002I17Rik), mRNA [NM_001081381]                                                                   | -0.58                | 0.015   | 0.260           | -0.55                 | 0.046   | 0.513           |
| <b>Hamp2</b>                                            | NM_183257                 | ref Mus musculus hepcidin antimicrobial peptide 2 (Hamp2), mRNA [NM_183257]                                                                   | -0.39                | 0.015   | 0.260           | -0.35                 | 0.009   | 0.395           |
| <b>Zfp386</b>                                           | NM_001004066              | ref Mus musculus zinc finger protein 386 (Kruppel-like) (Zfp386), transcript variant 1, mRNA [NM_001004066]                                   | -0.32                | 0.015   | 0.260           | -0.36                 | 0.041   | 0.506           |
| <b>chr11:97505439-97522274_R</b>                        | chr11:97505439-97522274_R | lincRNA:chr11:97505439-97522274 reverse strand                                                                                                | -0.40                | 0.015   | 0.260           | -0.45                 | 0.007   | 0.374           |
| <b>Ndufb7</b>                                           | NM_025843                 | ref Mus musculus NADH dehydrogenase (ubiquinone) 1 beta subcomplex, 7 (Ndufb7), nuclear gene encoding mitochondrial protein, mRNA [NM_025843] | -0.22                | 0.015   | 0.260           | -0.23                 | 0.046   | 0.513           |
| <b>Chadl</b>                                            | NM_001164320              | ref Mus musculus chondroadherin-like (Chadl), mRNA [NM_001164320]                                                                             | -0.43                | 0.015   | 0.260           | -0.44                 | 0.010   | 0.400           |
| <b>Dazl</b>                                             | NM_010021                 | ref Mus musculus deleted in azoospermia-like (Dazl), mRNA [NM_010021]                                                                         | -0.32                | 0.015   | 0.261           | -0.74                 | 0.009   | 0.394           |
| <b>Tmem86a</b>                                          | NM_026436                 | ref Mus musculus transmembrane protein 86A (Tmem86a), mRNA [NM_026436]                                                                        | -0.46                | 0.015   | 0.262           | -0.49                 | 0.004   | 0.329           |
| <b>Rwdd4a</b>                                           | NM_203507                 | ref Mus musculus RWD domain containing 4A (Rwdd4a), mRNA [NM_203507]                                                                          | -0.33                | 0.015   | 0.263           | -0.37                 | 0.023   | 0.454           |
| <b>Zfp536</b>                                           | NM_172385                 | ref Mus musculus zinc finger protein 536 (Zfp536), mRNA [NM_172385]                                                                           | -0.52                | 0.015   | 0.263           | -0.49                 | 0.009   | 0.398           |
| <b>Ppig</b>                                             | NM_001081086              | ref Mus musculus peptidyl-prolyl isomerase G (cyclophilin G) (Ppig), mRNA [NM_001081086]                                                      | -0.41                | 0.015   | 0.263           | -0.47                 | 0.032   | 0.483           |
| <b>Rpusd3</b>                                           | NM_001033204              | ref Mus musculus RNA pseudouridylate synthase domain containing 3 (Rpusd3), mRNA [NM_001033204]                                               | -0.28                | 0.015   | 0.263           | -0.22                 | 0.036   | 0.495           |
| <b>F2rl3</b>                                            | NM_007975                 | ref Mus musculus coagulation factor II (thrombin) receptor-like 3 (F2rl3), mRNA [NM_007975]                                                   | -0.46                | 0.015   | 0.263           | -0.54                 | 0.043   | 0.509           |

Online Supplemental Table IV: mG4H-STZ and Con-STZ Both

| Gene Symbol               | RefSeq                    | Description                                                                                                                                                | logFC<br>Con-<br>STZ | P-value | Adj.<br>P-value | logFC<br>mG4H-<br>STZ | P-value | Adj.<br>P-value |
|---------------------------|---------------------------|------------------------------------------------------------------------------------------------------------------------------------------------------------|----------------------|---------|-----------------|-----------------------|---------|-----------------|
| chr17:84470764-84486339_R | chr17:84470764-84486339_R | lincRNA:chr17:84470764-84486339 reverse strand                                                                                                             | -0.41                | 0.015   | 0.263           | -0.39                 | 0.026   | 0.470           |
| chr14:77511189-77522852_F | chr14:77511189-77522852_F | lincRNA:chr14:77511189-77522852 forward strand                                                                                                             | -0.39                | 0.015   | 0.264           | -0.50                 | 0.000   | 0.160           |
| Ahsa1                     | NM_146036                 | ref Mus musculus AHA1, activator of heat shock protein ATPase homolog 1 (yeast) (Ahsa1), mRNA [NM_146036]                                                  | -0.23                | 0.015   | 0.264           | -0.22                 | 0.035   | 0.495           |
| Fam96a                    | NM_026635                 | ref Mus musculus family with sequence similarity 96, member A (Fam96a), mRNA [NM_026635]                                                                   | -0.25                | 0.015   | 0.264           | -0.25                 | 0.012   | 0.409           |
| Dolk                      | NM_177648                 | ref Mus musculus dolichol kinase (Dolk), mRNA [NM_177648]                                                                                                  | -0.28                | 0.015   | 0.264           | -0.32                 | 0.024   | 0.459           |
| A430046D13Rik             | AK038230                  | gb Mus musculus 16 days neonate thymus cDNA, RIKEN full-length enriched library, clone:A130088J11 product:unclassifiable, full insert sequence. [AK038230] | -0.37                | 0.015   | 0.265           | -0.42                 | 0.011   | 0.407           |
| chr3:84616804-84617383_R  | chr3:84616804-84617383_R  | lincRNA:chr3:84616804-84617383 reverse strand                                                                                                              | -0.33                | 0.015   | 0.266           | -0.56                 | 0.008   | 0.391           |
| Gm5595                    | NM_001008427              | ref Mus musculus predicted gene 5595 (Gm5595), mRNA [NM_001008427]                                                                                         | -0.46                | 0.015   | 0.266           | -0.72                 | 0.016   | 0.425           |
| 1810035L17Rik             | NM_026958                 | ref Mus musculus RIKEN cDNA 1810035L17 gene (1810035L17Rik), mRNA [NM_026958]                                                                              | -0.29                | 0.016   | 0.267           | -0.26                 | 0.039   | 0.501           |
| Ccdc122                   | NM_175369                 | ref Mus musculus coiled-coil domain containing 122 (Ccdc122), mRNA [NM_175369]                                                                             | -0.89                | 0.016   | 0.267           | -0.57                 | 0.000   | 0.123           |
| Ube2w                     | NM_025773                 | ref Mus musculus ubiquitin-conjugating enzyme E2W (putative) (Ube2w), mRNA [NM_025773]                                                                     | -0.24                | 0.016   | 0.267           | -0.33                 | 0.019   | 0.439           |
| Gmcl1                     | NM_011818                 | ref Mus musculus germ cell-less homolog 1 (Drosophila) (Gmcl1), mRNA [NM_011818]                                                                           | -0.23                | 0.016   | 0.267           | -0.43                 | 0.037   | 0.496           |
| Olfr826                   | NM_146676                 | ref Mus musculus olfactory receptor 826 (Olfr826), mRNA [NM_146676]                                                                                        | -0.79                | 0.016   | 0.268           | -1.00                 | 0.006   | 0.361           |
| 6430573F11Rik             | NM_176952                 | ref Mus musculus RIKEN cDNA 6430573F11 gene (6430573F11Rik), mRNA [NM_176952]                                                                              | -0.53                | 0.016   | 0.269           | -0.37                 | 0.040   | 0.504           |
| Sfrs12ip1                 | NM_026075                 | ref Mus musculus SFRS12-interacting protein 1 (Sfrs12ip1), mRNA [NM_026075]                                                                                | -0.28                | 0.016   | 0.269           | -0.38                 | 0.047   | 0.515           |

Online Supplemental Table IV: mG4H-STZ and Con-STZ Both

| Gene Symbol                | RefSeq                     | Description                                                                                                                                                                                                 | logFC<br>Con-<br>STZ | P-value | Adj.<br>P-value | logFC<br>mG4H-<br>STZ | P-value | Adj.<br>P-value |
|----------------------------|----------------------------|-------------------------------------------------------------------------------------------------------------------------------------------------------------------------------------------------------------|----------------------|---------|-----------------|-----------------------|---------|-----------------|
| LOC100046187               | XR_032407                  | ref PREDICTED: Mus musculus similar to Alpha-1-antitrypsin 1-2 precursor (Serine protease inhibitor 1-2) (Alpha-1 protease inhibitor 2) (Alpha-1-antiproteinase) (AAT) (LOC100046187), misc RNA [XR_032407] | -0.70                | 0.016   | 0.270           | -1.10                 | 0.004   | 0.315           |
| 1700020C11Rik              | NM_026443                  | ref Mus musculus RIKEN cDNA 1700020C11 gene (1700020C11Rik), mRNA [NM_026443]                                                                                                                               | -0.66                | 0.016   | 0.270           | -0.67                 | 0.010   | 0.403           |
| Gm2064                     | XM_001472343               | ref PREDICTED: Mus musculus hypothetical protein LOC100039143 (LOC100039143), mRNA [XM_001472343]                                                                                                           | -0.88                | 0.016   | 0.271           | -0.61                 | 0.014   | 0.418           |
| Cdk5r1                     | NM_009871                  | ref Mus musculus cyclin-dependent kinase 5, regulatory subunit 1 (p35) (Cdk5r1), mRNA [NM_009871]                                                                                                           | -0.57                | 0.016   | 0.271           | -0.41                 | 0.017   | 0.429           |
| Dffa                       | NM_001025296               | ref Mus musculus DNA fragmentation factor, alpha subunit (Dffa), transcript variant 1, mRNA [NM_001025296]                                                                                                  | -0.30                | 0.016   | 0.271           | -0.27                 | 0.045   | 0.513           |
| Arvcf                      | NM_033474                  | ref Mus musculus armadillo repeat gene deleted in velo-cardio-facial syndrome (Arvcf), mRNA [NM_033474]                                                                                                     | -0.29                | 0.016   | 0.273           | -0.33                 | 0.045   | 0.513           |
| Nme6                       | NM_018757                  | ref Mus musculus non-metastatic cells 6, protein expressed in (nucleoside-diphosphate kinase) (Nme6), mRNA [NM_018757]                                                                                      | -0.32                | 0.016   | 0.273           | -0.29                 | 0.043   | 0.511           |
| Reg3b                      | NM_011036                  | ref Mus musculus regenerating islet-derived 3 beta (Reg3b), mRNA [NM_011036]                                                                                                                                | -0.52                | 0.016   | 0.273           | -0.55                 | 0.015   | 0.420           |
| Fahd2a                     | NM_029629                  | ref Mus musculus fumarylacetoacetate hydrolase domain containing 2A (Fahd2a), mRNA [NM_029629]                                                                                                              | -0.27                | 0.016   | 0.273           | -0.33                 | 0.009   | 0.394           |
| Cacybp                     | NM_009786                  | ref Mus musculus calyculin binding protein (Cacybp), mRNA [NM_009786]                                                                                                                                       | -0.32                | 0.016   | 0.273           | -0.30                 | 0.031   | 0.480           |
| Tatdn3                     | NM_001163421               | ref Mus musculus TatD DNase domain containing 3 (Tatdn3), transcript variant 2, mRNA [NM_001163421]                                                                                                         | -0.48                | 0.016   | 0.274           | -0.33                 | 0.021   | 0.450           |
| chr2:167085700-167117795_F | chr2:167085700-167117795_F | lincRNA:chr2:167085700-167117795 forward strand                                                                                                                                                             | -0.22                | 0.017   | 0.274           | -0.22                 | 0.029   | 0.477           |
| LOC630284                  | XM_903408                  | ref PREDICTED: Mus musculus similar to monoclonal anti-alpha-1,3-galactosyltransferase IgM heavy chain (LOC630284), mRNA [XM_903408]                                                                        | -0.42                | 0.017   | 0.274           | -0.46                 | 0.010   | 0.401           |

| Online Supplemental Table IV: mG4H-STZ and Con-STZ Both |                             |                                                                                                                                      |                      |         |                 |                       |         |                 |
|---------------------------------------------------------|-----------------------------|--------------------------------------------------------------------------------------------------------------------------------------|----------------------|---------|-----------------|-----------------------|---------|-----------------|
| Gene Symbol                                             | RefSeq                      | Description                                                                                                                          | logFC<br>Con-<br>STZ | P-value | Adj.<br>P-value | logFC<br>mG4H-<br>STZ | P-value | Adj.<br>P-value |
| <b>3110009F21Rik</b>                                    | XM_001476790                | ref PREDICTED: Mus musculus RIKEN cDNA 3110009F21 gene (3110009F21Rik), mRNA [XM_001476790]                                          | -0.46                | 0.017   | 0.274           | -0.70                 | 0.007   | 0.374           |
| <b>LOC100045094</b>                                     | XM_001473657                | ref PREDICTED: Mus musculus hypothetical protein LOC100045094 (LOC100045094), mRNA [XM_001473657]                                    | -0.32                | 0.017   | 0.275           | -0.58                 | 0.005   | 0.352           |
| <b>Klra22</b>                                           | NM_053152                   | ref Mus musculus killer cell lectin-like receptor subfamily A, member 22 (Klra22), mRNA [NM_053152]                                  | -0.48                | 0.017   | 0.276           | -0.56                 | 0.008   | 0.391           |
| <b>H2-Ab1</b>                                           | NM_207105                   | ref Mus musculus histocompatibility 2, class II antigen A, beta 1 (H2-Ab1), mRNA [NM_207105]                                         | -1.02                | 0.017   | 0.276           | -1.37                 | 0.012   | 0.408           |
| <b>Atf7ip2</b>                                          | NM_029253                   | ref Mus musculus activating transcription factor 7 interacting protein 2 (Atf7ip2), transcript variant 2, mRNA [NM_029253]           | -0.29                | 0.017   | 0.276           | -0.34                 | 0.049   | 0.519           |
| <b>chr14:22267795-22319045_F</b>                        | chr14:22267795-22319045_F   | lincRNA:chr14:22267795-22319045 forward strand                                                                                       | -0.24                | 0.017   | 0.278           | -0.21                 | 0.028   | 0.476           |
| <b>Narf</b>                                             | NM_026272                   | ref Mus musculus nuclear prelamin A recognition factor (Narf), mRNA [NM_026272]                                                      | -0.38                | 0.017   | 0.278           | -0.41                 | 0.002   | 0.266           |
| <b>Gm5523</b>                                           | NR_004447                   | ref Mus musculus predicted pseudogene 5523 (Gm5523), non-coding RNA [NR_004447]                                                      | -0.36                | 0.017   | 0.278           | -0.34                 | 0.021   | 0.450           |
| <b>chr14:105987405-106063477_R</b>                      | chr14:105987405-106063477_R | lincRNA:chr14:105987405-106063477 reverse strand                                                                                     | -1.18                | 0.017   | 0.278           | -0.65                 | 0.006   | 0.361           |
| <b>Dip2b</b>                                            | NM_001159361                | ref Mus musculus DIP2 disco-interacting protein 2 homolog B (Drosophila) (Dip2b), transcript variant 1, mRNA [NM_001159361]          | -0.49                | 0.017   | 0.278           | -0.37                 | 0.003   | 0.290           |
| <b>Gm561</b>                                            | NM_001033297                | ref Mus musculus predicted gene 561 (Gm561), mRNA [NM_001033297]                                                                     | -0.25                | 0.017   | 0.278           | -0.29                 | 0.018   | 0.437           |
| <b>Gstt1</b>                                            | NM_008185                   | ref Mus musculus glutathione S-transferase, theta 1 (Gstt1), mRNA [NM_008185]                                                        | -0.30                | 0.017   | 0.278           | -0.36                 | 0.012   | 0.408           |
| <b>Gm12540</b>                                          | XR_032593                   | ref PREDICTED: Mus musculus similar to ganglioside-induced differentiation associated protein 3 (LOC100041328), misc RNA [XR_032593] | -0.27                | 0.017   | 0.279           | -0.23                 | 0.038   | 0.499           |
| <b>Tmx2</b>                                             | NM_025868                   | ref Mus musculus thioredoxin-related transmembrane protein 2 (Tmx2), mRNA [NM_025868]                                                | -0.57                | 0.017   | 0.279           | -0.62                 | 0.005   | 0.349           |

Online Supplemental Table IV: mG4H-STZ and Con-STZ Both

| Gene Symbol                | RefSeq                     | Description                                                                                                                                                       | logFC<br>Con-<br>STZ | P-value | Adj.<br>P-value | logFC<br>mG4H-<br>STZ | P-value | Adj.<br>P-value |
|----------------------------|----------------------------|-------------------------------------------------------------------------------------------------------------------------------------------------------------------|----------------------|---------|-----------------|-----------------------|---------|-----------------|
| Retnla                     | NM_020509                  | ref Mus musculus resistin like alpha (Retnla), mRNA [NM_020509]                                                                                                   | -0.87                | 0.017   | 0.279           | -1.15                 | 0.007   | 0.370           |
| 1810020D17Rik              | NM_001177946               | ref Mus musculus RIKEN cDNA 1810020D17 gene (1810020D17Rik), transcript variant 3, mRNA [NM_001177946]                                                            | -0.28                | 0.017   | 0.279           | -0.28                 | 0.023   | 0.453           |
| B230118H07Rik              | NM_026592                  | ref Mus musculus RIKEN cDNA B230118H07 gene (B230118H07Rik), mRNA [NM_026592]                                                                                     | -0.21                | 0.017   | 0.280           | -0.20                 | 0.047   | 0.515           |
| chr2:129402701-129403112_R | chr2:129402701-129403112_R | lincRNA:chr2:129402701-129403112 reverse strand                                                                                                                   | -0.48                | 0.017   | 0.280           | -0.61                 | 0.019   | 0.439           |
| Bbs10                      | NM_027914                  | ref Mus musculus Bardet-Biedl syndrome 10 (human) (Bbs10), mRNA [NM_027914]                                                                                       | -0.27                | 0.017   | 0.280           | -0.57                 | 0.014   | 0.412           |
| Mrps7                      | NM_025305                  | ref Mus musculus mitochondrial ribosomal protein S7 (Mrps7), mRNA [NM_025305]                                                                                     | -0.22                | 0.017   | 0.280           | -0.20                 | 0.047   | 0.514           |
| Gm3806                     | XM_001478568               | ref PREDICTED: Mus musculus similar to LOC434536 protein (LOC100042368), mRNA [XM_001478568]                                                                      | -0.45                | 0.017   | 0.280           | -0.78                 | 0.020   | 0.445           |
| Zfp599                     | NM_181419                  | ref Mus musculus zinc finger protein 599 (Zfp599), mRNA [NM_181419]                                                                                               | -0.64                | 0.018   | 0.280           | -0.54                 | 0.026   | 0.469           |
| chr12:55401761-55418611_F  | chr12:55401761-55418611_F  | lincRNA:chr12:55401761-55418611 forward strand                                                                                                                    | -0.63                | 0.018   | 0.281           | -0.45                 | 0.018   | 0.436           |
| Ndutf2                     | NM_001127346               | ref Mus musculus NADH dehydrogenase (ubiquinone) 1 alpha subcomplex, assembly factor 2 (Ndutf2), nuclear gene encoding mitochondrial protein, mRNA [NM_001127346] | -0.24                | 0.018   | 0.281           | -0.26                 | 0.013   | 0.412           |
| Adam17                     | NM_009615                  | ref Mus musculus a disintegrin and metalloproteinase domain 17 (Adam17), mRNA [NM_009615]                                                                         | -0.46                | 0.018   | 0.281           | -0.41                 | 0.043   | 0.511           |
| chr10:8662761-8665101_R    | chr10:8662761-8665101_R    | lincRNA:chr10:8662761-8665101 reverse strand                                                                                                                      | -1.02                | 0.018   | 0.283           | -0.80                 | 0.030   | 0.477           |
| Ngb                        | NM_022414                  | ref Mus musculus neuroglobin (Ngb), mRNA [NM_022414]                                                                                                              | -0.48                | 0.018   | 0.283           | -0.39                 | 0.027   | 0.471           |
| Mrpl13                     | NM_026759                  | ref Mus musculus mitochondrial ribosomal protein L13 (Mrpl13), nuclear gene encoding mitochondrial protein, mRNA [NM_026759]                                      | -0.24                | 0.018   | 0.283           | -0.24                 | 0.024   | 0.459           |



| Online Supplemental Table IV: mG4H-STZ and Con-STZ Both |                            |                                                                                                                                                          |                      |         |                 |                       |         |                 |
|---------------------------------------------------------|----------------------------|----------------------------------------------------------------------------------------------------------------------------------------------------------|----------------------|---------|-----------------|-----------------------|---------|-----------------|
| Gene Symbol                                             | RefSeq                     | Description                                                                                                                                              | logFC<br>Con-<br>STZ | P-value | Adj.<br>P-value | logFC<br>mG4H-<br>STZ | P-value | Adj.<br>P-value |
| Yif1a                                                   | NM_026553                  | ref Mus musculus Yip1 interacting factor homolog A (S. cerevisiae) (Yif1a), mRNA [NM_026553]                                                             | -0.30                | 0.018   | 0.283           | -0.32                 | 0.021   | 0.450           |
| chr12:82495575-82516300_F                               | chr12:82495575-82516300_F  | lincRNA:chr12:82495575-82516300 forward strand                                                                                                           | -0.22                | 0.018   | 0.284           | -0.38                 | 0.013   | 0.412           |
| Timm8b                                                  | NM_013897                  | ref Mus musculus translocase of inner mitochondrial membrane 8 homolog b (yeast) (Timm8b), nuclear gene encoding mitochondrial protein, mRNA [NM_013897] | -0.22                | 0.018   | 0.284           | -0.23                 | 0.018   | 0.435           |
| Sucla2                                                  | NM_011506                  | ref Mus musculus succinate-Coenzyme A ligase, ADP-forming, beta subunit (Sucla2), nuclear gene encoding mitochondrial protein, mRNA [NM_011506]          | -0.32                | 0.018   | 0.284           | -0.29                 | 0.039   | 0.500           |
| chr2:150072436-150074859_F                              | chr2:150072436-150074859_F | lincRNA:chr2:150072436-150074859 forward strand                                                                                                          | -0.75                | 0.018   | 0.284           | -0.45                 | 0.048   | 0.516           |
| Trp53i11                                                | NM_001025246               | ref Mus musculus transformation related protein 53 inducible protein 11 (Trp53i11), mRNA [NM_001025246]                                                  | -0.45                | 0.018   | 0.284           | -0.45                 | 0.025   | 0.463           |
| Cyb5rl                                                  | NM_175471                  | ref Mus musculus cytochrome b5 reductase-like (Cyb5rl), mRNA [NM_175471]                                                                                 | -0.30                | 0.018   | 0.284           | -0.35                 | 0.023   | 0.457           |
| chr4:128241262-128242741_F                              | chr4:128241262-128242741_F | lincRNA:chr4:128241262-128242741 forward strand                                                                                                          | -0.51                | 0.018   | 0.285           | -0.58                 | 0.045   | 0.513           |
| Ccdc123                                                 | NM_028120                  | ref Mus musculus coiled-coil domain containing 123 (Ccdc123), mRNA [NM_028120]                                                                           | -0.27                | 0.018   | 0.285           | -0.33                 | 0.006   | 0.369           |
| Vegfc                                                   | NM_009506                  | ref Mus musculus vascular endothelial growth factor C (Vegfc), mRNA [NM_009506]                                                                          | -0.31                | 0.018   | 0.286           | -0.38                 | 0.024   | 0.459           |
| ENSMUST00000070702                                      | ENSMUST00000070702         | ens coiled-coil domain containing 13 Gene [Source:MGI (curated);Acc:MGI:1920144] [ENSMUST00000070702]                                                    | -0.29                | 0.018   | 0.286           | -0.69                 | 0.031   | 0.483           |
| Pds5b                                                   | NM_175310                  | ref Mus musculus PDS5, regulator of cohesion maintenance, homolog B (S. cerevisiae) (Pds5b), mRNA [NM_175310]                                            | -0.34                | 0.018   | 0.286           | -0.46                 | 0.042   | 0.508           |
| Zfp329                                                  | NM_026046                  | ref Mus musculus zinc finger protein 329 (Zfp329), mRNA [NM_026046]                                                                                      | -0.30                | 0.018   | 0.287           | -0.55                 | 0.038   | 0.498           |
| chr10:93819821-93976621_F                               | chr10:93819821-93976621_F  | lincRNA:chr10:93819821-93976621 forward strand                                                                                                           | -0.60                | 0.019   | 0.288           | -0.63                 | 0.025   | 0.463           |

| Online Supplemental Table IV: mG4H-STZ and Con-STZ Both |                            |                                                                                                                                                                                                                                            |                      |         |                 |                       |         |                 |
|---------------------------------------------------------|----------------------------|--------------------------------------------------------------------------------------------------------------------------------------------------------------------------------------------------------------------------------------------|----------------------|---------|-----------------|-----------------------|---------|-----------------|
| Gene Symbol                                             | RefSeq                     | Description                                                                                                                                                                                                                                | logFC<br>Con-<br>STZ | P-value | Adj.<br>P-value | logFC<br>mG4H-<br>STZ | P-value | Adj.<br>P-value |
| Marcks                                                  | NM_008538                  | ref Mus musculus myristoylated alanine rich protein kinase C substrate (Marcks), mRNA [NM_008538]                                                                                                                                          | -0.35                | 0.019   | 0.288           | -0.58                 | 0.021   | 0.450           |
| Sfrs12ip1                                               | NM_026075                  | ref Mus musculus SFRS12-interacting protein 1 (Sfrs12ip1), mRNA [NM_026075]                                                                                                                                                                | -0.29                | 0.019   | 0.288           | -0.44                 | 0.045   | 0.513           |
| Ccl24                                                   | NM_019577                  | ref Mus musculus chemokine (C-C motif) ligand 24 (Ccl24), mRNA [NM_019577]                                                                                                                                                                 | -1.03                | 0.019   | 0.288           | -0.98                 | 0.015   | 0.418           |
| ENSMUST00000072904                                      | ENSMUST00000072904         | ens NHP2-like protein 1 (High mobility group-like nuclear protein 2 homolog 1)(U4/U6.U5 tri-snRNP 15.5 kDa protein)(Sperm-specific antigen 1)(Fertilization antigen 1)(FA-1) [Source:UniProtKB/Swiss-Prot;Acc:Q9D0T1] [ENSMUST00000072904] | -0.22                | 0.019   | 0.289           | -0.29                 | 0.038   | 0.499           |
| Arl6                                                    | NM_019665                  | ref Mus musculus ADP-ribosylation factor-like 6 (Arl6), mRNA [NM_019665]                                                                                                                                                                   | -0.26                | 0.019   | 0.289           | -0.40                 | 0.005   | 0.346           |
| Ush1c                                                   | NM_153677                  | ref Mus musculus Usher syndrome 1C homolog (human) (Ush1c), transcript variant b3, mRNA [NM_153677]                                                                                                                                        | -0.31                | 0.019   | 0.289           | -0.36                 | 0.011   | 0.407           |
| chrX:148720661-148763177_F                              | chrX:148720661-148763177_F | lincRNA:chrX:148720661-148763177 forward strand                                                                                                                                                                                            | -0.43                | 0.019   | 0.289           | -0.48                 | 0.021   | 0.449           |
| LOC100043927                                            | XM_001477629               | ref PREDICTED: Mus musculus similar to salivary protein 1 (LOC100047196), mRNA [XM_001477629]                                                                                                                                              | -0.31                | 0.019   | 0.290           | -0.37                 | 0.016   | 0.425           |
| ENSMUST00000106035                                      | ENSMUST00000106035         | ens coiled coil domain containing 28B Gene [Source:MGI (curated);Acc:MGI:1913514] [ENSMUST00000106035]                                                                                                                                     | -0.28                | 0.019   | 0.290           | -0.39                 | 0.015   | 0.420           |
| chr15:96091428-96115684_F                               | chr15:96091428-96115684_F  | lincRNA:chr15:96091428-96115684 forward strand                                                                                                                                                                                             | -0.49                | 0.019   | 0.290           | -0.33                 | 0.010   | 0.404           |
| Qdpr                                                    | NM_024236                  | ref Mus musculus quinoid dihydropteridine reductase (Qdpr), mRNA [NM_024236]                                                                                                                                                               | -0.24                | 0.019   | 0.291           | -0.23                 | 0.032   | 0.484           |
| chr8:19678750-20038750_F                                | chr8:19678750-20038750_F   | lincRNA:chr8:19678750-20038750 forward strand                                                                                                                                                                                              | -0.56                | 0.019   | 0.291           | -0.35                 | 0.028   | 0.474           |
| Lars2                                                   | NM_153168                  | ref Mus musculus leucyl-tRNA synthetase, mitochondrial (Lars2), nuclear gene encoding mitochondrial protein, mRNA [NM_153168]                                                                                                              | -0.73                | 0.019   | 0.291           | -0.30                 | 0.012   | 0.412           |
| Efna1                                                   | NM_010107                  | ref Mus musculus ephrin A1 (Efna1), transcript variant 1, mRNA [NM_010107]                                                                                                                                                                 | -0.33                | 0.019   | 0.291           | -0.40                 | 0.018   | 0.435           |

| Online Supplemental Table IV: mG4H-STZ and Con-STZ Both |                            |                                                                                                                                                         |                      |         |                 |                       |         |                 |
|---------------------------------------------------------|----------------------------|---------------------------------------------------------------------------------------------------------------------------------------------------------|----------------------|---------|-----------------|-----------------------|---------|-----------------|
| Gene Symbol                                             | RefSeq                     | Description                                                                                                                                             | logFC<br>Con-<br>STZ | P-value | Adj.<br>P-value | logFC<br>mG4H-<br>STZ | P-value | Adj.<br>P-value |
| Hist2h2be                                               | NM_178214                  | ref Mus musculus histone cluster 2, H2be (Hist2h2be), mRNA [NM_178214]                                                                                  | -0.54                | 0.019   | 0.292           | -0.55                 | 0.034   | 0.491           |
| Kptn                                                    | NM_133727                  | ref Mus musculus kaptin (Kptn), mRNA [NM_133727]                                                                                                        | -0.27                | 0.019   | 0.292           | -0.32                 | 0.038   | 0.499           |
| Ndufa5                                                  | NM_026614                  | ref Mus musculus NADH dehydrogenase (ubiquinone) 1 alpha subcomplex, 5 (Ndufa5), nuclear gene encoding mitochondrial protein, mRNA [NM_026614]          | -0.23                | 0.019   | 0.293           | -0.22                 | 0.040   | 0.504           |
| chr2:153163620-153170845_R                              | chr2:153163620-153170845_R | lincRNA:chr2:153163620-153170845 reverse strand                                                                                                         | -0.30                | 0.019   | 0.293           | -0.28                 | 0.046   | 0.513           |
| LOC100045150                                            | XM_001473758               | ref PREDICTED: Mus musculus hypothetical protein LOC100045150 (LOC100045150), mRNA [XM_001473758]                                                       | -0.35                | 0.019   | 0.293           | -0.27                 | 0.041   | 0.506           |
| Wrb                                                     | NM_207301                  | ref Mus musculus tryptophan rich basic protein (Wrb), mRNA [NM_207301]                                                                                  | -0.29                | 0.019   | 0.293           | -0.28                 | 0.031   | 0.480           |
| Tuba4a                                                  | NM_009447                  | ref Mus musculus tubulin, alpha 4A (Tuba4a), mRNA [NM_009447]                                                                                           | -0.71                | 0.019   | 0.293           | -0.81                 | 0.016   | 0.427           |
| chr4:119967625-119978325_F                              | chr4:119967625-119978325_F | lincRNA:chr4:119967625-119978325 forward strand                                                                                                         | -0.34                | 0.019   | 0.294           | -0.28                 | 0.024   | 0.459           |
| Pcbd1                                                   | NM_025273                  | ref Mus musculus pterin 4 alpha carbinolamine dehydratase/dimerization cofactor of hepatocyte nuclear factor 1 alpha (TCF1) 1 (Pcbd1), mRNA [NM_025273] | -0.52                | 0.019   | 0.294           | -0.63                 | 0.014   | 0.412           |
| Anp32a                                                  | NM_009672                  | ref Mus musculus acidic (leucine-rich) nuclear phosphoprotein 32 family, member A (Anp32a), mRNA [NM_009672]                                            | -0.25                | 0.020   | 0.294           | -0.23                 | 0.028   | 0.474           |
| Il1fb                                                   | NM_054079                  | ref Mus musculus interleukin 10-related T cell-derived inducible factor beta (Il1fb), mRNA [NM_054079]                                                  | -0.33                | 0.020   | 0.295           | -0.44                 | 0.012   | 0.409           |
| Nudt16l1                                                | NM_025839                  | ref Mus musculus nudix (nucleoside diphosphate linked moiety X)-type motif 16-like 1 (Nudt16l1), mRNA [NM_025839]                                       | -0.24                | 0.020   | 0.295           | -0.34                 | 0.021   | 0.449           |
| Supv3l1                                                 | NM_181423                  | ref Mus musculus suppressor of var1, 3-like 1 (S. cerevisiae) (Supv3l1), mRNA [NM_181423]                                                               | -0.35                | 0.020   | 0.295           | -0.26                 | 0.048   | 0.516           |
| Pigz                                                    | NM_172822                  | ref Mus musculus phosphatidylinositol glycan anchor biosynthesis, class Z (Pigz), mRNA [NM_172822]                                                      | -0.57                | 0.020   | 0.295           | -0.76                 | 0.005   | 0.353           |

Online Supplemental Table IV: mG4H-STZ and Con-STZ Both

| Gene Symbol   | RefSeq             | Description                                                                                                                                | logFC<br>Con-<br>STZ | P-value | Adj.<br>P-value | logFC<br>mG4H-<br>STZ | P-value | Adj.<br>P-value |
|---------------|--------------------|--------------------------------------------------------------------------------------------------------------------------------------------|----------------------|---------|-----------------|-----------------------|---------|-----------------|
| Lgals1        | NM_008495          | ref Mus musculus lectin, galactose binding, soluble 1 (Lgals1), mRNA [NM_008495]                                                           | -0.34                | 0.020   | 0.295           | -0.48                 | 0.016   | 0.427           |
| 0610040J01Rik | NM_029554          | ref Mus musculus RIKEN cDNA 0610040J01 gene (0610040J01Rik), mRNA [NM_029554]                                                              | -1.02                | 0.020   | 0.295           | -0.97                 | 0.002   | 0.281           |
| Slc38a9       | NM_178746          | ref Mus musculus solute carrier family 38, member 9 (Slc38a9), mRNA [NM_178746]                                                            | -0.34                | 0.020   | 0.296           | -0.55                 | 0.020   | 0.444           |
| Klra16        | NM_013794          | ref Mus musculus killer cell lectin-like receptor, subfamily A, member 16 (Klra16), mRNA [NM_013794]                                       | -0.45                | 0.020   | 0.296           | -0.75                 | 0.002   | 0.270           |
| Fbxl22        | NM_175206          | ref Mus musculus F-box and leucine-rich repeat protein 22 (Fbxl22), mRNA [NM_175206]                                                       | -0.64                | 0.020   | 0.297           | -0.52                 | 0.008   | 0.391           |
| Alas1         | NM_020559          | ref Mus musculus aminolevulinic acid synthase 1 (Alas1), mRNA [NM_020559]                                                                  | -0.46                | 0.020   | 0.298           | -0.51                 | 0.016   | 0.425           |
| Oxnad1        | NM_145460          | ref Mus musculus oxidoreductase NAD-binding domain containing 1 (Oxnad1), mRNA [NM_145460]                                                 | -0.35                | 0.020   | 0.299           | -0.29                 | 0.048   | 0.516           |
| Hist2h2aa2    | NM_178212          | ref Mus musculus histone cluster 2, H2aa2 (Hist2h2aa2), mRNA [NM_178212]                                                                   | -0.28                | 0.020   | 0.300           | -0.28                 | 0.048   | 0.518           |
| Mtrf1l        | NM_175374          | ref Mus musculus mitochondrial translational release factor 1-like (Mtrf1l), nuclear gene encoding mitochondrial protein, mRNA [NM_175374] | -0.34                | 0.020   | 0.300           | -0.45                 | 0.011   | 0.407           |
| 9030612E09Rik | NM_172419          | ref Mus musculus RIKEN cDNA 9030612E09 gene (9030612E09Rik), mRNA [NM_172419]                                                              | -0.57                | 0.020   | 0.300           | -0.42                 | 0.039   | 0.500           |
| Mrpl4         | NM_023167          | ref Mus musculus mitochondrial ribosomal protein L4 (Mrpl4), nuclear gene encoding mitochondrial protein, mRNA [NM_023167]                 | -0.24                | 0.020   | 0.301           | -0.19                 | 0.047   | 0.515           |
| Lmod3         | NM_001081157       | ref Mus musculus leiomodoin 3 (fetal) (Lmod3), mRNA [NM_001081157]                                                                         | -1.06                | 0.020   | 0.301           | -1.07                 | 0.013   | 0.412           |
| Lpcat1        | ENSMUST00000022099 | ens lysophosphatidylcholine acyltransferase 1 Gene [Source:MGI (curated);Acc:MGI:2384812] [ENSMUST00000022099]                             | -0.44                | 0.020   | 0.301           | -0.43                 | 0.013   | 0.412           |
| H2afj         | NM_177688          | ref Mus musculus H2A histone family, member J (H2afj), mRNA [NM_177688]                                                                    | -0.32                | 0.020   | 0.302           | -0.26                 | 0.045   | 0.513           |

| Online Supplemental Table IV: mG4H-STZ and Con-STZ Both |                            |                                                                                                                                                       |                      |         |                 |                       |         |                 |
|---------------------------------------------------------|----------------------------|-------------------------------------------------------------------------------------------------------------------------------------------------------|----------------------|---------|-----------------|-----------------------|---------|-----------------|
| Gene Symbol                                             | RefSeq                     | Description                                                                                                                                           | logFC<br>Con-<br>STZ | P-value | Adj.<br>P-value | logFC<br>mG4H-<br>STZ | P-value | Adj.<br>P-value |
| <b>Ltbp4</b>                                            | NM_175641                  | ref Mus musculus latent transforming growth factor beta binding protein 4 (Ltbp4), transcript variant 1, mRNA [NM_175641]                             | -0.30                | 0.020   | 0.302           | -0.47                 | 0.021   | 0.449           |
| <b>chr4:119932321-119932513_R</b>                       | chr4:119932321-119932513_R | lincRNA:chr4:119932321-119932513 reverse strand                                                                                                       | -0.56                | 0.021   | 0.302           | -0.49                 | 0.029   | 0.477           |
| <b>Mtf2</b>                                             | NM_013827                  | ref Mus musculus metal response element binding transcription factor 2 (Mtf2), mRNA [NM_013827]                                                       | -0.93                | 0.021   | 0.302           | -0.62                 | 0.003   | 0.302           |
| <b>Dnahc2</b>                                           | NM_001081330               | ref Mus musculus dynein, axonemal, heavy chain 2 (Dnahc2), mRNA [NM_001081330]                                                                        | -0.60                | 0.021   | 0.302           | -0.48                 | 0.014   | 0.414           |
| <b>Plxdc1</b>                                           | NM_001163608               | ref Mus musculus plexin domain containing 1 (Plxdc1), transcript variant 1, mRNA [NM_001163608]                                                       | -0.41                | 0.021   | 0.302           | -0.50                 | 0.014   | 0.418           |
| <b>Col24a1</b>                                          | NM_027770                  | ref Mus musculus collagen, type XXIV, alpha 1 (Col24a1), mRNA [NM_027770]                                                                             | -0.53                | 0.021   | 0.303           | -0.47                 | 0.013   | 0.412           |
| <b>H2-Eb1</b>                                           | NM_010382                  | ref Mus musculus histocompatibility 2, class II antigen E beta (H2-Eb1), mRNA [NM_010382]                                                             | -0.62                | 0.021   | 0.303           | -0.83                 | 0.011   | 0.406           |
| <b>Cnih</b>                                             | NM_009919                  | ref Mus musculus comichon homolog (Drosophila) (Cnih), mRNA [NM_009919]                                                                               | -0.24                | 0.021   | 0.303           | -0.38                 | 0.034   | 0.493           |
| <b>chrX:131558071-131594875_R</b>                       | chrX:131558071-131594875_R | lincRNA:chrX:131558071-131594875 reverse strand                                                                                                       | -0.66                | 0.021   | 0.304           | -0.45                 | 0.036   | 0.495           |
| <b>Ston2</b>                                            | NM_175367                  | ref Mus musculus stonin 2 (Ston2), mRNA [NM_175367]                                                                                                   | -0.52                | 0.021   | 0.304           | -0.54                 | 0.004   | 0.325           |
| <b>6430550D23Rik</b>                                    | NM_001145351               | ref Mus musculus RIKEN cDNA 6430550D23 gene (6430550D23Rik), transcript variant 1, mRNA [NM_001145351]                                                | -0.47                | 0.021   | 0.306           | -0.38                 | 0.038   | 0.499           |
| <b>Gm5525</b>                                           | XM_484844                  | ref PREDICTED: Mus musculus predicted gene, EG433283, transcript variant 1 (EG433283), mRNA [XM_484844]                                               | -0.22                | 0.021   | 0.306           | -0.28                 | 0.027   | 0.472           |
| <b>Naa10</b>                                            | NM_001177965               | ref Mus musculus N(alpha)-acetyltransferase 10, NatA catalytic subunit Nalpha acetyltransferase 10 (Naa10), transcript variant 2, mRNA [NM_001177965] | -0.32                | 0.021   | 0.307           | -0.28                 | 0.027   | 0.472           |
| <b>Mrps14</b>                                           | NM_025474                  | ref Mus musculus mitochondrial ribosomal protein S14 (Mrps14), nuclear gene encoding mitochondrial protein, mRNA [NM_025474]                          | -0.24                | 0.021   | 0.308           | -0.25                 | 0.036   | 0.495           |

Online Supplemental Table IV: mG4H-STZ and Con-STZ Both

| Gene Symbol                     | RefSeq                   | Description                                                                                                                             | logFC<br>Con-<br>STZ | P-value | Adj.<br>P-value | logFC<br>mG4H-<br>STZ | P-value | Adj.<br>P-value |
|---------------------------------|--------------------------|-----------------------------------------------------------------------------------------------------------------------------------------|----------------------|---------|-----------------|-----------------------|---------|-----------------|
| <b>LOC100233175</b>             | NM_001142938             | ref Mus musculus hypothetical protein LOC100233175 (LOC100233175), transcript variant 1, mRNA [NM_001142938]                            | -0.24                | 0.021   | 0.309           | -0.29                 | 0.016   | 0.426           |
| <b>Ccnd2</b>                    | NM_009829                | ref Mus musculus cyclin D2 (Ccnd2), mRNA [NM_009829]                                                                                    | -0.37                | 0.022   | 0.310           | -0.54                 | 0.002   | 0.279           |
| <b>Apba3</b>                    | NM_018758                | ref Mus musculus amyloid beta (A4) precursor protein-binding, family A, member 3 (Apba3), mRNA [NM_018758]                              | -0.25                | 0.022   | 0.310           | -0.23                 | 0.048   | 0.516           |
| <b>Gpn1</b>                     | NM_133756                | ref Mus musculus GPN-loop GTPase 1 (Gpn1), mRNA [NM_133756]                                                                             | -0.24                | 0.022   | 0.310           | -0.24                 | 0.038   | 0.499           |
| <b>chr9:40270437-40271031_R</b> | chr9:40270437-40271031_R | lincRNA:chr9:40270437-40271031 reverse strand                                                                                           | -0.60                | 0.022   | 0.310           | -0.49                 | 0.018   | 0.435           |
| <b>Ifi203</b>                   | NM_001045481             | ref Mus musculus interferon activated gene 203 (Ifi203), transcript variant 1, mRNA [NM_001045481]                                      | -0.80                | 0.022   | 0.310           | -0.62                 | 0.026   | 0.470           |
| <b>Fam55b</b>                   | NM_030069                | ref Mus musculus family with sequence similarity 55, member B (Fam55b), mRNA [NM_030069]                                                | -0.40                | 0.022   | 0.310           | -0.57                 | 0.003   | 0.299           |
| <b>Tfrc</b>                     | NM_011638                | ref Mus musculus transferrin receptor (Tfrc), mRNA [NM_011638]                                                                          | -1.29                | 0.022   | 0.310           | -1.49                 | 0.010   | 0.406           |
| <b>Gm10244</b>                  | ENSMUST00000090237       | ens Putative uncharacterized protein AnMKRN1 [Source:UniProtKB/TrEMBL;Acc:Q65Z89] [ENSMUST00000090237]                                  | -0.38                | 0.022   | 0.310           | -0.52                 | 0.002   | 0.266           |
| <b>Akr1c14</b>                  | NM_134072                | ref Mus musculus aldo-keto reductase family 1, member C14 (Akr1c14), mRNA [NM_134072]                                                   | -0.42                | 0.022   | 0.311           | -0.65                 | 0.015   | 0.418           |
| <b>Timm44</b>                   | NM_011592                | ref Mus musculus translocase of inner mitochondrial membrane 44 (Timm44), nuclear gene encoding mitochondrial protein, mRNA [NM_011592] | -0.28                | 0.022   | 0.311           | -0.22                 | 0.048   | 0.516           |
| <b>Gm2867</b>                   | XM_001474985             | ref PREDICTED: Mus musculus hypothetical protein LOC100040616 (LOC100040616), mRNA [XM_001474985]                                       | -0.75                | 0.022   | 0.312           | -0.38                 | 0.034   | 0.493           |
| <b>4931428F04Rik</b>            | NM_028888                | ref Mus musculus RIKEN cDNA 4931428F04 gene (4931428F04Rik), transcript variant 1, mRNA [NM_028888]                                     | -0.62                | 0.022   | 0.314           | -0.65                 | 0.033   | 0.487           |

Online Supplemental Table IV: mG4H-STZ and Con-STZ Both

| Gene Symbol                       | RefSeq                     | Description                                                                                                                                             | logFC<br>Con-STZ | P-value | Adj.<br>P-value | logFC<br>mG4H-STZ | P-value | Adj.<br>P-value |
|-----------------------------------|----------------------------|---------------------------------------------------------------------------------------------------------------------------------------------------------|------------------|---------|-----------------|-------------------|---------|-----------------|
| <b>Ltbp4</b>                      | NM_175641                  | ref Mus musculus latent transforming growth factor beta binding protein 4 (Ltbp4), transcript variant 1, mRNA [NM_175641]                               | -0.30            | 0.022   | 0.314           | -0.53             | 0.014   | 0.415           |
| <b>Slc25a40</b>                   | ENSMUST00000066921         | ens solute carrier family 25, member 40 Gene [Source:MGI Symbol;Acc:MGI:2442486] [ENSMUST00000066921]                                                   | -0.85            | 0.022   | 0.314           | -0.69             | 0.011   | 0.406           |
| <b>LOC553090</b>                  | AK081940                   | gb Mus musculus 16 days embryo head cDNA, RIKEN full-length enriched library, clone:C130088L03 product:unclassifiable, full insert sequence. [AK081940] | -0.28            | 0.022   | 0.315           | -0.38             | 0.029   | 0.477           |
| <b>chr1:85304494-85305390_R</b>   | chr1:85304494-85305390_R   | lincRNA:chr1:85304494-85305390 reverse strand                                                                                                           | -0.50            | 0.022   | 0.315           | -0.76             | 0.006   | 0.361           |
| <b>Nudt6</b>                      | NM_153561                  | ref Mus musculus nudix (nucleoside diphosphate linked moiety X)-type motif 6 (Nudt6), mRNA [NM_153561]                                                  | -0.34            | 0.022   | 0.316           | -0.30             | 0.015   | 0.421           |
| <b>Ube2a</b>                      | NM_019668                  | ref Mus musculus ubiquitin-conjugating enzyme E2A, RAD6 homolog (S. cerevisiae) (Ube2a), mRNA [NM_019668]                                               | -0.25            | 0.022   | 0.316           | -0.35             | 0.013   | 0.412           |
| <b>chr1:138442536-138520766_R</b> | chr1:138442536-138520766_R | lincRNA:chr1:138442536-138520766 reverse strand                                                                                                         | -0.40            | 0.023   | 0.316           | -1.09             | 0.006   | 0.361           |
| <b>M97158</b>                     | M97158                     | gb Mouse T cell receptor mRNA. [M97158]                                                                                                                 | -0.55            | 0.023   | 0.317           | -0.46             | 0.029   | 0.477           |
| <b>2810055F11Rik</b>              | NM_026038                  | ref Mus musculus RIKEN cDNA 2810055F11 gene (2810055F11Rik), mRNA [NM_026038]                                                                           | -0.27            | 0.023   | 0.317           | -0.43             | 0.021   | 0.449           |
| <b>Snx22</b>                      | NM_001025612               | ref Mus musculus sorting nexin 22 (Snx22), mRNA [NM_001025612]                                                                                          | -0.26            | 0.023   | 0.317           | -0.23             | 0.026   | 0.471           |
| <b>chr1:167515313-167516122_F</b> | chr1:167515313-167516122_F | lincRNA:chr1:167515313-167516122 forward strand                                                                                                         | -0.34            | 0.023   | 0.318           | -0.56             | 0.007   | 0.374           |
| <b>H2-Ab1</b>                     | NM_207105                  | ref Mus musculus histocompatibility 2, class II antigen A, beta 1 (H2-Ab1), mRNA [NM_207105]                                                            | -0.99            | 0.023   | 0.318           | -1.26             | 0.012   | 0.408           |
| <b>Ppif</b>                       | NM_134084                  | ref Mus musculus peptidylprolyl isomerase F (cyclophilin F) (Ppif), nuclear gene encoding mitochondrial protein, mRNA [NM_134084]                       | -0.36            | 0.023   | 0.318           | -0.36             | 0.027   | 0.473           |
| <b>Cxx1c</b>                      | NM_028375                  | ref Mus musculus CAAX box 1 homolog C (human) (Cxx1c), mRNA [NM_028375]                                                                                 | -0.35            | 0.023   | 0.318           | -0.43             | 0.014   | 0.412           |



Online Supplemental Table IV: mG4H-STZ and Con-STZ Both

| Gene Symbol                       | RefSeq                     | Description                                                                                             | logFC<br>Con-<br>STZ | P-value | Adj.<br>P-value | logFC<br>mG4H-<br>STZ | P-value | Adj.<br>P-value |
|-----------------------------------|----------------------------|---------------------------------------------------------------------------------------------------------|----------------------|---------|-----------------|-----------------------|---------|-----------------|
| <b>ENSMUST00000100708</b>         | ENSMUST00000100708         | ref PREDICTED: Mus musculus hypothetical LOC665933 (LOC665933), misc RNA [XR_031751]                    | -0.30                | 0.023   | 0.318           | -0.41                 | 0.017   | 0.435           |
| <b>Ccdc83</b>                     | NM_029256                  | ref Mus musculus coiled-coil domain containing 83 (Ccdc83), mRNA [NM_029256]                            | -0.81                | 0.023   | 0.318           | -0.74                 | 0.008   | 0.392           |
| <b>Mtr</b>                        | NM_001081128               | ref Mus musculus 5-methyltetrahydrofolate-homocysteine methyltransferase (Mtr), mRNA [NM_001081128]     | -0.24                | 0.023   | 0.319           | -0.24                 | 0.042   | 0.508           |
| <b>Hn1l</b>                       | NM_198937                  | ref Mus musculus hematological and neurological expressed 1-like (Hn1l), mRNA [NM_198937]               | -0.31                | 0.023   | 0.319           | -0.48                 | 0.006   | 0.369           |
| <b>Lsm7</b>                       | NM_025349                  | ref Mus musculus LSM7 homolog, U6 small nuclear RNA associated (S. cerevisiae) (Lsm7), mRNA [NM_025349] | -0.24                | 0.023   | 0.319           | -0.36                 | 0.025   | 0.467           |
| <b>chr17:26613904-26614277_F</b>  | chr17:26613904-26614277_F  | lincRNA:chr17:26613904-26614277 forward strand                                                          | -1.09                | 0.023   | 0.320           | -1.17                 | 0.022   | 0.452           |
| <b>Flywch2</b>                    | NM_029798                  | ref Mus musculus FLYWCH family member 2 (Flywch2), mRNA [NM_029798]                                     | -0.32                | 0.023   | 0.320           | -0.26                 | 0.045   | 0.513           |
| <b>Lst1</b>                       | NM_010734                  | ref Mus musculus leukocyte specific transcript 1 (Lst1), mRNA [NM_010734]                               | -0.50                | 0.023   | 0.320           | -0.52                 | 0.048   | 0.516           |
| <b>chr3:19179899-19216399_R</b>   | chr3:19179899-19216399_R   | lincRNA:chr3:19179899-19216399 reverse strand                                                           | -0.60                | 0.023   | 0.321           | -0.42                 | 0.044   | 0.512           |
| <b>Rnf7</b>                       | NM_011279                  | ref Mus musculus ring finger protein 7 (Rnf7), mRNA [NM_011279]                                         | -0.26                | 0.023   | 0.321           | -0.36                 | 0.017   | 0.435           |
| <b>chrX:165792277-165807952_R</b> | chrX:165792277-165807952_R | lincRNA:chrX:165792277-165807952 reverse strand                                                         | -0.39                | 0.023   | 0.321           | -0.51                 | 0.044   | 0.511           |
| <b>chr1:52507374-52514124_F</b>   | chr1:52507374-52514124_F   | lincRNA:chr1:52507374-52514124 forward strand                                                           | -1.09                | 0.024   | 0.323           | -0.58                 | 0.003   | 0.303           |
| <b>chr2:94046243-94070067_F</b>   | chr2:94046243-94070067_F   | lincRNA:chr2:94046243-94070067 forward strand                                                           | -0.32                | 0.024   | 0.323           | -0.42                 | 0.005   | 0.353           |
| <b>1810012P15Rik</b>              | NM_001076681               | ref Mus musculus RIKEN cDNA 1810012P15 gene (1810012P15Rik), mRNA [NM_001076681]                        | -0.49                | 0.024   | 0.325           | -0.41                 | 0.010   | 0.406           |
| <b>Cbr4</b>                       | NM_145595                  | ref Mus musculus carbonyl reductase 4 (Cbr4), mRNA [NM_145595]                                          | -0.29                | 0.024   | 0.325           | -0.23                 | 0.049   | 0.518           |
| <b>chr14:77511189-77522852_F</b>  | chr14:77511189-77522852_F  | lincRNA:chr14:77511189-77522852 forward strand                                                          | -0.41                | 0.024   | 0.326           | -0.49                 | 0.002   | 0.270           |

Online Supplemental Table IV: mG4H-STZ and Con-STZ Both

| Gene Symbol                          | RefSeq                       | Description                                                                                                                                                                                                                             | logFC<br>Con-<br>STZ | P-value | Adj.<br>P-value | logFC<br>mG4H-<br>STZ | P-value | Adj.<br>P-value |
|--------------------------------------|------------------------------|-----------------------------------------------------------------------------------------------------------------------------------------------------------------------------------------------------------------------------------------|----------------------|---------|-----------------|-----------------------|---------|-----------------|
| <b>Mrps7</b>                         | NM_025305                    | ref Mus musculus mitochondrial ribosomal protein S7 (Mrps7), mRNA [NM_025305]                                                                                                                                                           | -0.28                | 0.024   | 0.327           | -0.29                 | 0.042   | 0.509           |
| <b>Siglech</b>                       | NM_178706                    | ref Mus musculus sialic acid binding Ig-like lectin H (Siglech), mRNA [NM_178706]                                                                                                                                                       | -0.55                | 0.024   | 0.327           | -0.65                 | 0.037   | 0.496           |
| <b>Rnpep</b>                         | NM_145417                    | ref Mus musculus arginyl aminopeptidase (aminopeptidase B) (Rnpep), transcript variant 1, mRNA [NM_145417]                                                                                                                              | -0.28                | 0.024   | 0.327           | -0.49                 | 0.025   | 0.463           |
| <b>Gnb5</b>                          | NM_010313                    | ref Mus musculus guanine nucleotide binding protein (G protein), beta 5 (Gnb5), transcript variant 1, mRNA [NM_010313]                                                                                                                  | -0.28                | 0.024   | 0.328           | -0.35                 | 0.034   | 0.493           |
| <b>Ankrd37</b>                       | NM_001039562                 | ref Mus musculus ankyrin repeat domain 37 (Ankrd37), mRNA [NM_001039562]                                                                                                                                                                | -0.37                | 0.024   | 0.328           | -0.55                 | 0.043   | 0.509           |
| <b>Ppfia4</b>                        | NM_001144855                 | ref Mus musculus protein tyrosine phosphatase, receptor type, f polypeptide (PTPRF), interacting protein (liprin), alpha 4 (Ppfia4), mRNA [NM_001144855]                                                                                | -0.49                | 0.024   | 0.328           | -0.42                 | 0.031   | 0.483           |
| <b>Eaf1</b>                          | NM_028932                    | ref Mus musculus ELL associated factor 1 (Eaf1), mRNA [NM_028932]                                                                                                                                                                       | -0.27                | 0.025   | 0.330           | -0.28                 | 0.036   | 0.495           |
| <b>Rcn2</b>                          | NM_011992                    | ref Mus musculus reticulocalbin 2 (Rcn2), mRNA [NM_011992]                                                                                                                                                                              | -0.23                | 0.025   | 0.330           | -0.25                 | 0.023   | 0.453           |
| <b>Slc9a3</b>                        | AK033564                     | gb Mus musculus adult male colon cDNA, RIKEN full-length enriched library, clone:9030624O13<br>product:SODIUM/HYDROGEN EXCHANGER 3 (NA(+)/H(+)<br>EXCHANGER 3) (NHE-3) homolog [Rattus norvegicus], full<br>insert sequence. [AK033564] | -0.54                | 0.025   | 0.330           | -0.57                 | 0.013   | 0.412           |
| <b>chr9:96664617-<br/>96683617_R</b> | chr9:96664617-<br>96683617_R | lincRNA:chr9:96664617-96683617 reverse strand                                                                                                                                                                                           | -0.24                | 0.025   | 0.330           | -0.33                 | 0.029   | 0.477           |
| <b>Mrps2</b>                         | NM_080452                    | ref Mus musculus mitochondrial ribosomal protein S2 (Mrps2), nuclear gene encoding mitochondrial protein, transcript variant 1, mRNA [NM_080452]                                                                                        | -0.25                | 0.025   | 0.330           | -0.26                 | 0.039   | 0.501           |
| <b>Gmppb</b>                         | NM_177910                    | ref Mus musculus GDP-mannose pyrophosphorylase B (Gmppb), mRNA [NM_177910]                                                                                                                                                              | -0.32                | 0.025   | 0.331           | -0.44                 | 0.020   | 0.441           |

| Online Supplemental Table IV: mG4H-STZ and Con-STZ Both |                           |                                                                                                                   |                      |         |                 |                       |         |                 |
|---------------------------------------------------------|---------------------------|-------------------------------------------------------------------------------------------------------------------|----------------------|---------|-----------------|-----------------------|---------|-----------------|
| Gene Symbol                                             | RefSeq                    | Description                                                                                                       | logFC<br>Con-<br>STZ | P-value | Adj.<br>P-value | logFC<br>mG4H-<br>STZ | P-value | Adj.<br>P-value |
| Asb12                                                   | NM_080858                 | ref Mus musculus ankyrin repeat and SOCS box-containing 12 (Asb12), mRNA [NM_080858]                              | -0.77                | 0.025   | 0.331           | -0.38                 | 0.043   | 0.510           |
| chr8:49237358-49246495_F                                | chr8:49237358-49246495_F  | lincRNA:chr8:49237358-49246495 forward strand                                                                     | -0.61                | 0.025   | 0.332           | -1.01                 | 0.010   | 0.404           |
| S1pr3                                                   | NM_010101                 | ref Mus musculus sphingosine-1-phosphate receptor 3 (S1pr3), mRNA [NM_010101]                                     | -0.33                | 0.025   | 0.332           | -0.48                 | 0.048   | 0.517           |
| ENSMUST00000087056                                      | ENSMUST00000087056        | ens spermatogenesis associated, serine-rich 1 Gene [Source:MGI Symbol;Acc:MGI:1918270] [ENSMUST00000087056]       | -0.49                | 0.025   | 0.332           | -0.74                 | 0.005   | 0.341           |
| chr6:11994002-11997859_F                                | chr6:11994002-11997859_F  | lincRNA:chr6:11994002-11997859 forward strand                                                                     | -0.30                | 0.025   | 0.332           | -0.30                 | 0.034   | 0.493           |
| Pla2g2d                                                 | NM_011109                 | ref Mus musculus phospholipase A2, group IID (Pla2g2d), mRNA [NM_011109]                                          | -0.84                | 0.025   | 0.332           | -0.94                 | 0.011   | 0.407           |
| chr17:8719950-8783850_F                                 | chr17:8719950-8783850_F   | lincRNA:chr17:8719950-8783850 forward strand                                                                      | -0.30                | 0.025   | 0.332           | -0.45                 | 0.021   | 0.448           |
| Srrm3                                                   | NM_021403                 | ref Mus musculus serine/arginine repetitive matrix 3 (Srrm3), mRNA [NM_021403]                                    | -0.40                | 0.025   | 0.332           | -0.36                 | 0.028   | 0.474           |
| Hspe1                                                   | NM_008303                 | ref Mus musculus heat shock protein 1 (chaperonin 10) (Hspe1), mRNA [NM_008303]                                   | -0.22                | 0.025   | 0.332           | -0.37                 | 0.003   | 0.281           |
| Cd83                                                    | NM_009856                 | ref Mus musculus CD83 antigen (Cd83), mRNA [NM_009856]                                                            | -0.47                | 0.025   | 0.334           | -0.81                 | 0.025   | 0.467           |
| Nr2f6                                                   | NM_010150                 | ref Mus musculus nuclear receptor subfamily 2, group F, member 6 (Nr2f6), mRNA [NM_010150]                        | -0.24                | 0.025   | 0.334           | -0.20                 | 0.040   | 0.502           |
| D3Ert751e                                               | NM_027271                 | ref Mus musculus DNA segment, Chr 3, ERATO Doi 751, expressed (D3Ert751e), transcript variant 3, mRNA [NM_027271] | -0.43                | 0.026   | 0.335           | -0.46                 | 0.009   | 0.398           |
| Gabrg3                                                  | NM_008074                 | ref Mus musculus gamma-aminobutyric acid (GABA) A receptor, subunit gamma 3 (Gabrg3), mRNA [NM_008074]            | -0.46                | 0.026   | 0.335           | -0.33                 | 0.050   | 0.520           |
| chr12:85210777-85262127_F                               | chr12:85210777-85262127_F | lincRNA:chr12:85210777-85262127 forward strand                                                                    | -0.35                | 0.026   | 0.335           | -0.76                 | 0.001   | 0.177           |
| Gbp9                                                    | NM_172777                 | ref Mus musculus guanylate-binding protein 9 (Gbp9), mRNA [NM_172777]                                             | -0.47                | 0.026   | 0.337           | -0.61                 | 0.042   | 0.507           |

Online Supplemental Table IV: mG4H-STZ and Con-STZ Both

| Gene Symbol                        | RefSeq                      | Description                                                                                                                                                              | logFC<br>Con-<br>STZ | P-value | Adj.<br>P-value | logFC<br>mG4H-<br>STZ | P-value | Adj.<br>P-value |
|------------------------------------|-----------------------------|--------------------------------------------------------------------------------------------------------------------------------------------------------------------------|----------------------|---------|-----------------|-----------------------|---------|-----------------|
| <b>Slc26a10</b>                    | NM_177615                   | ref[Mus musculus solute carrier family 26, member 10 (Slc26a10), mRNA [NM_177615]                                                                                        | -0.39                | 0.026   | 0.338           | -0.44                 | 0.046   | 0.513           |
| <b>Gm1833</b>                      | XM_129965                   | ref[PREDICTED: Mus musculus gene model 1833, (NCBI) (Gm1833), mRNA [XM_129965]                                                                                           | -0.29                | 0.026   | 0.339           | -0.28                 | 0.018   | 0.436           |
| <b>Lce1i</b>                       | NM_029667                   | ref[Mus musculus late cornified envelope 1l (Lce1i), mRNA [NM_029667]                                                                                                    | -0.62                | 0.026   | 0.340           | -0.58                 | 0.040   | 0.504           |
| <b>Cstf1</b>                       | ENSMUST00000116375          | ens[cleavage stimulation factor, 3' pre-RNA, subunit 1 Gene [Source:MGI (curated);Acc:MGI:1914587] [ENSMUST00000116375]                                                  | -0.26                | 0.026   | 0.340           | -0.34                 | 0.046   | 0.513           |
| <b>Gm12216</b>                     | NR_033332                   | ref[Mus musculus predicted gene 12216 (Gm12216), non-coding RNA [NR_033332]                                                                                              | -0.59                | 0.027   | 0.342           | -0.43                 | 0.047   | 0.516           |
| <b>Gm4979</b>                      | NM_001142411                | ref[Mus musculus predicted gene 4979 (Gm4979), mRNA [NM_001142411]                                                                                                       | -0.44                | 0.027   | 0.342           | -0.57                 | 0.021   | 0.450           |
| <b>A730056A06Rik</b>               | AK053954                    | gb[Mus musculus 2 days pregnant adult female oviduct cDNA, RIKEN full-length enriched library, clone:E230007B11 product:unclassifiable, full insert sequence. [AK053954] | -0.47                | 0.027   | 0.342           | -0.46                 | 0.006   | 0.356           |
| <b>Med20</b>                       | NM_020048                   | ref[Mus musculus mediator complex subunit 20 (Med20), mRNA [NM_020048]                                                                                                   | -0.26                | 0.027   | 0.343           | -0.31                 | 0.042   | 0.508           |
| <b>Nrg4</b>                        | NM_032002                   | ref[Mus musculus neuregulin 4 (Nrg4), mRNA [NM_032002]                                                                                                                   | -0.74                | 0.027   | 0.343           | -0.86                 | 0.014   | 0.414           |
| <b>Cmtm5</b>                       | NM_026066                   | ref[Mus musculus CKLF-like MARVEL transmembrane domain containing 5 (Cmtm5), mRNA [NM_026066]                                                                            | -0.35                | 0.027   | 0.344           | -0.42                 | 0.013   | 0.412           |
| <b>Slfn1</b>                       | NM_011407                   | ref[Mus musculus schlafen 1 (Slfn1), mRNA [NM_011407]                                                                                                                    | -0.83                | 0.027   | 0.344           | -0.46                 | 0.016   | 0.426           |
| <b>ENSMUST00000109220</b>          | ENSMUST00000109220          | ens[sarcoglycan, delta (dystrophin-associated glycoprotein) Gene [Source:MGI (curated);Acc:MGI:1346525] [ENSMUST00000109220]                                             | -0.86                | 0.027   | 0.344           | -0.92                 | 0.002   | 0.251           |
| <b>Copz2</b>                       | NM_019877                   | ref[Mus musculus coatomer protein complex, subunit zeta 2 (Copz2), mRNA [NM_019877]                                                                                      | -0.21                | 0.027   | 0.345           | -0.37                 | 0.008   | 0.391           |
| <b>Msl3</b>                        | NM_010832                   | ref[Mus musculus male-specific lethal 3 homolog (Drosophila) (Msl3), mRNA [NM_010832]                                                                                    | -0.24                | 0.027   | 0.346           | -0.32                 | 0.022   | 0.452           |
| <b>chr10:120336296-120354471_F</b> | chr10:120336296-120354471_F | lincRNA:chr10:120336296-120354471 forward strand                                                                                                                         | -0.27                | 0.027   | 0.346           | -0.36                 | 0.046   | 0.513           |

| Online Supplemental Table IV: mG4H-STZ and Con-STZ Both |                             |                                                                                                                                                    |                      |         |                 |                       |         |                 |
|---------------------------------------------------------|-----------------------------|----------------------------------------------------------------------------------------------------------------------------------------------------|----------------------|---------|-----------------|-----------------------|---------|-----------------|
| Gene Symbol                                             | RefSeq                      | Description                                                                                                                                        | logFC<br>Con-<br>STZ | P-value | Adj.<br>P-value | logFC<br>mG4H-<br>STZ | P-value | Adj.<br>P-value |
| <b>Mrps33</b>                                           | NM_010270                   | ref Mus musculus mitochondrial ribosomal protein S33 (Mrps33), nuclear gene encoding mitochondrial protein, transcript variant 1, mRNA [NM_010270] | -0.62                | 0.027   | 0.347           | -0.25                 | 0.032   | 0.483           |
| <b>ENSMUST00000122210</b>                               | ENSMUST00000122210          | ens profilin 2 Gene [Source:MGI (curated);Acc:MGI:97550] [ENSMUST00000122210]                                                                      | -0.26                | 0.027   | 0.347           | -0.36                 | 0.045   | 0.513           |
| <b>LOC100048608</b>                                     | XM_001480368                | ref PREDICTED: Mus musculus hypothetical protein LOC100048608 (LOC100048608), mRNA [XM_001480368]                                                  | -0.38                | 0.027   | 0.348           | -0.86                 | 0.040   | 0.501           |
| <b>Trip12</b>                                           | NM_133975                   | ref Mus musculus thyroid hormone receptor interactor 12 (Trip12), mRNA [NM_133975]                                                                 | -0.26                | 0.027   | 0.348           | -0.34                 | 0.009   | 0.394           |
| <b>chr13:74712805-74729233_R</b>                        | chr13:74712805-74729233_R   | lincRNA:chr13:74712805-74729233 reverse strand                                                                                                     | -0.41                | 0.028   | 0.348           | -0.75                 | 0.013   | 0.412           |
| <b>LOC100047464</b>                                     | XM_001478202                | ref PREDICTED: Mus musculus hypothetical protein LOC100047464 (LOC100047464), mRNA [XM_001478202]                                                  | -0.56                | 0.028   | 0.348           | -0.48                 | 0.032   | 0.484           |
| <b>chr14:103751075-103769725_R</b>                      | chr14:103751075-103769725_R | lincRNA:chr14:103751075-103769725 reverse strand                                                                                                   | -0.64                | 0.028   | 0.348           | -0.47                 | 0.006   | 0.366           |
| <b>1600014C10Rik</b>                                    | NM_028166                   | ref Mus musculus RIKEN cDNA 1600014C10 gene (1600014C10Rik), transcript variant 2, mRNA [NM_028166]                                                | -0.53                | 0.028   | 0.348           | -0.42                 | 0.049   | 0.519           |
| <b>chr7:91558475-91733625_F</b>                         | chr7:91558475-91733625_F    | lincRNA:chr7:91558475-91733625 forward strand                                                                                                      | -0.38                | 0.028   | 0.349           | -0.50                 | 0.013   | 0.412           |
| <b>Haus8</b>                                            | NM_001163042                | ref Mus musculus 4HAUS augmin-like complex, subunit 8 (Haus8), transcript variant 1, mRNA [NM_001163042]                                           | -0.36                | 0.028   | 0.349           | -0.49                 | 0.028   | 0.476           |
| <b>Chst7</b>                                            | NM_021715                   | ref Mus musculus carbohydrate (N-acetylglucosamino) sulfotransferase 7 (Chst7), mRNA [NM_021715]                                                   | -0.71                | 0.028   | 0.350           | -0.61                 | 0.008   | 0.388           |
| <b>Zfp81</b>                                            | ENSMUST00000054072          | ens zinc finger protein 81 Gene [Source:MGI (curated);Acc:MGI:1890752] [ENSMUST00000054072]                                                        | -0.25                | 0.028   | 0.350           | -0.32                 | 0.029   | 0.477           |
| <b>Olfir97</b>                                          | NM_146512                   | ref Mus musculus olfactory receptor 97 (Olfir97), mRNA [NM_146512]                                                                                 | -0.29                | 0.028   | 0.351           | -0.31                 | 0.027   | 0.471           |
| <b>4930444A02Rik</b>                                    | NM_029037                   | ref Mus musculus RIKEN cDNA 4930444A02 gene (4930444A02Rik), mRNA [NM_029037]                                                                      | -0.38                | 0.028   | 0.351           | -0.45                 | 0.045   | 0.513           |

| Online Supplemental Table IV: mG4H-STZ and Con-STZ Both |                            |                                                                                                                                                                                       |                      |         |                 |                       |         |                 |
|---------------------------------------------------------|----------------------------|---------------------------------------------------------------------------------------------------------------------------------------------------------------------------------------|----------------------|---------|-----------------|-----------------------|---------|-----------------|
| Gene Symbol                                             | RefSeq                     | Description                                                                                                                                                                           | logFC<br>Con-<br>STZ | P-value | Adj.<br>P-value | logFC<br>mG4H-<br>STZ | P-value | Adj.<br>P-value |
| <b>Sfrs17b</b>                                          | NM_001081956               | ref Mus musculus splicing factor, arginine/serine-rich 17b (Sfrs17b), mRNA [NM_001081956]                                                                                             | -0.48                | 0.028   | 0.352           | -0.46                 | 0.029   | 0.477           |
| <b>Wars2</b>                                            | NM_027462                  | ref Mus musculus tryptophanyl tRNA synthetase 2 (mitochondrial) (Wars2), nuclear gene encoding mitochondrial protein, mRNA [NM_027462]                                                | -0.26                | 0.028   | 0.353           | -0.36                 | 0.023   | 0.453           |
| <b>Mrpl24</b>                                           | NM_026591                  | ref Mus musculus mitochondrial ribosomal protein L24 (Mrpl24), nuclear gene encoding mitochondrial protein, mRNA [NM_026591]                                                          | -0.22                | 0.028   | 0.353           | -0.28                 | 0.014   | 0.416           |
| <b>Tex15</b>                                            | NM_031374                  | ref Mus musculus testis expressed gene 15 (Tex15), mRNA [NM_031374]                                                                                                                   | -0.70                | 0.028   | 0.353           | -0.46                 | 0.036   | 0.495           |
| <b>Mrpl51</b>                                           | NM_025595                  | ref Mus musculus mitochondrial ribosomal protein L51 (Mrpl51), nuclear gene encoding mitochondrial protein, mRNA [NM_025595]                                                          | -0.23                | 0.028   | 0.353           | -0.23                 | 0.018   | 0.435           |
| <b>9330102E08Rik</b>                                    | AK033854                   | gb Mus musculus adult male diencephalon cDNA, RIKEN full-length enriched library, clone:9330102E08 product:unclassifiable, full insert sequence. [AK033854]                           | -0.32                | 0.029   | 0.354           | -0.50                 | 0.050   | 0.520           |
| <b>Ephb1</b>                                            | NM_173447                  | ref Mus musculus Eph receptor B1 (Ephb1), transcript variant 1, mRNA [NM_173447]                                                                                                      | -0.62                | 0.029   | 0.354           | -0.59                 | 0.036   | 0.495           |
| <b>chr5:123439974-123448354_F</b>                       | chr5:123439974-123448354_F | lincRNA:chr5:123439974-123448354 forward strand                                                                                                                                       | -0.22                | 0.029   | 0.354           | -0.74                 | 0.001   | 0.210           |
| <b>Uqcc</b>                                             | NM_018888                  | ref Mus musculus ubiquinol-cytochrome c reductase complex chaperone, CBP3 homolog (yeast) (Uqcc), nuclear gene encoding mitochondrial protein, transcript variant 1, mRNA [NM_018888] | -0.27                | 0.029   | 0.356           | -0.29                 | 0.033   | 0.490           |
| <b>Fam43b</b>                                           | NM_001081672               | ref Mus musculus family with sequence similarity 43, member B (Fam43b), mRNA [NM_001081672]                                                                                           | -0.69                | 0.029   | 0.357           | -0.70                 | 0.008   | 0.391           |
| <b>Klrd1</b>                                            | NM_010654                  | ref Mus musculus killer cell lectin-like receptor, subfamily D, member 1 (Klrd1), mRNA [NM_010654]                                                                                    | -0.40                | 0.029   | 0.357           | -0.50                 | 0.029   | 0.477           |
| <b>5830458C19Rik</b>                                    | AK018020                   | gb Mus musculus adult male thymus cDNA, RIKEN full-length enriched library, clone:5830458C19 product:unclassifiable, full insert sequence. [AK018020]                                 | -0.37                | 0.029   | 0.357           | -0.42                 | 0.013   | 0.412           |
| <b>Ccdc61</b>                                           | NM_001033314               | ref Mus musculus coiled-coil domain containing 61 (Ccdc61), mRNA [NM_001033314]                                                                                                       | -0.23                | 0.029   | 0.358           | -0.37                 | 0.026   | 0.467           |

Online Supplemental Table IV: mG4H-STZ and Con-STZ Both

| Gene Symbol                     | RefSeq                   | Description                                                                                                         | logFC<br>Con-<br>STZ | P-value | Adj.<br>P-value | logFC<br>mG4H-<br>STZ | P-value | Adj.<br>P-value |
|---------------------------------|--------------------------|---------------------------------------------------------------------------------------------------------------------|----------------------|---------|-----------------|-----------------------|---------|-----------------|
| <b>Aarsd1</b>                   | NM_144829                | ref Mus musculus alanyl-tRNA synthetase domain containing 1 (Aarsd1), mRNA [NM_144829]                              | -0.49                | 0.029   | 0.358           | -0.28                 | 0.023   | 0.453           |
| <b>Gm572</b>                    | NM_001085505             | ref Mus musculus predicted gene 572 (Gm572), mRNA [NM_001085505]                                                    | -0.33                | 0.029   | 0.358           | -0.45                 | 0.040   | 0.504           |
| <b>Olf851</b>                   | NM_146905                | ref Mus musculus olfactory receptor 851 (Olf851), mRNA [NM_146905]                                                  | -0.54                | 0.030   | 0.360           | -0.60                 | 0.037   | 0.498           |
| <b>Rpusd3</b>                   | NM_001033204             | ref Mus musculus RNA pseudouridylate synthase domain containing 3 (Rpusd3), mRNA [NM_001033204]                     | -0.25                | 0.030   | 0.363           | -0.23                 | 0.033   | 0.487           |
| <b>Ppm1h</b>                    | NM_001110218             | ref Mus musculus protein phosphatase 1H (PP2C domain containing) (Ppm1h), transcript variant 1, mRNA [NM_001110218] | -0.27                | 0.030   | 0.363           | -0.40                 | 0.041   | 0.506           |
| <b>Uty</b>                      | NM_009484                | ref Mus musculus ubiquitously transcribed tetratricopeptide repeat gene, Y chromosome (Uty), mRNA [NM_009484]       | -0.25                | 0.030   | 0.364           | -0.32                 | 0.034   | 0.491           |
| <b>Traip</b>                    | NM_011634                | ref Mus musculus TRAF-interacting protein (Traip), mRNA [NM_011634]                                                 | -0.34                | 0.030   | 0.365           | -0.44                 | 0.012   | 0.408           |
| <b>chr2:25782483-25783075_R</b> | chr2:25782483-25783075_R | lincRNA:chr2:25782483-25783075 reverse strand                                                                       | -0.23                | 0.030   | 0.365           | -0.29                 | 0.039   | 0.501           |
| <b>Eml1</b>                     | NM_001043335             | ref Mus musculus echinoderm microtubule associated protein like 1 (Eml1), transcript variant 1, mRNA [NM_001043335] | -0.33                | 0.030   | 0.365           | -0.34                 | 0.047   | 0.515           |
| <b>ENSMUST00000064920</b>       | ENSMUST00000064920       | ens RAR-related orphan receptor alpha Gene [Source:MGI (curated);Acc:MGI:104661] [ENSMUST00000064920]               | -0.40                | 0.030   | 0.365           | -0.37                 | 0.013   | 0.412           |
| <b>ENSMUST00000089895</b>       | ENSMUST00000089895       | ens RIKEN cDNA B630019A10 gene Gene [Source:MGI Symbol;Acc:MGI:2443371] [ENSMUST00000089895]                        | -0.50                | 0.030   | 0.365           | -0.53                 | 0.021   | 0.449           |
| <b>Apc2</b>                     | NM_011789                | ref Mus musculus adenomatosis polyposis coli 2 (Apc2), mRNA [NM_011789]                                             | -0.37                | 0.031   | 0.366           | -0.42                 | 0.032   | 0.485           |
| <b>H2-T24</b>                   | NM_008207                | ref Mus musculus histocompatibility 2, T region locus 24 (H2-T24), mRNA [NM_008207]                                 | -0.40                | 0.031   | 0.367           | -0.45                 | 0.016   | 0.428           |
| <b>D630033O11Rik</b>            | XM_001001707             | ref PREDICTED: Mus musculus RIKEN cDNA D630033O11 gene (D630033O11Rik), mRNA [XM_001001707]                         | -0.67                | 0.031   | 0.367           | -0.52                 | 0.029   | 0.477           |



| Online Supplemental Table IV: mG4H-STZ and Con-STZ Both |                            |                                                                                                             |                      |         |                 |                       |         |                 |
|---------------------------------------------------------|----------------------------|-------------------------------------------------------------------------------------------------------------|----------------------|---------|-----------------|-----------------------|---------|-----------------|
| Gene Symbol                                             | RefSeq                     | Description                                                                                                 | logFC<br>Con-<br>STZ | P-value | Adj.<br>P-value | logFC<br>mG4H-<br>STZ | P-value | Adj.<br>P-value |
| Gm1409                                                  | ENSMUST00000103370         | ref PREDICTED: Mus musculus similar to Ig kappa chain V-V region L7 precursor (LOC620017), mRNA [XM_357633] | -0.32                | 0.031   | 0.368           | -0.46                 | 0.040   | 0.501           |
| Ankrd32                                                 | NM_134071                  | ref Mus musculus ankyrin repeat domain 32 (Ankrd32), mRNA [NM_134071]                                       | -0.34                | 0.031   | 0.368           | -0.34                 | 0.038   | 0.499           |
| chr10:83181374-83249918_F                               | chr10:83181374-83249918_F  | lincRNA:chr10:83181374-83249918 forward strand                                                              | -0.35                | 0.031   | 0.368           | -0.32                 | 0.043   | 0.510           |
| chr5:67854954-67869163_F                                | chr5:67854954-67869163_F   | lincRNA:chr5:67854954-67869163 forward strand                                                               | -0.44                | 0.031   | 0.368           | -0.39                 | 0.014   | 0.412           |
| Nckap5                                                  | NM_172484                  | ref Mus musculus NCK-associated protein 5 (Nckap5), transcript variant 2, mRNA [NM_172484]                  | -0.39                | 0.031   | 0.369           | -0.44                 | 0.008   | 0.391           |
| Zfp273                                                  | NM_198322                  | ref Mus musculus zinc finger protein 273 (Zfp273), mRNA [NM_198322]                                         | -0.28                | 0.031   | 0.370           | -0.38                 | 0.028   | 0.474           |
| chr4:101010948-101032148_F                              | chr4:101010948-101032148_F | lincRNA:chr4:101010948-101032148 forward strand                                                             | -0.47                | 0.031   | 0.371           | -0.47                 | 0.012   | 0.409           |
| S100b                                                   | NM_009115                  | ref Mus musculus S100 protein, beta polypeptide, neural (S100b), mRNA [NM_009115]                           | -0.41                | 0.031   | 0.371           | -0.57                 | 0.042   | 0.508           |
| Timeless                                                | NM_001164081               | ref Mus musculus timeless homolog (Drosophila) (Timeless), transcript variant 4, mRNA [NM_001164081]        | -0.41                | 0.032   | 0.372           | -0.70                 | 0.039   | 0.501           |
| Lpcat1                                                  | NM_145376                  | ref Mus musculus lysophosphatidylcholine acyltransferase 1 (Lpcat1), mRNA [NM_145376]                       | -0.37                | 0.032   | 0.372           | -0.40                 | 0.019   | 0.439           |
| ENSMUST00000108336                                      | ENSMUST00000108336         | ens zinc finger protein 60 Gene [Source:MGI (curated);Acc:MGI:99207] [ENSMUST00000108336]                   | -0.42                | 0.032   | 0.372           | -0.55                 | 0.037   | 0.496           |
| Katnal1                                                 | NM_153572                  | ref Mus musculus katanin p60 subunit A-like 1 (Katnal1), mRNA [NM_153572]                                   | -0.26                | 0.032   | 0.372           | -0.29                 | 0.045   | 0.513           |
| BY080835                                                | NM_001081244               | ref Mus musculus cDNA sequence BY080835 (BY080835), mRNA [NM_001081244]                                     | -0.30                | 0.032   | 0.372           | -0.51                 | 0.043   | 0.509           |
| Gm5148                                                  | NM_198657                  | ref Mus musculus predicted gene 5148 (Gm5148), mRNA [NM_198657]                                             | -0.85                | 0.032   | 0.372           | -0.68                 | 0.047   | 0.515           |
| Dtwd2                                                   | NM_026854                  | ref Mus musculus DTW domain containing 2 (Dtwd2), transcript variant 1, mRNA [NM_026854]                    | -0.43                | 0.032   | 0.373           | -0.49                 | 0.014   | 0.414           |

| Online Supplemental Table IV: mG4H-STZ and Con-STZ Both |                            |                                                                                                                                                                    |                      |         |                 |                       |         |                 |
|---------------------------------------------------------|----------------------------|--------------------------------------------------------------------------------------------------------------------------------------------------------------------|----------------------|---------|-----------------|-----------------------|---------|-----------------|
| Gene Symbol                                             | RefSeq                     | Description                                                                                                                                                        | logFC<br>Con-<br>STZ | P-value | Adj.<br>P-value | logFC<br>mG4H-<br>STZ | P-value | Adj.<br>P-value |
| Ptcd2                                                   | NM_026873                  | ref Mus musculus pentatricopeptide repeat domain 2 (Ptcd2), mRNA [NM_026873]                                                                                       | -0.30                | 0.032   | 0.373           | -0.25                 | 0.043   | 0.509           |
| chr1:175705225-175717250_R                              | chr1:175705225-175717250_R | lincRNA:chr1:175705225-175717250 reverse strand                                                                                                                    | -0.50                | 0.032   | 0.373           | -0.69                 | 0.040   | 0.504           |
| Pafah2                                                  | NM_133880                  | ref Mus musculus platelet-activating factor acetylhydrolase 2 (Pafah2), mRNA [NM_133880]                                                                           | -0.35                | 0.032   | 0.374           | -0.40                 | 0.027   | 0.472           |
| Fhit                                                    | NM_010210                  | ref Mus musculus fragile histidine triad gene (Fhit), mRNA [NM_010210]                                                                                             | -0.32                | 0.032   | 0.374           | -0.22                 | 0.047   | 0.515           |
| Gm5813                                                  | XM_619437                  | ref PREDICTED: Mus musculus predicted gene, EG545190, transcript variant 1 (EG545190), mRNA [XM_619437]                                                            | -0.45                | 0.032   | 0.374           | -0.75                 | 0.017   | 0.429           |
| chr13:98479793-98481177_R                               | chr13:98479793-98481177_R  | lincRNA:chr13:98479793-98481177 reverse strand                                                                                                                     | -0.37                | 0.032   | 0.374           | -0.78                 | 0.001   | 0.248           |
| Mme                                                     | NM_008604                  | ref Mus musculus membrane metallo endopeptidase (Mme), mRNA [NM_008604]                                                                                            | -0.23                | 0.032   | 0.374           | -0.31                 | 0.043   | 0.509           |
| ENSMUST00000109791                                      | ENSMUST00000109791         | gb Mus musculus 13 days embryo liver cDNA, RIKEN full-length enriched library, clone:2500004C02 product:unclassifiable, full insert sequence. [AK010870]           | -0.42                | 0.032   | 0.374           | -0.51                 | 0.037   | 0.496           |
| 9430041J12Rik                                           | AK051461                   | gb Mus musculus 12 days embryo spinal ganglion cDNA, RIKEN full-length enriched library, clone:D130050D15 product:unclassifiable, full insert sequence. [AK051461] | -0.46                | 0.032   | 0.374           | -0.40                 | 0.040   | 0.504           |
| Pltp                                                    | NM_011125                  | ref Mus musculus phospholipid transfer protein (Pltp), mRNA [NM_011125]                                                                                            | -0.35                | 0.032   | 0.374           | -0.54                 | 0.003   | 0.281           |
| ENSMUST00000091745                                      | ENSMUST00000091745         | ens Histone H2A type 1-H [Source:UniProtKB/Swiss-Prot;Acc:Q8CGP6] [ENSMUST00000091745]                                                                             | -0.77                | 0.032   | 0.375           | -1.26                 | 0.047   | 0.515           |
| Gpr162                                                  | NM_013533                  | ref Mus musculus G protein-coupled receptor 162 (Gpr162), mRNA [NM_013533]                                                                                         | -0.46                | 0.032   | 0.375           | -0.33                 | 0.029   | 0.477           |
| Rasgrp3                                                 | NM_207246                  | ref Mus musculus RAS, guanyl releasing protein 3 (Rasgrp3), transcript variant 2, mRNA [NM_207246]                                                                 | -0.41                | 0.032   | 0.375           | -0.61                 | 0.043   | 0.509           |
| Rpp21                                                   | NM_026308                  | ref Mus musculus ribonuclease P 21 subunit (human) (Rpp21), mRNA [NM_026308]                                                                                       | -0.19                | 0.032   | 0.375           | -0.26                 | 0.035   | 0.495           |
| chr13:15947521-15999246_F                               | chr13:15947521-15999246_F  | lincRNA:chr13:15947521-15999246 forward strand                                                                                                                     | -0.33                | 0.033   | 0.376           | -0.39                 | 0.027   | 0.471           |

Online Supplemental Table IV: mG4H-STZ and Con-STZ Both

| Gene Symbol                       | RefSeq                     | Description                                                                                                                 | logFC<br>Con-<br>STZ | P-value | Adj.<br>P-value | logFC<br>mG4H-<br>STZ | P-value | Adj.<br>P-value |
|-----------------------------------|----------------------------|-----------------------------------------------------------------------------------------------------------------------------|----------------------|---------|-----------------|-----------------------|---------|-----------------|
| <b>chr17:79959134-79972206_F</b>  | chr17:79959134-79972206_F  | lincRNA:chr17:79959134-79972206 forward strand                                                                              | -0.37                | 0.033   | 0.376           | -0.41                 | 0.030   | 0.479           |
| <b>Rgs21</b>                      | XM_889451                  | ref PREDICTED: Mus musculus regulator of G-protein signalling 21 (Rgs21), mRNA [XM_889451]                                  | -0.50                | 0.033   | 0.376           | -0.53                 | 0.030   | 0.479           |
| <b>D0H4S114</b>                   | NM_053078                  | ref Mus musculus DNA segment, human D4S114 (D0H4S114), transcript variant 1, mRNA [NM_053078]                               | -0.93                | 0.033   | 0.376           | -1.20                 | 0.018   | 0.435           |
| <b>Pom121l2</b>                   | NM_001162929               | ref Mus musculus POM121 membrane glycoprotein-like 2 (rat) (Pom121l2), transcript variant 2, mRNA [NM_001162929]            | -0.61                | 0.033   | 0.377           | -0.46                 | 0.022   | 0.450           |
| <b>Use1</b>                       | NM_001145780               | ref Mus musculus unconventional SNARE in the ER 1 homolog (S. cerevisiae) (Use1), transcript variant 3, mRNA [NM_001145780] | -0.32                | 0.033   | 0.377           | -0.28                 | 0.020   | 0.443           |
| <b>Akap3</b>                      | NM_009650                  | ref Mus musculus A kinase (PRKA) anchor protein 3 (Akap3), mRNA [NM_009650]                                                 | -0.51                | 0.033   | 0.377           | -0.38                 | 0.047   | 0.515           |
| <b>Ddah1</b>                      | NM_026993                  | ref Mus musculus dimethylarginine dimethylaminohydrolase 1 (Ddah1), mRNA [NM_026993]                                        | -0.40                | 0.033   | 0.379           | -0.41                 | 0.017   | 0.433           |
| <b>AU040320</b>                   | NM_133886                  | ref Mus musculus expressed sequence AU040320 (AU040320), transcript variant 3, mRNA [NM_133886]                             | -0.19                | 0.033   | 0.380           | -0.20                 | 0.049   | 0.518           |
| <b>chr8:40238025-40264250_R</b>   | chr8:40238025-40264250_R   | lincRNA:chr8:40238025-40264250 reverse strand                                                                               | -0.30                | 0.033   | 0.380           | -0.47                 | 0.030   | 0.477           |
| <b>ENSMUST00000110657</b>         | ENSMUST00000110657         | ens tubulin, gamma complex associated protein 4 Gene [Source:MGI (curated);Acc:MGI:1196293] [ENSMUST00000110657]            | -0.73                | 0.034   | 0.380           | -0.27                 | 0.049   | 0.519           |
| <b>chrX:137519350-137534325_R</b> | chrX:137519350-137534325_R | lincRNA:chrX:137519350-137534325 reverse strand                                                                             | -0.50                | 0.034   | 0.382           | -0.47                 | 0.049   | 0.519           |
| <b>Gm6878</b>                     | NM_001037931               | ref Mus musculus predicted gene 6878 (Gm6878), mRNA [NM_001037931]                                                          | -0.49                | 0.034   | 0.383           | -0.95                 | 0.003   | 0.299           |
| <b>1810014F10Rik</b>              | NM_026928                  | ref Mus musculus RIKEN cDNA 1810014F10 gene (1810014F10Rik), mRNA [NM_026928]                                               | -0.22                | 0.034   | 0.383           | -0.25                 | 0.033   | 0.490           |
| <b>Scrn2</b>                      | NM_146027                  | ref Mus musculus secemin 2 (Scrn2), mRNA [NM_146027]                                                                        | -0.25                | 0.034   | 0.383           | -0.42                 | 0.033   | 0.488           |
| <b>Shc3</b>                       | NM_009167                  | ref Mus musculus src homology 2 domain-containing transforming protein C3 (Shc3), mRNA [NM_009167]                          | -0.33                | 0.034   | 0.383           | -0.38                 | 0.019   | 0.439           |

| Online Supplemental Table IV: mG4H-STZ and Con-STZ Both |                             |                                                                                                            |                      |         |                 |                       |         |                 |
|---------------------------------------------------------|-----------------------------|------------------------------------------------------------------------------------------------------------|----------------------|---------|-----------------|-----------------------|---------|-----------------|
| Gene Symbol                                             | RefSeq                      | Description                                                                                                | logFC<br>Con-<br>STZ | P-value | Adj.<br>P-value | logFC<br>mG4H-<br>STZ | P-value | Adj.<br>P-value |
| chr4:126009815-126015875_F                              | chr4:126009815-126015875_F  | lincRNA:chr4:126009815-126015875 forward strand                                                            | -0.23                | 0.034   | 0.383           | -0.33                 | 0.017   | 0.432           |
| Magt1                                                   | NM_025952                   | ref Mus musculus magnesium transporter 1 (Magt1), transcript variant 2, mRNA [NM_025952]                   | -0.33                | 0.034   | 0.385           | -0.40                 | 0.006   | 0.358           |
| Neurod4                                                 | NM_007501                   | ref Mus musculus neurogenic differentiation 4 (Neurod4), mRNA [NM_007501]                                  | -0.44                | 0.035   | 0.387           | -0.69                 | 0.020   | 0.443           |
| 1700023I07Rik                                           | NR_033731                   | ref Mus musculus RIKEN cDNA 1700023I07 gene (1700023I07Rik), non-coding RNA [NR_033731]                    | -0.42                | 0.035   | 0.387           | -0.48                 | 0.034   | 0.493           |
| Efna2                                                   | NM_007909                   | ref Mus musculus ephrin A2 (Efna2), mRNA [NM_007909]                                                       | -0.42                | 0.035   | 0.387           | -0.52                 | 0.019   | 0.437           |
| ENSMUST00000093859                                      | ENSMUST00000093859          | ens glutamate receptor ionotropic, NMDA3A Gene [Source:MGI (curated);Acc:MGI:1933206] [ENSMUST00000093859] | -0.50                | 0.035   | 0.387           | -0.37                 | 0.018   | 0.437           |
| chr19:23068397-23190256_R                               | chr19:23068397-23190256_R   | lincRNA:chr19:23068397-23190256 reverse strand                                                             | -0.34                | 0.035   | 0.388           | -0.71                 | 0.001   | 0.246           |
| ENSMUST00000103299                                      | ENSMUST00000103299          | ens T-cell receptor beta, variable 13 Gene [Source:MGI Symbol;Acc:MGI:98587] [ENSMUST00000103299]          | -0.63                | 0.035   | 0.388           | -0.67                 | 0.039   | 0.500           |
| Hspe1                                                   | NM_008303                   | ref Mus musculus heat shock protein 1 (chaperonin 10) (Hspe1), mRNA [NM_008303]                            | -0.22                | 0.035   | 0.389           | -0.34                 | 0.025   | 0.464           |
| Nepn                                                    | NM_025684                   | ref Mus musculus nephrocan (Nepn), mRNA [NM_025684]                                                        | -0.55                | 0.035   | 0.390           | -0.69                 | 0.038   | 0.499           |
| Tbc1d7                                                  | NM_025935                   | ref Mus musculus TBC1 domain family, member 7 (Tbc1d7), mRNA [NM_025935]                                   | -0.20                | 0.035   | 0.390           | -0.29                 | 0.033   | 0.490           |
| chr1:58443698-58449898_F                                | chr1:58443698-58449898_F    | lincRNA:chr1:58443698-58449898 forward strand                                                              | -0.28                | 0.035   | 0.391           | -0.46                 | 0.028   | 0.474           |
| chr13:28952570-28953234_R                               | chr13:28952570-28953234_R   | lincRNA:chr13:28952570-28953234 reverse strand                                                             | -0.39                | 0.035   | 0.391           | -0.51                 | 0.008   | 0.390           |
| chr12:117623500-117643575_F                             | chr12:117623500-117643575_F | lincRNA:chr12:117623500-117643575 forward strand                                                           | -0.38                | 0.036   | 0.391           | -0.48                 | 0.004   | 0.308           |
| Kif6                                                    | NM_177052                   | ref Mus musculus kinesin family member 6 (Kif6), mRNA [NM_177052]                                          | -0.50                | 0.036   | 0.392           | -0.53                 | 0.005   | 0.340           |

Online Supplemental Table IV: mG4H-STZ and Con-STZ Both

| Gene Symbol                     | RefSeq                   | Description                                                                                                                 | logFC<br>Con-<br>STZ | P-value | Adj.<br>P-value | logFC<br>mG4H-<br>STZ | P-value | Adj.<br>P-value |
|---------------------------------|--------------------------|-----------------------------------------------------------------------------------------------------------------------------|----------------------|---------|-----------------|-----------------------|---------|-----------------|
| <b>Olfr483</b>                  | NM_146735                | ref Mus musculus olfactory receptor 483 (Olfr483), mRNA [NM_146735]                                                         | -0.41                | 0.036   | 0.392           | -0.31                 | 0.044   | 0.512           |
| <b>Abhd10</b>                   | NM_172511                | ref Mus musculus abhydrolase domain containing 10 (Abhd10), mRNA [NM_172511]                                                | -0.30                | 0.036   | 0.393           | -0.26                 | 0.044   | 0.511           |
| <b>Ifi203</b>                   | NM_001045481             | ref Mus musculus interferon activated gene 203 (Ifi203), transcript variant 1, mRNA [NM_001045481]                          | -0.51                | 0.036   | 0.393           | -0.76                 | 0.038   | 0.499           |
| <b>Phb</b>                      | NM_008831                | ref Mus musculus prohibitin (Phb), mRNA [NM_008831]                                                                         | -0.26                | 0.036   | 0.395           | -0.25                 | 0.039   | 0.501           |
| <b>Pramel3</b>                  | NM_031390                | ref Mus musculus preferentially expressed antigen in melanoma-like 3 (Pramel3), mRNA [NM_031390]                            | -0.69                | 0.036   | 0.395           | -0.80                 | 0.005   | 0.349           |
| <b>Tmem143</b>                  | NM_144801                | ref Mus musculus transmembrane protein 143 (Tmem143), mRNA [NM_144801]                                                      | -0.25                | 0.036   | 0.395           | -0.25                 | 0.034   | 0.493           |
| <b>Asxl3</b>                    | NM_001167777             | ref Mus musculus additional sex combs like 3 (Drosophila) (Asxl3), mRNA [NM_001167777]                                      | -0.51                | 0.036   | 0.395           | -0.55                 | 0.046   | 0.513           |
| <b>Mapk9</b>                    | NM_001163672             | ref Mus musculus mitogen-activated protein kinase 9 (Mapk9), transcript variant alpha1, mRNA [NM_001163672]                 | -0.20                | 0.036   | 0.395           | -0.32                 | 0.011   | 0.407           |
| <b>Il17rb</b>                   | NM_019583                | ref Mus musculus interleukin 17 receptor B (Il17rb), mRNA [NM_019583]                                                       | -0.35                | 0.036   | 0.395           | -0.51                 | 0.008   | 0.391           |
| <b>Gm4121</b>                   | XM_001472111             | ref PREDICTED: Mus musculus hypothetical protein LOC100044458 (LOC100044458), mRNA [XM_001472111]                           | -0.35                | 0.037   | 0.396           | -0.43                 | 0.006   | 0.369           |
| <b>AU022096</b>                 | BG068135                 | gb H3062B06-3 NIA Mouse 15K cDNA Clone Set Mus musculus cDNA clone H3062B06 3', mRNA sequence [BG068135]                    | -0.52                | 0.037   | 0.397           | -0.61                 | 0.024   | 0.458           |
| <b>Sema6a</b>                   | NM_018744                | ref Mus musculus sema domain, transmembrane domain (TM), and cytoplasmic domain, (semaphorin) 6A (Sema6a), mRNA [NM_018744] | -0.38                | 0.037   | 0.398           | -0.35                 | 0.037   | 0.497           |
| <b>Samd5</b>                    | NM_177271                | ref Mus musculus sterile alpha motif domain containing 5 (Samd5), mRNA [NM_177271]                                          | -0.51                | 0.037   | 0.398           | -0.66                 | 0.010   | 0.400           |
| <b>chr9:36509939-36515389_F</b> | chr9:36509939-36515389_F | lincRNA:chr9:36509939-36515389 forward strand                                                                               | -0.50                | 0.037   | 0.398           | -0.34                 | 0.036   | 0.495           |
| <b>Prnp</b>                     | NM_028243                | ref Mus musculus prolylcarboxypeptidase (angiotensinase C) (Prnp), mRNA [NM_028243]                                         | -0.50                | 0.037   | 0.400           | -0.39                 | 0.047   | 0.515           |

Online Supplemental Table IV: mG4H-STZ and Con-STZ Both

| Gene Symbol                      | RefSeq                    | Description                                                                                                                                             | logFC<br>Con-<br>STZ | P-value | Adj.<br>P-value | logFC<br>mG4H-<br>STZ | P-value | Adj.<br>P-value |
|----------------------------------|---------------------------|---------------------------------------------------------------------------------------------------------------------------------------------------------|----------------------|---------|-----------------|-----------------------|---------|-----------------|
| <b>chr13:54399275-54445825_F</b> | chr13:54399275-54445825_F | lincRNA:chr13:54399275-54445825 forward strand                                                                                                          | -0.25                | 0.037   | 0.401           | -0.42                 | 0.006   | 0.366           |
| <b>Foxred1</b>                   | NM_172291                 | ref Mus musculus FAD-dependent oxidoreductase domain containing 1 (Foxred1), mRNA [NM_172291]                                                           | -0.23                | 0.038   | 0.402           | -0.25                 | 0.010   | 0.401           |
| <b>Yipf6</b>                     | NM_207633                 | ref Mus musculus Yip1 domain family, member 6 (Yipf6), mRNA [NM_207633]                                                                                 | -0.32                | 0.038   | 0.402           | -0.43                 | 0.046   | 0.513           |
| <b>Ipcef1</b>                    | NM_001170800              | ref Mus musculus interaction protein for cytohesin exchange factors 1 (Ipcef1), transcript variant 1, mRNA [NM_001170800]                               | -0.38                | 0.038   | 0.402           | -0.62                 | 0.003   | 0.283           |
| <b>Mmachc</b>                    | NM_025962                 | ref Mus musculus methylmalonic aciduria cblC type, with homocystinuria (Mmachc), mRNA [NM_025962]                                                       | -0.33                | 0.038   | 0.402           | -0.47                 | 0.017   | 0.433           |
| <b>2610204G22Rik</b>             | NR_027971                 | ref Mus musculus RIKEN cDNA 2610204G22 gene (2610204G22Rik), transcript variant 1, non-coding RNA [NR_027971]                                           | -0.53                | 0.038   | 0.404           | -0.57                 | 0.025   | 0.464           |
| <b>ENSMUST00000043710</b>        | ENSMUST00000043710        | ens ecotropic viral integration site 5 like Gene [Source:MGI Symbol;Acc:MGI:2442167] [ENSMUST00000043710]                                               | -0.28                | 0.038   | 0.404           | -0.28                 | 0.050   | 0.520           |
| <b>Ifi203</b>                    | NM_001045481              | ref Mus musculus interferon activated gene 203 (Ifi203), transcript variant 1, mRNA [NM_001045481]                                                      | -0.47                | 0.038   | 0.404           | -0.69                 | 0.025   | 0.464           |
| <b>Coro2a</b>                    | NM_178893                 | ref Mus musculus coronin, actin binding protein 2A (Coro2a), transcript variant 1, mRNA [NM_178893]                                                     | -0.32                | 0.038   | 0.404           | -0.52                 | 0.005   | 0.339           |
| <b>Rcbtb2</b>                    | NM_134083                 | ref Mus musculus regulator of chromosome condensation (RCC1) and BTB (POZ) domain containing protein 2 (Rcbtb2), transcript variant 2, mRNA [NM_134083] | -0.24                | 0.038   | 0.404           | -0.34                 | 0.023   | 0.453           |
| <b>Akr1e1</b>                    | NM_018859                 | ref Mus musculus aldo-keto reductase family 1, member E1 (Akr1e1), mRNA [NM_018859]                                                                     | -0.24                | 0.038   | 0.405           | -0.35                 | 0.030   | 0.479           |
| <b>Xkrx</b>                      | NM_183319                 | ref Mus musculus X Kell blood group precursor related X linked (Xkrx), mRNA [NM_183319]                                                                 | -0.49                | 0.038   | 0.405           | -0.47                 | 0.018   | 0.436           |
| <b>Afg3l1</b>                    | NM_054070                 | ref Mus musculus AFG3(ATPase family gene 3)-like 1 (yeast) (Afg3l1), transcript variant 1, mRNA [NM_054070]                                             | -0.22                | 0.038   | 0.405           | -0.22                 | 0.043   | 0.511           |
| <b>Prl7a1</b>                    | NM_001164058              | ref Mus musculus prolactin family 7, subfamily a, member 1 (Prl7a1), transcript variant 1, mRNA [NM_001164058]                                          | -0.43                | 0.038   | 0.405           | -0.53                 | 0.012   | 0.412           |

| Online Supplemental Table IV: mG4H-STZ and Con-STZ Both |                           |                                                                                                                                               |                      |         |                 |                       |         |                 |
|---------------------------------------------------------|---------------------------|-----------------------------------------------------------------------------------------------------------------------------------------------|----------------------|---------|-----------------|-----------------------|---------|-----------------|
| Gene Symbol                                             | RefSeq                    | Description                                                                                                                                   | logFC<br>Con-<br>STZ | P-value | Adj.<br>P-value | logFC<br>mG4H-<br>STZ | P-value | Adj.<br>P-value |
| 4930545E07Rik                                           | BY715633                  | gb BY715633 RIKEN full-length enriched, adult male testis Mus musculus cDNA clone 4930545E07 5'. [BY715633]                                   | -0.60                | 0.038   | 0.405           | -0.66                 | 0.043   | 0.511           |
| Gca                                                     | NM_145523                 | ref Mus musculus grancalcin (Gca), mRNA [NM_145523]                                                                                           | -0.29                | 0.038   | 0.406           | -0.25                 | 0.031   | 0.482           |
| Dera                                                    | NM_172733                 | ref Mus musculus 2-deoxyribose-5-phosphate aldolase homolog (C. elegans) (Dera), mRNA [NM_172733]                                             | -0.41                | 0.038   | 0.407           | -0.55                 | 0.001   | 0.203           |
| Ndufb5                                                  | NM_025316                 | ref Mus musculus NADH dehydrogenase (ubiquinone) 1 beta subcomplex, 5 (Ndufb5), nuclear gene encoding mitochondrial protein, mRNA [NM_025316] | -0.22                | 0.039   | 0.409           | -0.24                 | 0.042   | 0.508           |
| Ndufv2                                                  | NM_028388                 | ref Mus musculus NADH dehydrogenase (ubiquinone) flavoprotein 2 (Ndufv2), nuclear gene encoding mitochondrial protein, mRNA [NM_028388]       | -0.20                | 0.039   | 0.409           | -0.29                 | 0.020   | 0.441           |
| chr10:97196521-97207471_R                               | chr10:97196521-97207471_R | lincRNA:chr10:97196521-97207471 reverse strand                                                                                                | -0.33                | 0.039   | 0.409           | -0.35                 | 0.008   | 0.391           |
| chr12:33808493-33829143_F                               | chr12:33808493-33829143_F | lincRNA:chr12:33808493-33829143 forward strand                                                                                                | -0.58                | 0.039   | 0.409           | -0.71                 | 0.041   | 0.506           |
| Qrs1                                                    | NM_001081054              | ref Mus musculus glutamyl-tRNA synthase (glutamine-hydrolyzing)-like 1 (Qrs1), mRNA [NM_001081054]                                            | -0.43                | 0.039   | 0.409           | -0.41                 | 0.043   | 0.511           |
| chrX:47893703-47996700_R                                | chrX:47893703-47996700_R  | lincRNA:chrX:47893703-47996700 reverse strand                                                                                                 | -0.68                | 0.039   | 0.412           | -0.86                 | 0.005   | 0.346           |
| chr8:85609155-85615170_F                                | chr8:85609155-85615170_F  | lincRNA:chr8:85609155-85615170 forward strand                                                                                                 | -0.49                | 0.039   | 0.412           | -0.30                 | 0.041   | 0.505           |
| Hspa12a                                                 | NM_175199                 | ref Mus musculus heat shock protein 12A (Hspa12a), mRNA [NM_175199]                                                                           | -0.66                | 0.039   | 0.412           | -0.62                 | 0.027   | 0.472           |
| Cxxc4                                                   | NM_001004367              | ref Mus musculus CXXC finger 4 (Cxxc4), mRNA [NM_001004367]                                                                                   | -0.46                | 0.039   | 0.412           | -0.47                 | 0.031   | 0.482           |
| Stxbp6                                                  | NM_144552                 | ref Mus musculus syntaxin binding protein 6 (amisyn) (Stxbp6), mRNA [NM_144552]                                                               | -0.33                | 0.039   | 0.412           | -0.39                 | 0.005   | 0.353           |
| chr14:77006215-77063293_F                               | chr14:77006215-77063293_F | lincRNA:chr14:77006215-77063293 forward strand                                                                                                | -0.38                | 0.040   | 0.413           | -0.57                 | 0.048   | 0.518           |
| Bend4                                                   | NM_001164806              | ref Mus musculus BEN domain containing 4 (Bend4), mRNA [NM_001164806]                                                                         | -0.44                | 0.040   | 0.414           | -0.32                 | 0.026   | 0.471           |



| Online Supplemental Table IV: mG4H-STZ and Con-STZ Both |                           |                                                                                                                                       |                  |         |                 |                   |         |                 |
|---------------------------------------------------------|---------------------------|---------------------------------------------------------------------------------------------------------------------------------------|------------------|---------|-----------------|-------------------|---------|-----------------|
| Gene Symbol                                             | RefSeq                    | Description                                                                                                                           | logFC<br>Con-STZ | P-value | Adj.<br>P-value | logFC<br>mG4H-STZ | P-value | Adj.<br>P-value |
| 4930452B06Rik                                           | NM_028934                 | ref Mus musculus RIKEN cDNA 4930452B06 gene (4930452B06Rik), mRNA [NM_028934]                                                         | -0.70            | 0.040   | 0.414           | -0.62             | 0.012   | 0.407           |
| chr16:40307931-40318856_R                               | chr16:40307931-40318856_R | lincRNA:chr16:40307931-40318856 reverse strand                                                                                        | -0.49            | 0.040   | 0.414           | -0.67             | 0.036   | 0.495           |
| Gm7921                                                  | XM_981456                 | ref PREDICTED: Mus musculus predicted gene, EG666080 (EG666080), mRNA [XM_981456]                                                     | -0.51            | 0.040   | 0.414           | -0.54             | 0.043   | 0.511           |
| Sh3bgr                                                  | NM_015825                 | ref Mus musculus SH3-binding domain glutamic acid-rich protein (Sh3bgr), mRNA [NM_015825]                                             | -0.32            | 0.040   | 0.415           | -0.31             | 0.014   | 0.418           |
| Itgb6                                                   | NM_021359                 | ref Mus musculus integrin beta 6 (Itgb6), transcript variant 2, mRNA [NM_021359]                                                      | -0.65            | 0.040   | 0.415           | -0.47             | 0.009   | 0.397           |
| chr13:74568375-74601000_R                               | chr13:74568375-74601000_R | lincRNA:chr13:74568375-74601000 reverse strand                                                                                        | -0.42            | 0.040   | 0.415           | -0.47             | 0.010   | 0.403           |
| Coq5                                                    | NM_026504                 | ref Mus musculus coenzyme Q5 homolog, methyltransferase (yeast) (Coq5), nuclear gene encoding mitochondrial protein, mRNA [NM_026504] | -0.28            | 0.040   | 0.415           | -0.30             | 0.027   | 0.472           |
| chr10:66559716-66647841_R                               | chr10:66559716-66647841_R | lincRNA:chr10:66559716-66647841 reverse strand                                                                                        | -0.52            | 0.040   | 0.416           | -0.55             | 0.005   | 0.349           |
| Trim5                                                   | ENSMUST00000098179        | ens tripartite motif-containing 5 Gene [Source:MGI Symbol;Acc:MGI:3646853] [ENSMUST00000098179]                                       | -0.34            | 0.041   | 0.418           | -0.65             | 0.017   | 0.433           |
| chr8:82854412-82919089_R                                | chr8:82854412-82919089_R  | lincRNA:chr8:82854412-82919089 reverse strand                                                                                         | -0.32            | 0.041   | 0.418           | -0.47             | 0.039   | 0.501           |
| Gm3181                                                  | XM_001476516              | ref PREDICTED: Mus musculus hypothetical protein LOC100041175 (LOC100041175), mRNA [XM_001476516]                                     | -0.31            | 0.041   | 0.419           | -0.28             | 0.034   | 0.493           |
| Eml1                                                    | NM_001043335              | ref Mus musculus echinoderm microtubule associated protein like 1 (Eml1), transcript variant 1, mRNA [NM_001043335]                   | -0.35            | 0.041   | 0.420           | -0.39             | 0.030   | 0.477           |
| Zdhhc21                                                 | NM_026647                 | ref Mus musculus zinc finger, DHHC domain containing 21 (Zdhhc21), mRNA [NM_026647]                                                   | -0.22            | 0.041   | 0.422           | -0.40             | 0.041   | 0.505           |
| Dguok                                                   | NM_013764                 | ref Mus musculus deoxyguanosine kinase (Dguok), nuclear gene encoding mitochondrial protein, transcript variant 1, mRNA [NM_013764]   | -0.21            | 0.042   | 0.422           | -0.36             | 0.031   | 0.482           |

| Online Supplemental Table IV: mG4H-STZ and Con-STZ Both |                           |                                                                                                                |                      |         |                 |                       |         |                 |
|---------------------------------------------------------|---------------------------|----------------------------------------------------------------------------------------------------------------|----------------------|---------|-----------------|-----------------------|---------|-----------------|
| Gene Symbol                                             | RefSeq                    | Description                                                                                                    | logFC<br>Con-<br>STZ | P-value | Adj.<br>P-value | logFC<br>mG4H-<br>STZ | P-value | Adj.<br>P-value |
| Lekr1                                                   | NM_001037923              | ref Mus musculus leucine, glutamate and lysine rich 1 (Lekr1), transcript variant 2, mRNA [NM_001037923]       | -0.37                | 0.042   | 0.424           | -0.65                 | 0.015   | 0.423           |
| Trpt1                                                   | NM_153597                 | ref Mus musculus tRNA phosphotransferase 1 (Trpt1), transcript variant 1, mRNA [NM_153597]                     | -0.27                | 0.042   | 0.424           | -0.30                 | 0.025   | 0.467           |
| ENSMUST00000112942                                      | ENSMUST00000112942        | ens MTERF domain containing 2 Gene [Source:MGI (curated);Acc:MGI:1918355] [ENSMUST00000112942]                 | -0.55                | 0.042   | 0.424           | -0.53                 | 0.018   | 0.435           |
| chr15:77164450-77201325_F                               | chr15:77164450-77201325_F | lincRNA:chr15:77164450-77201325 forward strand                                                                 | -0.34                | 0.042   | 0.426           | -0.41                 | 0.007   | 0.377           |
| Tal1                                                    | NM_011527                 | ref Mus musculus T-cell acute lymphocytic leukemia 1 (Tal1), mRNA [NM_011527]                                  | -0.22                | 0.043   | 0.427           | -0.33                 | 0.010   | 0.405           |
| chr3:26985397-26986076_F                                | chr3:26985397-26986076_F  | lincRNA:chr3:26985397-26986076 forward strand                                                                  | -0.45                | 0.043   | 0.427           | -0.57                 | 0.027   | 0.472           |
| Gm16387                                                 | NM_001024727              | ref Mus musculus predicted gene 16387 (Gm16387), mRNA [NM_001024727]                                           | -0.36                | 0.043   | 0.427           | -0.56                 | 0.030   | 0.477           |
| Gm5595                                                  | NM_001008427              | ref Mus musculus predicted gene 5595 (Gm5595), mRNA [NM_001008427]                                             | -0.35                | 0.043   | 0.427           | -0.62                 | 0.020   | 0.445           |
| Vmn2r27                                                 | NM_001104642              | ref Mus musculus vomeronasal 2, receptor27 (Vmn2r27), mRNA [NM_001104642]                                      | -0.70                | 0.043   | 0.428           | -0.41                 | 0.027   | 0.472           |
| Prrt4                                                   | NM_001101443              | ref Mus musculus proline-rich transmembrane protein 4 (Prrt4), mRNA [NM_001101443]                             | -0.36                | 0.043   | 0.428           | -0.32                 | 0.049   | 0.519           |
| Ict1                                                    | NM_026729                 | ref Mus musculus immature colon carcinoma transcript 1 (Ict1), mRNA [NM_026729]                                | -0.22                | 0.043   | 0.428           | -0.29                 | 0.029   | 0.477           |
| Sigirr                                                  | NM_023059                 | ref Mus musculus single immunoglobulin and toll-interleukin 1 receptor (TIR) domain (Sigirr), mRNA [NM_023059] | -0.22                | 0.043   | 0.428           | -0.37                 | 0.009   | 0.398           |
| Ccdc125                                                 | NM_183115                 | ref Mus musculus coiled-coil domain containing 125 (Ccdc125), transcript variant 1, mRNA [NM_183115]           | -0.26                | 0.043   | 0.428           | -0.43                 | 0.026   | 0.469           |
| Gm9529                                                  | XR_034837                 | ref PREDICTED: Mus musculus hypothetical LOC671322 (LOC671322), misc RNA [XR_034837]                           | -0.38                | 0.043   | 0.429           | -0.46                 | 0.012   | 0.408           |
| Acot8                                                   | NM_133240                 | ref Mus musculus acyl-CoA thioesterase 8 (Acot8), mRNA [NM_133240]                                             | -0.28                | 0.043   | 0.429           | -0.32                 | 0.022   | 0.452           |

| Online Supplemental Table IV: mG4H-STZ and Con-STZ Both |                          |                                                                                                                                                                                  |                      |         |                 |                       |         |                 |
|---------------------------------------------------------|--------------------------|----------------------------------------------------------------------------------------------------------------------------------------------------------------------------------|----------------------|---------|-----------------|-----------------------|---------|-----------------|
| Gene Symbol                                             | RefSeq                   | Description                                                                                                                                                                      | logFC<br>Con-<br>STZ | P-value | Adj.<br>P-value | logFC<br>mG4H-<br>STZ | P-value | Adj.<br>P-value |
| <b>ENSMUST00000114337</b>                               | ENSMUST00000114337       | ens Ngg1 interacting factor 3-like 1 (S. pombe) Gene [Source:MGI (curated);Acc:MGI:1929485] [ENSMUST00000114337]                                                                 | -0.30                | 0.043   | 0.430           | -0.48                 | 0.013   | 0.412           |
| <b>Snx11</b>                                            | NM_028965                | ref Mus musculus sorting nexin 11 (Snx11), mRNA [NM_028965]                                                                                                                      | -0.17                | 0.044   | 0.430           | -0.26                 | 0.035   | 0.495           |
| <b>Mansc1</b>                                           | NM_026345                | ref Mus musculus MANSC domain containing 1 (Mansc1), mRNA [NM_026345]                                                                                                            | -0.68                | 0.044   | 0.432           | -0.35                 | 0.028   | 0.474           |
| <b>1810014F10Rik</b>                                    | NM_026928                | ref Mus musculus RIKEN cDNA 1810014F10 gene (1810014F10Rik), mRNA [NM_026928]                                                                                                    | -0.18                | 0.044   | 0.432           | -0.26                 | 0.036   | 0.495           |
| <b>G3bp2</b>                                            | NM_001080795             | ref Mus musculus GTPase activating protein (SH3 domain) binding protein 2 (G3bp2), transcript variant 3, mRNA [NM_001080795]                                                     | -0.18                | 0.044   | 0.433           | -0.23                 | 0.026   | 0.471           |
| <b>Olfr145</b>                                          | NM_146313                | ref Mus musculus olfactory receptor 145 (Olfr145), mRNA [NM_146313]                                                                                                              | -0.73                | 0.044   | 0.435           | -1.02                 | 0.047   | 0.515           |
| <b>ENSMUST00000111010</b>                               | ENSMUST00000111010       | ens RIKEN cDNA 4930430A15 gene Gene [Source:MGI Symbol;Acc:MGI:1914825] [ENSMUST00000111010]                                                                                     | -0.74                | 0.044   | 0.435           | -0.90                 | 0.011   | 0.407           |
| <b>chr2:48826955-48827592_F</b>                         | chr2:48826955-48827592_F | lincRNA:chr2:48826955-48827592 forward strand                                                                                                                                    | -0.41                | 0.044   | 0.436           | -0.42                 | 0.019   | 0.437           |
| <b>A_55_P2021495</b>                                    | A_55_P2021495            | Unknown                                                                                                                                                                          | -0.33                | 0.045   | 0.436           | -0.34                 | 0.019   | 0.441           |
| <b>H2-DMa</b>                                           | NM_010386                | ref Mus musculus histocompatibility 2, class II, locus DMa (H2-DMa), mRNA [NM_010386]                                                                                            | -0.35                | 0.045   | 0.436           | -0.46                 | 0.029   | 0.477           |
| <b>5430405G05Rik</b>                                    | NM_001160363             | ref Mus musculus RIKEN cDNA 5430405G05 gene (5430405G05Rik), mRNA [NM_001160363]                                                                                                 | -0.45                | 0.045   | 0.436           | -0.53                 | 0.043   | 0.509           |
| <b>Tomm40</b>                                           | NM_001109748             | ref Mus musculus translocase of outer mitochondrial membrane 40 homolog (yeast) (Tomm40), nuclear gene encoding mitochondrial protein, transcript variant 1, mRNA [NM_001109748] | -0.31                | 0.045   | 0.437           | -0.34                 | 0.023   | 0.456           |
| <b>Atp5k</b>                                            | NM_007507                | ref Mus musculus ATP synthase, H <sup>+</sup> transporting, mitochondrial F1F0 complex, subunit e (Atp5k), nuclear gene encoding mitochondrial protein, mRNA [NM_007507]         | -0.25                | 0.045   | 0.438           | -0.28                 | 0.013   | 0.412           |

| Online Supplemental Table IV: mG4H-STZ and Con-STZ Both |                            |                                                                                                                                                                |                      |         |                 |                       |         |                 |
|---------------------------------------------------------|----------------------------|----------------------------------------------------------------------------------------------------------------------------------------------------------------|----------------------|---------|-----------------|-----------------------|---------|-----------------|
| Gene Symbol                                             | RefSeq                     | Description                                                                                                                                                    | logFC<br>Con-<br>STZ | P-value | Adj.<br>P-value | logFC<br>mG4H-<br>STZ | P-value | Adj.<br>P-value |
| Col4a3                                                  | NM_007734                  | ref Mus musculus collagen, type IV, alpha 3 (Col4a3), mRNA [NM_007734]                                                                                         | -0.31                | 0.045   | 0.439           | -0.38                 | 0.018   | 0.435           |
| Sc4mol                                                  | NM_025436                  | ref Mus musculus sterol-C4-methyl oxidase-like (Sc4mol), mRNA [NM_025436]                                                                                      | -0.24                | 0.045   | 0.440           | -0.32                 | 0.033   | 0.489           |
| Cd6                                                     | NM_009852                  | ref Mus musculus CD6 antigen (Cd6), transcript variant 2, mRNA [NM_009852]                                                                                     | -0.37                | 0.045   | 0.440           | -0.45                 | 0.031   | 0.482           |
| chr7:86680928-86700632_F                                | chr7:86680928-86700632_F   | lincRNA:chr7:86680928-86700632 forward strand                                                                                                                  | -0.54                | 0.045   | 0.441           | -1.38                 | 0.001   | 0.173           |
| Tstd1                                                   | NM_001164525               | ref Mus musculus thiosulfate sulfurtransferase (rhodanese)-like domain containing 1 (Tstd1), mRNA [NM_001164525]                                               | -0.39                | 0.046   | 0.442           | -0.58                 | 0.015   | 0.420           |
| 0610009B22Rik                                           | NM_025319                  | ref Mus musculus RIKEN cDNA 0610009B22 gene (0610009B22Rik), mRNA [NM_025319]                                                                                  | -0.22                | 0.046   | 0.442           | -0.27                 | 0.045   | 0.513           |
| chr2:77146893-77155643_R                                | chr2:77146893-77155643_R   | lincRNA:chr2:77146893-77155643 reverse strand                                                                                                                  | -0.55                | 0.046   | 0.443           | -0.61                 | 0.039   | 0.500           |
| Gcnt3                                                   | NM_028087                  | ref Mus musculus glucosaminyl (N-acetyl) transferase 3, mucin type (Gcnt3), mRNA [NM_028087]                                                                   | -0.39                | 0.046   | 0.443           | -0.56                 | 0.010   | 0.405           |
| BC025920                                                | NR_030677                  | ref Mus musculus cDNA sequence BC025920 (BC025920), non-coding RNA [NR_030677]                                                                                 | -0.28                | 0.046   | 0.443           | -0.29                 | 0.045   | 0.513           |
| C030013G03Rik                                           | AK021075                   | gb Mus musculus adult male corpus striatum cDNA, RIKEN full-length enriched library, clone:C030013G03 product:unclassifiable, full insert sequence. [AK021075] | -0.55                | 0.046   | 0.443           | -0.96                 | 0.006   | 0.369           |
| Gm7975                                                  | XM_991123                  | ref PREDICTED: Mus musculus predicted gene, EG666200, transcript variant 2 (EG666200), mRNA [XM_991123]                                                        | -0.36                | 0.046   | 0.443           | -0.49                 | 0.030   | 0.479           |
| Svopl                                                   | NM_177200                  | ref Mus musculus SV2 related protein homolog (rat)-like (Svopl), mRNA [NM_177200]                                                                              | -0.54                | 0.046   | 0.444           | -0.55                 | 0.010   | 0.401           |
| Ubash3b                                                 | NM_176860                  | ref Mus musculus ubiquitin associated and SH3 domain containing, B (Ubash3b), mRNA [NM_176860]                                                                 | -0.55                | 0.046   | 0.444           | -0.77                 | 0.037   | 0.496           |
| chr1:175660642-175671878_R                              | chr1:175660642-175671878_R | lincRNA:chr1:175660642-175671878 reverse strand                                                                                                                | -0.37                | 0.046   | 0.444           | -0.59                 | 0.011   | 0.406           |

| Online Supplemental Table IV: mG4H-STZ and Con-STZ Both |                            |                                                                                                                                                       |                      |         |                 |                       |         |                 |
|---------------------------------------------------------|----------------------------|-------------------------------------------------------------------------------------------------------------------------------------------------------|----------------------|---------|-----------------|-----------------------|---------|-----------------|
| Gene Symbol                                             | RefSeq                     | Description                                                                                                                                           | logFC<br>Con-<br>STZ | P-value | Adj.<br>P-value | logFC<br>mG4H-<br>STZ | P-value | Adj.<br>P-value |
| <b>Mrpl15</b>                                           | NM_001177658               | ref Mus musculus mitochondrial ribosomal protein L15 (Mrpl15), nuclear gene encoding mitochondrial protein, transcript variant 1, mRNA [NM_001177658] | -0.21                | 0.046   | 0.445           | -0.23                 | 0.050   | 0.520           |
| <b>chr2:104657075-104658840_F</b>                       | chr2:104657075-104658840_F | lincRNA:chr2:104657075-104658840 forward strand                                                                                                       | -0.20                | 0.047   | 0.446           | -0.27                 | 0.044   | 0.511           |
| <b>9530091C08Rik</b>                                    | NR_033299                  | ref Mus musculus RIKEN cDNA 9530091C08 gene (9530091C08Rik), non-coding RNA [NR_033299]                                                               | -0.58                | 0.047   | 0.446           | -0.69                 | 0.004   | 0.312           |
| <b>March11</b>                                          | NM_177597                  | ref Mus musculus membrane-associated ring finger (C3HC4) 11 (March11), mRNA [NM_177597]                                                               | -0.28                | 0.047   | 0.447           | -0.49                 | 0.018   | 0.435           |
| <b>Mrps17</b>                                           | NM_025450                  | ref Mus musculus mitochondrial ribosomal protein S17 (Mrps17), nuclear gene encoding mitochondrial protein, mRNA [NM_025450]                          | -0.19                | 0.047   | 0.447           | -0.27                 | 0.039   | 0.499           |
| <b>chrX:147610870-147614259_F</b>                       | chrX:147610870-147614259_F | lincRNA:chrX:147610870-147614259 forward strand                                                                                                       | -0.56                | 0.047   | 0.447           | -0.77                 | 0.019   | 0.439           |
| <b>Rnf7</b>                                             | NM_011279                  | ref Mus musculus ring finger protein 7 (Rnf7), mRNA [NM_011279]                                                                                       | -0.23                | 0.047   | 0.447           | -0.29                 | 0.025   | 0.463           |
| <b>Gls2</b>                                             | NM_001033264               | ref Mus musculus glutaminase 2 (liver, mitochondrial) (Gls2), nuclear gene encoding mitochondrial protein, mRNA [NM_001033264]                        | -0.44                | 0.047   | 0.447           | -0.39                 | 0.046   | 0.513           |
| <b>Cxx1b</b>                                            | NM_001018063               | ref Mus musculus CAAX box 1 homolog B (human) (Cxx1b), mRNA [NM_001018063]                                                                            | -0.30                | 0.047   | 0.448           | -0.36                 | 0.022   | 0.453           |
| <b>chr14:61240427-61325677_F</b>                        | chr14:61240427-61325677_F  | lincRNA:chr14:61240427-61325677 forward strand                                                                                                        | -0.28                | 0.047   | 0.449           | -0.52                 | 0.008   | 0.388           |
| <b>Mrpl43</b>                                           | NM_053164                  | ref Mus musculus mitochondrial ribosomal protein L43 (Mrpl43), nuclear gene encoding mitochondrial protein, mRNA [NM_053164]                          | -0.74                | 0.047   | 0.449           | -0.27                 | 0.016   | 0.426           |
| <b>6820408C15Rik</b>                                    | NM_177656                  | ref Mus musculus RIKEN cDNA 6820408C15 gene (6820408C15Rik), mRNA [NM_177656]                                                                         | -0.51                | 0.048   | 0.449           | -0.52                 | 0.040   | 0.503           |
| <b>Mrpl15</b>                                           | NM_001177658               | ref Mus musculus mitochondrial ribosomal protein L15 (Mrpl15), nuclear gene encoding mitochondrial protein, transcript variant 1, mRNA [NM_001177658] | -0.36                | 0.048   | 0.449           | -0.64                 | 0.011   | 0.406           |
| <b>chr11:33414450-33450750_R</b>                        | chr11:33414450-33450750_R  | lincRNA:chr11:33414450-33450750 reverse strand                                                                                                        | -0.25                | 0.048   | 0.450           | -0.28                 | 0.041   | 0.505           |

Online Supplemental Table IV: mG4H-STZ and Con-STZ Both

| Gene Symbol                       | RefSeq                     | Description                                                                                                                                                        | logFC<br>Con-<br>STZ | P-value | Adj.<br>P-value | logFC<br>mG4H-<br>STZ | P-value | Adj.<br>P-value |
|-----------------------------------|----------------------------|--------------------------------------------------------------------------------------------------------------------------------------------------------------------|----------------------|---------|-----------------|-----------------------|---------|-----------------|
| <b>Aurkc</b>                      | NM_001080966               | ref Mus musculus aurora kinase C (Aurkc), transcript variant 2, mRNA [NM_001080966]                                                                                | -0.33                | 0.048   | 0.450           | -0.40                 | 0.031   | 0.480           |
| <b>Gtpbp10</b>                    | NM_153116                  | ref Mus musculus GTP-binding protein 10 (putative) (Gtpbp10), mRNA [NM_153116]                                                                                     | -0.27                | 0.048   | 0.450           | -0.30                 | 0.049   | 0.518           |
| <b>Daam1</b>                      | NM_026102                  | ref Mus musculus dishevelled associated activator of morphogenesis 1 (Daam1), transcript variant 1, mRNA [NM_026102]                                               | -0.45                | 0.048   | 0.450           | -0.44                 | 0.037   | 0.496           |
| <b>ENSMUST00000103331</b>         | ENSMUST00000103331         | gb Mus musculus rearranged immunoglobulin light chain variable region mRNA, partial cds. [U37911]                                                                  | -0.47                | 0.048   | 0.451           | -0.92                 | 0.027   | 0.472           |
| <b>Lsmd1</b>                      | NM_030083                  | ref Mus musculus LSM domain containing 1 (Lsmd1), mRNA [NM_030083]                                                                                                 | -0.20                | 0.048   | 0.451           | -0.28                 | 0.029   | 0.477           |
| <b>Sidt1</b>                      | NM_198034                  | ref Mus musculus SID1 transmembrane family, member 1 (Sidt1), transcript variant 2, mRNA [NM_198034]                                                               | -0.32                | 0.048   | 0.451           | -0.42                 | 0.021   | 0.450           |
| <b>Gm10549</b>                    | ENSMUST00000097634         | ens Putative uncharacterized protein Fragment [Source:UniProtKB/TrEMBL;Acc:Q3URY4] [ENSMUST00000097634]                                                            | -0.51                | 0.048   | 0.451           | -0.69                 | 0.010   | 0.403           |
| <b>chr6:134839791-134842085_R</b> | chr6:134839791-134842085_R | lincRNA:chr6:134839791-134842085 reverse strand                                                                                                                    | -1.50                | 0.048   | 0.452           | -0.73                 | 0.043   | 0.510           |
| <b>4930558N11Rik</b>              | XM_001472327               | ref PREDICTED: Mus musculus RIKEN cDNA 4930558N11 gene (4930558N11Rik), mRNA [XM_001472327]                                                                        | -0.33                | 0.048   | 0.452           | -0.36                 | 0.028   | 0.474           |
| <b>D2hgdh</b>                     | NM_178882                  | ref Mus musculus D-2-hydroxyglutarate dehydrogenase (D2hgdh), nuclear gene encoding mitochondrial protein, mRNA [NM_178882]                                        | -0.25                | 0.049   | 0.455           | -0.37                 | 0.012   | 0.412           |
| <b>Oxsm</b>                       | NM_027695                  | ref Mus musculus 3-oxoacyl-ACP synthase, mitochondrial (Oxsm), nuclear gene encoding mitochondrial protein, mRNA [NM_027695]                                       | -0.19                | 0.049   | 0.455           | -0.25                 | 0.028   | 0.474           |
| <b>B130024M06Rik</b>              | AK045073                   | gb Mus musculus 9.5 days embryo parthenogenote cDNA, RIKEN full-length enriched library, clone:B130024M06 product:unclassifiable, full insert sequence. [AK045073] | -1.10                | 0.049   | 0.456           | -0.48                 | 0.036   | 0.495           |
| <b>Naip1</b>                      | NM_008670                  | ref Mus musculus NLR family, apoptosis inhibitory protein 1 (Naip1), mRNA [NM_008670]                                                                              | -0.37                | 0.049   | 0.456           | -0.57                 | 0.026   | 0.468           |

| Online Supplemental Table IV: mG4H-STZ and Con-STZ Both |              |                                                                                                            |                      |         |                 |                       |         |                 |
|---------------------------------------------------------|--------------|------------------------------------------------------------------------------------------------------------|----------------------|---------|-----------------|-----------------------|---------|-----------------|
| Gene Symbol                                             | RefSeq       | Description                                                                                                | logFC<br>Con-<br>STZ | P-value | Adj.<br>P-value | logFC<br>mG4H-<br>STZ | P-value | Adj.<br>P-value |
| <b>Ska2l-ps</b>                                         | XM_001479792 | ref PREDICTED: Mus musculus predicted gene, EG625534, transcript variant 1 (EG625534), mRNA [XM_001479792] | -0.31                | 0.050   | 0.457           | -0.34                 | 0.034   | 0.491           |
| <b>Itpa</b>                                             | NM_025922    | ref Mus musculus inosine triphosphatase (nucleoside triphosphate pyrophosphatase) (Itpa), mRNA [NM_025922] | -0.22                | 0.050   | 0.457           | -0.35                 | 0.040   | 0.504           |
| <b>Entpd6</b>                                           | NM_172117    | ref Mus musculus ectonucleoside triphosphate diphosphohydrolase 6 (Entpd6), mRNA [NM_172117]               | -0.24                | 0.050   | 0.457           | -0.39                 | 0.005   | 0.353           |
| <b>Itsn1</b>                                            | NM_001110275 | ref Mus musculus intersectin 1 (SH3 domain protein 1A) (Itsn1), transcript variant 2, mRNA [NM_001110275]  | -0.32                | 0.050   | 0.457           | -0.40                 | 0.039   | 0.500           |



Online Supplemental Table IV: All Three Overlap

| Gene Symbol                      | RefSeq                    | Description                                                                                                                                               | logFC<br>mG4H-<br>STZ | P-value | Adj.<br>P-value | logFC<br>mG4H-<br>Veh | P-value | Adj.<br>P-value | logFC<br>Con-<br>STZ | P-value | Adj.<br>P-value |
|----------------------------------|---------------------------|-----------------------------------------------------------------------------------------------------------------------------------------------------------|-----------------------|---------|-----------------|-----------------------|---------|-----------------|----------------------|---------|-----------------|
| <b>5830403M04Rik</b>             | AK042097                  | gb Mus musculus 3 days neonate thymus cDNA, RIKEN full-length enriched library, clone:A630057N03 product:unclassifiable, full insert sequence. [AK042097] | 2.21                  | 0.000   | 0.135           | 1.74                  | 0.004   | 0.527           | 1.67                 | 0.008   | 0.184           |
| <b>Acot1</b>                     | NM_012006                 | ref Mus musculus acyl-CoA thioesterase 1 (Acot1), mRNA [NM_012006]                                                                                        | 2.12                  | 0.000   | 0.007           | 0.80                  | 0.000   | 0.009           | 2.79                 | 0.000   | 0.000           |
| <b>Rad51l1</b>                   | NM_009014                 | ref Mus musculus RAD51-like 1 (S. cerevisiae) (Rad51l1), mRNA [NM_009014]                                                                                 | 1.79                  | 0.007   | 0.377           | 0.60                  | 0.024   | 0.957           | 1.91                 | 0.000   | 0.024           |
| <b>Gm2015</b>                    | XM_001472138              | ref PREDICTED: Mus musculus similar to pol protein (LOC100039039), mRNA [XM_001472138]                                                                    | 1.68                  | 0.009   | 0.394           | 0.55                  | 0.036   | 1.000           | 1.49                 | 0.009   | 0.202           |
| <b>LOC632173</b>                 | XR_031181                 | ref PREDICTED: Mus musculus similar to D5Ertd577e protein (LOC632173), misc RNA [XR_031181]                                                               | 1.68                  | 0.031   | 0.482           | 1.77                  | 0.027   | 0.983           | 1.61                 | 0.038   | 0.405           |
| <b>Ucp2</b>                      | NM_011671                 | ref Mus musculus uncoupling protein 2 (mitochondrial, proton carrier) (Ucp2), nuclear gene encoding mitochondrial protein, mRNA [NM_011671]               | 1.61                  | 0.001   | 0.177           | 0.47                  | 0.004   | 0.516           | 1.69                 | 0.000   | 0.008           |
| <b>Acot5</b>                     | NM_145444                 | ref Mus musculus acyl-CoA thioesterase 5 (Acot5), mRNA [NM_145444]                                                                                        | 1.59                  | 0.000   | 0.083           | 0.41                  | 0.037   | 1.000           | 2.22                 | 0.000   | 0.002           |
| <b>Pdk4</b>                      | NM_013743                 | ref Mus musculus pyruvate dehydrogenase kinase, isoenzyme 4 (Pdk4), mRNA [NM_013743]                                                                      | 1.56                  | 0.000   | 0.037           | 0.67                  | 0.001   | 0.320           | 2.02                 | 0.000   | 0.000           |
| <b>Gm2371</b>                    | XM_001472740              | ref PREDICTED: Mus musculus similar to pol protein (LOC100044629), mRNA [XM_001472740]                                                                    | 1.47                  | 0.010   | 0.403           | 0.54                  | 0.042   | 1.000           | 1.53                 | 0.006   | 0.161           |
| <b>Ucp3</b>                      | NM_009464                 | ref Mus musculus uncoupling protein 3 (mitochondrial, proton carrier) (Ucp3), nuclear gene encoding mitochondrial protein, mRNA [NM_009464]               | 1.44                  | 0.000   | 0.157           | 0.31                  | 0.031   | 0.998           | 1.59                 | 0.000   | 0.002           |
| <b>Cdkn1a</b>                    | NM_007669                 | ref Mus musculus cyclin-dependent kinase inhibitor 1A (P21) (Cdkn1a), transcript variant 1, mRNA [NM_007669]                                              | 1.42                  | 0.032   | 0.483           | 0.45                  | 0.042   | 1.000           | 1.54                 | 0.004   | 0.129           |
| <b>Arrdc4</b>                    | NM_025549                 | ref Mus musculus arrestin domain containing 4 (Arrdc4), transcript variant 2, mRNA [NM_025549]                                                            | 1.39                  | 0.001   | 0.167           | 0.94                  | 0.000   | 0.004           | 0.49                 | 0.002   | 0.086           |
| <b>Spsb2</b>                     | NM_013539                 | ref Mus musculus splA/ryanodine receptor domain and SOCS box containing 2 (Spsb2), mRNA [NM_013539]                                                       | 1.33                  | 0.000   | 0.007           | 0.59                  | 0.000   | 0.132           | 1.39                 | 0.000   | 0.001           |
| <b>Maff</b>                      | NM_010755                 | ref Mus musculus v-maf musculoaponeurotic fibrosarcoma oncogene family, protein F (avian) (Maff), mRNA [NM_010755]                                        | 1.33                  | 0.008   | 0.391           | 0.31                  | 0.015   | 0.830           | 1.20                 | 0.001   | 0.058           |
| <b>Cgref1</b>                    | NM_026770                 | ref Mus musculus cell growth regulator with EF hand domain 1 (Cgref1), transcript variant 1, mRNA [NM_026770]                                             | 1.32                  | 0.000   | 0.129           | 0.42                  | 0.001   | 0.338           | 1.79                 | 0.000   | 0.000           |
| <b>Gm16439</b>                   | XM_001478188              | ref PREDICTED: Mus musculus similar to E1B 19K/Bcl-2-binding protein homolog (LOC100042570), mRNA [XM_001478188]                                          | 1.31                  | 0.006   | 0.369           | 0.33                  | 0.014   | 0.825           | 1.25                 | 0.000   | 0.027           |
| <b>chr11:99970341-99973420_R</b> | chr11:99970341-99973420_R | lincRNA:chr11:99970341-99973420 reverse strand                                                                                                            | 1.28                  | 0.006   | 0.365           | 1.19                  | 0.005   | 0.588           | 0.95                 | 0.015   | 0.260           |

| Online Supplemental Table IV: All Three Overlap |                            |                                                                                                                                                                |                       |         |                 |                       |         |                 |                      |         |                 |
|-------------------------------------------------|----------------------------|----------------------------------------------------------------------------------------------------------------------------------------------------------------|-----------------------|---------|-----------------|-----------------------|---------|-----------------|----------------------|---------|-----------------|
| Gene Symbol                                     | RefSeq                     | Description                                                                                                                                                    | logFC<br>mG4H-<br>STZ | P-value | Adj.<br>P-value | logFC<br>mG4H-<br>Veh | P-value | Adj.<br>P-value | logFC<br>Con-<br>STZ | P-value | Adj.<br>P-value |
| <b>Tmem100</b>                                  | NM_026433                  | ref Mus musculus transmembrane protein 100 (Tmem100), mRNA [NM_026433]                                                                                         | 1.26                  | 0.000   | 0.121           | 0.42                  | 0.036   | 1.000           | 1.31                 | 0.000   | 0.034           |
| <b>chr3:127170996-127201096_F</b>               | chr3:127170996-127201096_F | lincRNA:chr3:127170996-127201096 forward strand                                                                                                                | 1.19                  | 0.017   | 0.429           | 1.27                  | 0.007   | 0.682           | 1.02                 | 0.036   | 0.392           |
| <b>Chrna2</b>                                   | NM_144803                  | ref Mus musculus cholinergic receptor, nicotinic, alpha polypeptide 2 (neuronal) (Chma2), mRNA [NM_144803]                                                     | 1.18                  | 0.000   | 0.157           | 0.26                  | 0.037   | 1.000           | 1.46                 | 0.000   | 0.001           |
| <b>Shisa3</b>                                   | NM_001033415               | ref Mus musculus shisa homolog 3 (Xenopus laevis) (Shisa3), mRNA [NM_001033415]                                                                                | 1.13                  | 0.000   | 0.141           | 0.60                  | 0.012   | 0.793           | 0.95                 | 0.002   | 0.097           |
| <b>Ptk2b</b>                                    | NM_172498                  | ref Mus musculus PTK2 protein tyrosine kinase 2 beta (Ptk2b), transcript variant 3, mRNA [NM_172498]                                                           | 1.10                  | 0.000   | 0.048           | 0.30                  | 0.011   | 0.770           | 0.88                 | 0.001   | 0.065           |
| <b>Acot2</b>                                    | NM_134188                  | ref Mus musculus acyl-CoA thioesterase 2 (Acot2), nuclear gene encoding mitochondrial protein, mRNA [NM_134188]                                                | 1.09                  | 0.000   | 0.066           | 0.45                  | 0.005   | 0.578           | 1.59                 | 0.000   | 0.000           |
| <b>Fam46a</b>                                   | NM_001160378               | ref Mus musculus family with sequence similarity 46, member A (Fam46a), transcript variant 1, mRNA [NM_001160378]                                              | 1.09                  | 0.026   | 0.470           | 0.28                  | 0.020   | 0.895           | 1.10                 | 0.001   | 0.059           |
| <b>Nrip3</b>                                    | NM_020610                  | ref Mus musculus nuclear receptor interacting protein 3 (Nrip3), mRNA [NM_020610]                                                                              | 1.07                  | 0.027   | 0.472           | 0.38                  | 0.012   | 0.786           | 1.05                 | 0.003   | 0.106           |
| <b>D830030K20Rik</b>                            | NM_177135                  | ref Mus musculus RIKEN cDNA D830030K20 gene (D830030K20Rik), mRNA [NM_177135]                                                                                  | 1.05                  | 0.001   | 0.210           | 0.36                  | 0.008   | 0.704           | 1.29                 | 0.000   | 0.002           |
| <b>chr14:55672705-55675212_F</b>                | chr14:55672705-55675212_F  | lincRNA:chr14:55672705-55675212 forward strand                                                                                                                 | 1.03                  | 0.001   | 0.184           | 0.98                  | 0.002   | 0.432           | 0.60                 | 0.041   | 0.418           |
| <b>Bnip3</b>                                    | NM_009760                  | ref Mus musculus BCL2/adenovirus E1B interacting protein 3 (Bnip3), nuclear gene encoding mitochondrial protein, mRNA [NM_009760]                              | 1.03                  | 0.010   | 0.404           | 0.26                  | 0.043   | 1.000           | 0.90                 | 0.005   | 0.148           |
| <b>Gm10638</b>                                  | AK133595                   | gb Mus musculus adult male pituitary gland cDNA, RIKEN full-length enriched library, clone:5330411O07 product:unclassifiable, full insert sequence. [AK133595] | 1.01                  | 0.015   | 0.419           | 0.18                  | 0.047   | 1.000           | 1.06                 | 0.001   | 0.065           |
| <b>Thbs1</b>                                    | NM_011580                  | ref Mus musculus thrombospondin 1 (Thbs1), mRNA [NM_011580]                                                                                                    | 0.96                  | 0.001   | 0.173           | 0.55                  | 0.014   | 0.820           | 1.01                 | 0.000   | 0.021           |
| <b>Cpeb2</b>                                    | NM_175937                  | ref Mus musculus cytoplasmic polyadenylation element binding protein 2 (Cpeb2), transcript variant 1, mRNA [NM_175937]                                         | 0.95                  | 0.034   | 0.493           | 0.22                  | 0.020   | 0.897           | 0.49                 | 0.010   | 0.209           |
| <b>Tspan4</b>                                   | NM_053082                  | ref Mus musculus tetraspanin 4 (Tspan4), mRNA [NM_053082]                                                                                                      | 0.95                  | 0.000   | 0.160           | 0.44                  | 0.000   | 0.095           | 0.81                 | 0.000   | 0.016           |
| <b>2010111I01Rik</b>                            | NM_028079                  | ref Mus musculus RIKEN cDNA 2010111I01 gene (2010111I01Rik), mRNA [NM_028079]                                                                                  | 0.93                  | 0.010   | 0.402           | 0.25                  | 0.017   | 0.863           | 0.90                 | 0.000   | 0.019           |
| <b>Ppil6</b>                                    | NM_028430                  | ref Mus musculus peptidylprolyl isomerase (cyclophilin)-like 6 (Ppil6), mRNA [NM_028430]                                                                       | 0.92                  | 0.020   | 0.447           | 0.36                  | 0.035   | 1.000           | 0.81                 | 0.006   | 0.162           |

Online Supplemental Table IV: All Three Overlap

| Gene Symbol                      | RefSeq                    | Description                                                                                                                | logFC<br>mG4H-<br>STZ | P-value | Adj.<br>P-value | logFC<br>mG4H-<br>Veh | P-value | Adj.<br>P-value | logFC<br>Con-<br>STZ | P-value | Adj.<br>P-value |
|----------------------------------|---------------------------|----------------------------------------------------------------------------------------------------------------------------|-----------------------|---------|-----------------|-----------------------|---------|-----------------|----------------------|---------|-----------------|
| <b>lfrd1</b>                     | NM_013562                 | ref Mus musculus interferon-related developmental regulator 1 (lfrd1), mRNA [NM_013562]                                    | 0.91                  | 0.008   | 0.391           | 0.34                  | 0.000   | 0.132           | 0.91                 | 0.000   | 0.006           |
| <b>chr15:59966962-59972812_R</b> | chr15:59966962-59972812_R | lincRNA:chr15:59966962-59972812 reverse strand                                                                             | 0.90                  | 0.017   | 0.435           | 0.91                  | 0.043   | 1.000           | 0.94                 | 0.013   | 0.247           |
| <b>Rufy3</b>                     | NM_027530                 | ref Mus musculus RUN and FYVE domain containing 3 (Rufy3), mRNA [NM_027530]                                                | 0.90                  | 0.008   | 0.391           | 0.38                  | 0.034   | 1.000           | 0.51                 | 0.001   | 0.067           |
| <b>2200002D01Rik</b>             | NM_028179                 | ref Mus musculus RIKEN cDNA 2200002D01 gene (2200002D01Rik), mRNA [NM_028179]                                              | 0.88                  | 0.010   | 0.400           | 0.28                  | 0.013   | 0.793           | 1.07                 | 0.000   | 0.011           |
| <b>Gm14506</b>                   | XR_032176                 | ref PREDICTED: Mus musculus similar to E1B 19K/Bcl-2-binding protein homolog (LOC675416), misc RNA [XR_032176]             | 0.87                  | 0.006   | 0.369           | 0.21                  | 0.039   | 1.000           | 0.79                 | 0.002   | 0.089           |
| <b>Dydc1</b>                     | NM_027094                 | ref Mus musculus DPY30 domain containing 1 (Dydc1), mRNA [NM_027094]                                                       | 0.87                  | 0.006   | 0.356           | 0.66                  | 0.023   | 0.936           | 0.57                 | 0.041   | 0.422           |
| <b>chr3:48896525-48994125_R</b>  | chr3:48896525-48994125_R  | lincRNA:chr3:48896525-48994125 reverse strand                                                                              | 0.86                  | 0.007   | 0.382           | 0.72                  | 0.031   | 0.998           | 0.73                 | 0.031   | 0.366           |
| <b>Abhd1</b>                     | NM_021304                 | ref Mus musculus abhydrolase domain containing 1 (Abhd1), mRNA [NM_021304]                                                 | 0.86                  | 0.001   | 0.216           | 0.36                  | 0.014   | 0.825           | 1.12                 | 0.000   | 0.009           |
| <b>Olf1r1283</b>                 | NM_207236                 | ref Mus musculus olfactory receptor 1283 (Olf1r1283), mRNA [NM_207236]                                                     | 0.86                  | 0.002   | 0.279           | 0.61                  | 0.029   | 0.986           | 0.66                 | 0.009   | 0.206           |
| <b>Rgs16</b>                     | NM_011267                 | ref Mus musculus regulator of G-protein signaling 16 (Rgs16), mRNA [NM_011267]                                             | 0.85                  | 0.000   | 0.134           | 0.38                  | 0.004   | 0.538           | 0.45                 | 0.004   | 0.137           |
| <b>Klf10</b>                     | NM_013692                 | ref Mus musculus Kruppel-like factor 10 (Klf10), mRNA [NM_013692]                                                          | 0.85                  | 0.000   | 0.160           | 0.70                  | 0.000   | 0.170           | 0.83                 | 0.000   | 0.007           |
| <b>chr6:93570531-93599006_F</b>  | chr6:93570531-93599006_F  | lincRNA:chr6:93570531-93599006 forward strand                                                                              | 0.84                  | 0.014   | 0.412           | 0.64                  | 0.040   | 1.000           | 0.71                 | 0.028   | 0.351           |
| <b>Impa2</b>                     | NM_053261                 | ref Mus musculus inositol (myo)-1(or 4)-monophosphatase 2 (Impa2), mRNA [NM_053261]                                        | 0.81                  | 0.000   | 0.077           | 0.74                  | 0.000   | 0.020           | 0.90                 | 0.000   | 0.004           |
| <b>1700017N19Rik</b>             | NM_001081246              | ref Mus musculus RIKEN cDNA 1700017N19 gene (1700017N19Rik), mRNA [NM_001081246]                                           | 0.81                  | 0.001   | 0.241           | 0.72                  | 0.002   | 0.409           | 0.45                 | 0.041   | 0.421           |
| <b>Gm2715</b>                    | XM_001474506              | ref PREDICTED: Mus musculus hypothetical protein LOC100040327 (LOC100040327), mRNA [XM_001474506]                          | 0.80                  | 0.011   | 0.406           | 0.85                  | 0.009   | 0.731           | 0.70                 | 0.021   | 0.304           |
| <b>Pfkfb3</b>                    | NM_001177753              | ref Mus musculus 6-phosphofructo-2-kinase/fructose-2,6-biphosphatase 3 (Pfkfb3), transcript variant 2, mRNA [NM_001177753] | 0.79                  | 0.003   | 0.290           | 0.48                  | 0.000   | 0.190           | 0.23                 | 0.044   | 0.432           |
| <b>1300010F03Rik</b>             | NM_173758                 | ref Mus musculus RIKEN cDNA 1300010F03 gene (1300010F03Rik), transcript variant 2, mRNA [NM_173758]                        | 0.79                  | 0.000   | 0.160           | 0.31                  | 0.001   | 0.320           | 0.81                 | 0.000   | 0.003           |
| <b>Gm5432</b>                    | XM_488626                 | ref PREDICTED: Mus musculus predicted gene, EG432636 (EG432636), mRNA [XM_488626]                                          | 0.79                  | 0.026   | 0.469           | 0.97                  | 0.006   | 0.628           | 0.66                 | 0.041   | 0.418           |

| Online Supplemental Table IV: All Three Overlap |                           |                                                                                                                                                          |                       |         |                 |                       |         |                 |                      |         |                 |
|-------------------------------------------------|---------------------------|----------------------------------------------------------------------------------------------------------------------------------------------------------|-----------------------|---------|-----------------|-----------------------|---------|-----------------|----------------------|---------|-----------------|
| Gene Symbol                                     | RefSeq                    | Description                                                                                                                                              | logFC<br>mG4H-<br>STZ | P-value | Adj.<br>P-value | logFC<br>mG4H-<br>Veh | P-value | Adj.<br>P-value | logFC<br>Con-<br>STZ | P-value | Adj.<br>P-value |
| chr13:83867711-83878140_F                       | chr13:83867711-83878140_F | lincRNA:chr13:83867711-83878140 forward strand                                                                                                           | 0.78                  | 0.025   | 0.463           | 0.67                  | 0.046   | 1.000           | 0.88                 | 0.014   | 0.253           |
| LOC676890                                       | XM_993808                 | ref PREDICTED: Mus musculus hypothetical LOC676890 (LOC676890), mRNA [XM_993808]                                                                         | 0.78                  | 0.002   | 0.281           | 0.56                  | 0.020   | 0.886           | 0.57                 | 0.033   | 0.377           |
| ENSMUST00000028048                              | ENSMUST00000028048        | ens RAB GTPase activating protein 1-like Gene [Source:MGI Symbol;Acc:MGI:1352507] [ENSMUST00000028048]                                                   | 0.77                  | 0.000   | 0.157           | 0.19                  | 0.024   | 0.956           | 0.57                 | 0.003   | 0.110           |
| E430022K19Rik                                   | AK040137                  | gb Mus musculus 0 day neonate thymus cDNA, RIKEN full-length enriched library, clone:A430069D01 product:unclassifiable, full insert sequence. [AK040137] | 0.77                  | 0.000   | 0.048           | 0.34                  | 0.015   | 0.840           | 0.44                 | 0.034   | 0.382           |
| ENSMUST00000100526                              | ENSMUST00000100526        | ens Putative uncharacterized protein [Source:UniProtKB/TrEMBL;Acc:Q3V011] [ENSMUST00000100526]                                                           | 0.76                  | 0.014   | 0.412           | 0.87                  | 0.024   | 0.954           | 0.73                 | 0.014   | 0.256           |
| Tprg                                            | NM_175165                 | ref Mus musculus transformation related protein 63 regulated (Tprg), mRNA [NM_175165]                                                                    | 0.76                  | 0.013   | 0.412           | 0.48                  | 0.039   | 1.000           | 0.87                 | 0.001   | 0.071           |
| 1300010F03Rik                                   | NM_173758                 | ref Mus musculus RIKEN cDNA 1300010F03 gene (1300010F03Rik), transcript variant 2, mRNA [NM_173758]                                                      | 0.74                  | 0.000   | 0.048           | 0.24                  | 0.013   | 0.802           | 0.87                 | 0.000   | 0.003           |
| lrx2                                            | NM_010574                 | ref Mus musculus Iroquois related homeobox 2 (Drosophila) (lrx2), mRNA [NM_010574]                                                                       | 0.74                  | 0.012   | 0.412           | 0.74                  | 0.001   | 0.263           | 0.51                 | 0.012   | 0.234           |
| Zfp780b                                         | NM_001081021              | ref Mus musculus zinc finger protein 780B (Zfp780b), mRNA [NM_001081021]                                                                                 | 0.74                  | 0.001   | 0.210           | 0.71                  | 0.010   | 0.749           | 0.64                 | 0.010   | 0.208           |
| Cidea                                           | NM_007702                 | ref Mus musculus cell death-inducing DNA fragmentation factor, alpha subunit-like effector A (Cidea), mRNA [NM_007702]                                   | 0.74                  | 0.000   | 0.048           | 0.39                  | 0.000   | 0.099           | 0.99                 | 0.000   | 0.003           |
| chr11:33414450-33450750_R                       | chr11:33414450-33450750_R | lincRNA:chr11:33414450-33450750 reverse strand                                                                                                           | 0.73                  | 0.002   | 0.266           | 0.54                  | 0.022   | 0.922           | 0.53                 | 0.018   | 0.283           |
| chr13:21257927-21258387_R                       | chr13:21257927-21258387_R | lincRNA:chr13:21257927-21258387 reverse strand                                                                                                           | 0.72                  | 0.014   | 0.414           | 0.65                  | 0.019   | 0.881           | 0.58                 | 0.028   | 0.349           |
| 1300010F03Rik                                   | NM_027906                 | ref Mus musculus RIKEN cDNA 1300010F03 gene (1300010F03Rik), transcript variant 1, mRNA [NM_027906]                                                      | 0.71                  | 0.000   | 0.064           | 0.35                  | 0.001   | 0.317           | 0.90                 | 0.000   | 0.003           |
| Serinc2                                         | NM_172702                 | ref Mus musculus serine incorporator 2 (Serinc2), mRNA [NM_172702]                                                                                       | 0.70                  | 0.013   | 0.412           | 0.48                  | 0.014   | 0.816           | 1.11                 | 0.000   | 0.011           |
| ENSMUST00000077447                              | ENSMUST00000077447        | ens polypeptide N-acetylgalactosaminyltransferase-like 6 [Source:RefSeq peptide;Acc:NP_778197] [ENSMUST00000077447]                                      | 0.70                  | 0.004   | 0.325           | 0.60                  | 0.015   | 0.831           | 0.53                 | 0.025   | 0.330           |
| Grk5                                            | NM_018869                 | ref Mus musculus G protein-coupled receptor kinase 5 (Grk5), mRNA [NM_018869]                                                                            | 0.70                  | 0.000   | 0.045           | 0.27                  | 0.002   | 0.395           | 0.72                 | 0.000   | 0.006           |

Online Supplemental Table IV: All Three Overlap

| Gene Symbol                        | RefSeq                      | Description                                                                                                                                            | logFC<br>mG4H-<br>STZ | P-value | Adj.<br>P-value | logFC<br>mG4H-<br>Veh | P-value | Adj.<br>P-value | logFC<br>Con-<br>STZ | P-value | Adj.<br>P-value |
|------------------------------------|-----------------------------|--------------------------------------------------------------------------------------------------------------------------------------------------------|-----------------------|---------|-----------------|-----------------------|---------|-----------------|----------------------|---------|-----------------|
| <b>Tlr4</b>                        | NM_021297                   | ref Mus musculus toll-like receptor 4 (Tlr4), mRNA [NM_021297]                                                                                         | 0.69                  | 0.000   | 0.117           | 0.33                  | 0.006   | 0.661           | 0.98                 | 0.000   | 0.016           |
| <b>chr16:21307869-21308193_F</b>   | chr16:21307869-21308193_F   | lincRNA:chr16:21307869-21308193 forward strand                                                                                                         | 0.69                  | 0.010   | 0.404           | 0.55                  | 0.036   | 1.000           | 0.48                 | 0.049   | 0.453           |
| <b>4930455J16Rik</b>               | AK030052                    | gb Mus musculus adult male testis cDNA, RIKEN full-length enriched library, clone:4932418C03 product:unclassifiable, full insert sequence. [AK030052]  | 0.68                  | 0.003   | 0.308           | 0.38                  | 0.032   | 1.000           | 0.46                 | 0.016   | 0.274           |
| <b>Rad51l1</b>                     | ENSMUST00000079533          | ens RAD51-like 1 (S. cerevisiae) Gene [Source:MGI Symbol;Acc:MGI:1099436] [ENSMUST00000079533]                                                         | 0.67                  | 0.013   | 0.412           | 0.52                  | 0.038   | 1.000           | 0.61                 | 0.005   | 0.149           |
| <b>chr13:113555055-113564665_F</b> | chr13:113555055-113564665_F | lincRNA:chr13:113555055-113564665 forward strand                                                                                                       | 0.67                  | 0.002   | 0.272           | 0.36                  | 0.023   | 0.943           | 0.90                 | 0.000   | 0.012           |
| <b>chr8:71526892-71527500_R</b>    | chr8:71526892-71527500_R    | lincRNA:chr8:71526892-71527500 reverse strand                                                                                                          | 0.67                  | 0.024   | 0.461           | 0.66                  | 0.039   | 1.000           | 0.65                 | 0.031   | 0.371           |
| <b>chr14:79311982-79334451_F</b>   | chr14:79311982-79334451_F   | lincRNA:chr14:79311982-79334451 forward strand                                                                                                         | 0.66                  | 0.007   | 0.377           | 0.29                  | 0.009   | 0.716           | 0.62                 | 0.001   | 0.049           |
| <b>Decr1</b>                       | NM_026172                   | ref Mus musculus 2,4-dienoyl CoA reductase 1, mitochondrial (Decr1), nuclear gene encoding mitochondrial protein, mRNA [NM_026172]                     | 0.65                  | 0.000   | 0.117           | 0.35                  | 0.003   | 0.495           | 0.79                 | 0.000   | 0.002           |
| <b>Igf2bp2</b>                     | NM_183029                   | ref Mus musculus insulin-like growth factor 2 mRNA binding protein 2 (Igf2bp2), mRNA [NM_183029]                                                       | 0.64                  | 0.002   | 0.281           | 0.46                  | 0.001   | 0.284           | 0.92                 | 0.000   | 0.032           |
| <b>Cnn1</b>                        | NM_009922                   | ref Mus musculus calponin 1 (Cnn1), mRNA [NM_009922]                                                                                                   | 0.63                  | 0.016   | 0.426           | 0.43                  | 0.047   | 1.000           | 0.34                 | 0.027   | 0.343           |
| <b>Ier3</b>                        | NM_133662                   | ref Mus musculus immediate early response 3 (Ier3), mRNA [NM_133662]                                                                                   | 0.63                  | 0.003   | 0.281           | 0.36                  | 0.001   | 0.263           | 0.71                 | 0.000   | 0.040           |
| <b>4833439F03Rik</b>               | AK019523                    | gb Mus musculus 0 day neonate head cDNA, RIKEN full-length enriched library, clone:4833439F03 product:unclassifiable, full insert sequence. [AK019523] | 0.63                  | 0.000   | 0.048           | 0.40                  | 0.000   | 0.106           | 0.66                 | 0.000   | 0.009           |
| <b>Vmn2r-ps26</b>                  | XM_906846                   | ref PREDICTED: Mus musculus predicted gene, EG632649 (EG632649), mRNA [XM_906846]                                                                      | 0.63                  | 0.007   | 0.374           | 0.65                  | 0.005   | 0.578           | 0.50                 | 0.041   | 0.418           |
| <b>Il1rl1</b>                      | NM_010743                   | ref Mus musculus interleukin 1 receptor-like 1 (Il1rl1), transcript variant 2, mRNA [NM_010743]                                                        | 0.62                  | 0.007   | 0.377           | 0.77                  | 0.006   | 0.636           | 0.63                 | 0.009   | 0.204           |
| <b>Elmod3</b>                      | ENSMUST00000114069          | ens ELMO/CED-12 domain containing 3 Gene [Source:MGI (curated);Acc:MGI:2445168] [ENSMUST00000114069]                                                   | 0.61                  | 0.000   | 0.048           | 0.16                  | 0.044   | 1.000           | 0.63                 | 0.000   | 0.005           |
| <b>LOC100045616</b>                | XM_001474612                | ref PREDICTED: Mus musculus similar to ribonuclease 7 (LOC100045616), mRNA [XM_001474612]                                                              | 0.60                  | 0.034   | 0.493           | 0.39                  | 0.042   | 1.000           | 0.38                 | 0.044   | 0.432           |
| <b>chr16:30195156-30200385_F</b>   | chr16:30195156-30200385_F   | lincRNA:chr16:30195156-30200385 forward strand                                                                                                         | 0.60                  | 0.000   | 0.160           | 0.59                  | 0.001   | 0.263           | 0.41                 | 0.045   | 0.437           |
| <b>LOC676546</b>                   | XM_990990                   | ref PREDICTED: Mus musculus similar to COLLAGEN family member (col-183) (LOC676546), mRNA [XM_990990]                                                  | 0.60                  | 0.013   | 0.412           | 0.20                  | 0.009   | 0.720           | 0.77                 | 0.000   | 0.004           |

Online Supplemental Table IV: All Three Overlap

| Gene Symbol                | RefSeq                     | Description                                                                                                                                | logFC<br>mG4H-<br>STZ | P-value | Adj.<br>P-value | logFC<br>mG4H-<br>Veh | P-value | Adj.<br>P-value | logFC<br>Con-<br>STZ | P-value | Adj.<br>P-value |
|----------------------------|----------------------------|--------------------------------------------------------------------------------------------------------------------------------------------|-----------------------|---------|-----------------|-----------------------|---------|-----------------|----------------------|---------|-----------------|
| Fkbp10                     | NM_010221                  | ref Mus musculus FK506 binding protein 10 (Fkbp10), transcript variant 1, mRNA [NM_010221]                                                 | 0.60                  | 0.002   | 0.264           | 0.33                  | 0.002   | 0.401           | 0.92                 | 0.000   | 0.000           |
| chr15:96984422-97000322_R  | chr15:96984422-97000322_R  | lincRNA:chr15:96984422-97000322 reverse strand                                                                                             | 0.59                  | 0.007   | 0.377           | 0.53                  | 0.018   | 0.878           | 0.73                 | 0.002   | 0.100           |
| Siglec5                    | NM_145581                  | ref Mus musculus sialic acid binding Ig-like lectin 5 (Siglec5), mRNA [NM_145581]                                                          | 0.58                  | 0.001   | 0.227           | 0.39                  | 0.041   | 1.000           | 0.54                 | 0.006   | 0.157           |
| Lgals4                     | NM_010706                  | ref Mus musculus lectin, galactose binding, soluble 4 (Lgals4), mRNA [NM_010706]                                                           | 0.57                  | 0.003   | 0.281           | 0.37                  | 0.043   | 1.000           | 0.74                 | 0.001   | 0.049           |
| Slc38a2                    | NM_175121                  | ref Mus musculus solute carrier family 38, member 2 (Slc38a2), mRNA [NM_175121]                                                            | 0.57                  | 0.003   | 0.281           | 0.20                  | 0.030   | 0.998           | 0.63                 | 0.000   | 0.044           |
| A_55_P2156096              | A_55_P2156096              | Unknown                                                                                                                                    | 0.57                  | 0.043   | 0.510           | 0.52                  | 0.037   | 1.000           | 0.60                 | 0.018   | 0.281           |
| Gnas                       | NM_201617                  | ref Mus musculus GNAS (guanine nucleotide binding protein, alpha stimulating) complex locus (Gnas), transcript variant 6, mRNA [NM_201617] | 0.57                  | 0.025   | 0.465           | 0.50                  | 0.003   | 0.496           | 0.62                 | 0.003   | 0.125           |
| Ntn1                       | NM_008744                  | ref Mus musculus netrin 1 (Ntn1), mRNA [NM_008744]                                                                                         | 0.57                  | 0.005   | 0.343           | 0.29                  | 0.024   | 0.954           | 0.37                 | 0.021   | 0.303           |
| ENSMUST00000100797         | ENSMUST00000100797         | Unknown                                                                                                                                    | 0.56                  | 0.019   | 0.441           | 0.61                  | 0.050   | 1.000           | 0.67                 | 0.007   | 0.182           |
| Gatsl2                     | NM_030719                  | ref Mus musculus GATS protein-like 2 (Gatsl2), mRNA [NM_030719]                                                                            | 0.56                  | 0.007   | 0.370           | 0.28                  | 0.001   | 0.317           | 0.43                 | 0.015   | 0.259           |
| Rbpjl                      | NM_009036                  | ref Mus musculus recombination signal binding protein for immunoglobulin kappa J region-like (Rbpjl), mRNA [NM_009036]                     | 0.55                  | 0.012   | 0.409           | 0.41                  | 0.018   | 0.863           | 0.35                 | 0.017   | 0.274           |
| Dyx1c1                     | NM_026314                  | ref Mus musculus dyslexia susceptibility 1 candidate 1 homolog (human) (Dyx1c1), transcript variant 1, mRNA [NM_026314]                    | 0.55                  | 0.018   | 0.436           | 0.34                  | 0.010   | 0.752           | 0.26                 | 0.043   | 0.429           |
| chr3:100363012-100369462_R | chr3:100363012-100369462_R | lincRNA:chr3:100363012-100369462 reverse strand                                                                                            | 0.54                  | 0.009   | 0.398           | 0.52                  | 0.010   | 0.743           | 0.55                 | 0.002   | 0.097           |
| Rabgap1l                   | NM_013862                  | ref Mus musculus RAB GTPase activating protein 1-like (Rabgap1l), transcript variant 1, mRNA [NM_013862]                                   | 0.54                  | 0.002   | 0.276           | 0.33                  | 0.001   | 0.327           | 0.36                 | 0.003   | 0.107           |
| Zyx                        | NM_011777                  | ref Mus musculus zyxin (Zyx), mRNA [NM_011777]                                                                                             | 0.54                  | 0.001   | 0.188           | 0.18                  | 0.027   | 0.981           | 0.62                 | 0.000   | 0.024           |
| Phka1                      | NM_008832                  | ref Mus musculus phosphorylase kinase alpha 1 (Phka1), transcript variant 1, mRNA [NM_008832]                                              | 0.54                  | 0.010   | 0.400           | 0.17                  | 0.041   | 1.000           | 0.39                 | 0.017   | 0.278           |
| Mtnr1a                     | NM_008639                  | ref Mus musculus melatonin receptor 1A (Mtnr1a), mRNA [NM_008639]                                                                          | 0.54                  | 0.043   | 0.510           | 0.49                  | 0.036   | 1.000           | 0.64                 | 0.004   | 0.135           |
| 1110036O03Rik              | NM_176830                  | ref Mus musculus RIKEN cDNA 1110036O03 gene (1110036O03Rik), mRNA [NM_176830]                                                              | 0.54                  | 0.000   | 0.090           | 0.32                  | 0.001   | 0.263           | 0.80                 | 0.000   | 0.002           |
| ENSMUST00000100426         | ENSMUST00000100426         | ens Putative uncharacterized protein [Source:UniProtKB/TrEMBL;Acc:Q3TYJ8] [ENSMUST00000100426]                                             | 0.53                  | 0.020   | 0.443           | 0.55                  | 0.014   | 0.825           | 0.55                 | 0.028   | 0.349           |

Online Supplemental Table IV: All Three Overlap

| Gene Symbol                | RefSeq                     | Description                                                                                                                                         | logFC<br>mG4H-<br>STZ | P-value | Adj.<br>P-value | logFC<br>mG4H-<br>Veh | P-value | Adj.<br>P-value | logFC<br>Con-<br>STZ | P-value | Adj.<br>P-value |
|----------------------------|----------------------------|-----------------------------------------------------------------------------------------------------------------------------------------------------|-----------------------|---------|-----------------|-----------------------|---------|-----------------|----------------------|---------|-----------------|
| Gm2769                     | XM_001474679               | ref PREDICTED: Mus musculus hypothetical protein LOC100040437 (LOC100040437), mRNA [XM_001474679]                                                   | 0.53                  | 0.005   | 0.346           | 0.32                  | 0.010   | 0.747           | 0.34                 | 0.032   | 0.371           |
| Mrgpra1                    | NM_153095                  | ref Mus musculus MAS-related GPR, member A1 (Mrgpra1), mRNA [NM_153095]                                                                             | 0.53                  | 0.021   | 0.447           | 0.65                  | 0.006   | 0.643           | 0.57                 | 0.017   | 0.279           |
| chr9:113648970-113715170_R | chr9:113648970-113715170_R | lincRNA:chr9:113648970-113715170 reverse strand                                                                                                     | 0.53                  | 0.009   | 0.397           | 0.51                  | 0.017   | 0.861           | 0.61                 | 0.006   | 0.162           |
| Slc1a1                     | NM_009199                  | ref Mus musculus solute carrier family 1 (neuronal/epithelial high affinity glutamate transporter, system Xag), member 1 (Slc1a1), mRNA [NM_009199] | 0.52                  | 0.001   | 0.167           | 0.41                  | 0.003   | 0.475           | 0.59                 | 0.003   | 0.115           |
| Serp2                      | NM_001160326               | ref Mus musculus stress-associated endoplasmic reticulum protein family member 2 (Serp2), transcript variant 1, mRNA [NM_001160326]                 | 0.52                  | 0.001   | 0.222           | 0.15                  | 0.037   | 1.000           | 0.36                 | 0.002   | 0.099           |
| ENSMUST00000065540         | ENSMUST00000065540         | ens carcinoembryonic antigen-related cell adhesion molecule 3 Gene [Source:MGI (curated);Acc:MGI:3646296] [ENSMUST00000065540]                      | 0.51                  | 0.035   | 0.494           | 0.46                  | 0.003   | 0.500           | 0.37                 | 0.038   | 0.402           |
| Fbxo9                      | NM_023605                  | ref Mus musculus f-box protein 9 (Fbxo9), transcript variant 1, mRNA [NM_023605]                                                                    | 0.51                  | 0.016   | 0.425           | 0.16                  | 0.049   | 1.000           | 0.29                 | 0.017   | 0.279           |
| Ephx2                      | NM_007940                  | ref Mus musculus epoxide hydrolase 2, cytoplasmic (Ephx2), mRNA [NM_007940]                                                                         | 0.50                  | 0.001   | 0.227           | 0.24                  | 0.016   | 0.848           | 0.61                 | 0.000   | 0.017           |
| Sykb                       | NM_011518                  | ref Mus musculus spleen tyrosine kinase (Sykb), mRNA [NM_011518]                                                                                    | 0.50                  | 0.000   | 0.084           | 0.19                  | 0.015   | 0.832           | 0.68                 | 0.000   | 0.004           |
| Man1a2                     | NM_010763                  | ref Mus musculus mannosidase, alpha, class 1A, member 2 (Man1a2), mRNA [NM_010763]                                                                  | 0.50                  | 0.009   | 0.399           | 0.28                  | 0.045   | 1.000           | 0.47                 | 0.010   | 0.208           |
| ENSMUST00000113576         | ENSMUST00000113576         | ens runt related transcription factor 2 Gene [Source:MGI Symbol;Acc:MGI:99829] [ENSMUST00000113576]                                                 | 0.50                  | 0.007   | 0.382           | 0.44                  | 0.020   | 0.891           | 0.45                 | 0.010   | 0.207           |
| chr2:72818943-72826893_R   | chr2:72818943-72826893_R   | lincRNA:chr2:72818943-72826893 reverse strand                                                                                                       | 0.50                  | 0.038   | 0.498           | 0.61                  | 0.011   | 0.771           | 0.50                 | 0.033   | 0.377           |
| Lpcat3                     | NM_145130                  | ref Mus musculus lysophosphatidylcholine acyltransferase 3 (Lpcat3), mRNA [NM_145130]                                                               | 0.50                  | 0.006   | 0.360           | 0.19                  | 0.048   | 1.000           | 0.67                 | 0.000   | 0.017           |
| Dbi                        | NM_001037999               | ref Mus musculus diazepam binding inhibitor (Dbi), transcript variant 1, mRNA [NM_001037999]                                                        | 0.50                  | 0.000   | 0.148           | 0.40                  | 0.000   | 0.050           | 0.61                 | 0.000   | 0.004           |
| chr9:121845920-121858120_R | chr9:121845920-121858120_R | lincRNA:chr9:121845920-121858120 reverse strand                                                                                                     | 0.49                  | 0.036   | 0.495           | 0.45                  | 0.043   | 1.000           | 0.53                 | 0.015   | 0.261           |
| Dbi                        | NM_001037999               | ref Mus musculus diazepam binding inhibitor (Dbi), transcript variant 1, mRNA [NM_001037999]                                                        | 0.49                  | 0.003   | 0.281           | 0.35                  | 0.000   | 0.131           | 0.66                 | 0.000   | 0.004           |
| chr6:91928958-91936887_R   | chr6:91928958-91936887_R   | lincRNA:chr6:91928958-91936887 reverse strand                                                                                                       | 0.49                  | 0.002   | 0.271           | 0.20                  | 0.039   | 1.000           | 0.35                 | 0.005   | 0.154           |



| Online Supplemental Table IV: All Three Overlap |                            |                                                                                                                  |                       |         |                 |                       |         |                 |                      |         |                 |
|-------------------------------------------------|----------------------------|------------------------------------------------------------------------------------------------------------------|-----------------------|---------|-----------------|-----------------------|---------|-----------------|----------------------|---------|-----------------|
| Gene Symbol                                     | RefSeq                     | Description                                                                                                      | logFC<br>mG4H-<br>STZ | P-value | Adj.<br>P-value | logFC<br>mG4H-<br>Veh | P-value | Adj.<br>P-value | logFC<br>Con-<br>STZ | P-value | Adj.<br>P-value |
| Ttll11                                          | NM_029774                  | ref Mus musculus tubulin tyrosine ligase-like family, member 11 (Ttll11), transcript variant 1, mRNA [NM_029774] | 0.49                  | 0.005   | 0.338           | 0.28                  | 0.044   | 1.000           | 0.55                 | 0.001   | 0.077           |
| LOC100045753                                    | XM_001474871               | ref PREDICTED: Mus musculus similar to headcase homolog (LOC100045753), mRNA [XM_001474871]                      | 0.49                  | 0.002   | 0.279           | 0.21                  | 0.012   | 0.786           | 0.28                 | 0.026   | 0.338           |
| Zdhhc14                                         | NM_146073                  | ref Mus musculus zinc finger, DHHC domain containing 14 (Zdhhc14), mRNA [NM_146073]                              | 0.48                  | 0.006   | 0.356           | 0.16                  | 0.046   | 1.000           | 0.30                 | 0.045   | 0.437           |
| Tshz1                                           | NM_001081300               | ref Mus musculus teashirt zinc finger family member 1 (Tshz1), mRNA [NM_001081300]                               | 0.47                  | 0.001   | 0.183           | 0.23                  | 0.029   | 0.986           | 0.44                 | 0.000   | 0.023           |
| chr18:25622407-25635118_R                       | chr18:25622407-25635118_R  | lincRNA:chr18:25622407-25635118 reverse strand                                                                   | 0.46                  | 0.045   | 0.513           | 0.57                  | 0.026   | 0.973           | 0.47                 | 0.049   | 0.453           |
| 2310044G17Rik                                   | NM_173735                  | ref Mus musculus RIKEN cDNA 2310044G17 gene (2310044G17Rik), transcript variant 1, mRNA [NM_173735]              | 0.45                  | 0.017   | 0.432           | 0.18                  | 0.033   | 1.000           | 0.37                 | 0.006   | 0.156           |
| Slmap                                           | NM_032008                  | ref Mus musculus sarcolemma associated protein (Slmap), mRNA [NM_032008]                                         | 0.45                  | 0.008   | 0.393           | 0.21                  | 0.021   | 0.916           | 0.47                 | 0.002   | 0.096           |
| chr17:6265275-6362150_F                         | chr17:6265275-6362150_F    | lincRNA:chr17:6265275-6362150 forward strand                                                                     | 0.45                  | 0.002   | 0.279           | 0.28                  | 0.033   | 1.000           | 0.34                 | 0.016   | 0.270           |
| Gzmc                                            | NM_010371                  | ref Mus musculus granzyme C (Gzmc), mRNA [NM_010371]                                                             | 0.44                  | 0.022   | 0.453           | 0.49                  | 0.011   | 0.770           | 0.37                 | 0.049   | 0.455           |
| LOC100045978                                    | XM_001475282               | ref PREDICTED: Mus musculus hypothetical protein LOC100045978 (LOC100045978), mRNA [XM_001475282]                | 0.44                  | 0.024   | 0.459           | 0.47                  | 0.013   | 0.808           | 0.48                 | 0.045   | 0.439           |
| D830030K20Rik                                   | NM_177135                  | ref Mus musculus RIKEN cDNA D830030K20 gene (D830030K20Rik), mRNA [NM_177135]                                    | 0.44                  | 0.007   | 0.377           | 0.38                  | 0.024   | 0.957           | 0.40                 | 0.032   | 0.375           |
| chr9:118059348-118079494_F                      | chr9:118059348-118079494_F | lincRNA:chr9:118059348-118079494 forward strand                                                                  | 0.44                  | 0.011   | 0.407           | 0.38                  | 0.016   | 0.848           | 0.38                 | 0.034   | 0.383           |
| chr12:16447157-16447657_F                       | chr12:16447157-16447657_F  | lincRNA:chr12:16447157-16447657 forward strand                                                                   | 0.44                  | 0.041   | 0.505           | 0.53                  | 0.016   | 0.848           | 0.63                 | 0.016   | 0.272           |
| chr4:138653689-138688814_R                      | chr4:138653689-138688814_R | lincRNA:chr4:138653689-138688814 reverse strand                                                                  | 0.44                  | 0.036   | 0.495           | 0.74                  | 0.045   | 1.000           | 0.54                 | 0.005   | 0.155           |
| Gm5077                                          | NM_173864                  | ref Mus musculus predicted gene 5077 (Gm5077), mRNA [NM_173864]                                                  | 0.43                  | 0.034   | 0.493           | 0.36                  | 0.045   | 1.000           | 0.39                 | 0.040   | 0.414           |
| Fam189a2                                        | NM_001114174               | ref Mus musculus family with sequence similarity 189, member A2 (Fam189a2), mRNA [NM_001114174]                  | 0.43                  | 0.007   | 0.384           | 0.22                  | 0.038   | 1.000           | 0.30                 | 0.012   | 0.232           |
| Il18r1                                          | NM_001161842               | ref Mus musculus interleukin 18 receptor 1 (Il18r1), transcript variant 2, mRNA [NM_001161842]                   | 0.43                  | 0.025   | 0.463           | 0.39                  | 0.031   | 0.998           | 0.44                 | 0.011   | 0.217           |
| Usf2                                            | NM_011680                  | ref Mus musculus upstream transcription factor 2 (Usf2), mRNA [NM_011680]                                        | 0.43                  | 0.046   | 0.513           | 0.31                  | 0.002   | 0.342           | 0.20                 | 0.045   | 0.439           |

Online Supplemental Table IV: All Three Overlap

| Gene Symbol                       | RefSeq                     | Description                                                                                                          | logFC<br>mG4H-<br>STZ | P-value | Adj.<br>P-value | logFC<br>mG4H-<br>Veh | P-value | Adj.<br>P-value | logFC<br>Con-<br>STZ | P-value | Adj.<br>P-value |
|-----------------------------------|----------------------------|----------------------------------------------------------------------------------------------------------------------|-----------------------|---------|-----------------|-----------------------|---------|-----------------|----------------------|---------|-----------------|
| <b>Mapre1</b>                     | NM_007896                  | ref Mus musculus microtubule-associated protein, RP/EB family, member 1 (Mapre1), mRNA [NM_007896]                   | 0.41                  | 0.003   | 0.288           | 0.18                  | 0.046   | 1.000           | 0.24                 | 0.019   | 0.291           |
| <b>Pex11a</b>                     | NM_011068                  | ref Mus musculus peroxisomal biogenesis factor 11 alpha (Pex11a), mRNA [NM_011068]                                   | 0.40                  | 0.010   | 0.405           | 0.32                  | 0.000   | 0.181           | 0.60                 | 0.000   | 0.017           |
| <b>Fgf21</b>                      | NM_020013                  | ref Mus musculus fibroblast growth factor 21 (Fgf21), mRNA [NM_020013]                                               | 0.40                  | 0.042   | 0.508           | 0.66                  | 0.005   | 0.606           | 1.27                 | 0.000   | 0.022           |
| <b>chr1:196445304-196445818_R</b> | chr1:196445304-196445818_R | lincRNA:chr1:196445304-196445818 reverse strand                                                                      | 0.40                  | 0.006   | 0.356           | 0.29                  | 0.026   | 0.971           | 0.34                 | 0.012   | 0.233           |
| <b>Mef2d</b>                      | NM_133665                  | ref Mus musculus myocyte enhancer factor 2D (Mef2d), mRNA [NM_133665]                                                | 0.40                  | 0.022   | 0.450           | 0.30                  | 0.018   | 0.864           | 0.29                 | 0.045   | 0.439           |
| <b>Kank1</b>                      | NM_181404                  | ref Mus musculus KN motif and ankyrin repeat domains 1 (Kank1), mRNA [NM_181404]                                     | 0.40                  | 0.009   | 0.398           | 0.17                  | 0.048   | 1.000           | 0.46                 | 0.002   | 0.087           |
| <b>chr2:35828611-35838083_F</b>   | chr2:35828611-35838083_F   | lincRNA:chr2:35828611-35838083 forward strand                                                                        | 0.39                  | 0.030   | 0.478           | 0.47                  | 0.024   | 0.952           | 0.68                 | 0.000   | 0.034           |
| <b>Amd-ps7</b>                    | XR_034456                  | ref PREDICTED: Mus musculus similar to Adenosylmethionine decarboxylase 1 (LOC668888), misc RNA [XR_034456]          | 0.39                  | 0.044   | 0.511           | 0.23                  | 0.022   | 0.935           | 0.46                 | 0.017   | 0.280           |
| <b>Fgf1</b>                       | NM_010197                  | ref Mus musculus fibroblast growth factor 1 (Fgf1), mRNA [NM_010197]                                                 | 0.38                  | 0.001   | 0.248           | 0.31                  | 0.002   | 0.357           | 0.26                 | 0.010   | 0.209           |
| <b>Acot4</b>                      | NM_134247                  | ref Mus musculus acyl-CoA thioesterase 4 (Acot4), mRNA [NM_134247]                                                   | 0.38                  | 0.037   | 0.496           | 0.35                  | 0.020   | 0.887           | 0.61                 | 0.002   | 0.099           |
| <b>Gm13272</b>                    | NM_001161608               | ref Mus musculus predicted gene 13272 (Gm13272), mRNA [NM_001161608]                                                 | 0.37                  | 0.012   | 0.410           | 0.38                  | 0.005   | 0.588           | 0.68                 | 0.001   | 0.053           |
| <b>Slc24a4</b>                    | NM_172152                  | ref Mus musculus solute carrier family 24 (sodium/potassium/calcium exchanger), member 4 (Slc24a4), mRNA [NM_172152] | 0.37                  | 0.018   | 0.437           | 0.42                  | 0.001   | 0.261           | 0.43                 | 0.002   | 0.096           |
| <b>Smad7</b>                      | NM_001042660               | ref Mus musculus MAD homolog 7 (Drosophila) (Smad7), mRNA [NM_001042660]                                             | 0.36                  | 0.019   | 0.437           | 0.32                  | 0.028   | 0.983           | 0.52                 | 0.001   | 0.051           |
| <b>Olfr1037</b>                   | NM_001011532               | ref Mus musculus olfactory receptor 1037 (Olfr1037), mRNA [NM_001011532]                                             | 0.36                  | 0.012   | 0.408           | 0.41                  | 0.003   | 0.496           | 0.35                 | 0.007   | 0.179           |
| <b>Gm5144</b>                     | XR_035213                  | ref PREDICTED: Mus musculus hypothetical LOC381002 (LOC381002), misc RNA [XR_035213]                                 | 0.36                  | 0.029   | 0.477           | 0.36                  | 0.007   | 0.679           | 0.60                 | 0.001   | 0.064           |
| <b>chr4:12159175-12175725_R</b>   | chr4:12159175-12175725_R   | lincRNA:chr4:12159175-12175725 reverse strand                                                                        | 0.35                  | 0.021   | 0.448           | 0.30                  | 0.029   | 0.988           | 0.37                 | 0.036   | 0.392           |
| <b>Slc43a2</b>                    | NM_173388                  | ref Mus musculus solute carrier family 43, member 2 (Slc43a2), mRNA [NM_173388]                                      | 0.35                  | 0.021   | 0.449           | 0.35                  | 0.011   | 0.773           | 0.35                 | 0.023   | 0.318           |
| <b>Pth1r</b>                      | NM_011199                  | ref Mus musculus parathyroid hormone 1 receptor (Pth1r), transcript variant 1, mRNA [NM_011199]                      | 0.35                  | 0.016   | 0.428           | 0.50                  | 0.000   | 0.084           | 0.36                 | 0.001   | 0.060           |
| <b>SImap</b>                      | NM_032008                  | ref Mus musculus sarcolemma associated protein (SImap), mRNA [NM_032008]                                             | 0.34                  | 0.005   | 0.349           | 0.18                  | 0.028   | 0.983           | 0.45                 | 0.000   | 0.029           |

Online Supplemental Table IV: All Three Overlap

| Gene Symbol          | RefSeq             | Description                                                                                                                  | logFC<br>mG4H-<br>STZ | P-value | Adj.<br>P-value | logFC<br>mG4H-<br>Veh | P-value | Adj.<br>P-value | logFC<br>Con-<br>STZ | P-value | Adj.<br>P-value |
|----------------------|--------------------|------------------------------------------------------------------------------------------------------------------------------|-----------------------|---------|-----------------|-----------------------|---------|-----------------|----------------------|---------|-----------------|
| <b>Nudt7</b>         | NM_024437          | ref Mus musculus nudix (nucleoside diphosphate linked moiety X)-type motif 7 (Nudt7), transcript variant 1, mRNA [NM_024437] | 0.33                  | 0.010   | 0.401           | 0.27                  | 0.020   | 0.890           | 0.27                 | 0.032   | 0.372           |
| <b>Dhx32</b>         | NM_133941          | ref Mus musculus DEAH (Asp-Glu-Ala-His) box polypeptide 32 (Dhx32), mRNA [NM_133941]                                         | 0.31                  | 0.012   | 0.410           | 0.21                  | 0.034   | 1.000           | 0.32                 | 0.005   | 0.154           |
| <b>Agpat3</b>        | NM_053014          | ref Mus musculus 1-acylglycerol-3-phosphate O-acyltransferase 3 (Agpat3), mRNA [NM_053014]                                   | 0.30                  | 0.009   | 0.397           | 0.20                  | 0.039   | 1.000           | 0.46                 | 0.001   | 0.063           |
| <b>2310022B05Rik</b> | NM_175149          | ref Mus musculus RIKEN cDNA 2310022B05 gene (2310022B05Rik), mRNA [NM_175149]                                                | 0.29                  | 0.022   | 0.451           | 0.27                  | 0.002   | 0.357           | 0.29                 | 0.008   | 0.186           |
| <b>Gm13275</b>       | NM_001085533       | ref Mus musculus predicted gene 13275 (Gm13275), mRNA [NM_001085533]                                                         | 0.29                  | 0.049   | 0.519           | 0.31                  | 0.027   | 0.983           | 0.55                 | 0.001   | 0.079           |
| <b>Hipk2</b>         | NM_001136065       | ref Mus musculus homeodomain interacting protein kinase 2 (Hipk2), transcript variant 1, mRNA [NM_001136065]                 | 0.27                  | 0.039   | 0.501           | 0.15                  | 0.030   | 0.998           | 0.23                 | 0.022   | 0.315           |
| <b>Socs7</b>         | NM_138657          | ref Mus musculus suppressor of cytokine signaling 7 (Socs7), mRNA [NM_138657]                                                | 0.22                  | 0.035   | 0.494           | 0.20                  | 0.015   | 0.830           | 0.19                 | 0.044   | 0.435           |
| <b>Nudt7</b>         | NM_024446          | ref Mus musculus nudix (nucleoside diphosphate linked moiety X)-type motif 7 (Nudt7), transcript variant 2, mRNA [NM_024446] | 0.20                  | 0.046   | 0.513           | 0.23                  | 0.004   | 0.554           | 0.22                 | 0.035   | 0.390           |
| <b>Ccni</b>          | NM_017367          | ref Mus musculus cyclin I (Ccni), mRNA [NM_017367]                                                                           | 0.20                  | 0.038   | 0.499           | 0.20                  | 0.016   | 0.848           | 0.24                 | 0.015   | 0.260           |
| <b>Fam134b</b>       | NM_025459          | ref Mus musculus family with sequence similarity 134, member B (Fam134b), transcript variant 2, mRNA [NM_025459]             | 0.96                  | 0.037   | 0.497           | -0.30                 | 0.017   | 0.854           | 0.99                 | 0.002   | 0.099           |
| <b>Myh7</b>          | NM_080728          | ref Mus musculus myosin, heavy polypeptide 7, cardiac muscle, beta (Myh7), mRNA [NM_080728]                                  | 0.96                  | 0.004   | 0.319           | -1.01                 | 0.004   | 0.574           | 1.64                 | 0.000   | 0.003           |
| <b>Ifitm1</b>        | NM_001112715       | ref Mus musculus interferon induced transmembrane protein 1 (Ifitm1), transcript variant 2, mRNA [NM_001112715]              | 0.96                  | 0.009   | 0.393           | -0.17                 | 0.043   | 1.000           | 1.05                 | 0.000   | 0.014           |
| <b>Gm7676</b>        | ENSMUST00000084055 | ref PREDICTED: Mus musculus predicted gene, EG665536 (EG665536), mRNA [XM_977607]                                            | 0.95                  | 0.010   | 0.403           | -0.21                 | 0.032   | 1.000           | 1.05                 | 0.000   | 0.024           |
| <b>LOC674761</b>     | XM_976893          | ref PREDICTED: Mus musculus similar to beta myosin heavy chain (LOC674761), mRNA [XM_976893]                                 | 0.79                  | 0.004   | 0.329           | -0.89                 | 0.017   | 0.854           | 1.22                 | 0.000   | 0.006           |
| <b>Chpf2</b>         | NM_133913          | ref Mus musculus chondroitin polymerizing factor 2 (Chpf2), mRNA [NM_133913]                                                 | 0.52                  | 0.041   | 0.505           | -0.21                 | 0.017   | 0.863           | 0.27                 | 0.017   | 0.278           |
| <b>1600029D21Rik</b> | NM_029639          | ref Mus musculus RIKEN cDNA 1600029D21 gene (1600029D21Rik), mRNA [NM_029639]                                                | 0.50                  | 0.011   | 0.407           | -0.41                 | 0.014   | 0.825           | 0.78                 | 0.003   | 0.112           |
| <b>Epor</b>          | NM_010149          | ref Mus musculus erythropoietin receptor (Epor), mRNA [NM_010149]                                                            | 0.38                  | 0.021   | 0.449           | -0.20                 | 0.028   | 0.983           | 0.60                 | 0.002   | 0.096           |

Online Supplemental Table IV: All Three Overlap

| Gene Symbol                      | RefSeq                    | Description                                                                                                                        | logFC<br>mG4H-<br>STZ | P-value | Adj.<br>P-value | logFC<br>mG4H-<br>Veh | P-value | Adj.<br>P-value | logFC<br>Con-<br>STZ | P-value | Adj.<br>P-value |
|----------------------------------|---------------------------|------------------------------------------------------------------------------------------------------------------------------------|-----------------------|---------|-----------------|-----------------------|---------|-----------------|----------------------|---------|-----------------|
| <b>Tenc1</b>                     | NM_153533                 | ref Mus musculus tensin like C1 domain-containing phosphatase (Tenc1), mRNA [NM_153533]                                            | 0.34                  | 0.049   | 0.519           | -0.16                 | 0.032   | 1.000           | 0.46                 | 0.000   | 0.043           |
| <b>Ldlrad3</b>                   | NM_178886                 | ref Mus musculus low density lipoprotein receptor class A domain containing 3 (Ldlrad3), mRNA [NM_178886]                          | -0.25                 | 0.025   | 0.463           | 0.15                  | 0.041   | 1.000           | -0.44                | 0.000   | 0.017           |
| <b>Cacna2d2</b>                  | NM_001174047              | ref Mus musculus calcium channel, voltage-dependent, alpha 2/delta subunit 2 (Cacna2d2), transcript variant 1, mRNA [NM_001174047] | -0.28                 | 0.019   | 0.440           | 0.48                  | 0.047   | 1.000           | -0.40                | 0.002   | 0.100           |
| <b>Whrn</b>                      | NM_001008791              | ref Mus musculus whirlin (Whrn), transcript variant 2, mRNA [NM_001008791]                                                         | -0.35                 | 0.022   | 0.450           | 0.40                  | 0.002   | 0.397           | -0.74                | 0.000   | 0.003           |
| <b>Calm1</b>                     | NM_009790                 | ref Mus musculus calmodulin 1 (Calm1), mRNA [NM_009790]                                                                            | -0.35                 | 0.026   | 0.470           | 0.18                  | 0.028   | 0.983           | -0.35                | 0.017   | 0.275           |
| <b>chr17:29571806-29603008_F</b> | chr17:29571806-29603008_F | lincRNA:chr17:29571806-29603008 forward strand                                                                                     | -0.35                 | 0.016   | 0.426           | 0.28                  | 0.029   | 0.992           | -0.74                | 0.000   | 0.011           |
| <b>3110056003Rik</b>             | NM_175195                 | ref Mus musculus RIKEN cDNA 3110056003 gene (3110056003Rik), mRNA [NM_175195]                                                      | -0.35                 | 0.032   | 0.484           | 0.17                  | 0.041   | 1.000           | -0.44                | 0.003   | 0.109           |
| <b>5033430115Rik</b>             | ENSMUST000000038032       | ens RIKEN cDNA 5033430115 gene Gene [Source:MGI Symbol;Acc:MGI:1923250] [ENSMUST00000038032]                                       | -0.38                 | 0.044   | 0.512           | 0.21                  | 0.015   | 0.831           | -0.47                | 0.016   | 0.270           |
| <b>Rab3a</b>                     | NM_001166399              | ref Mus musculus RAB3A, member RAS oncogene family (Rab3a), transcript variant 1, mRNA [NM_001166399]                              | -0.41                 | 0.014   | 0.413           | 0.21                  | 0.017   | 0.858           | -0.81                | 0.001   | 0.077           |
| <b>Egln3</b>                     | NM_028133                 | ref Mus musculus EGL nine homolog 3 (C. elegans) (Egln3), mRNA [NM_028133]                                                         | -0.50                 | 0.044   | 0.512           | 0.34                  | 0.022   | 0.922           | -0.64                | 0.010   | 0.214           |
| <b>Hr</b>                        | NM_021877                 | ref Mus musculus hairless (Hr), mRNA [NM_021877]                                                                                   | -0.50                 | 0.038   | 0.499           | 0.25                  | 0.024   | 0.957           | -0.50                | 0.004   | 0.130           |
| <b>Osta</b>                      | ENSMUST000000042042       | ens organic solute transporter alpha Gene [Source:MGI (curated);Acc:MGI:2146634] [ENSMUST00000042042]                              | -0.56                 | 0.035   | 0.495           | 0.47                  | 0.013   | 0.810           | -0.96                | 0.001   | 0.074           |
| <b>chr10:69669025-69686275_F</b> | chr10:69669025-69686275_F | lincRNA:chr10:69669025-69686275 forward strand                                                                                     | -0.65                 | 0.005   | 0.338           | 0.18                  | 0.043   | 1.000           | -0.99                | 0.000   | 0.007           |
| <b>Arhgef19</b>                  | NM_172520                 | ref Mus musculus Rho guanine nucleotide exchange factor (GEF) 19 (Arhgef19), mRNA [NM_172520]                                      | -0.67                 | 0.022   | 0.453           | 0.25                  | 0.017   | 0.854           | -0.95                | 0.001   | 0.059           |
| <b>Asap3</b>                     | NM_001008232              | ref Mus musculus ArfGAP with SH3 domain, ankyrin repeat and PH domain 3 (Asap3), mRNA [NM_001008232]                               | -0.68                 | 0.013   | 0.412           | 0.18                  | 0.043   | 1.000           | -0.79                | 0.010   | 0.208           |
| <b>Cxcl9</b>                     | NM_008599                 | ref Mus musculus chemokine (C-X-C motif) ligand 9 (Cxcl9), mRNA [NM_008599]                                                        | -0.69                 | 0.043   | 0.510           | 0.65                  | 0.036   | 1.000           | -0.57                | 0.018   | 0.286           |
| <b>Casq1</b>                     | NM_009813                 | ref Mus musculus calsequestrin 1 (Casq1), nuclear gene encoding mitochondrial protein, mRNA [NM_009813]                            | -0.79                 | 0.027   | 0.473           | 0.34                  | 0.035   | 1.000           | -0.94                | 0.001   | 0.077           |
| <b>Fam163b</b>                   | ENSMUST000000009360       | ens family with sequence similarity 163, member B Gene [Source:MGI (curated);Acc:MGI:1926106] [ENSMUST00000009360]                 | -0.81                 | 0.030   | 0.478           | 0.42                  | 0.003   | 0.463           | -0.95                | 0.001   | 0.054           |
| <b>Mgat3</b>                     | NM_010795                 | ref Mus musculus mannoside acetylglucosaminyltransferase 3 (Mgat3), mRNA [NM_010795]                                               | -0.90                 | 0.011   | 0.406           | 0.29                  | 0.023   | 0.946           | -1.17                | 0.001   | 0.068           |

Online Supplemental Table IV: All Three Overlap

| Gene Symbol               | RefSeq             | Description                                                                                                                                    | logFC<br>mG4H-<br>STZ | P-value | Adj.<br>P-value | logFC<br>mG4H-<br>Veh | P-value | Adj.<br>P-value | logFC<br>Con-<br>STZ | P-value | Adj.<br>P-value |
|---------------------------|--------------------|------------------------------------------------------------------------------------------------------------------------------------------------|-----------------------|---------|-----------------|-----------------------|---------|-----------------|----------------------|---------|-----------------|
| <b>Pnpla3</b>             | NM_054088          | ref Mus musculus patatin-like phospholipase domain containing 3 (Pnpla3), mRNA [NM_054088]                                                     | -0.96                 | 0.007   | 0.377           | 0.25                  | 0.037   | 1.000           | -1.22                | 0.000   | 0.019           |
| <b>Lingo3</b>             | NM_001013758       | ref Mus musculus leucine rich repeat and Ig domain containing 3 (Lingo3), mRNA [NM_001013758]                                                  | -1.12                 | 0.007   | 0.374           | 0.27                  | 0.007   | 0.679           | -1.79                | 0.000   | 0.029           |
| <b>Rtn4r</b>              | NM_022982          | ref Mus musculus reticulon 4 receptor (Rtn4r), mRNA [NM_022982]                                                                                | -1.24                 | 0.015   | 0.419           | 0.71                  | 0.007   | 0.686           | -1.20                | 0.003   | 0.106           |
| <b>Cln6</b>               | NM_001033175       | ref Mus musculus ceroid-lipofuscinosis, neuronal 6 (Cln6), mRNA [NM_001033175]                                                                 | -0.19                 | 0.046   | 0.513           | -0.32                 | 0.001   | 0.263           | -0.20                | 0.033   | 0.377           |
| <b>1810043G02Rik</b>      | NM_026431          | ref Mus musculus RIKEN cDNA 1810043G02 gene (1810043G02Rik), mRNA [NM_026431]                                                                  | -0.20                 | 0.050   | 0.520           | -0.17                 | 0.041   | 1.000           | -0.27                | 0.013   | 0.245           |
| <b>Abhd12</b>             | NM_024465          | ref Mus musculus abhydrolase domain containing 12 (Abhd12), mRNA [NM_024465]                                                                   | -0.21                 | 0.046   | 0.513           | -0.23                 | 0.016   | 0.854           | -0.19                | 0.042   | 0.426           |
| <b>Mrpl28</b>             | NM_024227          | ref Mus musculus mitochondrial ribosomal protein L28 (Mrpl28), nuclear gene encoding mitochondrial protein, mRNA [NM_024227]                   | -0.22                 | 0.039   | 0.500           | -0.17                 | 0.029   | 0.986           | -0.21                | 0.034   | 0.384           |
| <b>Gcsh</b>               | NM_026572          | ref Mus musculus glycine cleavage system protein H (aminomethyl carrier) (Gcsh), nuclear gene encoding mitochondrial protein, mRNA [NM_026572] | -0.22                 | 0.030   | 0.477           | -0.13                 | 0.050   | 1.000           | -0.20                | 0.021   | 0.306           |
| <b>Snrnp200</b>           | NM_177214          | ref Mus musculus small nuclear ribonucleoprotein 200 (U5) (Snrnp200), mRNA [NM_177214]                                                         | -0.22                 | 0.032   | 0.484           | -0.20                 | 0.010   | 0.743           | -0.19                | 0.028   | 0.348           |
| <b>Adk</b>                | NM_134079          | ref Mus musculus adenosine kinase (Adk), mRNA [NM_134079]                                                                                      | -0.22                 | 0.023   | 0.454           | -0.13                 | 0.045   | 1.000           | -0.24                | 0.022   | 0.310           |
| <b>Glud1</b>              | NM_008133          | ref Mus musculus glutamate dehydrogenase 1 (Glud1), nuclear gene encoding mitochondrial protein, mRNA [NM_008133]                              | -0.22                 | 0.018   | 0.437           | -0.29                 | 0.001   | 0.310           | -0.23                | 0.018   | 0.282           |
| <b>ENSMUST00000067987</b> | ENSMUST00000067987 | ens Putative uncharacterized protein Fragment [Source:UniProtKB/TrEMBL;Acc:Q8CEJ8] [ENSMUST00000067987]                                        | -0.23                 | 0.028   | 0.474           | -0.25                 | 0.019   | 0.883           | -0.35                | 0.010   | 0.208           |
| <b>Fam185a</b>            | NM_177869          | ref Mus musculus family with sequence similarity 185, member A (Fam185a), mRNA [NM_177869]                                                     | -0.23                 | 0.031   | 0.480           | -0.18                 | 0.044   | 1.000           | -0.25                | 0.022   | 0.314           |
| <b>Ugp2</b>               | NM_139297          | ref Mus musculus UDP-glucose pyrophosphorylase 2 (Ugp2), mRNA [NM_139297]                                                                      | -0.24                 | 0.028   | 0.476           | -0.17                 | 0.028   | 0.983           | -0.23                | 0.024   | 0.324           |
| <b>L2hgdh</b>             | NM_145443          | ref Mus musculus L-2-hydroxyglutarate dehydrogenase (L2hgdh), nuclear gene encoding mitochondrial protein, mRNA [NM_145443]                    | -0.24                 | 0.045   | 0.513           | -0.15                 | 0.026   | 0.971           | -0.32                | 0.005   | 0.154           |
| <b>2010015L04Rik</b>      | NM_177674          | ref Mus musculus RIKEN cDNA 2010015L04 gene (2010015L04Rik), transcript variant 1, mRNA [NM_177674]                                            | -0.25                 | 0.035   | 0.493           | -0.44                 | 0.005   | 0.621           | -0.34                | 0.043   | 0.429           |

Online Supplemental Table IV: All Three Overlap

| Gene Symbol               | RefSeq                    | Description                                                                                                                                    | logFC<br>mG4H-<br>STZ | P-value | Adj.<br>P-value | logFC<br>mG4H-<br>Veh | P-value | Adj.<br>P-value | logFC<br>Con-<br>STZ | P-value | Adj.<br>P-value |
|---------------------------|---------------------------|------------------------------------------------------------------------------------------------------------------------------------------------|-----------------------|---------|-----------------|-----------------------|---------|-----------------|----------------------|---------|-----------------|
| D2Wsu81e                  | NM_172660                 | ref Mus musculus DNA segment, Chr 2, Wayne State University 81, expressed (D2Wsu81e), transcript variant 2, mRNA [NM_172660]                   | -0.25                 | 0.015   | 0.419           | -0.16                 | 0.040   | 1.000           | -0.24                | 0.008   | 0.190           |
| Gcsh                      | NM_026572                 | ref Mus musculus glycine cleavage system protein H (aminomethyl carrier) (Gcsh), nuclear gene encoding mitochondrial protein, mRNA [NM_026572] | -0.25                 | 0.013   | 0.412           | -0.15                 | 0.036   | 1.000           | -0.23                | 0.014   | 0.250           |
| Gm7664                    | XM_981603                 | ref PREDICTED: Mus musculus predicted gene, EG665503, transcript variant 2 (EG665503), mRNA [XM_981603]                                        | -0.25                 | 0.015   | 0.421           | -0.15                 | 0.040   | 1.000           | -0.25                | 0.006   | 0.161           |
| 4933434E20Rik             | NM_027500                 | ref Mus musculus RIKEN cDNA 4933434E20 gene (4933434E20Rik), transcript variant 2, mRNA [NM_027500]                                            | -0.25                 | 0.016   | 0.426           | -0.19                 | 0.023   | 0.940           | -0.27                | 0.007   | 0.183           |
| Nprl2                     | NM_018879                 | ref Mus musculus nitrogen permease regulator-like 2 (S. cerevisiae) (Nprl2), mRNA [NM_018879]                                                  | -0.25                 | 0.021   | 0.449           | -0.15                 | 0.048   | 1.000           | -0.27                | 0.030   | 0.362           |
| Mrps27                    | NM_173757                 | ref Mus musculus mitochondrial ribosomal protein S27 (Mrps27), nuclear gene encoding mitochondrial protein, mRNA [NM_173757]                   | -0.25                 | 0.025   | 0.467           | -0.16                 | 0.050   | 1.000           | -0.31                | 0.002   | 0.093           |
| ENSMUST00000074662        | ENSMUST00000074662        | ens leucine rich repeat transmembrane neuronal 4 Gene [Source:MGI (curated);Acc:MGI:2389180] [ENSMUST00000074662]                              | -0.25                 | 0.040   | 0.504           | -0.17                 | 0.031   | 0.998           | -0.27                | 0.013   | 0.240           |
| 4933434E20Rik             | NM_025762                 | ref Mus musculus RIKEN cDNA 4933434E20 gene (4933434E20Rik), transcript variant 1, mRNA [NM_025762]                                            | -0.25                 | 0.010   | 0.403           | -0.18                 | 0.028   | 0.983           | -0.38                | 0.002   | 0.095           |
| BC004004                  | NM_030561                 | ref Mus musculus cDNA sequence BC004004 (BC004004), mRNA [NM_030561]                                                                           | -0.26                 | 0.021   | 0.449           | -0.24                 | 0.005   | 0.618           | -0.24                | 0.010   | 0.208           |
| DII4                      | NM_019454                 | ref Mus musculus delta-like 4 (Drosophila) (DII4), mRNA [NM_019454]                                                                            | -0.26                 | 0.045   | 0.513           | -0.21                 | 0.041   | 1.000           | -0.41                | 0.001   | 0.055           |
| Hibadh                    | NM_145567                 | ref Mus musculus 3-hydroxyisobutyrate dehydrogenase (Hibadh), mRNA [NM_145567]                                                                 | -0.26                 | 0.019   | 0.439           | -0.17                 | 0.044   | 1.000           | -0.28                | 0.018   | 0.284           |
| chr13:62117000-62164075_R | chr13:62117000-62164075_R | lincRNA:chr13:62117000-62164075 reverse strand                                                                                                 | -0.26                 | 0.017   | 0.429           | -0.21                 | 0.019   | 0.881           | -0.30                | 0.008   | 0.186           |
| Gm10436                   | NM_001105254              | ref Mus musculus predicted gene 10436 (Gm10436), mRNA [NM_001105254]                                                                           | -0.28                 | 0.048   | 0.517           | -0.33                 | 0.035   | 1.000           | -0.32                | 0.018   | 0.281           |
| Abcc8                     | NM_011510                 | ref Mus musculus ATP-binding cassette, sub-family C (CFTR/MRP), member 8 (Abcc8), mRNA [NM_011510]                                             | -0.28                 | 0.041   | 0.506           | -0.36                 | 0.002   | 0.409           | -0.33                | 0.019   | 0.293           |
| Ciao1                     | NM_025296                 | ref Mus musculus cytosolic iron-sulfur protein assembly 1 homolog (S. cerevisiae) (Ciao1), mRNA [NM_025296]                                    | -0.28                 | 0.033   | 0.490           | -0.15                 | 0.040   | 1.000           | -0.23                | 0.022   | 0.314           |
| G6pc3                     | NM_175935                 | ref Mus musculus glucose 6 phosphatase, catalytic, 3 (G6pc3), mRNA [NM_175935]                                                                 | -0.28                 | 0.004   | 0.336           | -0.14                 | 0.042   | 1.000           | -0.26                | 0.010   | 0.210           |

Online Supplemental Table IV: All Three Overlap

| Gene Symbol               | RefSeq                    | Description                                                                                                                               | logFC<br>mG4H-<br>STZ | P-value | Adj.<br>P-value | logFC<br>mG4H-<br>Veh | P-value | Adj.<br>P-value | logFC<br>Con-<br>STZ | P-value | Adj.<br>P-value |
|---------------------------|---------------------------|-------------------------------------------------------------------------------------------------------------------------------------------|-----------------------|---------|-----------------|-----------------------|---------|-----------------|----------------------|---------|-----------------|
| Hsd17b10                  | NM_016763                 | ref Mus musculus hydroxysteroid (17-beta) dehydrogenase 10 (Hsd17b10), nuclear gene encoding mitochondrial protein, mRNA [NM_016763]      | -0.28                 | 0.005   | 0.339           | -0.21                 | 0.007   | 0.663           | -0.32                | 0.003   | 0.111           |
| Hint2                     | NM_026871                 | ref Mus musculus histidine triad nucleotide binding protein 2 (Hint2), nuclear gene encoding mitochondrial protein, mRNA [NM_026871]      | -0.28                 | 0.016   | 0.426           | -0.19                 | 0.030   | 0.998           | -0.39                | 0.001   | 0.065           |
| Yars2                     | NM_198246                 | ref Mus musculus tyrosyl-tRNA synthetase 2 (mitochondrial) (Yars2), nuclear gene encoding mitochondrial protein, mRNA [NM_198246]         | -0.29                 | 0.012   | 0.408           | -0.16                 | 0.033   | 1.000           | -0.38                | 0.001   | 0.051           |
| Cdk2ap2                   | NM_026373                 | ref Mus musculus CDK2-associated protein 2 (Cdk2ap2), mRNA [NM_026373]                                                                    | -0.29                 | 0.018   | 0.435           | -0.22                 | 0.023   | 0.935           | -0.19                | 0.041   | 0.419           |
| Ctdspl                    | NM_133710                 | ref Mus musculus CTD (carboxy-terminal domain, RNA polymerase II, polypeptide A) small phosphatase-like (Ctdspl), mRNA [NM_133710]        | -0.29                 | 0.043   | 0.509           | -0.29                 | 0.004   | 0.563           | -0.25                | 0.010   | 0.208           |
| Stap2                     | NM_145934                 | ref Mus musculus signal transducing adaptor family member 2 (Stap2), mRNA [NM_145934]                                                     | -0.29                 | 0.021   | 0.450           | -0.20                 | 0.044   | 1.000           | -0.31                | 0.007   | 0.171           |
| chr13:74971657-75025450_R | chr13:74971657-75025450_R | lincRNA:chr13:74971657-75025450 reverse strand                                                                                            | -0.30                 | 0.036   | 0.495           | -0.34                 | 0.037   | 1.000           | -0.49                | 0.027   | 0.342           |
| Ctdspl                    | NM_133710                 | ref Mus musculus CTD (carboxy-terminal domain, RNA polymerase II, polypeptide A) small phosphatase-like (Ctdspl), mRNA [NM_133710]        | -0.30                 | 0.032   | 0.485           | -0.27                 | 0.009   | 0.731           | -0.22                | 0.027   | 0.345           |
| Msh2                      | NM_008628                 | ref Mus musculus mutS homolog 2 (E. coli) (Msh2), mRNA [NM_008628]                                                                        | -0.31                 | 0.006   | 0.356           | -0.22                 | 0.011   | 0.770           | -0.28                | 0.004   | 0.142           |
| Hes6                      | NM_019479                 | ref Mus musculus hairy and enhancer of split 6 (Drosophila) (Hes6), mRNA [NM_019479]                                                      | -0.31                 | 0.013   | 0.412           | -0.28                 | 0.007   | 0.686           | -0.43                | 0.000   | 0.043           |
| Pccb                      | NM_025835                 | ref Mus musculus propionyl Coenzyme A carboxylase, beta polypeptide (Pccb), nuclear gene encoding mitochondrial protein, mRNA [NM_025835] | -0.32                 | 0.021   | 0.449           | -0.28                 | 0.004   | 0.550           | -0.43                | 0.004   | 0.127           |
| Gm5617                    | NM_001004191              | ref Mus musculus predicted gene 5617 (Gm5617), mRNA [NM_001004191]                                                                        | -0.32                 | 0.037   | 0.497           | -0.21                 | 0.032   | 1.000           | -0.31                | 0.018   | 0.283           |
| Dach1                     | NM_007826                 | ref Mus musculus dachshund 1 (Drosophila) (Dach1), transcript variant 1, mRNA [NM_007826]                                                 | -0.32                 | 0.022   | 0.452           | -0.30                 | 0.005   | 0.589           | -0.44                | 0.002   | 0.094           |
| Ppa1                      | NM_026438                 | ref Mus musculus pyrophosphatase (inorganic) 1 (Ppa1), mRNA [NM_026438]                                                                   | -0.32                 | 0.003   | 0.308           | -0.17                 | 0.044   | 1.000           | -0.26                | 0.016   | 0.270           |
| Hrc                       | NM_010473                 | ref Mus musculus histidine rich calcium binding protein (Hrc), mRNA [NM_010473]                                                           | -0.32                 | 0.011   | 0.407           | -0.21                 | 0.030   | 0.998           | -0.40                | 0.002   | 0.103           |
| chr7:50833970-50850878_R  | chr7:50833970-50850878_R  | lincRNA:chr7:50833970-50850878 reverse strand                                                                                             | -0.32                 | 0.029   | 0.477           | -0.44                 | 0.016   | 0.851           | -0.36                | 0.017   | 0.279           |



Online Supplemental Table IV: All Three Overlap

| Gene Symbol               | RefSeq                    | Description                                                                                                                                               | logFC<br>mG4H-<br>STZ | P-value | Adj.<br>P-value | logFC<br>mG4H-<br>Veh | P-value | Adj.<br>P-value | logFC<br>Con-<br>STZ | P-value | Adj.<br>P-value |
|---------------------------|---------------------------|-----------------------------------------------------------------------------------------------------------------------------------------------------------|-----------------------|---------|-----------------|-----------------------|---------|-----------------|----------------------|---------|-----------------|
| Echs1                     | NM_053119                 | ref Mus musculus enoyl Coenzyme A hydratase, short chain, 1, mitochondrial (Echs1), nuclear gene encoding mitochondrial protein, mRNA [NM_053119]         | -0.33                 | 0.005   | 0.349           | -0.37                 | 0.000   | 0.080           | -0.28                | 0.007   | 0.173           |
| 2310046A06Rik             | NM_027150                 | ref Mus musculus RIKEN cDNA 2310046A06 gene (2310046A06Rik), mRNA [NM_027150]                                                                             | -0.33                 | 0.029   | 0.477           | -0.15                 | 0.042   | 1.000           | -0.27                | 0.010   | 0.209           |
| Gm4107                    | XM_001479448              | ref PREDICTED: Mus musculus hypothetical protein LOC100042916 (LOC100042916), mRNA [XM_001479448]                                                         | -0.33                 | 0.035   | 0.494           | -0.39                 | 0.007   | 0.664           | -0.46                | 0.019   | 0.290           |
| chr17:47022781-47023428_F | chr17:47022781-47023428_F | lincRNA:chr17:47022781-47023428 forward strand                                                                                                            | -0.34                 | 0.048   | 0.518           | -0.36                 | 0.027   | 0.981           | -0.29                | 0.028   | 0.348           |
| Acad11                    | NM_175324                 | ref Mus musculus acyl-Coenzyme A dehydrogenase family, member 11 (Acad11), mRNA [NM_175324]                                                               | -0.34                 | 0.013   | 0.412           | -0.22                 | 0.014   | 0.825           | -0.24                | 0.033   | 0.378           |
| Hhatl                     | NM_029095                 | ref Mus musculus hedgehog acyltransferase-like (Hhatl), transcript variant 1, mRNA [NM_029095]                                                            | -0.34                 | 0.010   | 0.400           | -0.23                 | 0.005   | 0.583           | -0.20                | 0.028   | 0.348           |
| Plau                      | NM_008873                 | ref Mus musculus plasminogen activator, urokinase (Plau), mRNA [NM_008873]                                                                                | -0.34                 | 0.036   | 0.495           | -0.23                 | 0.043   | 1.000           | -0.37                | 0.011   | 0.219           |
| Mns1                      | NM_008613                 | ref Mus musculus meiosis-specific nuclear structural protein 1 (Mns1), mRNA [NM_008613]                                                                   | -0.34                 | 0.009   | 0.393           | -0.32                 | 0.000   | 0.108           | -0.28                | 0.004   | 0.137           |
| Cpeb3                     | NM_198300                 | ref Mus musculus cytoplasmic polyadenylation element binding protein 3 (Cpeb3), mRNA [NM_198300]                                                          | -0.34                 | 0.005   | 0.349           | -0.19                 | 0.017   | 0.860           | -0.40                | 0.005   | 0.145           |
| Dach1                     | NM_007826                 | ref Mus musculus dachshund 1 (Drosophila) (Dach1), transcript variant 1, mRNA [NM_007826]                                                                 | -0.34                 | 0.026   | 0.471           | -0.30                 | 0.011   | 0.766           | -0.37                | 0.008   | 0.194           |
| chr14:26973425-26986650_R | chr14:26973425-26986650_R | lincRNA:chr14:26973425-26986650 reverse strand                                                                                                            | -0.34                 | 0.031   | 0.480           | -0.35                 | 0.014   | 0.820           | -0.39                | 0.008   | 0.192           |
| ENSMUST00000112652        | ENSMUST00000112652        | gb Mus musculus 16 days neonate heart cDNA, RIKEN full-length enriched library, clone:D830032D10 product:unclassifiable, full insert sequence. [AK085942] | -0.35                 | 0.021   | 0.448           | -0.42                 | 0.005   | 0.621           | -0.32                | 0.035   | 0.388           |
| Eral1                     | NM_022313                 | ref Mus musculus Era (G-protein)-like 1 (E. coli) (Eral1), mRNA [NM_022313]                                                                               | -0.35                 | 0.001   | 0.234           | -0.19                 | 0.022   | 0.919           | -0.42                | 0.000   | 0.032           |
| LOC100046684              | XM_001474477              | ref PREDICTED: Mus musculus similar to es1 protein, transcript variant 1 (LOC100046684), mRNA [XM_001474477]                                              | -0.35                 | 0.008   | 0.392           | -0.20                 | 0.022   | 0.928           | -0.34                | 0.003   | 0.118           |
| Ttc38                     | NM_001033337              | ref Mus musculus tetratricopeptide repeat domain 38 (Ttc38), mRNA [NM_001033337]                                                                          | -0.35                 | 0.020   | 0.442           | -0.33                 | 0.001   | 0.263           | -0.48                | 0.012   | 0.236           |
| Cacnb1                    | NM_031173                 | ref Mus musculus calcium channel, voltage-dependent, beta 1 subunit (Cacnb1), transcript variant 1, mRNA [NM_031173]                                      | -0.36                 | 0.015   | 0.418           | -0.35                 | 0.012   | 0.787           | -0.35                | 0.014   | 0.253           |

Online Supplemental Table IV: All Three Overlap

| Gene Symbol               | RefSeq                    | Description                                                                                                                                                                                                   | logFC<br>mG4H-<br>STZ | P-value | Adj.<br>P-value | logFC<br>mG4H-<br>Veh | P-value | Adj.<br>P-value | logFC<br>Con-<br>STZ | P-value | Adj.<br>P-value |
|---------------------------|---------------------------|---------------------------------------------------------------------------------------------------------------------------------------------------------------------------------------------------------------|-----------------------|---------|-----------------|-----------------------|---------|-----------------|----------------------|---------|-----------------|
| Akr7a5                    | NM_025337                 | ref Mus musculus aldo-keto reductase family 7, member A5 (aflatoxin aldehyde reductase) (Akr7a5), mRNA [NM_025337]                                                                                            | -0.36                 | 0.009   | 0.400           | -0.15                 | 0.042   | 1.000           | -0.32                | 0.009   | 0.204           |
| Bckdha                    | NM_007533                 | ref Mus musculus branched chain ketoacid dehydrogenase E1, alpha polypeptide (Bckdha), nuclear gene encoding mitochondrial protein, mRNA [NM_007533]                                                          | -0.37                 | 0.014   | 0.416           | -0.32                 | 0.015   | 0.840           | -0.36                | 0.022   | 0.311           |
| Hspe1                     | NM_008303                 | ref Mus musculus heat shock protein 1 (chaperonin 10) (Hspe1), mRNA [NM_008303]                                                                                                                               | -0.37                 | 0.018   | 0.435           | -0.19                 | 0.018   | 0.863           | -0.32                | 0.006   | 0.157           |
| Brp44l                    | NM_018819                 | ref Mus musculus brain protein 44-like (Brp44l), mRNA [NM_018819]                                                                                                                                             | -0.37                 | 0.004   | 0.312           | -0.25                 | 0.005   | 0.598           | -0.40                | 0.000   | 0.029           |
| Rmnd1                     | NM_025343                 | ref Mus musculus required for meiotic nuclear division 1 homolog (S. cerevisiae) (Rmnd1), mRNA [NM_025343]                                                                                                    | -0.37                 | 0.020   | 0.443           | -0.23                 | 0.032   | 1.000           | -0.38                | 0.005   | 0.154           |
| Arl6                      | NM_019665                 | ref Mus musculus ADP-ribosylation factor-like 6 (Arl6), mRNA [NM_019665]                                                                                                                                      | -0.37                 | 0.001   | 0.246           | -0.17                 | 0.019   | 0.881           | -0.32                | 0.005   | 0.156           |
| Ugp2                      | NM_139297                 | ref Mus musculus UDP-glucose pyrophosphorylase 2 (Ugp2), mRNA [NM_139297]                                                                                                                                     | -0.37                 | 0.006   | 0.361           | -0.24                 | 0.003   | 0.471           | -0.29                | 0.010   | 0.208           |
| Ostm1                     | NM_172416                 | ref Mus musculus osteopetrosis associated transmembrane protein 1 (Ostm1), mRNA [NM_172416]                                                                                                                   | -0.37                 | 0.002   | 0.266           | -0.28                 | 0.011   | 0.773           | -0.39                | 0.003   | 0.106           |
| Jam2                      | ENSMUST00000114195        | ensljunction adhesion molecule 2 Gene [Source:MGI (curated);Acc:MGI:1933820] [ENSMUST00000114195]                                                                                                             | -0.37                 | 0.007   | 0.382           | -0.27                 | 0.003   | 0.508           | -0.32                | 0.006   | 0.170           |
| chr18:61783548-61783935_F | chr18:61783548-61783935_F | lincRNA:chr18:61783548-61783935 forward strand                                                                                                                                                                | -0.38                 | 0.028   | 0.474           | -0.85                 | 0.020   | 0.885           | -0.32                | 0.019   | 0.291           |
| Dynll2                    | NM_026556                 | ref Mus musculus dynein light chain LC8-type 2 (Dynll2), transcript variant 1, mRNA [NM_026556]                                                                                                               | -0.38                 | 0.001   | 0.197           | -0.17                 | 0.026   | 0.973           | -0.50                | 0.000   | 0.014           |
| 1810027O10Rik             | NM_026982                 | ref Mus musculus RIKEN cDNA 1810027O10 gene (1810027O10Rik), mRNA [NM_026982]                                                                                                                                 | -0.38                 | 0.002   | 0.262           | -0.21                 | 0.026   | 0.974           | -0.32                | 0.008   | 0.195           |
| Nmnat3                    | NM_144533                 | ref Mus musculus nicotinamide nucleotide adenyltransferase 3 (Nmnat3), mRNA [NM_144533]                                                                                                                       | -0.38                 | 0.002   | 0.281           | -0.20                 | 0.038   | 1.000           | -0.40                | 0.005   | 0.146           |
| Slc25a13                  | NM_015829                 | ref Mus musculus solute carrier family 25 (mitochondrial carrier, adenine nucleotide translocator), member 13 (Slc25a13), nuclear gene encoding mitochondrial protein, transcript variant 1, mRNA [NM_015829] | -0.38                 | 0.012   | 0.408           | -0.23                 | 0.029   | 0.986           | -0.57                | 0.000   | 0.031           |
| Acadsb                    | NM_025826                 | ref Mus musculus acyl-Coenzyme A dehydrogenase, short/branched chain (Acadsb), nuclear gene encoding mitochondrial protein, mRNA [NM_025826]                                                                  | -0.38                 | 0.028   | 0.474           | -0.59                 | 0.000   | 0.012           | -0.30                | 0.026   | 0.340           |
| Arhgap28                  | NM_172964                 | ref Mus musculus Rho GTPase activating protein 28 (Arhgap28), mRNA [NM_172964]                                                                                                                                | -0.39                 | 0.040   | 0.504           | -0.19                 | 0.010   | 0.750           | -0.36                | 0.024   | 0.324           |
| Smpd1                     | NM_011421                 | ref Mus musculus sphingomyelin phosphodiesterase 1, acid lysosomal (Smpd1), mRNA [NM_011421]                                                                                                                  | -0.39                 | 0.000   | 0.160           | -0.26                 | 0.003   | 0.471           | -0.39                | 0.000   | 0.045           |

Online Supplemental Table IV: All Three Overlap

| Gene Symbol                      | RefSeq                    | Description                                                                                                                              | logFC<br>mG4H-<br>STZ | P-value | Adj.<br>P-value | logFC<br>mG4H-<br>Veh | P-value | Adj.<br>P-value | logFC<br>Con-<br>STZ | P-value | Adj.<br>P-value |
|----------------------------------|---------------------------|------------------------------------------------------------------------------------------------------------------------------------------|-----------------------|---------|-----------------|-----------------------|---------|-----------------|----------------------|---------|-----------------|
| <b>Ppyr1</b>                     | ENSMUST000000052164       | ens pancreatic polypeptide receptor 1 Gene [Source:MGI Symbol;Acc:MGI:105374] [ENSMUST000000052164]                                      | -0.39                 | 0.017   | 0.432           | -0.42                 | 0.007   | 0.674           | -0.36                | 0.016   | 0.272           |
| <b>Mccc1</b>                     | NM_023644                 | ref Mus musculus methylcrotonoyl-Coenzyme A carboxylase 1 (alpha) (Mccc1), nuclear gene encoding mitochondrial protein, mRNA [NM_023644] | -0.39                 | 0.021   | 0.448           | -0.35                 | 0.004   | 0.513           | -0.25                | 0.044   | 0.432           |
| <b>Yif1b</b>                     | NM_029887                 | ref Mus musculus Yip1 interacting factor homolog B (S. cerevisiae) (Yif1b), transcript variant 1, mRNA [NM_029887]                       | -0.39                 | 0.003   | 0.281           | -0.20                 | 0.038   | 1.000           | -0.26                | 0.023   | 0.317           |
| <b>LOC100038980</b>              | XM_001472087              | ref PREDICTED: Mus musculus hypothetical protein LOC100038980 (LOC100038980), mRNA [XM_001472087]                                        | -0.39                 | 0.016   | 0.426           | -0.30                 | 0.001   | 0.263           | -0.27                | 0.006   | 0.168           |
| <b>Cd320</b>                     | NM_019421                 | ref Mus musculus CD320 antigen (Cd320), mRNA [NM_019421]                                                                                 | -0.39                 | 0.002   | 0.262           | -0.41                 | 0.001   | 0.214           | -0.35                | 0.004   | 0.133           |
| <b>Kank2</b>                     | NM_145611                 | ref Mus musculus KN motif and ankyrin repeat domains 2 (Kank2), mRNA [NM_145611]                                                         | -0.39                 | 0.003   | 0.281           | -0.20                 | 0.029   | 0.986           | -0.48                | 0.007   | 0.179           |
| <b>Syt7</b>                      | NM_173068                 | ref Mus musculus synaptotagmin VII (Syt7), transcript variant 3, mRNA [NM_173068]                                                        | -0.39                 | 0.022   | 0.452           | -0.38                 | 0.041   | 1.000           | -0.60                | 0.027   | 0.343           |
| <b>C330016O10Rik</b>             | NM_145974                 | ref Mus musculus RIKEN cDNA C330016O10 gene (C330016O10Rik), mRNA [NM_145974]                                                            | -0.39                 | 0.014   | 0.417           | -0.31                 | 0.002   | 0.343           | -0.24                | 0.026   | 0.341           |
| <b>Slc37a2</b>                   | NM_020258                 | ref Mus musculus solute carrier family 37 (glycerol-3-phosphate transporter), member 2 (Slc37a2), transcript variant 2, mRNA [NM_020258] | -0.40                 | 0.006   | 0.365           | -0.31                 | 0.007   | 0.675           | -0.50                | 0.001   | 0.053           |
| <b>Acy3</b>                      | NM_027857                 | ref Mus musculus aspartoacylase (aminoacylase) 3 (Acy3), mRNA [NM_027857]                                                                | -0.40                 | 0.003   | 0.290           | -0.25                 | 0.026   | 0.971           | -0.34                | 0.019   | 0.294           |
| <b>Mapkapk5</b>                  | NM_010765                 | ref Mus musculus MAP kinase-activated protein kinase 5 (Mapkapk5), mRNA [NM_010765]                                                      | -0.40                 | 0.001   | 0.242           | -0.19                 | 0.030   | 0.998           | -0.40                | 0.001   | 0.053           |
| <b>Shd</b>                       | NM_009168                 | ref Mus musculus src homology 2 domain-containing transforming protein D (Shd), transcript variant 2, mRNA [NM_009168]                   | -0.40                 | 0.003   | 0.281           | -0.28                 | 0.014   | 0.812           | -0.41                | 0.001   | 0.060           |
| <b>Wdr18</b>                     | NM_175450                 | ref Mus musculus WD repeat domain 18 (Wdr18), mRNA [NM_175450]                                                                           | -0.40                 | 0.002   | 0.281           | -0.25                 | 0.003   | 0.488           | -0.43                | 0.000   | 0.041           |
| <b>Ethe1</b>                     | NM_023154                 | ref Mus musculus ethylmalonic encephalopathy 1 (Ethe1), nuclear gene encoding mitochondrial protein, mRNA [NM_023154]                    | -0.40                 | 0.001   | 0.234           | -0.22                 | 0.022   | 0.933           | -0.39                | 0.001   | 0.070           |
| <b>Sypl2</b>                     | NM_008596                 | ref Mus musculus synaptophysin-like 2 (Sypl2), mRNA [NM_008596]                                                                          | -0.40                 | 0.015   | 0.418           | -0.42                 | 0.019   | 0.883           | -0.55                | 0.006   | 0.167           |
| <b>chr15:96984422-97000322_F</b> | chr15:96984422-97000322_F | lincRNA:chr15:96984422-97000322 forward strand                                                                                           | -0.40                 | 0.050   | 0.520           | -0.40                 | 0.032   | 1.000           | -0.41                | 0.005   | 0.154           |

Online Supplemental Table IV: All Three Overlap

| Gene Symbol                | RefSeq                     | Description                                                                                                                              | logFC<br>mG4H-<br>STZ | P-value | Adj.<br>P-value | logFC<br>mG4H-<br>Veh | P-value | Adj.<br>P-value | logFC<br>Con-<br>STZ | P-value | Adj.<br>P-value |
|----------------------------|----------------------------|------------------------------------------------------------------------------------------------------------------------------------------|-----------------------|---------|-----------------|-----------------------|---------|-----------------|----------------------|---------|-----------------|
| Pgam2                      | NM_018870                  | ref Mus musculus phosphoglycerate mutase 2 (Pgam2), mRNA [NM_018870]                                                                     | -0.41                 | 0.007   | 0.384           | -0.18                 | 0.016   | 0.851           | -0.29                | 0.011   | 0.218           |
| Yipf7                      | NM_023784                  | ref Mus musculus Yip1 domain family, member 7 (Yipf7), mRNA [NM_023784]                                                                  | -0.41                 | 0.011   | 0.407           | -0.19                 | 0.023   | 0.943           | -0.28                | 0.027   | 0.347           |
| C1qtnf9                    | NM_183175                  | ref Mus musculus C1q and tumor necrosis factor related protein 9 (C1qtnf9), mRNA [NM_183175]                                             | -0.41                 | 0.034   | 0.493           | -0.24                 | 0.006   | 0.636           | -0.47                | 0.003   | 0.117           |
| Fat2                       | NM_001029988               | ref Mus musculus FAT tumor suppressor homolog 2 (Drosophila) (Fat2), mRNA [NM_001029988]                                                 | -0.41                 | 0.001   | 0.227           | -0.27                 | 0.003   | 0.457           | -0.43                | 0.000   | 0.035           |
| ENSMUST00000087066         | ENSMUST00000087066         | ens ectonucleotide pyrophosphatase/phosphodiesterase 5 Gene [Source:MGI (curated);Acc:MGI:1933830] [ENSMUST00000087066]                  | -0.41                 | 0.004   | 0.312           | -0.28                 | 0.004   | 0.532           | -0.35                | 0.006   | 0.162           |
| Jam2                       | NM_023844                  | ref Mus musculus junction adhesion molecule 2 (Jam2), mRNA [NM_023844]                                                                   | -0.42                 | 0.002   | 0.257           | -0.42                 | 0.000   | 0.192           | -0.33                | 0.003   | 0.107           |
| Pcca                       | NM_144844                  | ref Mus musculus propionyl-Coenzyme A carboxylase, alpha polypeptide (Pcca), mRNA [NM_144844]                                            | -0.42                 | 0.003   | 0.286           | -0.35                 | 0.001   | 0.309           | -0.40                | 0.003   | 0.116           |
| chrX:120300373-120302404_F | chrX:120300373-120302404_F | lincRNA:chrX:120300373-120302404 forward strand                                                                                          | -0.42                 | 0.021   | 0.448           | -0.27                 | 0.022   | 0.935           | -0.33                | 0.016   | 0.269           |
| Lipg                       | NM_010720                  | ref Mus musculus lipase, endothelial (Lipg), mRNA [NM_010720]                                                                            | -0.42                 | 0.013   | 0.412           | -0.50                 | 0.004   | 0.535           | -0.63                | 0.013   | 0.242           |
| chr18:90750100-90772025_F  | chr18:90750100-90772025_F  | lincRNA:chr18:90750100-90772025 forward strand                                                                                           | -0.42                 | 0.014   | 0.412           | -0.44                 | 0.002   | 0.343           | -0.41                | 0.015   | 0.261           |
| Mccc1                      | NM_023644                  | ref Mus musculus methylcrotonoyl-Coenzyme A carboxylase 1 (alpha) (Mccc1), nuclear gene encoding mitochondrial protein, mRNA [NM_023644] | -0.42                 | 0.004   | 0.312           | -0.35                 | 0.001   | 0.256           | -0.30                | 0.007   | 0.182           |
| ENSMUST00000078094         | ENSMUST00000078094         | ens transmembrane protein 116 Gene [Source:MGI (curated);Acc:MGI:1924712] [ENSMUST00000078094]                                           | -0.42                 | 0.009   | 0.397           | -0.26                 | 0.034   | 1.000           | -0.32                | 0.016   | 0.272           |
| Ldhd                       | NM_027570                  | ref Mus musculus lactate dehydrogenase D (Ldhd), nuclear gene encoding mitochondrial protein, mRNA [NM_027570]                           | -0.42                 | 0.046   | 0.513           | -0.21                 | 0.044   | 1.000           | -0.46                | 0.011   | 0.223           |
| Fdxr                       | NM_007997                  | ref Mus musculus ferredoxin reductase (Fdxr), nuclear gene encoding mitochondrial protein, mRNA [NM_007997]                              | -0.43                 | 0.001   | 0.213           | -0.31                 | 0.008   | 0.708           | -0.27                | 0.048   | 0.450           |
| 4732415M23Rik              | NM_177279                  | ref Mus musculus RIKEN cDNA 4732415M23 gene (4732415M23Rik), mRNA [NM_177279]                                                            | -0.43                 | 0.008   | 0.390           | -0.25                 | 0.011   | 0.770           | -0.48                | 0.005   | 0.154           |
| Pxmp2                      | NM_008993                  | ref Mus musculus peroxisomal membrane protein 2 (Pxmp2), mRNA [NM_008993]                                                                | -0.43                 | 0.002   | 0.272           | -0.47                 | 0.000   | 0.080           | -0.47                | 0.002   | 0.099           |
| Avpr1a                     | NM_016847                  | ref Mus musculus arginine vasopressin receptor 1A (Avpr1a), mRNA [NM_016847]                                                             | -0.43                 | 0.028   | 0.476           | -0.18                 | 0.034   | 1.000           | -0.51                | 0.015   | 0.263           |
| Mpnd                       | NM_026530                  | ref Mus musculus MPN domain containing (Mpnd), mRNA [NM_026530]                                                                          | -0.43                 | 0.000   | 0.153           | -0.35                 | 0.000   | 0.118           | -0.32                | 0.001   | 0.059           |

Online Supplemental Table IV: All Three Overlap

| Gene Symbol            | RefSeq       | Description                                                                                                                             | logFC<br>mG4H-<br>STZ | P-value | Adj.<br>P-value | logFC<br>mG4H-<br>Veh | P-value | Adj.<br>P-value | logFC<br>Con-<br>STZ | P-value | Adj.<br>P-value |
|------------------------|--------------|-----------------------------------------------------------------------------------------------------------------------------------------|-----------------------|---------|-----------------|-----------------------|---------|-----------------|----------------------|---------|-----------------|
| <b>Tnfsf12-Tnfsf13</b> | NM_001034097 | ref Mus musculus Tnfsf12-tnfsf13 readthrough transcript (Tnfsf12-Tnfsf13), transcript variant 1, mRNA [NM_001034097]                    | -0.44                 | 0.001   | 0.163           | -0.28                 | 0.001   | 0.275           | -0.81                | 0.043   | 0.426           |
| <b>Prr15l</b>          | NM_146026    | ref Mus musculus proline rich 15-like (Prr15l), mRNA [NM_146026]                                                                        | -0.44                 | 0.032   | 0.484           | -0.50                 | 0.019   | 0.881           | -0.55                | 0.007   | 0.171           |
| <b>Slc2a4</b>          | NM_009204    | ref Mus musculus solute carrier family 2 (facilitated glucose transporter), member 4 (Slc2a4), mRNA [NM_009204]                         | -0.44                 | 0.009   | 0.394           | -0.23                 | 0.010   | 0.762           | -0.67                | 0.000   | 0.018           |
| <b>Gstm6</b>           | NM_008184    | ref Mus musculus glutathione S-transferase, mu 6 (Gstm6), mRNA [NM_008184]                                                              | -0.45                 | 0.006   | 0.366           | -0.62                 | 0.001   | 0.259           | -0.37                | 0.010   | 0.214           |
| <b>XM_001480127</b>    | XM_001480127 | ref PREDICTED: Mus musculus hypothetical protein LOC100043421 (LOC100043421), mRNA [XM_001480127]                                       | -0.45                 | 0.029   | 0.477           | -0.38                 | 0.018   | 0.868           | -0.35                | 0.026   | 0.336           |
| <b>Gm1631</b>          | NM_201366    | ref Mus musculus predicted gene 1631 (Gm1631), mRNA [NM_201366]                                                                         | -0.45                 | 0.040   | 0.504           | -0.35                 | 0.022   | 0.926           | -0.39                | 0.022   | 0.310           |
| <b>Tcea3</b>           | NM_011542    | ref Mus musculus transcription elongation factor A (SII), 3 (Tcea3), mRNA [NM_011542]                                                   | -0.45                 | 0.015   | 0.419           | -0.30                 | 0.026   | 0.973           | -0.54                | 0.009   | 0.199           |
| <b>Ppara</b>           | NM_011144    | ref Mus musculus peroxisome proliferator activated receptor alpha (Ppara), transcript variant 1, mRNA [NM_011144]                       | -0.45                 | 0.039   | 0.499           | -0.21                 | 0.043   | 1.000           | -0.32                | 0.013   | 0.242           |
| <b>Stmn1</b>           | NM_019641    | ref Mus musculus stathmin 1 (Stmn1), mRNA [NM_019641]                                                                                   | -0.45                 | 0.013   | 0.412           | -0.30                 | 0.005   | 0.621           | -0.48                | 0.001   | 0.052           |
| <b>Stmn1-rs2</b>       | XR_034760    | ref PREDICTED: Mus musculus similar to Stathmin 1/oncoprotein 18 (LOC623112), misc RNA [XR_034760]                                      | -0.45                 | 0.009   | 0.394           | -0.30                 | 0.006   | 0.661           | -0.50                | 0.000   | 0.043           |
| <b>Plxnb1</b>          | NM_172775    | ref Mus musculus plexin B1 (Plxnb1), mRNA [NM_172775]                                                                                   | -0.46                 | 0.007   | 0.375           | -0.21                 | 0.044   | 1.000           | -0.64                | 0.000   | 0.030           |
| <b>Mccc2</b>           | NM_030026    | ref Mus musculus methylcrotonoyl-Coenzyme A carboxylase 2 (beta) (Mccc2), nuclear gene encoding mitochondrial protein, mRNA [NM_030026] | -0.46                 | 0.018   | 0.437           | -0.31                 | 0.014   | 0.825           | -0.48                | 0.009   | 0.200           |
| <b>Ttc38</b>           | NM_001033337 | ref Mus musculus tetratricopeptide repeat domain 38 (Ttc38), mRNA [NM_001033337]                                                        | -0.46                 | 0.006   | 0.369           | -0.41                 | 0.001   | 0.275           | -0.37                | 0.005   | 0.145           |
| <b>Mut</b>             | NM_008650    | ref Mus musculus methylmalonyl-Coenzyme A mutase (Mut), nuclear gene encoding mitochondrial protein, mRNA [NM_008650]                   | -0.46                 | 0.001   | 0.231           | -0.35                 | 0.001   | 0.237           | -0.35                | 0.003   | 0.107           |
| <b>Cd28</b>            | NM_007642    | ref Mus musculus CD28 antigen (Cd28), mRNA [NM_007642]                                                                                  | -0.46                 | 0.006   | 0.356           | -0.40                 | 0.002   | 0.391           | -0.44                | 0.006   | 0.162           |
| <b>Sort1</b>           | NM_019972    | ref Mus musculus sortilin 1 (Sort1), mRNA [NM_019972]                                                                                   | -0.46                 | 0.008   | 0.391           | -0.40                 | 0.015   | 0.840           | -0.57                | 0.000   | 0.042           |
| <b>Sept4</b>           | NM_011129    | ref Mus musculus septin 4 (Sept4), mRNA [NM_011129]                                                                                     | -0.46                 | 0.013   | 0.412           | -0.19                 | 0.022   | 0.922           | -0.48                | 0.004   | 0.135           |

Online Supplemental Table IV: All Three Overlap

| Gene Symbol          | RefSeq       | Description                                                                                                                                              | logFC<br>mG4H-<br>STZ | P-value | Adj.<br>P-value | logFC<br>mG4H-<br>Veh | P-value | Adj.<br>P-value | logFC<br>Con-<br>STZ | P-value | Adj.<br>P-value |
|----------------------|--------------|----------------------------------------------------------------------------------------------------------------------------------------------------------|-----------------------|---------|-----------------|-----------------------|---------|-----------------|----------------------|---------|-----------------|
| <b>Rab37</b>         | NM_001163753 | ref Mus musculus RAB37, member of RAS oncogene family (Rab37), transcript variant 2, mRNA [NM_001163753]                                                 | -0.46                 | 0.007   | 0.384           | -0.17                 | 0.048   | 1.000           | -0.46                | 0.015   | 0.266           |
| <b>4931440J10Rik</b> | AK028863     | gb Mus musculus 10 days neonate skin cDNA, RIKEN full-length enriched library, clone:4732464K16 product:unclassifiable, full insert sequence. [AK028863] | -0.46                 | 0.029   | 0.477           | -0.22                 | 0.009   | 0.720           | -0.42                | 0.000   | 0.045           |
| <b>Pfkfb4</b>        | NM_173019    | ref Mus musculus 6-phosphofructo-2-kinase/fructose-2,6-biphosphatase 4 (Pfkfb4), mRNA [NM_173019]                                                        | -0.47                 | 0.001   | 0.248           | -0.26                 | 0.003   | 0.488           | -0.48                | 0.002   | 0.099           |
| <b>LOC674373</b>     | XR_031198    | ref PREDICTED: Mus musculus similar to elongation initiation factor 4E (LOC674373), misc RNA [XR_031198]                                                 | -0.47                 | 0.016   | 0.428           | -0.26                 | 0.032   | 1.000           | -0.53                | 0.026   | 0.341           |
| <b>Eif4e</b>         | NM_007917    | ref Mus musculus eukaryotic translation initiation factor 4E (Eif4e), mRNA [NM_007917]                                                                   | -0.47                 | 0.020   | 0.441           | -0.25                 | 0.018   | 0.864           | -0.38                | 0.041   | 0.421           |
| <b>Slc25a38</b>      | NM_144793    | ref Mus musculus solute carrier family 25, member 38 (Slc25a38), nuclear gene encoding mitochondrial protein, mRNA [NM_144793]                           | -0.48                 | 0.004   | 0.308           | -0.37                 | 0.000   | 0.172           | -0.52                | 0.000   | 0.025           |
| <b>Cacna2d3</b>      | NM_009785    | ref Mus musculus calcium channel, voltage-dependent, alpha2/delta subunit 3 (Cacna2d3), mRNA [NM_009785]                                                 | -0.48                 | 0.021   | 0.447           | -0.38                 | 0.028   | 0.984           | -0.50                | 0.005   | 0.150           |
| <b>Zmat4</b>         | NM_177086    | ref Mus musculus zinc finger, matrin type 4 (Zmat4), mRNA [NM_177086]                                                                                    | -0.48                 | 0.001   | 0.248           | -0.40                 | 0.009   | 0.736           | -0.40                | 0.042   | 0.425           |
| <b>Pyroxd2</b>       | NM_029011    | ref Mus musculus pyridine nucleotide-disulphide oxidoreductase domain 2 (Pyroxd2), mRNA [NM_029011]                                                      | -0.48                 | 0.002   | 0.279           | -0.33                 | 0.006   | 0.628           | -0.28                | 0.028   | 0.352           |
| <b>Mrgprx1</b>       | NM_207540    | ref Mus musculus MAS-related GPR, member X1 (Mrgprx1), mRNA [NM_207540]                                                                                  | -0.48                 | 0.006   | 0.369           | -0.57                 | 0.012   | 0.786           | -0.38                | 0.012   | 0.232           |
| <b>Stk39</b>         | NM_016866    | ref Mus musculus serine/threonine kinase 39, STE20/SPS1 homolog (yeast) (Stk39), mRNA [NM_016866]                                                        | -0.48                 | 0.003   | 0.303           | -0.35                 | 0.007   | 0.672           | -0.57                | 0.004   | 0.126           |
| <b>LOC632707</b>     | XR_031558    | ref PREDICTED: Mus musculus similar to heterogeneous nuclear ribonucleoprotein A3 (LOC632707), misc RNA [XR_031558]                                      | -0.48                 | 0.029   | 0.477           | -0.48                 | 0.018   | 0.878           | -0.43                | 0.012   | 0.234           |
| <b>Cdk5r1</b>        | NM_009871    | ref Mus musculus cyclin-dependent kinase 5, regulatory subunit 1 (p35) (Cdk5r1), mRNA [NM_009871]                                                        | -0.49                 | 0.001   | 0.246           | -0.31                 | 0.029   | 0.986           | -0.54                | 0.001   | 0.059           |
| <b>Gm2252</b>        | XM_001472980 | ref PREDICTED: Mus musculus hypothetical protein LOC100039465 (LOC100039465), mRNA [XM_001472980]                                                        | -0.49                 | 0.012   | 0.408           | -0.44                 | 0.011   | 0.777           | -0.85                | 0.000   | 0.012           |
| <b>Yif1b</b>         | NM_029887    | ref Mus musculus Yip1 interacting factor homolog B (S. cerevisiae) (Yif1b), transcript variant 1, mRNA [NM_029887]                                       | -0.49                 | 0.002   | 0.279           | -0.20                 | 0.013   | 0.808           | -0.29                | 0.014   | 0.259           |
| <b>Lrrc30</b>        | NM_001033340 | ref Mus musculus leucine rich repeat containing 30 (Lrrc30), mRNA [NM_001033340]                                                                         | -0.49                 | 0.002   | 0.264           | -0.39                 | 0.037   | 1.000           | -0.69                | 0.000   | 0.031           |

Online Supplemental Table IV: All Three Overlap

| Gene Symbol                       | RefSeq                     | Description                                                                                                                                                 | logFC<br>mG4H-<br>STZ | P-value | Adj.<br>P-value | logFC<br>mG4H-<br>Veh | P-value | Adj.<br>P-value | logFC<br>Con-<br>STZ | P-value | Adj.<br>P-value |
|-----------------------------------|----------------------------|-------------------------------------------------------------------------------------------------------------------------------------------------------------|-----------------------|---------|-----------------|-----------------------|---------|-----------------|----------------------|---------|-----------------|
| <b>Ttc38</b>                      | NM_001033337               | ref Mus musculus tetratricopeptide repeat domain 38 (Ttc38), mRNA [NM_001033337]                                                                            | -0.50                 | 0.002   | 0.262           | -0.42                 | 0.000   | 0.145           | -0.40                | 0.007   | 0.176           |
| <b>Rnft2</b>                      | NM_172998                  | ref Mus musculus ring finger protein, transmembrane 2 (Rnft2), transcript variant 1, mRNA [NM_172998]                                                       | -0.50                 | 0.005   | 0.349           | -0.27                 | 0.016   | 0.843           | -0.63                | 0.004   | 0.130           |
| <b>Dcxr</b>                       | NM_026428                  | ref Mus musculus dicarbonyl L-xylulose reductase (Dcxr), mRNA [NM_026428]                                                                                   | -0.50                 | 0.005   | 0.355           | -0.71                 | 0.000   | 0.044           | -0.45                | 0.001   | 0.075           |
| <b>Gbp2</b>                       | NM_010260                  | ref Mus musculus guanylate binding protein 2 (Gbp2), mRNA [NM_010260]                                                                                       | -0.50                 | 0.021   | 0.448           | -0.18                 | 0.043   | 1.000           | -0.30                | 0.014   | 0.253           |
| <b>Cpne4</b>                      | NM_028719                  | ref Mus musculus copine IV (Cpne4), mRNA [NM_028719]                                                                                                        | -0.50                 | 0.001   | 0.183           | -0.60                 | 0.001   | 0.214           | -0.69                | 0.000   | 0.027           |
| <b>Tmod4</b>                      | NM_016712                  | ref Mus musculus tropomodulin 4 (Tmod4), mRNA [NM_016712]                                                                                                   | -0.50                 | 0.002   | 0.279           | -0.40                 | 0.026   | 0.971           | -0.54                | 0.003   | 0.116           |
| <b>Kif26b</b>                     | NM_001161665               | ref Mus musculus kinesin family member 26B (Kif26b), mRNA [NM_001161665]                                                                                    | -0.50                 | 0.002   | 0.275           | -0.62                 | 0.001   | 0.256           | -0.48                | 0.008   | 0.184           |
| <b>Snrnp25</b>                    | NM_030093                  | ref Mus musculus small nuclear ribonucleoprotein 25 (U11/U12) (Snrnp25), mRNA [NM_030093]                                                                   | -0.51                 | 0.000   | 0.090           | -0.16                 | 0.047   | 1.000           | -0.66                | 0.000   | 0.002           |
| <b>Nrg4</b>                       | NM_032002                  | ref Mus musculus neuregulin 4 (Nrg4), mRNA [NM_032002]                                                                                                      | -0.51                 | 0.016   | 0.425           | -0.31                 | 0.046   | 1.000           | -0.45                | 0.005   | 0.150           |
| <b>chr7:4828654-4843713_F</b>     | chr7:4828654-4843713_F     | lincRNA:chr7:4828654-4843713 forward strand                                                                                                                 | -0.51                 | 0.001   | 0.222           | -0.31                 | 0.006   | 0.655           | -0.46                | 0.003   | 0.114           |
| <b>Meox2</b>                      | NM_008584                  | ref Mus musculus mesenchyme homeobox 2 (Meox2), mRNA [NM_008584]                                                                                            | -0.52                 | 0.016   | 0.425           | -0.25                 | 0.020   | 0.895           | -0.38                | 0.017   | 0.276           |
| <b>Acot7</b>                      | NM_133348                  | ref Mus musculus acyl-CoA thioesterase 7 (Acot7), transcript variant 2, mRNA [NM_133348]                                                                    | -0.53                 | 0.002   | 0.254           | -0.23                 | 0.019   | 0.881           | -0.44                | 0.001   | 0.077           |
| <b>Pfkfb2</b>                     | NM_001162415               | ref Mus musculus 6-phosphofructo-2-kinase/fructose-2,6-biphosphatase 2 (Pfkfb2), transcript variant 2, mRNA [NM_001162415]                                  | -0.53                 | 0.004   | 0.312           | -0.25                 | 0.008   | 0.694           | -0.65                | 0.000   | 0.019           |
| <b>Mvk</b>                        | NM_023556                  | ref Mus musculus mevalonate kinase (Mvk), mRNA [NM_023556]                                                                                                  | -0.53                 | 0.000   | 0.095           | -0.27                 | 0.006   | 0.643           | -0.55                | 0.000   | 0.019           |
| <b>Mmab</b>                       | NM_029956                  | ref Mus musculus methylmalonic aciduria (cobalamin deficiency) type B homolog (human) (Mmab), nuclear gene encoding mitochondrial protein, mRNA [NM_029956] | -0.53                 | 0.002   | 0.258           | -0.46                 | 0.000   | 0.137           | -0.38                | 0.008   | 0.192           |
| <b>Prkcζ</b>                      | NM_008860                  | ref Mus musculus protein kinase C, zeta (Prkcζ), transcript variant 1, mRNA [NM_008860]                                                                     | -0.54                 | 0.009   | 0.398           | -0.23                 | 0.049   | 1.000           | -0.47                | 0.014   | 0.251           |
| <b>chr4:140609589-140614789_F</b> | chr4:140609589-140614789_F | lincRNA:chr4:140609589-140614789 forward strand                                                                                                             | -0.54                 | 0.004   | 0.308           | -0.69                 | 0.013   | 0.802           | -0.64                | 0.007   | 0.182           |
| <b>Tspan12</b>                    | NM_173007                  | ref Mus musculus tetraspanin 12 (Tspan12), mRNA [NM_173007]                                                                                                 | -0.54                 | 0.003   | 0.299           | -0.23                 | 0.007   | 0.674           | -0.35                | 0.040   | 0.414           |
| <b>Pcyt2</b>                      | NM_024229                  | ref Mus musculus phosphate cytidylyltransferase 2, ethanolamine (Pcyt2), mRNA [NM_024229]                                                                   | -0.54                 | 0.000   | 0.090           | -0.27                 | 0.002   | 0.367           | -0.66                | 0.000   | 0.004           |



Online Supplemental Table IV: All Three Overlap

| Gene Symbol                      | RefSeq                    | Description                                                                                                                              | logFC<br>mG4H-<br>STZ | P-value | Adj.<br>P-value | logFC<br>mG4H-<br>Veh | P-value | Adj.<br>P-value | logFC<br>Con-<br>STZ | P-value | Adj.<br>P-value |
|----------------------------------|---------------------------|------------------------------------------------------------------------------------------------------------------------------------------|-----------------------|---------|-----------------|-----------------------|---------|-----------------|----------------------|---------|-----------------|
| <b>Rab37</b>                     | NM_001163753              | ref Mus musculus RAB37, member of RAS oncogene family (Rab37), transcript variant 2, mRNA [NM_001163753]                                 | -0.55                 | 0.002   | 0.278           | -0.17                 | 0.050   | 1.000           | -0.44                | 0.007   | 0.183           |
| <b>Psmb9</b>                     | NM_013585                 | ref Mus musculus proteasome (prosome, macropain) subunit, beta type 9 (large multifunctional peptidase 2) (Psmb9), mRNA [NM_013585]      | -0.55                 | 0.032   | 0.485           | -0.24                 | 0.023   | 0.935           | -0.45                | 0.017   | 0.274           |
| <b>Ivd</b>                       | NM_019826                 | ref Mus musculus isovaleryl coenzyme A dehydrogenase (Ivd), nuclear gene encoding mitochondrial protein, mRNA [NM_019826]                | -0.55                 | 0.001   | 0.197           | -0.59                 | 0.000   | 0.013           | -0.46                | 0.006   | 0.157           |
| <b>Cyb5</b>                      | NM_025797                 | ref Mus musculus cytochrome b-5 (Cyb5), mRNA [NM_025797]                                                                                 | -0.55                 | 0.000   | 0.110           | -0.49                 | 0.000   | 0.020           | -0.36                | 0.000   | 0.041           |
| <b>Kcnk1</b>                     | NM_008430                 | ref Mus musculus potassium channel, subfamily K, member 1 (Kcnk1), mRNA [NM_008430]                                                      | -0.55                 | 0.008   | 0.392           | -0.29                 | 0.039   | 1.000           | -0.50                | 0.005   | 0.155           |
| <b>Bcat2</b>                     | NM_009737                 | ref Mus musculus branched chain aminotransferase 2, mitochondrial (Bcat2), nuclear gene encoding mitochondrial protein, mRNA [NM_009737] | -0.55                 | 0.000   | 0.148           | -0.54                 | 0.000   | 0.113           | -0.33                | 0.028   | 0.353           |
| <b>Tbc1d10c</b>                  | NM_178650                 | ref Mus musculus TBC1 domain family, member 10c (Tbc1d10c), mRNA [NM_178650]                                                             | -0.55                 | 0.010   | 0.403           | -0.38                 | 0.041   | 1.000           | -0.60                | 0.017   | 0.278           |
| <b>Mpv17l</b>                    | NM_033564                 | ref Mus musculus Mpv17 transgene, kidney disease mutant-like (Mpv17l), nuclear gene encoding mitochondrial protein, mRNA [NM_033564]     | -0.55                 | 0.003   | 0.283           | -0.47                 | 0.012   | 0.793           | -0.47                | 0.020   | 0.300           |
| <b>Isoc2a</b>                    | NM_001101598              | ref Mus musculus isochorismatase domain containing 2a (Isoc2a), nuclear gene encoding mitochondrial protein, mRNA [NM_001101598]         | -0.56                 | 0.002   | 0.281           | -0.35                 | 0.001   | 0.217           | -0.52                | 0.005   | 0.155           |
| <b>Gm4324</b>                    | XM_001478262              | ref PREDICTED: Mus musculus similar to hCG1657343 (LOC100047488), mRNA [XM_001478262]                                                    | -0.56                 | 0.008   | 0.390           | -0.44                 | 0.029   | 0.986           | -0.66                | 0.003   | 0.117           |
| <b>1190003J15Rik</b>             | NM_029821                 | ref Mus musculus RIKEN cDNA 1190003J15 gene (1190003J15Rik), mRNA [NM_029821]                                                            | -0.56                 | 0.003   | 0.285           | -0.31                 | 0.038   | 1.000           | -0.66                | 0.001   | 0.051           |
| <b>chr13:78370478-78371404_F</b> | chr13:78370478-78371404_F | lincRNA:chr13:78370478-78371404 forward strand                                                                                           | -0.56                 | 0.001   | 0.245           | -0.41                 | 0.025   | 0.965           | -0.50                | 0.002   | 0.094           |
| <b>Tmem180</b>                   | NM_029186                 | ref Mus musculus transmembrane protein 180 (Tmem180), mRNA [NM_029186]                                                                   | -0.56                 | 0.001   | 0.248           | -0.25                 | 0.008   | 0.694           | -0.34                | 0.003   | 0.123           |
| <b>Slc7a4</b>                    | NM_144852                 | ref Mus musculus solute carrier family 7 (cationic amino acid transporter, y+ system), member 4 (Slc7a4), mRNA [NM_144852]               | -0.57                 | 0.000   | 0.154           | -0.31                 | 0.001   | 0.331           | -0.78                | 0.000   | 0.013           |
| <b>Clec4b1</b>                   | NM_001190310              | ref Mus musculus C-type lectin domain family 4, member b1 (Clec4b1), transcript variant 1, mRNA [NM_001190310]                           | -0.57                 | 0.002   | 0.266           | -0.39                 | 0.018   | 0.874           | -0.32                | 0.038   | 0.406           |
| <b>Dcaf12l1</b>                  | NM_178739                 | ref Mus musculus DDB1 and CUL4 associated factor 12-like 1 (Dcaf12l1), mRNA [NM_178739]                                                  | -0.57                 | 0.005   | 0.339           | -0.27                 | 0.043   | 1.000           | -0.58                | 0.026   | 0.342           |

Online Supplemental Table IV: All Three Overlap

| Gene Symbol               | RefSeq             | Description                                                                                                                                                                            | logFC<br>mG4H-<br>STZ | P-value | Adj.<br>P-value | logFC<br>mG4H-<br>Veh | P-value | Adj.<br>P-value | logFC<br>Con-<br>STZ | P-value | Adj.<br>P-value |
|---------------------------|--------------------|----------------------------------------------------------------------------------------------------------------------------------------------------------------------------------------|-----------------------|---------|-----------------|-----------------------|---------|-----------------|----------------------|---------|-----------------|
| <b>Mmab</b>               | NM_029956          | ref Mus musculus methylmalonic aciduria (cobalamin deficiency) type B homolog (human) (Mmab), nuclear gene encoding mitochondrial protein, mRNA [NM_029956]                            | -0.57                 | 0.001   | 0.184           | -0.47                 | 0.000   | 0.027           | -0.47                | 0.000   | 0.027           |
| <b>1700072E05Rik</b>      | NM_028554          | ref Mus musculus RIKEN cDNA 1700072E05 gene (1700072E05Rik), mRNA [NM_028554]                                                                                                          | -0.57                 | 0.032   | 0.485           | -0.72                 | 0.013   | 0.802           | -0.43                | 0.028   | 0.349           |
| <b>Klra1</b>              | NM_016659          | ref Mus musculus killer cell lectin-like receptor, subfamily A, member 1 (Klra1), mRNA [NM_016659]                                                                                     | -0.57                 | 0.003   | 0.299           | -0.33                 | 0.027   | 0.982           | -0.53                | 0.006   | 0.170           |
| <b>Cdh16</b>              | NM_007663          | ref Mus musculus cadherin 16 (Cdh16), mRNA [NM_007663]                                                                                                                                 | -0.58                 | 0.001   | 0.169           | -0.64                 | 0.000   | 0.053           | -0.48                | 0.000   | 0.041           |
| <b>Gstk1</b>              | NM_029555          | ref Mus musculus glutathione S-transferase kappa 1 (Gstk1), nuclear gene encoding mitochondrial protein, mRNA [NM_029555]                                                              | -0.58                 | 0.001   | 0.167           | -0.38                 | 0.001   | 0.263           | -0.65                | 0.000   | 0.034           |
| <b>Dctpp1</b>             | NM_023203          | ref Mus musculus dCTP pyrophosphatase 1 (Dctpp1), mRNA [NM_023203]                                                                                                                     | -0.58                 | 0.003   | 0.281           | -0.17                 | 0.020   | 0.895           | -0.43                | 0.002   | 0.093           |
| <b>BC016495</b>           | NM_145497          | ref Mus musculus cDNA sequence BC016495 (BC016495), mRNA [NM_145497]                                                                                                                   | -0.58                 | 0.001   | 0.234           | -0.24                 | 0.018   | 0.874           | -0.59                | 0.001   | 0.061           |
| <b>Pfn4</b>               | NM_028376          | ref Mus musculus profilin family, member 4 (Pfn4), mRNA [NM_028376]                                                                                                                    | -0.58                 | 0.008   | 0.392           | -0.21                 | 0.043   | 1.000           | -0.49                | 0.004   | 0.130           |
| <b>ENSMUST00000105667</b> | ENSMUST00000105667 | ens Novel protein [Source:UniProtKB/TrEMBL;Acc:A2A899] [ENSMUST00000105667]                                                                                                            | -0.58                 | 0.001   | 0.188           | -0.27                 | 0.043   | 1.000           | -0.80                | 0.000   | 0.019           |
| <b>Sept4</b>              | NM_011129          | ref Mus musculus septin 4 (Sept4), mRNA [NM_011129]                                                                                                                                    | -0.59                 | 0.008   | 0.391           | -0.17                 | 0.032   | 1.000           | -0.43                | 0.003   | 0.117           |
| <b>Ccbl2</b>              | NM_173763          | ref Mus musculus cysteine conjugate-beta lyase 2 (Ccbl2), mRNA [NM_173763]                                                                                                             | -0.59                 | 0.013   | 0.412           | -0.75                 | 0.000   | 0.012           | -0.47                | 0.012   | 0.238           |
| <b>Rpl7a-ps8</b>          | ENSMUST00000094754 | ref PREDICTED: Mus musculus predicted gene, EG243872 (EG243872), mRNA [XM_905543]                                                                                                      | -0.59                 | 0.000   | 0.117           | -0.28                 | 0.012   | 0.793           | -0.66                | 0.001   | 0.059           |
| <b>Scin</b>               | NM_009132          | ref Mus musculus scinderin (Scin), transcript variant 2, mRNA [NM_009132]                                                                                                              | -0.59                 | 0.010   | 0.400           | -0.58                 | 0.012   | 0.786           | -0.44                | 0.012   | 0.237           |
| <b>Hn1l</b>               | NM_198937          | ref Mus musculus hematological and neurological expressed 1-like (Hn1l), mRNA [NM_198937]                                                                                              | -0.59                 | 0.002   | 0.281           | -0.23                 | 0.047   | 1.000           | -0.44                | 0.020   | 0.295           |
| <b>Slc25a29</b>           | NM_181328          | ref Mus musculus solute carrier family 25 (mitochondrial carrier, palmitoylcarnitine transporter), member 29 (Slc25a29), nuclear gene encoding mitochondrial protein, mRNA [NM_181328] | -0.59                 | 0.002   | 0.262           | -0.28                 | 0.004   | 0.561           | -0.81                | 0.000   | 0.002           |
| <b>Hist2h2aa1</b>         | NM_013549          | ref Mus musculus histone cluster 2, H2aa1 (Hist2h2aa1), mRNA [NM_013549]                                                                                                               | -0.60                 | 0.001   | 0.167           | -0.26                 | 0.005   | 0.588           | -0.58                | 0.000   | 0.029           |
| <b>Aass</b>               | NM_013930          | ref Mus musculus aminoadipate-semialdehyde synthase (Aass), nuclear gene encoding mitochondrial protein, mRNA [NM_013930]                                                              | -0.60                 | 0.003   | 0.305           | -0.54                 | 0.014   | 0.820           | -0.86                | 0.001   | 0.053           |

Online Supplemental Table IV: All Three Overlap

| Gene Symbol                     | RefSeq                   | Description                                                                                                                                           | logFC<br>mG4H-<br>STZ | P-value | Adj.<br>P-value | logFC<br>mG4H-<br>Veh | P-value | Adj.<br>P-value | logFC<br>Con-<br>STZ | P-value | Adj.<br>P-value |
|---------------------------------|--------------------------|-------------------------------------------------------------------------------------------------------------------------------------------------------|-----------------------|---------|-----------------|-----------------------|---------|-----------------|----------------------|---------|-----------------|
| <b>Coq10a</b>                   | NM_001081040             | ref Mus musculus coenzyme Q10 homolog A (yeast) (Coq10a), nuclear gene encoding mitochondrial protein, mRNA [NM_001081040]                            | -0.60                 | 0.000   | 0.136           | -0.34                 | 0.000   | 0.131           | -0.57                | 0.000   | 0.038           |
| <b>2900060N18Rik</b>            | AK077811                 | gb Mus musculus adult male thymus cDNA, RIKEN full-length enriched library, clone:5830496N14 product:unclassifiable, full insert sequence. [AK077811] | -0.60                 | 0.023   | 0.454           | -0.45                 | 0.029   | 0.990           | -0.37                | 0.028   | 0.349           |
| <b>Sun3</b>                     | NM_177576                | ref Mus musculus Sad1 and UNC84 domain containing 3 (Sun3), mRNA [NM_177576]                                                                          | -0.60                 | 0.007   | 0.384           | -0.67                 | 0.000   | 0.022           | -0.82                | 0.015   | 0.260           |
| <b>Calhm3</b>                   | XM_001472011             | ref PREDICTED: Mus musculus predicted gene, EG240669 (EG240669), mRNA [XM_001472011]                                                                  | -0.61                 | 0.000   | 0.092           | -0.59                 | 0.010   | 0.746           | -0.66                | 0.003   | 0.114           |
| <b>chr7:4827340-4863315_F</b>   | chr7:4827340-4863315_F   | lincRNA:chr7:4827340-4863315 forward strand                                                                                                           | -0.61                 | 0.001   | 0.197           | -0.43                 | 0.001   | 0.200           | -0.57                | 0.002   | 0.085           |
| <b>Echdc3</b>                   | NM_024208                | ref Mus musculus enoyl Coenzyme A hydratase domain containing 3 (Echdc3), nuclear gene encoding mitochondrial protein, mRNA [NM_024208]               | -0.61                 | 0.007   | 0.370           | -0.27                 | 0.007   | 0.686           | -0.84                | 0.000   | 0.045           |
| <b>chr4:11899775-11931875_F</b> | chr4:11899775-11931875_F | lincRNA:chr4:11899775-11931875 forward strand                                                                                                         | -0.62                 | 0.002   | 0.279           | -0.21                 | 0.043   | 1.000           | -0.69                | 0.000   | 0.021           |
| <b>Ift81</b>                    | NM_009879                | ref Mus musculus intraflagellar transport 81 homolog (Chlamydomonas) (Ift81), mRNA [NM_009879]                                                        | -0.62                 | 0.001   | 0.206           | -0.34                 | 0.003   | 0.488           | -0.52                | 0.001   | 0.060           |
| <b>chr7:4827340-4863315_F</b>   | chr7:4827340-4863315_F   | lincRNA:chr7:4827340-4863315 forward strand                                                                                                           | -0.62                 | 0.002   | 0.262           | -0.28                 | 0.011   | 0.766           | -0.80                | 0.001   | 0.069           |
| <b>Hsph1</b>                    | NM_013559                | ref Mus musculus heat shock 105kDa/110kDa protein 1 (Hsph1), mRNA [NM_013559]                                                                         | -0.62                 | 0.016   | 0.428           | -0.26                 | 0.011   | 0.766           | -0.54                | 0.001   | 0.080           |
| <b>Klra9</b>                    | NM_010651                | ref Mus musculus killer cell lectin-like receptor subfamily A, member 9 (Klra9), mRNA [NM_010651]                                                     | -0.63                 | 0.002   | 0.262           | -0.36                 | 0.025   | 0.957           | -0.62                | 0.000   | 0.030           |
| <b>Prodh</b>                    | NM_011172                | ref Mus musculus proline dehydrogenase (Prodh), nuclear gene encoding mitochondrial protein, mRNA [NM_011172]                                         | -0.63                 | 0.003   | 0.308           | -0.43                 | 0.001   | 0.317           | -0.40                | 0.041   | 0.419           |
| <b>Alkbh7</b>                   | NM_025538                | ref Mus musculus alkB, alkylation repair homolog 7 (E. coli) (Alkbh7), mRNA [NM_025538]                                                               | -0.63                 | 0.000   | 0.160           | -0.19                 | 0.025   | 0.963           | -0.56                | 0.000   | 0.026           |
| <b>Gm9961</b>                   | NR_033509                | ref Mus musculus predicted gene 9961 (Gm9961), non-coding RNA [NR_033509]                                                                             | -0.64                 | 0.000   | 0.095           | -0.70                 | 0.000   | 0.059           | -0.37                | 0.017   | 0.279           |
| <b>Aldh1l1</b>                  | NM_027406                | ref Mus musculus aldehyde dehydrogenase 1 family, member L1 (Aldh1l1), mRNA [NM_027406]                                                               | -0.64                 | 0.022   | 0.452           | -0.82                 | 0.001   | 0.218           | -0.85                | 0.003   | 0.112           |
| <b>Rimk1a</b>                   | NM_177572                | ref Mus musculus ribosomal modification protein rimK-like family member A (Rimk1a), mRNA [NM_177572]                                                  | -0.64                 | 0.000   | 0.095           | -0.32                 | 0.022   | 0.917           | -0.67                | 0.000   | 0.042           |
| <b>Ccdc46</b>                   | NM_029606                | ref Mus musculus coiled-coil domain containing 46 (Ccdc46), transcript variant 2, mRNA [NM_029606]                                                    | -0.64                 | 0.022   | 0.452           | -0.41                 | 0.001   | 0.292           | -0.30                | 0.020   | 0.297           |
| <b>Pdp2</b>                     | NM_001024606             | ref Mus musculus pyruvate dehydrogenase phosphatase catalytic subunit 2 (Pdp2), mRNA [NM_001024606]                                                   | -0.64                 | 0.002   | 0.258           | -0.39                 | 0.004   | 0.550           | -0.81                | 0.000   | 0.010           |

Online Supplemental Table IV: All Three Overlap

| Gene Symbol                      | RefSeq                    | Description                                                                                                               | logFC<br>mG4H-<br>STZ | P-value | Adj.<br>P-value | logFC<br>mG4H-<br>Veh | P-value | Adj.<br>P-value | logFC<br>Con-<br>STZ | P-value | Adj.<br>P-value |
|----------------------------------|---------------------------|---------------------------------------------------------------------------------------------------------------------------|-----------------------|---------|-----------------|-----------------------|---------|-----------------|----------------------|---------|-----------------|
| <b>chr2:77152807-77155092_R</b>  | chr2:77152807-77155092_R  | lincRNA:chr2:77152807-77155092 reverse strand                                                                             | -0.65                 | 0.002   | 0.258           | -0.42                 | 0.002   | 0.371           | -0.76                | 0.000   | 0.029           |
| <b>Srrm4</b>                     | NM_026886                 | ref Mus musculus serine/arginine repetitive matrix 4 (Srrm4), mRNA [NM_026886]                                            | -0.65                 | 0.010   | 0.402           | -0.36                 | 0.007   | 0.679           | -0.32                | 0.028   | 0.353           |
| <b>chr7:4827340-4863315_F</b>    | chr7:4827340-4863315_F    | lincRNA:chr7:4827340-4863315 forward strand                                                                               | -0.65                 | 0.001   | 0.226           | -0.44                 | 0.000   | 0.094           | -0.59                | 0.001   | 0.071           |
| <b>Gm6684</b>                    | XM_891145                 | ref PREDICTED: Mus musculus predicted gene, EG626549 (EG626549), mRNA [XM_891145]                                         | -0.66                 | 0.000   | 0.104           | -0.44                 | 0.000   | 0.042           | -0.58                | 0.000   | 0.013           |
| <b>Ubash3b</b>                   | ENSMUST00000044155        | ens ubiquitin associated and SH3 domain containing, B Gene [Source:MGI (curated);Acc:MGI:1920078] [ENSMUST00000044155]    | -0.66                 | 0.012   | 0.412           | -0.25                 | 0.005   | 0.587           | -0.66                | 0.006   | 0.156           |
| <b>Hist1h3g</b>                  | NM_145073                 | ref Mus musculus histone cluster 1, H3g (Hist1h3g), mRNA [NM_145073]                                                      | -0.66                 | 0.004   | 0.312           | -0.30                 | 0.007   | 0.674           | -0.66                | 0.000   | 0.029           |
| <b>Ccbl2</b>                     | NM_173763                 | ref Mus musculus cysteine conjugate-beta lyase 2 (Ccbl2), mRNA [NM_173763]                                                | -0.66                 | 0.002   | 0.248           | -0.84                 | 0.000   | 0.003           | -0.56                | 0.000   | 0.030           |
| <b>Hsph1</b>                     | NM_013559                 | ref Mus musculus heat shock 105kDa/110kDa protein 1 (Hsph1), mRNA [NM_013559]                                             | -0.67                 | 0.015   | 0.418           | -0.24                 | 0.020   | 0.894           | -0.53                | 0.002   | 0.086           |
| <b>Celsr1</b>                    | NM_009886                 | ref Mus musculus cadherin, EGF LAG seven-pass G-type receptor 1 (flamingo homolog, Drosophila) (Celsr1), mRNA [NM_009886] | -0.67                 | 0.000   | 0.064           | -0.44                 | 0.000   | 0.159           | -0.75                | 0.000   | 0.029           |
| <b>Armc2</b>                     | NM_001034858              | ref Mus musculus armadillo repeat containing 2 (Armc2), mRNA [NM_001034858]                                               | -0.68                 | 0.008   | 0.389           | -0.91                 | 0.000   | 0.008           | -0.41                | 0.049   | 0.455           |
| <b>chr17:13020750-13033750_R</b> | chr17:13020750-13033750_R | lincRNA:chr17:13020750-13033750 reverse strand                                                                            | -0.68                 | 0.011   | 0.407           | -0.46                 | 0.006   | 0.632           | -0.47                | 0.003   | 0.117           |
| <b>Bfsp2</b>                     | NM_001002896              | ref Mus musculus beaded filament structural protein 2, phakinin (Bfsp2), mRNA [NM_001002896]                              | -0.68                 | 0.002   | 0.272           | -0.60                 | 0.000   | 0.098           | -0.53                | 0.009   | 0.203           |
| <b>Asb10</b>                     | NM_080444                 | ref Mus musculus ankyrin repeat and SOCS box-containing 10 (Asb10), mRNA [NM_080444]                                      | -0.69                 | 0.004   | 0.315           | -0.19                 | 0.046   | 1.000           | -0.64                | 0.000   | 0.032           |
| <b>Pcdhac2</b>                   | NM_001003672              | ref Mus musculus protocadherin alpha subfamily C, 2 (Pcdhac2), mRNA [NM_001003672]                                        | -0.69                 | 0.005   | 0.348           | -0.37                 | 0.043   | 1.000           | -0.56                | 0.044   | 0.435           |
| <b>Gm3697</b>                    | XM_001478221              | ref PREDICTED: Mus musculus hypothetical protein LOC100042151 (LOC100042151), mRNA [XM_001478221]                         | -0.69                 | 0.002   | 0.262           | -0.58                 | 0.003   | 0.508           | -0.39                | 0.033   | 0.378           |
| <b>ENSMUST00000078633</b>        | ENSMUST00000078633        | ens fer-1-like 5 (C. elegans) Gene [Source:MGI (curated);Acc:MGI:3616091] [ENSMUST00000078633]                            | -0.69                 | 0.032   | 0.483           | -0.57                 | 0.036   | 1.000           | -0.73                | 0.004   | 0.127           |
| <b>Sdf2l1</b>                    | NM_022324                 | ref Mus musculus stromal cell-derived factor 2-like 1 (Sdf2l1), mRNA [NM_022324]                                          | -0.69                 | 0.003   | 0.297           | -0.27                 | 0.016   | 0.848           | -0.43                | 0.003   | 0.123           |
| <b>chr4:88604248-88645948_R</b>  | chr4:88604248-88645948_R  | lincRNA:chr4:88604248-88645948 reverse strand                                                                             | -0.69                 | 0.001   | 0.237           | -0.51                 | 0.011   | 0.781           | -0.58                | 0.032   | 0.373           |

Online Supplemental Table IV: All Three Overlap

| Gene Symbol                     | RefSeq                   | Description                                                                                                                                         | logFC<br>mG4H-<br>STZ | P-value | Adj.<br>P-value | logFC<br>mG4H-<br>Veh | P-value | Adj.<br>P-value | logFC<br>Con-<br>STZ | P-value | Adj.<br>P-value |
|---------------------------------|--------------------------|-----------------------------------------------------------------------------------------------------------------------------------------------------|-----------------------|---------|-----------------|-----------------------|---------|-----------------|----------------------|---------|-----------------|
| <b>Mfsd4</b>                    | NM_001114662             | ref Mus musculus major facilitator superfamily domain containing 4 (Mfsd4), transcript variant b, mRNA [NM_001114662]                               | -0.70                 | 0.001   | 0.163           | -0.35                 | 0.007   | 0.674           | -0.90                | 0.000   | 0.028           |
| <b>chr7:4827340-4863315_F</b>   | chr7:4827340-4863315_F   | lincRNA:chr7:4827340-4863315 forward strand                                                                                                         | -0.70                 | 0.000   | 0.157           | -0.36                 | 0.001   | 0.263           | -0.53                | 0.004   | 0.137           |
| <b>chr7:4827340-4863315_F</b>   | chr7:4827340-4863315_F   | lincRNA:chr7:4827340-4863315 forward strand                                                                                                         | -0.70                 | 0.001   | 0.167           | -0.37                 | 0.000   | 0.190           | -0.48                | 0.002   | 0.083           |
| <b>Dbt</b>                      | NM_010022                | ref Mus musculus dihydrolipoamide branched chain transacylase E2 (Dbt), nuclear gene encoding mitochondrial protein, mRNA [NM_010022]               | -0.70                 | 0.005   | 0.343           | -0.52                 | 0.000   | 0.025           | -0.67                | 0.000   | 0.020           |
| <b>chr4:11899775-11931875_F</b> | chr4:11899775-11931875_F | lincRNA:chr4:11899775-11931875 forward strand                                                                                                       | -0.70                 | 0.001   | 0.199           | -0.27                 | 0.014   | 0.825           | -0.74                | 0.000   | 0.016           |
| <b>Palb2</b>                    | NM_001081238             | ref Mus musculus partner and localizer of BRCA2 (Palb2), mRNA [NM_001081238]                                                                        | -0.70                 | 0.004   | 0.311           | -0.36                 | 0.020   | 0.890           | -0.80                | 0.001   | 0.050           |
| <b>Il17re</b>                   | NM_001034031             | ref Mus musculus interleukin 17 receptor E (Il17re), transcript variant 3, mRNA [NM_001034031]                                                      | -0.70                 | 0.006   | 0.369           | -0.50                 | 0.014   | 0.820           | -0.76                | 0.009   | 0.201           |
| <b>Mettl11b</b>                 | NM_001143956             | ref Mus musculus methyltransferase like 11B (Mettl11b), mRNA [NM_001143956]                                                                         | -0.71                 | 0.001   | 0.248           | -0.43                 | 0.009   | 0.720           | -0.75                | 0.003   | 0.117           |
| <b>Bckdhb</b>                   | NM_199195                | ref Mus musculus branched chain ketoacid dehydrogenase E1, beta polypeptide (Bckdhb), nuclear gene encoding mitochondrial protein, mRNA [NM_199195] | -0.71                 | 0.000   | 0.162           | -0.62                 | 0.000   | 0.038           | -0.63                | 0.000   | 0.042           |
| <b>Hk2</b>                      | NM_013820                | ref Mus musculus hexokinase 2 (Hk2), mRNA [NM_013820]                                                                                               | -0.71                 | 0.001   | 0.208           | -0.27                 | 0.005   | 0.621           | -0.81                | 0.000   | 0.036           |
| <b>Kcnd2</b>                    | NM_019697                | ref Mus musculus potassium voltage-gated channel, Shal-related family, member 2 (Kcnd2), mRNA [NM_019697]                                           | -0.71                 | 0.001   | 0.171           | -0.38                 | 0.028   | 0.983           | -1.01                | 0.000   | 0.011           |
| <b>Trp53i11</b>                 | NM_001025246             | ref Mus musculus transformation related protein 53 inducible protein 11 (Trp53i11), mRNA [NM_001025246]                                             | -0.72                 | 0.001   | 0.231           | -0.33                 | 0.016   | 0.848           | -0.56                | 0.008   | 0.183           |
| <b>Cth</b>                      | NM_145953                | ref Mus musculus cystathionase (cystathionine gamma-lyase) (Cth), mRNA [NM_145953]                                                                  | -0.72                 | 0.040   | 0.501           | -0.90                 | 0.000   | 0.090           | -0.58                | 0.008   | 0.184           |
| <b>D4Bwg0951e</b>               | NM_026821                | ref Mus musculus DNA segment, Chr 4, Brigham & Women's Genetics 0951 expressed (D4Bwg0951e), mRNA [NM_026821]                                       | -0.72                 | 0.006   | 0.366           | -0.29                 | 0.043   | 1.000           | -0.59                | 0.009   | 0.201           |
| <b>ENSMUST00000106148</b>       | ENSMUST00000106148       | ens dicarbonyl L-xylulose reductase Gene [Source:MGI (curated);Acc:MGI:1915130] [ENSMUST00000106148]                                                | -0.73                 | 0.001   | 0.243           | -0.77                 | 0.000   | 0.004           | -0.61                | 0.000   | 0.036           |
| <b>Rdh5</b>                     | NM_134006                | ref Mus musculus retinol dehydrogenase 5 (Rdh5), mRNA [NM_134006]                                                                                   | -0.73                 | 0.002   | 0.281           | -0.25                 | 0.010   | 0.747           | -0.61                | 0.000   | 0.034           |
| <b>Grin2c</b>                   | NM_010350                | ref Mus musculus glutamate receptor, ionotropic, NMDA2C (epsilon 3) (Grin2c), mRNA [NM_010350]                                                      | -0.73                 | 0.009   | 0.399           | -1.07                 | 0.000   | 0.015           | -1.02                | 0.001   | 0.067           |

Online Supplemental Table IV: All Three Overlap

| Gene Symbol                     | RefSeq                   | Description                                                                                                                                     | logFC<br>mG4H-<br>STZ | P-value | Adj.<br>P-value | logFC<br>mG4H-<br>Veh | P-value | Adj.<br>P-value | logFC<br>Con-<br>STZ | P-value | Adj.<br>P-value |
|---------------------------------|--------------------------|-------------------------------------------------------------------------------------------------------------------------------------------------|-----------------------|---------|-----------------|-----------------------|---------|-----------------|----------------------|---------|-----------------|
| <b>Aldh1b1</b>                  | NM_028270                | ref Mus musculus aldehyde dehydrogenase 1 family, member B1 (Aldh1b1), nuclear gene encoding mitochondrial protein, mRNA [NM_028270]            | -0.74                 | 0.000   | 0.045           | -0.28                 | 0.018   | 0.868           | -0.96                | 0.000   | 0.004           |
| <b>Gm3154</b>                   | XM_001476661             | ref PREDICTED: Mus musculus hypothetical protein LOC100041131 (LOC100041131), mRNA [XM_001476661]                                               | -0.74                 | 0.011   | 0.407           | -0.58                 | 0.003   | 0.488           | -0.53                | 0.020   | 0.299           |
| <b>ENSMUST00000061643</b>       | ENSMUST00000061643       | ens RIKEN cDNA 2610303G11 gene Gene [Source:MGI Symbol;Acc:MGI:1917707] [ENSMUST00000061643]                                                    | -0.74                 | 0.001   | 0.169           | -0.91                 | 0.011   | 0.770           | -0.68                | 0.018   | 0.281           |
| <b>Eif4e</b>                    | NM_007917                | ref Mus musculus eukaryotic translation initiation factor 4E (Eif4e), mRNA [NM_007917]                                                          | -0.74                 | 0.019   | 0.441           | -0.29                 | 0.033   | 1.000           | -0.67                | 0.015   | 0.260           |
| <b>Rhox2e</b>                   | NM_001085348             | ref Mus musculus reproductive homeobox 2E (Rhox2e), mRNA [NM_001085348]                                                                         | -0.74                 | 0.003   | 0.281           | -0.45                 | 0.001   | 0.317           | -0.91                | 0.000   | 0.012           |
| <b>Gm4703</b>                   | XM_001481156             | ref PREDICTED: Mus musculus hypothetical protein LOC100043874 (LOC100043874), mRNA [XM_001481156]                                               | -0.75                 | 0.002   | 0.262           | -0.67                 | 0.000   | 0.174           | -0.39                | 0.008   | 0.191           |
| <b>Slc9a2</b>                   | NM_001033289             | ref Mus musculus solute carrier family 9 (sodium/hydrogen exchanger), member 2 (Slc9a2), mRNA [NM_001033289]                                    | -0.75                 | 0.003   | 0.285           | -0.43                 | 0.006   | 0.655           | -1.08                | 0.000   | 0.042           |
| <b>chr4:11893711-11921443_F</b> | chr4:11893711-11921443_F | lincRNA:chr4:11893711-11921443 forward strand                                                                                                   | -0.75                 | 0.000   | 0.157           | -0.23                 | 0.035   | 1.000           | -0.78                | 0.000   | 0.028           |
| <b>Gng7</b>                     | NM_001038655             | ref Mus musculus guanine nucleotide binding protein (G protein), gamma 7 (Gng7), transcript variant 1, mRNA [NM_001038655]                      | -0.75                 | 0.003   | 0.281           | -0.38                 | 0.024   | 0.952           | -0.59                | 0.005   | 0.150           |
| <b>Epha4</b>                    | NM_007936                | ref Mus musculus Eph receptor A4 (Epha4), mRNA [NM_007936]                                                                                      | -0.76                 | 0.007   | 0.375           | -0.29                 | 0.014   | 0.825           | -0.90                | 0.000   | 0.007           |
| <b>Defb19</b>                   | NM_145157                | ref Mus musculus defensin beta 19 (Defb19), mRNA [NM_145157]                                                                                    | -0.76                 | 0.000   | 0.095           | -0.42                 | 0.003   | 0.440           | -0.59                | 0.008   | 0.190           |
| <b>chr4:11893711-11921443_F</b> | chr4:11893711-11921443_F | lincRNA:chr4:11893711-11921443 forward strand                                                                                                   | -0.76                 | 0.001   | 0.167           | -0.23                 | 0.029   | 0.992           | -0.75                | 0.000   | 0.044           |
| <b>LOC100041903</b>             | XM_001477720             | ref PREDICTED: Mus musculus similar to putative G-protein coupled receptor, transcript variant 2 (LOC100041903), mRNA [XM_001477720]            | -0.77                 | 0.044   | 0.513           | -0.28                 | 0.034   | 1.000           | -0.48                | 0.015   | 0.260           |
| <b>Fxyd6</b>                    | NM_022004                | ref Mus musculus FXYD domain-containing ion transport regulator 6 (Fxyd6), mRNA [NM_022004]                                                     | -0.77                 | 0.000   | 0.100           | -0.27                 | 0.022   | 0.924           | -0.77                | 0.000   | 0.024           |
| <b>Mpst</b>                     | NM_138670                | ref Mus musculus mercaptopyruvate sulfurtransferase (Mpst), nuclear gene encoding mitochondrial protein, transcript variant 1, mRNA [NM_138670] | -0.77                 | 0.000   | 0.084           | -0.49                 | 0.000   | 0.022           | -1.05                | 0.001   | 0.060           |
| <b>Pgap2</b>                    | NM_145583                | ref Mus musculus post-GPI attachment to proteins 2 (Pgap2), mRNA [NM_145583]                                                                    | -0.78                 | 0.001   | 0.183           | -0.33                 | 0.006   | 0.628           | -0.75                | 0.000   | 0.034           |

Online Supplemental Table IV: All Three Overlap

| Gene Symbol                | RefSeq                     | Description                                                                                                                        | logFC<br>mG4H-<br>STZ | P-value | Adj.<br>P-value | logFC<br>mG4H-<br>Veh | P-value | Adj.<br>P-value | logFC<br>Con-<br>STZ | P-value | Adj.<br>P-value |
|----------------------------|----------------------------|------------------------------------------------------------------------------------------------------------------------------------|-----------------------|---------|-----------------|-----------------------|---------|-----------------|----------------------|---------|-----------------|
| chr2:77152807-77155092_R   | chr2:77152807-77155092_R   | lincRNA:chr2:77152807-77155092 reverse strand                                                                                      | -0.78                 | 0.001   | 0.167           | -0.50                 | 0.011   | 0.766           | -1.04                | 0.001   | 0.058           |
| 2210011C24Rik              | ENSMUST00000056686         | ens RIKEN cDNA 2210011C24 gene Gene [Source:MGI Symbol;Acc:MGI:1917384] [ENSMUST00000056686]                                       | -0.78                 | 0.000   | 0.057           | -0.56                 | 0.000   | 0.023           | -0.62                | 0.000   | 0.008           |
| Ip6k3                      | NM_173027                  | ref Mus musculus inositol hexaphosphate kinase 3 (Ip6k3), mRNA [NM_173027]                                                         | -0.79                 | 0.023   | 0.456           | -0.30                 | 0.014   | 0.825           | -0.88                | 0.000   | 0.043           |
| Pgap2                      | NM_145583                  | ref Mus musculus post-GPI attachment to proteins 2 (Pgap2), mRNA [NM_145583]                                                       | -0.80                 | 0.000   | 0.151           | -0.36                 | 0.006   | 0.632           | -0.79                | 0.000   | 0.041           |
| Ddt                        | NM_010027                  | ref Mus musculus D-dopachrome tautomerase (Ddt), mRNA [NM_010027]                                                                  | -0.80                 | 0.000   | 0.031           | -0.48                 | 0.000   | 0.046           | -0.71                | 0.000   | 0.010           |
| chr4:11893711-11921443_F   | chr4:11893711-11921443_F   | lincRNA:chr4:11893711-11921443 forward strand                                                                                      | -0.80                 | 0.001   | 0.227           | -0.25                 | 0.025   | 0.965           | -0.85                | 0.000   | 0.032           |
| Cth                        | NM_145953                  | ref Mus musculus cystathionase (cystathionine gamma-lyase) (Cth), mRNA [NM_145953]                                                 | -0.80                 | 0.033   | 0.487           | -0.96                 | 0.000   | 0.148           | -0.60                | 0.012   | 0.231           |
| Tst                        | NM_009437                  | ref Mus musculus thiosulfate sulfurtransferase, mitochondrial (Tst), nuclear gene encoding mitochondrial protein, mRNA [NM_009437] | -0.80                 | 0.000   | 0.022           | -0.44                 | 0.001   | 0.218           | -0.88                | 0.000   | 0.003           |
| chr14:27930334-27930974_F  | chr14:27930334-27930974_F  | lincRNA:chr14:27930334-27930974 forward strand                                                                                     | -0.80                 | 0.008   | 0.390           | -0.38                 | 0.042   | 1.000           | -0.55                | 0.024   | 0.326           |
| Raver2                     | NM_183024                  | ref Mus musculus ribonucleoprotein, PTB-binding 2 (Raver2), mRNA [NM_183024]                                                       | -0.81                 | 0.002   | 0.279           | -0.27                 | 0.009   | 0.720           | -0.72                | 0.002   | 0.103           |
| Tst                        | NM_009437                  | ref Mus musculus thiosulfate sulfurtransferase, mitochondrial (Tst), nuclear gene encoding mitochondrial protein, mRNA [NM_009437] | -0.81                 | 0.000   | 0.044           | -0.47                 | 0.000   | 0.168           | -0.77                | 0.000   | 0.003           |
| Tmem37                     | NM_019432                  | ref Mus musculus transmembrane protein 37 (Tmem37), mRNA [NM_019432]                                                               | -0.81                 | 0.000   | 0.022           | -0.37                 | 0.002   | 0.363           | -0.67                | 0.000   | 0.009           |
| Olf1206                    | NM_001001810               | ref Mus musculus olfactory receptor 1206 (Olf1206), mRNA [NM_001001810]                                                            | -0.81                 | 0.000   | 0.144           | -0.47                 | 0.025   | 0.965           | -0.34                | 0.024   | 0.322           |
| chr4:126710640-126721240_R | chr4:126710640-126721240_R | lincRNA:chr4:126710640-126721240 reverse strand                                                                                    | -0.82                 | 0.010   | 0.401           | -0.57                 | 0.037   | 1.000           | -0.54                | 0.002   | 0.102           |
| chr1:139806645-139809498_F | chr1:139806645-139809498_F | lincRNA:chr1:139806645-139809498 forward strand                                                                                    | -0.82                 | 0.003   | 0.282           | -0.32                 | 0.043   | 1.000           | -0.30                | 0.040   | 0.413           |
| chr5:113594167-113645342_F | chr5:113594167-113645342_F | lincRNA:chr5:113594167-113645342 forward strand                                                                                    | -0.82                 | 0.003   | 0.303           | -0.69                 | 0.003   | 0.461           | -0.50                | 0.031   | 0.368           |
| Csprs                      | NM_033616                  | ref Mus musculus component of Sp100-rs (Csprs), mRNA [NM_033616]                                                                   | -0.82                 | 0.032   | 0.484           | -0.38                 | 0.008   | 0.710           | -0.53                | 0.006   | 0.163           |
| Tbx1                       | NM_011532                  | ref Mus musculus T-box 1 (Tbx1), mRNA [NM_011532]                                                                                  | -0.82                 | 0.002   | 0.272           | -0.37                 | 0.003   | 0.449           | -0.77                | 0.000   | 0.015           |
| Adig                       | NM_145635                  | ref Mus musculus adipogenin (Adig), mRNA [NM_145635]                                                                               | -0.83                 | 0.002   | 0.252           | -0.46                 | 0.007   | 0.686           | -0.57                | 0.010   | 0.213           |
| Gm5108                     | XR_002346                  | ref PREDICTED: Mus musculus predicted gene, EG330097 (EG330097), misc RNA [XR_002346]                                              | -0.83                 | 0.001   | 0.216           | -0.72                 | 0.047   | 1.000           | -0.51                | 0.020   | 0.296           |



Online Supplemental Table IV: All Three Overlap

| Gene Symbol                | RefSeq                     | Description                                                                                                                                                   | logFC<br>mG4H-<br>STZ | P-value | Adj.<br>P-value | logFC<br>mG4H-<br>Veh | P-value | Adj.<br>P-value | logFC<br>Con-<br>STZ | P-value | Adj.<br>P-value |
|----------------------------|----------------------------|---------------------------------------------------------------------------------------------------------------------------------------------------------------|-----------------------|---------|-----------------|-----------------------|---------|-----------------|----------------------|---------|-----------------|
| Rtn1                       | NM_153457                  | ref Mus musculus reticulon 1 (Rtn1), transcript variant 1, mRNA [NM_153457]                                                                                   | -0.83                 | 0.005   | 0.354           | -0.32                 | 0.015   | 0.832           | -0.72                | 0.009   | 0.198           |
| Gcdh                       | NM_008097                  | ref Mus musculus glutaryl-Coenzyme A dehydrogenase (Gcdh), nuclear gene encoding mitochondrial protein, transcript variant 1, mRNA [NM_008097]                | -0.84                 | 0.000   | 0.057           | -0.70                 | 0.000   | 0.004           | -0.76                | 0.000   | 0.017           |
| chr1:107866276-107887102_F | chr1:107866276-107887102_F | lincRNA:chr1:107866276-107887102 forward strand                                                                                                               | -0.84                 | 0.001   | 0.233           | -0.55                 | 0.039   | 1.000           | -0.65                | 0.005   | 0.149           |
| chr2:77152807-77155092_R   | chr2:77152807-77155092_R   | lincRNA:chr2:77152807-77155092 reverse strand                                                                                                                 | -0.85                 | 0.000   | 0.110           | -0.54                 | 0.003   | 0.488           | -1.00                | 0.000   | 0.012           |
| Poln                       | NM_181857                  | ref Mus musculus DNA polymerase N (Poln), mRNA [NM_181857]                                                                                                    | -0.86                 | 0.002   | 0.256           | -0.47                 | 0.021   | 0.914           | -1.18                | 0.000   | 0.030           |
| chr4:11899775-11931875_F   | chr4:11899775-11931875_F   | lincRNA:chr4:11899775-11931875 forward strand                                                                                                                 | -0.87                 | 0.001   | 0.184           | -0.36                 | 0.006   | 0.632           | -1.06                | 0.000   | 0.015           |
| Slc25a35                   | NM_028048                  | ref Mus musculus solute carrier family 25, member 35 (Slc25a35), mRNA [NM_028048]                                                                             | -0.88                 | 0.001   | 0.231           | -0.34                 | 0.028   | 0.986           | -0.72                | 0.004   | 0.135           |
| Ckb                        | NM_021273                  | ref Mus musculus creatine kinase, brain (Ckb), mRNA [NM_021273]                                                                                               | -0.89                 | 0.000   | 0.048           | -0.29                 | 0.001   | 0.263           | -0.80                | 0.000   | 0.010           |
| Poln                       | NM_181857                  | ref Mus musculus DNA polymerase N (Poln), mRNA [NM_181857]                                                                                                    | -0.89                 | 0.005   | 0.355           | -0.55                 | 0.003   | 0.434           | -1.43                | 0.001   | 0.073           |
| Tchhl1                     | NM_027762                  | ref Mus musculus trichohyalin-like 1 (Tchhl1), mRNA [NM_027762]                                                                                               | -0.90                 | 0.026   | 0.468           | -0.97                 | 0.000   | 0.132           | -0.75                | 0.001   | 0.078           |
| Lypd6                      | NM_177139                  | ref Mus musculus LY6/PLAUR domain containing 6 (Lypd6), transcript variant 1, mRNA [NM_177139]                                                                | -0.90                 | 0.001   | 0.173           | -0.63                 | 0.003   | 0.507           | -1.02                | 0.001   | 0.049           |
| LOC100048617               | XM_001480420               | ref PREDICTED: Mus musculus hypothetical protein LOC100048617 (LOC100048617), mRNA [XM_001480420]                                                             | -0.90                 | 0.008   | 0.390           | -0.21                 | 0.026   | 0.971           | -0.87                | 0.001   | 0.062           |
| Aldh4a1                    | NM_175438                  | ref Mus musculus aldehyde dehydrogenase 4 family, member A1 (Aldh4a1), nuclear gene encoding mitochondrial protein, mRNA [NM_175438]                          | -0.90                 | 0.000   | 0.056           | -0.58                 | 0.000   | 0.012           | -0.81                | 0.000   | 0.010           |
| Egf                        | NM_010113                  | ref Mus musculus epidermal growth factor (Egf), mRNA [NM_010113]                                                                                              | -0.90                 | 0.004   | 0.330           | -0.46                 | 0.028   | 0.986           | -1.12                | 0.001   | 0.067           |
| AW112010                   | NM_001177351               | ref Mus musculus expressed sequence AW112010 (AW112010), mRNA [NM_001177351]                                                                                  | -0.91                 | 0.021   | 0.449           | -0.17                 | 0.044   | 1.000           | -0.73                | 0.000   | 0.019           |
| Tomm20l                    | NM_029227                  | ref Mus musculus translocase of outer mitochondrial membrane 20 homolog (yeast)-like (Tomm20l), nuclear gene encoding mitochondrial protein, mRNA [NM_029227] | -0.91                 | 0.002   | 0.281           | -0.40                 | 0.010   | 0.747           | -0.45                | 0.004   | 0.126           |
| Pcx                        | NM_001162946               | ref Mus musculus pyruvate carboxylase (Pcx), nuclear gene encoding mitochondrial protein, transcript variant 1, mRNA [NM_001162946]                           | -0.91                 | 0.000   | 0.154           | -0.72                 | 0.000   | 0.020           | -1.04                | 0.000   | 0.005           |

Online Supplemental Table IV: All Three Overlap

| Gene Symbol               | RefSeq                    | Description                                                                                                         | logFC<br>mG4H-<br>STZ | P-value | Adj.<br>P-value | logFC<br>mG4H-<br>Veh | P-value | Adj.<br>P-value | logFC<br>Con-<br>STZ | P-value | Adj.<br>P-value |
|---------------------------|---------------------------|---------------------------------------------------------------------------------------------------------------------|-----------------------|---------|-----------------|-----------------------|---------|-----------------|----------------------|---------|-----------------|
| Gm14207                   | NR_030683                 | ref Mus musculus predicted gene 14207 (Gm14207), non-coding RNA [NR_030683]                                         | -0.93                 | 0.006   | 0.365           | -0.31                 | 0.006   | 0.661           | -0.75                | 0.002   | 0.083           |
| Hs3st5                    | NM_001081208              | ref Mus musculus heparan sulfate (glucosamine) 3-O-sulfotransferase 5 (Hs3st5), mRNA [NM_001081208]                 | -0.93                 | 0.010   | 0.400           | -0.49                 | 0.001   | 0.270           | -0.55                | 0.018   | 0.285           |
| Gm12892                   | XR_030521                 | ref PREDICTED: Mus musculus similar to creatine kinase (LOC666937), misc RNA [XR_030521]                            | -0.94                 | 0.000   | 0.066           | -0.27                 | 0.001   | 0.328           | -0.88                | 0.000   | 0.015           |
| Rap2c                     | NM_172413                 | ref Mus musculus RAP2C, member of RAS oncogene family (Rap2c), mRNA [NM_172413]                                     | -0.96                 | 0.002   | 0.253           | -0.57                 | 0.008   | 0.709           | -0.52                | 0.009   | 0.206           |
| Gnb3                      | NM_013530                 | ref Mus musculus guanine nucleotide binding protein (G protein), beta 3 (Gnb3), mRNA [NM_013530]                    | -0.98                 | 0.003   | 0.288           | -0.76                 | 0.000   | 0.067           | -0.73                | 0.001   | 0.070           |
| Tspan10                   | NM_145363                 | ref Mus musculus tetraspanin 10 (Tspan10), mRNA [NM_145363]                                                         | -0.99                 | 0.000   | 0.048           | -0.94                 | 0.000   | 0.188           | -0.96                | 0.000   | 0.003           |
| Ckb                       | NM_021273                 | ref Mus musculus creatine kinase, brain (Ckb), mRNA [NM_021273]                                                     | -1.00                 | 0.000   | 0.048           | -0.29                 | 0.002   | 0.357           | -0.90                | 0.000   | 0.011           |
| chr4:11899775-11931875_F  | chr4:11899775-11931875_F  | lincRNA:chr4:11899775-11931875 forward strand                                                                       | -1.00                 | 0.000   | 0.121           | -0.29                 | 0.010   | 0.762           | -1.10                | 0.000   | 0.023           |
| Iqgap2                    | NM_027711                 | ref Mus musculus IQ motif containing GTPase activating protein 2 (Iqgap2), mRNA [NM_027711]                         | -1.01                 | 0.000   | 0.048           | -0.70                 | 0.002   | 0.377           | -0.97                | 0.001   | 0.072           |
| Gchfr                     | NM_177157                 | ref Mus musculus GTP cyclohydrolase I feedback regulator (Gchfr), mRNA [NM_177157]                                  | -1.02                 | 0.000   | 0.069           | -0.66                 | 0.000   | 0.108           | -0.83                | 0.000   | 0.024           |
| Prkcz                     | NM_008860                 | ref Mus musculus protein kinase C, zeta (Prkcz), transcript variant 1, mRNA [NM_008860]                             | -1.03                 | 0.000   | 0.136           | -0.38                 | 0.002   | 0.347           | -0.83                | 0.001   | 0.054           |
| chr17:32044823-32045974_R | chr17:32044823-32045974_R | lincRNA:chr17:32044823-32045974 reverse strand                                                                      | -1.03                 | 0.005   | 0.346           | -0.44                 | 0.005   | 0.578           | -0.65                | 0.000   | 0.045           |
| Oxct1                     | NM_024188                 | ref Mus musculus 3-oxoacid CoA transferase 1 (Oxct1), nuclear gene encoding mitochondrial protein, mRNA [NM_024188] | -1.04                 | 0.000   | 0.092           | -0.65                 | 0.002   | 0.377           | -0.88                | 0.000   | 0.030           |
| Polq                      | NM_029977                 | ref Mus musculus polymerase (DNA directed), theta (Polq), transcript variant 1, mRNA [NM_029977]                    | -1.04                 | 0.009   | 0.398           | -0.34                 | 0.001   | 0.317           | -1.00                | 0.004   | 0.141           |
| Lrrn1                     | NM_008516                 | ref Mus musculus leucine rich repeat protein 1, neuronal (Lrrn1), mRNA [NM_008516]                                  | -1.05                 | 0.001   | 0.206           | -0.43                 | 0.029   | 0.986           | -1.14                | 0.000   | 0.015           |
| Gm8075                    | XM_983512                 | ref PREDICTED: Mus musculus predicted gene, EG666385 (EG666385), mRNA [XM_983512]                                   | -1.05                 | 0.004   | 0.318           | -0.68                 | 0.000   | 0.039           | -0.65                | 0.013   | 0.242           |
| Dupd1                     | NM_001013826              | ref Mus musculus dual specificity phosphatase and pro isomerase domain containing 1 (Dupd1), mRNA [NM_001013826]    | -1.07                 | 0.001   | 0.173           | -0.90                 | 0.001   | 0.333           | -1.21                | 0.000   | 0.011           |
| Lgi1                      | NM_020278                 | ref Mus musculus leucine-rich repeat LGI family, member 1 (Lgi1), mRNA [NM_020278]                                  | -1.07                 | 0.000   | 0.090           | -0.44                 | 0.005   | 0.578           | -1.06                | 0.005   | 0.146           |
| Ttc39a                    | NM_153392                 | ref Mus musculus tetratricopeptide repeat domain 39A (Ttc39a), transcript variant 2, mRNA [NM_153392]               | -1.07                 | 0.009   | 0.398           | -0.68                 | 0.004   | 0.522           | -1.19                | 0.004   | 0.132           |

Online Supplemental Table IV: All Three Overlap

| Gene Symbol               | RefSeq                    | Description                                                                                                                                                              | logFC<br>mG4H-<br>STZ | P-value | Adj.<br>P-value | logFC<br>mG4H-<br>Veh | P-value | Adj.<br>P-value | logFC<br>Con-<br>STZ | P-value | Adj.<br>P-value |
|---------------------------|---------------------------|--------------------------------------------------------------------------------------------------------------------------------------------------------------------------|-----------------------|---------|-----------------|-----------------------|---------|-----------------|----------------------|---------|-----------------|
| chr17:32035750-32056000_R | chr17:32035750-32056000_R | lincRNA:chr17:32035750-32056000 reverse strand                                                                                                                           | -1.09                 | 0.002   | 0.271           | -0.44                 | 0.004   | 0.535           | -0.72                | 0.000   | 0.030           |
| Gm1673                    | NM_001033458              | ref Mus musculus predicted gene 1673 (Gm1673), mRNA [NM_001033458]                                                                                                       | -1.10                 | 0.000   | 0.161           | -0.28                 | 0.033   | 1.000           | -1.06                | 0.000   | 0.004           |
| chr17:32044823-32045974_R | chr17:32044823-32045974_R | lincRNA:chr17:32044823-32045974 reverse strand                                                                                                                           | -1.10                 | 0.002   | 0.266           | -0.44                 | 0.002   | 0.397           | -0.73                | 0.000   | 0.022           |
| chr17:32044823-32045974_R | chr17:32044823-32045974_R | lincRNA:chr17:32044823-32045974 reverse strand                                                                                                                           | -1.10                 | 0.002   | 0.279           | -0.41                 | 0.003   | 0.496           | -0.87                | 0.000   | 0.025           |
| Olf975                    | NM_146828                 | ref Mus musculus olfactory receptor 975 (Olf975), mRNA [NM_146828]                                                                                                       | -1.11                 | 0.000   | 0.136           | -0.98                 | 0.026   | 0.971           | -0.76                | 0.023   | 0.317           |
| chr17:32035750-32056000_R | chr17:32035750-32056000_R | lincRNA:chr17:32035750-32056000 reverse strand                                                                                                                           | -1.12                 | 0.002   | 0.271           | -0.50                 | 0.001   | 0.263           | -0.70                | 0.000   | 0.046           |
| ENSMUST00000021378        | ENSMUST00000021378        | ens RIKEN cDNA 4930512B01 gene Gene [Source:MGI Symbol;Acc:MGI:1921974] [ENSMUST00000021378]                                                                             | -1.17                 | 0.004   | 0.313           | -0.59                 | 0.012   | 0.793           | -0.65                | 0.012   | 0.234           |
| Lrrc4b                    | NM_198250                 | ref Mus musculus leucine rich repeat containing 4B (Lrrc4b), mRNA [NM_198250]                                                                                            | -1.17                 | 0.001   | 0.167           | -0.62                 | 0.000   | 0.133           | -1.11                | 0.002   | 0.096           |
| 7530428D23Rik             | XM_887943                 | ref PREDICTED: Mus musculus RIKEN cDNA 7530428D23 gene (7530428D23Rik), mRNA [XM_887943]                                                                                 | -1.18                 | 0.000   | 0.017           | -0.87                 | 0.002   | 0.409           | -1.14                | 0.000   | 0.010           |
| Cdh4                      | NM_009867                 | ref Mus musculus cadherin 4 (Cdh4), mRNA [NM_009867]                                                                                                                     | -1.19                 | 0.000   | 0.136           | -0.77                 | 0.000   | 0.149           | -1.09                | 0.001   | 0.059           |
| Cd74                      | NM_001042605              | ref Mus musculus CD74 antigen (invariant polypeptide of major histocompatibility complex, class II antigen-associated) (Cd74), transcript variant 1, mRNA [NM_001042605] | -1.19                 | 0.009   | 0.398           | -0.24                 | 0.049   | 1.000           | -0.93                | 0.007   | 0.179           |
| Fam83e                    | NM_001033170              | ref Mus musculus family with sequence similarity 83, member E (Fam83e), mRNA [NM_001033170]                                                                              | -1.20                 | 0.000   | 0.026           | -0.72                 | 0.000   | 0.069           | -1.11                | 0.000   | 0.004           |
| H2-Aa                     | NM_010378                 | ref Mus musculus histocompatibility 2, class II antigen A, alpha (H2-Aa), mRNA [NM_010378]                                                                               | -1.23                 | 0.010   | 0.403           | -0.26                 | 0.036   | 1.000           | -0.98                | 0.005   | 0.154           |
| Lrrc4b                    | NM_198250                 | ref Mus musculus leucine rich repeat containing 4B (Lrrc4b), mRNA [NM_198250]                                                                                            | -1.23                 | 0.000   | 0.100           | -0.72                 | 0.000   | 0.035           | -1.18                | 0.001   | 0.067           |
| Slc5a11                   | NM_146198                 | ref Mus musculus solute carrier family 5 (sodium/glucose cotransporter), member 11 (Slc5a11), mRNA [NM_146198]                                                           | -1.24                 | 0.000   | 0.034           | -0.83                 | 0.000   | 0.133           | -1.20                | 0.000   | 0.030           |
| Cdh4                      | NM_009867                 | ref Mus musculus cadherin 4 (Cdh4), mRNA [NM_009867]                                                                                                                     | -1.24                 | 0.001   | 0.246           | -0.85                 | 0.000   | 0.110           | -0.96                | 0.005   | 0.154           |
| Scgb1c1                   | NM_001099742              | ref Mus musculus secretoglobin, family 1C, member 1 (Scgb1c1), mRNA [NM_001099742]                                                                                       | -1.25                 | 0.000   | 0.136           | -1.15                 | 0.000   | 0.031           | -1.13                | 0.000   | 0.009           |
| Spc24                     | NM_026282                 | ref Mus musculus SPC24, NDC80 kinetochore complex component, homolog (S. cerevisiae) (Spc24), mRNA [NM_026282]                                                           | -1.28                 | 0.000   | 0.047           | -0.57                 | 0.000   | 0.036           | -1.35                | 0.000   | 0.003           |

Online Supplemental Table IV: All Three Overlap

| Gene Symbol                | RefSeq                     | Description                                                                                                                                                                         | logFC<br>mG4H-<br>STZ | P-value | Adj.<br>P-value | logFC<br>mG4H-<br>Veh | P-value | Adj.<br>P-value | logFC<br>Con-<br>STZ | P-value | Adj.<br>P-value |
|----------------------------|----------------------------|-------------------------------------------------------------------------------------------------------------------------------------------------------------------------------------|-----------------------|---------|-----------------|-----------------------|---------|-----------------|----------------------|---------|-----------------|
| Klra8                      | NM_010650                  | ref Mus musculus killer cell lectin-like receptor, subfamily A, member 8 (Klra8), transcript variant 2, mRNA [NM_010650]                                                            | -1.29                 | 0.002   | 0.272           | -0.38                 | 0.025   | 0.967           | -1.42                | 0.000   | 0.012           |
| chr4:119967625-119978325_F | chr4:119967625-119978325_F | lincRNA:chr4:119967625-119978325 forward strand                                                                                                                                     | -1.36                 | 0.000   | 0.057           | -0.41                 | 0.013   | 0.793           | -1.67                | 0.000   | 0.001           |
| Dbc1                       | NM_019967                  | ref Mus musculus deleted in bladder cancer 1 (human) (Dbc1), mRNA [NM_019967]                                                                                                       | -1.37                 | 0.000   | 0.022           | -0.52                 | 0.004   | 0.544           | -1.05                | 0.003   | 0.105           |
| Pstpip1                    | NM_011193                  | ref Mus musculus proline-serine-threonine phosphatase-interacting protein 1 (Pstpip1), mRNA [NM_011193]                                                                             | -1.37                 | 0.000   | 0.028           | -0.41                 | 0.015   | 0.831           | -1.21                | 0.001   | 0.060           |
| Arhgap9                    | NM_146011                  | ref Mus musculus Rho GTPase activating protein 9 (Arhgap9), mRNA [NM_146011]                                                                                                        | -1.39                 | 0.000   | 0.048           | -0.80                 | 0.000   | 0.044           | -1.40                | 0.000   | 0.006           |
| Upb1                       | NM_133995                  | ref Mus musculus ureidopropionase, beta (Upb1), mRNA [NM_133995]                                                                                                                    | -1.52                 | 0.000   | 0.024           | -1.85                 | 0.000   | 0.009           | -0.82                | 0.000   | 0.019           |
| Bdh1                       | NM_001122683               | ref Mus musculus 3-hydroxybutyrate dehydrogenase, type 1 (Bdh1), transcript variant 2, mRNA [NM_001122683]                                                                          | -1.56                 | 0.000   | 0.136           | -1.15                 | 0.000   | 0.022           | -1.29                | 0.000   | 0.005           |
| Gcat                       | NM_013847                  | ref Mus musculus glycine C-acetyltransferase (2-amino-3-ketobutyrate-coenzyme A ligase) (Gcat), nuclear gene encoding mitochondrial protein, transcript variant 1, mRNA [NM_013847] | -1.56                 | 0.000   | 0.002           | -1.05                 | 0.000   | 0.002           | -1.28                | 0.000   | 0.001           |
| Meig1                      | NM_008579                  | ref Mus musculus meiosis expressed gene 1 (Meig1), mRNA [NM_008579]                                                                                                                 | -1.56                 | 0.000   | 0.071           | -0.42                 | 0.000   | 0.093           | -1.37                | 0.000   | 0.004           |
| Padi2                      | NM_008812                  | ref Mus musculus peptidyl arginine deiminase, type II (Padi2), mRNA [NM_008812]                                                                                                     | -1.58                 | 0.001   | 0.206           | -0.56                 | 0.040   | 1.000           | -1.53                | 0.000   | 0.004           |
| Bdh1                       | NM_175177                  | ref Mus musculus 3-hydroxybutyrate dehydrogenase, type 1 (Bdh1), nuclear gene encoding mitochondrial protein, transcript variant 1, mRNA [NM_175177]                                | -1.58                 | 0.000   | 0.071           | -1.06                 | 0.000   | 0.020           | -1.22                | 0.000   | 0.002           |
| chr4:141548769-141574868_R | chr4:141548769-141574868_R | lincRNA:chr4:141548769-141574868 reverse strand                                                                                                                                     | -1.58                 | 0.017   | 0.429           | -0.63                 | 0.020   | 0.889           | -0.73                | 0.027   | 0.344           |
| Meig1                      | NM_008579                  | ref Mus musculus meiosis expressed gene 1 (Meig1), mRNA [NM_008579]                                                                                                                 | -1.65                 | 0.000   | 0.095           | -0.40                 | 0.001   | 0.256           | -1.36                | 0.000   | 0.008           |
| Cib3                       | NM_001080812               | ref Mus musculus calcium and integrin binding family member 3 (Cib3), mRNA [NM_001080812]                                                                                           | -1.71                 | 0.000   | 0.002           | -1.82                 | 0.000   | 0.000           | -1.15                | 0.000   | 0.029           |
| Bdh1                       | NM_001122683               | ref Mus musculus 3-hydroxybutyrate dehydrogenase, type 1 (Bdh1), transcript variant 2, mRNA [NM_001122683]                                                                          | -1.81                 | 0.000   | 0.034           | -1.24                 | 0.000   | 0.004           | -1.61                | 0.000   | 0.002           |
| Cpxm2                      | NM_018867                  | ref Mus musculus carboxypeptidase X 2 (M14 family) (Cpxm2), mRNA [NM_018867]                                                                                                        | -1.84                 | 0.000   | 0.037           | -1.33                 | 0.000   | 0.007           | -1.47                | 0.000   | 0.012           |
| Tmprss4                    | NM_145403                  | ref Mus musculus transmembrane protease, serine 4 (Tmprss4), mRNA [NM_145403]                                                                                                       | -1.91                 | 0.000   | 0.022           | -0.43                 | 0.011   | 0.777           | -2.32                | 0.000   | 0.003           |

| Online Supplemental Table IV: All Three Overlap |           |                                                                                                                                               |                       |         |                 |                       |         |                 |                      |         |                 |
|-------------------------------------------------|-----------|-----------------------------------------------------------------------------------------------------------------------------------------------|-----------------------|---------|-----------------|-----------------------|---------|-----------------|----------------------|---------|-----------------|
| Gene Symbol                                     | RefSeq    | Description                                                                                                                                   | logFC<br>mG4H-<br>STZ | P-value | Adj.<br>P-value | logFC<br>mG4H-<br>Veh | P-value | Adj.<br>P-value | logFC<br>Con-<br>STZ | P-value | Adj.<br>P-value |
| <b>Pah</b>                                      | NM_008777 | ref Mus musculus phenylalanine hydroxylase (Pah), mRNA [NM_008777]                                                                            | -2.14                 | 0.000   | 0.003           | -1.24                 | 0.000   | 0.008           | -2.25                | 0.000   | 0.002           |
| <b>Abat</b>                                     | NM_172961 | ref Mus musculus 4-aminobutyrate aminotransferase (Abat), nuclear gene encoding mitochondrial protein, transcript variant 1, mRNA [NM_172961] | -2.28                 | 0.000   | 0.000           | -1.90                 | 0.000   | 0.004           | -2.13                | 0.000   | 0.000           |
